# Supplementary material for: Diversity-oriented synthesis of glycomimetics
Source: PubMed Central journal article supplement (PMC9814271; doi:10.1038/s42004-021-00520-3), 2021-06-24
Supplement: 42004_2021_520_MOESM1_ESM.pdf [file 42004_2021_520_MOESM1_ESM.pdf]

## **Description of Additional Supplementary Files**

**File Name:** Supplementary Data 1

**Description:** Full details for DFT calculations

**File Name:** Supplementary Data 2

**Description:** The crystallographic information files for compounds 28, 47, 56, 58, and 95
