# Supplementary material for: Diversity-oriented synthesis of glycomimetics
Source: PubMed Central journal article supplement (PMC9814271; doi:10.1038/s42004-021-00520-3), 2021-06-24
Supplement: 42004_2021_520_MOESM3_ESM.pdf [file 42004_2021_520_MOESM3_ESM.pdf]

## Supplementary Data 1

Density functional theory (DFT) computations were performed using the software package Gaussian 16, Revision C. 01.<sup>1</sup> All DFT optimizations were performed using the M06-2X functional<sup>2</sup> with a 6-31+G(d,p) basis set with solvent dichloromethane (DCM) accounted for using the integral equation formalism polarizable continuum model (IEFPCM) and the default parameters of DCM ( $\epsilon = 8.93$ ).<sup>3</sup> The use of the hybrid meta-GGA M06-2X functional of Truhlar was selected based on its proven robustness. This functional accounts for nonlocal effects of electronic dispersion and has been found to give good estimates for reaction enthalpies in bond-forming reactions. The optimized geometries were verified as transition state structures (one imaginary frequency) or minima (zero imaginary frequencies) by frequency calculations. Intrinsic reaction coordinate (IRC) calculations were performed to confirm that all transition state structures were linked to relevant minima.<sup>4,5</sup> The energies of the M06-2X/6-31+G(d,p) optimized structures were further refined by single point calculations performed at the M06-2X/6-311++G(2d,2p) level with solvent DCM accounted for using the IEFPCM solvation model. The thermal corrections to the Gibbs free energies (temperature = 273.15 K) computed at the lower level of theory (M06-2X/6-31+G(d,p)) were added to the electronic energies obtained from the single point calculations to provide the final reported Gibbs free energies. The keyword (integral=grid=ultrafine) was used for all calculations. The reported activation barriers were computed with respect to the separate reagents and associated transition state. The 3D images of all optimized geometries were generated with CYLview<sup>6</sup> and GaussView<sup>67</sup> was used to construct all structures prior to optimization and to visualize the output from the Gaussian 16 calculations. The program NBO 6 was used for the reported second-order perturbation theory NBO analyses performed at the M06-2X/6-31+G(d,p) level of theory. The reported Noncovalent Interaction (NCI) surfaces (isovalue = 0.3 min = -0.05 and max = 0.05) were computed with the M06-2X-D3 functional and a LACV3P++\*\* basis set using the program Jaguar of the Schrödinger software package.<sup>8</sup>

**Protocol for Conformational Searches Providing Structures for DFT Optimizations:** Using the MacroModel program of the Schrödinger software package<sup>9</sup> models were constructed for *re*-stereofacial enamine addition to (*R*)- or (*S*)-2-fluoro-, 2-chloro-, 2-bromopentanal located in a cis-orientation to the L-proline carboxylic acid. The enamine component of these models was derived from the respective ketones, i.e., dioxanone, cyclohexanone, tetrahydropyranone and thiopyranone. The carbon-carbon bond forming distances of these enamine addition models was set to 2.1 Å and the dihedral angle between the aldehyde carbonyl and carbon-halogen bond locked into three different geometries, corresponding to 90°, 180°, and 310° degrees. This resulted in three unique structures for each aldehyde and enamine combination, respectively, resembling (1) Evans-Cornforth (i.e., anti-parallel alignment of carbonyl and  $\alpha$ -halogen substituent) model, (2) Felkin-Anh (i.e., perpendicular orientation of carbonyl and  $\alpha$ -halogen substituent) and (3) a unique model (i.e., gauche orientation of the carbonyl and  $\alpha$ -halogen substituent) termed the Dudding-Britton model. The internal coordinates of the carbons of the enamine alkene and aldehyde carbonyl, as well as, the carbon and halogen atoms of each these transition state models were then frozen, i.e., fixed (see Figures S13 – S18 of Supporting Information for representative images with the noted frozen (fixed) atoms highlighted). Each of these transition state models was next subjected to Monte Carlo conformational searches (MCCS) using the OPLS3 force field. From

these conformational searches, an array of conformers for enamine aldol addition were generated. These conformers were then exported to the program Gaussian 16 and optimized at the IEFPCM<sub>(DCM)</sub> M06-2X/6-31+G(d,p) level of theory as outlined in the above computational methods section. From these optimizations, transition states for enamine addition were located, e.g., labeled as (*R*)-**TS1**<sub>O-F</sub>, (*S*)-**TS2**<sub>O-F</sub> and (*S*)-**TS3**<sub>O-F</sub>. As noted in the above computational methods the energies of these M06-2X/6-31+G(d,p) optimized structures were further refined by single point calculations performed at the M06-2X/6-311++G(2d,2p) level with solvent DCM accounted for using the IEFPCM solvation model. The thermal corrections to the Gibbs free energies (temperature = 273.15 K) computed at the lower level of theory (M06-2X/6-31+G(d,p)) were added to the electronic energies obtained from the single point calculations to provide the final reported Gibbs free energies. The keyword (integral=grid=ultrafine) was used for all calculations. The reported activation barriers were computed with respect to the separate reagents and associated transition state.

---

<sup>1</sup> Gaussian 16, Revision C.01, Frisch, M. J.; Trucks, G. W.; Schlegel, H. B.; Scuseria, G. E.; Robb, M. A.; Cheeseman, J. R.; Scalmani, G.; Barone, V.; Petersson, G. A.; Nakatsuji, H.; Li, X.; Caricato, M.; Marenich, A. V.; Bloino, J.; Janesko, B. G.; Gomperts, R.; Mennucci, B.; Hratchian, H. P.; Ortiz, J. V.; Izmaylov, A. F.; Sonnenberg, J. L.; Williams-Young, D.; Ding, F.; Lipparini, F.; Egidi, F.; Goings, J.; Peng, B.; Petrone, A.; Henderson, T.; Ranasinghe, D.; Zakrzewski, V. G.; Gao, J.; Rega, N.; Zheng, G.; Liang, W.; Hada, M.; Ehara, M.; Toyota, K.; Fukuda, R.; Hasegawa, J.; Ishida, M.; Nakajima, T.; Honda, Y.; Kitao, O.; Nakai, H.; Vreven, T.; Throssell, K.; Montgomery, J. A., Jr; Peralta, J. E.; Ogliaro, F.; Bearpark, M. J.; Heyd, J. J.; Brothers, E. N.; Kudin, K. N.; Staroverov, V. N.; Keith, T. A.; Kobayashi, R.; Normand, J.; Raghavachari, K.; Rendell, A. P.; Burant, J. C.; Iyengar, S. S.; Tomasi, J.; Cossi, M.; Millam, J. M.; Klene, M.; Adamo, C.; Cammi, R.; Ochterski, J. W.; Martin, R. L.; Morokuma, K.; Farkas, O.; Foresman, J. B.; Fox, D. J. Gaussian, Inc., Wallingford CT, 2016.

<sup>2</sup> Zhao, Y.; Truhlar, D. G. The M06 Suite of Density Functionals for Main Group Thermochemistry, Thermochemical Kinetics, Noncovalent Interactions, Excited States, and Transition Elements: Two New Functionals and Systematic Testing of Four M06-class Functionals and 12 Other Functionals. *Theor. Chem. Acc.* **2008**, *120*, 215-241.

<sup>3</sup> Cancès, E.; Mennucci, B.; Tomasi, J. A New Integral Equation Formalism for the Polarizable Continuum Model: Theoretical Background and Applications to Isotropic and Anisotropic Dielectrics. *J. Chem. Phys.* **1997**, *107*, 3032–3041.

<sup>4</sup> C. González and H. B. Schlegel, Reaction path following in mass-weighted internal coordinates, *J. Phys. Chem.* **1990**, *94*, 5523–5527.

<sup>5</sup> K. Fukui, The Path of Chemical Reactions – The IRC Approach, *Acc. Chem. Res.* **1981**, *14*, 363–368.

<sup>6</sup> Legault, C. Y. CYLview, version 1.0b; Université de Sherbrooke: Quebec, Canada, **2009**;

<http://www.cylview.org>.

<sup>7</sup> GaussView, Version 6, Dennington, Roy; Keith, Todd A.; Millam, John M. Semichem Inc., Shawnee Mission, KS, 2016.

<sup>8</sup> Schrödinger Release 2019–2: Jaguar; Schrödinger, LLC: New York, 2019.

<sup>9</sup> Schrödinger Release 2019–2: MacroModel; Schrödinger, LLC: New York, 2019.

## Energies of Calculated Structures and Cartesian Coordinates

**Supplementary Table 4.** Energies for enamine addition to 2-chloropentanal. Reported relative Gibbs free energy energies for structures optimized at the IEFPCM<sub>(DCM)</sub>M06-2X/6-311++G(2d,2p)//IEFPCM<sub>(DCM)</sub>M06-2X/6-31+G(d,p) level of theory represent the sum of the thermal correction to Gibbs free energy computed at the IEFPCM<sub>(DCM)</sub>M06-2X/6-31+G(d,p) level of theory and single point energies computed at the IEFPCM<sub>(DCM)</sub>M06-2X/6-311++G(2d,2p). All energies are reported in Hartrees.

| Structure                                 | Single Point Energies, E<br>IEFPCM <sub>(DCM)</sub> M06-2X/6-311++G(2d,2p) | Thermal Corrections to Gibbs Free Energies,<br>IEFPCM <sub>(DCM)</sub> M06-2X/6-31+G(d,p) | Gibbs Free Energies (G),<br>IEFPCM <sub>(DCM)</sub> M06-2X/6-31+G(d,p) | Gibbs Free Energies (G),<br>IEFPCM <sub>(DCM)</sub> M06-2X/6-311++G(2d,2p)//<br>IEFPCM <sub>(DCM)</sub> M06-2X/6-31+G(d,p) |
|-------------------------------------------|----------------------------------------------------------------------------|-------------------------------------------------------------------------------------------|------------------------------------------------------------------------|----------------------------------------------------------------------------------------------------------------------------|
| 2-Chloropentanal                          | -731.33393130                                                              | 0.102879                                                                                  | -731.121809                                                            | -731.2310523                                                                                                               |
| Enamine of Cyclohexanone (G)              | -634.55147535                                                              | 0.238392                                                                                  | -634.142903                                                            | -634.3130834                                                                                                               |
| Enamine of Dioxane (O)                    | -784.98483791                                                              | 0.244077                                                                                  | -784.522619                                                            | -784.7407609                                                                                                               |
| Enamine of Tetrahydro-4H-thiopyranone (T) | -993.43210840                                                              | 0.210205                                                                                  | -993.028735                                                            | -993.2219034                                                                                                               |
| Enamine of Tetrahydro-4H-pyranone (P)     | -670.45469021                                                              | 0.214793                                                                                  | -670.055312                                                            | -670.2398972                                                                                                               |
| (R)-TS1 <sub>P</sub> -Cl-Pre              | -1401.806718                                                               | 0.33727                                                                                   | -1401.176087                                                           | -1401.469448                                                                                                               |
| (R)-TS1 <sub>P</sub> -Cl                  | -1401.797805                                                               | 0.340985                                                                                  | -1401.164861                                                           | -1401.45682                                                                                                                |
| (R)-TS1 <sub>P</sub> -Cl-P                | -1401.829317                                                               | 0.344987                                                                                  | -1401.192882                                                           | -1401.48433                                                                                                                |
| (S)-TS1 <sub>P</sub> -Cl-Pre              | -1401.805905                                                               | 0.337081                                                                                  | -1401.175625                                                           | -1401.468824                                                                                                               |
| (S)-TS1 <sub>P</sub> -Cl                  | -1401.791734                                                               | 0.341063                                                                                  | -1401.159001                                                           | -1401.450671                                                                                                               |
| (S)-TS1 <sub>P</sub> -Cl-P                | -1401.825061                                                               | 0.345083                                                                                  | -1401.188431                                                           | -1401.479978                                                                                                               |
| (R)-TS1 <sub>G</sub> -Cl-Pre              | -1365.903561                                                               | 0.361196                                                                                  | -1365.263491                                                           | -1365.542365                                                                                                               |
| (R)-TS1 <sub>G</sub> -Cl                  | -1365.894619                                                               | 0.36506                                                                                   | -1365.252009                                                           | -1365.529559                                                                                                               |
| (R)-TS1 <sub>G</sub> -Cl-P                | -1365.927951                                                               | 0.368557                                                                                  | -1365.282361                                                           | -1365.559394                                                                                                               |
| (S)-TS1 <sub>G</sub> -Cl-Pre              | -1365.902931                                                               | 0.361683                                                                                  | -1365.262572                                                           | -1365.541248                                                                                                               |
| (S)-TS1 <sub>G</sub> -Cl                  | -1365.888191                                                               | 0.364994                                                                                  | -1365.245974                                                           | -1365.523197                                                                                                               |
| (S)-TS1 <sub>G</sub> -Cl-P                | -1365.923664                                                               | 0.369188                                                                                  | -1365.277488                                                           | -1365.554476                                                                                                               |
| (R)-TS1 <sub>O</sub> -Cl-Pre              | -1516.33886                                                                | 0.367316                                                                                  | -1515.644924                                                           | -1515.971544                                                                                                               |
| (R)-TS1 <sub>O</sub> -Cl                  | -1516.327244                                                               | 0.369496                                                                                  | -1515.632299                                                           | -1515.957748                                                                                                               |
| (R)-TS1 <sub>O</sub> -Cl-P                | -1516.354                                                                  | 0.372133                                                                                  | -1515.656854                                                           | -1515.981867                                                                                                               |
| (S)-TS1 <sub>O</sub> -Cl-Pre              | -1516.336956                                                               | 0.366549                                                                                  | -1515.644002                                                           | -1515.970407                                                                                                               |
| (S)-TS1 <sub>O</sub> -Cl                  | -1516.322975                                                               | 0.369358                                                                                  | -1515.628417                                                           | -1515.953617                                                                                                               |
| (S)-TS1 <sub>O</sub> -Cl-P                | -1516.35131                                                                | 0.372586                                                                                  | -1515.653803                                                           | -1515.978724                                                                                                               |
| (R)-TS1 <sub>T</sub> -Cl-Pre              | -1724.786027                                                               | 0.333886                                                                                  | -1724.150088                                                           | -1724.452141                                                                                                               |
| (R)-TS1 <sub>T</sub> -Cl                  | -1724.774436                                                               | 0.336803                                                                                  | -1724.137252                                                           | -1724.437633                                                                                                               |
| (R)-TS1 <sub>T</sub> -Cl-P                | -1724.806482                                                               | 0.341091                                                                                  | -1724.165365                                                           | -1724.465391                                                                                                               |
| (S)-TS1 <sub>T</sub> -Cl-Pre              | -1724.785259                                                               | 0.333383                                                                                  | -1724.150079                                                           | -1724.451876                                                                                                               |
| (S)-TS1 <sub>T</sub> -Cl                  | -1724.768234                                                               | 0.337056                                                                                  | -1724.131053                                                           | -1724.431178                                                                                                               |
| (S)-TS1 <sub>T</sub> -Cl-P                | -1724.802266                                                               | 0.341112                                                                                  | -1724.161176                                                           | -1724.461154                                                                                                               |

Pre – Precomplex

P – Product

2-Chloropentanal

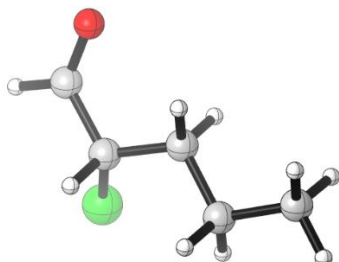

-----  
- Thermochemistry -  
-----

|                                              |                             |
|----------------------------------------------|-----------------------------|
| Zero-point correction=                       | 0.133590 (Hartree/Particle) |
| Thermal correction to Energy=                | 0.141018                    |
| Thermal correction to Enthalpy=              | 0.141883                    |
| Thermal correction to Gibbs Free Energy=     | 0.102879                    |
| Sum of electronic and zero-point Energies=   | -731.091098                 |
| Sum of electronic and thermal Energies=      | -731.083671                 |
| Sum of electronic and thermal Enthalpies=    | -731.082806                 |
| Sum of electronic and thermal Free Energies= | -731.121809                 |

Number of Imaginary Frequencies = 0

E (Single Point Energy) [IEFPCM(DCM)M06-2X/6-311++G(2d,2p)] = -731.3339313

|   |             |             |             |
|---|-------------|-------------|-------------|
| C | 1.85100300  | -0.87752800 | 0.16285700  |
| H | 2.83568300  | -0.41605600 | 0.35801200  |
| C | 0.64361300  | -0.00294100 | 0.46470400  |
| O | 1.75342600  | -2.00654500 | -0.25203400 |
| C | -0.65978200 | -0.54897700 | -0.08583300 |
| H | -0.58573500 | -0.62038200 | -1.17752500 |
| C | -1.89068300 | 0.25927800  | 0.31780000  |
| H | -1.92701900 | 0.33945500  | 1.41147400  |
| H | -1.80392700 | 1.27950400  | -0.07116600 |
| H | -0.74936600 | -1.57511100 | 0.29135100  |
| C | -3.17803900 | -0.38083200 | -0.19765600 |
| H | -3.30122900 | -1.39166600 | 0.20411100  |
| H | -4.05406200 | 0.20596500  | 0.09049200  |
| H | -3.16572500 | -0.45356800 | -1.28993000 |
| H | 0.59195400  | 0.13274400  | 1.55109400  |

Cl 1.03149200 1.63867500 -0.19546300

### Cyclohexanone Enamine

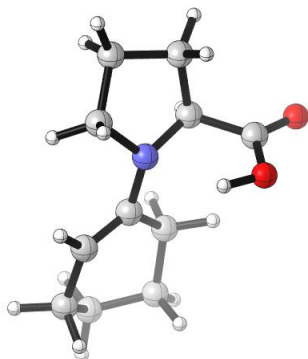

-----  
- Thermochemistry -  
-----

|                                              |                             |
|----------------------------------------------|-----------------------------|
| Zero-point correction=                       | 0.273667 (Hartree/Particle) |
| Thermal correction to Energy=                | 0.284624                    |
| Thermal correction to Enthalpy=              | 0.285489                    |
| Thermal correction to Gibbs Free Energy=     | 0.238392                    |
| Sum of electronic and zero-point Energies=   | -634.107628                 |
| Sum of electronic and thermal Energies=      | -634.096671                 |
| Sum of electronic and thermal Enthalpies=    | -634.095806                 |
| Sum of electronic and thermal Free Energies= | -634.142903                 |

Number of Imaginary Frequencies = 0

E (Single Point Energy) [IEFPCM(DCM)M06-2X/6-311++G(2d,2p)] = -634.55147535

|   |             |             |             |
|---|-------------|-------------|-------------|
| C | -1.82195600 | 1.11295500  | 0.60857400  |
| H | -1.53065100 | 2.00743300  | 1.15254600  |
| C | -0.86893400 | 0.31843700  | 0.08450900  |
| N | 0.50219300  | 0.64457600  | 0.17935600  |
| C | 1.52533600  | -0.13928100 | -0.50793400 |
| H | 1.26454400  | -0.39338700 | -1.54236100 |
| C | 0.90391500  | 2.05917500  | 0.29321800  |
| H | 1.09601800  | 2.32552600  | 1.33963000  |
| H | 0.09895100  | 2.70108000  | -0.07729900 |
| C | 2.16670900  | 2.16745400  | -0.56331200 |
| H | 2.84630600  | 2.94751600  | -0.21495100 |
| H | 1.89270700  | 2.38510000  | -1.60048900 |
| C | 2.77115200  | 0.76866800  | -0.46975400 |
| H | 3.46659400  | 0.52461600  | -1.27363200 |

|   |             |             |             |
|---|-------------|-------------|-------------|
| H | 3.29080200  | 0.64607400  | 0.48753700  |
| C | -1.20813400 | -0.97782600 | -0.62247900 |
| H | -1.03547100 | -0.85379700 | -1.70047700 |
| H | -0.53671900 | -1.78009000 | -0.29623000 |
| C | -3.60717500 | -0.23343600 | -0.54792400 |
| C | 1.84596700  | -1.43833300 | 0.22161200  |
| O | 1.50430300  | -1.46277000 | 1.51338400  |
| O | 2.41933300  | -2.36724700 | -0.29892800 |
| H | 1.02403400  | -0.63129700 | 1.70301300  |
| C | -2.65327600 | -1.41167600 | -0.37333700 |
| C | -3.30092600 | 0.83560900  | 0.49995500  |
| H | -2.90726500 | -2.23166200 | -1.05172400 |
| H | -2.74331500 | -1.79790900 | 0.65020300  |
| H | -3.69314100 | 0.51417800  | 1.47602000  |
| H | -3.82836000 | 1.76531900  | 0.25643500  |
| H | -4.64847900 | -0.56023100 | -0.46503100 |
| H | -3.47705100 | 0.18915800  | -1.55310100 |

### Dioxane Enamine

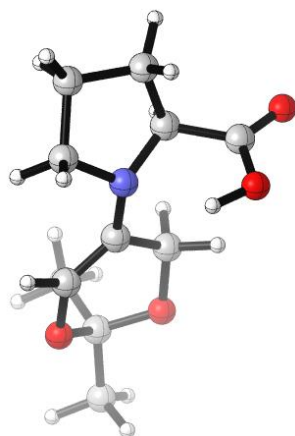

-----  
 - Thermochemistry -  
 -----

|                                              |                             |
|----------------------------------------------|-----------------------------|
| Zero-point correction=                       | 0.281659 (Hartree/Particle) |
| Thermal correction to Energy=                | 0.294503                    |
| Thermal correction to Enthalpy=              | 0.295368                    |
| Thermal correction to Gibbs Free Energy=     | 0.244077                    |
| Sum of electronic and zero-point Energies=   | -784.485037                 |
| Sum of electronic and thermal Energies=      | -784.472193                 |
| Sum of electronic and thermal Enthalpies=    | -784.471328                 |
| Sum of electronic and thermal Free Energies= | -784.522619                 |

Number of Imaginary Frequencies = 0

E (Single Point Energy) [IEFPCM(DCM)M06-2X/6-311++G(2d,2p)] = -784.98483791

|   |             |             |             |
|---|-------------|-------------|-------------|
| C | 1.22503300  | 1.21865900  | -0.76338000 |
| H | 1.00442800  | 2.16629800  | -1.23735600 |
| C | 0.30007300  | 0.36278500  | -0.30177000 |
| N | -1.08975000 | 0.61880300  | -0.35293300 |
| C | -1.98615800 | -0.14099200 | 0.52122700  |
| H | -1.60401700 | -0.27174100 | 1.54163100  |
| C | -1.53015800 | 2.02677100  | -0.45187600 |
| H | -1.77966400 | 2.27044100  | -1.49000200 |
| H | -0.72493500 | 2.69425100  | -0.12831800 |
| C | -2.74187500 | 2.12835100  | 0.47919800  |
| H | -3.48394400 | 2.84537400  | 0.12365600  |
| H | -2.41667800 | 2.43674400  | 1.47746700  |
| C | -3.27731200 | 0.69943900  | 0.53063000  |
| H | -3.88699500 | 0.48231200  | 1.40835600  |
| H | -3.86759100 | 0.48039200  | -0.36634500 |
| C | 0.75393400  | -0.97387300 | 0.23585400  |
| H | 0.60125300  | -1.04343900 | 1.32333700  |
| H | 0.20111700  | -1.79321800 | -0.23344900 |
| O | 2.57637300  | 0.96536100  | -0.72609700 |
| O | 2.11077200  | -1.21055500 | -0.09341900 |
| C | 2.96379300  | -0.10522500 | 0.13306500  |
| C | 4.34641200  | -0.53267600 | -0.30857900 |
| H | 4.71319700  | -1.32809000 | 0.34357000  |
| H | 5.02916200  | 0.31780500  | -0.25614200 |
| C | 2.93046000  | 0.35712800  | 1.58718100  |
| H | 3.70484200  | 1.11143200  | 1.74177900  |
| H | 3.12643700  | -0.49369600 | 2.24479000  |
| H | 1.96638700  | 0.79812300  | 1.85011200  |
| C | -2.30638100 | -1.51802100 | -0.04765400 |
| O | -2.15580900 | -1.63013200 | -1.37052300 |
| O | -2.72550100 | -2.43111200 | 0.62417000  |
| H | 4.30228500  | -0.89834500 | -1.33654400 |
| H | -1.77064900 | -0.78883700 | -1.69243300 |

### Tetrahydro-4H-thiopyranone Enamine

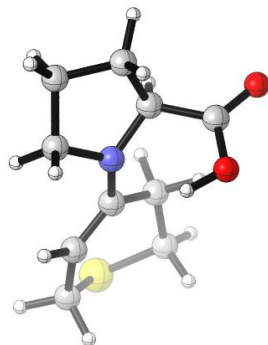

-----  
- Thermochemistry -  
-----

|                                              |                             |
|----------------------------------------------|-----------------------------|
| Zero-point correction=                       | 0.246271 (Hartree/Particle) |
| Thermal correction to Energy=                | 0.257547                    |
| Thermal correction to Enthalpy=              | 0.258412                    |
| Thermal correction to Gibbs Free Energy=     | 0.210205                    |
| Sum of electronic and zero-point Energies=   | -992.992669                 |
| Sum of electronic and thermal Energies=      | -992.981393                 |
| Sum of electronic and thermal Enthalpies=    | -992.980528                 |
| Sum of electronic and thermal Free Energies= | -993.028735                 |

Number of Imaginary Frequencies = 0

E (Single Point Energy) [IEFPCM<sub>(DCM)</sub>M06-2X/6-311++G(2d,2p)] = -993.43210840

|   |             |             |             |
|---|-------------|-------------|-------------|
| C | -1.49100900 | 1.13942000  | 0.73968100  |
| H | -1.13785700 | 2.01687300  | 1.27476400  |
| C | -0.58847400 | 0.33055500  | 0.15152200  |
| N | 0.78358500  | 0.65217600  | 0.16756000  |
| C | 1.78155700  | -0.15905300 | -0.52510400 |
| H | 1.48906500  | -0.44159900 | -1.54324900 |
| C | 1.20425000  | 2.06361500  | 0.24844400  |
| H | 1.44165800  | 2.34092500  | 1.28276000  |
| H | 0.39152700  | 2.70890800  | -0.09819200 |
| C | 2.43336000  | 2.14324000  | -0.65756200 |
| H | 3.13020900  | 2.92630600  | -0.35305500 |
| H | 2.12090300  | 2.33830600  | -1.68821100 |
| C | 3.03247200  | 0.74297900  | -0.55227900 |
| H | 3.69713800  | 0.47529100  | -1.37434000 |



|   |             |             |             |
|---|-------------|-------------|-------------|
| H | 3.58529000  | 0.63967000  | 0.38855400  |
| C | -0.95257000 | -0.96013700 | -0.55231000 |
| H | -0.82514400 | -0.82984500 | -1.63398100 |
| H | -0.26322800 | -1.75787300 | -0.25035900 |
| C | 2.11859800  | -1.43900800 | 0.23105100  |
| O | 1.82486100  | -1.42603900 | 1.53523200  |
| O | 2.66301700  | -2.38761100 | -0.28395800 |
| H | 1.36333100  | -0.58592300 | 1.72756700  |
| C | -2.36301500 | -1.45150000 | -0.25442500 |
| C | -2.98471500 | 0.95811700  | 0.75543500  |
| H | -2.61529200 | -2.29150000 | -0.90407700 |
| H | -2.44404600 | -1.78851900 | 0.78398000  |
| H | -3.32967400 | 0.59122400  | 1.72980300  |
| H | -3.47666900 | 1.91963000  | 0.58466200  |
| S | -3.60362800 | -0.15795400 | -0.53852800 |

### Tetrahydropyranone Enamine

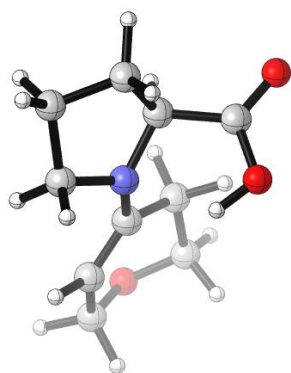

-----  
 - Thermochemistry -  
 -----

|                                              |                             |
|----------------------------------------------|-----------------------------|
| Zero-point correction=                       | 0.250021 (Hartree/Particle) |
| Thermal correction to Energy=                | 0.260784                    |
| Thermal correction to Enthalpy=              | 0.261649                    |
| Thermal correction to Gibbs Free Energy=     | 0.214793                    |
| Sum of electronic and zero-point Energies=   | -670.020084                 |
| Sum of electronic and thermal Energies=      | -670.009321                 |
| Sum of electronic and thermal Enthalpies=    | -670.008456                 |
| Sum of electronic and thermal Free Energies= | -670.055312                 |

Number of Imaginary Frequencies = 0

E (Single Point Energy) [IEFPCM<sub>(DCM)</sub>M06-2X/6-311++G(2d,2p)] = -670.45469021

|   |             |            |            |
|---|-------------|------------|------------|
| C | -1.84748200 | 1.11944800 | 0.54926200 |
|---|-------------|------------|------------|

|   |             |             |             |
|---|-------------|-------------|-------------|
| H | -1.61858700 | 2.03104300  | 1.09210100  |
| C | -0.87250100 | 0.32722400  | 0.06917600  |
| N | 0.49187200  | 0.64484200  | 0.18716000  |
| C | 1.51644600  | -0.13172600 | -0.50807100 |
| H | 1.25648400  | -0.36663000 | -1.54708400 |
| C | 0.89707900  | 2.05592400  | 0.33087600  |
| H | 1.08649400  | 2.29825900  | 1.38325100  |
| H | 0.09573100  | 2.70754100  | -0.02999100 |
| C | 2.16230300  | 2.17571300  | -0.52049600 |
| H | 2.84295500  | 2.94733000  | -0.15611600 |
| H | 1.89128100  | 2.41279100  | -1.55407900 |
| C | 2.76348100  | 0.77376900  | -0.45068200 |
| H | 3.45972400  | 0.54304500  | -1.25765200 |
| H | 3.28107200  | 0.63272200  | 0.50509500  |
| C | -1.22541200 | -0.97606500 | -0.61290100 |
| H | -1.06621500 | -0.88887500 | -1.69451400 |
| H | -0.58924600 | -1.79542500 | -0.25926400 |
| C | 1.83030100  | -1.44411100 | 0.20009500  |
| O | 1.49164400  | -1.48983700 | 1.49242700  |
| O | 2.39584100  | -2.36725200 | -0.33791100 |
| H | 1.01892200  | -0.66002600 | 1.70340000  |
| C | -2.67637800 | -1.34381300 | -0.32458700 |
| C | -3.30733600 | 0.78945400  | 0.38104700  |
| H | -3.00941200 | -2.15333000 | -0.97653600 |
| H | -2.77984800 | -1.67071000 | 0.72142900  |
| H | -3.75364800 | 0.49936300  | 1.34734900  |
| H | -3.85665200 | 1.66193200  | 0.01545700  |
| O | -3.53063000 | -0.24139000 | -0.56517600 |

(*R*)-TS1<sub>p</sub>-Cl-Pre

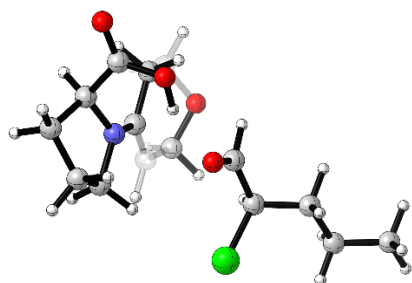

-----  
- Thermochemistry -  
-----

|                                 |                             |
|---------------------------------|-----------------------------|
| Zero-point correction=          | 0.385419 (Hartree/Particle) |
| Thermal correction to Energy=   | 0.404775                    |
| Thermal correction to Enthalpy= | 0.405640                    |

|                                              |              |
|----------------------------------------------|--------------|
| Thermal correction to Gibbs Free Energy=     | 0.337270     |
| Sum of electronic and zero-point Energies=   | -1401.127937 |
| Sum of electronic and thermal Energies=      | -1401.108582 |
| Sum of electronic and thermal Enthalpies=    | -1401.107717 |
| Sum of electronic and thermal Free Energies= | -1401.176087 |

Number of Imaginary Frequencies = 0

E (Single Point Energy) [IEFPCM(DCM)M06-2X/6-311++G(2d,2p)] = -1401.806718

|   |             |             |             |
|---|-------------|-------------|-------------|
| C | -0.20397600 | 1.31198900  | -1.49299500 |
| H | 0.05171200  | 0.61107300  | -2.28157100 |
| C | -1.21064800 | 1.06121000  | -0.62808400 |
| N | -1.89028100 | -0.14796900 | -0.59004800 |
| C | -3.23899300 | -0.27292800 | -0.04565300 |
| H | -3.86139500 | 0.60637300  | -0.23759300 |
| C | -1.61105400 | -1.18237700 | -1.58675700 |
| H | -0.56018100 | -1.48079500 | -1.52804800 |
| H | -1.81428200 | -0.80918300 | -2.60326600 |
| C | -2.57916000 | -2.29469300 | -1.20147000 |
| H | -2.17064500 | -2.87067100 | -0.36393400 |
| H | -2.77954500 | -2.98119300 | -2.02577300 |
| C | -3.82152600 | -1.51139600 | -0.76851700 |
| H | -4.37520300 | -1.17152900 | -1.64803700 |
| H | -4.50632900 | -2.07452600 | -0.13166000 |
| C | -1.55723400 | 2.06413700  | 0.44981600  |
| H | -2.63841400 | 2.23406500  | 0.49349300  |
| H | -1.26071600 | 1.66398400  | 1.42931000  |
| C | 1.12757900  | -0.30719700 | 0.77272800  |
| H | 0.96844300  | 0.62496500  | 1.34567600  |
| C | 2.41510900  | -0.31424000 | -0.01787800 |
| O | 0.36208700  | -1.24269800 | 0.86113900  |
| C | -3.25891400 | -0.48774500 | 1.46984100  |

|    |             |             |             |
|----|-------------|-------------|-------------|
| O  | -2.13940300 | -0.91753100 | 2.04385000  |
| O  | -4.26753300 | -0.31430900 | 2.11954600  |
| C  | 3.59669700  | -0.46879000 | 0.94553400  |
| H  | 3.47036300  | 0.27902600  | 1.74013000  |
| C  | 4.95701900  | -0.26970900 | 0.28023600  |
| H  | 5.08719600  | -1.01495300 | -0.51135600 |
| H  | 4.97877300  | 0.71570000  | -0.20114200 |
| H  | 2.49394100  | 0.63697400  | -0.55163800 |
| H  | 3.53891100  | -1.45659000 | 1.41831700  |
| C  | 6.09709600  | -0.38187200 | 1.29009500  |
| H  | 5.99957400  | 0.37232500  | 2.07746500  |
| H  | 6.09956500  | -1.36729000 | 1.76669300  |
| H  | 7.06637000  | -0.24018800 | 0.80535100  |
| H  | -1.39092700 | -0.97865000 | 1.40800300  |
| C  | -0.86380200 | 3.39846800  | 0.19333800  |
| C  | 0.60652400  | 2.57964700  | -1.41419800 |
| H  | -1.36978700 | 3.93652900  | -0.62225600 |
| H  | -0.88413800 | 4.02440000  | 1.08700100  |
| H  | 1.67127800  | 2.37502000  | -1.56710900 |
| H  | 0.30300200  | 3.29359300  | -2.19813000 |
| O  | 0.49818600  | 3.20435100  | -0.14654600 |
| Cl | 2.39761200  | -1.60460000 | -1.26292500 |

(R)-TS1p-Cl

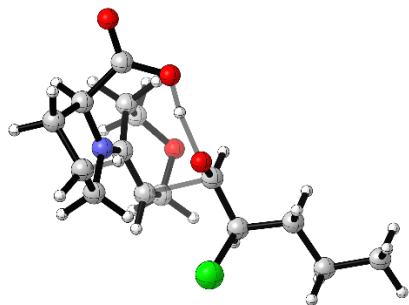

-----  
- Thermochemistry -  
-----

|                                              |                             |
|----------------------------------------------|-----------------------------|
| Zero-point correction=                       | 0.385333 (Hartree/Particle) |
| Thermal correction to Energy=                | 0.403086                    |
| Thermal correction to Enthalpy=              | 0.403951                    |
| Thermal correction to Gibbs Free Energy=     | 0.340985                    |
| Sum of electronic and zero-point Energies=   | -1401.120513                |
| Sum of electronic and thermal Energies=      | -1401.102760                |
| Sum of electronic and thermal Enthalpies=    | -1401.101895                |
| Sum of electronic and thermal Free Energies= | -1401.164861                |

Number of Imaginary Frequencies = 1

E (Single Point Energy) [IEFPCM(DCM)M06-2X/6-311++G(2d,2p)] = -1401.797805

|   |             |             |             |
|---|-------------|-------------|-------------|
| C | -0.01721200 | 1.26192200  | -1.16558600 |
| H | 0.31339200  | 0.64254500  | -1.99428700 |
| C | -1.25845400 | 1.02311600  | -0.59006900 |
| N | -1.87326400 | -0.16200300 | -0.70079200 |
| C | -3.10967800 | -0.52428800 | -0.00377300 |
| H | -3.87573500 | 0.24511100  | -0.12410800 |
| C | -1.44157600 | -1.21153000 | -1.64311000 |
| H | -0.36322000 | -1.35133000 | -1.58583200 |
| H | -1.71877400 | -0.91325400 | -2.66312100 |
| C | -2.22088900 | -2.43487900 | -1.17515500 |
| H | -1.68879200 | -2.91120100 | -0.34478400 |
| H | -2.35295000 | -3.17035700 | -1.97005500 |

|   |             |             |             |
|---|-------------|-------------|-------------|
| C | -3.54282800 | -1.83310400 | -0.69482500 |
| H | -4.17886700 | -1.58693700 | -1.54978300 |
| H | -4.10841900 | -2.47649500 | -0.01940500 |
| C | -1.83503500 | 2.03626800  | 0.36965200  |
| H | -2.92413600 | 2.07788400  | 0.27988400  |
| H | -1.60629800 | 1.72061900  | 1.39722000  |
| C | 0.99635400  | 0.13886200  | 0.42867500  |
| H | 0.93290100  | 1.03312100  | 1.07077300  |
| C | 2.37194900  | -0.01671600 | -0.20628200 |
| O | 0.33709200  | -0.89403400 | 0.71047300  |
| C | -2.95858100 | -0.73223900 | 1.51301300  |
| O | -1.76466600 | -0.89530200 | 2.03084200  |
| O | -3.96776400 | -0.76703300 | 2.19339300  |
| C | 3.37212400  | -0.40242600 | 0.88563300  |
| H | 3.26753600  | 0.33739000  | 1.69111000  |
| C | 4.82540400  | -0.43005300 | 0.41694900  |
| H | 4.93921000  | -1.17818300 | -0.37454600 |
| H | 5.07999300  | 0.54170700  | -0.02428300 |
| H | 2.68887300  | 0.90854300  | -0.68945300 |
| H | 3.07941900  | -1.37382700 | 1.30125100  |
| C | 5.78098600  | -0.74440200 | 1.56642800  |
| H | 5.70424800  | 0.00839100  | 2.35756900  |
| H | 5.55091100  | -1.71941200 | 2.00777700  |
| H | 6.81817100  | -0.76729000 | 1.22201700  |
| H | -0.93459900 | -0.85523500 | 1.40286200  |
| C | -1.25317900 | 3.42315800  | 0.11762500  |
| C | 0.57117200  | 2.65399800  | -1.10950300 |
| H | -1.65612900 | 3.84166900  | -0.81636500 |

|    |             |             |             |
|----|-------------|-------------|-------------|
| H  | -1.50361800 | 4.09782300  | 0.93742500  |
| H  | 1.66376300  | 2.62061300  | -1.06924100 |
| H  | 0.29952600  | 3.22541100  | -2.01167300 |
| O  | 0.15851500  | 3.36467500  | 0.04279800  |
| Cl | 2.34692300  | -1.26916900 | -1.50608700 |

**(R)-TS1<sub>p</sub>-Cl-P**

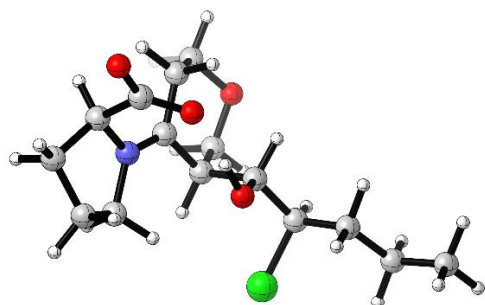

-----  
 - Thermochemistry -  
 -----

|                                            |                             |
|--------------------------------------------|-----------------------------|
| Zero-point correction=                     | 0.389647 (Hartree/Particle) |
| Thermal correction to Energy=              | 0.407384                    |
| Thermal correction to Enthalpy=            | 0.408249                    |
| Thermal correction to Gibbs Free Energy=   | 0.344987                    |
| Sum of electronic and zero-point Energies= | -1401.148222                |
| Sum of electronic and thermal Energies=    | -1401.130485                |
| Sum of electronic and thermal Enthalpies=  | -1401.129620                |

Number of Imaginary Frequencies = 0

E (Single Point Energy) [IEFPCM(DCM)M06-2X/6-311++G(2d,2p)] = -1401.829317

|   |             |             |             |
|---|-------------|-------------|-------------|
| C | 0.16571600  | 1.02749700  | -0.80302600 |
| H | 0.24865100  | 0.53896100  | -1.77545100 |
| C | -1.23826200 | 0.94891400  | -0.28206800 |
| N | -2.03544100 | 0.00873700  | -0.65943500 |
| C | -3.30273200 | -0.31966200 | 0.03120900  |
| H | -3.92013200 | 0.57285400  | 0.13708200  |

|   |             |             |             |
|---|-------------|-------------|-------------|
| C | -1.72372400 | -1.01815800 | -1.70011100 |
| H | -0.68857400 | -1.33896900 | -1.60312700 |
| H | -1.88913900 | -0.55084600 | -2.67573100 |
| C | -2.73431600 | -2.12693500 | -1.42187600 |
| H | -2.33731900 | -2.80724000 | -0.66211900 |
| H | -2.95142800 | -2.70149900 | -2.32300700 |
| C | -3.94527800 | -1.36825200 | -0.87755800 |
| H | -4.49103100 | -0.87978100 | -1.69079200 |
| H | -4.63909700 | -1.99059700 | -0.31237700 |
| C | -1.60056200 | 1.91949600  | 0.80175400  |
| H | -2.67849600 | 1.99076600  | 0.94914600  |
| H | -1.17327600 | 1.52191900  | 1.73148200  |
| C | 1.03924900  | 0.23688600  | 0.23008100  |
| H | 1.05789300  | 0.81918300  | 1.16498800  |
| C | 2.50265700  | 0.11793000  | -0.19552100 |
| O | 0.53488400  | -1.05206200 | 0.44681100  |
| C | -2.99976600 | -0.88751100 | 1.46546000  |
| O | -1.79280500 | -0.98668100 | 1.81412100  |
| O | -4.01679300 | -1.17887500 | 2.11150600  |
| C | 3.32782000  | -0.66957800 | 0.81314400  |
| H | 3.12072700  | -0.23168900 | 1.79957800  |
| C | 4.83171800  | -0.63213600 | 0.55120200  |
| H | 5.04361500  | -1.07527300 | -0.42787900 |
| H | 5.16644200  | 0.41201700  | 0.50579000  |
| H | 2.93171700  | 1.11345700  | -0.32816800 |
| H | 2.96345800  | -1.70124400 | 0.84166900  |
| C | 5.61081500  | -1.37808300 | 1.63282500  |
| H | 5.43484300  | -0.93520200 | 2.61854100  |



|    |             |             |             |
|----|-------------|-------------|-------------|
| H  | 5.30391700  | -2.42795900 | 1.67843800  |
| H  | 6.68604500  | -1.34979200 | 1.43755000  |
| H  | -0.29875600 | -1.02528200 | 0.97869900  |
| C  | -1.01196700 | 3.30819500  | 0.52154200  |
| C  | 0.59086200  | 2.49596800  | -0.95597200 |
| H  | -1.54036600 | 3.78589500  | -0.31573800 |
| H  | -1.11963100 | 3.93620800  | 1.40602100  |
| H  | 1.65439400  | 2.56644100  | -1.18900600 |
| H  | 0.03359200  | 2.95086300  | -1.78739300 |
| O  | 0.36947300  | 3.22779500  | 0.23081900  |
| Cl | 2.61756400  | -0.66254100 | -1.83733500 |

(S)-TS1<sub>P</sub>-Cl-Pre

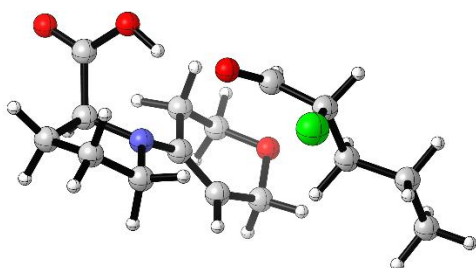

-----  
 - Thermochemistry -  
 -----

|                                              |                             |
|----------------------------------------------|-----------------------------|
| Zero-point correction=                       | 0.385404 (Hartree/Particle) |
| Thermal correction to Energy=                | 0.404710                    |
| Thermal correction to Enthalpy=              | 0.405575                    |
| Thermal correction to Gibbs Free Energy=     | 0.337081                    |
| Sum of electronic and zero-point Energies=   | -1401.127303                |
| Sum of electronic and thermal Energies=      | -1401.107997                |
| Sum of electronic and thermal Enthalpies=    | -1401.107132                |
| Sum of electronic and thermal Free Energies= | -1401.175625                |

Number of Imaginary Frequencies = 0

E (Single Point Energy) [IEFPCM<sub>(DCM)</sub>M06-2X/6-311++G(2d,2p)] = -1401.805905

|   |            |            |             |
|---|------------|------------|-------------|
| C | 0.23958100 | 1.43001400 | -1.21841800 |
|---|------------|------------|-------------|

|   |             |             |             |
|---|-------------|-------------|-------------|
| H | 0.54893400  | 0.80916400  | -2.05331000 |
| C | -0.88396900 | 1.16087000  | -0.52397000 |
| N | -1.64696900 | 0.01202300  | -0.72046600 |
| C | -3.09817700 | 0.02171900  | -0.54240300 |
| H | -3.55543600 | 0.97600100  | -0.82411800 |
| C | -1.24229500 | -0.96921900 | -1.72536900 |
| H | -0.25715200 | -1.37456200 | -1.47054800 |
| H | -1.18451200 | -0.51331300 | -2.72688400 |
| C | -2.36396700 | -1.99820800 | -1.66013700 |
| H | -2.21712600 | -2.65506900 | -0.79592800 |
| H | -2.42209900 | -2.61578300 | -2.55800600 |
| C | -3.59919400 | -1.11294200 | -1.47026400 |
| H | -3.89549100 | -0.67500800 | -2.42729800 |
| H | -4.46330000 | -1.63373500 | -1.05323600 |
| C | -1.31034500 | 2.05766800  | 0.61669000  |
| H | -2.37676300 | 2.30132900  | 0.54736400  |
| H | -1.17108100 | 1.52584400  | 1.56790100  |
| C | 0.97694500  | -0.75688800 | 1.32078500  |
| H | 0.89212800  | 0.26167200  | 1.74374600  |
| C | 2.39811900  | -1.15740800 | 0.99405300  |
| O | 0.00527500  | -1.46354600 | 1.17820900  |
| C | -3.52819200 | -0.25124700 | 0.89988700  |
| O | -2.63974000 | -0.82854100 | 1.70165200  |
| O | -4.64783300 | 0.00669500  | 1.28722200  |
| C | 3.10253600  | -0.07557200 | 0.17939700  |
| H | 2.63996200  | -0.02760200 | -0.81410000 |
| C | 4.61109300  | -0.27218800 | 0.05707200  |
| H | 5.04790500  | -0.33517500 | 1.06129200  |

|    |             |             |             |
|----|-------------|-------------|-------------|
| H  | 4.81618700  | -1.22600600 | -0.44033800 |
| H  | 2.91164900  | -1.28668100 | 1.95544400  |
| H  | 2.89900500  | 0.88331800  | 0.67672200  |
| C  | 5.25856800  | 0.87028400  | -0.72267400 |
| H  | 5.08674900  | 1.83067200  | -0.22555700 |
| H  | 6.33812500  | 0.72556400  | -0.81233100 |
| H  | 4.84275200  | 0.93603700  | -1.73354800 |
| H  | -1.76489400 | -0.93812100 | 1.26433900  |
| C  | -0.50959700 | 3.35599500  | 0.61557000  |
| C  | 1.10703100  | 2.61701500  | -0.88758600 |
| H  | -0.86993700 | 4.02204500  | -0.18282100 |
| H  | -0.60865200 | 3.87441300  | 1.57080700  |
| H  | 2.16759800  | 2.35276100  | -0.93546800 |
| H  | 0.94314400  | 3.43488200  | -1.60919900 |
| O  | 0.87116100  | 3.09878200  | 0.42435500  |
| Cl | 2.44243300  | -2.75078200 | 0.17594300  |

(S)-TS1<sub>P</sub>-Cl

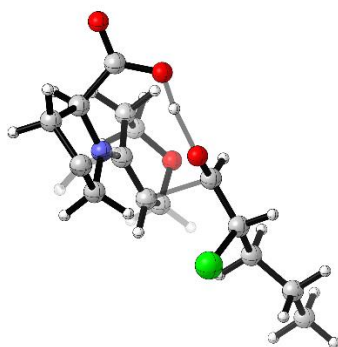

-----  
 - Thermochemistry -  
 -----

Zero-point correction=  
 Thermal correction to Energy=  
 Thermal correction to Enthalpy=

0.385331 (Hartree/Particle)  
 0.403019  
 0.403884

|                                              |              |
|----------------------------------------------|--------------|
| Thermal correction to Gibbs Free Energy=     | 0.341063     |
| Sum of electronic and zero-point Energies=   | -1401.114733 |
| Sum of electronic and thermal Energies=      | -1401.097045 |
| Sum of electronic and thermal Enthalpies=    | -1401.096180 |
| Sum of electronic and thermal Free Energies= | -1401.159001 |

Number of Imaginary Frequencies = 1

E (Single Point Energy) [IEFPCM(DCM)M06-2X/6-311++G(2d,2p)] = -1401.791734

|   |             |             |             |
|---|-------------|-------------|-------------|
| C | 0.44342800  | 0.86301500  | -0.97364200 |
| H | 0.79525700  | 0.06742600  | -1.62652000 |
| C | -0.91873400 | 0.94483300  | -0.68591000 |
| N | -1.73418800 | -0.10922900 | -0.78732200 |
| C | -3.14459600 | -0.11356900 | -0.38357500 |
| H | -3.67814500 | 0.74205600  | -0.80356500 |
| C | -1.34989400 | -1.36895900 | -1.45054400 |
| H | -0.36379500 | -1.68504200 | -1.11665900 |
| H | -1.33662600 | -1.21045400 | -2.53708200 |
| C | -2.45303000 | -2.33158200 | -1.02853400 |
| H | -2.22599500 | -2.73495000 | -0.03590300 |
| H | -2.56421400 | -3.16400900 | -1.72485800 |
| C | -3.68738400 | -1.43012000 | -0.97554000 |
| H | -4.05791100 | -1.23695300 | -1.98622600 |
| H | -4.50863600 | -1.82944800 | -0.37890600 |
| C | -1.45677300 | 2.18714900  | -0.01491200 |
| H | -2.48939300 | 2.37956900  | -0.31701100 |
| H | -1.46368200 | 2.01657300  | 1.07080300  |
| C | 0.86351200  | -0.14971200 | 0.93989700  |
| H | 0.96432500  | 0.84399000  | 1.40550200  |
| C | 2.21276400  | -0.84093000 | 0.72624300  |
| O | -0.11405700 | -0.89203900 | 1.22192400  |

|    |             |             |             |
|----|-------------|-------------|-------------|
| C  | -3.38629100 | -0.05495500 | 1.13465600  |
| O  | -2.39758100 | -0.29716200 | 1.96001700  |
| O  | -4.51159500 | 0.19415400  | 1.52773500  |
| C  | 3.39051200  | 0.01049000  | 0.28371900  |
| H  | 3.31216900  | 0.22034100  | -0.78882300 |
| C  | 4.74444900  | -0.63509000 | 0.57823100  |
| H  | 4.81856500  | -0.83785500 | 1.65366600  |
| H  | 4.80476800  | -1.60277800 | 0.06810500  |
| H  | 2.43058400  | -1.26465600 | 1.71519900  |
| H  | 3.32768000  | 0.96868300  | 0.81763600  |
| C  | 5.90369400  | 0.25548200  | 0.13692600  |
| H  | 5.87360200  | 1.22125800  | 0.65177000  |
| H  | 6.86701200  | -0.21262800 | 0.35497400  |
| H  | 5.85908400  | 0.44776400  | -0.93996400 |
| H  | -1.45329400 | -0.49820300 | 1.56543700  |
| C  | -0.60145400 | 3.40811100  | -0.33105500 |
| C  | 1.22842300  | 2.16147400  | -1.04412700 |
| H  | -0.75379100 | 3.72191500  | -1.37443600 |
| H  | -0.86643500 | 4.23938100  | 0.32394000  |
| H  | 2.28220200  | 2.01015500  | -0.82019100 |
| H  | 1.16803500  | 2.58124000  | -2.06195000 |
| O  | 0.76617300  | 3.12383100  | -0.11515500 |
| Cl | 2.04250900  | -2.28722700 | -0.34299100 |

(S)-TS1<sub>P</sub>-Cl-P

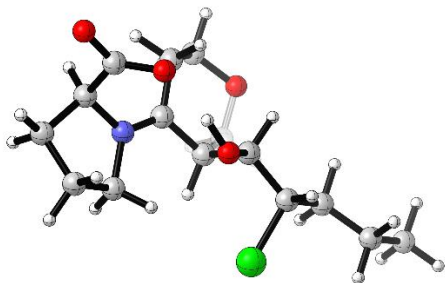

-----  
- Thermochemistry -  
-----

|                                              |                             |
|----------------------------------------------|-----------------------------|
| Zero-point correction=                       | 0.389760 (Hartree/Particle) |
| Thermal correction to Energy=                | 0.407413                    |
| Thermal correction to Enthalpy=              | 0.408278                    |
| Thermal correction to Gibbs Free Energy=     | 0.345083                    |
| Sum of electronic and zero-point Energies=   | -1401.143755                |
| Sum of electronic and thermal Energies=      | -1401.126102                |
| Sum of electronic and thermal Enthalpies=    | -1401.125237                |
| Sum of electronic and thermal Free Energies= | -1401.188431                |

Number of Imaginary Frequencies = 0

E (Single Point Energy) [IEFPCM(DCM)M06-2X/6-311++G(2d,2p)] = -1401.825061

|   |             |             |             |
|---|-------------|-------------|-------------|
| C | 0.44699100  | 0.52665400  | -0.71285200 |
| H | 0.58001000  | -0.26396500 | -1.45565600 |
| C | -1.01457200 | 0.81878100  | -0.51557700 |
| N | -1.90598500 | -0.08379000 | -0.74224000 |
| C | -3.32538400 | 0.03511100  | -0.33731900 |
| H | -3.74276100 | 0.97214700  | -0.70791400 |
| C | -1.62057700 | -1.45486400 | -1.26276500 |
| H | -0.71438800 | -1.84078700 | -0.79849700 |
| H | -1.48757600 | -1.37195100 | -2.34598500 |
| C | -2.87708400 | -2.24146200 | -0.90177900 |
| H | -2.78996700 | -2.63011500 | 0.11756200  |
| H | -3.02962400 | -3.08056600 | -1.58145500 |

|   |             |             |             |
|---|-------------|-------------|-------------|
| C | -3.98267000 | -1.18796100 | -0.97768400 |
| H | -4.24101900 | -0.97607900 | -2.01988900 |
| H | -4.88975600 | -1.45946200 | -0.43788900 |
| C | -1.35854700 | 2.14527500  | 0.09260700  |
| H | -2.41556300 | 2.38956900  | -0.01402900 |
| H | -1.15874100 | 2.04834700  | 1.16799500  |
| C | 0.98403800  | 0.01775900  | 0.67138700  |
| H | 1.15527800  | 0.90106000  | 1.30680500  |
| C | 2.32575400  | -0.72381600 | 0.60661800  |
| O | 0.09567300  | -0.88224500 | 1.28367800  |
| C | -3.45132200 | 0.02531500  | 1.22900400  |
| O | -2.38910200 | -0.04393900 | 1.90228000  |
| O | -4.62069900 | 0.09872400  | 1.63451000  |
| C | 3.56636100  | 0.07539400  | 0.22734400  |
| H | 3.60183300  | 0.22873000  | -0.85679600 |
| C | 4.86292500  | -0.59808900 | 0.67807300  |
| H | 4.83758100  | -0.72916000 | 1.76656700  |
| H | 4.92155400  | -1.60030700 | 0.23878200  |
| H | 2.45664400  | -1.15092700 | 1.60423900  |
| H | 3.49000900  | 1.06508200  | 0.69851700  |
| C | 6.09331900  | 0.21417200  | 0.28115300  |
| H | 6.06205200  | 1.21458700  | 0.72492600  |
| H | 7.01289600  | -0.27348100 | 0.61465700  |
| H | 6.14946100  | 0.33098700  | -0.80596000 |
| H | -0.77505800 | -0.48194900 | 1.52727200  |
| C | -0.48674500 | 3.26689600  | -0.47954300 |
| C | 1.15147600  | 1.79692900  | -1.22656700 |
| H | -0.76594000 | 3.48090300  | -1.52083900 |

|    |             |             |             |
|----|-------------|-------------|-------------|
| H  | -0.61976500 | 4.17286700  | 0.11200100  |
| H  | 2.23081700  | 1.66628300  | -1.23857500 |
| H  | 0.82336900  | 1.99513200  | -2.25730700 |
| O  | 0.88080200  | 2.91754300  | -0.41321000 |
| Cl | 2.17843400  | -2.17868400 | -0.47844300 |

(R)-TS1<sub>G</sub>-Cl-Pre

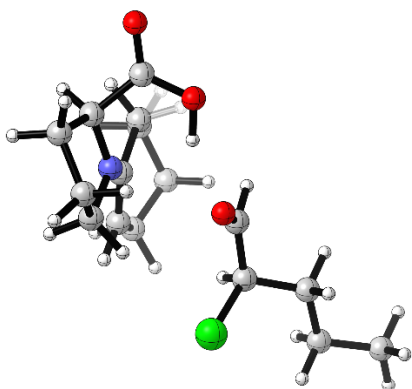

-----  
 - Thermochemistry -  
 -----

|                                              |                             |
|----------------------------------------------|-----------------------------|
| Zero-point correction=                       | 0.409291 (Hartree/Particle) |
| Thermal correction to Energy=                | 0.428788                    |
| Thermal correction to Enthalpy=              | 0.429653                    |
| Thermal correction to Gibbs Free Energy=     | 0.361196                    |
| Sum of electronic and zero-point Energies=   | -1365.215397                |
| Sum of electronic and thermal Energies=      | -1365.195900                |
| Sum of electronic and thermal Enthalpies=    | -1365.195035                |
| Sum of electronic and thermal Free Energies= | -1365.263491                |

Number of Imaginary Frequencies = 0

E (Single Point Energy) [IEFPCM(DCM)M06-2X/6-311++G(2d,2p)] = -1365.903561

|   |             |             |             |
|---|-------------|-------------|-------------|
| C | -0.16740300 | 1.27862100  | -1.50042600 |
| H | 0.05084400  | 0.53442300  | -2.26105600 |
| C | -1.17615400 | 1.06372100  | -0.62591000 |
| N | -1.87834800 | -0.14169000 | -0.58495800 |



|   |             |             |             |
|---|-------------|-------------|-------------|
| C | -3.23261200 | -0.23831900 | -0.04865900 |
| H | -3.84377200 | 0.64551300  | -0.25475100 |
| C | -1.62635200 | -1.17665800 | -1.58808100 |
| H | -0.58038100 | -1.49281700 | -1.54467100 |
| H | -1.83605200 | -0.79846000 | -2.60194300 |
| C | -2.60338700 | -2.27745700 | -1.19436800 |
| H | -2.19387600 | -2.85707000 | -0.35967100 |
| H | -2.81815700 | -2.96291300 | -2.01609100 |
| C | -3.83312800 | -1.47964200 | -0.75310500 |
| H | -4.39492400 | -1.14323700 | -1.62876200 |
| H | -4.51553800 | -2.03224500 | -0.10411100 |
| C | -1.53723900 | 2.07682300  | 0.44155400  |
| H | -2.62399700 | 2.19725800  | 0.49699800  |
| H | -1.22775600 | 1.68362700  | 1.42192300  |
| C | 0.57588700  | 3.29488200  | -0.18844700 |
| C | 1.07772000  | -0.47012400 | 0.80541600  |
| H | 0.89939400  | 0.40026500  | 1.46494700  |
| C | 2.36523500  | -0.37477600 | 0.02106600  |
| O | 0.32342900  | -1.41757600 | 0.80514000  |
| C | -3.25510900 | -0.43171000 | 1.46880000  |
| O | -2.15582200 | -0.92544500 | 2.03351600  |
| O | -4.24280700 | -0.19196700 | 2.12945500  |
| C | 3.55475000  | -0.53648000 | 0.97273600  |
| H | 3.39904200  | 0.15793700  | 1.80969700  |
| C | 4.90332900  | -0.24015200 | 0.31984000  |
| H | 5.06615800  | -0.93542300 | -0.51016400 |
| H | 4.87900000  | 0.76929900  | -0.10902800 |
| H | 2.39902800  | 0.61183000  | -0.45139400 |

|    |             |             |             |
|----|-------------|-------------|-------------|
| H  | 3.54165200  | -1.55151700 | 1.38751900  |
| C  | 6.04912600  | -0.35307900 | 1.32307500  |
| H  | 6.09680300  | -1.36086700 | 1.74765100  |
| H  | 7.01023000  | -0.14279200 | 0.84708300  |
| H  | 5.91900100  | 0.35379300  | 2.14873500  |
| H  | -1.42813600 | -1.03758400 | 1.38135800  |
| Cl | 2.39955500  | -1.58063100 | -1.30443200 |
| C  | -0.89300600 | 3.44318100  | 0.19907500  |
| C  | 0.68396800  | 2.52472700  | -1.50348700 |
| H  | -1.42466300 | 3.95482700  | -0.61325300 |
| H  | -1.00474500 | 4.06002400  | 1.09557700  |
| H  | 1.72962700  | 2.25980100  | -1.70895600 |
| H  | 0.38378900  | 3.18029000  | -2.33382300 |
| H  | 1.10721700  | 2.75224800  | 0.60701200  |
| H  | 1.05406300  | 4.27490000  | -0.28014600 |

**(R)-TS1<sub>G</sub>-Cl**

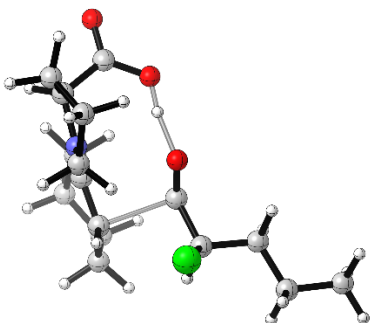

-----  
 - Thermochemistry -  
 -----

|                                            |                             |
|--------------------------------------------|-----------------------------|
| Zero-point correction=                     | 0.409354 (Hartree/Particle) |
| Thermal correction to Energy=              | 0.427259                    |
| Thermal correction to Enthalpy=            | 0.428124                    |
| Thermal correction to Gibbs Free Energy=   | 0.365060                    |
| Sum of electronic and zero-point Energies= | -1365.207715                |

|                                              |              |
|----------------------------------------------|--------------|
| Sum of electronic and thermal Energies=      | -1365.189810 |
| Sum of electronic and thermal Enthalpies=    | -1365.188945 |
| Sum of electronic and thermal Free Energies= | -1365.252009 |

Number of Imaginary Frequencies = 1

E (Single Point Energy) [IEFPCM<sub>(DCM)</sub>M06-2X/6-311++G(2d,2p)] = -1365.894619

|   |             |             |             |
|---|-------------|-------------|-------------|
| C | -0.02497100 | 1.27173900  | -1.14946500 |
| H | 0.29999900  | 0.62051000  | -1.95584500 |
| C | -1.26142500 | 1.01955300  | -0.56907500 |
| N | -1.86151600 | -0.17845700 | -0.69570800 |
| C | -3.09794100 | -0.56403300 | -0.01241300 |
| H | -3.87883700 | 0.18931000  | -0.13796100 |
| C | -1.42024300 | -1.20905700 | -1.65411200 |
| H | -0.34070300 | -1.33846700 | -1.60692600 |
| H | -1.70714300 | -0.90231700 | -2.66940100 |
| C | -2.17612700 | -2.45116500 | -1.19864100 |
| H | -1.63262600 | -2.92671300 | -0.37514600 |
| H | -2.29743600 | -3.18028600 | -2.00127500 |
| C | -3.50662000 | -1.87888200 | -0.70802100 |
| H | -4.15215200 | -1.64135200 | -1.55832700 |
| H | -4.05610400 | -2.53793300 | -0.03406900 |
| C | -1.87577700 | 2.01270500  | 0.39219600  |
| H | -2.96582300 | 1.95116200  | 0.35108800  |
| H | -1.58804800 | 1.72060200  | 1.41421900  |
| C | 0.08977600  | 3.53017300  | 0.01082600  |
| C | 0.99380400  | 0.09717000  | 0.44476200  |
| H | 0.92123700  | 0.96493200  | 1.12029900  |
| C | 2.37253000  | -0.01850200 | -0.18927800 |
| O | 0.33923500  | -0.94610500 | 0.68922600  |

|    |             |             |             |
|----|-------------|-------------|-------------|
| C  | -2.95543100 | -0.77058900 | 1.50419300  |
| O  | -1.76261800 | -0.94733400 | 2.02292800  |
| O  | -3.96411100 | -0.79560400 | 2.18598500  |
| C  | 3.37682500  | -0.41995700 | 0.89341800  |
| H  | 3.25789600  | 0.29280400  | 1.72110200  |
| C  | 4.83145300  | -0.40731000 | 0.42816800  |
| H  | 4.96054500  | -1.12951000 | -0.38472400 |
| H  | 5.06883800  | 0.58152500  | 0.01612900  |
| H  | 2.67243900  | 0.92673600  | -0.64343000 |
| H  | 3.10083900  | -1.40861700 | 1.27878000  |
| C  | 5.79052600  | -0.73771600 | 1.57021400  |
| H  | 5.57800300  | -1.72956300 | 1.98186300  |
| H  | 6.82866500  | -0.73085100 | 1.22798100  |
| H  | 5.69812100  | -0.01040700 | 2.38325500  |
| H  | -0.93945700 | -0.90998000 | 1.39077900  |
| Cl | 2.37214700  | -1.23310900 | -1.52463800 |
| C  | -1.42857800 | 3.44947500  | 0.12012700  |
| C  | 0.57695300  | 2.66177200  | -1.14921100 |
| H  | -1.88093000 | 3.79826000  | -0.81655100 |
| H  | -1.80088000 | 4.09640300  | 0.91939500  |
| H  | 1.67138000  | 2.59980000  | -1.13601300 |
| H  | 0.32721200  | 3.15740300  | -2.09768800 |
| H  | 0.53852800  | 3.19398300  | 0.95468000  |
| H  | 0.41197400  | 4.56470700  | -0.14064900 |

(R)-TS1<sub>G</sub>-Cl-P

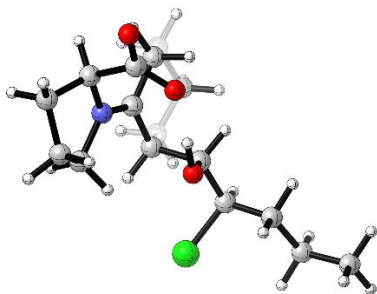

-----  
- Thermochemistry -  
-----

|                                              |                             |
|----------------------------------------------|-----------------------------|
| Zero-point correction=                       | 0.413433 (Hartree/Particle) |
| Thermal correction to Energy=                | 0.431419                    |
| Thermal correction to Enthalpy=              | 0.432284                    |
| Thermal correction to Gibbs Free Energy=     | 0.368557                    |
| Sum of electronic and zero-point Energies=   | -1365.237484                |
| Sum of electronic and thermal Energies=      | -1365.219499                |
| Sum of electronic and thermal Enthalpies=    | -1365.218634                |
| Sum of electronic and thermal Free Energies= | -1365.282361                |

Number of Imaginary Frequencies = 0

E (Single Point Energy) [IEFPCM<sub>(DCM)</sub>M06-2X/6-311++G(2d,2p)] = -1365.927951

|   |             |             |             |
|---|-------------|-------------|-------------|
| C | 0.16577300  | 1.02418400  | -0.76361800 |
| H | 0.21054600  | 0.53565700  | -1.73739600 |
| C | -1.23100500 | 0.95862900  | -0.21316700 |
| N | -2.06197800 | 0.06616100  | -0.63727500 |
| C | -3.31994600 | -0.28482900 | 0.05905400  |
| H | -3.90580000 | 0.61075800  | 0.26562600  |
| C | -1.80368400 | -0.89248900 | -1.75663500 |
| H | -0.78448400 | -1.26690600 | -1.69329700 |
| H | -1.95172900 | -0.34511300 | -2.69255000 |
| C | -2.85775400 | -1.97801600 | -1.55721500 |
| H | -2.47775100 | -2.74174900 | -0.87169300 |

|    |             |             |             |
|----|-------------|-------------|-------------|
| H  | -3.11583400 | -2.45849200 | -2.50172400 |
| C  | -4.02443300 | -1.22395200 | -0.91930500 |
| H  | -4.56708200 | -0.64492000 | -1.67312800 |
| H  | -4.73051700 | -1.86585300 | -0.39249400 |
| C  | -1.55530600 | 1.85906600  | 0.94405300  |
| H  | -2.62205900 | 1.86185700  | 1.16401300  |
| H  | -1.06199100 | 1.41359300  | 1.81908800  |
| C  | 0.43420200  | 3.31278800  | 0.34180900  |
| C  | 1.02292600  | 0.15778500  | 0.21987500  |
| H  | 1.00995000  | 0.63305300  | 1.21377300  |
| C  | 2.50089100  | 0.10552100  | -0.16372400 |
| O  | 0.52658900  | -1.15162400 | 0.29919800  |
| C  | -2.99096600 | -0.99082500 | 1.42339100  |
| O  | -1.77698800 | -1.14932500 | 1.72335800  |
| O  | -3.99527100 | -1.31970900 | 2.07259100  |
| C  | 3.30516300  | -0.79057900 | 0.76767600  |
| H  | 3.05272600  | -0.48704500 | 1.79338100  |
| C  | 4.81643800  | -0.69418800 | 0.57121500  |
| H  | 5.07310500  | -1.00232100 | -0.44810500 |
| H  | 5.12967400  | 0.35267100  | 0.67387300  |
| H  | 2.91355300  | 1.11718100  | -0.15547100 |
| H  | 2.96243400  | -1.82346600 | 0.65131600  |
| C  | 5.57280300  | -1.56073300 | 1.57634800  |
| H  | 5.28766600  | -2.61275100 | 1.47412000  |
| H  | 6.65344700  | -1.48880100 | 1.42759700  |
| H  | 5.35211800  | -1.25294900 | 2.60364400  |
| H  | -0.30175200 | -1.17323600 | 0.83866900  |
| Cl | 2.68903400  | -0.45911400 | -1.88529900 |

|   |             |            |             |
|---|-------------|------------|-------------|
| C | -1.04199100 | 3.29229100 | 0.73106300  |
| C | 0.64530200  | 2.47787300 | -0.91990600 |
| H | -1.63299000 | 3.77503100 | -0.05645800 |
| H | -1.21423300 | 3.85543000 | 1.65177000  |
| H | 1.69200100  | 2.47887100 | -1.23631200 |
| H | 0.07962600  | 2.93097800 | -1.74293700 |
| H | 1.04553800  | 2.92914700 | 1.16852600  |
| H | 0.75899200  | 4.34129000 | 0.16051600  |

(S)-TS1<sub>G</sub>-Cl-Pre

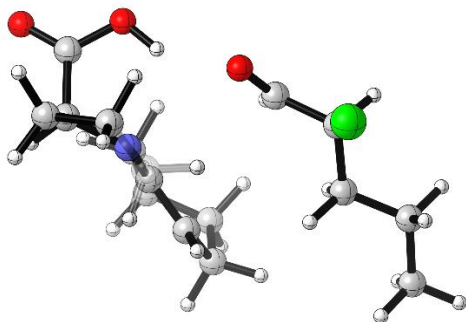

-----  
- Thermochemistry -  
-----

|                                              |                             |
|----------------------------------------------|-----------------------------|
| Zero-point correction=                       | 0.409146 (Hartree/Particle) |
| Thermal correction to Energy=                | 0.428587                    |
| Thermal correction to Enthalpy=              | 0.429452                    |
| Thermal correction to Gibbs Free Energy=     | 0.361683                    |
| Sum of electronic and zero-point Energies=   | -1365.215109                |
| Sum of electronic and thermal Energies=      | -1365.195668                |
| Sum of electronic and thermal Enthalpies=    | -1365.194803                |
| Sum of electronic and thermal Free Energies= | -1365.262572                |

Number of Imaginary Frequencies = 0

E (Single Point Energy) [IEFPCM(DCM)M06-2X/6-311++G(2d,2p)] = -1365.902931

|   |            |            |             |
|---|------------|------------|-------------|
| C | 0.26134200 | 1.44482700 | -1.19536100 |
| H | 0.58501000 | 0.77357100 | -1.98586300 |

|   |             |             |             |
|---|-------------|-------------|-------------|
| C | -0.87412200 | 1.17400400  | -0.51747100 |
| N | -1.59481100 | -0.01243900 | -0.70220200 |
| C | -3.05221400 | -0.03911300 | -0.58171000 |
| H | -3.52686100 | 0.88937600  | -0.91596300 |
| C | -1.13344200 | -1.00375700 | -1.67220600 |
| H | -0.14208200 | -1.37145900 | -1.38726300 |
| H | -1.06737400 | -0.57212900 | -2.68431600 |
| C | -2.21914300 | -2.06987300 | -1.60682400 |
| H | -2.07440700 | -2.69366600 | -0.71794500 |
| H | -2.22915100 | -2.71670600 | -2.48588700 |
| C | -3.48854600 | -1.22282800 | -1.48090700 |
| H | -3.77348200 | -0.82959100 | -2.46058600 |
| H | -4.34582700 | -1.75933700 | -1.06922000 |
| C | -1.39078300 | 2.08868700  | 0.57414500  |
| H | -2.47501700 | 2.21648500  | 0.48245700  |
| H | -1.22610100 | 1.60092300  | 1.54696200  |
| C | 0.95845000  | -0.82179400 | 1.36218700  |
| H | 0.86218700  | 0.17797000  | 1.82570000  |
| C | 2.38171600  | -1.18983000 | 1.00603100  |
| O | -0.00542900 | -1.53563600 | 1.20749200  |
| C | -3.52467300 | -0.27152900 | 0.85377800  |
| O | -2.65583200 | -0.82601400 | 1.69318900  |
| O | -4.65494100 | -0.00765600 | 1.20522900  |
| C | 3.06349500  | -0.08023900 | 0.20864000  |
| H | 2.59632500  | -0.01974800 | -0.78132200 |
| C | 4.57480400  | -0.24888100 | 0.07831100  |
| H | 5.01698000  | -0.31975700 | 1.07966800  |
| H | 4.79408300  | -1.19139400 | -0.43443500 |



|    |             |             |             |
|----|-------------|-------------|-------------|
| H  | 2.90906400  | -1.33601500 | 1.95753700  |
| H  | 2.84741100  | 0.86780500  | 0.72158000  |
| C  | 5.19926400  | 0.91603300  | -0.68674900 |
| H  | 5.01163200  | 1.86605900  | -0.17541300 |
| H  | 6.28097800  | 0.79209500  | -0.78148600 |
| H  | 4.77878700  | 0.98903600  | -1.69514100 |
| H  | -1.77345900 | -0.94450600 | 1.27398600  |
| C  | -0.71663500 | 3.46139200  | 0.55773200  |
| C  | 1.11254000  | 2.66593300  | -0.94607300 |
| H  | -1.11062400 | 4.04960500  | -0.28091400 |
| H  | -0.96807100 | 4.00047000  | 1.47591200  |
| H  | 2.17461400  | 2.39574900  | -0.99852100 |
| H  | 0.95320900  | 3.39729300  | -1.75173400 |
| Cl | 2.43766300  | -2.76162200 | 0.14790900  |
| C  | 0.79487100  | 3.31963900  | 0.39769900  |
| H  | 1.28746500  | 4.29402100  | 0.47322300  |
| H  | 1.18619700  | 2.69692900  | 1.21533200  |

(S)-TS1<sub>G</sub>-Cl

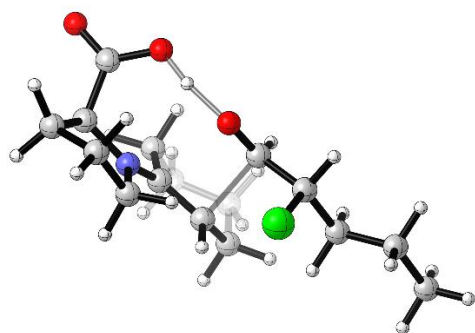

-----  
 - Thermochemistry -  
 -----

Zero-point correction=

0.409269 (Hartree/Particle)

|                                              |              |
|----------------------------------------------|--------------|
| Thermal correction to Energy=                | 0.427110     |
| Thermal correction to Enthalpy=              | 0.427975     |
| Thermal correction to Gibbs Free Energy=     | 0.364994     |
| Sum of electronic and zero-point Energies=   | -1365.201698 |
| Sum of electronic and thermal Energies=      | -1365.183858 |
| Sum of electronic and thermal Enthalpies=    | -1365.182993 |
| Sum of electronic and thermal Free Energies= | -1365.245974 |

Number of Imaginary Frequencies = 1

E (Single Point Energy) [IEFPCM<sub>(DCM)</sub>M06-2X/6-311++G(2d,2p)] = -1365.888191

|   |             |             |             |
|---|-------------|-------------|-------------|
| C | 0.43962000  | 0.86969500  | -0.97787000 |
| H | 0.76146100  | 0.04701800  | -1.61280700 |
| C | -0.91952600 | 0.95328600  | -0.67007700 |
| N | -1.73219200 | -0.10823900 | -0.77862900 |
| C | -3.14173500 | -0.12580700 | -0.37203800 |
| H | -3.68552400 | 0.72438800  | -0.78953700 |
| C | -1.34851900 | -1.35734000 | -1.46220600 |
| H | -0.35766300 | -1.67504800 | -1.14647600 |
| H | -1.35027300 | -1.18635300 | -2.54730600 |
| C | -2.43725400 | -2.33410900 | -1.03720100 |
| H | -2.19444400 | -2.74220800 | -0.05019300 |
| H | -2.54793200 | -3.16236700 | -1.73876100 |
| C | -3.67893900 | -1.44531000 | -0.96326500 |
| H | -4.06449800 | -1.25091300 | -1.96812400 |
| H | -4.48906900 | -1.85603300 | -0.35887800 |
| C | -1.47677000 | 2.18431300  | 0.01254500  |
| H | -2.53620800 | 2.30368900  | -0.22387700 |
| H | -1.42074300 | 2.01199800  | 1.09867200  |
| C | 0.85571600  | -0.19809700 | 0.93318500  |
| H | 0.95568900  | 0.77710100  | 1.43517700  |
| C | 2.20834300  | -0.87718500 | 0.71020000  |

|    |             |             |             |
|----|-------------|-------------|-------------|
| O  | -0.12203400 | -0.94789100 | 1.19233700  |
| C  | -3.37905800 | -0.07053900 | 1.14611700  |
| O  | -2.39023600 | -0.33493600 | 1.96511100  |
| O  | -4.49858700 | 0.19285900  | 1.54743900  |
| C  | 3.38178600  | -0.00814400 | 0.29183100  |
| H  | 3.32111100  | 0.19678400  | -0.78207700 |
| C  | 4.73788600  | -0.63330200 | 0.61779400  |
| H  | 4.79627500  | -0.82240600 | 1.69673700  |
| H  | 4.81775800  | -1.60650500 | 0.12053200  |
| H  | 2.42376100  | -1.32188400 | 1.69055800  |
| H  | 3.29158600  | 0.95273800  | 0.81764300  |
| C  | 5.89447800  | 0.26493200  | 0.18520400  |
| H  | 5.84371100  | 1.23701000  | 0.68656400  |
| H  | 6.85938600  | -0.18832100 | 0.42649200  |
| H  | 5.86665700  | 0.44264500  | -0.89474300 |
| H  | -1.45311400 | -0.54357500 | 1.55792900  |
| C  | -0.72161900 | 3.46521500  | -0.34045900 |
| C  | 1.25298700  | 2.14877100  | -1.10750900 |
| H  | -0.94012100 | 3.74228200  | -1.37925300 |
| H  | -1.08533600 | 4.27829400  | 0.29415100  |
| H  | 2.31198300  | 1.95259000  | -0.94112800 |
| H  | 1.17821900  | 2.50356800  | -2.14586700 |
| Cl | 2.05327600  | -2.30188500 | -0.39000500 |
| C  | 0.77935900  | 3.26333600  | -0.17769100 |
| H  | 1.32017100  | 4.18767100  | -0.40259400 |
| H  | 1.00313700  | 3.00900700  | 0.86720600  |

(S)-TS1G-Cl-P

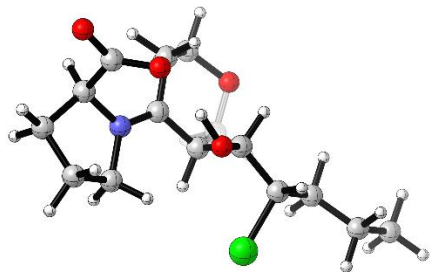

-----  
- Thermochemistry -  
-----

|                                              |                             |
|----------------------------------------------|-----------------------------|
| Zero-point correction=                       | 0.413725 (Hartree/Particle) |
| Thermal correction to Energy=                | 0.431652                    |
| Thermal correction to Enthalpy=              | 0.432517                    |
| Thermal correction to Gibbs Free Energy=     | 0.369188                    |
| Sum of electronic and zero-point Energies=   | -1365.232950                |
| Sum of electronic and thermal Energies=      | -1365.215023                |
| Sum of electronic and thermal Enthalpies=    | -1365.214158                |
| Sum of electronic and thermal Free Energies= | -1365.277488                |

Number of Imaginary Frequencies = 0

E (Single Point Energy) [IEFPCM(DCM)M06-2X/6-311++G(2d,2p)] = -1365.923664

|   |             |             |             |
|---|-------------|-------------|-------------|
| C | 0.33703900  | 0.18028900  | -0.87230900 |
| H | 0.26887000  | -0.71546700 | -1.48971700 |
| C | -1.03974500 | 0.70547200  | -0.56662800 |
| N | -2.07803900 | -0.05154000 | -0.68717200 |
| C | -3.40315900 | 0.27472800  | -0.11401000 |
| H | -3.71507600 | 1.27431700  | -0.41633100 |
| C | -2.07332700 | -1.45084700 | -1.21704400 |
| H | -1.20461500 | -1.98481800 | -0.83941500 |
| H | -2.03506200 | -1.38382000 | -2.30847900 |
| C | -3.39706500 | -2.03065200 | -0.72656900 |
| H | -3.26826100 | -2.45213500 | 0.27514300  |
| H | -3.75499300 | -2.81878300 | -1.39010200 |

|   |             |             |             |
|---|-------------|-------------|-------------|
| C | -4.31846400 | -0.81220200 | -0.67603800 |
| H | -4.65371100 | -0.54045100 | -1.68190600 |
| H | -5.19166200 | -0.94477400 | -0.03720900 |
| C | -1.12623000 | 2.09082200  | 0.00740500  |
| H | -2.15593800 | 2.44034700  | 0.06491300  |
| H | -0.76949000 | 2.01390900  | 1.04357900  |
| C | 0.90297100  | -0.27743900 | 0.51327100  |
| H | 0.96399800  | 0.59067100  | 1.18614700  |
| C | 2.32025600  | -0.86968900 | 0.49158200  |
| O | 0.05565000  | -1.25704900 | 1.06905700  |
| C | -3.32337000 | 0.22765700  | 1.45466900  |
| O | -2.21020100 | -0.05218000 | 1.97503200  |
| O | -4.39807800 | 0.48265000  | 2.01892300  |
| C | 3.46625400  | 0.13163400  | 0.58737500  |
| H | 3.52809600  | 0.75387200  | -0.31096700 |
| C | 4.82446000  | -0.51660400 | 0.85351000  |
| H | 4.75165300  | -1.14801300 | 1.74770100  |
| H | 5.08406900  | -1.17728200 | 0.01969000  |
| H | 2.36140200  | -1.53715400 | 1.35570400  |
| H | 3.22457300  | 0.80238600  | 1.42345500  |
| C | 5.92097200  | 0.52938900  | 1.04380500  |
| H | 5.69577700  | 1.18451000  | 1.89159200  |
| H | 6.88891100  | 0.05734200  | 1.23082100  |
| H | 6.01963300  | 1.15690800  | 0.15198800  |
| H | -0.76620700 | -0.83890500 | 1.42385400  |
| C | -0.25534000 | 3.09434200  | -0.76745300 |
| C | 1.16411300  | 1.23199500  | -1.63048400 |
| H | -0.69684100 | 3.26839800  | -1.75601600 |

|    |             |             |             |
|----|-------------|-------------|-------------|
| H  | -0.27859900 | 4.04753800  | -0.23332200 |
| H  | 2.16959800  | 0.84110400  | -1.79867300 |
| H  | 0.71708500  | 1.35080200  | -2.62529800 |
| Cl | 2.54727400  | -1.98166900 | -0.93112300 |
| C  | 1.17698000  | 2.59063900  | -0.93352500 |
| H  | 1.75826300  | 3.30412500  | -1.52479000 |
| H  | 1.66410000  | 2.51994900  | 0.04748400  |

(R)-TS1<sub>o</sub>-Cl-Pre

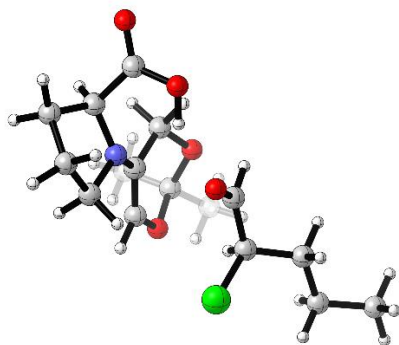

-----  
- Thermochemistry -  
-----

|                                              |                             |
|----------------------------------------------|-----------------------------|
| Zero-point correction=                       | 0.416833 (Hartree/Particle) |
| Thermal correction to Energy=                | 0.438270                    |
| Thermal correction to Enthalpy=              | 0.439135                    |
| Thermal correction to Gibbs Free Energy=     | 0.367316                    |
| Sum of electronic and zero-point Energies=   | -1515.595407                |
| Sum of electronic and thermal Energies=      | -1515.573970                |
| Sum of electronic and thermal Enthalpies=    | -1515.573105                |
| Sum of electronic and thermal Free Energies= | -1515.644924                |

Number of Imaginary Frequencies = 0

E (Single Point Energy) [IEFPCM(DCM)M06-2X/6-311++G(2d,2p)] = -1516.338860

|   |             |            |             |
|---|-------------|------------|-------------|
| C | -0.07822600 | 0.98047700 | -1.32356900 |
| H | 0.03153800  | 0.38575100 | -2.22177600 |
| C | -1.04756200 | 0.80339500 | -0.40757200 |

|   |             |             |             |
|---|-------------|-------------|-------------|
| N | -2.00395600 | -0.20974100 | -0.49395500 |
| C | -3.32924600 | -0.03225200 | 0.09839700  |
| H | -3.62015300 | 1.01935400  | 0.19225800  |
| C | -2.06687600 | -1.02106800 | -1.71107500 |
| H | -1.17159300 | -1.64734700 | -1.78568900 |
| H | -2.12220200 | -0.37757000 | -2.60438400 |
| C | -3.35808200 | -1.81167600 | -1.52972300 |
| H | -3.18736700 | -2.66701900 | -0.86700200 |
| H | -3.75527300 | -2.18362400 | -2.47548800 |
| C | -4.27721800 | -0.78215000 | -0.86473000 |
| H | -4.64813400 | -0.07438700 | -1.61128700 |
| H | -5.13400200 | -1.21418800 | -0.34470700 |
| C | -1.02187400 | 1.63909800  | 0.84853500  |
| H | -1.79819600 | 2.41734800  | 0.84528800  |
| H | -1.18619000 | 1.01165300  | 1.73152000  |
| O | 0.94531600  | 1.88788600  | -1.17750300 |
| O | 0.26458800  | 2.21301500  | 1.01703400  |
| C | 0.76084000  | 2.85699900  | -0.14263500 |
| C | 2.13890900  | 3.37058500  | 0.21192300  |
| H | 2.61949200  | 3.78116400  | -0.67820400 |
| H | 2.05885800  | 4.15178800  | 0.97066200  |
| C | -0.17237800 | 3.95669100  | -0.63707200 |
| H | 0.32613700  | 4.51866600  | -1.42943100 |
| H | -0.40931700 | 4.63532000  | 0.18633200  |
| H | -1.09938900 | 3.54549100  | -1.04327600 |
| C | 0.87837800  | -1.12508900 | 0.76081500  |
| H | 0.77277800  | -0.37923500 | 1.57227000  |
| C | 2.15859600  | -0.95706400 | -0.02126500 |

|    |             |             |             |
|----|-------------|-------------|-------------|
| O  | 0.05059200  | -1.99348300 | 0.59292200  |
| C  | -3.41955700 | -0.63776300 | 1.50367200  |
| O  | -2.43275500 | -1.44704100 | 1.87947400  |
| O  | -4.36200600 | -0.41562700 | 2.23191100  |
| H  | 2.74419800  | 2.54843100  | 0.60238200  |
| C  | 3.36049700  | -1.28680900 | 0.86844000  |
| H  | 3.23523800  | -0.72650300 | 1.80531000  |
| C  | 4.70164800  | -0.91500200 | 0.23925300  |
| H  | 4.82997100  | -1.46785700 | -0.69721100 |
| H  | 4.69072300  | 0.15135300  | -0.01888500 |
| H  | 3.33597700  | -2.35318200 | 1.12325000  |
| C  | 5.86698700  | -1.21192400 | 1.18037200  |
| H  | 5.77067800  | -0.64897500 | 2.11433200  |
| H  | 5.90277800  | -2.27665000 | 1.43209800  |
| H  | 6.82160300  | -0.94274900 | 0.72113500  |
| H  | -1.73572600 | -1.50865900 | 1.18769600  |
| H  | 2.21057700  | 0.08908700  | -0.34525600 |
| Cl | 2.13234100  | -1.95505700 | -1.51162100 |

**(R)-TS1<sub>0</sub>-Cl**

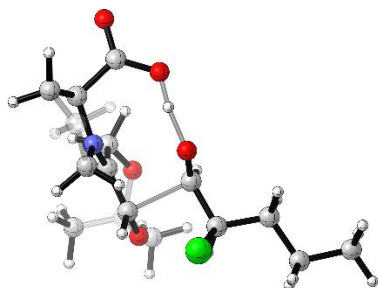

-----  
 - Thermochemistry -  
 -----

Zero-point correction=  
 Thermal correction to Energy=

0.415898 (Hartree/Particle)  
 0.435797



|                                              |              |
|----------------------------------------------|--------------|
| Thermal correction to Enthalpy=              | 0.436662     |
| Thermal correction to Gibbs Free Energy=     | 0.369496     |
| Sum of electronic and zero-point Energies=   | -1515.585898 |
| Sum of electronic and thermal Energies=      | -1515.565999 |
| Sum of electronic and thermal Enthalpies=    | -1515.565134 |
| Sum of electronic and thermal Free Energies= | -1515.632299 |

Number of Imaginary Frequencies = 1

E (Single Point Energy) [IEFPCM(DCM)M06-2X/6-311++G(2d,2p)] = -1516.327244

|   |             |             |             |
|---|-------------|-------------|-------------|
| C | 0.07380400  | 0.93626500  | -0.94021000 |
| H | 0.33080000  | 0.42941900  | -1.86404000 |
| C | -1.17196800 | 0.76942500  | -0.35005500 |
| N | -1.92941200 | -0.29760500 | -0.60604100 |
| C | -3.16688000 | -0.61449600 | 0.10944400  |
| H | -3.77960200 | 0.28046700  | 0.25090100  |
| C | -1.68503900 | -1.20785200 | -1.74285300 |
| H | -0.64926100 | -1.55001300 | -1.73889200 |
| H | -1.89138600 | -0.66947100 | -2.67728400 |
| C | -2.68367500 | -2.33571400 | -1.49676300 |
| H | -2.24637300 | -3.07323100 | -0.81557200 |
| H | -2.96456800 | -2.84318800 | -2.42048300 |
| C | -3.85994700 | -1.61944200 | -0.82776600 |
| H | -4.44253600 | -1.06912700 | -1.57209000 |
| H | -4.53139100 | -2.28032900 | -0.27875600 |
| C | -1.57710300 | 1.71079900  | 0.75660400  |
| H | -2.48413700 | 2.26063000  | 0.46612400  |
| H | -1.79570900 | 1.15547700  | 1.67474900  |
| O | 0.81359500  | 2.08744800  | -0.74421500 |
| O | -0.51884700 | 2.58761500  | 1.07882000  |
| C | 0.14808300  | 3.13982000  | -0.04275700 |
| C | 1.23106000  | 4.04145400  | 0.50541700  |

|    |             |             |             |
|----|-------------|-------------|-------------|
| H  | 1.85377600  | 4.40748800  | -0.31314900 |
| H  | 0.77870800  | 4.89109900  | 1.02079100  |
| C  | -0.80711000 | 3.86686700  | -0.98369100 |
| H  | -0.22562200 | 4.39845700  | -1.73942900 |
| H  | -1.40115600 | 4.58935600  | -0.41823300 |
| H  | -1.48123900 | 3.17855000  | -1.49953800 |
| C  | 0.92567200  | -0.41585400 | 0.42134800  |
| H  | 0.89290400  | 0.34314400  | 1.22250500  |
| C  | 2.30604900  | -0.47854500 | -0.21863800 |
| O  | 0.25017700  | -1.48275700 | 0.52983500  |
| C  | -2.96595700 | -1.21813200 | 1.51493300  |
| O  | -1.76740400 | -1.55204900 | 1.91315300  |
| O  | -3.95430300 | -1.36196900 | 2.21366500  |
| H  | 1.84952200  | 3.47831200  | 1.20773600  |
| C  | 3.29837900  | -1.06535100 | 0.78493300  |
| H  | 3.20811300  | -0.47249000 | 1.70557700  |
| C  | 4.75062100  | -1.03725600 | 0.31261400  |
| H  | 4.85039100  | -1.64110200 | -0.59543300 |
| H  | 5.02085100  | -0.00884500 | 0.04196600  |
| H  | 2.98957900  | -2.08848000 | 1.02989700  |
| C  | 5.70268300  | -1.55900400 | 1.38711900  |
| H  | 5.64078700  | -0.95072700 | 2.29526100  |
| H  | 5.45603900  | -2.59079700 | 1.65737800  |
| H  | 6.73877500  | -1.54091000 | 1.03901100  |
| H  | -0.93592400 | -1.46797600 | 1.25064800  |
| H  | 2.61985700  | 0.51988600  | -0.53057000 |
| Cl | 2.25923100  | -1.48862200 | -1.71911300 |

(R)-TS1<sub>o</sub>-Cl-P

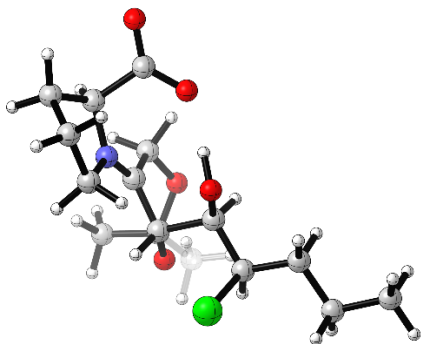

-----  
- Thermochemistry -  
-----

|                                              |                             |
|----------------------------------------------|-----------------------------|
| Zero-point correction=                       | 0.419814 (Hartree/Particle) |
| Thermal correction to Energy=                | 0.439965                    |
| Thermal correction to Enthalpy=              | 0.440830                    |
| Thermal correction to Gibbs Free Energy=     | 0.372133                    |
| Sum of electronic and zero-point Energies=   | -1515.609173                |
| Sum of electronic and thermal Energies=      | -1515.589022                |
| Sum of electronic and thermal Enthalpies=    | -1515.588157                |
| Sum of electronic and thermal Free Energies= | -1515.656854                |

Number of Imaginary Frequencies = 0

E (Single Point Energy) [IEFPCM(DCM)M06-2X/6-311++G(2d,2p)] = -1516.354000

|   |             |             |             |
|---|-------------|-------------|-------------|
| C | 0.17745800  | 0.70838300  | -0.70155200 |
| H | 0.21378600  | 0.33326200  | -1.72718100 |
| C | -1.21963100 | 0.66624600  | -0.16093100 |
| N | -2.06779100 | -0.20564800 | -0.57214300 |
| C | -3.31472400 | -0.51731400 | 0.15266900  |
| H | -3.81285300 | 0.40611100  | 0.45746600  |
| C | -1.88023200 | -1.13474900 | -1.73033500 |
| H | -0.88957000 | -1.58395300 | -1.68399500 |
| H | -1.98663900 | -0.53404800 | -2.63873000 |
| C | -3.02107300 | -2.13786400 | -1.56814200 |
| H | -2.69703800 | -2.97039100 | -0.93630000 |

|   |             |             |             |
|---|-------------|-------------|-------------|
| H | -3.33465400 | -2.53810500 | -2.53268300 |
| C | -4.11407200 | -1.33093500 | -0.86239000 |
| H | -4.62178700 | -0.66546000 | -1.56724600 |
| H | -4.85620900 | -1.94753900 | -0.35627900 |
| C | -1.52856800 | 1.57948300  | 0.99378100  |
| H | -2.44667500 | 2.14765000  | 0.78943400  |
| H | -1.68326100 | 0.97577100  | 1.89407100  |
| O | 0.77401600  | 1.98749300  | -0.68753900 |
| O | -0.43212900 | 2.42728100  | 1.24355600  |
| C | 0.13126500  | 3.00956800  | 0.08070300  |
| C | 1.22427500  | 3.94106900  | 0.55540800  |
| H | 1.78273500  | 4.31813000  | -0.30334500 |
| H | 0.78642600  | 4.78161200  | 1.09773100  |
| C | -0.90999400 | 3.71570000  | -0.78273600 |
| H | -0.39485300 | 4.26064400  | -1.57584400 |
| H | -1.48313900 | 4.42285800  | -0.17763000 |
| H | -1.60142700 | 3.01578000  | -1.26082900 |
| C | 1.00379100  | -0.25103300 | 0.22739500  |
| H | 1.01471200  | 0.21614000  | 1.22558300  |
| C | 2.46072300  | -0.30972800 | -0.22433200 |
| O | 0.46511000  | -1.53761600 | 0.25915600  |
| C | -2.98234000 | -1.34780400 | 1.45375600  |
| O | -1.76769700 | -1.49011100 | 1.75716000  |
| O | -3.98546300 | -1.75685000 | 2.05103000  |
| H | 1.90129100  | 3.39436900  | 1.21541400  |
| C | 3.31403700  | -1.15381400 | 0.71081100  |
| H | 3.13852000  | -0.77238500 | 1.72646100  |
| C | 4.81006700  | -1.10304000 | 0.40848100  |

|    |             |             |             |
|----|-------------|-------------|-------------|
| H  | 4.99346800  | -1.49533600 | -0.59750700 |
| H  | 5.14353500  | -0.05755600 | 0.40643100  |
| H  | 2.94925000  | -2.18631200 | 0.69116500  |
| C  | 5.61908100  | -1.90254300 | 1.42806600  |
| H  | 5.47315300  | -1.50972700 | 2.43958400  |
| H  | 5.31178700  | -2.95331700 | 1.42996000  |
| H  | 6.68815400  | -1.86495700 | 1.20275900  |
| H  | -0.33352800 | -1.55923300 | 0.84277300  |
| H  | 2.84724700  | 0.70877600  | -0.29934500 |
| Cl | 2.54829700  | -0.97262200 | -1.91927900 |

(S)-TS1<sub>o</sub>-Cl-Pre

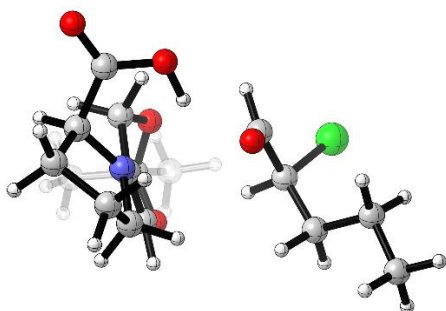

-----  
- Thermochemistry -  
-----

|                                              |                             |
|----------------------------------------------|-----------------------------|
| Zero-point correction=                       | 0.416527 (Hartree/Particle) |
| Thermal correction to Energy=                | 0.438072                    |
| Thermal correction to Enthalpy=              | 0.438937                    |
| Thermal correction to Gibbs Free Energy=     | 0.366549                    |
| Sum of electronic and zero-point Energies=   | -1515.594023                |
| Sum of electronic and thermal Energies=      | -1515.572478                |
| Sum of electronic and thermal Enthalpies=    | -1515.571613                |
| Sum of electronic and thermal Free Energies= | -1515.644002                |

Number of Imaginary Frequencies = 0

E (Single Point Energy) [IEFPCM(DCM)M06-2X/6-311++G(2d,2p)] = -1516.336956

|   |             |             |             |
|---|-------------|-------------|-------------|
| C | 0.30527400  | 0.75188600  | -1.27007500 |
| H | 0.41255200  | 0.06420900  | -2.09979600 |
| C | -0.75495300 | 0.78731200  | -0.44314000 |
| N | -1.85059700 | -0.07494400 | -0.55132800 |
| C | -3.18855300 | 0.40627200  | -0.20324000 |
| H | -3.29817000 | 1.49039700  | -0.31485100 |
| C | -1.90211900 | -1.00947300 | -1.67574300 |
| H | -1.11348300 | -1.76126000 | -1.56744400 |
| H | -1.75806900 | -0.48074200 | -2.63282700 |
| C | -3.31336000 | -1.57669500 | -1.57946300 |
| H | -3.35791800 | -2.34449000 | -0.79944800 |
| H | -3.65223400 | -2.01837700 | -2.51800000 |
| C | -4.12799100 | -0.34278100 | -1.17849500 |
| H | -4.30085800 | 0.29088300  | -2.05268500 |
| H | -5.09452100 | -0.57119800 | -0.72545800 |
| C | -0.72543700 | 1.72678700  | 0.73683700  |
| H | -1.41597000 | 2.57365100  | 0.61128600  |
| H | -1.01367600 | 1.19706600  | 1.65158600  |
| O | 1.40122300  | 1.56977600  | -1.13035900 |
| O | 0.59734600  | 2.18727300  | 0.95719300  |
| C | 1.24058900  | 2.65448200  | -0.21406500 |
| C | 2.63364300  | 3.07463600  | 0.20099800  |
| H | 3.22172500  | 3.32578400  | -0.68422100 |
| H | 3.11795800  | 2.25285000  | 0.73389400  |
| C | 0.46228100  | 3.77917600  | -0.88986100 |
| H | 0.23393700  | 4.55873500  | -0.15844300 |
| H | -0.46867400 | 3.41648400  | -1.33178300 |

|    |             |             |             |
|----|-------------|-------------|-------------|
| H  | 1.07298100  | 4.20740700  | -1.68736600 |
| C  | 0.57126600  | -1.55619100 | 1.23279300  |
| H  | 0.61284100  | -0.69957700 | 1.93291300  |
| C  | 1.92752900  | -2.01373500 | 0.73219500  |
| O  | -0.47940000 | -2.09130100 | 0.96117600  |
| C  | -3.56302300 | 0.07466200  | 1.24409800  |
| O  | -2.82524400 | -0.84350900 | 1.86143500  |
| O  | -4.51006100 | 0.59462300  | 1.79329900  |
| H  | 2.57770200  | 3.94721200  | 0.85531200  |
| C  | 2.91522000  | -0.86059500 | 0.60752400  |
| H  | 2.57071100  | -0.16637700 | -0.16664800 |
| C  | 4.35115000  | -1.29881100 | 0.33193700  |
| H  | 4.67683700  | -1.99295600 | 1.11690100  |
| H  | 4.38981400  | -1.84893400 | -0.61426700 |
| H  | 2.88224000  | -0.31265700 | 1.56031200  |
| C  | 5.29543900  | -0.09998200 | 0.26927800  |
| H  | 5.29360500  | 0.45092400  | 1.21583200  |
| H  | 6.32207800  | -0.41436600 | 0.06458100  |
| H  | 4.98984200  | 0.59253100  | -0.52222800 |
| H  | -2.08201600 | -1.14948700 | 1.29177600  |
| H  | 2.29482300  | -2.74214100 | 1.46731700  |
| Cl | 1.74161700  | -2.92103300 | -0.80696300 |

(S)-TS1o-Cl

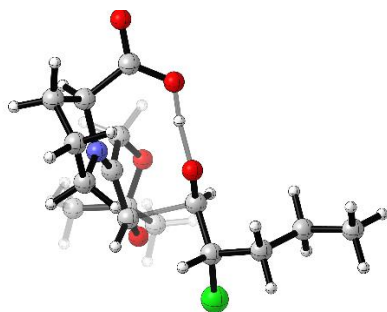

-----  
- Thermochemistry -  
-----

|                                              |                             |
|----------------------------------------------|-----------------------------|
| Zero-point correction=                       | 0.415626 (Hartree/Particle) |
| Thermal correction to Energy=                | 0.435516                    |
| Thermal correction to Enthalpy=              | 0.436381                    |
| Thermal correction to Gibbs Free Energy=     | 0.369358                    |
| Sum of electronic and zero-point Energies=   | -1515.582149                |
| Sum of electronic and thermal Energies=      | -1515.562258                |
| Sum of electronic and thermal Enthalpies=    | -1515.561393                |
| Sum of electronic and thermal Free Energies= | -1515.628417                |

Number of Imaginary Frequencies = 1

E (Single Point Energy) [IEFPCM(DCM)M06-2X/6-311++G(2d,2p)] = -1516.322975

|   |             |             |             |
|---|-------------|-------------|-------------|
| C | 0.45629400  | 0.48268000  | -0.75121600 |
| H | 0.70898300  | -0.25488700 | -1.50756100 |
| C | -0.86799000 | 0.77346700  | -0.44311300 |
| N | -1.85696000 | -0.08693400 | -0.68446200 |
| C | -3.24092100 | 0.11393700  | -0.24749000 |
| H | -3.55766300 | 1.14805800  | -0.41123500 |
| C | -1.71268600 | -1.25546600 | -1.57411300 |
| H | -0.84983000 | -1.85186600 | -1.27746700 |
| H | -1.57814500 | -0.89990100 | -2.60432900 |
| C | -3.03649500 | -1.99124600 | -1.38870400 |
| H | -2.97535000 | -2.64384100 | -0.51133700 |
| H | -3.29195800 | -2.60124900 | -2.25604900 |



|   |             |             |             |
|---|-------------|-------------|-------------|
| C | -4.03287600 | -0.85529800 | -1.14299700 |
| H | -4.27659500 | -0.35356000 | -2.08379000 |
| H | -4.96110900 | -1.17034700 | -0.66548400 |
| C | -1.16791200 | 2.00911700  | 0.37004200  |
| H | -1.82288200 | 2.68200100  | -0.20296900 |
| H | -1.68495500 | 1.74126500  | 1.29733600  |
| O | 1.43979000  | 1.44522300  | -0.59884800 |
| O | 0.02157100  | 2.65635000  | 0.76323700  |
| C | 0.99169600  | 2.75643800  | -0.26447400 |
| C | 2.18044900  | 3.47176200  | 0.33807400  |
| H | 3.00870300  | 3.47098100  | -0.37328900 |
| H | 2.48730900  | 2.95623100  | 1.25087300  |
| C | 0.44814900  | 3.45665600  | -1.50650000 |
| H | -0.01011500 | 4.40755200  | -1.22255300 |
| H | -0.29213100 | 2.84842900  | -2.03232200 |
| H | 1.27354400  | 3.65132100  | -2.19408600 |
| C | 0.63912700  | -0.77835600 | 0.95025200  |
| H | 0.81568200  | 0.11102400  | 1.57824800  |
| C | 1.93576800  | -1.52764400 | 0.63376100  |
| O | -0.40246500 | -1.48034200 | 1.11206400  |
| C | -3.49952700 | -0.17405300 | 1.24572200  |
| O | -2.54724600 | -0.68170900 | 1.98294200  |
| O | -4.60192800 | 0.09378800  | 1.69033800  |
| H | 1.91142500  | 4.50285200  | 0.57647600  |
| C | 3.18120900  | -0.70094500 | 0.35535900  |
| H | 3.12668700  | -0.26554800 | -0.64703100 |
| C | 4.47486100  | -1.49812200 | 0.51478000  |
| H | 4.52114000  | -1.91318100 | 1.52940000  |

|    |             |             |             |
|----|-------------|-------------|-------------|
| H  | 4.46743400  | -2.34983700 | -0.17478300 |
| H  | 3.17976500  | 0.14212200  | 1.05886600  |
| C  | 5.70629600  | -0.63370000 | 0.25268500  |
| H  | 5.74512200  | 0.21264800  | 0.94636400  |
| H  | 6.62793600  | -1.20942300 | 0.37158000  |
| H  | 5.68948200  | -0.23118900 | -0.76537100 |
| H  | -1.62689300 | -0.96151300 | 1.53486300  |
| H  | 2.10115400  | -2.13997100 | 1.52921400  |
| Cl | 1.66185600  | -2.74008600 | -0.68250600 |

(S)-TS1<sub>o</sub>-Cl-P

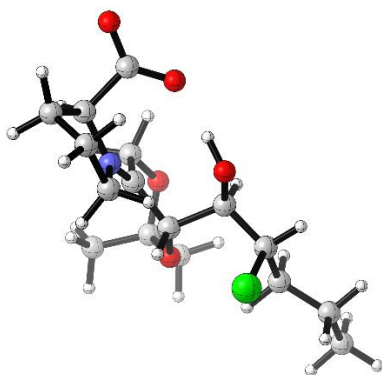

-----  
 - Thermochemistry -  
 -----

|                                              |                             |
|----------------------------------------------|-----------------------------|
| Zero-point correction=                       | 0.419984 (Hartree/Particle) |
| Thermal correction to Energy=                | 0.440008                    |
| Thermal correction to Enthalpy=              | 0.440873                    |
| Thermal correction to Gibbs Free Energy=     | 0.372586                    |
| Sum of electronic and zero-point Energies=   | -1515.606404                |
| Sum of electronic and thermal Energies=      | -1515.586381                |
| Sum of electronic and thermal Enthalpies=    | -1515.585516                |
| Sum of electronic and thermal Free Energies= | -1515.653803                |

Number of Imaginary Frequencies = 0

E (Single Point Energy) [IEFPCM(DCM)M06-2X/6-311++G(2d,2p)] = -1516.3513

|   |             |             |             |
|---|-------------|-------------|-------------|
| C | 0.36112900  | 0.18791000  | -0.56946000 |
| H | 0.38034600  | -0.43928800 | -1.46473500 |
| C | -1.03486900 | 0.66185200  | -0.28396400 |
| N | -2.06015900 | -0.02631000 | -0.63472900 |
| C | -3.41690300 | 0.22560200  | -0.11071300 |
| H | -3.63553000 | 1.29594400  | -0.13589600 |
| C | -2.04048200 | -1.25298800 | -1.49131200 |
| H | -1.24498500 | -1.91827700 | -1.15970200 |
| H | -1.85888100 | -0.91991100 | -2.51767200 |
| C | -3.44412500 | -1.82942300 | -1.31513600 |
| H | -3.46319500 | -2.50548400 | -0.45490100 |
| H | -3.75580200 | -2.38619100 | -2.19927700 |
| C | -4.30765800 | -0.59572800 | -1.03983600 |
| H | -4.50221200 | -0.04429200 | -1.96471000 |
| H | -5.25591400 | -0.82339400 | -0.55405200 |
| C | -1.17309000 | 1.90234600  | 0.55574200  |
| H | -1.84955800 | 2.61623500  | 0.06522500  |
| H | -1.59748500 | 1.62852100  | 1.52704700  |
| O | 1.29223700  | 1.23076800  | -0.76129300 |
| O | 0.09598000  | 2.46234900  | 0.79795700  |
| C | 0.91907000  | 2.54963900  | -0.35186100 |
| C | 2.19254100  | 3.24050700  | 0.08349200  |
| H | 2.92499900  | 3.20073700  | -0.72521900 |
| H | 2.59661400  | 2.73145800  | 0.96116400  |
| C | 0.23015100  | 3.26274500  | -1.51175800 |
| H | -0.15533100 | 4.23148100  | -1.18333400 |
| H | -0.59199600 | 2.67633400  | -1.93213000 |
| H | 0.96055500  | 3.42093600  | -2.30730100 |

|    |             |             |             |
|----|-------------|-------------|-------------|
| C  | 0.77482800  | -0.68080200 | 0.67123900  |
| H  | 0.90488300  | 0.01291000  | 1.51650000  |
| C  | 2.11824600  | -1.39244000 | 0.48206800  |
| O  | -0.18188400 | -1.66488700 | 0.94703800  |
| C  | -3.51285600 | -0.25813500 | 1.38915300  |
| O  | -2.44536100 | -0.61986200 | 1.95196400  |
| O  | -4.65730400 | -0.20336700 | 1.85565600  |
| H  | 1.98463200  | 4.28357800  | 0.33091600  |
| C  | 3.36064800  | -0.51490800 | 0.41762000  |
| H  | 3.37405500  | 0.05058700  | -0.51836100 |
| C  | 4.66054300  | -1.29961300 | 0.58763700  |
| H  | 4.62498700  | -1.86079500 | 1.52980800  |
| H  | 4.74986200  | -2.03799000 | -0.21685000 |
| H  | 3.27447900  | 0.22222600  | 1.22777300  |
| C  | 5.87923100  | -0.37903200 | 0.57909600  |
| H  | 5.82373000  | 0.35176500  | 1.39266300  |
| H  | 6.80599800  | -0.94629800 | 0.69879200  |
| H  | 5.94233200  | 0.17402800  | -0.36379000 |
| H  | -0.99020400 | -1.27408600 | 1.36289800  |
| H  | 2.19562100  | -2.08805000 | 1.32210400  |
| Cl | 2.03243200  | -2.47492500 | -0.98096900 |

(R)-TS1<sub>T</sub>-Cl-Pre

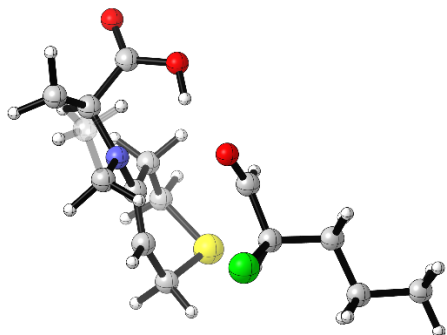

-----  
- Thermochemistry -  
-----

|                                              |                             |
|----------------------------------------------|-----------------------------|
| Zero-point correction=                       | 0.381900 (Hartree/Particle) |
| Thermal correction to Energy=                | 0.401652                    |
| Thermal correction to Enthalpy=              | 0.402517                    |
| Thermal correction to Gibbs Free Energy=     | 0.333886                    |
| Sum of electronic and zero-point Energies=   | -1724.102074                |
| Sum of electronic and thermal Energies=      | -1724.082322                |
| Sum of electronic and thermal Enthalpies=    | -1724.081457                |
| Sum of electronic and thermal Free Energies= | -1724.150088                |

Number of Imaginary Frequencies = 0

E (Single Point Energy) [IEFPCM<sub>(DCM)</sub>M06-2X/6-311++G(2d,2p)] = -1724.786027

|   |             |             |             |
|---|-------------|-------------|-------------|
| C | -0.20294900 | 1.09364800  | -1.57221400 |
| H | -0.06839100 | 0.32878100  | -2.33095200 |
| C | -1.19593800 | 0.95538600  | -0.66461600 |
| N | -1.96408600 | -0.20532500 | -0.60168900 |
| C | -3.30817900 | -0.23253400 | -0.03173700 |
| H | -3.87817800 | 0.68038200  | -0.22835700 |
| C | -1.77532900 | -1.27523800 | -1.58296700 |
| H | -0.74609100 | -1.64332700 | -1.53908900 |
| H | -1.97522800 | -0.91023200 | -2.60317500 |
| C | -2.80531800 | -2.31437200 | -1.15768000 |
| H | -2.41856400 | -2.90079800 | -0.31697000 |

|   |             |             |             |
|---|-------------|-------------|-------------|
| H | -3.06552100 | -3.00128000 | -1.96476500 |
| C | -3.98466800 | -1.44351100 | -0.71841300 |
| H | -4.53185300 | -1.08426800 | -1.59431000 |
| H | -4.69301500 | -1.94810300 | -0.05838300 |
| C | -1.48396900 | 1.96890600  | 0.42458200  |
| H | -2.55829400 | 2.18492900  | 0.45026600  |
| H | -1.23666800 | 1.52294200  | 1.39768500  |
| C | 0.99966400  | -0.62628300 | 0.80313900  |
| H | 0.85699900  | 0.26044700  | 1.44827800  |
| C | 2.29405800  | -0.59375800 | 0.02706500  |
| O | 0.20242300  | -1.53902700 | 0.79827600  |
| C | -3.31260200 | -0.42269800 | 1.48683200  |
| O | -2.23178700 | -0.96815300 | 2.03858300  |
| O | -4.27777700 | -0.13262800 | 2.16012900  |
| C | 3.47011900  | -0.79764600 | 0.98688600  |
| H | 3.33588100  | -0.09234600 | 1.81849700  |
| C | 4.83235800  | -0.55592800 | 0.33996200  |
| H | 4.97163300  | -1.25847600 | -0.48830300 |
| H | 4.84872800  | 0.45322000  | -0.09006100 |
| H | 2.37318200  | 0.38964000  | -0.44531300 |
| H | 3.41548600  | -1.80926200 | 1.40670200  |
| C | 5.96865800  | -0.71120300 | 1.34828500  |
| H | 5.86226300  | 0.00187700  | 2.17196700  |
| H | 5.97579700  | -1.71928500 | 1.77483700  |
| H | 6.93915600  | -0.53885900 | 0.87605600  |
| H | -1.51131300 | -1.11835300 | 1.38540100  |
| C | -0.75633500 | 3.29918000  | 0.26959200  |
| C | 0.76855600  | 2.24050000  | -1.65313300 |

|    |             |             |             |
|----|-------------|-------------|-------------|
| H  | -1.18428200 | 3.88327600  | -0.55107800 |
| H  | -0.84812800 | 3.88640800  | 1.18488500  |
| H  | 1.75092600  | 1.88012800  | -1.97492900 |
| H  | 0.45520300  | 2.98747600  | -2.39243300 |
| Cl | 2.28299500  | -1.80708000 | -1.29243100 |
| S  | 1.01727100  | 3.08340500  | -0.06016900 |

**(R)-TS1<sub>T</sub>-Cl**

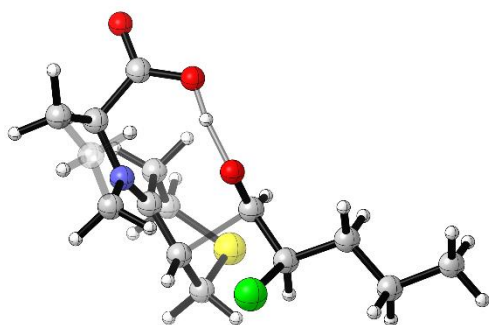

-----  
 - Thermochemistry -  
 -----

|                                              |                             |
|----------------------------------------------|-----------------------------|
| Zero-point correction=                       | 0.381793 (Hartree/Particle) |
| Thermal correction to Energy=                | 0.399942                    |
| Thermal correction to Enthalpy=              | 0.400807                    |
| Thermal correction to Gibbs Free Energy=     | 0.336803                    |
| Sum of electronic and zero-point Energies=   | -1724.092262                |
| Sum of electronic and thermal Energies=      | -1724.074114                |
| Sum of electronic and thermal Enthalpies=    | -1724.073249                |
| Sum of electronic and thermal Free Energies= | -1724.137252                |

Number of Imaginary Frequencies = 1

E (Single Point Energy) [IEFPCM(DCM)M06-2X/6-311++G(2d,2p)] = -1724.774436

|   |             |             |             |
|---|-------------|-------------|-------------|
| C | -0.02605600 | 1.06081600  | -1.19138300 |
| H | 0.24953700  | 0.38239100  | -1.99360500 |
| C | -1.27469000 | 0.87205200  | -0.60035400 |
| N | -1.89977000 | -0.31032400 | -0.70555500 |

|   |             |             |             |
|---|-------------|-------------|-------------|
| C | -3.12941900 | -0.67099900 | 0.00799800  |
| H | -3.89544100 | 0.09937600  | -0.10135500 |
| C | -1.48539800 | -1.37001600 | -1.64950500 |
| H | -0.40973700 | -1.52715400 | -1.60135500 |
| H | -1.76853800 | -1.06865200 | -2.66685200 |
| C | -2.27045100 | -2.58628400 | -1.17420500 |
| H | -1.73254400 | -3.06896500 | -0.35134500 |
| H | -2.41671100 | -3.31858900 | -1.96957600 |
| C | -3.58079200 | -1.97539800 | -0.67783300 |
| H | -4.22602200 | -1.72400200 | -1.52433800 |
| H | -4.14264500 | -2.61418000 | 0.00509600  |
| C | -1.87046300 | 1.87653900  | 0.36301000  |
| H | -2.96112500 | 1.85116200  | 0.28709300  |
| H | -1.61797000 | 1.55972200  | 1.38496200  |
| C | 0.96120400  | -0.05725600 | 0.40313900  |
| H | 0.88771200  | 0.81361400  | 1.07356400  |
| C | 2.35247700  | -0.19454000 | -0.19794800 |
| O | 0.30328200  | -1.10398900 | 0.65232900  |
| C | -2.95505300 | -0.88087800 | 1.52232000  |
| O | -1.75515600 | -1.06271100 | 2.01598200  |
| O | -3.95367300 | -0.89808000 | 2.21970600  |
| C | 3.31253100  | -0.66221700 | 0.89762500  |
| H | 3.18871400  | 0.02579600  | 1.74529600  |
| C | 4.77989600  | -0.67723800 | 0.47476400  |
| H | 4.91235000  | -1.37503600 | -0.35875600 |
| H | 5.05853700  | 0.31743300  | 0.10477300  |
| H | 2.69610400  | 0.75594400  | -0.60824700 |
| H | 2.99566900  | -1.65425600 | 1.23992900  |



|    |             |             |             |
|----|-------------|-------------|-------------|
| C  | 5.69426800  | -1.07507000 | 1.63194700  |
| H  | 5.59936200  | -0.37260300 | 2.46622400  |
| H  | 5.43972000  | -2.07294200 | 2.00319900  |
| H  | 6.74190400  | -1.08909800 | 1.32023900  |
| H  | -0.92885200 | -1.04576000 | 1.36829500  |
| C  | -1.41993100 | 3.31788700  | 0.15118100  |
| C  | 0.62955800  | 2.41732300  | -1.30687100 |
| H  | -1.81042000 | 3.71252700  | -0.79182200 |
| H  | -1.79919700 | 3.94326800  | 0.96099300  |
| H  | 1.70902100  | 2.31354800  | -1.44113600 |
| H  | 0.26079300  | 2.95112800  | -2.19057700 |
| Cl | 2.35410800  | -1.36379900 | -1.57487000 |
| S  | 0.38666400  | 3.48200600  | 0.14522100  |

**(R)-TS1<sub>T</sub>-Cl-P**

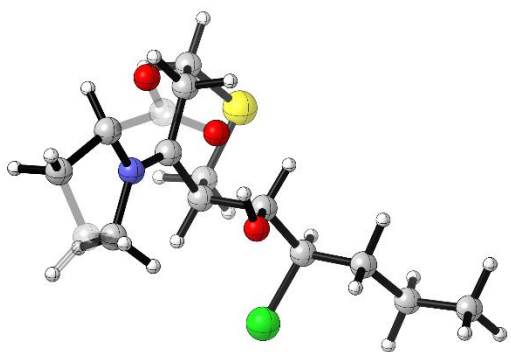

-----  
 - Thermochemistry -  
 -----

|                                              |                             |
|----------------------------------------------|-----------------------------|
| Zero-point correction=                       | 0.386258 (Hartree/Particle) |
| Thermal correction to Energy=                | 0.404439                    |
| Thermal correction to Enthalpy=              | 0.405304                    |
| Thermal correction to Gibbs Free Energy=     | 0.341091                    |
| Sum of electronic and zero-point Energies=   | -1724.120199                |
| Sum of electronic and thermal Energies=      | -1724.102017                |
| Sum of electronic and thermal Enthalpies=    | -1724.101152                |
| Sum of electronic and thermal Free Energies= | -1724.165365                |

Number of Imaginary Frequencies = 0

E (Single Point Energy) [IEFPCM(DCM)M06-2X/6-311++G(2d,2p)] = -1724.806482

|   |             |             |             |
|---|-------------|-------------|-------------|
| C | 0.15411500  | 0.79540200  | -0.85218600 |
| H | 0.17852400  | 0.22399000  | -1.78104100 |
| C | -1.24512500 | 0.80996600  | -0.29852400 |
| N | -2.08816200 | -0.09958600 | -0.65744900 |
| C | -3.35813000 | -0.37710600 | 0.05345300  |
| H | -3.93487200 | 0.53925100  | 0.17802400  |
| C | -1.84143700 | -1.14777100 | -1.69879600 |
| H | -0.82727500 | -1.52922800 | -1.60731500 |
| H | -1.98544400 | -0.67298100 | -2.67411900 |
| C | -2.90690200 | -2.20183000 | -1.41453000 |
| H | -2.53792500 | -2.90824600 | -0.66456500 |
| H | -3.16425400 | -2.75734200 | -2.31706700 |
| C | -4.06772500 | -1.38448600 | -0.85023600 |
| H | -4.59884900 | -0.86309600 | -1.65265800 |
| H | -4.78487200 | -1.97193700 | -0.27689000 |
| C | -1.57098000 | 1.78477600  | 0.80074600  |
| H | -2.64003400 | 1.79653000  | 1.01140900  |
| H | -1.07883700 | 1.40601600  | 1.70556700  |
| C | 1.00045800  | 0.00314200  | 0.20074600  |
| H | 1.00477000  | 0.57489200  | 1.14097300  |
| C | 2.47238500  | -0.11842500 | -0.18811000 |
| O | 0.47215600  | -1.28053700 | 0.39556100  |
| C | -3.04941200 | -0.97202100 | 1.47612200  |
| O | -1.84006100 | -1.11139800 | 1.80162400  |
| O | -4.06402500 | -1.23885200 | 2.13630500  |

|    |             |             |             |
|----|-------------|-------------|-------------|
| C  | 3.26277400  | -0.94683600 | 0.81501100  |
| H  | 3.03051700  | -0.54115100 | 1.80960400  |
| C  | 4.77362100  | -0.91111900 | 0.59630900  |
| H  | 5.01013100  | -1.32235600 | -0.39102900 |
| H  | 5.11555600  | 0.13167600  | 0.59557500  |
| H  | 2.91040500  | 0.87950600  | -0.26949000 |
| H  | 2.89080600  | -1.97602200 | 0.79843800  |
| C  | 5.51804000  | -1.69821700 | 1.67312600  |
| H  | 5.31769000  | -1.28723800 | 2.66795200  |
| H  | 5.20371100  | -2.74686700 | 1.67504400  |
| H  | 6.59838800  | -1.67083900 | 1.50832600  |
| H  | -0.35199800 | -1.23797400 | 0.93924700  |
| C  | -1.10565900 | 3.21840200  | 0.52173000  |
| C  | 0.68371300  | 2.19674600  | -1.18421300 |
| H  | -1.63811300 | 3.64156200  | -0.33530200 |
| H  | -1.32775300 | 3.83571300  | 1.39344400  |
| H  | 1.70691900  | 2.12788800  | -1.55867500 |
| H  | 0.08011400  | 2.63160300  | -1.98668200 |
| Cl | 2.62825800  | -0.83845100 | -1.85385700 |
| S  | 0.68102900  | 3.33687300  | 0.22732100  |

(S)-TS1<sub>T</sub>-Cl-Pre

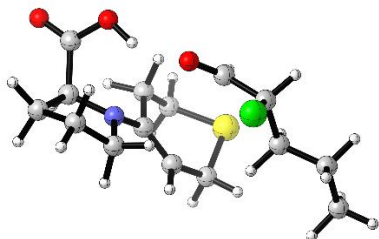

-----  
- Thermochemistry -  
-----

|                                              |                             |
|----------------------------------------------|-----------------------------|
| Zero-point correction=                       | 0.381822 (Hartree/Particle) |
| Thermal correction to Energy=                | 0.401559                    |
| Thermal correction to Enthalpy=              | 0.402424                    |
| Thermal correction to Gibbs Free Energy=     | 0.333383                    |
| Sum of electronic and zero-point Energies=   | -1724.101640                |
| Sum of electronic and thermal Energies=      | -1724.081903                |
| Sum of electronic and thermal Enthalpies=    | -1724.081038                |
| Sum of electronic and thermal Free Energies= | -1724.150079                |

Number of Imaginary Frequencies = 0

E (Single Point Energy) [IEFPCM<sub>(DCM)</sub>M06-2X/6-311++G(2d,2p)] = -1724.785259

|   |             |             |             |
|---|-------------|-------------|-------------|
| C | 0.24980000  | 1.21338500  | -1.31143000 |
| H | 0.50799700  | 0.49287800  | -2.08204500 |
| C | -0.88987900 | 1.04237000  | -0.60824000 |
| N | -1.67130200 | -0.10861600 | -0.74460400 |
| C | -3.12823300 | -0.06689900 | -0.61611200 |
| H | -3.56213300 | 0.86899300  | -0.98308700 |
| C | -1.25425800 | -1.17931500 | -1.64930400 |
| H | -0.28653100 | -1.57980500 | -1.32893300 |
| H | -1.15691100 | -0.81373800 | -2.68413200 |
| C | -2.39634600 | -2.18088600 | -1.53768600 |
| H | -2.29378700 | -2.76342100 | -0.61563600 |
| H | -2.43320600 | -2.87202200 | -2.38144700 |
| C | -3.61827400 | -1.26123200 | -1.47105100 |

|   |             |             |             |
|---|-------------|-------------|-------------|
| H | -3.86527900 | -0.89570700 | -2.47158900 |
| H | -4.51025700 | -1.72943500 | -1.05034200 |
| C | -1.36075600 | 1.99678000  | 0.46990400  |
| H | -2.43225900 | 2.19567800  | 0.34670700  |
| H | -1.24864500 | 1.50385600  | 1.44542900  |
| C | 0.89765900  | -0.82355500 | 1.36770000  |
| H | 0.88124800  | 0.22958700  | 1.70604300  |
| C | 2.28483600  | -1.33267100 | 1.04396700  |
| O | -0.11534100 | -1.48249400 | 1.30094700  |
| C | -3.61087600 | -0.22889400 | 0.82645600  |
| O | -2.76219100 | -0.76518700 | 1.69681400  |
| O | -4.73726300 | 0.07589800  | 1.15592400  |
| C | 3.02880600  | -0.36435500 | 0.12774700  |
| H | 2.54576800  | -0.37079900 | -0.85721500 |
| C | 4.52062000  | -0.65592900 | -0.00840200 |
| H | 4.97783100  | -0.66442900 | 0.98868200  |
| H | 4.66136900  | -1.65591300 | -0.43223200 |
| H | 2.81575800  | -1.41352600 | 2.00115800  |
| H | 2.88986100  | 0.64160400  | 0.54895500  |
| C | 5.20981800  | 0.38384000  | -0.88955300 |
| H | 4.77510300  | 0.39170000  | -1.89463700 |
| H | 5.10009100  | 1.38871900  | -0.46813800 |
| H | 6.27797100  | 0.17438600  | -0.98740200 |
| H | -1.87410100 | -0.91667900 | 1.30090600  |
| C | -0.64233800 | 3.33998700  | 0.48883900  |
| C | 1.21998900  | 2.35531100  | -1.16391100 |
| H | -0.92807400 | 3.94817900  | -0.37511100 |
| H | -0.90143600 | 3.89379200  | 1.39286600  |

|    |            |             |             |
|----|------------|-------------|-------------|
| H  | 2.24593800 | 2.00138400  | -1.30205200 |
| H  | 1.04728800 | 3.12554000  | -1.92521100 |
| Cl | 2.21768600 | -2.98777300 | 0.35960900  |
| S  | 1.16373700 | 3.14489200  | 0.47276900  |

(S)-TS1<sub>T</sub>-Cl

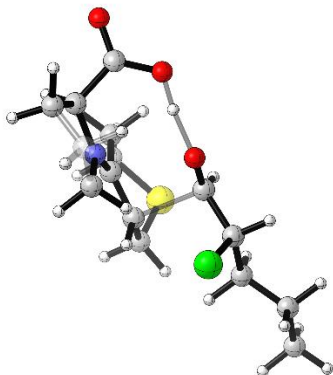

-----  
- Thermochemistry -  
-----

|                                              |                             |
|----------------------------------------------|-----------------------------|
| Zero-point correction=                       | 0.381811 (Hartree/Particle) |
| Thermal correction to Energy=                | 0.399850                    |
| Thermal correction to Enthalpy=              | 0.400715                    |
| Thermal correction to Gibbs Free Energy=     | 0.337056                    |
| Sum of electronic and zero-point Energies=   | -1724.086298                |
| Sum of electronic and thermal Energies=      | -1724.068259                |
| Sum of electronic and thermal Enthalpies=    | -1724.067394                |
| Sum of electronic and thermal Free Energies= | -1724.131053                |

Number of Imaginary Frequencies = 1

E (Single Point Energy) [IEFPCM<sub>(DCM)</sub>M06-2X/6-311++G(2d,2p)] = -1724.768234

|   |             |             |             |
|---|-------------|-------------|-------------|
| C | 0.41136000  | 0.64516000  | -1.01382900 |
| H | 0.66493800  | -0.20383800 | -1.64541600 |
| C | -0.94356800 | 0.82452100  | -0.70570100 |
| N | -1.80345700 | -0.19643300 | -0.78847900 |
| C | -3.20841300 | -0.14848800 | -0.36046900 |

|   |             |             |             |
|---|-------------|-------------|-------------|
| H | -3.71864000 | 0.72069100  | -0.78048100 |
| C | -1.47975900 | -1.48278600 | -1.43976800 |
| H | -0.50575100 | -1.84017400 | -1.11411500 |
| H | -1.47471600 | -1.33627600 | -2.52792500 |
| C | -2.61320100 | -2.39593100 | -0.99129500 |
| H | -2.38651900 | -2.79616400 | 0.00267400  |
| H | -2.76505200 | -3.23131000 | -1.67633500 |
| C | -3.81012800 | -1.44774000 | -0.93142900 |
| H | -4.18714600 | -1.25000900 | -1.93887100 |
| H | -4.63789800 | -1.80824500 | -0.31922000 |
| C | -1.45242500 | 2.08104400  | -0.02739900 |
| H | -2.49697500 | 2.25025900  | -0.30142800 |
| H | -1.43794300 | 1.89713200  | 1.05631800  |
| C | 0.79263000  | -0.35315600 | 0.89562300  |
| H | 0.93174600  | 0.63052800  | 1.37046200  |
| C | 2.11579900  | -1.09373300 | 0.69792400  |
| O | -0.21227700 | -1.06317500 | 1.18256900  |
| C | -3.42118700 | -0.06876700 | 1.16161600  |
| O | -2.43138500 | -0.35315800 | 1.96961400  |
| O | -4.52767000 | 0.23684700  | 1.56957800  |
| C | 3.32690400  | -0.28231400 | 0.26886800  |
| H | 3.30767800  | -0.14347500 | -0.81709600 |
| C | 4.65211300  | -0.92931600 | 0.67064500  |
| H | 4.67761200  | -1.04677700 | 1.76082300  |
| H | 4.70697700  | -1.93640300 | 0.24162300  |
| H | 2.30581900  | -1.52348800 | 1.68983900  |
| H | 3.25055500  | 0.71052800  | 0.73461400  |
| C | 5.85052000  | -0.10351600 | 0.20908200  |

|    |             |             |             |
|----|-------------|-------------|-------------|
| H  | 5.85637000  | -0.00071300 | -0.88091300 |
| H  | 5.82205900  | 0.90229500  | 0.64079100  |
| H  | 6.79206500  | -0.57152300 | 0.50760800  |
| H  | -1.49751500 | -0.60743900 | 1.55874600  |
| C  | -0.67782600 | 3.35892000  | -0.32879800 |
| C  | 1.31110200  | 1.84612000  | -1.23610800 |
| H  | -0.81745100 | 3.66399200  | -1.37045100 |
| H  | -1.04247900 | 4.16459100  | 0.31051300  |
| H  | 2.36119200  | 1.56472400  | -1.20720600 |
| H  | 1.13179100  | 2.27576900  | -2.22911000 |
| Cl | 1.90958300  | -2.53683500 | -0.37063700 |
| S  | 1.09798100  | 3.17202000  | -0.01457000 |

(S)-TS1<sub>T</sub>-Cl-P

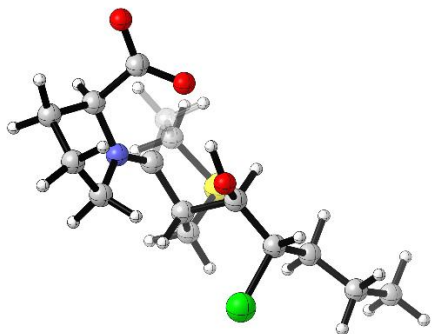

-----  
 - Thermochemistry -  
 -----

|                                              |                             |
|----------------------------------------------|-----------------------------|
| Zero-point correction=                       | 0.386197 (Hartree/Particle) |
| Thermal correction to Energy=                | 0.404426                    |
| Thermal correction to Enthalpy=              | 0.405291                    |
| Thermal correction to Gibbs Free Energy=     | 0.341112                    |
| Sum of electronic and zero-point Energies=   | -1724.116090                |
| Sum of electronic and thermal Energies=      | -1724.097861                |
| Sum of electronic and thermal Enthalpies=    | -1724.096996                |
| Sum of electronic and thermal Free Energies= | -1724.161176                |



Number of Imaginary Frequencies = 0

E (Single Point Energy) [IEFPCM<sub>(DCM)</sub>M06-2X/6-311++G(2d,2p)] = -1724.802266

|   |             |             |             |
|---|-------------|-------------|-------------|
| C | 0.28484600  | 0.12929700  | -0.82136200 |
| H | 0.19732400  | -0.71677700 | -1.50420000 |
| C | -1.08604900 | 0.66464500  | -0.49631700 |
| N | -2.12903600 | -0.07324500 | -0.67952800 |
| C | -3.46235000 | 0.22368100  | -0.10596000 |
| H | -3.76360300 | 1.24333300  | -0.34489000 |
| C | -2.12963500 | -1.43486500 | -1.30415100 |
| H | -1.27184900 | -2.00287700 | -0.95192700 |
| H | -2.07618500 | -1.29238300 | -2.38761700 |
| C | -3.46479000 | -2.03418900 | -0.87284300 |
| H | -3.35435100 | -2.52322100 | 0.09986300  |
| H | -3.81762000 | -2.77258100 | -1.59374400 |
| C | -4.37674400 | -0.81412200 | -0.75461900 |
| H | -4.69414400 | -0.47179000 | -1.74449500 |
| H | -5.26051700 | -0.98082300 | -0.13883200 |
| C | -1.18630200 | 2.00040200  | 0.19048600  |
| H | -2.22098900 | 2.33709900  | 0.24700900  |
| H | -0.85184100 | 1.84458800  | 1.22372900  |
| C | 0.83410100  | -0.43461400 | 0.53141400  |
| H | 0.92748200  | 0.39246600  | 1.24919300  |
| C | 2.22751800  | -1.07711200 | 0.46575300  |
| O | -0.04720700 | -1.41809100 | 1.02082400  |
| C | -3.40766500 | 0.07085200  | 1.45851100  |
| O | -2.30195300 | -0.24142200 | 1.97570800  |
| O | -4.49151900 | 0.28784800  | 2.01933600  |
| C | 3.42301400  | -0.13698300 | 0.57980300  |

|    |             |             |             |
|----|-------------|-------------|-------------|
| H  | 3.54762700  | 0.46500500  | -0.32590800 |
| C  | 4.73240300  | -0.86385200 | 0.88590800  |
| H  | 4.60542600  | -1.46236700 | 1.79640700  |
| H  | 4.96016600  | -1.56446200 | 0.07526800  |
| H  | 2.24915000  | -1.77765400 | 1.30409000  |
| H  | 3.20083700  | 0.56359100  | 1.39561900  |
| C  | 5.89210700  | 0.11358900  | 1.06503500  |
| H  | 6.04700100  | 0.70538600  | 0.15701000  |
| H  | 5.69553900  | 0.80813300  | 1.88815800  |
| H  | 6.82344800  | -0.41461200 | 1.28487600  |
| H  | -0.85837300 | -1.00148400 | 1.40110500  |
| C  | -0.34409800 | 3.10252500  | -0.46294700 |
| C  | 1.16228900  | 1.17106200  | -1.52521500 |
| H  | -0.71111400 | 3.32809000  | -1.46835300 |
| H  | -0.42698700 | 4.00998900  | 0.13689100  |
| H  | 2.13581300  | 0.73716500  | -1.75461200 |
| H  | 0.70302900  | 1.44417700  | -2.48076600 |
| Cl | 2.38505800  | -2.14293300 | -1.00186000 |
| S  | 1.41909800  | 2.68350100  | -0.55646700 |

**Supplementary Table 5.** Energies for enamine addition to 2-fluoropentanal. Reported energies for structures optimized at the IEFPCM<sub>(DCM)</sub>M06-2X/6-311++G(2d,2p)//IEFPCM<sub>(DCM)</sub>M06-2X/6-31+G(d,p) level of theory represent the sum of the thermal correction to Gibbs Free Energy computed at the IEFPCM<sub>(DCM)</sub>M06-2X/6-31+G(d,p) level of theory and single point energies computed at the IEFPCM<sub>(DCM)</sub>M06-2X/6-311++G(2d,2p). All energies are reported in Hartrees.

| Structure                                 | Single Point Energies, E<br>IEFPCM <sub>(DCM)</sub> M06-2X/6-311++G(2d,2p) | Thermal Corrections to Gibbs Free Energies, IEFPCM <sub>(DCM)</sub> M06-2X/6-31+G(d,p) | Gibbs Free Energies (G), IEFPCM <sub>(DCM)</sub> M06-2X/6-31+G(d,p) | Gibbs Free Energies (G), IEFPCM <sub>(DCM)</sub> M06-2X/6-311++G(2d,2p)//IEFPCM <sub>(DCM)</sub> M06-2X/6-31+G(d,p) |
|-------------------------------------------|----------------------------------------------------------------------------|----------------------------------------------------------------------------------------|---------------------------------------------------------------------|---------------------------------------------------------------------------------------------------------------------|
| 2-Fluoropentanal                          | -370.97333955                                                              | 0.104800                                                                               | -370.761392                                                         | -370.8685396                                                                                                        |
| Enamine of Cyclohexanone (G)              | -634.55147535                                                              | 0.238392                                                                               | -634.142903                                                         | -634.3130834                                                                                                        |
| Enamine of Dioxane (O)                    | -784.98483791                                                              | 0.244077                                                                               | -784.522619                                                         | -784.7407609                                                                                                        |
| Enamine of Tetrahydro-4H-thiopyranone (T) | -993.43210840                                                              | 0.210205                                                                               | -993.028735                                                         | -993.2219034                                                                                                        |
| Enamine of Tetrahydro-4H-pyranone (P)     | -670.45469021                                                              | 0.214793                                                                               | -670.055312                                                         | -670.2398972                                                                                                        |
| ( <i>R</i> )-TS1 <sub>P</sub> -F-Pre      | -1041.445897                                                               | 0.339385                                                                               | -1040.814963                                                        | -1041.106512                                                                                                        |
| ( <i>R</i> )-TS1 <sub>P</sub> -F          | -1041.438205                                                               | 0.342953                                                                               | -1040.805151                                                        | -1041.095252                                                                                                        |
| ( <i>R</i> )-TS1 <sub>P</sub> -F-P        | -1041.468899                                                               | 0.346922                                                                               | -1040.832562                                                        | -1041.121977                                                                                                        |
| ( <i>S</i> )-TS1 <sub>P</sub> -F-Pre      | -1041.445551                                                               | 0.339716                                                                               | -1040.814143                                                        | -1041.105835                                                                                                        |
| ( <i>S</i> )-TS1 <sub>P</sub> -F          | -1041.432614                                                               | 0.343526                                                                               | -1040.79923                                                         | -1041.089088                                                                                                        |
| ( <i>S</i> )-TS1 <sub>P</sub> -F-P        | -1041.465035                                                               | 0.347826                                                                               | -1040.827766                                                        | -1041.117209                                                                                                        |
| ( <i>R</i> )-TS1 <sub>G</sub> -F-Pre      | -1005.542301                                                               | 0.363097                                                                               | -1004.902179                                                        | -1005.179204                                                                                                        |
| ( <i>R</i> )-TS1 <sub>G</sub> -F          | -1005.535067                                                               | 0.366742                                                                               | -1004.892614                                                        | -1005.168325                                                                                                        |
| ( <i>R</i> )-TS1 <sub>G</sub> -F-P        | -1005.56741                                                                | 0.370131                                                                               | -1004.922232                                                        | -1005.197279                                                                                                        |
| ( <i>S</i> )-TS1 <sub>G</sub> -F-Pre      | -1005.542275                                                               | 0.363781                                                                               | -1004.901524                                                        | -1005.178494                                                                                                        |
| ( <i>S</i> )-TS1 <sub>G</sub> -F          | -1005.52915                                                                | 0.36724                                                                                | -1004.886483                                                        | -1005.16191                                                                                                         |
| ( <i>S</i> )-TS1 <sub>G</sub> -F-P        | -1005.562739                                                               | 0.371678                                                                               | -1004.915989                                                        | -1005.191061                                                                                                        |
| ( <i>R</i> )-TS1 <sub>O</sub> -F-Pre      | -1155.977106                                                               | 0.36792                                                                                | -1155.284337                                                        | -1155.609186                                                                                                        |
| ( <i>R</i> )-TS1 <sub>O</sub> -F          | -1155.966865                                                               | 0.371031                                                                               | -1155.272322                                                        | -1155.595834                                                                                                        |

|                                              |              |          |              |              |
|----------------------------------------------|--------------|----------|--------------|--------------|
| ( <i>R</i> )- <b>TS1</b> <sub>O</sub> -F-P   | -1155.993515 | 0.374432 | -1155.296115 | -1155.619083 |
| ( <i>S</i> )- <b>TS1</b> <sub>O</sub> -F-Pre | -1155.976614 | 0.369748 | -1155.281921 | -1155.606866 |
| ( <i>S</i> )- <b>TS1</b> <sub>O</sub> -F     | -1155.962553 | 0.371627 | -1155.267711 | -1155.590926 |
| ( <i>S</i> )- <b>TS1</b> <sub>O</sub> -F-P   | -1155.990751 | 0.374972 | -1155.293024 | -1155.615779 |
| ( <i>R</i> )- <b>TS1</b> <sub>T</sub> -F-Pre | -1364.424378 | 0.334681 | -1363.789529 | -1364.089697 |
| ( <i>R</i> )- <b>TS1</b> <sub>T</sub> -F     | -1364.414632 | 0.338653 | -1363.777503 | -1364.075979 |
| ( <i>R</i> )- <b>TS1</b> <sub>T</sub> -F-P   | -1364.445963 | 0.342962 | -1363.804973 | -1364.103001 |
| ( <i>S</i> )- <b>TS1</b> <sub>T</sub> -F-Pre | -1364.424621 | 0.335908 | -1363.78861  | -1364.088713 |
| ( <i>S</i> )- <b>TS1</b> <sub>T</sub> -F     | -1364.408701 | 0.339218 | -1363.771275 | -1364.069483 |
| ( <i>S</i> )- <b>TS1</b> <sub>T</sub> -F-P   | -1364.440624 | 0.342683 | -1363.799902 | -1364.097941 |

Pre – Precomplex

P – Product

2-Fluoropentanal

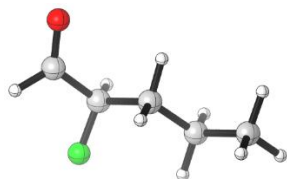

-----  
- Thermochemistry -  
-----

|                                              |                             |
|----------------------------------------------|-----------------------------|
| Zero-point correction=                       | 0.134820 (Hartree/Particle) |
| Thermal correction to Energy=                | 0.142059                    |
| Thermal correction to Enthalpy=              | 0.142924                    |
| Thermal correction to Gibbs Free Energy=     | 0.104800                    |
| Sum of electronic and zero-point Energies=   | -370.731371                 |
| Sum of electronic and thermal Energies=      | -370.724132                 |
| Sum of electronic and thermal Enthalpies=    | -370.723267                 |
| Sum of electronic and thermal Free Energies= | -370.761392                 |

Number of Imaginary Frequencies = 0

E (Single Point Energy) [IEFPCM(DCM)M06-2X/6-311++G(2d,2p)] = -370.97333955

|   |             |             |             |
|---|-------------|-------------|-------------|
| C | -2.05152900 | -0.21022600 | -0.16519200 |
| H | -2.69577600 | 0.44411600  | -0.78260500 |
| C | -0.75208400 | 0.40682200  | 0.31057700  |
| O | -2.36292400 | -1.34621100 | 0.10454700  |
| C | 0.46296200  | -0.35915200 | -0.18435800 |
| H | 0.34683400  | -1.39863500 | 0.14420100  |
| C | 1.77752800  | 0.22096200  | 0.33419300  |
| H | 1.85726800  | 1.26922600  | 0.02723400  |
| H | 1.76581600  | 0.21102400  | 1.43102300  |
| H | 0.45389800  | -0.36131900 | -1.28168900 |
| C | 2.98317100  | -0.56298700 | -0.17959400 |
| H | 3.02320900  | -0.54321400 | -1.27342200 |
| H | 3.91856400  | -0.14272900 | 0.19888700  |
| H | 2.93120500  | -1.61025400 | 0.13508900  |
| H | -0.76438900 | 0.46487000  | 1.40609300  |
| F | -0.71705800 | 1.71823300  | -0.17054900 |

(*R*)-TS1<sub>p</sub>-F-Pre

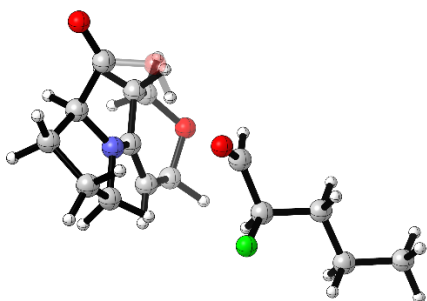

-----  
- Thermochemistry -  
-----

|                                              |                             |
|----------------------------------------------|-----------------------------|
| Zero-point correction=                       | 0.386815 (Hartree/Particle) |
| Thermal correction to Energy=                | 0.405898                    |
| Thermal correction to Enthalpy=              | 0.406763                    |
| Thermal correction to Gibbs Free Energy=     | 0.339385                    |
| Sum of electronic and zero-point Energies=   | -1040.767533                |
| Sum of electronic and thermal Energies=      | -1040.748450                |
| Sum of electronic and thermal Enthalpies=    | -1040.747585                |
| Sum of electronic and thermal Free Energies= | -1040.814963                |

Number of Imaginary Frequencies = 0

E (Single Point Energy) [IEFPCM(DCM)M06-2X/6-311++G(2d,2p)] = -1041.445897

|   |             |             |             |
|---|-------------|-------------|-------------|
| C | -0.06323800 | 1.42534700  | -1.36994400 |
| H | 0.26933300  | 0.79589400  | -2.18977000 |
| C | -1.09896000 | 1.06356600  | -0.58269900 |
| N | -1.69844400 | -0.18522000 | -0.65054400 |
| C | -3.07666300 | -0.41960300 | -0.22931500 |
| H | -3.73565000 | 0.42923800  | -0.43687200 |
| C | -1.26582900 | -1.15912600 | -1.65306400 |
| H | -0.20642900 | -1.39352200 | -1.50910900 |
| H | -1.40355100 | -0.76129800 | -2.67102000 |
| C | -2.18981200 | -2.34365000 | -1.39529000 |
| H | -1.82132800 | -2.92426800 | -0.54256700 |
| H | -2.27024700 | -3.00875200 | -2.25668200 |
| C | -3.51341800 | -1.65455800 | -1.05266500 |
| H | -4.00231300 | -1.30781300 | -1.96729400 |
| H | -4.21868300 | -2.28339300 | -0.50623700 |
| C | -1.55934900 | 1.97486300  | 0.53229700  |
| H | -2.65155500 | 2.05942600  | 0.54588500  |
| H | -1.26028100 | 1.54616300  | 1.49878500  |
| C | 1.30808600  | -0.22309700 | 0.75418300  |
| H | 1.23965000  | 0.77061900  | 1.23289700  |

|   |             |             |             |
|---|-------------|-------------|-------------|
| C | 2.51756700  | -0.43441100 | -0.12579500 |
| O | 0.50088000  | -1.10102800 | 0.97962100  |
| C | -3.21265800 | -0.70936100 | 1.26812500  |
| O | -2.11349000 | -1.04861400 | 1.93328200  |
| O | -4.29088100 | -0.67052800 | 1.82103400  |
| C | 3.78228700  | -0.53447500 | 0.71791900  |
| H | 3.84912600  | 0.36256400  | 1.34618600  |
| C | 5.04300700  | -0.66761800 | -0.13563900 |
| H | 4.94964400  | -1.54785400 | -0.78021200 |
| H | 5.12210100  | 0.20465100  | -0.79590200 |
| H | 2.59372900  | 0.39471900  | -0.84043200 |
| H | 3.68124800  | -1.39623700 | 1.38949600  |
| C | 6.29900400  | -0.78436700 | 0.72475100  |
| H | 6.42007700  | 0.09753600  | 1.36198200  |
| H | 6.24541300  | -1.66350800 | 1.37470100  |
| H | 7.19432400  | -0.87822800 | 0.10481100  |
| H | -1.30635800 | -0.99624800 | 1.37408900  |
| C | -0.95760600 | 3.36552000  | 0.36982900  |
| C | 0.68358700  | 2.71687400  | -1.15573600 |
| H | -1.44652200 | 3.89722400  | -0.46017600 |
| H | -1.08275100 | 3.95289200  | 1.28099400  |
| H | 1.76588800  | 2.55419700  | -1.20946000 |
| H | 0.42914500  | 3.45445700  | -1.93500700 |
| O | 0.43491200  | 3.27834200  | 0.12156300  |
| F | 2.34529900  | -1.60252300 | -0.85567100 |

(R)-TS1<sub>p</sub>-F

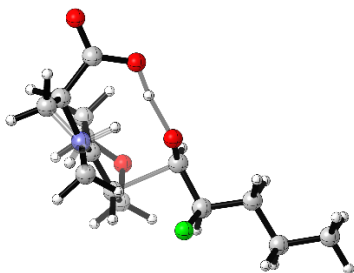

-----  
- Thermochemistry -  
-----

|                                              |                             |
|----------------------------------------------|-----------------------------|
| Zero-point correction=                       | 0.386786 (Hartree/Particle) |
| Thermal correction to Energy=                | 0.404308                    |
| Thermal correction to Enthalpy=              | 0.405173                    |
| Thermal correction to Gibbs Free Energy=     | 0.342953                    |
| Sum of electronic and zero-point Energies=   | -1040.761317                |
| Sum of electronic and thermal Energies=      | -1040.743796                |
| Sum of electronic and thermal Enthalpies=    | -1040.742931                |
| Sum of electronic and thermal Free Energies= | -1040.805151                |

Number of Imaginary Frequencies = 1

E (Single Point Energy) [IEFPCM<sub>(DCM)</sub>M06-2X/6-311++G(2d,2p)] = -1041.438205

|   |             |             |             |
|---|-------------|-------------|-------------|
| C | 0.09190600  | 1.38198100  | -1.05563300 |
| H | 0.50552200  | 0.84771500  | -1.90550800 |
| C | -1.14918500 | 1.01594700  | -0.55895100 |
| N | -1.66374300 | -0.20341100 | -0.77534100 |
| C | -2.91052000 | -0.69597500 | -0.18662500 |
| H | -3.72626600 | 0.01819000  | -0.32284100 |
| C | -1.09034300 | -1.15829900 | -1.74148400 |
| H | -0.00895800 | -1.21470300 | -1.61986600 |
| H | -1.32776500 | -0.82469800 | -2.76069400 |
| C | -1.79598000 | -2.46315000 | -1.39117800 |



|   |             |             |             |
|---|-------------|-------------|-------------|
| H | -1.28088100 | -2.94190100 | -0.55162100 |
| H | -1.81732400 | -3.16102200 | -2.22954600 |
| C | -3.19045400 | -1.99461100 | -0.97090600 |
| H | -3.79000600 | -1.75201200 | -1.85284400 |
| H | -3.74266000 | -2.71744200 | -0.36860400 |
| C | -1.84970400 | 1.91935300  | 0.42707200  |
| H | -2.93197800 | 1.89376800  | 0.27113000  |
| H | -1.65921400 | 1.55188700  | 1.44473100  |
| C | 1.12656100  | 0.18746300  | 0.49311700  |
| H | 1.06056600  | 1.05070000  | 1.17459500  |
| C | 2.45015700  | 0.05590300  | -0.24130000 |
| O | 0.48957000  | -0.87004200 | 0.73033200  |
| C | -2.84836600 | -0.97511900 | 1.32490400  |
| O | -1.68389100 | -1.07682300 | 1.92071800  |
| O | -3.89562100 | -1.12238300 | 1.92829200  |
| C | 3.50566300  | -0.53500500 | 0.68106500  |
| H | 3.57585800  | 0.10220500  | 1.57214600  |
| C | 4.87601200  | -0.64936100 | 0.01453600  |
| H | 4.78744300  | -1.26337700 | -0.88804200 |
| H | 5.20387300  | 0.34632800  | -0.30918700 |
| H | 2.78417900  | 1.01673300  | -0.64508200 |
| H | 3.15206900  | -1.51859300 | 1.01298100  |
| C | 5.91552400  | -1.25630700 | 0.95453500  |
| H | 6.03280200  | -0.64470700 | 1.85504200  |
| H | 5.61583400  | -2.26111600 | 1.26906900  |
| H | 6.89205000  | -1.33260500 | 0.46904300  |
| H | -0.82361000 | -0.94189800 | 1.35545900  |
| C | -1.35142000 | 3.35417200  | 0.29806700  |

|   |             |             |             |
|---|-------------|-------------|-------------|
| C | 0.59866300  | 2.79075800  | -0.84835500 |
| H | -1.72147800 | 3.80452300  | -0.63484700 |
| H | -1.69879700 | 3.95796700  | 1.13761200  |
| H | 1.68550900  | 2.80139900  | -0.71881800 |
| H | 0.37041500  | 3.41870900  | -1.72449500 |
| O | 0.06307400  | 3.39023300  | 0.31660600  |
| F | 2.27254300  | -0.80517200 | -1.32924300 |

**(R)-TS1<sub>p</sub>-F-P**

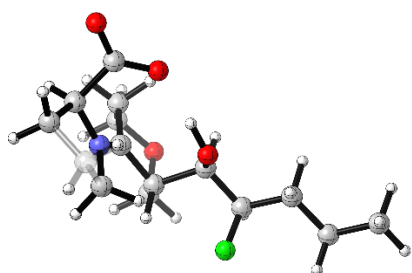

-----  
- Thermochemistry -  
-----

|                                              |                             |
|----------------------------------------------|-----------------------------|
| Zero-point correction=                       | 0.391208 (Hartree/Particle) |
| Thermal correction to Energy=                | 0.408695                    |
| Thermal correction to Enthalpy=              | 0.409560                    |
| Thermal correction to Gibbs Free Energy=     | 0.346922                    |
| Sum of electronic and zero-point Energies=   | -1040.788276                |
| Sum of electronic and thermal Energies=      | -1040.770789                |
| Sum of electronic and thermal Enthalpies=    | -1040.769924                |
| Sum of electronic and thermal Free Energies= | -1040.832562                |

Number of Imaginary Frequencies = 0

E (Single Point Energy) [IEFPCM<sub>(DCM)</sub>M06-2X/6-311++G(2d,2p)] = -1041.468899

|   |             |             |             |
|---|-------------|-------------|-------------|
| F | 2.60949200  | -0.29652700 | -1.61182700 |
| C | 0.30195200  | 1.04818100  | -0.79056300 |
| H | 0.40439300  | 0.59509700  | -1.77824900 |
| C | -1.10435200 | 0.93553600  | -0.28293300 |

|   |             |             |             |
|---|-------------|-------------|-------------|
| N | -1.89584700 | 0.00918100  | -0.70420700 |
| C | -3.16411300 | -0.35506500 | -0.03391500 |
| H | -3.78413600 | 0.52969500  | 0.11325200  |
| C | -1.57584200 | -0.96898200 | -1.78778800 |
| H | -0.54190400 | -1.29340800 | -1.69548100 |
| H | -1.73260000 | -0.45818400 | -2.74276200 |
| C | -2.58750300 | -2.09024900 | -1.56878800 |
| H | -2.19409700 | -2.80651700 | -0.84088700 |
| H | -2.79991700 | -2.62062000 | -2.49772100 |
| C | -3.80158300 | -1.35968600 | -0.99405100 |
| H | -4.34494100 | -0.83366700 | -1.78522600 |
| H | -4.49637600 | -2.00904200 | -0.46154500 |
| C | -1.47813200 | 1.85617600  | 0.84020500  |
| H | -2.55674300 | 1.90904500  | 0.98937900  |
| H | -1.04652600 | 1.42594000  | 1.75302500  |
| C | 1.18076300  | 0.22564500  | 0.21457100  |
| H | 1.20189000  | 0.75962300  | 1.17650600  |
| C | 2.62259900  | 0.14342600  | -0.27455800 |
| O | 0.68670900  | -1.07947700 | 0.36500000  |
| C | -2.86342900 | -0.98991600 | 1.37267300  |
| O | -1.65779600 | -1.09054200 | 1.72436900  |
| O | -3.88131600 | -1.32516400 | 1.99626900  |
| C | 3.48535800  | -0.79907100 | 0.53942400  |
| H | 3.39992600  | -0.50750700 | 1.59441400  |
| C | 4.95151400  | -0.77727400 | 0.10934000  |
| H | 5.02009600  | -1.03591300 | -0.95308900 |
| H | 5.34601600  | 0.24144100  | 0.21302700  |
| H | 3.06661300  | 1.14523800  | -0.28860700 |

|   |             |             |             |
|---|-------------|-------------|-------------|
| H | 3.07088300  | -1.80857400 | 0.45256800  |
| C | 5.79995600  | -1.74466900 | 0.93202700  |
| H | 5.76010000  | -1.49070600 | 1.99639900  |
| H | 5.43716000  | -2.77151900 | 0.82017700  |
| H | 6.84717000  | -1.72128700 | 0.61881200  |
| H | -0.14857100 | -1.08490700 | 0.89270500  |
| C | -0.90631100 | 3.26188800  | 0.61711000  |
| C | 0.70997200  | 2.52680600  | -0.88567800 |
| H | -1.43845300 | 3.76566700  | -0.20239900 |
| H | -1.02423800 | 3.85318500  | 1.52537300  |
| H | 1.77296100  | 2.61862800  | -1.11127800 |
| H | 0.14951100  | 3.00707100  | -1.70052500 |
| O | 0.47642700  | 3.21008500  | 0.32755800  |

(S)-TS1<sub>P</sub>-F-Pre

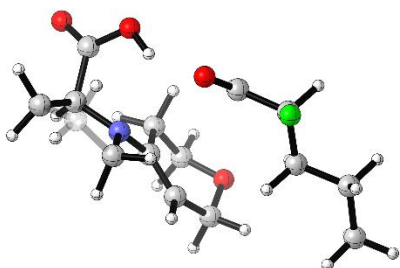

-----  
 - Thermochemistry -  
 -----

|                                              |                             |
|----------------------------------------------|-----------------------------|
| Zero-point correction=                       | 0.386939 (Hartree/Particle) |
| Thermal correction to Energy=                | 0.405957                    |
| Thermal correction to Enthalpy=              | 0.406822                    |
| Thermal correction to Gibbs Free Energy=     | 0.339716                    |
| Sum of electronic and zero-point Energies=   | -1040.766920                |
| Sum of electronic and thermal Energies=      | -1040.747902                |
| Sum of electronic and thermal Enthalpies=    | -1040.747037                |
| Sum of electronic and thermal Free Energies= | -1040.814143                |

Number of Imaginary Frequencies = 0

E (Single Point Energy) [IEFPCM<sub>(DCM)</sub>M06-2X/6-311++G(2d,2p)] = -1041.445551

|   |             |             |             |
|---|-------------|-------------|-------------|
| C | 0.44643300  | 1.33270600  | -1.24283000 |
| H | 0.63331900  | 0.75145800  | -2.14010300 |
| C | -0.65964100 | 1.13660500  | -0.49758600 |
| N | -1.56702100 | 0.10687700  | -0.73798700 |
| C | -2.98134700 | 0.23865200  | -0.39633800 |
| H | -3.36009100 | 1.25801600  | -0.52069100 |
| C | -1.37430600 | -0.78442800 | -1.87987300 |
| H | -0.42367200 | -1.31734400 | -1.77751700 |
| H | -1.35819500 | -0.21932700 | -2.82580500 |
| C | -2.59256200 | -1.69662600 | -1.80503700 |
| H | -2.43226500 | -2.47044000 | -1.04638300 |
| H | -2.81074700 | -2.18663600 | -2.75541100 |
| C | -3.69724900 | -0.72726800 | -1.37344600 |
| H | -4.04777400 | -0.15207800 | -2.23461400 |
| H | -4.56187200 | -1.21245700 | -0.91585300 |
| C | -0.91685100 | 1.98498400  | 0.72769500  |
| H | -1.94162500 | 2.37338700  | 0.72540500  |
| H | -0.81901700 | 1.36812000  | 1.63154000  |
| C | 0.88037000  | -1.30277300 | 1.10747800  |
| H | 0.68142200  | -0.35832000 | 1.64769700  |
| C | 2.33936500  | -1.63672900 | 0.93416500  |
| O | -0.02277000 | -2.00233900 | 0.70224300  |
| C | -3.27750000 | -0.15813900 | 1.04992700  |
| O | -2.42958600 | -1.00342400 | 1.62998300  |
| O | -4.26364400 | 0.23734100  | 1.63321900  |
| C | 3.06812200  | -0.53515700 | 0.18054700  |

|   |             |             |             |
|---|-------------|-------------|-------------|
| H | 2.64454500  | -0.47832900 | -0.83071600 |
| C | 4.57787500  | -0.75563100 | 0.11664600  |
| H | 4.97706800  | -0.80800400 | 1.13681900  |
| H | 4.78330300  | -1.72182800 | -0.35634000 |
| H | 2.77460000  | -1.77276100 | 1.93471700  |
| H | 2.84496300  | 0.41917700  | 0.67652400  |
| C | 5.27260400  | 0.36245900  | -0.65725400 |
| H | 5.09513900  | 1.33368500  | -0.18321000 |
| H | 6.35280100  | 0.20195900  | -0.70230200 |
| H | 4.89713700  | 0.41639300  | -1.68461700 |
| H | -1.66427200 | -1.22047400 | 1.04898900  |
| C | 0.04889700  | 3.16545400  | 0.78328800  |
| C | 1.47769700  | 2.36549100  | -0.87080000 |
| H | -0.26089600 | 3.93893200  | 0.06452900  |
| H | 0.06550800  | 3.60655100  | 1.78137300  |
| H | 2.48958600  | 1.97000100  | -1.00298200 |
| H | 1.39112100  | 3.25883300  | -1.51184400 |
| O | 1.37314100  | 2.75581800  | 0.48804100  |
| F | 2.45449900  | -2.84038100 | 0.25770200  |

(S)-TS1<sub>P</sub>-F

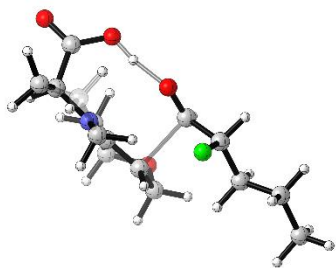

-----

- Thermochemistry -

-----

|                                              |                             |
|----------------------------------------------|-----------------------------|
| Zero-point correction=                       | 0.386991 (Hartree/Particle) |
| Thermal correction to Energy=                | 0.404417                    |
| Thermal correction to Enthalpy=              | 0.405282                    |
| Thermal correction to Gibbs Free Energy=     | 0.343526                    |
| Sum of electronic and zero-point Energies=   | -1040.755765                |
| Sum of electronic and thermal Energies=      | -1040.738339                |
| Sum of electronic and thermal Enthalpies=    | -1040.737474                |
| Sum of electronic and thermal Free Energies= | -1040.799230                |

Number of Imaginary Frequencies = 1

E (Single Point Energy) [IEFPCM(DCM)M06-2X/6-311++G(2d,2p)] = -1041.432614

|   |             |             |             |
|---|-------------|-------------|-------------|
| C | 0.60798700  | 0.86316300  | -0.86105400 |
| H | 1.02766800  | 0.08599800  | -1.49431000 |
| C | -0.76664600 | 0.89775400  | -0.66077400 |
| N | -1.53301400 | -0.19137300 | -0.80649700 |
| C | -2.96831100 | -0.24347600 | -0.51525200 |
| H | -3.49964200 | 0.58607200  | -0.98771600 |
| C | -1.04966600 | -1.44065300 | -1.42134500 |
| H | -0.08004600 | -1.71389900 | -1.00837100 |
| H | -0.95844100 | -1.29387500 | -2.50609800 |
| C | -2.14601600 | -2.44069600 | -1.07399300 |
| H | -1.98179800 | -2.82497700 | -0.06168200 |
| H | -2.17202600 | -3.28388900 | -1.76586300 |
| C | -3.41404900 | -1.58703800 | -1.12810000 |
| H | -3.71260100 | -1.41936900 | -2.16678900 |
| H | -4.26330800 | -2.01126700 | -0.59077300 |
| C | -1.40043700 | 2.12635900  | -0.05215600 |
| H | -2.40132100 | 2.28918300  | -0.46124000 |
| H | -1.51266900 | 1.96619500  | 1.02874400  |
| C | 0.95664600  | -0.20562100 | 1.05887100  |

|   |             |             |             |
|---|-------------|-------------|-------------|
| H | 1.09573600  | 0.77961400  | 1.53063800  |
| C | 2.23989200  | -0.98016000 | 0.75866900  |
| O | -0.04878000 | -0.91238900 | 1.32455600  |
| C | -3.33402200 | -0.17437100 | 0.97737500  |
| O | -2.40622700 | -0.36227900 | 1.88571800  |
| O | -4.49569400 | 0.03307200  | 1.27648100  |
| C | 3.46904700  | -0.23360900 | 0.28790700  |
| H | 3.31183600  | 0.11115400  | -0.74044500 |
| C | 4.72628500  | -1.10330300 | 0.34339100  |
| H | 4.89063800  | -1.43192600 | 1.37683100  |
| H | 4.56437800  | -2.00717200 | -0.25418200 |
| H | 2.46579500  | -1.49784300 | 1.70322900  |
| H | 3.60720700  | 0.65185200  | 0.92155200  |
| C | 5.95794300  | -0.35814100 | -0.16527900 |
| H | 6.14572900  | 0.53972600  | 0.43258900  |
| H | 6.85023400  | -0.98767300 | -0.11688500 |
| H | 5.82265100  | -0.04545600 | -1.20578000 |
| H | -1.43586200 | -0.53419800 | 1.56790400  |
| C | -0.54498100 | 3.36239200  | -0.29650100 |
| C | 1.38838100  | 2.16214500  | -0.79672200 |
| H | -0.58984200 | 3.65706000  | -1.35552900 |
| H | -0.89486300 | 4.19750300  | 0.31215100  |
| H | 2.39650800  | 2.00270400  | -0.41382000 |
| H | 1.48443200  | 2.59943400  | -1.80422300 |
| O | 0.79615900  | 3.10945700  | 0.07180400  |
| F | 1.94163400  | -1.98741000 | -0.16590700 |



(S)-TS1<sub>P</sub>-F-P

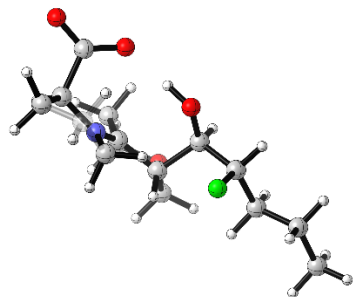

-----  
- Thermochemistry -  
-----

|                                              |                             |
|----------------------------------------------|-----------------------------|
| Zero-point correction=                       | 0.391238 (Hartree/Particle) |
| Thermal correction to Energy=                | 0.408554                    |
| Thermal correction to Enthalpy=              | 0.409419                    |
| Thermal correction to Gibbs Free Energy=     | 0.347826                    |
| Sum of electronic and zero-point Energies=   | -1040.784353                |
| Sum of electronic and thermal Energies=      | -1040.767037                |
| Sum of electronic and thermal Enthalpies=    | -1040.766172                |
| Sum of electronic and thermal Free Energies= | -1040.827766                |

Number of Imaginary Frequencies = 0

E (Single Point Energy) [IEFPCM<sub>(DCM)</sub>M06-2X/6-311++G(2d,2p)] = -1041.465035

|   |             |             |             |
|---|-------------|-------------|-------------|
| C | 0.62691600  | 0.59738700  | -0.56646400 |
| H | 0.86933400  | -0.13496400 | -1.34182600 |
| C | -0.86097900 | 0.79507800  | -0.50110600 |
| N | -1.65987800 | -0.17510300 | -0.78884200 |
| C | -3.11661700 | -0.15880100 | -0.51871900 |
| H | -3.56680400 | 0.73142900  | -0.96010700 |
| C | -1.22657200 | -1.52340100 | -1.26353100 |
| H | -0.32564600 | -1.82790000 | -0.73385900 |
| H | -1.02904300 | -1.44210300 | -2.33733900 |

|   |             |             |             |
|---|-------------|-------------|-------------|
| C | -2.43798400 | -2.40394600 | -0.97609400 |
| H | -2.40054300 | -2.75660000 | 0.05937000  |
| H | -2.46642300 | -3.27031800 | -1.63791200 |
| C | -3.61526700 | -1.44847300 | -1.17357800 |
| H | -3.80100800 | -1.28439600 | -2.23959700 |
| H | -4.53966300 | -1.78179500 | -0.70220200 |
| C | -1.36405600 | 2.09241000  | 0.05623800  |
| H | -2.41167800 | 2.26649800  | -0.19111600 |
| H | -1.30275000 | 1.99775000  | 1.14860200  |
| C | 1.09043100  | 0.02660600  | 0.82586100  |
| H | 1.31637900  | 0.88355100  | 1.47856000  |
| C | 2.35057000  | -0.83062400 | 0.69091000  |
| O | 0.15437200  | -0.83802100 | 1.41823000  |
| C | -3.39918400 | -0.13400900 | 1.02645600  |
| O | -2.41057500 | -0.12086300 | 1.80600700  |
| O | -4.60685300 | -0.12205300 | 1.30907200  |
| C | 3.62621500  | -0.17591600 | 0.20010500  |
| H | 3.51367000  | 0.08662000  | -0.85926400 |
| C | 4.84027000  | -1.09227900 | 0.36222000  |
| H | 4.96765300  | -1.33195400 | 1.42476800  |
| H | 4.64735500  | -2.03854200 | -0.15503400 |
| H | 2.51108800  | -1.29724900 | 1.66945800  |
| H | 3.78871300  | 0.75445700  | 0.75925100  |
| C | 6.11551100  | -0.45325300 | -0.18199400 |
| H | 6.33199400  | 0.48793700  | 0.33392400  |
| H | 6.97650600  | -1.11405400 | -0.05219200 |
| H | 6.01695300  | -0.23462600 | -1.25028600 |
| H | -0.73704200 | -0.44359800 | 1.57762000  |

|   |             |             |             |
|---|-------------|-------------|-------------|
| C | -0.49764600 | 3.27070100  | -0.38879100 |
| C | 1.32449600  | 1.92623200  | -0.91898000 |
| H | -0.64019200 | 3.48011000  | -1.45821500 |
| H | -0.76648600 | 4.16080900  | 0.18034400  |
| H | 2.39665500  | 1.85389700  | -0.74676300 |
| H | 1.16279900  | 2.14835600  | -1.98348500 |
| O | 0.86413700  | 3.00008100  | -0.12902200 |
| F | 2.04022900  | -1.88300300 | -0.19225600 |

(R)-TS1<sub>G</sub>-F-Pre

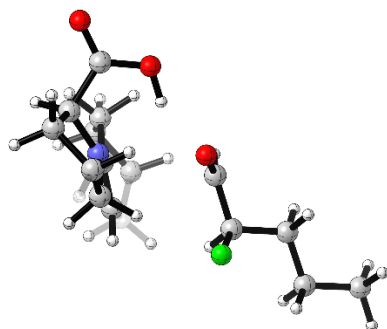

-----  
- Thermochemistry -  
-----

|                                              |                             |
|----------------------------------------------|-----------------------------|
| Zero-point correction=                       | 0.410530 (Hartree/Particle) |
| Thermal correction to Energy=                | 0.429844                    |
| Thermal correction to Enthalpy=              | 0.430709                    |
| Thermal correction to Gibbs Free Energy=     | 0.363097                    |
| Sum of electronic and zero-point Energies=   | -1004.854747                |
| Sum of electronic and thermal Energies=      | -1004.835433                |
| Sum of electronic and thermal Enthalpies=    | -1004.834568                |
| Sum of electronic and thermal Free Energies= | -1004.902179                |

Number of Imaginary Frequencies = 0

E (Single Point Energy) [IEFPCM(DCM)M06-2X/6-311++G(2d,2p)] = -1005.542301

|   |             |            |             |
|---|-------------|------------|-------------|
| C | -0.04818100 | 1.43036000 | -1.33126600 |
| H | 0.30109000  | 0.76327400 | -2.11484000 |

|   |             |             |             |
|---|-------------|-------------|-------------|
| C | -1.09587900 | 1.06123600  | -0.56021800 |
| N | -1.66531800 | -0.20923700 | -0.63986100 |
| C | -3.04739500 | -0.47164200 | -0.24817700 |
| H | -3.72434400 | 0.35743800  | -0.47614300 |
| C | -1.20901700 | -1.16144600 | -1.65296800 |
| H | -0.14484800 | -1.37301700 | -1.51609700 |
| H | -1.35902900 | -0.75629100 | -2.66692200 |
| C | -2.09915200 | -2.37320400 | -1.40644300 |
| H | -1.71682100 | -2.94791000 | -0.55569000 |
| H | -2.15700500 | -3.03554600 | -2.27198400 |
| C | -3.44320000 | -1.72470900 | -1.06615200 |
| H | -3.94320700 | -1.39795600 | -1.98210400 |
| H | -4.12872000 | -2.37408700 | -0.51811300 |
| C | -1.63805200 | 1.96495100  | 0.52815600  |
| H | -2.73259300 | 1.94176500  | 0.53252200  |
| H | -1.32183400 | 1.56796100  | 1.50487300  |
| C | 0.33921500  | 3.46086700  | 0.11771000  |
| C | 1.29625300  | -0.32312500 | 0.81234400  |
| H | 1.20443200  | 0.59831600  | 1.41518100  |
| C | 2.51100300  | -0.38824500 | -0.08247900 |
| O | 0.51040000  | -1.23972700 | 0.92925100  |
| C | -3.20032600 | -0.74969900 | 1.24896400  |
| O | -2.10702800 | -1.10190900 | 1.91857400  |
| O | -4.27968900 | -0.69464600 | 1.79872000  |
| C | 3.77476000  | -0.58696000 | 0.74523000  |
| H | 3.82696900  | 0.21454900  | 1.49297800  |
| C | 5.03948000  | -0.58127100 | -0.11281400 |
| H | 4.95990500  | -1.36279000 | -0.87561100 |

|   |             |             |             |
|---|-------------|-------------|-------------|
| H | 5.10810400  | 0.37631900  | -0.64323400 |
| H | 2.57272000  | 0.53551700  | -0.67139700 |
| H | 3.68497000  | -1.53533700 | 1.28960400  |
| C | 6.29488100  | -0.80174600 | 0.72789500  |
| H | 6.25241700  | -1.76520200 | 1.24572500  |
| H | 7.19294700  | -0.79382200 | 0.10487500  |
| H | 6.40176100  | -0.01811500 | 1.48490400  |
| H | -1.30327200 | -1.06534500 | 1.35288500  |
| C | -1.16419000 | 3.41063600  | 0.37461900  |
| C | 0.66709000  | 2.75273200  | -1.19676100 |
| H | -1.68882000 | 3.87622400  | -0.46948800 |
| H | -1.42964100 | 3.97690900  | 1.27223000  |
| H | 1.75110000  | 2.59914600  | -1.28127300 |
| H | 0.39833700  | 3.40543700  | -2.03988700 |
| H | 0.86173300  | 2.96574200  | 0.94781800  |
| H | 0.69512000  | 4.49534200  | 0.08922200  |
| F | 2.36028300  | -1.44511300 | -0.96991100 |

**(R)-TS1<sub>G-F</sub>**

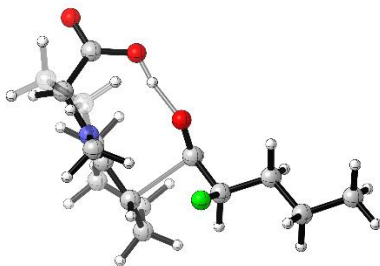

-----  
 - Thermochemistry -  
 -----

|                                 |                             |
|---------------------------------|-----------------------------|
| Zero-point correction=          | 0.410618 (Hartree/Particle) |
| Thermal correction to Energy=   | 0.428352                    |
| Thermal correction to Enthalpy= | 0.429217                    |

|                                              |              |
|----------------------------------------------|--------------|
| Thermal correction to Gibbs Free Energy=     | 0.366742     |
| Sum of electronic and zero-point Energies=   | -1004.848738 |
| Sum of electronic and thermal Energies=      | -1004.831004 |
| Sum of electronic and thermal Enthalpies=    | -1004.830139 |
| Sum of electronic and thermal Free Energies= | -1004.892614 |

Number of Imaginary Frequencies = 1

E (Single Point Energy) [IEFPCM(DCM)M06-2X/6-311++G(2d,2p)] = -1005.535067

|   |             |             |             |
|---|-------------|-------------|-------------|
| C | 0.08143300  | 1.38599300  | -1.04452200 |
| H | 0.50130000  | 0.81239300  | -1.86569100 |
| C | -1.15653500 | 1.00488600  | -0.55116400 |
| N | -1.64302100 | -0.23293000 | -0.76871700 |
| C | -2.88984500 | -0.74773800 | -0.20105100 |
| H | -3.72087500 | -0.05620900 | -0.35892000 |
| C | -1.04508600 | -1.17691900 | -1.73019900 |
| H | 0.03595900  | -1.21604500 | -1.60474700 |
| H | -1.28241500 | -0.84964500 | -2.75203600 |
| C | -1.72342800 | -2.49676000 | -1.38404500 |
| H | -1.20423200 | -2.96183200 | -0.53926700 |
| H | -1.72160700 | -3.19674900 | -2.22111200 |
| C | -3.13112700 | -2.05963000 | -0.97670800 |
| H | -3.73001100 | -1.83833600 | -1.86473400 |
| H | -3.67052600 | -2.79176700 | -0.37370100 |
| C | -1.91596500 | 1.89572800  | 0.40678200  |
| H | -2.99147700 | 1.76036200  | 0.26768100  |
| H | -1.69253300 | 1.56847500  | 1.43357800  |
| C | -0.04185800 | 3.55711300  | 0.27036400  |
| C | 1.13445500  | 0.16355700  | 0.51415300  |
| H | 1.07234300  | 1.01805500  | 1.20602100  |
| C | 2.45441600  | 0.05088300  | -0.22861200 |

|   |             |             |             |
|---|-------------|-------------|-------------|
| O | 0.49879000  | -0.89366400 | 0.74345500  |
| C | -2.84984400 | -1.00931100 | 1.31329000  |
| O | -1.69133300 | -1.10074400 | 1.92520000  |
| O | -3.90251800 | -1.15520300 | 1.90752900  |
| C | 3.52679900  | -0.51583600 | 0.69003900  |
| H | 3.59324600  | 0.12820600  | 1.57652300  |
| C | 4.89377500  | -0.61088700 | 0.01351900  |
| H | 4.80881000  | -1.23282100 | -0.88392800 |
| H | 5.20108900  | 0.38808000  | -0.32014200 |
| H | 2.76590400  | 1.01615700  | -0.63923200 |
| H | 3.19349800  | -1.50346900 | 1.03115200  |
| C | 5.95161000  | -1.19247900 | 0.94906600  |
| H | 5.67239300  | -2.20012400 | 1.27323100  |
| H | 6.92530100  | -1.25510800 | 0.45596800  |
| H | 6.06559200  | -0.57243100 | 1.84422600  |
| H | -0.83365400 | -0.96611400 | 1.36434600  |
| C | -1.55454000 | 3.37218600  | 0.24496200  |
| C | 0.59934200  | 2.80011100  | -0.89331200 |
| H | -1.95243200 | 3.74139900  | -0.70853800 |
| H | -2.03538000 | 3.94762700  | 1.04099800  |
| H | 1.68947300  | 2.78786200  | -0.76924700 |
| H | 0.41801800  | 3.35139200  | -1.82627200 |
| H | 0.34904200  | 3.18670200  | 1.22715200  |
| H | 0.22096800  | 4.61751000  | 0.21111100  |
| F | 2.28691300  | -0.82017500 | -1.30980600 |

(R)-TS1<sub>G</sub>-F-P

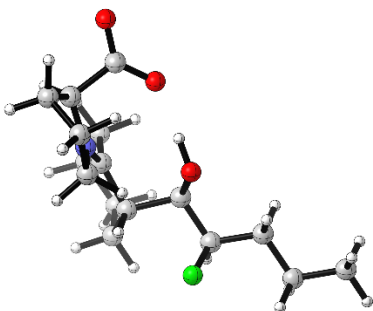

-----  
- Thermochemistry -  
-----

|                                              |                             |
|----------------------------------------------|-----------------------------|
| Zero-point correction=                       | 0.414958 (Hartree/Particle) |
| Thermal correction to Energy=                | 0.432734                    |
| Thermal correction to Enthalpy=              | 0.433599                    |
| Thermal correction to Gibbs Free Energy=     | 0.370131                    |
| Sum of electronic and zero-point Energies=   | -1004.877404                |
| Sum of electronic and thermal Energies=      | -1004.859628                |
| Sum of electronic and thermal Enthalpies=    | -1004.858763                |
| Sum of electronic and thermal Free Energies= | -1004.922232                |

Number of Imaginary Frequencies = 0

E (Single Point Energy) [IEFPCM(DCM)M06-2X/6-311++G(2d,2p)] = -1005.567410

|   |             |             |             |
|---|-------------|-------------|-------------|
| C | 0.30575600  | 1.02837100  | -0.78242900 |
| H | 0.37707500  | 0.53752900  | -1.75362200 |
| C | -1.09470400 | 0.93339000  | -0.24683900 |
| N | -1.90900600 | 0.03191200  | -0.68394500 |
| C | -3.17402500 | -0.33387100 | -0.00806000 |
| H | -3.77195900 | 0.55567800  | 0.19010700  |
| C | -1.62307300 | -0.92122700 | -1.80057400 |
| H | -0.60159800 | -1.28518300 | -1.71993000 |



|   |             |             |             |
|---|-------------|-------------|-------------|
| H | -1.76016500 | -0.37426000 | -2.73831400 |
| C | -2.66927600 | -2.01787400 | -1.62085800 |
| H | -2.29288800 | -2.77935200 | -0.93086200 |
| H | -2.90725300 | -2.49865100 | -2.57048600 |
| C | -3.85340400 | -1.27712400 | -0.99997400 |
| H | -4.38958900 | -0.70143800 | -1.76099400 |
| H | -4.56142100 | -1.92723200 | -0.48600800 |
| C | -1.44386300 | 1.82383400  | 0.91067800  |
| H | -2.50824700 | 1.79100600  | 1.13814300  |
| H | -0.92891900 | 1.39874300  | 1.78334100  |
| C | 0.49972000  | 3.33297500  | 0.31274600  |
| C | 1.17857300  | 0.18283900  | 0.20728300  |
| H | 1.18850000  | 0.66783100  | 1.19537300  |
| C | 2.62940700  | 0.13415100  | -0.25790800 |
| O | 0.68954300  | -1.13084800 | 0.30437500  |
| C | -2.86081000 | -1.03841000 | 1.36066800  |
| O | -1.65103200 | -1.17376900 | 1.68603800  |
| O | -3.87269700 | -1.38839300 | 1.98736200  |
| C | 3.48376200  | -0.84721300 | 0.51824200  |
| H | 3.37350900  | -0.61948900 | 1.58663900  |
| C | 4.95840500  | -0.78924200 | 0.12201200  |
| H | 5.05133800  | -0.98123600 | -0.95262400 |
| H | 5.34262000  | 0.22380400  | 0.29646200  |
| H | 3.06320400  | 1.13957500  | -0.20611100 |
| H | 3.08039800  | -1.85324500 | 0.36398100  |
| C | 5.79724500  | -1.79990900 | 0.90140100  |
| H | 5.44509200  | -2.82023000 | 0.71841700  |
| H | 6.85066700  | -1.75020900 | 0.61297600  |

|   |             |             |             |
|---|-------------|-------------|-------------|
| H | 5.73281100  | -1.61292100 | 1.97839200  |
| H | -0.14609300 | -1.15481000 | 0.83028600  |
| C | -0.97824700 | 3.27173900  | 0.68893000  |
| C | 0.74897900  | 2.49465000  | -0.93978000 |
| H | -1.57807600 | 3.72769500  | -0.10787800 |
| H | -1.17595000 | 3.83711000  | 1.60316000  |
| H | 1.79946200  | 2.52176600  | -1.24020600 |
| H | 0.18255000  | 2.92797200  | -1.77296700 |
| H | 1.11168400  | 2.97338300  | 1.14941400  |
| H | 0.79700200  | 4.36888700  | 0.12616800  |
| F | 2.64845600  | -0.22827900 | -1.61785300 |

(S)-TS1<sub>G</sub>-F-Pre

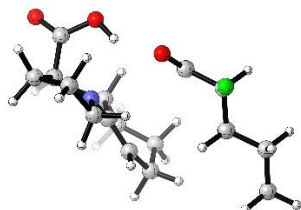

-----  
- Thermochemistry -  
-----

|                                              |                             |
|----------------------------------------------|-----------------------------|
| Zero-point correction=                       | 0.410599 (Hartree/Particle) |
| Thermal correction to Energy=                | 0.429803                    |
| Thermal correction to Enthalpy=              | 0.430668                    |
| Thermal correction to Gibbs Free Energy=     | 0.363781                    |
| Sum of electronic and zero-point Energies=   | -1004.854705                |
| Sum of electronic and thermal Energies=      | -1004.835502                |
| Sum of electronic and thermal Enthalpies=    | -1004.834636                |
| Sum of electronic and thermal Free Energies= | -1004.901524                |

Number of Imaginary Frequencies = 0

E (Single Point Energy) [IEFPCM<sub>(DCM)</sub>M06-2X/6-311++G(2d,2p)] = -1005.542275

|   |             |             |             |
|---|-------------|-------------|-------------|
| C | 0.46370500  | 1.31742000  | -1.19485900 |
| H | 0.72077700  | 0.65295800  | -2.01488500 |
| C | -0.68050700 | 1.11461900  | -0.50807600 |
| N | -1.49894900 | -0.00056900 | -0.72666200 |
| C | -2.94811000 | 0.07546100  | -0.55070800 |
| H | -3.36347300 | 1.05187300  | -0.82037000 |
| C | -1.14737400 | -0.97412200 | -1.75819300 |
| H | -0.18049100 | -1.43125800 | -1.52549400 |
| H | -1.07727600 | -0.49719500 | -2.74955800 |
| C | -2.31044900 | -1.95645400 | -1.70703900 |
| H | -2.18444400 | -2.63824300 | -0.85891500 |
| H | -2.40073500 | -2.55099800 | -2.61786600 |
| C | -3.50579400 | -1.02494100 | -1.48797300 |
| H | -3.79636400 | -0.56091800 | -2.43441700 |
| H | -4.38545600 | -1.51774400 | -1.06869300 |
| C | -1.10682800 | 2.02727600  | 0.62360600  |
| H | -2.17514600 | 2.25673800  | 0.54524200  |
| H | -0.98450200 | 1.48865100  | 1.57571200  |
| C | 0.96855700  | -1.11183200 | 1.31927200  |
| H | 0.84330200  | -0.12435900 | 1.80115800  |
| C | 2.39749900  | -1.51948000 | 1.05630400  |
| O | 0.01532200  | -1.80871600 | 1.04840500  |
| C | -3.38118400 | -0.19549900 | 0.89014000  |
| O | -2.53869900 | -0.88597200 | 1.65271200  |
| O | -4.46221400 | 0.15714900  | 1.31160400  |
| C | 3.13201000  | -0.49235300 | 0.20949500  |
| H | 2.63864000  | -0.43411400 | -0.76880900 |
| C | 4.61655800  | -0.81004800 | 0.04344300  |

|   |             |             |             |
|---|-------------|-------------|-------------|
| H | 5.08670600  | -0.86364600 | 1.03298700  |
| H | 4.72553100  | -1.79866000 | -0.41484700 |
| H | 2.89400700  | -1.63842500 | 2.03046800  |
| H | 3.01143400  | 0.48882800  | 0.68784400  |
| C | 5.31994900  | 0.24157600  | -0.81152300 |
| H | 5.24003100  | 1.23351200  | -0.35431500 |
| H | 6.38137000  | 0.01002200  | -0.93131500 |
| H | 4.87166100  | 0.29540400  | -1.80907400 |
| H | -1.69126600 | -1.07085600 | 1.18621400  |
| C | -0.31195500 | 3.33377700  | 0.65552900  |
| C | 1.42248400  | 2.44656200  | -0.90777600 |
| H | -0.66080400 | 3.99028300  | -0.15181200 |
| H | -0.50448000 | 3.85287500  | 1.59909800  |
| H | 2.45515500  | 2.08422300  | -0.98717100 |
| H | 1.32150100  | 3.22439100  | -1.67863100 |
| C | 1.17906100  | 3.06579200  | 0.46748800  |
| H | 1.75740200  | 3.98829200  | 0.57846100  |
| H | 1.52102900  | 2.37475400  | 1.25155500  |
| F | 2.40750300  | -2.75429100 | 0.42750100  |

(S)-TS1<sub>G</sub>-F

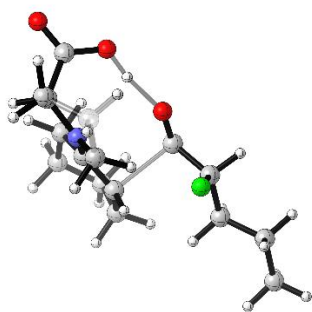

-----  
- Thermochemistry -

```

-----
Zero-point correction=                0.410799 (Hartree/Particle)
Thermal correction to Energy=         0.428426
Thermal correction to Enthalpy=       0.429291
Thermal correction to Gibbs Free Energy= 0.367240
Sum of electronic and zero-point Energies= -1004.842923
Sum of electronic and thermal Energies= -1004.825296
Sum of electronic and thermal Enthalpies= -1004.824431
Sum of electronic and thermal Free Energies= -1004.886483

```

Number of Imaginary Frequencies = 1

E (Single Point Energy) [IEFPCM<sub>(DCM)</sub>M06-2X/6-311++G(2d,2p)] = -1005.529150

|   |             |             |             |
|---|-------------|-------------|-------------|
| C | 0.60367800  | 0.89308500  | -0.84361600 |
| H | 1.01458400  | 0.09625700  | -1.45893100 |
| C | -0.77290800 | 0.90813100  | -0.64504400 |
| N | -1.51670400 | -0.20139500 | -0.80229800 |
| C | -2.95320100 | -0.28684400 | -0.52578800 |
| H | -3.50201900 | 0.52492200  | -1.00870400 |
| C | -1.00668000 | -1.43543400 | -1.42544200 |
| H | -0.03173200 | -1.69350900 | -1.01742200 |
| H | -0.92024100 | -1.28095200 | -2.50993200 |
| C | -2.07647400 | -2.46426800 | -1.08161400 |
| H | -1.90139200 | -2.84574800 | -0.07001500 |
| H | -2.08069100 | -3.30659900 | -1.77523100 |
| C | -3.36540500 | -1.64364900 | -1.13367300 |
| H | -3.67112300 | -1.48623100 | -2.17191900 |
| H | -4.20273700 | -2.08849900 | -0.59394000 |
| C | -1.45906100 | 2.11730800  | -0.04682900 |
| H | -2.48397500 | 2.18853000  | -0.41854100 |
| H | -1.53307700 | 1.96100800  | 1.03990700  |
| C | 0.95969200  | -0.22884800 | 1.06949900  |
| H | 1.10411700  | 0.74330300  | 1.56510100  |

|   |             |             |             |
|---|-------------|-------------|-------------|
| C | 2.24598000  | -0.99491700 | 0.76174700  |
| O | -0.04612500 | -0.93820000 | 1.32286000  |
| C | -3.33385200 | -0.21616000 | 0.96212900  |
| O | -2.41242600 | -0.40315100 | 1.87804200  |
| O | -4.49826700 | -0.01240500 | 1.25403100  |
| C | 3.46773700  | -0.24140300 | 0.28401800  |
| H | 3.30107300  | 0.10122900  | -0.74325600 |
| C | 4.73110900  | -1.10210900 | 0.33673200  |
| H | 4.90322100  | -1.42637700 | 1.37038300  |
| H | 4.57287400  | -2.00917700 | -0.25702900 |
| H | 2.47985500  | -1.50941200 | 1.70649200  |
| H | 3.60154300  | 0.64729900  | 0.91411600  |
| C | 5.95512200  | -0.35032400 | -0.18071200 |
| H | 6.13971200  | 0.55097800  | 0.41307000  |
| H | 6.85218600  | -0.97328700 | -0.13484100 |
| H | 5.81214700  | -0.04206900 | -1.22149800 |
| H | -1.44182600 | -0.56612200 | 1.56204600  |
| C | -0.71533700 | 3.42162400  | -0.32613700 |
| C | 1.40213500  | 2.18439200  | -0.80834800 |
| H | -0.80314800 | 3.67247000  | -1.39064600 |
| H | -1.18826100 | 4.23060100  | 0.23776200  |
| H | 2.41403100  | 1.99568600  | -0.44327800 |
| H | 1.52119800  | 2.55730600  | -1.83573100 |
| C | 0.75477000  | 3.27583900  | 0.04265900  |
| H | 1.28896100  | 4.21991500  | -0.10097700 |
| H | 0.83507400  | 3.02329100  | 1.10857700  |
| F | 1.95192000  | -2.00706100 | -0.15849000 |

(S)-TS1<sub>G</sub>-F-P

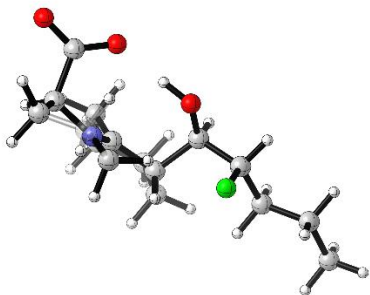

-----  
- Thermochemistry -  
-----

|                                              |                             |
|----------------------------------------------|-----------------------------|
| Zero-point correction=                       | 0.415163 (Hartree/Particle) |
| Thermal correction to Energy=                | 0.432659                    |
| Thermal correction to Enthalpy=              | 0.433524                    |
| Thermal correction to Gibbs Free Energy=     | 0.371678                    |
| Sum of electronic and zero-point Energies=   | -1004.872504                |
| Sum of electronic and thermal Energies=      | -1004.855008                |
| Sum of electronic and thermal Enthalpies=    | -1004.854143                |
| Sum of electronic and thermal Free Energies= | -1004.915989                |

Number of Imaginary Frequencies = 0

E (Single Point Energy) [IEFPCM(DCM)M06-2X/6-311++G(2d,2p)] = -1005.562739

|   |             |             |             |
|---|-------------|-------------|-------------|
| C | 0.62617700  | 0.62009200  | -0.55443300 |
| H | 0.84742500  | -0.12729600 | -1.32061500 |
| C | -0.86595700 | 0.80699300  | -0.47357100 |
| N | -1.65190500 | -0.17087700 | -0.77935700 |
| C | -3.11055400 | -0.18194200 | -0.51520600 |
| H | -3.57166400 | 0.71090400  | -0.93923800 |
| C | -1.20049800 | -1.50594200 | -1.27653700 |
| H | -0.30300800 | -1.81398700 | -0.74380500 |
| H | -0.99165400 | -1.40258900 | -2.34636500 |

|   |             |             |             |
|---|-------------|-------------|-------------|
| C | -2.40346700 | -2.40695300 | -1.01952600 |
| H | -2.36964800 | -2.78366800 | 0.00760500  |
| H | -2.41659600 | -3.25807700 | -1.70146600 |
| C | -3.59010900 | -1.46131900 | -1.20270900 |
| H | -3.77056800 | -1.27452300 | -2.26597000 |
| H | -4.51377500 | -1.81600800 | -0.74574900 |
| C | -1.39793100 | 2.08297700  | 0.11096500  |
| H | -2.47305300 | 2.17355700  | -0.03893600 |
| H | -1.24619800 | 1.99095400  | 1.19673900  |
| C | 1.09794200  | 0.02815100  | 0.82760100  |
| H | 1.34112700  | 0.86778300  | 1.49691000  |
| C | 2.35210300  | -0.83765100 | 0.67913900  |
| O | 0.16410900  | -0.83957800 | 1.42195600  |
| C | -3.40000000 | -0.19564800 | 1.02741600  |
| O | -2.41476600 | -0.17883700 | 1.81126300  |
| O | -4.60901500 | -0.21312800 | 1.30739300  |
| C | 3.63525400  | -0.19369200 | 0.19374300  |
| H | 3.52819300  | 0.06869200  | -0.86572300 |
| C | 4.84083800  | -1.11972900 | 0.36371700  |
| H | 4.96273000  | -1.35765700 | 1.42737300  |
| H | 4.64187900  | -2.06598900 | -0.15143500 |
| H | 2.50923200  | -1.31476300 | 1.65339900  |
| H | 3.80232200  | 0.73705000  | 0.75109800  |
| C | 6.12358400  | -0.49359600 | -0.17794800 |
| H | 6.34652900  | 0.44724000  | 0.33599800  |
| H | 6.97860200  | -1.16125800 | -0.04352700 |
| H | 6.03035700  | -0.27699600 | -1.24713600 |
| H | -0.73354100 | -0.45621100 | 1.57255800  |



|   |             |             |             |
|---|-------------|-------------|-------------|
| C | -0.65834100 | 3.32406600  | -0.39856000 |
| C | 1.34561900  | 1.93299900  | -0.93414700 |
| H | -0.87108300 | 3.47357400  | -1.46380500 |
| H | -1.04495100 | 4.19636900  | 0.13440800  |
| H | 2.41798900  | 1.81368500  | -0.77851500 |
| H | 1.20520700  | 2.09360500  | -2.00969700 |
| C | 0.84092400  | 3.16499800  | -0.18639000 |
| H | 1.37605200  | 4.04789600  | -0.54770600 |
| H | 1.05358100  | 3.08271600  | 0.88720400  |
| F | 2.03241400  | -1.88103900 | -0.21159200 |

(R)-TS1<sub>0</sub>-F-Pre

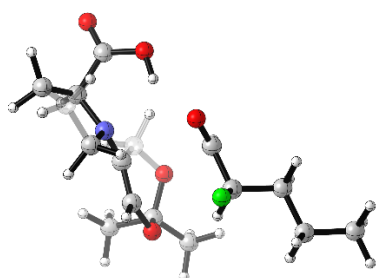

-----  
- Thermochemistry -  
-----

|                                              |                             |
|----------------------------------------------|-----------------------------|
| Zero-point correction=                       | 0.418142 (Hartree/Particle) |
| Thermal correction to Energy=                | 0.439414                    |
| Thermal correction to Enthalpy=              | 0.440279                    |
| Thermal correction to Gibbs Free Energy=     | 0.367920                    |
| Sum of electronic and zero-point Energies=   | -1155.234115                |
| Sum of electronic and thermal Energies=      | -1155.212844                |
| Sum of electronic and thermal Enthalpies=    | -1155.211979                |
| Sum of electronic and thermal Free Energies= | -1155.284337                |

Number of Imaginary Frequencies = 0

E (Single Point Energy) [IEFPCM(DCM)M06-2X/6-311++G(2d,2p)] = -1155.977106

|   |             |            |            |
|---|-------------|------------|------------|
| C | -0.01969800 | 1.02725200 | 1.28218500 |
|---|-------------|------------|------------|

|   |             |             |             |
|---|-------------|-------------|-------------|
| H | -0.15913200 | 0.48780400  | 2.21087100  |
| C | 0.96443300  | 0.77938100  | 0.39865500  |
| N | 1.89250500  | -0.24942700 | 0.55674800  |
| C | 3.22526900  | -0.15118400 | -0.03622700 |
| H | 3.54687000  | 0.88287400  | -0.19907600 |
| C | 1.92065000  | -0.99274400 | 1.81760200  |
| H | 1.01149800  | -1.59510500 | 1.91514800  |
| H | 1.97807600  | -0.30109400 | 2.67392300  |
| C | 3.19466000  | -1.82273800 | 1.69998700  |
| H | 3.01015300  | -2.71256300 | 1.08839700  |
| H | 3.57240800  | -2.14547800 | 2.67142800  |
| C | 4.14504100  | -0.85827500 | 0.98384500  |
| H | 4.52362200  | -0.11296200 | 1.68889900  |
| H | 4.99713900  | -1.34127800 | 0.50256400  |
| C | 0.98595100  | 1.54750900  | -0.90019500 |
| H | 1.79280000  | 2.29375500  | -0.92534700 |
| H | 1.13690900  | 0.86606700  | -1.74495900 |
| O | -1.01326100 | 1.95428400  | 1.06730900  |
| O | -0.27313500 | 2.16137100  | -1.12163800 |
| C | -0.77225000 | 2.87069200  | -0.00212100 |
| C | -2.12333000 | 3.41513400  | -0.41039600 |
| H | -2.60741600 | 3.88211700  | 0.44957900  |
| H | -1.99956500 | 4.15815800  | -1.20096400 |
| C | 0.18824400  | 3.95897800  | 0.46532200  |
| H | -0.30522800 | 4.56964200  | 1.22412800  |
| H | 0.46244600  | 4.59448800  | -0.38060000 |
| H | 1.09384800  | 3.53509400  | 0.90540200  |
| C | -1.04040600 | -1.14593400 | -0.61062100 |

|   |             |             |             |
|---|-------------|-------------|-------------|
| H | -0.95999200 | -0.37698100 | -1.40213300 |
| C | -2.29547100 | -1.05693300 | 0.22113100  |
| O | -0.20098400 | -2.01183900 | -0.47394800 |
| C | 3.30980300  | -0.85169400 | -1.39755500 |
| O | 2.29102100  | -1.63122000 | -1.74673000 |
| O | 4.27724000  | -0.72264200 | -2.11585400 |
| H | -2.74832100 | 2.59703500  | -0.77698100 |
| C | -3.51858500 | -1.44190500 | -0.60219900 |
| H | -3.53875700 | -0.81484800 | -1.50272200 |
| C | -4.82104800 | -1.26951800 | 0.17850800  |
| H | -4.77534100 | -1.87140400 | 1.09216400  |
| H | -4.91389700 | -0.22212100 | 0.49113500  |
| H | -3.40356600 | -2.48219000 | -0.93157600 |
| C | -6.03715700 | -1.67534900 | -0.65079900 |
| H | -6.11100200 | -1.06937500 | -1.55962600 |
| H | -5.96986500 | -2.72553200 | -0.95229000 |
| H | -6.96255200 | -1.54682300 | -0.08338500 |
| H | 1.57391500  | -1.62067000 | -1.07200400 |
| H | -2.39052200 | -0.02976300 | 0.59910100  |
| F | -2.17619500 | -1.90539100 | 1.31398200  |

(*R*)-TS1<sub>0</sub>-F

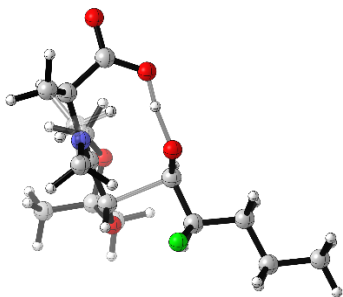

- Thermochemistry -

-----

|                                              |                             |
|----------------------------------------------|-----------------------------|
| Zero-point correction=                       | 0.417229 (Hartree/Particle) |
| Thermal correction to Energy=                | 0.436919                    |
| Thermal correction to Enthalpy=              | 0.437784                    |
| Thermal correction to Gibbs Free Energy=     | 0.371031                    |
| Sum of electronic and zero-point Energies=   | -1155.226124                |
| Sum of electronic and thermal Energies=      | -1155.206435                |
| Sum of electronic and thermal Enthalpies=    | -1155.205570                |
| Sum of electronic and thermal Free Energies= | -1155.272322                |

Number of Imaginary Frequencies = 1

E (Single Point Energy) [IEFPCM<sub>(DCM)</sub>M06-2X/6-311++G(2d,2p)] = -1155.966865

|   |             |             |             |
|---|-------------|-------------|-------------|
| C | -0.19474600 | 0.95633800  | 0.92177900  |
| H | -0.50136200 | 0.48215700  | 1.84731700  |
| C | 1.05748800  | 0.72646700  | 0.37057700  |
| N | 1.76938200  | -0.35882400 | 0.67901800  |
| C | 3.01714800  | -0.73676700 | 0.01354300  |
| H | 3.66685000  | 0.13222300  | -0.12607100 |
| C | 1.45505700  | -1.22908500 | 1.82925300  |
| H | 0.40748900  | -1.53133600 | 1.79912100  |
| H | 1.65258000  | -0.67575800 | 2.75688700  |
| C | 2.41679000  | -2.39932000 | 1.64231900  |
| H | 1.97358700  | -3.13549200 | 0.96351800  |
| H | 2.64816500  | -2.89495900 | 2.58600800  |
| C | 3.64057900  | -1.74408100 | 0.99641700  |
| H | 4.21950100  | -1.19816100 | 1.74684800  |
| H | 4.30377800  | -2.44309500 | 0.48594800  |
| C | 1.52835800  | 1.62088400  | -0.74934000 |
| H | 2.44604500  | 2.14597100  | -0.44676900 |
| H | 1.75309900  | 1.03208200  | -1.64461600 |
| O | -0.88931000 | 2.12363200  | 0.66709600  |

|   |             |             |             |
|---|-------------|-------------|-------------|
| O | 0.51273400  | 2.52535900  | -1.12750400 |
| C | -0.16647900 | 3.13164700  | -0.04219800 |
| C | -1.20004500 | 4.05515900  | -0.64662200 |
| H | -1.83252000 | 4.46552700  | 0.14294400  |
| H | -0.70257400 | 4.87366800  | -1.17073200 |
| C | 0.78630000  | 3.85179800  | 0.90654400  |
| H | 0.20243600  | 4.42183300  | 1.63179800  |
| H | 1.41901500  | 4.53947500  | 0.33963200  |
| H | 1.42309500  | 3.15580200  | 1.45817600  |
| C | -1.05536200 | -0.42123200 | -0.42033700 |
| H | -1.01376500 | 0.31223400  | -1.24297800 |
| C | -2.40066200 | -0.46289400 | 0.28352900  |
| O | -0.39802300 | -1.50447900 | -0.49235800 |
| C | 2.84324800  | -1.36456400 | -1.38523400 |
| O | 1.64812200  | -1.66244700 | -1.81916700 |
| O | 3.85006200  | -1.55959500 | -2.04467000 |
| H | -1.81785300 | 3.49496300  | -1.35174500 |
| C | -3.41629800 | -1.22611200 | -0.55138800 |
| H | -3.47467600 | -0.74793800 | -1.53780900 |
| C | -4.80264300 | -1.26150400 | 0.09066400  |
| H | -4.72788100 | -1.71589000 | 1.08439100  |
| H | -5.15888400 | -0.23425700 | 0.23706700  |
| H | -3.03509600 | -2.24266100 | -0.70594000 |
| C | -5.80295800 | -2.03999700 | -0.76143000 |
| H | -5.90675400 | -1.58782100 | -1.75319800 |
| H | -5.47420800 | -3.07518400 | -0.89854800 |
| H | -6.79132400 | -2.05952100 | -0.29453400 |
| H | 0.79665600  | -1.53876600 | -1.18396300 |

|   |             |             |            |
|---|-------------|-------------|------------|
| H | -2.74894000 | 0.55089900  | 0.50627400 |
| F | -2.23727400 | -1.12604600 | 1.50691400 |

(R)-TS1<sub>o</sub>-F-P

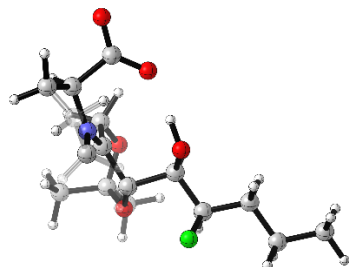

-----  
- Thermochemistry -  
-----

|                                              |                             |
|----------------------------------------------|-----------------------------|
| Zero-point correction=                       | 0.421340 (Hartree/Particle) |
| Thermal correction to Energy=                | 0.441228                    |
| Thermal correction to Enthalpy=              | 0.442093                    |
| Thermal correction to Gibbs Free Energy=     | 0.374432                    |
| Sum of electronic and zero-point Energies=   | -1155.249207                |
| Sum of electronic and thermal Energies=      | -1155.229319                |
| Sum of electronic and thermal Enthalpies=    | -1155.228454                |
| Sum of electronic and thermal Free Energies= | -1155.296115                |

Number of Imaginary Frequencies = 0

E (Single Point Energy) [IEFPCM<sub>(DCM)</sub>M06-2X/6-311++G(2d,2p)] = -1155.993515

|   |             |             |             |
|---|-------------|-------------|-------------|
| C | -0.30733000 | 0.68729300  | 0.73125200  |
| H | -0.35126700 | 0.31882900  | 1.75863800  |
| C | 1.09009900  | 0.64137000  | 0.19238700  |
| N | 1.94855600  | -0.21250100 | 0.61963900  |
| C | 3.19791300  | -0.52479100 | -0.10052300 |
| H | 3.68180200  | 0.39735800  | -0.43089700 |
| C | 1.77370000  | -1.11996900 | 1.79636400  |
| H | 0.79255200  | -1.58883100 | 1.75325800  |
| H | 1.86236600  | -0.49918300 | 2.69275200  |

|   |             |             |             |
|---|-------------|-------------|-------------|
| C | 2.93389800  | -2.10519300 | 1.66160800  |
| H | 2.62640400  | -2.96082200 | 1.05293700  |
| H | 3.25454000  | -2.47275200 | 2.63678600  |
| C | 4.01203100  | -1.29794400 | 0.93390700  |
| H | 4.50862400  | -0.60561900 | 1.62064300  |
| H | 4.76422800  | -1.91468300 | 0.44308300  |
| C | 1.38722300  | 1.52920100  | -0.98522400 |
| H | 2.30344400  | 2.10691900  | -0.80087900 |
| H | 1.53947400  | 0.90485200  | -1.87174400 |
| O | -0.89810800 | 1.96946500  | 0.70804600  |
| O | 0.28475300  | 2.36496300  | -1.24781600 |
| C | -0.27086400 | 2.97404200  | -0.09512000 |
| C | -1.37446700 | 3.88593700  | -0.58355200 |
| H | -1.92683400 | 4.28249200  | 0.27036000  |
| H | -0.94762000 | 4.71432600  | -1.15272800 |
| C | 0.77469400  | 3.70955200  | 0.73830100  |
| H | 0.26416300  | 4.27258100  | 1.52171800  |
| H | 1.33724400  | 4.40368500  | 0.10860200  |
| H | 1.47497000  | 3.02657200  | 1.22805000  |
| C | -1.13370800 | -0.28499000 | -0.18558500 |
| H | -1.15708000 | 0.15683800  | -1.19362000 |
| C | -2.56701100 | -0.34055700 | 0.32596000  |
| O | -0.58892200 | -1.57254600 | -0.18279700 |
| C | 2.87393300  | -1.39414800 | -1.37797600 |
| O | 1.66087100  | -1.55773800 | -1.67552800 |
| O | 3.88129900  | -1.80836300 | -1.96517900 |
| H | -2.05457900 | 3.31735800  | -1.22156600 |
| C | -3.44458100 | -1.30111200 | -0.44922100 |

|   |             |             |             |
|---|-------------|-------------|-------------|
| H | -3.40125600 | -1.01708600 | -1.50886900 |
| C | -4.89526300 | -1.29464700 | 0.03119200  |
| H | -4.92321000 | -1.54752900 | 1.09669000  |
| H | -5.30446800 | -0.28096800 | -0.06399100 |
| H | -3.01540300 | -2.30550100 | -0.36777800 |
| C | -5.76028400 | -2.27682600 | -0.75589000 |
| H | -5.76183400 | -2.02840900 | -1.82234100 |
| H | -5.38099200 | -3.29854200 | -0.65177300 |
| H | -6.79583100 | -2.26466400 | -0.40538000 |
| H | 0.21117300  | -1.60662400 | -0.76154000 |
| H | -2.98579200 | 0.67123500  | 0.32902600  |
| F | -2.52374900 | -0.75376700 | 1.67133500  |

(S)-TS1<sub>0</sub>-F-Pre

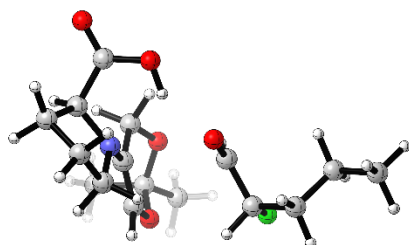

-----  
 - Thermochemistry -  
 -----

|                                              |                             |
|----------------------------------------------|-----------------------------|
| Zero-point correction=                       | 0.421340 (Hartree/Particle) |
| Thermal correction to Energy=                | 0.441228                    |
| Thermal correction to Enthalpy=              | 0.442093                    |
| Thermal correction to Gibbs Free Energy=     | 0.374432                    |
| Sum of electronic and zero-point Energies=   | -1155.249207                |
| Sum of electronic and thermal Energies=      | -1155.229319                |
| Sum of electronic and thermal Enthalpies=    | -1155.228454                |
| Sum of electronic and thermal Free Energies= | -1155.296115                |

Number of Imaginary Frequencies = 0



E (Single Point Energy) [IEFPCM<sub>(DCM)</sub>M06-2X/6-311++G(2d,2p)] =

(S)-TS1<sub>o</sub>-F

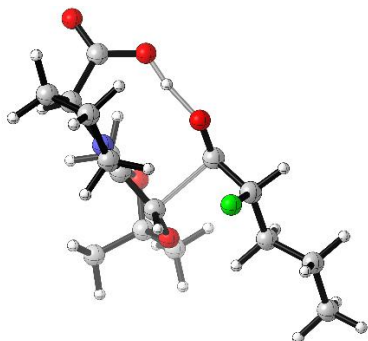

-----  
- Thermochemistry -  
-----

|                                              |                             |
|----------------------------------------------|-----------------------------|
| Zero-point correction=                       | 0.417306 (Hartree/Particle) |
| Thermal correction to Energy=                | 0.436926                    |
| Thermal correction to Enthalpy=              | 0.437791                    |
| Thermal correction to Gibbs Free Energy=     | 0.371627                    |
| Sum of electronic and zero-point Energies=   | -1155.222032                |
| Sum of electronic and thermal Energies=      | -1155.202412                |
| Sum of electronic and thermal Enthalpies=    | -1155.201547                |
| Sum of electronic and thermal Free Energies= | -1155.267711                |

Number of Imaginary Frequencies = 1

E (Single Point Energy) [IEFPCM<sub>(DCM)</sub>M06-2X/6-311++G(2d,2p)] = -1155.962553

|   |             |             |            |
|---|-------------|-------------|------------|
| C | -0.58752700 | 0.40228300  | 0.70680200 |
| H | -0.86389100 | -0.33337100 | 1.45527400 |
| C | 0.74214500  | 0.69983000  | 0.44498600 |
| N | 1.72448000  | -0.15779100 | 0.72740000 |
| C | 3.12704100  | 0.05108300  | 0.36163200 |
| H | 3.43648800  | 1.08082300  | 0.56414700 |
| C | 1.53647700  | -1.33654300 | 1.59399600 |
| H | 0.68113400  | -1.92173000 | 1.25410100 |

|   |             |             |             |
|---|-------------|-------------|-------------|
| H | 1.36364300  | -0.99552600 | 2.62360000  |
| C | 2.86313600  | -2.07630200 | 1.45131100  |
| H | 2.83646700  | -2.71019100 | 0.55866800  |
| H | 3.07862800  | -2.70502500 | 2.31620300  |
| C | 3.87414900  | -0.94054400 | 1.27235700  |
| H | 4.07701100  | -0.45875800 | 2.23306100  |
| H | 4.82206700  | -1.25081300 | 0.83166300  |
| C | 1.06605400  | 1.93615500  | -0.35729900 |
| H | 1.68014200  | 2.62068800  | 0.24620800  |
| H | 1.63328800  | 1.67406200  | -1.25600500 |
| O | -1.57897300 | 1.34276200  | 0.48868300  |
| O | -0.11184900 | 2.56406400  | -0.81341500 |
| C | -1.13403600 | 2.65803000  | 0.16290200  |
| C | -2.30126200 | 3.34939000  | -0.50576300 |
| H | -3.16166100 | 3.35107100  | 0.16627000  |
| H | -2.55976100 | 2.81547500  | -1.42291500 |
| C | -0.66419900 | 3.37837100  | 1.42325000  |
| H | -0.21343100 | 4.33669900  | 1.15272000  |
| H | 0.06394400  | 2.79017100  | 1.98735200  |
| H | -1.52455000 | 3.56033800  | 2.07030600  |
| C | -0.68670800 | -0.89982600 | -0.98786700 |
| H | -0.91121900 | -0.03112700 | -1.62701200 |
| C | -1.90128300 | -1.72825800 | -0.57392200 |
| O | 0.38761700  | -1.55370900 | -1.13865000 |
| C | 3.46052500  | -0.20303400 | -1.12286400 |
| O | 2.55240700  | -0.70902700 | -1.91532100 |
| O | 4.57907500  | 0.08768800  | -1.50908500 |
| H | -2.03203000 | 4.37939300  | -0.74852100 |

|   |             |             |             |
|---|-------------|-------------|-------------|
| C | -3.21229800 | -1.01639000 | -0.31679100 |
| H | -3.14095100 | -0.43825800 | 0.60962600  |
| C | -4.38817200 | -1.99064700 | -0.23740300 |
| H | -4.46841400 | -2.53982300 | -1.18374100 |
| H | -4.18854600 | -2.73428400 | 0.54256400  |
| H | -3.37767200 | -0.29296400 | -1.12546400 |
| C | -5.70356500 | -1.27325300 | 0.05673700  |
| H | -5.92825000 | -0.53640300 | -0.72149100 |
| H | -6.53865900 | -1.97708400 | 0.10562600  |
| H | -5.65260200 | -0.74349000 | 1.01354500  |
| H | 1.61749600  | -1.00529600 | -1.51464600 |
| H | -2.02676800 | -2.45985800 | -1.38563000 |
| F | -1.54914900 | -2.47627500 | 0.55918000  |

(S)-TS1<sub>0</sub>-F-P

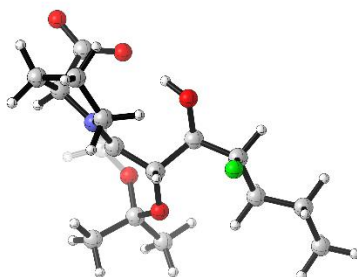

-----  
- Thermochemistry -  
-----

|                                              |                             |
|----------------------------------------------|-----------------------------|
| Zero-point correction=                       | 0.421565 (Hartree/Particle) |
| Thermal correction to Energy=                | 0.441354                    |
| Thermal correction to Enthalpy=              | 0.442219                    |
| Thermal correction to Gibbs Free Energy=     | 0.374972                    |
| Sum of electronic and zero-point Energies=   | -1155.246431                |
| Sum of electronic and thermal Energies=      | -1155.226642                |
| Sum of electronic and thermal Enthalpies=    | -1155.225777                |
| Sum of electronic and thermal Free Energies= | -1155.293024                |

Number of Imaginary Frequencies = 0

E (Single Point Energy) [IEFPCM<sub>(DCM)</sub>M06-2X/6-311++G(2d,2p)] = -1155.990751

|   |             |             |             |
|---|-------------|-------------|-------------|
| C | -0.45145900 | 0.08783400  | 0.60117100  |
| H | -0.44421300 | -0.48930500 | 1.52865600  |
| C | 0.92327800  | 0.59332800  | 0.26879600  |
| N | 1.98325400  | -0.00794000 | 0.67077100  |
| C | 3.32380800  | 0.26614500  | 0.11760700  |
| H | 3.48410800  | 1.34422300  | 0.03995500  |
| C | 2.02832500  | -1.15785500 | 1.62639100  |
| H | 1.27622500  | -1.89286500 | 1.34545300  |
| H | 1.81711100  | -0.75389600 | 2.62092200  |
| C | 3.46454400  | -1.66503600 | 1.50443900  |
| H | 3.52782700  | -2.41540300 | 0.71063000  |
| H | 3.80352600  | -2.11856600 | 2.43625100  |
| C | 4.25736900  | -0.41445900 | 1.11557800  |
| H | 4.41771600  | 0.22957000  | 1.98551500  |
| H | 5.21848400  | -0.63219900 | 0.65081700  |
| C | 0.99407100  | 1.75583400  | -0.68347600 |
| H | 1.63376600  | 2.54733500  | -0.26973300 |
| H | 1.42720200  | 1.41325800  | -1.62888400 |
| O | -1.40532300 | 1.11630100  | 0.75585900  |
| O | -0.30437600 | 2.22215900  | -0.96527800 |
| C | -1.11900600 | 2.39621100  | 0.18009000  |
| C | -2.43600900 | 2.95537100  | -0.31186600 |
| H | -3.15565400 | 2.97084100  | 0.50915800  |
| H | -2.81935200 | 2.32196200  | -1.11480700 |
| C | -0.46220500 | 3.28121000  | 1.23531300  |

|   |             |             |             |
|---|-------------|-------------|-------------|
| H | -0.14191900 | 4.22604300  | 0.78840900  |
| H | 0.39936700  | 2.79809500  | 1.70511400  |
| H | -1.19122300 | 3.48792000  | 2.02104100  |
| C | -0.84558200 | -0.87209300 | -0.57549800 |
| H | -0.99389500 | -0.25884200 | -1.47622500 |
| C | -2.14900600 | -1.61176800 | -0.27744200 |
| O | 0.14215300  | -1.85310800 | -0.76036500 |
| C | 3.44256300  | -0.35270400 | -1.33024500 |
| O | 2.39427800  | -0.82096400 | -1.84766600 |
| O | 4.58235800  | -0.28354100 | -1.80715900 |
| H | -2.29365000 | 3.97147500  | -0.68583200 |
| C | -3.43625900 | -0.81172100 | -0.31419900 |
| H | -3.43103700 | -0.07512100 | 0.49451100  |
| C | -4.67230700 | -1.70595700 | -0.21398400 |
| H | -4.66917900 | -2.42425200 | -1.04334200 |
| H | -4.61983600 | -2.29144800 | 0.71071700  |
| H | -3.46088000 | -0.25062600 | -1.25754100 |
| C | -5.96518900 | -0.89365300 | -0.23844100 |
| H | -6.04542000 | -0.31532700 | -1.16490800 |
| H | -6.84381000 | -1.54042000 | -0.16818100 |
| H | -5.99764000 | -0.18898300 | 0.59902000  |
| H | 0.94076200  | -1.47868100 | -1.20478000 |
| H | -2.19582900 | -2.44255700 | -0.99155600 |
| F | -2.01996400 | -2.20417300 | 0.99285500  |

(R)-TS1<sub>T</sub>-F-Pre

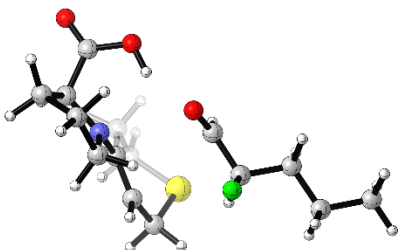

-----  
- Thermochemistry -  
-----

|                                              |                             |
|----------------------------------------------|-----------------------------|
| Zero-point correction=                       | 0.383204 (Hartree/Particle) |
| Thermal correction to Energy=                | 0.402801                    |
| Thermal correction to Enthalpy=              | 0.403666                    |
| Thermal correction to Gibbs Free Energy=     | 0.334681                    |
| Sum of electronic and zero-point Energies=   | -1363.741005                |
| Sum of electronic and thermal Energies=      | -1363.721408                |
| Sum of electronic and thermal Enthalpies=    | -1363.720543                |
| Sum of electronic and thermal Free Energies= | -1363.789529                |

Number of Imaginary Frequencies = 0

E (Single Point Energy) [IEFPCM(DCM)M06-2X/6-311++G(2d,2p)] = -1364.424378

|   |             |             |             |
|---|-------------|-------------|-------------|
| C | -0.09201800 | 1.19348300  | -1.51712000 |
| H | 0.04868600  | 0.50188800  | -2.34230800 |
| C | -1.08327000 | 0.96460900  | -0.62651400 |
| N | -1.83686500 | -0.20664600 | -0.66356000 |
| C | -3.19013900 | -0.29034200 | -0.12129200 |
| H | -3.76562000 | 0.62999800  | -0.25925400 |
| C | -1.61923700 | -1.19780700 | -1.71804800 |
| H | -0.58651700 | -1.55735700 | -1.68326100 |
| H | -1.80700600 | -0.76167700 | -2.71217700 |

|   |             |             |             |
|---|-------------|-------------|-------------|
| C | -2.64350000 | -2.27668200 | -1.38860900 |
| H | -2.26444200 | -2.91709100 | -0.58463800 |
| H | -2.88043600 | -2.90642200 | -2.24781300 |
| C | -3.84075400 | -1.45214200 | -0.91018200 |
| H | -4.37387400 | -1.03325300 | -1.76813800 |
| H | -4.55688900 | -2.01078200 | -0.30443700 |
| C | -1.38207000 | 1.87479500  | 0.54759100  |
| H | -2.45997400 | 2.06794100  | 0.59763000  |
| H | -1.11974200 | 1.35014000  | 1.47638300  |
| C | 1.13237500  | -0.71984100 | 0.70138000  |
| H | 1.03195900  | 0.15350000  | 1.37056400  |
| C | 2.39078100  | -0.74228800 | -0.12951900 |
| O | 0.30826500  | -1.61071700 | 0.68364400  |
| C | -3.22185100 | -0.59490700 | 1.37838600  |
| O | -2.14270800 | -1.15829100 | 1.91364500  |
| O | -4.20824800 | -0.37537400 | 2.04805800  |
| C | 3.61375400  | -0.97593000 | 0.74817300  |
| H | 3.62532200  | -0.20667600 | 1.53081200  |
| C | 4.91781300  | -0.92762300 | -0.04728000 |
| H | 4.88025000  | -1.67586700 | -0.84586200 |
| H | 5.00477800  | 0.05251800  | -0.53197000 |
| H | 2.47663900  | 0.21380800  | -0.66147500 |
| H | 3.50410700  | -1.94749500 | 1.24600800  |
| C | 6.13312100  | -1.17771300 | 0.84254600  |
| H | 6.19799300  | -0.42671600 | 1.63645200  |
| H | 6.07293000  | -2.16273400 | 1.31619000  |
| H | 7.05987300  | -1.13836200 | 0.26433100  |
| H | -1.40188300 | -1.24420500 | 1.27085900  |

|   |             |             |             |
|---|-------------|-------------|-------------|
| C | -0.67716400 | 3.22540300  | 0.50574000  |
| C | 0.86558200  | 2.35493600  | -1.49517700 |
| H | -1.11345500 | 3.86888400  | -0.26461600 |
| H | -0.77924800 | 3.73252600  | 1.46671400  |
| H | 1.85430300  | 2.03714100  | -1.84010200 |
| H | 0.54425600  | 3.15729400  | -2.17025800 |
| S | 1.09976000  | 3.06317600  | 0.16348500  |
| F | 2.28787500  | -1.74821600 | -1.07929900 |

(R)-TS1<sub>T</sub>-F

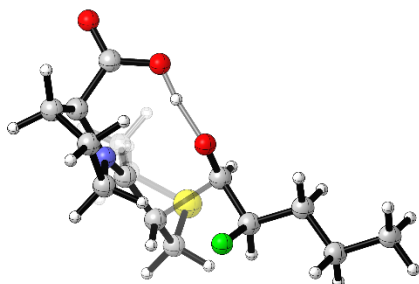

-----  
- Thermochemistry -  
-----

|                                              |                             |
|----------------------------------------------|-----------------------------|
| Zero-point correction=                       | 0.383176 (Hartree/Particle) |
| Thermal correction to Energy=                | 0.401127                    |
| Thermal correction to Enthalpy=              | 0.401992                    |
| Thermal correction to Gibbs Free Energy=     | 0.338653                    |
| Sum of electronic and zero-point Energies=   | -1363.732980                |
| Sum of electronic and thermal Energies=      | -1363.715029                |
| Sum of electronic and thermal Enthalpies=    | -1363.714164                |
| Sum of electronic and thermal Free Energies= | -1363.777503                |

Number of Imaginary Frequencies = 1

E (Single Point Energy) [IEFPCM(DCM)M06-2X/6-311++G(2d,2p)] = -1364.414632

|   |             |            |             |
|---|-------------|------------|-------------|
| C | 0.08134300  | 1.15049800 | -1.12315300 |
| H | 0.47068800  | 0.53827400 | -1.93191900 |
| C | -1.17308000 | 0.81690100 | -0.61974100 |



|   |             |             |             |
|---|-------------|-------------|-------------|
| N | -1.65918300 | -0.42377600 | -0.78693100 |
| C | -2.89563400 | -0.92522500 | -0.17905400 |
| H | -3.73096300 | -0.24254200 | -0.34946000 |
| C | -1.06125700 | -1.41343900 | -1.70624400 |
| H | 0.01943000  | -1.44754400 | -1.58071600 |
| H | -1.30333400 | -1.12994500 | -2.73939800 |
| C | -1.73773400 | -2.71670300 | -1.29975600 |
| H | -1.21359100 | -3.14554600 | -0.43913300 |
| H | -1.73896700 | -3.45058000 | -2.10708500 |
| C | -3.14291400 | -2.26348500 | -0.90369900 |
| H | -3.74615300 | -2.07541100 | -1.79640200 |
| H | -3.67962300 | -2.97032200 | -0.26923700 |
| C | -1.94727500 | 1.72926500  | 0.30776900  |
| H | -3.01866300 | 1.59578800  | 0.13182700  |
| H | -1.75437800 | 1.41449200  | 1.34250600  |
| C | 1.11866300  | 0.03795800  | 0.45709000  |
| H | 1.05665500  | 0.91720100  | 1.11645500  |
| C | 2.44888500  | -0.12043500 | -0.25974100 |
| O | 0.48587200  | -1.01705400 | 0.73270200  |
| C | -2.82984700 | -1.13132200 | 1.34463700  |
| O | -1.66554200 | -1.17314300 | 1.94492400  |
| O | -3.87626200 | -1.27480500 | 1.95136400  |
| C | 3.49203000  | -0.68926900 | 0.69002900  |
| H | 3.55520000  | -0.02728000 | 1.56341900  |
| C | 4.86895100  | -0.82826300 | 0.04205500  |
| H | 4.78741300  | -1.46727500 | -0.84369000 |
| H | 5.20507900  | 0.15636700  | -0.30618700 |
| H | 2.79229400  | 0.82726600  | -0.68577200 |

|   |             |             |             |
|---|-------------|-------------|-------------|
| H | 3.13031000  | -1.66146600 | 1.04574500  |
| C | 5.89537600  | -1.41292100 | 1.01018500  |
| H | 6.00568700  | -0.77665000 | 1.89432400  |
| H | 5.58744900  | -2.40706700 | 1.34967300  |
| H | 6.87677800  | -1.50730000 | 0.53787500  |
| H | -0.79970500 | -1.06031100 | 1.37065800  |
| C | -1.62818200 | 3.21180600  | 0.15934000  |
| C | 0.63339100  | 2.55659000  | -1.11490700 |
| H | -1.96564100 | 3.58896200  | -0.81093900 |
| H | -2.14067600 | 3.77847900  | 0.93845100  |
| H | 1.72668600  | 2.53770900  | -1.11144200 |
| H | 0.33644400  | 3.09660000  | -2.02139800 |
| S | 0.14583900  | 3.54310000  | 0.33037200  |
| F | 2.28151100  | -1.01075400 | -1.32626200 |

**(R)-TS1<sub>T</sub>-F-P**

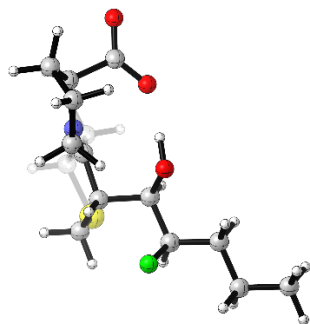

-----  
 - Thermochemistry -  
 -----

|                                            |                             |
|--------------------------------------------|-----------------------------|
| Zero-point correction=                     | 0.387768 (Hartree/Particle) |
| Thermal correction to Energy=              | 0.405714                    |
| Thermal correction to Enthalpy=            | 0.406579                    |
| Thermal correction to Gibbs Free Energy=   | 0.342962                    |
| Sum of electronic and zero-point Energies= | -1363.760167                |
| Sum of electronic and thermal Energies=    | -1363.742222                |
| Sum of electronic and thermal Enthalpies=  | -1363.741357                |

Sum of electronic and thermal Free Energies= -1363.804973

Number of Imaginary Frequencies = 0

E (Single Point Energy) [IEFPCM(DCM)M06-2X/6-311++G(2d,2p)] = -1364.445963

|   |             |             |             |
|---|-------------|-------------|-------------|
| C | 0.28875200  | 0.79294200  | -0.85772200 |
| H | 0.32538200  | 0.24326800  | -1.79934800 |
| C | -1.11260900 | 0.79355300  | -0.31036400 |
| N | -1.96061900 | -0.09841200 | -0.70060300 |
| C | -3.23189200 | -0.39471200 | -0.00030600 |
| H | -3.80109800 | 0.51987300  | 0.16472600  |
| C | -1.71808100 | -1.11152900 | -1.77653600 |
| H | -0.70973400 | -1.50791000 | -1.68800000 |
| H | -1.84617300 | -0.60070700 | -2.73566900 |
| C | -2.79815400 | -2.16296700 | -1.53986600 |
| H | -2.44113400 | -2.90492600 | -0.81903000 |
| H | -3.05920800 | -2.67707600 | -2.46559500 |
| C | -3.95099500 | -1.35592700 | -0.94508600 |
| H | -4.47396700 | -0.79610900 | -1.72672400 |
| H | -4.67604200 | -1.95768000 | -0.39715100 |
| C | -1.43636400 | 1.73323500  | 0.82005500  |
| H | -2.50513400 | 1.73968100  | 1.03168600  |
| H | -0.94427300 | 1.32554500  | 1.71197100  |
| C | 1.13203700  | -0.02995200 | 0.17530100  |
| H | 1.13270000  | 0.49530900  | 1.14090600  |
| C | 2.58810900  | -0.11431100 | -0.26570600 |
| O | 0.60840600  | -1.32659600 | 0.30590500  |
| C | -2.92454600 | -1.05197900 | 1.39531100  |
| O | -1.71551300 | -1.20091400 | 1.71671600  |
| O | -3.93987300 | -1.35123900 | 2.04080400  |

|   |             |             |             |
|---|-------------|-------------|-------------|
| C | 3.40619900  | -1.11181000 | 0.52758900  |
| H | 3.28042000  | -0.87866900 | 1.59297800  |
| C | 4.88874400  | -1.08578000 | 0.15840300  |
| H | 4.99763600  | -1.28499800 | -0.91342500 |
| H | 5.28998000  | -0.07989600 | 0.33552900  |
| H | 3.04253200  | 0.88202500  | -0.20594800 |
| H | 2.98361400  | -2.10909600 | 0.36791100  |
| C | 5.69213900  | -2.10919200 | 0.95816000  |
| H | 5.61226500  | -1.91454600 | 2.03271700  |
| H | 5.32239600  | -3.12311500 | 0.77428200  |
| H | 6.75132200  | -2.08263700 | 0.68846600  |
| H | -0.21566000 | -1.30993100 | 0.84903600  |
| C | -0.97063000 | 3.17477100  | 0.58588000  |
| C | 0.81804600  | 2.20328200  | -1.15078600 |
| H | -1.50416500 | 3.62477800  | -0.25674700 |
| H | -1.19175700 | 3.76446500  | 1.47677500  |
| H | 1.84147400  | 2.14334400  | -1.52455500 |
| H | 0.21457200  | 2.66066900  | -1.94083900 |
| S | 0.81558800  | 3.30230100  | 0.29301200  |
| F | 2.62225300  | -0.47859400 | -1.62569900 |

(S)-TS1<sub>T</sub>-F-Pre

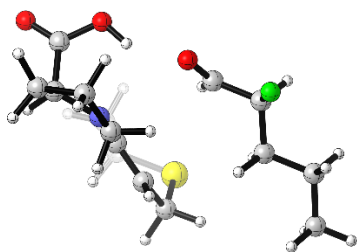

-----  
- Thermochemistry -

```

-----
Zero-point correction=                0.383296 (Hartree/Particle)
Thermal correction to Energy=         0.402792
Thermal correction to Enthalpy=       0.403657
Thermal correction to Gibbs Free Energy= 0.335908
Sum of electronic and zero-point Energies= -1363.741222
Sum of electronic and thermal Energies= -1363.721726
Sum of electronic and thermal Enthalpies= -1363.720861
Sum of electronic and thermal Free Energies= -1363.788610

```

Number of Imaginary Frequencies = 0

E (Single Point Energy) [IEFPCM(DCM)M06-2X/6-311++G(2d,2p)] = -1364.424621

|   |             |             |             |
|---|-------------|-------------|-------------|
| C | 0.41756400  | 1.05646300  | -1.33289900 |
| H | 0.61072800  | 0.32604600  | -2.11295100 |
| C | -0.72746600 | 0.97158000  | -0.62260900 |
| N | -1.60135700 | -0.10921400 | -0.76794700 |
| C | -3.04414700 | 0.03374000  | -0.57885900 |
| H | -3.42541400 | 1.00587100  | -0.90776300 |
| C | -1.29702500 | -1.18308800 | -1.71240600 |
| H | -0.35129800 | -1.66158400 | -1.43884300 |
| H | -1.20860300 | -0.79695300 | -2.74069600 |
| C | -2.50412100 | -2.10277600 | -1.58044300 |
| H | -2.40716000 | -2.71864800 | -0.67972800 |
| H | -2.62476400 | -2.76416100 | -2.44008300 |
| C | -3.65338700 | -1.10180900 | -1.43758100 |
| H | -3.91773100 | -0.69389300 | -2.41700400 |
| H | -4.55700000 | -1.51850200 | -0.98825500 |
| C | -1.11506600 | 1.95281300  | 0.46462300  |
| H | -2.16365900 | 2.24805500  | 0.33909500  |
| H | -1.05291200 | 1.44471900  | 1.43664300  |
| C | 0.88471900  | -1.09883300 | 1.36480600  |
| H | 0.83713000  | -0.05342700 | 1.72189300  |

|   |             |             |             |
|---|-------------|-------------|-------------|
| C | 2.27761700  | -1.63352300 | 1.14263800  |
| O | -0.11624400 | -1.75714700 | 1.17824500  |
| C | -3.47569000 | -0.12857600 | 0.87955100  |
| O | -2.64939100 | -0.78262700 | 1.68926500  |
| O | -4.54729600 | 0.27888700  | 1.27429100  |
| C | 3.05886900  | -0.76647400 | 0.16850200  |
| H | 2.55100100  | -0.79822300 | -0.80432300 |
| C | 4.51729200  | -1.19542700 | 0.02404300  |
| H | 5.00164000  | -1.16039900 | 1.00750300  |
| H | 4.55721500  | -2.23631300 | -0.31400100 |
| H | 2.78393800  | -1.66471400 | 2.11831300  |
| H | 3.00421600  | 0.26957700  | 0.52898300  |
| C | 5.26743000  | -0.29856500 | -0.95810600 |
| H | 4.80407900  | -0.33427300 | -1.94966000 |
| H | 5.25804000  | 0.74324500  | -0.62039300 |
| H | 6.31008700  | -0.60922200 | -1.06278300 |
| H | -1.80117900 | -1.01873700 | 1.24707100  |
| C | -0.28114300 | 3.22725400  | 0.49792600  |
| C | 1.48579600  | 2.10503200  | -1.17266700 |
| H | -0.51404800 | 3.86847200  | -0.35795900 |
| H | -0.48937900 | 3.79078800  | 1.40907000  |
| H | 2.47534100  | 1.66033900  | -1.31525000 |
| H | 1.38498300  | 2.89752200  | -1.92399600 |
| S | 1.50090600  | 2.87553100  | 0.47417800  |
| F | 2.19619400  | -2.93437200 | 0.67115300  |

(S)-TS1<sub>T-F</sub>

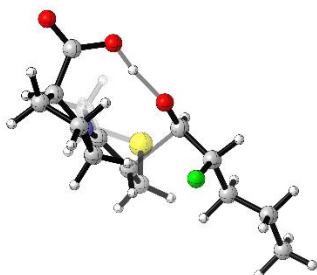

-----  
- Thermochemistry -  
-----

|                                              |                             |
|----------------------------------------------|-----------------------------|
| Zero-point correction=                       | 0.383310 (Hartree/Particle) |
| Thermal correction to Energy=                | 0.401139                    |
| Thermal correction to Enthalpy=              | 0.402004                    |
| Thermal correction to Gibbs Free Energy=     | 0.339218                    |
| Sum of electronic and zero-point Energies=   | -1363.727183                |
| Sum of electronic and thermal Energies=      | -1363.709355                |
| Sum of electronic and thermal Enthalpies=    | -1363.708490                |
| Sum of electronic and thermal Free Energies= | -1363.771275                |

Number of Imaginary Frequencies = 1

E (Single Point Energy) [IEFPCM<sub>(DCM)</sub>M06-2X/6-311++G(2d,2p)] = -1364.408701

|   |             |             |             |
|---|-------------|-------------|-------------|
| C | 0.57604500  | 0.65114800  | -0.90257500 |
| H | 0.92044200  | -0.17977500 | -1.51465700 |
| C | -0.80229700 | 0.75691300  | -0.69940200 |
| N | -1.59008900 | -0.32083100 | -0.81581900 |
| C | -3.02596100 | -0.34688600 | -0.51120100 |
| H | -3.55025700 | 0.47438800  | -1.00446700 |
| C | -1.13421700 | -1.60079000 | -1.39383700 |
| H | -0.17059000 | -1.88474600 | -0.97661100 |
| H | -1.04590900 | -1.48618600 | -2.48252300 |
| C | -2.24482800 | -2.57076700 | -1.01135000 |

|   |             |             |             |
|---|-------------|-------------|-------------|
| H | -2.07950600 | -2.92798600 | 0.01060300  |
| H | -2.28767300 | -3.43288400 | -1.67861500 |
| C | -3.49799100 | -1.69891300 | -1.08229500 |
| H | -3.80149100 | -1.55621000 | -2.12327200 |
| H | -4.35040700 | -2.09223400 | -0.52674800 |
| C | -1.44773300 | 1.99730700  | -0.11526200 |
| H | -2.45992300 | 2.10221200  | -0.51575700 |
| H | -1.55075500 | 1.84389200  | 0.96762400  |
| C | 0.90185200  | -0.36793200 | 1.01691600  |
| H | 1.08469400  | 0.61415900  | 1.47845600  |
| C | 2.15440200  | -1.20235000 | 0.75324400  |
| O | -0.12867100 | -1.03550300 | 1.30967300  |
| C | -3.37791700 | -0.23045000 | 0.98237200  |
| O | -2.44730900 | -0.41283400 | 1.88643700  |
| O | -4.53395000 | 0.00904000  | 1.28158200  |
| C | 3.40809900  | -0.52226900 | 0.24845800  |
| H | 3.27493300  | -0.27257500 | -0.81040100 |
| C | 4.64753100  | -1.40446600 | 0.40678100  |
| H | 4.79502500  | -1.62877000 | 1.47016000  |
| H | 4.47309800  | -2.36157400 | -0.09747200 |
| H | 2.36083000  | -1.68250300 | 1.72176800  |
| H | 3.54942700  | 0.41589200  | 0.80105300  |
| C | 5.89872900  | -0.73896800 | -0.16102900 |
| H | 5.78081200  | -0.53510000 | -1.23025200 |
| H | 6.09673900  | 0.21337800  | 0.34174000  |
| H | 6.77844100  | -1.37542900 | -0.03518200 |
| H | -1.47499200 | -0.61703000 | 1.56677100  |
| C | -0.70552400 | 3.30312200  | -0.36774400 |



|   |             |             |             |
|---|-------------|-------------|-------------|
| C | 1.45989100  | 1.87888200  | -0.99402200 |
| H | -0.73134000 | 3.57131300  | -1.42837600 |
| H | -1.17886600 | 4.10848100  | 0.19624500  |
| H | 2.49835700  | 1.62906100  | -0.78172500 |
| H | 1.43843000  | 2.29354600  | -2.00902500 |
| S | 1.02330600  | 3.20526200  | 0.16545500  |
| F | 1.82301800  | -2.24208900 | -0.12352600 |

(S)-TS1<sub>T</sub>-F-P

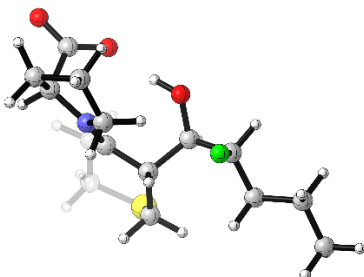

-----  
 - Thermochemistry -  
 -----

|                                              |                             |
|----------------------------------------------|-----------------------------|
| Zero-point correction=                       | 0.387482 (Hartree/Particle) |
| Thermal correction to Energy=                | 0.405341                    |
| Thermal correction to Enthalpy=              | 0.406206                    |
| Thermal correction to Gibbs Free Energy=     | 0.342683                    |
| Sum of electronic and zero-point Energies=   | -1363.755102                |
| Sum of electronic and thermal Energies=      | -1363.737244                |
| Sum of electronic and thermal Enthalpies=    | -1363.736379                |
| Sum of electronic and thermal Free Energies= | -1363.799902                |

Number of Imaginary Frequencies = 0

E (Single Point Energy) [IEFPCM<sub>(DCM)</sub>M06-2X/6-311++G(2d,2p)] = -1364.440624

|   |             |             |             |
|---|-------------|-------------|-------------|
| C | 0.57321900  | 0.39685200  | -0.59771400 |
| H | 0.72367700  | -0.37445800 | -1.35789700 |
| C | -0.90361400 | 0.67736600  | -0.47887600 |
| N | -1.74581900 | -0.25594100 | -0.77343500 |

|   |             |             |             |
|---|-------------|-------------|-------------|
| C | -3.19890600 | -0.19789700 | -0.48200900 |
| H | -3.62182200 | 0.72531000  | -0.87951500 |
| C | -1.37393200 | -1.61165300 | -1.28667300 |
| H | -0.49183700 | -1.97421700 | -0.76251300 |
| H | -1.16773400 | -1.50905400 | -2.35682600 |
| C | -2.62238700 | -2.44797600 | -1.02787900 |
| H | -2.59858600 | -2.84097300 | -0.00667600 |
| H | -2.68867600 | -3.28673000 | -1.72178600 |
| C | -3.75626100 | -1.43611400 | -1.18443600 |
| H | -3.93674100 | -1.22224900 | -2.24256300 |
| H | -4.69375000 | -1.74496000 | -0.72222200 |
| C | -1.37206300 | 1.96401700  | 0.14573200  |
| H | -2.44519200 | 2.09497700  | 0.00710900  |
| H | -1.21071000 | 1.84479600  | 1.22549400  |
| C | 1.04829700  | -0.19369800 | 0.78119700  |
| H | 1.30931300  | 0.64800900  | 1.43954800  |
| C | 2.27817800  | -1.09179500 | 0.63447900  |
| O | 0.08961600  | -1.03434500 | 1.37617800  |
| C | -3.45614700 | -0.22928800 | 1.06792400  |
| O | -2.45328100 | -0.25808400 | 1.82827600  |
| O | -4.65831100 | -0.20974200 | 1.37231700  |
| C | 3.58591800  | -0.47781800 | 0.17314000  |
| H | 3.52536700  | -0.26996100 | -0.90192800 |
| C | 4.77521000  | -1.40443000 | 0.43257500  |
| H | 4.86021800  | -1.58339000 | 1.51109700  |
| H | 4.58014000  | -2.37607100 | -0.03520800 |
| H | 2.40983400  | -1.57902400 | 1.60737900  |
| H | 3.73993800  | 0.47798100  | 0.69076700  |

|   |             |             |             |
|---|-------------|-------------|-------------|
| C | 6.08181200  | -0.82333700 | -0.10162900 |
| H | 6.02637400  | -0.66902500 | -1.18414600 |
| H | 6.29822700  | 0.14378200  | 0.36395700  |
| H | 6.92412700  | -1.49010700 | 0.10020800  |
| H | -0.78237800 | -0.61178900 | 1.56339000  |
| C | -0.64601900 | 3.22042800  | -0.33604400 |
| C | 1.36617500  | 1.63112100  | -1.06527200 |
| H | -0.83330400 | 3.40528300  | -1.39785600 |
| H | -1.01646200 | 4.07829900  | 0.22696700  |
| H | 2.43253300  | 1.41588900  | -1.06867100 |
| H | 1.08375000  | 1.86853300  | -2.09575200 |
| S | 1.13920300  | 3.11608300  | -0.05256800 |
| F | 1.94067800  | -2.11932300 | -0.26760900 |

**Supplementary Table 6.** Energies for enamine addition to 2-bromopentanal. Reported energies for structures optimized at the IEFPCM<sub>(DCM)</sub>M06-2X/6-311++G(2d,2p)//IEFPCM<sub>(DCM)</sub>M06-2X/6-31+G(d,p) level of theory represent the sum of the thermal correction to Gibbs Free Energy computed at the IEFPCM<sub>(DCM)</sub>M06-2X/6-31+G(d,p) level of theory and single point energies computed at the IEFPCM<sub>(DCM)</sub>M06-2X/6-311++G(2d,2p). All energies are reported in Hartrees.

| Structure                                 | Single Point Energies, E<br>IEFPCM <sub>(DCM)</sub> M06-2X/6-311++G(2d,2p) | Thermal Corrections to Gibbs Free Energies,<br>IEFPCM <sub>(DCM)</sub> M06-2X/6-31+G(d,p) | Gibbs Free Energies (G),<br>IEFPCM <sub>(DCM)</sub> M06-2X/6-31+G(d,p) | Gibbs Free Energies (G),<br>IEFPCM <sub>(DCM)</sub> M06-2X/6-311++G(2d,2p)//<br>IEFPCM <sub>(DCM)</sub> M06-2X/6-31+G(d,p) |
|-------------------------------------------|----------------------------------------------------------------------------|-------------------------------------------------------------------------------------------|------------------------------------------------------------------------|----------------------------------------------------------------------------------------------------------------------------|
| 2-Bromopentanal                           | -2845.302023                                                               | 0.102041                                                                                  | -2842.756584                                                           | -2845.199982                                                                                                               |
| Enamine of Cyclohexanone (G)              | -634.55147535                                                              | 0.238392                                                                                  | -634.142903                                                            | -634.3130834                                                                                                               |
| Enamine of Dioxane (O)                    | -784.98483791                                                              | 0.244077                                                                                  | -784.522619                                                            | -784.7407609                                                                                                               |
| Enamine of Tetrahydro-4H-thiopyranone (T) | -993.43210840                                                              | 0.210205                                                                                  | -993.028735                                                            | -993.2219034                                                                                                               |
| Enamine of Tetrahydro-4H-pyranone (P)     | -670.45469021                                                              | 0.214793                                                                                  | -670.055312                                                            | -670.2398972                                                                                                               |
| (R)-TS1 <sub>P</sub> -Br-Pre              | -3515.772806                                                               | 0.33702                                                                                   | -3512.817561                                                           | -3515.435786                                                                                                               |
| (R)-TS1 <sub>P</sub> -Br                  | -3515.764676                                                               | 0.339202                                                                                  | -3512.807029                                                           | -3515.425474                                                                                                               |
| (R)-TS1 <sub>P</sub> -Br-P                | -3515.796502                                                               | 0.343987                                                                                  | -3512.8352                                                             | -3515.452515                                                                                                               |
| (S)-TS1 <sub>P</sub> -Br-Pre              | -3515.773376                                                               | 0.336209                                                                                  | -3512.816466                                                           | -3515.437167                                                                                                               |
| (S)-TS1 <sub>P</sub> -Br                  | -3515.755215                                                               | 0.339792                                                                                  | -3512.797441                                                           | -3515.415423                                                                                                               |
| (S)-TS1 <sub>P</sub> -Br-P                | -3515.791108                                                               | 0.343838                                                                                  | -3512.829276                                                           | -3515.44727                                                                                                                |
| (R)-TS1 <sub>G</sub> -Br-Pre              | -3479.870718                                                               | 0.360463                                                                                  | -3476.904554                                                           | -3479.510255                                                                                                               |
| (R)-TS1 <sub>G</sub> -Br                  | -3479.861538                                                               | 0.363361                                                                                  | -3476.894285                                                           | -3479.498177                                                                                                               |
| (R)-TS1 <sub>G</sub> -Br-P                | -3479.895319                                                               | 0.367485                                                                                  | -3476.924713                                                           | -3479.527834                                                                                                               |
| (S)-TS1 <sub>G</sub> -Br-Pre              | -3479.870083                                                               | 0.359689                                                                                  | -3476.903689                                                           | -3479.510394                                                                                                               |
| (S)-TS1 <sub>G</sub> -Br                  | -3479.855148                                                               | 0.363834                                                                                  | -3476.887892                                                           | -3479.491314                                                                                                               |
| (S)-TS1 <sub>G</sub> -Br-P                | -3479.890591                                                               | 0.367929                                                                                  | -3476.919777                                                           | -3479.522662                                                                                                               |

|                              |              |          |              |              |
|------------------------------|--------------|----------|--------------|--------------|
| (R)-TS1 <sub>O</sub> -Br-Pre | -3630.3055   | 0.366152 | -3627.287997 | -3629.939348 |
| (R)-TS1 <sub>O</sub> -Br     | -3630.294358 | 0.367844 | -3627.274362 | -3629.926514 |
| (R)-TS1 <sub>O</sub> -Br-P   | -3630.321486 | 0.366131 | -3627.288017 | -3629.955355 |
| (S)-TS1 <sub>O</sub> -Br-Pre | -3630.304491 | 0.366172 | -3627.285373 | -3629.938319 |
| (S)-TS1 <sub>O</sub> -Br     | -3630.290158 | 0.367855 | -3627.270827 | -3629.922303 |
| (S)-TS1 <sub>O</sub> -Br-P   | -3630.318696 | 0.372541 | -3627.295449 | -3629.946155 |
| (R)-TS1 <sub>T</sub> -Br-Pre | -3838.753211 | 0.332629 | -3835.791695 | -3838.420582 |
| (R)-TS1 <sub>T</sub> -Br     | -3838.741514 | 0.335333 | -3835.779609 | -3838.406181 |
| (R)-TS1 <sub>T</sub> -Br-P   | -3838.773806 | 0.339578 | -3835.808206 | -3838.43422  |
| (S)-TS1 <sub>T</sub> -Br-Pre | -3838.752357 | 0.33267  | -3835.789922 | -3838.419687 |
| (S)-TS1 <sub>T</sub> -Br     | -3838.735267 | 0.335793 | -3835.77367  | -3838.399474 |
| (S)-TS1 <sub>T</sub> -Br-P   | -3838.769222 | 0.339134 | -3835.804351 | -3838.430088 |

Pre – Precomplex

P – Product

2-Bromopentanal

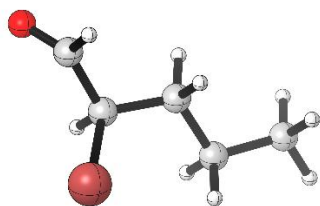

-----  
- Thermochemistry -  
-----

|                                              |                             |
|----------------------------------------------|-----------------------------|
| Zero-point correction=                       | 0.133479 (Hartree/Particle) |
| Thermal correction to Energy=                | 0.140970                    |
| Thermal correction to Enthalpy=              | 0.141835                    |
| Thermal correction to Gibbs Free Energy=     | 0.102041                    |
| Sum of electronic and zero-point Energies=   | -2842.725145                |
| Sum of electronic and thermal Energies=      | -2842.717655                |
| Sum of electronic and thermal Enthalpies=    | -2842.716789                |
| Sum of electronic and thermal Free Energies= | -2842.756584                |

Number of Imaginary Frequencies = 0

E (Single Point Energy) [IEFPCM(DCM)M06-2X/6-311++G(2d,2p)] = -2845.302023

|    |             |             |             |
|----|-------------|-------------|-------------|
| C  | 1.23693100  | 1.54795200  | -0.34621000 |
| H  | 1.33300600  | 1.41009900  | -1.43993900 |
| C  | 0.25532500  | 0.62139900  | 0.33151200  |
| O  | 1.86828400  | 2.38983000  | 0.24705500  |
| C  | -1.13902800 | 0.76859800  | -0.25746500 |
| H  | -1.43667100 | 1.81367500  | -0.09180100 |
| C  | -2.18180100 | -0.15516700 | 0.36870400  |
| H  | -1.92606000 | -1.19509100 | 0.14064600  |
| H  | -2.14420900 | -0.05117200 | 1.45983700  |
| H  | -1.09415100 | 0.61296000  | -1.34243600 |
| C  | -3.58582700 | 0.16153200  | -0.14039800 |
| H  | -3.63780100 | 0.05803700  | -1.22904700 |
| H  | -4.32494700 | -0.51457200 | 0.29680400  |
| H  | -3.87364000 | 1.18651500  | 0.11378600  |
| H  | 0.28586600  | 0.75505500  | 1.41314000  |
| Br | 0.98167800  | -1.16743000 | -0.02955100 |

(*R*)-TS1<sub>p</sub>-Br-Pre

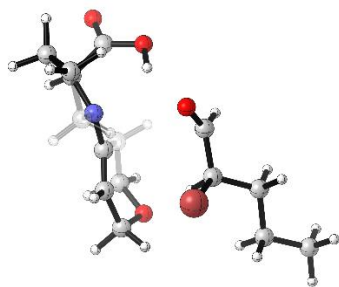

-----  
- Thermochemistry -  
-----

|                                              |                             |
|----------------------------------------------|-----------------------------|
| Zero-point correction=                       | 0.384883 (Hartree/Particle) |
| Thermal correction to Energy=                | 0.404397                    |
| Thermal correction to Enthalpy=              | 0.405262                    |
| Thermal correction to Gibbs Free Energy=     | 0.337020                    |
| Sum of electronic and zero-point Energies=   | -3512.769697                |
| Sum of electronic and thermal Energies=      | -3512.750183                |
| Sum of electronic and thermal Enthalpies=    | -3512.749318                |
| Sum of electronic and thermal Free Energies= | -3512.817561                |

Number of Imaginary Frequencies = 0

E (Single Point Energy) [IEFPCM<sub>(DCM)</sub>M06-2X/6-311++G(2d,2p)] = -3515.772806

|   |             |             |             |
|---|-------------|-------------|-------------|
| C | -0.22947700 | 0.59828800  | -1.86474200 |
| H | -0.22583200 | -0.31834000 | -2.44407100 |
| C | -1.15552000 | 0.82340600  | -0.91501300 |
| N | -2.09640100 | -0.13447000 | -0.52583200 |
| C | -3.43259700 | 0.25565000  | -0.07844900 |
| H | -3.80921700 | 1.15605700  | -0.57400600 |
| C | -2.11815800 | -1.43874600 | -1.18866500 |
| H | -1.16847900 | -1.95277100 | -1.01104500 |
| H | -2.26409000 | -1.32921900 | -2.27542000 |
| C | -3.31873200 | -2.12135700 | -0.54518700 |
| H | -3.04506100 | -2.50944400 | 0.44213300  |
| H | -3.70366100 | -2.94870300 | -1.14379900 |
| C | -4.31934100 | -0.96754200 | -0.42238800 |
| H | -4.80021900 | -0.78607800 | -1.38737100 |
| H | -5.10253300 | -1.13279400 | 0.32041900  |
| C | -1.15339500 | 2.12214700  | -0.14086300 |
| H | -2.16079600 | 2.55125600  | -0.09184300 |
| H | -0.83833800 | 1.94353600  | 0.89682600  |
| C | 0.66603300  | -0.51047100 | 1.48835400  |
| H | 0.52066000  | 0.25922500  | 2.27260100  |

|    |             |             |             |
|----|-------------|-------------|-------------|
| C  | 1.88075700  | -0.26007100 | 0.63844900  |
| O  | -0.13192900 | -1.40929200 | 1.35364000  |
| C  | -3.47762400 | 0.53110600  | 1.42480200  |
| O  | -2.53861500 | -0.06001400 | 2.16440700  |
| O  | -4.34211800 | 1.20803800  | 1.93554500  |
| C  | 3.14691200  | -0.01573000 | 1.45383600  |
| H  | 2.88564400  | 0.69341100  | 2.25136700  |
| C  | 4.28161200  | 0.57026700  | 0.61559100  |
| H  | 4.56684000  | -0.15213200 | -0.15672200 |
| H  | 3.91145700  | 1.46292800  | 0.09538300  |
| H  | 1.64641100  | 0.64801900  | 0.06707500  |
| H  | 3.46315900  | -0.94756900 | 1.93686700  |
| C  | 5.49522800  | 0.92571200  | 1.47000800  |
| H  | 5.23677100  | 1.67255400  | 2.22748300  |
| H  | 5.87928100  | 0.04093000  | 1.98793000  |
| H  | 6.30296200  | 1.33291000  | 0.85652900  |
| H  | -1.90206000 | -0.53819100 | 1.59181000  |
| C  | -0.22336900 | 3.12949900  | -0.80720400 |
| C  | 0.90333900  | 1.55598700  | -2.12356800 |
| H  | -0.67598300 | 3.50592400  | -1.73634500 |
| H  | -0.02483100 | 3.97620500  | -0.14803200 |
| H  | 1.85870500  | 1.01626800  | -2.14476700 |
| H  | 0.78665700  | 2.05784700  | -3.09740600 |
| O  | 1.02944400  | 2.53179400  | -1.09951100 |
| Br | 2.10083100  | -1.66038900 | -0.68334900 |



(R)-TS1p-Br

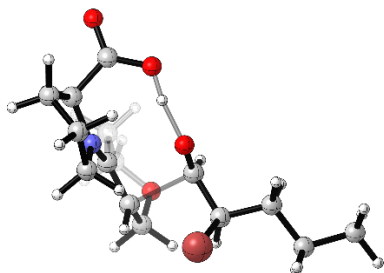

-----  
- Thermochemistry -  
-----

|                                              |                             |
|----------------------------------------------|-----------------------------|
| Zero-point correction=                       | 0.384683 (Hartree/Particle) |
| Thermal correction to Energy=                | 0.402729                    |
| Thermal correction to Enthalpy=              | 0.403594                    |
| Thermal correction to Gibbs Free Energy=     | 0.339202                    |
| Sum of electronic and zero-point Energies=   | -3512.761549                |
| Sum of electronic and thermal Energies=      | -3512.743502                |
| Sum of electronic and thermal Enthalpies=    | -3512.742637                |
| Sum of electronic and thermal Free Energies= | -3512.807029                |

Number of Imaginary Frequencies = 1

E (Single Point Energy) [IEFPCM(DCM)M06-2X/6-311++G(2d,2p)] = -3515.764676

|   |             |             |             |
|---|-------------|-------------|-------------|
| C | -0.26041800 | 1.15309400  | -1.26771500 |
| H | 0.15277600  | 0.40877400  | -1.94194700 |
| C | -1.51527600 | 0.94805900  | -0.71454900 |
| N | -2.06447100 | -0.27279700 | -0.63048100 |
| C | -3.31705000 | -0.57117500 | 0.06648600  |
| H | -4.11474800 | 0.11254600  | -0.23336900 |
| C | -1.53093100 | -1.44975700 | -1.34105200 |

|   |             |             |             |
|---|-------------|-------------|-------------|
| H | -0.45194400 | -1.51466100 | -1.21255100 |
| H | -1.76871800 | -1.36253600 | -2.40983800 |
| C | -2.26920200 | -2.60996000 | -0.68394900 |
| H | -1.75640600 | -2.89134900 | 0.24212000  |
| H | -2.32214300 | -3.48685500 | -1.33089000 |
| C | -3.64363500 | -2.01172000 | -0.37846500 |
| H | -4.24899600 | -1.97067400 | -1.28837500 |
| H | -4.20673900 | -2.55123000 | 0.38450500  |
| C | -2.19477600 | 2.08297400  | 0.01399500  |
| H | -3.27777500 | 2.04343400  | -0.13205900 |
| H | -2.01018200 | 1.97245300  | 1.09184100  |
| C | 0.71020200  | 0.39240100  | 0.57699900  |
| H | 0.53156600  | 1.37388000  | 1.04706900  |
| C | 2.12845000  | 0.25527100  | 0.05199600  |
| O | 0.10522700  | -0.62757200 | 0.98816600  |
| C | -3.23904300 | -0.47710100 | 1.59958200  |
| O | -2.06782300 | -0.48876400 | 2.19185200  |
| O | -4.27888900 | -0.42235300 | 2.23034800  |
| C | 3.07694600  | 0.11885900  | 1.24310700  |
| H | 2.84660300  | 0.94529100  | 1.93070100  |
| C | 4.55618000  | 0.18664500  | 0.87133200  |
| H | 4.81738600  | -0.68060900 | 0.25567300  |
| H | 4.73170600  | 1.07738300  | 0.25535400  |
| H | 2.41464400  | 1.10009200  | -0.57330100 |
| H | 2.84800800  | -0.81366200 | 1.77093600  |
| C | 5.44300000  | 0.23072300  | 2.11366800  |
| H | 5.22475200  | 1.11578100  | 2.71973900  |
| H | 5.27972100  | -0.65260600 | 2.73950700  |

|    |             |             |             |
|----|-------------|-------------|-------------|
| H  | 6.50166100  | 0.25970400  | 1.84293900  |
| H  | -1.21177900 | -0.53284900 | 1.60515800  |
| C  | -1.67083200 | 3.43441700  | -0.46087500 |
| C  | 0.24641900  | 2.56470800  | -1.45509700 |
| H  | -2.04882600 | 3.65515900  | -1.47007400 |
| H  | -1.99532300 | 4.22852300  | 0.21301900  |
| H  | 1.33641600  | 2.60915700  | -1.37658300 |
| H  | -0.01841400 | 2.94030300  | -2.45672000 |
| O  | -0.25593700 | 3.44820900  | -0.47003100 |
| Br | 2.28734900  | -1.32104700 | -1.09128400 |

(*R*)-TS1<sub>p</sub>-Br-P

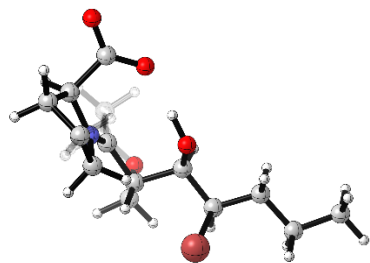

-----  
- Thermochemistry -  
-----

|                                              |                             |
|----------------------------------------------|-----------------------------|
| Zero-point correction=                       | 0.389140 (Hartree/Particle) |
| Thermal correction to Energy=                | 0.407022                    |
| Thermal correction to Enthalpy=              | 0.407887                    |
| Thermal correction to Gibbs Free Energy=     | 0.343987                    |
| Sum of electronic and zero-point Energies=   | -3512.790047                |
| Sum of electronic and thermal Energies=      | -3512.772164                |
| Sum of electronic and thermal Enthalpies=    | -3512.771299                |
| Sum of electronic and thermal Free Energies= | -3512.835200                |

Number of Imaginary Frequencies = 0

E (Single Point Energy) [IEFPCM(DCM)M06-2X/6-311++G(2d,2p)] = -3515.796502

|   |             |            |             |
|---|-------------|------------|-------------|
| C | -0.06786900 | 0.95761600 | -0.90300000 |
|---|-------------|------------|-------------|

|   |             |             |             |
|---|-------------|-------------|-------------|
| H | 0.12297800  | 0.22523600  | -1.69044000 |
| C | -1.50427200 | 0.90155900  | -0.48031700 |
| N | -2.17388600 | -0.19350500 | -0.59695000 |
| C | -3.48552800 | -0.43305300 | 0.04332200  |
| H | -4.17369900 | 0.38001300  | -0.19125600 |
| C | -1.65538100 | -1.44857900 | -1.22203100 |
| H | -0.62238300 | -1.61172200 | -0.91970600 |
| H | -1.71932900 | -1.32066500 | -2.30730100 |
| C | -2.61548400 | -2.52224600 | -0.71881700 |
| H | -2.27019800 | -2.90303800 | 0.24748000  |
| H | -2.67920600 | -3.35746000 | -1.41712800 |
| C | -3.93483300 | -1.76733000 | -0.55249600 |
| H | -4.41054600 | -1.60521300 | -1.52470900 |
| H | -4.64537200 | -2.26086400 | 0.11039800  |
| C | -2.05393100 | 2.11208000  | 0.21044200  |
| H | -3.14380500 | 2.10975200  | 0.24467000  |
| H | -1.69872100 | 2.06229000  | 1.24825200  |
| C | 0.77457100  | 0.57731100  | 0.36286200  |
| H | 0.77250700  | 1.45654900  | 1.02829800  |
| C | 2.24015600  | 0.32284700  | 0.02319000  |
| O | 0.28662500  | -0.55810800 | 1.02158300  |
| C | -3.32147300 | -0.50157500 | 1.60538300  |
| O | -2.17283600 | -0.30236700 | 2.08366700  |
| O | -4.37830900 | -0.74015300 | 2.20759100  |
| C | 3.07104100  | 0.01481400  | 1.25888000  |
| H | 2.83643100  | 0.79769800  | 1.99477200  |
| C | 4.57740600  | 0.00344300  | 1.01195900  |
| H | 4.82882800  | -0.81312600 | 0.32618200  |

|    |             |             |             |
|----|-------------|-------------|-------------|
| H  | 4.87120700  | 0.93617000  | 0.51417600  |
| H  | 2.66490000  | 1.16261500  | -0.52852900 |
| H  | 2.73817500  | -0.93470900 | 1.68860900  |
| C  | 5.35707100  | -0.15611300 | 2.31534600  |
| H  | 5.14883300  | 0.67178200  | 3.00072800  |
| H  | 5.08040500  | -1.08666100 | 2.82156100  |
| H  | 6.43466700  | -0.18015100 | 2.13303700  |
| H  | -0.59682400 | -0.40236000 | 1.43985300  |
| C  | -1.53943600 | 3.40133900  | -0.43980800 |
| C  | 0.27833400  | 2.35273700  | -1.44596300 |
| H  | -1.99784100 | 3.54419800  | -1.42857700 |
| H  | -1.79235100 | 4.25525200  | 0.18887000  |
| H  | 1.35662300  | 2.45595900  | -1.57932800 |
| H  | -0.19666500 | 2.48842200  | -2.42786900 |
| O  | -0.13131700 | 3.37539000  | -0.56386200 |
| Br | 2.36437300  | -1.19436100 | -1.23425500 |

(S)-TS1<sub>P</sub>-Br-Pre

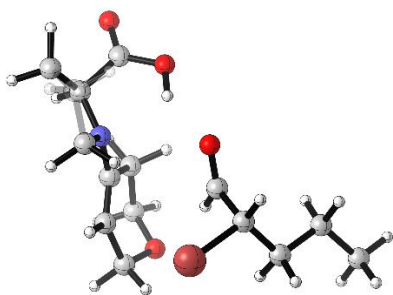

-----  
 - Thermochemistry -  
 -----

|                                          |                             |
|------------------------------------------|-----------------------------|
| Zero-point correction=                   | 0.384990 (Hartree/Particle) |
| Thermal correction to Energy=            | 0.404613                    |
| Thermal correction to Enthalpy=          | 0.405478                    |
| Thermal correction to Gibbs Free Energy= | 0.336209                    |

|                                              |              |
|----------------------------------------------|--------------|
| Sum of electronic and zero-point Energies=   | -3512.767685 |
| Sum of electronic and thermal Energies=      | -3512.748062 |
| Sum of electronic and thermal Enthalpies=    | -3512.747197 |
| Sum of electronic and thermal Free Energies= | -3512.816466 |

Number of Imaginary Frequencies = 0

E (Single Point Energy) [IEFPCM(DCM)M06-2X/6-311++G(2d,2p)] = -3515.773376

|   |             |             |             |
|---|-------------|-------------|-------------|
| C | 0.47508000  | -0.52059900 | 1.95928600  |
| H | 0.42906800  | -1.60346700 | 1.91770500  |
| C | 1.34351400  | 0.17402800  | 1.20255300  |
| N | 2.13940500  | -0.41512100 | 0.21736000  |
| C | 3.48530500  | 0.07693200  | -0.07345600 |
| H | 3.98151500  | 0.50674400  | 0.80319400  |
| C | 2.03723500  | -1.85318300 | -0.03195100 |
| H | 1.02805300  | -2.09656400 | -0.38038300 |
| H | 2.23673900  | -2.43153200 | 0.88445800  |
| C | 3.12898900  | -2.09666000 | -1.06676100 |
| H | 2.78296300  | -1.78789900 | -2.05918500 |
| H | 3.43493000  | -3.14300800 | -1.11726800 |
| C | 4.24659700  | -1.17497200 | -0.57007500 |
| H | 4.75775400  | -1.63405800 | 0.28070500  |
| H | 4.99492800  | -0.92736900 | -1.32502900 |
| C | 1.38904400  | 1.68209500  | 1.28618300  |
| H | 2.42145300  | 2.04123700  | 1.37344200  |
| H | 0.98073900  | 2.11409200  | 0.36165400  |
| C | -1.13581800 | 0.33111500  | -0.78864100 |
| H | -1.10191000 | 0.91697500  | 0.14949200  |
| C | -2.41223200 | -0.44240900 | -1.01653800 |
| O | -0.21072900 | 0.31928700  | -1.57247100 |
| C | 3.49831900  | 1.16206800  | -1.15368000 |

|    |             |             |             |
|----|-------------|-------------|-------------|
| O  | 2.38342700  | 1.33209500  | -1.85634400 |
| O  | 4.49318000  | 1.81491400  | -1.38618000 |
| C  | -3.63716500 | 0.38060100  | -0.65910200 |
| H  | -4.52708600 | -0.25278700 | -0.73094300 |
| C  | -3.77912100 | 1.59307700  | -1.58423500 |
| H  | -2.91104400 | 2.25439400  | -1.46852100 |
| H  | -3.77923400 | 1.25456700  | -2.62723300 |
| H  | -2.44152300 | -0.84625000 | -2.02882600 |
| H  | -3.55347500 | 0.70789500  | 0.38530700  |
| C  | -5.05943900 | 2.37277000  | -1.29193600 |
| H  | -5.06934000 | 2.73188000  | -0.25815200 |
| H  | -5.15181700 | 3.23890200  | -1.95179300 |
| H  | -5.94000700 | 1.73950500  | -1.43747600 |
| H  | 1.65568600  | 0.76895100  | -1.51065000 |
| C  | 0.58838800  | 2.17115900  | 2.48730000  |
| C  | -0.55284500 | 0.16129400  | 2.82360200  |
| H  | 1.12853300  | 1.95653200  | 3.42137700  |
| H  | 0.40991300  | 3.24615700  | 2.42705300  |
| H  | -1.54004700 | -0.28143900 | 2.65183500  |
| H  | -0.31691900 | 0.04397900  | 3.89404600  |
| O  | -0.68192600 | 1.54132400  | 2.51859800  |
| Br | -2.24149800 | -1.99361300 | 0.17313000  |

(S)-TS1<sub>P</sub>-Br

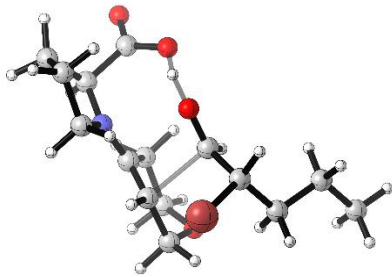

-----  
 - Thermochemistry -  
 -----

|                                              |                             |
|----------------------------------------------|-----------------------------|
| Zero-point correction=                       | 0.385076 (Hartree/Particle) |
| Thermal correction to Energy=                | 0.402978                    |
| Thermal correction to Enthalpy=              | 0.403843                    |
| Thermal correction to Gibbs Free Energy=     | 0.339792                    |
| Sum of electronic and zero-point Energies=   | -3512.752157                |
| Sum of electronic and thermal Energies=      | -3512.734254                |
| Sum of electronic and thermal Enthalpies=    | -3512.733389                |
| Sum of electronic and thermal Free Energies= | -3512.797441                |

Number of Imaginary Frequencies = 1

E (Single Point Energy) [IEFPCM(DCM)M06-2X/6-311++G(2d,2p)] = -3515.755215

|   |             |             |             |
|---|-------------|-------------|-------------|
| C | -0.11217600 | -0.09546500 | 1.40909700  |
| H | -0.20143500 | -1.16698400 | 1.53779100  |
| C | 1.13618800  | 0.43840700  | 1.11271300  |
| N | 2.11350000  | -0.32165000 | 0.60589500  |
| C | 3.39271400  | 0.18898500  | 0.10997800  |
| H | 3.84136200  | 0.89303900  | 0.81428200  |
| C | 2.06055000  | -1.79942300 | 0.58966600  |
| H | 1.10215200  | -2.14271700 | 0.20233900  |
| H | 2.19589900  | -2.16941500 | 1.61437700  |
| C | 3.23044200  | -2.17643100 | -0.31246200 |
| H | 2.91411200  | -2.13867000 | -1.36025100 |
| H | 3.60675700  | -3.17837500 | -0.10131000 |
| C | 4.25735100  | -1.08012800 | -0.02129900 |



|   |             |             |             |
|---|-------------|-------------|-------------|
| H | 4.75322700  | -1.26980700 | 0.93490500  |
| H | 5.02253900  | -0.96856100 | -0.79076500 |
| C | 1.31369400  | 1.93657800  | 1.14297900  |
| H | 2.31762400  | 2.20438500  | 1.48390400  |
| H | 1.21264600  | 2.32038300  | 0.11727800  |
| C | -0.64660000 | 0.03665200  | -0.73599000 |
| H | -0.63090700 | 1.13771200  | -0.67856700 |
| C | -2.07317100 | -0.50994000 | -0.79265000 |
| O | 0.25336600  | -0.56417100 | -1.38450100 |
| C | 3.30173900  | 0.93020500  | -1.23487500 |
| O | 2.23266000  | 0.78300900  | -1.97878000 |
| O | 4.24653800  | 1.61517100  | -1.58336000 |
| C | -3.13839800 | 0.54393000  | -0.50815300 |
| H | -4.07341500 | 0.05710000  | -0.21523100 |
| C | -3.38747300 | 1.41362800  | -1.74569900 |
| H | -2.43981200 | 1.83314900  | -2.10645600 |
| H | -3.77595000 | 0.78240400  | -2.55383300 |
| H | -2.18868100 | -0.86857600 | -1.81899100 |
| H | -2.82625700 | 1.18588900  | 0.32143700  |
| C | -4.36841300 | 2.54440100  | -1.44618700 |
| H | -3.97539600 | 3.20327800  | -0.66542800 |
| H | -4.55806400 | 3.15001700  | -2.33611400 |
| H | -5.32653000 | 2.14525600  | -1.09796700 |
| H | 1.44471200  | 0.17635700  | -1.63674300 |
| C | 0.28276700  | 2.60416400  | 2.05661500  |
| C | -1.09091700 | 0.73498600  | 2.20170900  |
| H | 0.55835000  | 2.44532800  | 3.10936200  |
| H | 0.24906000  | 3.67764400  | 1.86585100  |

|    |             |             |            |
|----|-------------|-------------|------------|
| H  | -2.11554500 | 0.39690600  | 2.03389600 |
| H  | -0.89340000 | 0.63954400  | 3.28205300 |
| O  | -1.02314500 | 2.10143600  | 1.83341700 |
| Br | -2.33236200 | -2.16687400 | 0.22160100 |

(S)-TS1<sub>P</sub>-Br-P

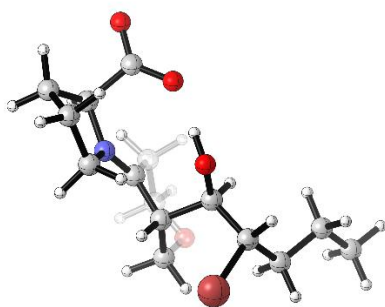

-----  
 - Thermochemistry -  
 -----

|                                              |                             |
|----------------------------------------------|-----------------------------|
| Zero-point correction=                       | 0.389442 (Hartree/Particle) |
| Thermal correction to Energy=                | 0.407418                    |
| Thermal correction to Enthalpy=              | 0.408283                    |
| Thermal correction to Gibbs Free Energy=     | 0.343838                    |
| Sum of electronic and zero-point Energies=   | -3512.783672                |
| Sum of electronic and thermal Energies=      | -3512.765695                |
| Sum of electronic and thermal Enthalpies=    | -3512.764830                |
| Sum of electronic and thermal Free Energies= | -3512.829276                |
| Number of Imaginary Frequencies =            | 0                           |

E (Single Point Energy) [IEFPCM(DCM)M06-2X/6-311++G(2d,2p)] = -3515.791108

|   |             |             |            |
|---|-------------|-------------|------------|
| C | -0.17280200 | -0.19360500 | 0.89572100 |
| H | -0.13154100 | -1.26955800 | 1.06757700 |
| C | 1.20400600  | 0.40000500  | 0.87499900 |
| N | 2.23815800  | -0.32001100 | 0.60497700 |

|   |             |             |             |
|---|-------------|-------------|-------------|
| C | 3.55268700  | 0.24658000  | 0.23346200  |
| H | 3.87653800  | 0.98085600  | 0.97121200  |
| C | 2.23111800  | -1.80207800 | 0.40282900  |
| H | 1.34545300  | -2.09454100 | -0.15662200 |
| H | 2.22387100  | -2.26170400 | 1.39578700  |
| C | 3.53744700  | -2.07041800 | -0.33894500 |
| H | 3.38244600  | -1.95769900 | -1.41636800 |
| H | 3.90306000  | -3.07945800 | -0.14510100 |
| C | 4.46931500  | -0.97564700 | 0.18248700  |
| H | 4.82762500  | -1.22044400 | 1.18727900  |
| H | 5.32820800  | -0.78417700 | -0.46081100 |
| C | 1.28157300  | 1.88842700  | 1.04497000  |
| H | 2.28963700  | 2.22290500  | 1.29101000  |
| H | 1.02459000  | 2.33008900  | 0.07374300  |
| C | -0.74372700 | 0.04996700  | -0.54058500 |
| H | -0.76598900 | 1.13536300  | -0.71752700 |
| C | -2.18565100 | -0.42248500 | -0.75724300 |
| O | 0.07168900  | -0.58372300 | -1.49575900 |
| C | 3.43817700  | 0.95789700  | -1.16483400 |
| O | 2.31823100  | 0.93421100  | -1.74217200 |
| O | 4.49667800  | 1.47617200  | -1.54902200 |
| C | -3.26513500 | 0.60404900  | -0.42238900 |
| H | -4.22472000 | 0.09015300  | -0.31006300 |
| C | -3.39641100 | 1.65797300  | -1.52778400 |
| H | -2.42813700 | 2.13616300  | -1.71716700 |
| H | -3.68811300 | 1.16207600  | -2.46106500 |
| H | -2.26049700 | -0.69465900 | -1.81094000 |
| H | -3.05038500 | 1.10147300  | 0.52887300  |

|    |             |             |             |
|----|-------------|-------------|-------------|
| C  | -4.42606400 | 2.72426300  | -1.15986400 |
| H  | -4.12878000 | 3.25424600  | -0.24938800 |
| H  | -4.53407100 | 3.46120000  | -1.95981100 |
| H  | -5.40723800 | 2.27286100  | -0.98106300 |
| H  | 0.89329300  | -0.05373300 | -1.63682900 |
| C  | 0.29353900  | 2.38064200  | 2.11420700  |
| C  | -0.99063700 | 0.44530400  | 2.02470600  |
| H  | 0.64982000  | 2.10272900  | 3.11606000  |
| H  | 0.21211800  | 3.46641100  | 2.06156600  |
| H  | -2.02171400 | 0.09322900  | 1.99728600  |
| H  | -0.56219400 | 0.15151900  | 2.99401300  |
| O  | -1.00314000 | 1.85288800  | 1.90872600  |
| Br | -2.52721900 | -2.14533800 | 0.14168300  |

(R)-TS1<sub>G</sub>-Br-Pre

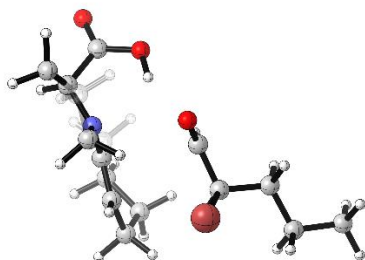

-----  
- Thermochemistry -  
-----

|                                              |                             |
|----------------------------------------------|-----------------------------|
| Zero-point correction=                       | 0.408700 (Hartree/Particle) |
| Thermal correction to Energy=                | 0.428388                    |
| Thermal correction to Enthalpy=              | 0.429253                    |
| Thermal correction to Gibbs Free Energy=     | 0.360463                    |
| Sum of electronic and zero-point Energies=   | -3476.856317                |
| Sum of electronic and thermal Energies=      | -3476.836629                |
| Sum of electronic and thermal Enthalpies=    | -3476.835764                |
| Sum of electronic and thermal Free Energies= | -3476.904554                |
| Number of Imaginary Frequencies = 0          |                             |

E (Single Point Energy) [IEFPCM(DCM)M06-2X/6-311++G(2d,2p)] = -3479.870718

|   |             |             |             |
|---|-------------|-------------|-------------|
| C | -0.37093700 | 1.05413800  | -1.61610700 |
| H | -0.13909400 | 0.19171400  | -2.23287200 |
| C | -1.40742000 | 0.99533400  | -0.74977800 |
| N | -2.11186800 | -0.18820000 | -0.52519600 |
| C | -3.45987100 | -0.20908400 | 0.03087000  |
| H | -4.08438800 | 0.62163200  | -0.31088100 |
| C | -1.84513600 | -1.37438500 | -1.33956700 |
| H | -0.79626000 | -1.66897600 | -1.23974000 |
| H | -2.05255800 | -1.17324700 | -2.40317200 |
| C | -2.81206100 | -2.40391700 | -0.76753200 |
| H | -2.39412900 | -2.83935200 | 0.14688900  |
| H | -3.02437500 | -3.21490100 | -1.46637600 |
| C | -4.04839700 | -1.55687600 | -0.45389000 |
| H | -4.61988200 | -1.37529300 | -1.36820400 |
| H | -4.72018100 | -2.00325800 | 0.28228600  |
| C | -1.80379200 | 2.18256200  | 0.10396500  |
| H | -2.89032200 | 2.31540100  | 0.08118900  |
| H | -1.54877300 | 1.97236600  | 1.15405900  |
| C | 0.35095700  | 3.25656000  | -0.64236600 |
| C | 0.72014000  | -0.24423100 | 1.00879800  |
| H | 0.36365000  | 0.64200200  | 1.56935000  |
| C | 2.05272800  | -0.03306900 | 0.33897200  |
| O | 0.10216700  | -1.28565400 | 1.04111700  |
| C | -3.46328600 | -0.14917000 | 1.55963900  |
| O | -2.36898400 | -0.58358500 | 2.18333700  |
| O | -4.42810100 | 0.23097100  | 2.18645100  |
| C | 3.16331300  | -0.11771400 | 1.38867700  |

|    |             |             |             |
|----|-------------|-------------|-------------|
| H  | 2.88135600  | 0.54733400  | 2.21733600  |
| C  | 4.53539000  | 0.29681400  | 0.86249700  |
| H  | 4.83533800  | -0.38620300 | 0.06094900  |
| H  | 4.46095200  | 1.29703300  | 0.41812500  |
| H  | 2.05342900  | 0.94606700  | -0.14343400 |
| H  | 3.19332400  | -1.13867600 | 1.78707000  |
| C  | 5.58310400  | 0.29399600  | 1.97290700  |
| H  | 5.67184100  | -0.70071700 | 2.42124600  |
| H  | 6.56563800  | 0.57831500  | 1.58782700  |
| H  | 5.31453500  | 0.99778000  | 2.76708200  |
| H  | -1.66343800 | -0.83949000 | 1.54832900  |
| C  | -1.13061200 | 3.48032800  | -0.34931200 |
| C  | 0.50134000  | 2.26979300  | -1.79957300 |
| H  | -1.62197200 | 3.84241600  | -1.26122900 |
| H  | -1.26960200 | 4.24737400  | 0.41807900  |
| H  | 1.54805600  | 1.95294300  | -1.91003300 |
| H  | 0.25159600  | 2.77547000  | -2.74335500 |
| H  | 0.83724900  | 2.85572100  | 0.25940400  |
| H  | 0.84805700  | 4.20228300  | -0.87848600 |
| Br | 2.31284600  | -1.33339000 | -1.07604300 |

(*R*)-TS1<sub>G</sub>-Br

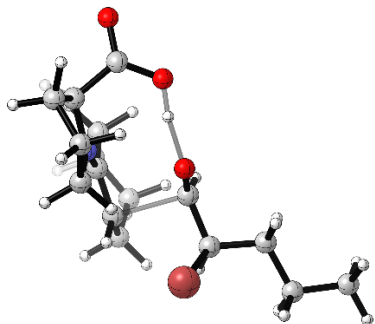

-----  
- Thermochemistry -  
-----

|                                              |                             |
|----------------------------------------------|-----------------------------|
| Zero-point correction=                       | 0.408659 (Hartree/Particle) |
| Thermal correction to Energy=                | 0.426827                    |
| Thermal correction to Enthalpy=              | 0.427692                    |
| Thermal correction to Gibbs Free Energy=     | 0.363361                    |
| Sum of electronic and zero-point Energies=   | -3476.848987                |
| Sum of electronic and thermal Energies=      | -3476.830819                |
| Sum of electronic and thermal Enthalpies=    | -3476.829954                |
| Sum of electronic and thermal Free Energies= | -3476.894285                |

Number of Imaginary Frequencies = 1

E (Single Point Energy) [IEFPCM(DCM)M06-2X/6-311++G(2d,2p)] = -3479.861538

|   |             |             |             |
|---|-------------|-------------|-------------|
| C | -0.26856900 | 1.17811400  | -1.23258300 |
| H | 0.13560100  | 0.41556100  | -1.89157800 |
| C | -1.51904800 | 0.95688300  | -0.67546800 |
| N | -2.05600700 | -0.27818600 | -0.62625100 |
| C | -3.30732300 | -0.61014300 | 0.05652400  |
| H | -4.11601200 | 0.06537500  | -0.23148600 |
| C | -1.51677800 | -1.42798700 | -1.37617100 |
| H | -0.43695200 | -1.49182100 | -1.25942000 |
| H | -1.76381400 | -1.31217400 | -2.44061600 |
| C | -2.23528600 | -2.61593500 | -0.74835500 |
| H | -1.71212600 | -2.91453500 | 0.16655600  |
| H | -2.27999800 | -3.47572100 | -1.41870500 |
| C | -3.61513500 | -2.04555800 | -0.41847200 |
| H | -4.22833400 | -1.99274300 | -1.32253500 |
| H | -4.16482600 | -2.61157500 | 0.33532600  |
| C | -2.23344100 | 2.06042000  | 0.07306300  |
| H | -3.31522700 | 1.93738100  | -0.01933200 |
| H | -2.00162500 | 1.95246100  | 1.14412000  |
| C | -0.31390600 | 3.59594700  | -0.46504200 |

|    |             |             |             |
|----|-------------|-------------|-------------|
| C  | 0.70105400  | 0.33102400  | 0.61196500  |
| H  | 0.50458100  | 1.27663900  | 1.14340000  |
| C  | 2.12229400  | 0.25397800  | 0.08673900  |
| O  | 0.10721600  | -0.71708100 | 0.95907400  |
| C  | -3.23513700 | -0.54595800 | 1.59021000  |
| O  | -2.06366900 | -0.59173100 | 2.18301900  |
| O  | -4.27325100 | -0.48627000 | 2.22361600  |
| C  | 3.06943300  | 0.06180600  | 1.27130400  |
| H  | 2.82693400  | 0.84513600  | 2.00386600  |
| C  | 4.54879700  | 0.16819900  | 0.90918700  |
| H  | 4.82302000  | -0.66259300 | 0.25055300  |
| H  | 4.71415600  | 1.09152500  | 0.34006900  |
| H  | 2.39069700  | 1.14177700  | -0.48429000 |
| H  | 2.85105500  | -0.90179200 | 1.74515700  |
| C  | 5.43162200  | 0.15959400  | 2.15511600  |
| H  | 5.27709000  | -0.75622500 | 2.73480200  |
| H  | 6.49062600  | 0.21451400  | 1.88978600  |
| H  | 5.20147100  | 1.01007000  | 2.80481600  |
| H  | -1.21559700 | -0.63356600 | 1.58930100  |
| C  | -1.83115600 | 3.45667800  | -0.40464200 |
| C  | 0.26111200  | 2.57933300  | -1.45034700 |
| H  | -2.25098600 | 3.63185200  | -1.40304000 |
| H  | -2.26901200 | 4.20227900  | 0.26494400  |
| H  | 1.35605800  | 2.58304200  | -1.40024700 |
| H  | 0.01956000  | 2.89470300  | -2.47510300 |
| H  | 0.10662700  | 3.43636800  | 0.53648500  |
| H  | -0.03195000 | 4.60863600  | -0.76841200 |
| Br | 2.31335600  | -1.24528500 | -1.15070000 |



(R)-TS1G-Br-P

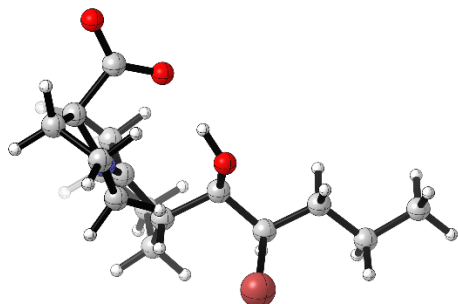

-----  
- Thermochemistry -  
-----

|                                              |                             |
|----------------------------------------------|-----------------------------|
| Zero-point correction=                       | 0.413168 (Hartree/Particle) |
| Thermal correction to Energy=                | 0.431291                    |
| Thermal correction to Enthalpy=              | 0.432156                    |
| Thermal correction to Gibbs Free Energy=     | 0.367485                    |
| Sum of electronic and zero-point Energies=   | -3476.879029                |
| Sum of electronic and thermal Energies=      | -3476.860906                |
| Sum of electronic and thermal Enthalpies=    | -3476.860041                |
| Sum of electronic and thermal Free Energies= | -3476.924713                |

Number of Imaginary Frequencies = 0

E (Single Point Energy) [IEFPCM<sub>(DCM)</sub>M06-2X/6-311++G(2d,2p)] = -3479.895319

|   |             |             |             |
|---|-------------|-------------|-------------|
| C | -0.06913900 | 0.95080700  | -0.79336200 |
| H | 0.07693500  | 0.25904300  | -1.62310100 |
| C | -1.50663200 | 0.92681200  | -0.36279600 |
| N | -2.23800800 | -0.10623000 | -0.61635400 |
| C | -3.54720100 | -0.36679900 | 0.02170300  |
| H | -4.19628100 | 0.50408300  | -0.07211800 |
| C | -1.80524400 | -1.29192600 | -1.42106400 |
| H | -0.78020800 | -1.55575200 | -1.17011000 |
| H | -1.87982700 | -1.01035200 | -2.47609600 |
| C | -2.81644800 | -2.37139100 | -1.04717900 |
| H | -2.47713100 | -2.90310000 | -0.15269800 |
| H | -2.94095400 | -3.09526400 | -1.85344500 |

|   |             |             |             |
|---|-------------|-------------|-------------|
| C | -4.08579000 | -1.57617300 | -0.74227200 |
| H | -4.56884000 | -1.25156400 | -1.66926400 |
| H | -4.81249300 | -2.11823500 | -0.13706800 |
| C | -1.99176100 | 2.05911900  | 0.49405900  |
| H | -3.07449000 | 2.03880300  | 0.61311900  |
| H | -1.56811800 | 1.87959700  | 1.49252800  |
| C | -0.01609700 | 3.45317900  | -0.26537500 |
| C | 0.73202700  | 0.38864600  | 0.42988300  |
| H | 0.65471800  | 1.11198900  | 1.25821800  |
| C | 2.22702100  | 0.27564200  | 0.15180700  |
| O | 0.25653800  | -0.86724200 | 0.83368800  |
| C | -3.34448700 | -0.67236900 | 1.54881000  |
| O | -2.16831800 | -0.64333400 | 2.00151000  |
| O | -4.39897100 | -0.90977200 | 2.15688200  |
| C | 2.99053400  | -0.31959300 | 1.32374700  |
| H | 2.66359600  | 0.22935700  | 2.21915500  |
| C | 4.50799100  | -0.20863600 | 1.19820200  |
| H | 4.84740800  | -0.80498500 | 0.34416600  |
| H | 4.77995200  | 0.83268400  | 0.98386100  |
| H | 2.63943900  | 1.24873600  | -0.11858000 |
| H | 2.68510300  | -1.36080700 | 1.46323600  |
| C | 5.21222600  | -0.67725100 | 2.46961500  |
| H | 4.95704600  | -1.71817000 | 2.69333100  |
| H | 6.29879300  | -0.61175500 | 2.36877300  |
| H | 4.91545500  | -0.06829400 | 3.32964800  |
| H | -0.61766900 | -0.78215000 | 1.28962300  |
| C | -1.52442000 | 3.42625400  | -0.03008400 |
| C | 0.37185100  | 2.35186400  | -1.25019000 |

|    |             |             |             |
|----|-------------|-------------|-------------|
| H  | -2.04449400 | 3.65270800  | -0.96863100 |
| H  | -1.82282400 | 4.18856200  | 0.69400600  |
| H  | 1.44768900  | 2.34485400  | -1.44652400 |
| H  | -0.10877800 | 2.55501000  | -2.21461600 |
| H  | 0.51252500  | 3.32910000  | 0.68799100  |
| H  | 0.28216100  | 4.42590500  | -0.66672300 |
| Br | 2.52219300  | -0.83722100 | -1.45268200 |

(S)-TS1<sub>G</sub>-Br-Pre

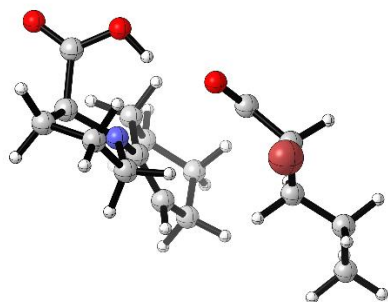

-----  
 - Thermochemistry -  
 -----

|                                              |                             |
|----------------------------------------------|-----------------------------|
| Zero-point correction=                       | 0.408539 (Hartree/Particle) |
| Thermal correction to Energy=                | 0.428230                    |
| Thermal correction to Enthalpy=              | 0.429095                    |
| Thermal correction to Gibbs Free Energy=     | 0.359689                    |
| Sum of electronic and zero-point Energies=   | -3476.854839                |
| Sum of electronic and thermal Energies=      | -3476.835147                |
| Sum of electronic and thermal Enthalpies=    | -3476.834282                |
| Sum of electronic and thermal Free Energies= | -3476.903689                |

Number of Imaginary Frequencies = 0

E (Single Point Energy) [IEFPCM<sub>(DCM)</sub>M06-2X/6-311++G(2d,2p)] = -3479.870083

|   |             |             |             |
|---|-------------|-------------|-------------|
| C | -0.20317200 | 1.72486600  | -1.17741000 |
| H | 0.24264800  | 1.11926300  | -1.96135500 |
| C | -1.27279100 | 1.25349200  | -0.50388900 |
| N | -1.75730900 | -0.05030200 | -0.67879400 |

|   |             |             |             |
|---|-------------|-------------|-------------|
| C | -3.19593300 | -0.32148900 | -0.65849600 |
| H | -3.79168500 | 0.51092800  | -1.04818900 |
| C | -1.07162400 | -0.96268400 | -1.59266900 |
| H | -0.05263000 | -1.15012100 | -1.23820300 |
| H | -1.01546900 | -0.54556200 | -2.61129600 |
| C | -1.96255500 | -2.19716900 | -1.56600600 |
| H | -1.77990200 | -2.76819200 | -0.64886900 |
| H | -1.79936000 | -2.85425600 | -2.42209100 |
| C | -3.36135800 | -1.57411800 | -1.55505500 |
| H | -3.63215200 | -1.24914700 | -2.56340700 |
| H | -4.14652500 | -2.24008900 | -1.19155400 |
| C | -1.96037600 | 2.06360300  | 0.57490700  |
| H | -3.04891400 | 1.99308000  | 0.46734500  |
| H | -1.72524600 | 1.61384100  | 1.55158000  |
| C | 0.81371500  | -0.27864000 | 1.45201400  |
| H | 0.62643400  | 0.73050000  | 1.86521600  |
| C | 2.24189500  | -0.49122500 | 1.00888000  |
| O | -0.06173400 | -1.11184100 | 1.41976000  |
| C | -3.72804300 | -0.61109000 | 0.74531500  |
| O | -2.83850500 | -0.95800800 | 1.66960200  |
| O | -4.91329200 | -0.57112800 | 0.99895600  |
| C | 2.76003000  | 0.65709600  | 0.15144900  |
| H | 2.25355600  | 0.63940400  | -0.81955900 |
| C | 4.27492700  | 0.65902200  | -0.03467400 |
| H | 4.75850200  | 0.56935500  | 0.94595100  |
| H | 4.57117200  | -0.21994400 | -0.61678500 |
| H | 2.83565300  | -0.56907300 | 1.92780900  |
| H | 2.45810900  | 1.58944800  | 0.65146200  |

|    |             |             |             |
|----|-------------|-------------|-------------|
| C  | 4.74393200  | 1.93445900  | -0.73076600 |
| H  | 4.48542400  | 2.81939500  | -0.14002800 |
| H  | 5.82695600  | 1.93042500  | -0.87733200 |
| H  | 4.27194200  | 2.03777100  | -1.71354300 |
| H  | -1.92099100 | -0.89974900 | 1.32102800  |
| C  | -1.54261300 | 3.53512900  | 0.56089500  |
| C  | 0.40875600  | 3.08171000  | -0.93174900 |
| H  | -2.03017900 | 4.04317600  | -0.28092800 |
| H  | -1.89220400 | 4.02112300  | 1.47652200  |
| H  | 1.50255100  | 3.01044800  | -0.98041200 |
| H  | 0.12033300  | 3.76839600  | -1.74065800 |
| C  | -0.02911400 | 3.66844100  | 0.40927300  |
| H  | 0.27818600  | 4.71602700  | 0.48544500  |
| H  | 0.46605000  | 3.12794700  | 1.22913300  |
| Br | 2.44151700  | -2.20322500 | 0.11616000  |

(S)-TS1<sub>G</sub>-Br

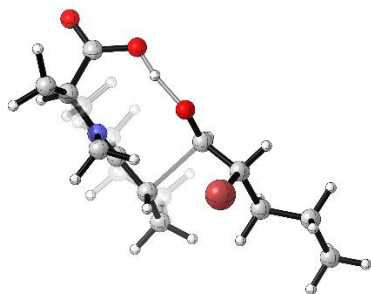

-----  
 - Thermochemistry -  
 -----

|                                            |                             |
|--------------------------------------------|-----------------------------|
| Zero-point correction=                     | 0.408901 (Hartree/Particle) |
| Thermal correction to Energy=              | 0.426949                    |
| Thermal correction to Enthalpy=            | 0.427814                    |
| Thermal correction to Gibbs Free Energy=   | 0.363834                    |
| Sum of electronic and zero-point Energies= | -3476.842825                |
| Sum of electronic and thermal Energies=    | -3476.824777                |

Sum of electronic and thermal Enthalpies= -3476.823912  
Sum of electronic and thermal Free Energies= -3476.887892

Number of Imaginary Frequencies = 1

E (Single Point Energy) [IEFPCM<sub>(DCM)</sub>M06-2X/6-311++G(2d,2p)] = -3479.855148

|   |             |             |             |
|---|-------------|-------------|-------------|
| C | 0.12950200  | 0.96109300  | -1.06832100 |
| H | 0.48893500  | 0.09613700  | -1.61979600 |
| C | -1.22164800 | 0.99513400  | -0.72896600 |
| N | -1.97328500 | -0.11796400 | -0.72126600 |
| C | -3.36885300 | -0.17827400 | -0.27575200 |
| H | -3.97108000 | 0.60221200  | -0.74593200 |
| C | -1.53198700 | -1.39827500 | -1.30614000 |
| H | -0.52008600 | -1.63591900 | -0.98726500 |
| H | -1.56278900 | -1.32097400 | -2.40159600 |
| C | -2.55550000 | -2.39342900 | -0.77466900 |
| H | -2.26887400 | -2.70591500 | 0.23523500  |
| H | -2.63470300 | -3.28153000 | -1.40358700 |
| C | -3.84348200 | -1.57060600 | -0.74056200 |
| H | -4.26167200 | -1.48254200 | -1.74728900 |
| H | -4.61534400 | -1.97301700 | -0.08275800 |
| C | -1.83207600 | 2.25021400  | -0.14296000 |
| H | -2.90022500 | 2.29501000  | -0.36635300 |
| H | -1.74960200 | 2.17610200  | 0.95270700  |
| C | 0.62614100  | 0.10614800  | 0.95182500  |
| H | 0.60644500  | 1.12448600  | 1.37129800  |
| C | 2.04403500  | -0.42590500 | 0.77804900  |
| O | -0.27018100 | -0.72001200 | 1.25920300  |
| C | -3.57251200 | -0.00886800 | 1.23848600  |
| O | -2.55213000 | -0.16257800 | 2.04820900  |

|    |             |             |             |
|----|-------------|-------------|-------------|
| O  | -4.69227400 | 0.23695300  | 1.64972100  |
| C  | 3.14026400  | 0.56513500  | 0.42409500  |
| H  | 3.20183600  | 0.68137600  | -0.66201400 |
| C  | 4.50682100  | 0.15341000  | 0.97127200  |
| H  | 4.44854100  | 0.07907600  | 2.06388300  |
| H  | 4.75744300  | -0.84681800 | 0.59813600  |
| H  | 2.26145800  | -0.86977100 | 1.75701600  |
| H  | 2.86318800  | 1.54359300  | 0.84220700  |
| C  | 5.59931000  | 1.14243900  | 0.57382000  |
| H  | 5.37458000  | 2.14596100  | 0.94976600  |
| H  | 6.57052700  | 0.84239500  | 0.97555600  |
| H  | 5.68994500  | 1.20470500  | -0.51540500 |
| H  | -1.61957800 | -0.36407100 | 1.63068200  |
| C  | -1.15273600 | 3.53335100  | -0.62254800 |
| C  | 0.86497200  | 2.26143000  | -1.34521200 |
| H  | -1.41570800 | 3.71159500  | -1.67264800 |
| H  | -1.54105800 | 4.37735500  | -0.04542000 |
| H  | 1.93898100  | 2.13381700  | -1.21126600 |
| H  | 0.72935000  | 2.51760800  | -2.40633800 |
| C  | 0.36237100  | 3.42664100  | -0.49660500 |
| H  | 0.84124100  | 4.35614600  | -0.81934100 |
| H  | 0.63404600  | 3.27777900  | 0.55728700  |
| Br | 2.09760400  | -1.97747900 | -0.41342400 |

(S)-TS1<sub>G</sub>-Br-P

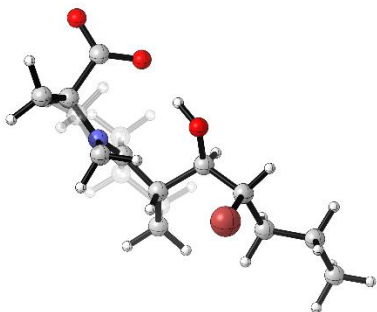

-----  
- Thermochemistry -  
-----

|                                              |                             |
|----------------------------------------------|-----------------------------|
| Zero-point correction=                       | 0.413268 (Hartree/Particle) |
| Thermal correction to Energy=                | 0.431325                    |
| Thermal correction to Enthalpy=              | 0.432190                    |
| Thermal correction to Gibbs Free Energy=     | 0.367929                    |
| Sum of electronic and zero-point Energies=   | -3476.874439                |
| Sum of electronic and thermal Energies=      | -3476.856382                |
| Sum of electronic and thermal Enthalpies=    | -3476.855517                |
| Sum of electronic and thermal Free Energies= | -3476.919777                |

Number of Imaginary Frequencies = 0

E (Single Point Energy) [IEFPCM<sub>(DCM)</sub>M06-2X/6-311++G(2d,2p)] = -3479.890591

|   |             |             |             |
|---|-------------|-------------|-------------|
| C | 0.16802000  | 0.63928600  | -0.72811500 |
| H | 0.30319000  | -0.24269400 | -1.35593600 |
| C | -1.30142800 | 0.89080400  | -0.52872300 |
| N | -2.15079400 | -0.06799200 | -0.68361700 |
| C | -3.56974800 | 0.00782400  | -0.26856200 |
| H | -4.03493300 | 0.90267900  | -0.68305500 |
| C | -1.80585000 | -1.45879700 | -1.11209800 |
| H | -0.88929200 | -1.77804800 | -0.61907600 |
| H | -1.66814600 | -1.44162400 | -2.19773300 |
| C | -3.02869000 | -2.27538300 | -0.70525400 |
| H | -2.92454900 | -2.60513500 | 0.33312600  |
| H | -3.14674600 | -3.15587200 | -1.33794100 |



|   |             |             |             |
|---|-------------|-------------|-------------|
| C | -4.17817200 | -1.27587400 | -0.83293200 |
| H | -4.45054000 | -1.13455200 | -1.88359700 |
| H | -5.07035700 | -1.55413400 | -0.27208300 |
| C | -1.70702800 | 2.24074400  | -0.01336300 |
| H | -2.78842200 | 2.36935700  | -0.02024600 |
| H | -1.40295700 | 2.25634500  | 1.04328900  |
| C | 0.73426600  | 0.29070900  | 0.68997700  |
| H | 0.81407200  | 1.21907200  | 1.27817400  |
| C | 2.14264900  | -0.30846400 | 0.69041400  |
| O | -0.07578300 | -0.64624000 | 1.35585600  |
| C | -3.67293600 | 0.07633600  | 1.29679600  |
| O | -2.59808300 | 0.09598600  | 1.95393900  |
| O | -4.83786700 | 0.11360800  | 1.72130800  |
| C | 3.31698800  | 0.59631700  | 0.33539000  |
| H | 3.45955400  | 0.63763100  | -0.74871300 |
| C | 4.62051400  | 0.14444800  | 0.99451700  |
| H | 4.49146000  | 0.14702300  | 2.08338600  |
| H | 4.83033800  | -0.89126600 | 0.70178100  |
| H | 2.28000400  | -0.70383400 | 1.69917000  |
| H | 3.07813500  | 1.61608100  | 0.66983300  |
| C | 5.79343900  | 1.04062400  | 0.60615400  |
| H | 5.60855000  | 2.07814300  | 0.90327800  |
| H | 6.71852100  | 0.71281100  | 1.08719800  |
| H | 5.95293700  | 1.02508300  | -0.47685100 |
| H | -0.97380000 | -0.29643900 | 1.57992700  |
| C | -1.01013000 | 3.38560500  | -0.76368600 |
| C | 0.82985600  | 1.83763000  | -1.43538700 |
| H | -1.39481600 | 3.43736800  | -1.78932700 |

|    |             |             |             |
|----|-------------|-------------|-------------|
| H  | -1.27415200 | 4.32585600  | -0.27305700 |
| H  | 1.90624300  | 1.67844600  | -1.49439100 |
| H  | 0.46763500  | 1.84670800  | -2.47080200 |
| C  | 0.50185200  | 3.18417400  | -0.79397100 |
| H  | 0.97715800  | 3.98582800  | -1.36655400 |
| H  | 0.90546400  | 3.24142000  | 0.22486800  |
| Br | 2.18209300  | -1.93723000 | -0.41900300 |

(R)-TS1<sub>o</sub>-Br-Pre

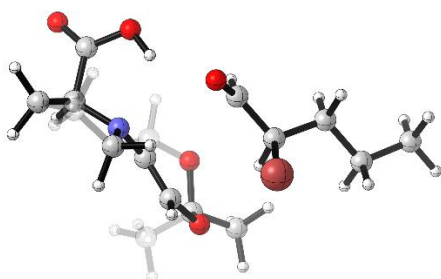

-----  
 - Thermochemistry -  
 -----

|                                              |                             |
|----------------------------------------------|-----------------------------|
| Zero-point correction=                       | 0.416339 (Hartree/Particle) |
| Thermal correction to Energy=                | 0.437978                    |
| Thermal correction to Enthalpy=              | 0.438843                    |
| Thermal correction to Gibbs Free Energy=     | 0.366152                    |
| Sum of electronic and zero-point Energies=   | -3627.237810                |
| Sum of electronic and thermal Energies=      | -3627.216171                |
| Sum of electronic and thermal Enthalpies=    | -3627.215306                |
| Sum of electronic and thermal Free Energies= | -3627.287997                |

Number of Imaginary Frequencies = 0

E (Single Point Energy) [IEFPCM(DCM)M06-2X/6-311++G(2d,2p)] = -3630.305534

|   |             |             |             |
|---|-------------|-------------|-------------|
| C | -0.26603000 | 0.92528900  | -1.36649000 |
| H | -0.18480700 | 0.27856000  | -2.22965100 |
| C | -1.21355000 | 0.81405300  | -0.41975700 |
| N | -2.18955500 | -0.18852300 | -0.42804600 |

|   |             |             |             |
|---|-------------|-------------|-------------|
| C | -3.51209100 | 0.07187200  | 0.14180600  |
| H | -3.77981300 | 1.13377800  | 0.14321100  |
| C | -2.27889800 | -1.07134800 | -1.59287700 |
| H | -1.39325600 | -1.71393100 | -1.63643600 |
| H | -2.33346900 | -0.48377800 | -2.52403200 |
| C | -3.58049700 | -1.82663400 | -1.34982200 |
| H | -3.41862700 | -2.63688300 | -0.63073600 |
| H | -3.99084500 | -2.25646500 | -2.26494200 |
| C | -4.47888800 | -0.73838000 | -0.75279000 |
| H | -4.85130600 | -0.08437600 | -1.54598200 |
| H | -5.33490500 | -1.12007600 | -0.19333300 |
| C | -1.16059300 | 1.73298700  | 0.77601300  |
| H | -1.93423200 | 2.51295900  | 0.73205700  |
| H | -1.31175600 | 1.17340000  | 1.70556200  |
| O | 0.77158800  | 1.82529300  | -1.29684000 |
| O | 0.13001900  | 2.31441300  | 0.87650200  |
| C | 0.59801400  | 2.87291700  | -0.34018100 |
| C | 1.97474700  | 3.42904300  | -0.05138700 |
| H | 2.44184300  | 3.75905300  | -0.98124000 |
| H | 1.89389200  | 4.27717300  | 0.63159300  |
| C | -0.35421100 | 3.92425600  | -0.89922600 |
| H | 0.12850400  | 4.43232000  | -1.73656700 |
| H | -0.58686100 | 4.65834600  | -0.12362100 |
| H | -1.28195900 | 3.47630600  | -1.26225500 |
| C | 0.59719900  | -1.06628800 | 1.10937700  |
| H | 0.38971000  | -0.43238900 | 1.99493400  |
| C | 1.88195600  | -0.69191100 | 0.42248100  |
| O | -0.15686900 | -1.96008800 | 0.79816200  |

|    |             |             |             |
|----|-------------|-------------|-------------|
| C  | -3.61021600 | -0.40795500 | 1.59360300  |
| O  | -2.65537800 | -1.23382200 | 2.01749900  |
| O  | -4.52626700 | -0.08210800 | 2.31580400  |
| H  | 2.59490100  | 2.65650400  | 0.40967600  |
| C  | 3.08111200  | -0.91052900 | 1.34530500  |
| H  | 2.84456100  | -0.42477900 | 2.30224400  |
| C  | 4.38458700  | -0.33342600 | 0.79818100  |
| H  | 4.61742900  | -0.81735600 | -0.15616900 |
| H  | 4.24472700  | 0.73384100  | 0.58666700  |
| H  | 3.19230500  | -1.98338900 | 1.54341600  |
| C  | 5.53975900  | -0.52571500 | 1.77745400  |
| H  | 5.33544200  | -0.02478500 | 2.72913700  |
| H  | 5.70033100  | -1.58850500 | 1.98496100  |
| H  | 6.46987900  | -0.11750000 | 1.37397000  |
| H  | -1.98587800 | -1.38198200 | 1.31285500  |
| H  | 1.80726500  | 0.36827500  | 0.15680600  |
| Br | 2.05527600  | -1.63353000 | -1.26185600 |

(R)-TS1o-Br

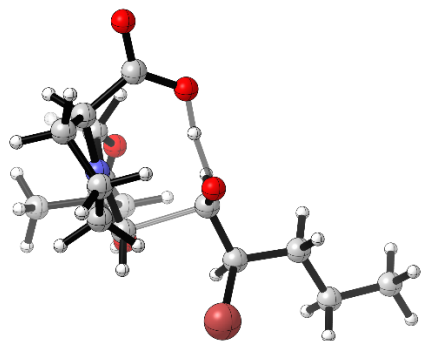

-----  
 - Thermochemistry -  
 -----

Zero-point correction=  
 Thermal correction to Energy=

0.415312 (Hartree/Particle)  
 0.435479

|                                              |              |
|----------------------------------------------|--------------|
| Thermal correction to Enthalpy=              | 0.436344     |
| Thermal correction to Gibbs Free Energy=     | 0.367844     |
| Sum of electronic and zero-point Energies=   | -3627.226893 |
| Sum of electronic and thermal Energies=      | -3627.206726 |
| Sum of electronic and thermal Enthalpies=    | -3627.205861 |
| Sum of electronic and thermal Free Energies= | -3627.274362 |

Number of Imaginary Frequencies = 1

E (Single Point Energy) [IEFPCM(DCM)M06-2X/6-311++G(2d,2p)] = -3630.294358

|   |             |             |             |
|---|-------------|-------------|-------------|
| C | -0.16823300 | 0.95889600  | -0.89261600 |
| H | 0.18662200  | 0.38230700  | -1.73912500 |
| C | -1.43138900 | 0.75184700  | -0.35868300 |
| N | -2.09157100 | -0.39170100 | -0.55219600 |
| C | -3.33929700 | -0.74165100 | 0.12781200  |
| H | -4.03000400 | 0.10634100  | 0.14474000  |
| C | -1.70937500 | -1.38160900 | -1.57963400 |
| H | -0.65078500 | -1.63007200 | -1.49379000 |
| H | -1.90843300 | -0.95643900 | -2.57229400 |
| C | -2.62225800 | -2.56357900 | -1.26659600 |
| H | -2.16443600 | -3.18714700 | -0.49141500 |
| H | -2.80624100 | -3.18388500 | -2.14469500 |
| C | -3.89091100 | -1.89186900 | -0.73388200 |
| H | -4.47288400 | -1.47124500 | -1.55891600 |
| H | -4.53619800 | -2.55262500 | -0.15408300 |
| C | -1.97093200 | 1.76163400  | 0.62314400  |
| H | -2.89261100 | 2.21297800  | 0.22788500  |
| H | -2.20987800 | 1.28282000  | 1.57859800  |
| O | 0.47780000  | 2.17327600  | -0.77292100 |
| O | -0.99614300 | 2.74045500  | 0.91593800  |
| C | -0.29891900 | 3.23415500  | -0.21489300 |
| C | 0.68500400  | 4.25929000  | 0.30196500  |

|    |             |             |             |
|----|-------------|-------------|-------------|
| H  | 1.33116100  | 4.58950800  | -0.51377800 |
| H  | 0.14605300  | 5.11909800  | 0.70485500  |
| C  | -1.23922300 | 3.79904000  | -1.27407900 |
| H  | -0.64616700 | 4.29016500  | -2.04800500 |
| H  | -1.90880600 | 4.53260900  | -0.81799200 |
| H  | -1.83785400 | 3.01913200  | -1.75127100 |
| C  | 0.67677400  | -0.19923200 | 0.65748300  |
| H  | 0.49112800  | 0.60141600  | 1.39555100  |
| C  | 2.10562100  | -0.14482500 | 0.14733200  |
| O  | 0.10246900  | -1.32084800 | 0.78541100  |
| C  | -3.17320900 | -1.18409600 | 1.59608600  |
| O  | -1.97732700 | -1.39826000 | 2.07795800  |
| O  | -4.18374700 | -1.32123200 | 2.26354600  |
| H  | 1.29519800  | 3.81173000  | 1.08956700  |
| C  | 3.05231400  | -0.60152400 | 1.25459400  |
| H  | 2.81254000  | -0.00006800 | 2.14325600  |
| C  | 4.53137500  | -0.42322900 | 0.92018800  |
| H  | 4.79596200  | -1.08033500 | 0.08505300  |
| H  | 4.70199800  | 0.60559700  | 0.57947100  |
| H  | 2.83230100  | -1.64607100 | 1.50276600  |
| C  | 5.41968400  | -0.72788700 | 2.12421700  |
| H  | 5.19819600  | -0.05167500 | 2.95613300  |
| H  | 5.26115400  | -1.75296400 | 2.47462700  |
| H  | 6.47791900  | -0.61860700 | 1.87287500  |
| H  | -1.12331400 | -1.33178200 | 1.44487600  |
| H  | 2.35415000  | 0.85984500  | -0.19676900 |
| Br | 2.30850400  | -1.30365800 | -1.41733800 |

(R)-TS1o-Br-P

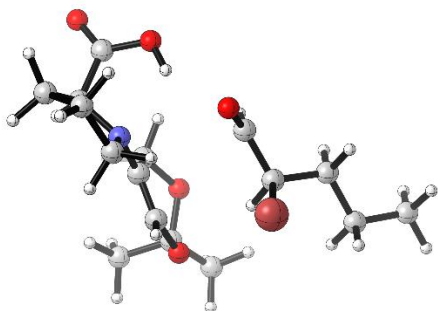

-----  
- Thermochemistry -  
-----

|                                              |                             |
|----------------------------------------------|-----------------------------|
| Zero-point correction=                       | 0.416333 (Hartree/Particle) |
| Thermal correction to Energy=                | 0.437974                    |
| Thermal correction to Enthalpy=              | 0.438840                    |
| Thermal correction to Gibbs Free Energy=     | 0.366131                    |
| Sum of electronic and zero-point Energies=   | -3627.237815                |
| Sum of electronic and thermal Energies=      | -3627.216174                |
| Sum of electronic and thermal Enthalpies=    | -3627.215309                |
| Sum of electronic and thermal Free Energies= | -3627.288017                |

Number of Imaginary Frequencies = 0

E (Single Point Energy) [IEFPCM(DCM)M06-2X/6-311++G(2d,2p)] = -3630.321486

|   |             |             |             |
|---|-------------|-------------|-------------|
| C | -0.26631100 | 0.92433700  | -1.36663700 |
| H | -0.18509600 | 0.27734000  | -2.22960400 |
| C | -1.21395700 | 0.81350400  | -0.41998300 |
| N | -2.19017300 | -0.18886100 | -0.42832300 |
| C | -3.51249300 | 0.07169800  | 0.14191000  |
| H | -3.78030400 | 1.13359200  | 0.14293600  |
| C | -2.27983400 | -1.07157400 | -1.59316500 |
| H | -1.39417500 | -1.71411300 | -1.63704200 |
| H | -2.33470700 | -0.48396200 | -2.52427800 |
| C | -3.58127400 | -1.82699500 | -1.34963900 |
| H | -3.41898500 | -2.63732400 | -0.63074100 |
| H | -3.99199700 | -2.25674700 | -2.26462700 |

|   |             |             |             |
|---|-------------|-------------|-------------|
| C | -4.47956300 | -0.73894700 | -0.75205900 |
| H | -4.85269400 | -0.08509800 | -1.54503900 |
| H | -5.33511700 | -1.12089100 | -0.19206300 |
| C | -1.16101300 | 1.73277600  | 0.77552100  |
| H | -1.93455200 | 2.51282700  | 0.73126300  |
| H | -1.31231500 | 1.17349300  | 1.70522700  |
| O | 0.77143400  | 1.82422000  | -1.29717000 |
| O | 0.12966600  | 2.31407900  | 0.87594600  |
| C | 0.59782600  | 2.87217600  | -0.34086700 |
| C | 1.97453900  | 3.42837000  | -0.05209200 |
| H | 2.44183000  | 3.75787700  | -0.98202400 |
| H | 1.89358700  | 4.27685700  | 0.63043300  |
| C | -0.35427200 | 3.92340200  | -0.90034400 |
| H | 0.12859700  | 4.43122400  | -1.73774300 |
| H | -0.58700200 | 4.65771000  | -0.12496800 |
| H | -1.28198600 | 3.47540200  | -1.26339700 |
| C | 0.59762500  | -1.06463500 | 1.10952500  |
| H | 0.39006000  | -0.42986700 | 1.99443400  |
| C | 1.88243600  | -0.69103000 | 0.42234900  |
| O | -0.15649500 | -1.95864700 | 0.79906900  |
| C | -3.60995400 | -0.40740900 | 1.59400000  |
| O | -2.65470200 | -1.23279700 | 2.01789400  |
| O | -4.52571800 | -0.08132500 | 2.31645600  |
| H | 2.59459800  | 2.65607800  | 0.40951500  |
| C | 3.08153900  | -0.90930100 | 1.34533300  |
| H | 2.84516900  | -0.42266700 | 2.30186900  |
| C | 4.38520700  | -0.33311300 | 0.79770200  |
| H | 4.61790800  | -0.81800700 | -0.15619200 |



|    |             |             |             |
|----|-------------|-------------|-------------|
| H  | 4.24568000  | 0.73399700  | 0.58517900  |
| H  | 3.19235800  | -1.98203500 | 1.54433700  |
| C  | 5.54030300  | -0.52484400 | 1.77717400  |
| H  | 5.33613800  | -0.02294000 | 2.72837600  |
| H  | 5.70052800  | -1.58748800 | 1.98569200  |
| H  | 6.47056100  | -0.11731600 | 1.37331100  |
| H  | -1.98578900 | -1.38142700 | 1.31281500  |
| H  | 1.80800300  | 0.36895600  | 0.15586400  |
| Br | 2.05550400  | -1.63394800 | -1.26129200 |

(S)-TS1o-Br-Pre

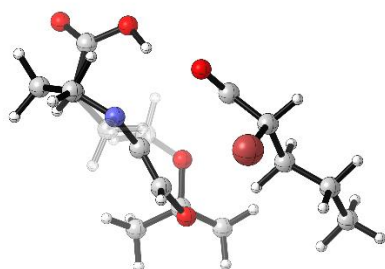

-----  
- Thermochemistry -  
-----

|                                              |                             |
|----------------------------------------------|-----------------------------|
| Zero-point correction=                       | 0.416308 (Hartree/Particle) |
| Thermal correction to Energy=                | 0.437945                    |
| Thermal correction to Enthalpy=              | 0.438810                    |
| Thermal correction to Gibbs Free Energy=     | 0.366172                    |
| Sum of electronic and zero-point Energies=   | -3627.235237                |
| Sum of electronic and thermal Energies=      | -3627.213599                |
| Sum of electronic and thermal Enthalpies=    | -3627.212734                |
| Sum of electronic and thermal Free Energies= | -3627.285373                |

Number of Imaginary Frequencies = 0

E (Single Point Energy) [IEFPCM(DCM)M06-2X/6-311++G(2d,2p)] = -3630.304491

|   |            |            |             |
|---|------------|------------|-------------|
| C | 0.08543300 | 0.85898000 | -1.23927800 |
| H | 0.31327000 | 0.09356000 | -1.97070000 |

|   |             |             |             |
|---|-------------|-------------|-------------|
| C | -1.00915200 | 0.86297300  | -0.45653100 |
| N | -1.98368200 | -0.13869900 | -0.48366800 |
| C | -3.38425100 | 0.19991800  | -0.22654200 |
| H | -3.62817200 | 1.23928400  | -0.47181300 |
| C | -1.87191500 | -1.20007300 | -1.48483500 |
| H | -0.99754400 | -1.82127500 | -1.26734100 |
| H | -1.75993600 | -0.77452000 | -2.49627300 |
| C | -3.20144100 | -1.93206800 | -1.35108000 |
| H | -3.17756300 | -2.60014600 | -0.48322500 |
| H | -3.44501800 | -2.52345100 | -2.23520500 |
| C | -4.18131600 | -0.77634300 | -1.12454600 |
| H | -4.39774800 | -0.27935500 | -2.07417500 |
| H | -5.12841000 | -1.07291900 | -0.67006800 |
| C | -1.15238600 | 1.94276800  | 0.58671800  |
| H | -1.93434700 | 2.67069400  | 0.32567700  |
| H | -1.41841000 | 1.50425900  | 1.55497700  |
| O | 1.06263300  | 1.82370300  | -1.17720200 |
| O | 0.09150800  | 2.59313000  | 0.78539800  |
| C | 0.72754400  | 2.98630700  | -0.41659800 |
| C | 2.03677000  | 3.63032800  | -0.01544100 |
| H | 2.63530100  | 3.83341300  | -0.90595200 |
| H | 2.58812900  | 2.95584200  | 0.64406500  |
| C | -0.14989100 | 3.90738900  | -1.25838000 |
| H | -0.50747900 | 4.73729300  | -0.64334900 |
| H | -1.00689000 | 3.37516700  | -1.67772400 |
| H | 0.44088300  | 4.30642300  | -2.08549500 |
| C | 0.53018200  | -1.04070100 | 1.44078600  |
| H | 0.45023400  | -0.08707300 | 1.99746400  |

|    |             |             |             |
|----|-------------|-------------|-------------|
| C  | 1.93378000  | -1.38085500 | 0.98559600  |
| O  | -0.43201900 | -1.76058800 | 1.29385200  |
| C  | -3.77057500 | -0.00516200 | 1.24135000  |
| O  | -2.94537900 | -0.73404000 | 1.98681300  |
| O  | -4.80028400 | 0.44299300  | 1.69721100  |
| H  | 1.84226200  | 4.56839100  | 0.50879900  |
| C  | 2.82356300  | -0.15855200 | 0.83246000  |
| H  | 2.45156800  | 0.47157000  | 0.01757200  |
| C  | 4.29996500  | -0.48798600 | 0.62886500  |
| H  | 4.62730000  | -1.18369100 | 1.41207000  |
| H  | 4.42869100  | -1.00634300 | -0.32719100 |
| H  | 2.71250700  | 0.42308200  | 1.75998800  |
| C  | 5.16158200  | 0.77213900  | 0.65770000  |
| H  | 5.06631500  | 1.29033200  | 1.61761500  |
| H  | 6.21747200  | 0.53398400  | 0.50573500  |
| H  | 4.85663300  | 1.46824700  | -0.13088900 |
| H  | -2.14383700 | -1.00250800 | 1.48103100  |
| H  | 2.34281400  | -2.05336300 | 1.74980700  |
| Br | 1.86796300  | -2.45977000 | -0.63542200 |

(S)-TS1<sub>O</sub>-Br

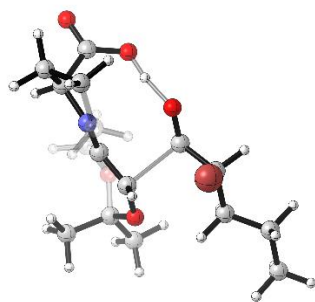

-----  
 - Thermochemistry -  
 -----

|                                              |                             |
|----------------------------------------------|-----------------------------|
| Zero-point correction=                       | 0.415169 (Hartree/Particle) |
| Thermal correction to Energy=                | 0.435309                    |
| Thermal correction to Enthalpy=              | 0.436174                    |
| Thermal correction to Gibbs Free Energy=     | 0.367855                    |
| Sum of electronic and zero-point Energies=   | -3627.223513                |
| Sum of electronic and thermal Energies=      | -3627.203372                |
| Sum of electronic and thermal Enthalpies=    | -3627.202507                |
| Sum of electronic and thermal Free Energies= | -3627.270827                |

Number of Imaginary Frequencies = 1

E (Single Point Energy) [IEFPCM<sub>(DCM)</sub>M06-2X/6-311++G(2d,2p)] = -3630.290158

|   |             |             |             |
|---|-------------|-------------|-------------|
| C | 0.21606100  | 0.68827800  | -0.75369000 |
| H | 0.54808900  | -0.07475000 | -1.45123700 |
| C | -1.13182500 | 0.85673100  | -0.45831600 |
| N | -2.02213000 | -0.11993900 | -0.63298200 |
| C | -3.41876500 | -0.04091300 | -0.19764600 |
| H | -3.85077300 | 0.93417500  | -0.44126100 |
| C | -1.75192100 | -1.32547700 | -1.44049100 |
| H | -0.82124800 | -1.79508800 | -1.12287400 |
| H | -1.67397900 | -1.03249200 | -2.49615900 |
| C | -2.97816400 | -2.19300900 | -1.17573600 |
| H | -2.83395100 | -2.76268000 | -0.25158300 |
| H | -3.16760900 | -2.89485300 | -1.98888400 |
| C | -4.09828000 | -1.16402600 | -1.00230100 |
| H | -4.40516700 | -0.76981700 | -1.97516600 |
| H | -4.98055400 | -1.54608300 | -0.48782300 |
| C | -1.56124400 | 2.10861000  | 0.26704900  |
| H | -2.28817600 | 2.66365500  | -0.34393600 |
| H | -2.04160700 | 1.85499200  | 1.21797700  |
| O | 1.09039300  | 1.75807400  | -0.68510200 |
| O | -0.44671900 | 2.90739900  | 0.59853400  |

|   |             |             |             |
|---|-------------|-------------|-------------|
| C | 0.50386400  | 3.03442000  | -0.44433800 |
| C | 1.61104000  | 3.91651700  | 0.08815800  |
| H | 2.43363300  | 3.94527500  | -0.62919000 |
| H | 1.97192700  | 3.51070300  | 1.03587700  |
| C | -0.11602900 | 3.57537800  | -1.72925200 |
| H | -0.67108900 | 4.49181900  | -1.51289500 |
| H | -0.79002800 | 2.85386000  | -2.19772200 |
| H | 0.68121200  | 3.80153600  | -2.44001600 |
| C | 0.51539100  | -0.41544400 | 1.04136000  |
| H | 0.56023300  | 0.52769500  | 1.61221400  |
| C | 1.90382200  | -1.00058400 | 0.79733500  |
| O | -0.42997800 | -1.23527800 | 1.23699300  |
| C | -3.63968200 | -0.23450600 | 1.31637600  |
| O | -2.64210500 | -0.60565400 | 2.07454700  |
| O | -4.75751700 | -0.02904500 | 1.75587700  |
| H | 1.23549700  | 4.92957100  | 0.24628800  |
| C | 3.04699600  | -0.03329100 | 0.54391900  |
| H | 3.01715600  | 0.33049600  | -0.48711900 |
| C | 4.41795100  | -0.62946100 | 0.85754500  |
| H | 4.42469200  | -0.99864700 | 1.89063500  |
| H | 4.59692700  | -1.49625400 | 0.21086800  |
| H | 2.87802600  | 0.84359500  | 1.18398700  |
| C | 5.53164700  | 0.39770100  | 0.66758000  |
| H | 5.38310900  | 1.26082500  | 1.32476000  |
| H | 6.51142500  | -0.03215100 | 0.89177600  |
| H | 5.55218000  | 0.76249400  | -0.36454000 |
| H | -1.70031600 | -0.82687100 | 1.63534800  |
| H | 2.10386100  | -1.57301700 | 1.71086800  |

Br 1.84753400 -2.39079800 -0.58432700

(S)-TS1<sub>0</sub>-Br-P

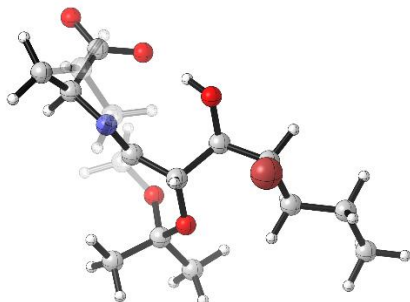

-----  
- Thermochemistry -  
-----

|                                              |                             |
|----------------------------------------------|-----------------------------|
| Zero-point correction=                       | 0.419788 (Hartree/Particle) |
| Thermal correction to Energy=                | 0.439918                    |
| Thermal correction to Enthalpy=              | 0.440783                    |
| Thermal correction to Gibbs Free Energy=     | 0.372541                    |
| Sum of electronic and zero-point Energies=   | -3627.248201                |
| Sum of electronic and thermal Energies=      | -3627.228071                |
| Sum of electronic and thermal Enthalpies=    | -3627.227206                |
| Sum of electronic and thermal Free Energies= | -3627.295449                |

Number of Imaginary Frequencies = 0

E (Single Point Energy) [IEFPCM<sub>(DCM)</sub>M06-2X/6-311++G(2d,2p)] = -3630.318696

|   |             |             |             |
|---|-------------|-------------|-------------|
| C | 0.11814200  | 0.31288600  | -0.53694700 |
| H | 0.18102700  | -0.41755500 | -1.34710900 |
| C | -1.30566500 | 0.72350000  | -0.30339800 |
| N | -2.28075000 | -0.06599300 | -0.57466700 |
| C | -3.64807500 | 0.14091300  | -0.06064800 |
| H | -3.94153200 | 1.18623000  | -0.18326300 |
| C | -2.17858200 | -1.36968400 | -1.30325200 |
| H | -1.34003100 | -1.94393500 | -0.91312300 |
| H | -2.02050400 | -1.12939500 | -2.35909500 |
| C | -3.53979400 | -2.01879100 | -1.05999800 |

|   |             |             |             |
|---|-------------|-------------|-------------|
| H | -3.51091200 | -2.60951400 | -0.13938400 |
| H | -3.81581800 | -2.67709500 | -1.88420300 |
| C | -4.48504200 | -0.82578100 | -0.89500900 |
| H | -4.72211100 | -0.38135000 | -1.86642000 |
| H | -5.41302900 | -1.07041700 | -0.37902300 |
| C | -1.52432800 | 2.03710800  | 0.39565800  |
| H | -2.25575500 | 2.64277700  | -0.15741300 |
| H | -1.91628300 | 1.84585300  | 1.40009200  |
| O | 0.98125200  | 1.38020300  | -0.86003300 |
| O | -0.29535800 | 2.70898100  | 0.54693100  |
| C | 0.51362600  | 2.70926200  | -0.61740100 |
| C | 1.73234100  | 3.54445300  | -0.29230700 |
| H | 2.46040300  | 3.45719500  | -1.10135700 |
| H | 2.18060200  | 3.18562500  | 0.63660200  |
| C | -0.23241200 | 3.21445400  | -1.84898400 |
| H | -0.69273900 | 4.18372900  | -1.64073900 |
| H | -1.00594100 | 2.51714300  | -2.18390200 |
| H | 0.48262900  | 3.32668800  | -2.66605500 |
| C | 0.57900800  | -0.36942600 | 0.79630300  |
| H | 0.58622900  | 0.40893200  | 1.57576100  |
| C | 2.00692400  | -0.91225000 | 0.72587700  |
| O | -0.27000200 | -1.42994100 | 1.13440600  |
| C | -3.69481100 | -0.20302600 | 1.47975600  |
| O | -2.59909600 | -0.44351600 | 2.05348100  |
| O | -4.83417900 | -0.17476900 | 1.96064300  |
| H | 1.44552100  | 4.59178700  | -0.17717300 |
| C | 3.13532400  | 0.10747200  | 0.70947200  |
| H | 3.17846300  | 0.61667200  | -0.25674400 |

|    |             |             |             |
|----|-------------|-------------|-------------|
| C  | 4.49538400  | -0.49124600 | 1.06247600  |
| H  | 4.41868900  | -1.03177100 | 2.01409200  |
| H  | 4.77744600  | -1.22809600 | 0.30198900  |
| H  | 2.87854800  | 0.87195600  | 1.45695600  |
| C  | 5.57153100  | 0.58738600  | 1.16381400  |
| H  | 5.32238600  | 1.31666100  | 1.94161300  |
| H  | 6.54581900  | 0.15527200  | 1.40672000  |
| H  | 5.67009300  | 1.12838800  | 0.21687100  |
| H  | -1.11628500 | -1.08650800 | 1.51510600  |
| H  | 2.11206300  | -1.56963400 | 1.59208400  |
| Br | 2.18154000  | -2.15082100 | -0.79874600 |

(*R*)-TS1<sub>T</sub>-Br-Pre

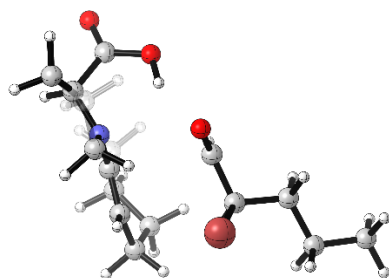

-----  
 - Thermochemistry -  
 -----

|                                            |                             |
|--------------------------------------------|-----------------------------|
| Zero-point correction=                     | 0.381352 (Hartree/Particle) |
| Thermal correction to Energy=              | 0.401336                    |
| Thermal correction to Enthalpy=            | 0.402201                    |
| Thermal correction to Gibbs Free Energy=   | 0.332629                    |
| Sum of electronic and zero-point Energies= | -3835.742971                |



|                                              |              |
|----------------------------------------------|--------------|
| Sum of electronic and thermal Energies=      | -3835.722988 |
| Sum of electronic and thermal Enthalpies=    | -3835.722123 |
| Sum of electronic and thermal Free Energies= | -3835.791695 |

Number of Imaginary Frequencies = 0

E (Single Point Energy) [IEFPCM<sub>(DCM)</sub>M06-2X/6-311++G(2d,2p)] = -3838.753211

|   |             |             |             |
|---|-------------|-------------|-------------|
| C | -0.39407900 | 0.97374400  | -1.58880000 |
| H | -0.20526600 | 0.12554800  | -2.23879700 |
| C | -1.42515800 | 0.91616700  | -0.71585300 |
| N | -2.15492000 | -0.25780600 | -0.54134500 |
| C | -3.49913800 | -0.28228000 | 0.02504600  |
| H | -4.11558700 | 0.56696100  | -0.28431900 |
| C | -1.90105200 | -1.42740700 | -1.38454200 |
| H | -0.85586600 | -1.73631300 | -1.29024300 |
| H | -2.10589100 | -1.19819200 | -2.44262000 |
| C | -2.88097200 | -2.45893300 | -0.83918500 |
| H | -2.46885100 | -2.92340600 | 0.06345800  |
| H | -3.10287500 | -3.24822400 | -1.55939000 |
| C | -4.10603200 | -1.60472800 | -0.50363900 |
| H | -4.67132200 | -1.38582200 | -1.41362200 |
| H | -4.78673100 | -2.06320800 | 0.21660000  |
| C | -1.80864200 | 2.05657200  | 0.20436900  |
| H | -2.89216400 | 2.21429300  | 0.15728900  |
| H | -1.58256200 | 1.77671400  | 1.24251100  |
| C | 0.68820200  | -0.41027700 | 1.02309600  |
| H | 0.35998400  | 0.46483200  | 1.61657400  |
| C | 2.02717900  | -0.21296200 | 0.36394300  |
| O | 0.03564000  | -1.43161000 | 1.00488800  |
| C | -3.49801200 | -0.27684800 | 1.55540500  |

|    |             |             |             |
|----|-------------|-------------|-------------|
| O  | -2.41163300 | -0.74808800 | 2.16505300  |
| O  | -4.45743400 | 0.09689200  | 2.19393500  |
| C  | 3.13474800  | -0.39017300 | 1.40482700  |
| H  | 2.87195200  | 0.23445200  | 2.27038100  |
| C  | 4.51705000  | 0.01688500  | 0.89997300  |
| H  | 4.79401200  | -0.62098100 | 0.05399600  |
| H  | 4.47034400  | 1.04600700  | 0.52284200  |
| H  | 2.05678800  | 0.79277700  | -0.05825900 |
| H  | 3.13648800  | -1.43288000 | 1.74356900  |
| C  | 5.56767800  | -0.08908700 | 2.00252400  |
| H  | 5.32278000  | 0.56942400  | 2.84189200  |
| H  | 5.62797700  | -1.11301200 | 2.38510800  |
| H  | 6.55709300  | 0.19041500  | 1.63175200  |
| H  | -1.70331200 | -0.99694800 | 1.52974400  |
| C  | -1.14095400 | 3.38504600  | -0.12846400 |
| C  | 0.56018900  | 2.12116600  | -1.77486000 |
| H  | -1.55024000 | 3.80371700  | -1.05307600 |
| H  | -1.31261700 | 4.10497000  | 0.67354100  |
| H  | 1.57216500  | 1.73506600  | -1.94398800 |
| H  | 0.30530800  | 2.72315500  | -2.65511100 |
| S  | 0.65691900  | 3.22205400  | -0.32883400 |
| Br | 2.24210000  | -1.44618400 | -1.11808900 |

(*R*)-TS1<sub>T</sub>-Br

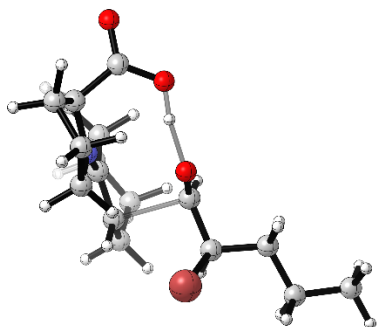

-----  
 - Thermochemistry -  
 -----

|                                              |                             |
|----------------------------------------------|-----------------------------|
| Zero-point correction=                       | 0.381254 (Hartree/Particle) |
| Thermal correction to Energy=                | 0.399604                    |
| Thermal correction to Enthalpy=              | 0.400469                    |
| Thermal correction to Gibbs Free Energy=     | 0.335333                    |
| Sum of electronic and zero-point Energies=   | -3835.733688                |
| Sum of electronic and thermal Energies=      | -3835.715338                |
| Sum of electronic and thermal Enthalpies=    | -3835.714473                |
| Sum of electronic and thermal Free Energies= | -3835.779609                |

Number of Imaginary Frequencies = 1

E (Single Point Energy) [IEFPCM<sub>(DCM)</sub>M06-2X/6-311++G(2d,2p)] = -3838.741514

|   |             |             |             |
|---|-------------|-------------|-------------|
| C | -0.25432600 | 1.00616200  | -1.20608000 |
| H | 0.10022000  | 0.24048900  | -1.88925400 |
| C | -1.51923800 | 0.82501200  | -0.65342700 |
| N | -2.07996000 | -0.39461200 | -0.63564500 |
| C | -3.32519000 | -0.72861800 | 0.06197500  |
| H | -4.12106600 | -0.02068000 | -0.17848000 |
| C | -1.56347000 | -1.54017700 | -1.41500400 |
| H | -0.48617100 | -1.63529900 | -1.29422300 |
| H | -1.80371000 | -1.38461100 | -2.47525100 |
| C | -2.31492300 | -2.72735000 | -0.82538100 |
| H | -1.79894100 | -3.07268700 | 0.07688800  |
| H | -2.38374600 | -3.56104200 | -1.52570300 |
| C | -3.67720600 | -2.13149300 | -0.47118800 |

|   |             |             |             |
|---|-------------|-------------|-------------|
| H | -4.28941800 | -2.02335000 | -1.37098700 |
| H | -4.24206900 | -2.70992500 | 0.26136300  |
| C | -2.21085300 | 1.90945600  | 0.14492800  |
| H | -3.29351600 | 1.82183700  | 0.01761300  |
| H | -2.00476400 | 1.73160800  | 1.21012000  |
| C | 0.67681900  | 0.15826300  | 0.59483600  |
| H | 0.46827100  | 1.08220800  | 1.15741900  |
| C | 2.11400000  | 0.10218600  | 0.11337700  |
| O | 0.09173000  | -0.91347000 | 0.90586200  |
| C | -3.21694800 | -0.73601300 | 1.59656900  |
| O | -2.03566800 | -0.80554700 | 2.16055700  |
| O | -4.24542900 | -0.70340400 | 2.24833900  |
| C | 3.01772400  | -0.19491200 | 1.30947600  |
| H | 2.75227800  | 0.52660500  | 2.09562100  |
| C | 4.50908500  | -0.06972000 | 1.00833900  |
| H | 4.79987400  | -0.83727900 | 0.28321100  |
| H | 4.70102000  | 0.90175300  | 0.53595700  |
| H | 2.41379800  | 1.02931500  | -0.37343200 |
| H | 2.77773100  | -1.19273300 | 1.69301400  |
| C | 5.34872400  | -0.20594100 | 2.27654700  |
| H | 5.10159000  | 0.58067400  | 2.99657700  |
| H | 5.16829500  | -1.17149900 | 2.76004200  |
| H | 6.41652300  | -0.13604200 | 2.05337700  |
| H | -1.18194000 | -0.83953800 | 1.55194900  |
| C | -1.81066100 | 3.33572300  | -0.21975400 |
| C | 0.33320200  | 2.36929500  | -1.48077700 |
| H | -2.17591800 | 3.59750500  | -1.21749600 |
| H | -2.25177600 | 4.03334100  | 0.49401300  |

|    |             |             |             |
|----|-------------|-------------|-------------|
| H  | 1.41986500  | 2.30680600  | -1.57887800 |
| H  | -0.03742100 | 2.76637700  | -2.43314600 |
| S  | -0.01365800 | 3.58871200  | -0.17915800 |
| Br | 2.33153600  | -1.30122300 | -1.23025600 |

(R)-TS1<sub>T</sub>-Br-P

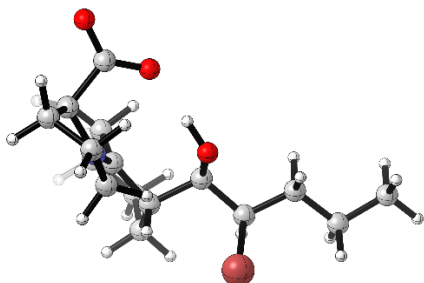

-----  
- Thermochemistry -  
-----

|                                              |                             |
|----------------------------------------------|-----------------------------|
| Zero-point correction=                       | 0.385715 (Hartree/Particle) |
| Thermal correction to Energy=                | 0.404101                    |
| Thermal correction to Enthalpy=              | 0.404966                    |
| Thermal correction to Gibbs Free Energy=     | 0.339578                    |
| Sum of electronic and zero-point Energies=   | -3835.762069                |
| Sum of electronic and thermal Energies=      | -3835.743683                |
| Sum of electronic and thermal Enthalpies=    | -3835.742818                |
| Sum of electronic and thermal Free Energies= | -3835.808206                |

Number of Imaginary Frequencies = 0

E (Single Point Energy) [IEFPCM(DCM)M06-2X/6-311++G(2d,2p)] = -3838.773806

|   |             |             |             |
|---|-------------|-------------|-------------|
| C | -0.07263300 | 0.78156100  | -0.80078200 |
| H | 0.05461100  | 0.07685100  | -1.62356300 |
| C | -1.51250700 | 0.79325800  | -0.37155500 |
| N | -2.25365900 | -0.23414900 | -0.62029000 |
| C | -3.56646100 | -0.48352900 | 0.01747400  |
| H | -4.20889600 | 0.39200900  | -0.07697600 |
| C | -1.83315500 | -1.42867400 | -1.42191600 |

|   |             |             |             |
|---|-------------|-------------|-------------|
| H | -0.81181300 | -1.70424800 | -1.16917800 |
| H | -1.90501300 | -1.14786900 | -2.47729900 |
| C | -2.85529300 | -2.49656000 | -1.04591400 |
| H | -2.52214800 | -3.02932500 | -0.14980700 |
| H | -2.98513600 | -3.22081100 | -1.85090000 |
| C | -4.11639200 | -1.68792500 | -0.74535900 |
| H | -4.59485300 | -1.36015500 | -1.67352000 |
| H | -4.84935500 | -2.22029000 | -0.13920500 |
| C | -2.00066200 | 1.91835700  | 0.49926300  |
| H | -3.08650800 | 1.89829100  | 0.59316800  |
| H | -1.59666200 | 1.72407000  | 1.50129800  |
| C | 0.72039100  | 0.22256200  | 0.42941900  |
| H | 0.63792000  | 0.95458500  | 1.24798100  |
| C | 2.21573600  | 0.10519800  | 0.15875400  |
| O | 0.23305100  | -1.02960700 | 0.82798800  |
| C | -3.36427800 | -0.79058200 | 1.54618700  |
| O | -2.18826100 | -0.75869700 | 1.99832300  |
| O | -4.41919800 | -1.02902200 | 2.15147300  |
| C | 2.96813700  | -0.49857700 | 1.33320900  |
| H | 2.63808000  | 0.04964500  | 2.22779900  |
| C | 4.48697500  | -0.39612200 | 1.21821500  |
| H | 4.82905500  | -0.99241500 | 0.36516400  |
| H | 4.76638800  | 0.64414600  | 1.00884800  |
| H | 2.63437500  | 1.07833100  | -0.10304800 |
| H | 2.65541200  | -1.53840400 | 1.46648400  |
| C | 5.17884100  | -0.87196500 | 2.49376100  |
| H | 4.87969800  | -0.26263800 | 3.35265900  |
| H | 4.91540400  | -1.91166800 | 2.71352800  |

|    |             |             |             |
|----|-------------|-------------|-------------|
| H  | 6.26647600  | -0.81315600 | 2.40086300  |
| H  | -0.63366800 | -0.93480200 | 1.29504200  |
| C  | -1.56953900 | 3.31197100  | 0.02926200  |
| C  | 0.42229900  | 2.13921900  | -1.31385900 |
| H  | -2.03017900 | 3.55951500  | -0.93170500 |
| H  | -1.90451800 | 4.04824700  | 0.76143500  |
| H  | 1.47868500  | 2.07299500  | -1.58160400 |
| H  | -0.12023500 | 2.40193300  | -2.22721300 |
| S  | 0.23102400  | 3.48769100  | -0.11554600 |
| Br | 2.51310300  | -1.00284000 | -1.44910700 |

(S)-TS1<sub>T</sub>-Br-Pre

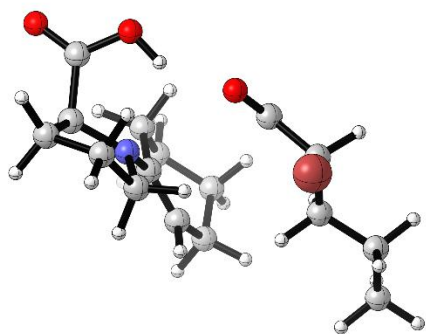

-----  
- Thermochemistry -  
-----

|                                              |                             |
|----------------------------------------------|-----------------------------|
| Zero-point correction=                       | 0.381503 (Hartree/Particle) |
| Thermal correction to Energy=                | 0.401362                    |
| Thermal correction to Enthalpy=              | 0.402227                    |
| Thermal correction to Gibbs Free Energy=     | 0.332670                    |
| Sum of electronic and zero-point Energies=   | -3835.741089                |
| Sum of electronic and thermal Energies=      | -3835.721230                |
| Sum of electronic and thermal Enthalpies=    | -3835.720365                |
| Sum of electronic and thermal Free Energies= | -3835.789922                |

Number of Imaginary Frequencies = 0

E (Single Point Energy) [IEFPCM(DCM)M06-2X/6-311++G(2d,2p)] = -3838.752357

|   |             |             |             |
|---|-------------|-------------|-------------|
| C | -0.17379100 | 1.52103000  | -1.29296600 |
| H | 0.22121900  | 0.87010400  | -2.06746100 |
| C | -1.25275300 | 1.12012400  | -0.58931600 |
| N | -1.78372300 | -0.16799300 | -0.72537800 |
| C | -3.23018400 | -0.39744500 | -0.69166600 |
| H | -3.80236400 | 0.44201100  | -1.10046400 |
| C | -1.12134700 | -1.14576500 | -1.58923500 |
| H | -0.11595400 | -1.35573300 | -1.20940800 |
| H | -1.03602100 | -0.77782900 | -2.62412000 |
| C | -2.06035300 | -2.34275700 | -1.52576900 |
| H | -1.91160300 | -2.88558100 | -0.58570900 |
| H | -1.91259400 | -3.03749300 | -2.35432100 |
| C | -3.43303400 | -1.66557200 | -1.55661600 |
| H | -3.67385700 | -1.35772300 | -2.57790400 |
| H | -4.25030700 | -2.28817800 | -1.18756600 |
| C | -1.90760200 | 1.95466500  | 0.49102900  |
| H | -2.99746100 | 1.93263800  | 0.36642600  |
| H | -1.69877300 | 1.48850800  | 1.46369100  |
| C | 0.80563300  | -0.27996400 | 1.42640800  |
| H | 0.68046800  | 0.77607200  | 1.73305900  |
| C | 2.21459600  | -0.61909200 | 0.99983200  |
| O | -0.11482800 | -1.06377100 | 1.47579500  |
| C | -3.77017300 | -0.64090600 | 0.71874200  |
| O | -2.89126100 | -0.97098000 | 1.65875900  |
| O | -4.95621600 | -0.57909300 | 0.96279100  |
| C | 2.79630100  | 0.42067100  | 0.05011100  |
| H | 2.27870600  | 0.35603400  | -0.91373900 |
| C | 4.30548500  | 0.30733200  | -0.14752600 |



|    |             |             |             |
|----|-------------|-------------|-------------|
| H  | 4.79380300  | 0.25892600  | 0.83365500  |
| H  | 4.53607100  | -0.63065400 | -0.66336200 |
| H  | 2.81011500  | -0.65983800 | 1.91993800  |
| H  | 2.55919800  | 1.40576500  | 0.47887600  |
| C  | 4.85024800  | 1.49269100  | -0.94077600 |
| H  | 4.37379800  | 1.55467200  | -1.92502000 |
| H  | 4.66031900  | 2.43443200  | -0.41553100 |
| H  | 5.92845800  | 1.40390900  | -1.09570400 |
| H  | -1.96886200 | -0.92600800 | 1.32252600  |
| C  | -1.47407900 | 3.41482400  | 0.51672600  |
| C  | 0.54941500  | 2.83250900  | -1.13925200 |
| H  | -1.87597000 | 3.95759000  | -0.34455100 |
| H  | -1.83829700 | 3.90145100  | 1.42313300  |
| H  | 1.62542600  | 2.69088200  | -1.27745500 |
| H  | 0.22691400  | 3.55532600  | -1.89817500 |
| S  | 0.33493100  | 3.58615800  | 0.50119500  |
| Br | 2.30351400  | -2.40671900 | 0.24573100  |

(*S*)-TS1<sub>T</sub>-Br

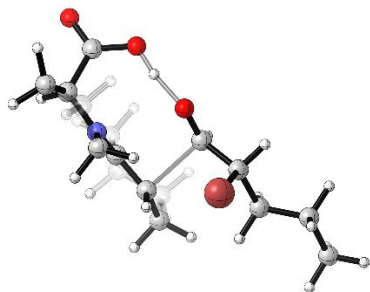

-----  
- Thermochemistry -  
-----

|                                              |                             |
|----------------------------------------------|-----------------------------|
| Zero-point correction=                       | 0.383176 (Hartree/Particle) |
| Thermal correction to Energy=                | 0.401127                    |
| Thermal correction to Enthalpy=              | 0.401992                    |
| Thermal correction to Gibbs Free Energy=     | 0.338653                    |
| Sum of electronic and zero-point Energies=   | -1363.732980                |
| Sum of electronic and thermal Energies=      | -1363.715029                |
| Sum of electronic and thermal Enthalpies=    | -1363.714164                |
| Sum of electronic and thermal Free Energies= | -1363.777503                |

Number of Imaginary Frequencies = 1

E (Single Point Energy) [IEFPCM(DCM)M06-2X/6-311++G(2d,2p)] = -1364.414632

|   |             |             |             |
|---|-------------|-------------|-------------|
| C | 0.08134300  | 1.15049800  | -1.12315300 |
| H | 0.47068800  | 0.53827400  | -1.93191900 |
| C | -1.17308000 | 0.81690100  | -0.61974100 |
| N | -1.65918300 | -0.42377600 | -0.78693100 |
| C | -2.89563400 | -0.92522500 | -0.17905400 |
| H | -3.73096300 | -0.24254200 | -0.34946000 |
| C | -1.06125700 | -1.41343900 | -1.70624400 |
| H | 0.01943000  | -1.44754400 | -1.58071600 |
| H | -1.30333400 | -1.12994500 | -2.73939800 |
| C | -1.73773400 | -2.71670300 | -1.29975600 |
| H | -1.21359100 | -3.14554600 | -0.43913300 |
| H | -1.73896700 | -3.45058000 | -2.10708500 |
| C | -3.14291400 | -2.26348500 | -0.90369900 |
| H | -3.74615300 | -2.07541100 | -1.79640200 |
| H | -3.67962300 | -2.97032200 | -0.26923700 |
| C | -1.94727500 | 1.72926500  | 0.30776900  |
| H | -3.01866300 | 1.59578800  | 0.13182700  |
| H | -1.75437800 | 1.41449200  | 1.34250600  |
| C | 1.11866300  | 0.03795800  | 0.45709000  |

|   |             |             |             |
|---|-------------|-------------|-------------|
| H | 1.05665500  | 0.91720100  | 1.11645500  |
| C | 2.44888500  | -0.12043500 | -0.25974100 |
| O | 0.48587200  | -1.01705400 | 0.73270200  |
| C | -2.82984700 | -1.13132200 | 1.34463700  |
| O | -1.66554200 | -1.17314300 | 1.94492400  |
| O | -3.87626200 | -1.27480500 | 1.95136400  |
| C | 3.49203000  | -0.68926900 | 0.69002900  |
| H | 3.55520000  | -0.02728000 | 1.56341900  |
| C | 4.86895100  | -0.82826300 | 0.04205500  |
| H | 4.78741300  | -1.46727500 | -0.84369000 |
| H | 5.20507900  | 0.15636700  | -0.30618700 |
| H | 2.79229400  | 0.82726600  | -0.68577200 |
| H | 3.13031000  | -1.66146600 | 1.04574500  |
| C | 5.89537600  | -1.41292100 | 1.01018500  |
| H | 6.00568700  | -0.77665000 | 1.89432400  |
| H | 5.58744900  | -2.40706700 | 1.34967300  |
| H | 6.87677800  | -1.50730000 | 0.53787500  |
| H | -0.79970500 | -1.06031100 | 1.37065800  |
| C | -1.62818200 | 3.21180600  | 0.15934000  |
| C | 0.63339100  | 2.55659000  | -1.11490700 |
| H | -1.96564100 | 3.58896200  | -0.81093900 |
| H | -2.14067600 | 3.77847900  | 0.93845100  |
| H | 1.72668600  | 2.53770900  | -1.11144200 |
| H | 0.33644400  | 3.09660000  | -2.02139800 |
| S | 0.14583900  | 3.54310000  | 0.33037200  |
| F | 2.28151100  | -1.01075400 | -1.32626200 |

(S)-TS1<sub>T</sub>-Br-P

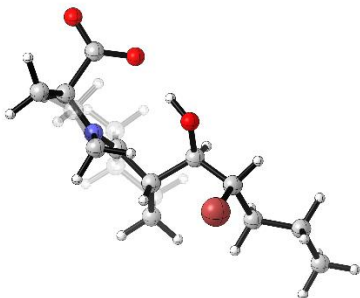

-----  
 - Thermochemistry -  
 -----

|                                              |                             |
|----------------------------------------------|-----------------------------|
| Zero-point correction=                       | 0.385628 (Hartree/Particle) |
| Thermal correction to Energy=                | 0.404013                    |
| Thermal correction to Enthalpy=              | 0.404878                    |
| Thermal correction to Gibbs Free Energy=     | 0.339134                    |
| Sum of electronic and zero-point Energies=   | -3835.757857                |
| Sum of electronic and thermal Energies=      | -3835.739472                |
| Sum of electronic and thermal Enthalpies=    | -3835.738607                |
| Sum of electronic and thermal Free Energies= | -3835.804351                |

Number of Imaginary Frequencies = 0

E (Single Point Energy) [IEFPCM(DCM)M06-2X/6-311++G(2d,2p)] = -3838.769222

|   |             |             |             |
|---|-------------|-------------|-------------|
| C | 0.12902500  | 0.44852500  | -0.71182100 |
| H | 0.20502200  | -0.43613700 | -1.34625900 |
| C | -1.32322000 | 0.78237100  | -0.49936500 |
| N | -2.21734600 | -0.13327400 | -0.66366200 |
| C | -3.62700700 | -0.00610500 | -0.22645300 |
| H | -4.05930500 | 0.91797700  | -0.61090800 |
| C | -1.94395400 | -1.53037600 | -1.12948500 |
| H | -1.03717300 | -1.90484900 | -0.65860800 |
| H | -1.82269400 | -1.49133100 | -2.21637300 |
| C | -3.19685200 | -2.29927200 | -0.72301400 |
| H | -3.09394700 | -2.65716000 | 0.30606300  |
| H | -3.36225400 | -3.15868000 | -1.37373000 |
| C | -4.30047600 | -1.24634200 | -0.81249700 |

|   |             |             |             |
|---|-------------|-------------|-------------|
| H | -4.57941500 | -1.06760000 | -1.85558500 |
| H | -5.19719900 | -1.49599500 | -0.24549100 |
| C | -1.67670800 | 2.13226500  | 0.06316700  |
| H | -2.75404100 | 2.29545600  | 0.05069400  |
| H | -1.37822700 | 2.10667100  | 1.11934700  |
| C | 0.68649400  | 0.06476200  | 0.69960000  |
| H | 0.76298100  | 0.98221200  | 1.30328400  |
| C | 2.09176900  | -0.53866700 | 0.69391900  |
| O | -0.14264700 | -0.88218300 | 1.32567700  |
| C | -3.70128200 | 0.02432600  | 1.34365400  |
| O | -2.61483500 | -0.01494000 | 1.98030500  |
| O | -4.85622200 | 0.09576100  | 1.78799100  |
| C | 3.27447300  | 0.38591600  | 0.42222700  |
| H | 3.47167000  | 0.46545400  | -0.65113700 |
| C | 4.54970300  | -0.08346800 | 1.12358700  |
| H | 4.37122000  | -0.11883300 | 2.20480600  |
| H | 4.77850000  | -1.10781400 | 0.80548000  |
| H | 2.20563100  | -0.99022300 | 1.68162100  |
| H | 3.01234400  | 1.39185600  | 0.77985800  |
| C | 5.73315600  | 0.83141500  | 0.82043600  |
| H | 5.94313700  | 0.85351700  | -0.25381700 |
| H | 5.52692400  | 1.85706400  | 1.14332400  |
| H | 6.63703500  | 0.49240800  | 1.33297800  |
| H | -1.01930500 | -0.50627800 | 1.58735700  |
| C | -0.98461400 | 3.30855900  | -0.63413600 |
| C | 0.87336500  | 1.57132100  | -1.44729800 |
| H | -1.31994700 | 3.40117900  | -1.67148300 |
| H | -1.24795600 | 4.22973800  | -0.11220900 |

|    |            |             |             |
|----|------------|-------------|-------------|
| H  | 1.91813400 | 1.29884300  | -1.58778400 |
| H  | 0.44089800 | 1.69192100  | -2.44557200 |
| S  | 0.82459800 | 3.17450200  | -0.60182600 |
| Br | 2.15234900 | -2.10197100 | -0.50451200 |

**Supplementary Table 7.** Energies for enamine addition to 2-chloropentanal. Reported energies for structures optimized at the IEFPCM<sub>(DCM)</sub>M06-2X/6-311++G(2d,2p)//IEFPCM<sub>(DCM)</sub>M06-2X/6-31+G(d,p) level of theory represent the sum of the thermal correction to Gibbs Free Energy computed at the IEFPCM<sub>(DCM)</sub>M06-2X/6-31+G(d,p) level of theory and single point energies computed at the IEFPCM<sub>(DCM)</sub>M06-2X/6-311++G(2d,2p). All energies are reported in Hartrees.

| <b>Structure</b>                          | <b>Single Point Energies, E<br/>IEFPCM<sub>(DCM)</sub>M06-2X/6-311++G(2d,2p)</b> | <b>Thermal Corrections to Gibbs Free Energies,<br/>IEFPCM<sub>(DCM)</sub>M06-2X/6-31+G(d,p)</b> | <b>Gibbs Free Energies (G),<br/>IEFPCM<sub>(DCM)</sub>M06-2X/6-31+G(d,p)</b> | <b>Gibbs Free Energies (G),<br/>IEFPCM<sub>(DCM)</sub>M06-2X/6-311++G(2d,2p)//<br/>IEFPCM<sub>(DCM)</sub>M06-2X/6-31+G(d,p)</b> |
|-------------------------------------------|----------------------------------------------------------------------------------|-------------------------------------------------------------------------------------------------|------------------------------------------------------------------------------|---------------------------------------------------------------------------------------------------------------------------------|
| Chloropentanal                            | -731.33393130                                                                    | 0.102879                                                                                        | -731.121809                                                                  | -731.2310523                                                                                                                    |
| Enamine of Cyclohexanone (G)              | -634.55147535                                                                    | 0.238392                                                                                        | -634.142903                                                                  | -634.3130834                                                                                                                    |
| Enamine of Dioxane (O)                    | -784.98483791                                                                    | 0.244077                                                                                        | -784.522619                                                                  | -784.7407609                                                                                                                    |
| Enamine of Tetrahydro-4H-thiopyranone (T) | -993.43210840                                                                    | 0.210205                                                                                        | -993.028735                                                                  | -993.2219034                                                                                                                    |
| Enamine of Tetrahydro-4H-pyranone (P)     | -670.45469021                                                                    | 0.214793                                                                                        | -670.055312                                                                  | -670.2398972                                                                                                                    |
| ( <i>R</i> )-TS <sub>2P</sub> -Cl-Pre     | -1401.805196                                                                     | 0.337854                                                                                        | -1401.173571                                                                 | -1401.467342                                                                                                                    |
| ( <i>R</i> )-TS <sub>2P</sub> -Cl         | -1401.790092                                                                     | 0.341689                                                                                        | -1401.156596                                                                 | -1401.448403                                                                                                                    |
| ( <i>R</i> )-TS <sub>2P</sub> -Cl-P       | -1401.820368                                                                     | 0.345347                                                                                        | -1401.183637                                                                 | -1401.475021                                                                                                                    |
| ( <i>S</i> )-TS <sub>2P</sub> -Cl-Pre     | -1401.806134                                                                     | 0.33645                                                                                         | -1401.17629                                                                  | -1401.469684                                                                                                                    |
| ( <i>S</i> )-TS <sub>2P</sub> -Cl         | -1401.796294                                                                     | 0.340244                                                                                        | -1401.164151                                                                 | -1401.45605                                                                                                                     |
| ( <i>S</i> )-TS <sub>2P</sub> -Cl-P       | -1401.825541                                                                     | 0.344533                                                                                        | -1401.189579                                                                 | -1401.481008                                                                                                                    |
| ( <i>R</i> )-TS <sub>2G</sub> -Cl-Pre     | -1365.902257                                                                     | 0.361551                                                                                        | -1365.261681                                                                 | -1365.540706                                                                                                                    |
| ( <i>R</i> )-TS <sub>2G</sub> -Cl         | -1365.887212                                                                     | 0.365714                                                                                        | -1365.244059                                                                 | -1365.521498                                                                                                                    |
| ( <i>R</i> )-TS <sub>2G</sub> -Cl-P       | -1365.918402                                                                     | 0.369157                                                                                        | -1365.272168                                                                 | -1365.549245                                                                                                                    |
| ( <i>S</i> )-TS <sub>2G</sub> -Cl-Pre     | -1365.903542                                                                     | 0.361695                                                                                        | -1365.262706                                                                 | -1365.541847                                                                                                                    |
| ( <i>S</i> )-TS <sub>2G</sub> -Cl         | -1365.893626                                                                     | 0.364656                                                                                        | -1365.251485                                                                 | -1365.52897                                                                                                                     |
| ( <i>S</i> )-TS <sub>2G</sub> -Cl-P       | -1365.924651                                                                     | 0.368381                                                                                        | -1365.279269                                                                 | -1365.55627                                                                                                                     |
| ( <i>R</i> )-TS <sub>2O</sub> -Cl-Pre     | -1516.336462                                                                     | 0.365492                                                                                        | -1515.644382                                                                 | -1515.97097                                                                                                                     |
| ( <i>R</i> )-TS <sub>2O</sub> -Cl         | -1516.319381                                                                     | 0.369078                                                                                        | -1515.62514                                                                  | -1515.950303                                                                                                                    |

|                                       |              |          |              |              |
|---------------------------------------|--------------|----------|--------------|--------------|
| ( <i>R</i> )-TS2 <sub>O</sub> -Cl-P   | -1516.346706 | 0.372289 | -1515.64974  | -1515.974417 |
| ( <i>S</i> )-TS2 <sub>O</sub> -Cl-Pre | -1516.338534 | 0.366524 | -1515.645123 | -1515.97201  |
| ( <i>S</i> )-TS2 <sub>O</sub> -Cl     | -1516.32557  | 0.369297 | -1515.630967 | -1515.956273 |
| ( <i>S</i> )-TS2 <sub>O</sub> -Cl-P   | -1516.350766 | 0.37202  | -1515.653866 | -1515.978746 |
| ( <i>R</i> )-TS2 <sub>T</sub> -Cl-Pre | -1724.781246 | 0.33334  | -1724.145143 | -1724.447906 |
| ( <i>R</i> )-TS2 <sub>T</sub> -Cl     | -1724.766523 | 0.337245 | -1724.128796 | -1724.429278 |
| ( <i>R</i> )-TS2 <sub>T</sub> -Cl-P   | -1724.794106 | 0.341075 | -1724.153172 | -1724.453031 |
| ( <i>S</i> )-TS2 <sub>T</sub> -Cl-Pre | -1724.783329 | 0.334442 | -1724.146124 | -1724.448887 |
| ( <i>S</i> )-TS2 <sub>T</sub> -Cl     | -1724.773577 | 0.336784 | -1724.136217 | -1724.436793 |
| ( <i>S</i> )-TS2 <sub>T</sub> -Cl-P   | -1724.801604 | 0.34048  | -1724.161179 | -1724.461124 |

Pre – Precomplex

P – Product

(*R*)-TS2<sub>P</sub>-Cl-Pre

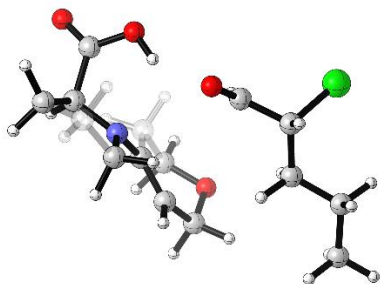

-----  
- Thermochemistry -  
-----

|                                              |                             |
|----------------------------------------------|-----------------------------|
| Zero-point correction=                       | 0.385733 (Hartree/Particle) |
| Thermal correction to Energy=                | 0.405077                    |
| Thermal correction to Enthalpy=              | 0.405942                    |
| Thermal correction to Gibbs Free Energy=     | 0.337854                    |
| Sum of electronic and zero-point Energies=   | -1401.125691                |
| Sum of electronic and thermal Energies=      | -1401.106347                |
| Sum of electronic and thermal Enthalpies=    | -1401.105482                |
| Sum of electronic and thermal Free Energies= | -1401.173571                |



Number of Imaginary Frequencies = 0

E (Single Point Energy) [IEFPCM<sub>(DCM)</sub>M06-2X/6-311++G(2d,2p)] = -1401.805196

|   |             |             |             |
|---|-------------|-------------|-------------|
| C | -0.03542800 | 1.86595000  | 0.80552100  |
| H | -0.13136300 | 1.72320300  | 1.87713800  |
| C | 0.96057200  | 1.28564400  | 0.10718100  |
| N | 1.85065000  | 0.37096200  | 0.66795300  |
| C | 3.21554300  | 0.22601600  | 0.16702100  |
| H | 3.64447800  | 1.16706500  | -0.19124700 |
| C | 1.76801900  | 0.05131700  | 2.09160700  |
| H | 0.79330200  | -0.39399000 | 2.31486700  |
| H | 1.88812100  | 0.95629900  | 2.70874100  |
| C | 2.93456500  | -0.90873700 | 2.29095200  |
| H | 2.65580100  | -1.91125500 | 1.94828500  |
| H | 3.25001500  | -0.97722500 | 3.33342300  |
| C | 4.01153200  | -0.30159500 | 1.38679500  |
| H | 4.48397100  | 0.54838300  | 1.88647400  |
| H | 4.79639200  | -1.00281700 | 1.09597800  |
| C | 1.09607800  | 1.53051800  | -1.37911300 |
| H | 2.12789100  | 1.79261800  | -1.63908700 |
| H | 0.86005400  | 0.60947300  | -1.92927100 |
| C | -0.89008100 | -1.45774700 | -0.23728900 |
| H | -0.69290800 | -0.86891600 | -1.15269800 |
| C | -2.34149900 | -1.56443000 | 0.16569600  |
| O | 0.00916500  | -1.97356800 | 0.39096400  |
| C | 3.31194200  | -0.76453300 | -0.99344600 |
| O | 2.35831600  | -1.68932200 | -1.07562000 |
| O | 4.23545100  | -0.74653700 | -1.77782800 |
| C | -2.90514700 | -0.18909700 | 0.49699700  |

|    |             |             |             |
|----|-------------|-------------|-------------|
| H  | -2.29874400 | 0.19997300  | 1.32734300  |
| C  | -4.37831400 | -0.19343900 | 0.89842800  |
| H  | -4.98220900 | -0.57610600 | 0.06933400  |
| H  | -4.52062000 | -0.88026700 | 1.74146700  |
| H  | -2.44565200 | -2.26937500 | 0.99231000  |
| H  | -2.74042800 | 0.47826300  | -0.35994500 |
| C  | -4.85212700 | 1.20790300  | 1.27862700  |
| H  | -4.27459300 | 1.60299700  | 2.12102900  |
| H  | -5.90653800 | 1.20313500  | 1.56608800  |
| H  | -4.73620100 | 1.89877800  | 0.43692800  |
| H  | 1.66373300  | -1.56230900 | -0.39015400 |
| Cl | -3.18226900 | -2.29924500 | -1.25843700 |
| C  | 0.17973500  | 2.66580500  | -1.82724700 |
| C  | -1.06519700 | 2.73940600  | 0.13848900  |
| H  | 0.60798000  | 3.63472600  | -1.52927800 |
| H  | 0.05685000  | 2.65987000  | -2.91158000 |
| H  | -2.06733700 | 2.51817800  | 0.51913700  |
| H  | -0.86868300 | 3.80572800  | 0.34072800  |
| O  | -1.11298600 | 2.53144200  | -1.26246000 |

**(R)-TS2<sub>p</sub>-Cl**

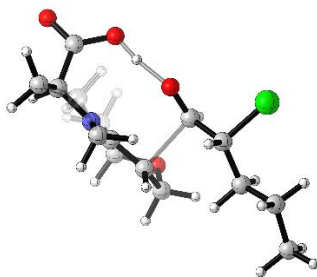

-----  
 - Thermochemistry -  
 -----

|                                              |                             |
|----------------------------------------------|-----------------------------|
| Zero-point correction=                       | 0.385675 (Hartree/Particle) |
| Thermal correction to Energy=                | 0.403307                    |
| Thermal correction to Enthalpy=              | 0.404172                    |
| Thermal correction to Gibbs Free Energy=     | 0.341689                    |
| Sum of electronic and zero-point Energies=   | -1401.112610                |
| Sum of electronic and thermal Energies=      | -1401.094979                |
| Sum of electronic and thermal Enthalpies=    | -1401.094113                |
| Sum of electronic and thermal Free Energies= | -1401.156596                |

Number of Imaginary Frequencies = 1

E (Single Point Energy) [IEFPCM(DCM)M06-2X/6-311++G(2d,2p)] = -1401.790092

|   |             |             |             |
|---|-------------|-------------|-------------|
| C | -0.35156100 | 1.19807000  | 0.75817100  |
| H | -0.76364900 | 0.67329000  | 1.61569300  |
| C | 1.01853800  | 1.08759800  | 0.52163100  |
| N | 1.71434700  | 0.02228500  | 0.92678100  |
| C | 3.12860700  | -0.21718100 | 0.61863100  |
| H | 3.73484300  | 0.66194900  | 0.84827000  |
| C | 1.17181000  | -0.99783100 | 1.84237200  |
| H | 0.17169000  | -1.29125500 | 1.52668000  |
| H | 1.12637000  | -0.58206500 | 2.85723000  |
| C | 2.18188800  | -2.13361400 | 1.73288700  |
| H | 1.95167900  | -2.74241700 | 0.85240400  |
| H | 2.17701400  | -2.77758300 | 2.61334600  |
| C | 3.50579100  | -1.39131300 | 1.54376900  |
| H | 3.85509800  | -0.99079200 | 2.49958700  |
| H | 4.30208100  | -2.00044800 | 1.11436300  |
| C | 1.69793200  | 2.06805200  | -0.40241200 |
| H | 2.72810300  | 2.25023300  | -0.08448700 |
| H | 1.73883700  | 1.63088300  | -1.40933400 |
| C | -0.85562600 | -0.27027600 | -0.78545000 |
| H | -0.97727800 | 0.56491400  | -1.49257600 |

|    |             |             |             |
|----|-------------|-------------|-------------|
| C  | -2.15670500 | -0.87777200 | -0.24757200 |
| O  | 0.10063600  | -1.08389500 | -0.90819600 |
| C  | 3.42741700  | -0.55699000 | -0.85297000 |
| O  | 2.44812300  | -0.87875700 | -1.66174300 |
| O  | 4.58851900  | -0.53463500 | -1.21837500 |
| C  | -3.27930300 | 0.03619400  | 0.21410800  |
| H  | -2.90660000 | 0.61356400  | 1.06734400  |
| C  | -4.53928300 | -0.70356300 | 0.66760400  |
| H  | -4.98479100 | -1.23097900 | -0.18066100 |
| H  | -4.26066300 | -1.46715200 | 1.40499400  |
| H  | -1.89873200 | -1.60939400 | 0.52293600  |
| H  | -3.53049000 | 0.74607200  | -0.58412600 |
| C  | -5.56197800 | 0.25548100  | 1.27366300  |
| H  | -5.15246400 | 0.76538400  | 2.15173500  |
| H  | -6.46529700 | -0.27618000 | 1.58361800  |
| H  | -5.85511400 | 1.02092800  | 0.54771600  |
| H  | 1.47615200  | -0.88777800 | -1.29005500 |
| Cl | -2.76064400 | -1.88680000 | -1.65305200 |
| C  | 0.93500300  | 3.38523800  | -0.45339400 |
| C  | -1.04968600 | 2.49278900  | 0.38345000  |
| H  | 1.04480100  | 3.93075200  | 0.49552400  |
| H  | 1.30941200  | 4.01399800  | -1.26234900 |
| H  | -2.08036800 | 2.31376400  | 0.07481600  |
| H  | -1.07743000 | 3.17481300  | 1.24888000  |
| O  | -0.43349600 | 3.14301200  | -0.71094400 |

(R)-TS2<sub>p</sub>-Cl-P

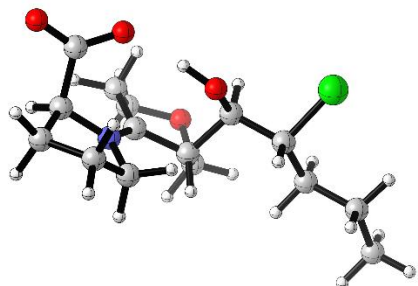

-----  
- Thermochemistry -  
-----

|                                              |                             |
|----------------------------------------------|-----------------------------|
| Zero-point correction=                       | 0.389864 (Hartree/Particle) |
| Thermal correction to Energy=                | 0.407526                    |
| Thermal correction to Enthalpy=              | 0.408391                    |
| Thermal correction to Gibbs Free Energy=     | 0.345347                    |
| Sum of electronic and zero-point Energies=   | -1401.139120                |
| Sum of electronic and thermal Energies=      | -1401.121458                |
| Sum of electronic and thermal Enthalpies=    | -1401.120593                |
| Sum of electronic and thermal Free Energies= | -1401.183637                |

Number of Imaginary Frequencies = 0

E (Single Point Energy) [IEFPCM<sub>(DCM)</sub>M06-2X/6-311++G(2d,2p)] = -1401.820368

|   |             |             |            |
|---|-------------|-------------|------------|
| C | -0.42826200 | 0.78308600  | 0.55196000 |
| H | -0.61517200 | 0.22567200  | 1.47451500 |
| C | 1.06180600  | 0.89722400  | 0.33872000 |
| N | 1.86676800  | 0.03941200  | 0.86896300 |
| C | 3.31069900  | -0.05899100 | 0.54981600 |
| H | 3.78097500  | 0.92014000  | 0.64868800 |
| C | 1.44839200  | -1.10342300 | 1.73531200 |
| H | 0.55751800  | -1.56636500 | 1.31583800 |
| H | 1.23921200  | -0.70525200 | 2.73279600 |
| C | 2.66417100  | -2.02603400 | 1.73260600 |

|   |             |             |             |
|---|-------------|-------------|-------------|
| H | 2.61435900  | -2.70149100 | 0.87297100  |
| H | 2.71019700  | -2.62544300 | 2.64254000  |
| C | 3.83654000  | -1.05785200 | 1.57910400  |
| H | 4.04471100  | -0.55157700 | 2.52696700  |
| H | 4.75239200  | -1.52612200 | 1.21928200  |
| C | 1.55006200  | 1.95000000  | -0.61309900 |
| H | 2.63648200  | 2.00989400  | -0.62695000 |
| H | 1.25007900  | 1.60453500  | -1.61340600 |
| C | -0.98062700 | -0.06670200 | -0.65385100 |
| H | -1.15548000 | 0.61467800  | -1.49944600 |
| C | -2.29359000 | -0.79331500 | -0.31147800 |
| O | -0.10381900 | -1.10950100 | -1.00718900 |
| C | 3.51629400  | -0.55633700 | -0.92729900 |
| O | 2.49241100  | -0.69056500 | -1.64646800 |
| O | 4.70483900  | -0.74878100 | -1.22756600 |
| C | -3.39976900 | -0.02777900 | 0.39765700  |
| H | -2.98589000 | 0.34329100  | 1.34361500  |
| C | -4.62690300 | -0.87887500 | 0.72844200  |
| H | -5.10991200 | -1.20543100 | -0.19706000 |
| H | -4.30288600 | -1.78637900 | 1.25363900  |
| H | -2.01956000 | -1.67519600 | 0.27674700  |
| H | -3.69993600 | 0.84300400  | -0.19875400 |
| C | -5.62665900 | -0.10916000 | 1.58924400  |
| H | -5.17783300 | 0.19130700  | 2.54166700  |
| H | -6.50765700 | -0.71752600 | 1.80937400  |
| H | -5.96429900 | 0.79765600  | 1.07683500  |
| H | 0.78803300  | -0.82066100 | -1.31333500 |
| C | 0.91508700  | 3.31882900  | -0.34401600 |

|    |             |             |             |
|----|-------------|-------------|-------------|
| C  | -1.06041700 | 2.18846800  | 0.69557900  |
| H  | 1.25550800  | 3.70278900  | 0.62507400  |
| H  | 1.26397900  | 4.01618400  | -1.10969900 |
| H  | -2.14609800 | 2.10686100  | 0.68037700  |
| H  | -0.79275600 | 2.56903800  | 1.68885800  |
| C  | -0.60253000 | 3.19958000  | -0.35399900 |
| H  | -1.06503600 | 4.16731900  | -0.13944900 |
| H  | -0.94180400 | 2.90216600  | -1.35410000 |
| Cl | -2.93704300 | -1.46885400 | -1.87522000 |

(S)-TS2<sub>P</sub>-Cl-Pre

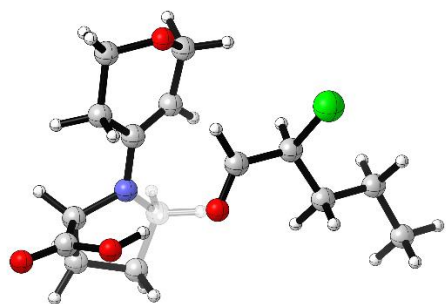

-----  
- Thermochemistry -  
-----

|                                              |                             |
|----------------------------------------------|-----------------------------|
| Zero-point correction=                       | 0.385207 (Hartree/Particle) |
| Thermal correction to Energy=                | 0.404644                    |
| Thermal correction to Enthalpy=              | 0.405509                    |
| Thermal correction to Gibbs Free Energy=     | 0.336450                    |
| Sum of electronic and zero-point Energies=   | -1401.127532                |
| Sum of electronic and thermal Energies=      | -1401.108095                |
| Sum of electronic and thermal Enthalpies=    | -1401.107230                |
| Sum of electronic and thermal Free Energies= | -1401.176290                |

Number of Imaginary Frequencies = 0

E (Single Point Energy) [IEFPCM(DCM)M06-2X/6-311++G(2d,2p)] = -1401.806134

|   |             |            |             |
|---|-------------|------------|-------------|
| C | -0.23490100 | 1.27332000 | -1.56444800 |
| H | 0.22284600  | 0.57226900 | -2.25558100 |

|   |             |             |             |
|---|-------------|-------------|-------------|
| C | -1.26920500 | 0.90865700  | -0.77840400 |
| N | -1.70676000 | -0.40503700 | -0.66546700 |
| C | -3.08073100 | -0.74480800 | -0.30248500 |
| H | -3.81164600 | -0.02412600 | -0.68215500 |
| C | -1.08892600 | -1.45736100 | -1.47114700 |
| H | -0.02377000 | -1.53334600 | -1.22784400 |
| H | -1.18430800 | -1.23861600 | -2.54632400 |
| C | -1.89019700 | -2.69627700 | -1.08861700 |
| H | -1.53256100 | -3.09215000 | -0.13188700 |
| H | -1.82242600 | -3.48757300 | -1.83692600 |
| C | -3.30661700 | -2.13241100 | -0.94773800 |
| H | -3.75199600 | -1.98893800 | -1.93602100 |
| H | -3.98056700 | -2.75469300 | -0.35635300 |
| C | -1.91068500 | 1.91560700  | 0.14810900  |
| H | -3.00340300 | 1.86377900  | 0.08889600  |
| H | -1.63704200 | 1.68328600  | 1.18688100  |
| C | 1.14972200  | 0.31321600  | 0.95643300  |
| H | 0.82672700  | 1.35036100  | 1.15097100  |
| C | 2.49203400  | 0.15632400  | 0.25966000  |
| H | 2.37871400  | 0.50350600  | -0.77345500 |
| O | 0.48361400  | -0.64235200 | 1.29528200  |
| C | -3.30277500 | -0.82453200 | 1.21052000  |
| O | -2.22652900 | -0.88961600 | 1.98775000  |
| O | -4.41853700 | -0.86662300 | 1.68180500  |
| H | -1.39436700 | -0.79815200 | 1.47376700  |
| C | 3.04396300  | -1.25611000 | 0.30505100  |
| H | 2.25985700  | -1.90983800 | -0.09775100 |
| C | 4.33207400  | -1.44291900 | -0.49305700 |



|    |             |             |             |
|----|-------------|-------------|-------------|
| H  | 4.16863400  | -1.11156300 | -1.52632400 |
| H  | 3.19079600  | -1.55080300 | 1.35082900  |
| C  | 4.79479200  | -2.89838600 | -0.48259400 |
| H  | 5.72078000  | -3.02223500 | -1.04994900 |
| H  | 4.97852000  | -3.24059100 | 0.54088800  |
| H  | 4.03744400  | -3.55395600 | -0.92430100 |
| H  | 5.11713100  | -0.80273600 | -0.07674200 |
| Cl | 3.60461200  | 1.35406200  | 1.03857500  |
| C  | 0.35544500  | 2.65943100  | -1.51111800 |
| C  | -1.46082900 | 3.32789600  | -0.20657600 |
| H  | 1.44982600  | 2.61258900  | -1.46553800 |
| H  | 0.09285000  | 3.23703900  | -2.41274800 |
| H  | -1.94250200 | 3.65860500  | -1.13881400 |
| H  | -1.71949600 | 4.03026000  | 0.58740300  |
| O  | -0.05230900 | 3.37408500  | -0.35733100 |

(S)-TS2<sub>P</sub>-Cl

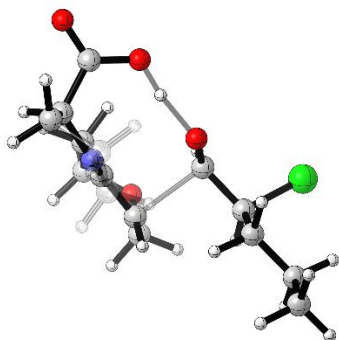

-----  
 - Thermochemistry -  
 -----

|                                            |                             |
|--------------------------------------------|-----------------------------|
| Zero-point correction=                     | 0.385109 (Hartree/Particle) |
| Thermal correction to Energy=              | 0.402973                    |
| Thermal correction to Enthalpy=            | 0.403838                    |
| Thermal correction to Gibbs Free Energy=   | 0.340244                    |
| Sum of electronic and zero-point Energies= | -1401.119287                |

|                                              |              |
|----------------------------------------------|--------------|
| Sum of electronic and thermal Energies=      | -1401.101422 |
| Sum of electronic and thermal Enthalpies=    | -1401.100557 |
| Sum of electronic and thermal Free Energies= | -1401.164151 |

Number of Imaginary Frequencies = 1

E (Single Point Energy) [IEFPCM<sub>(DCM)</sub>M06-2X/6-311++G(2d,2p)] = -1401.796294

|   |             |             |             |
|---|-------------|-------------|-------------|
| C | 0.14636200  | 1.08200700  | -1.24340000 |
| H | 0.68652100  | 0.36224800  | -1.85227600 |
| C | -1.16385600 | 0.79473300  | -0.86835500 |
| N | -1.62341200 | -0.45948500 | -0.80907800 |
| C | -2.93871300 | -0.83788600 | -0.28401800 |
| H | -3.72950700 | -0.21799900 | -0.71186400 |
| C | -0.90015800 | -1.61626000 | -1.37034900 |
| H | 0.14150600  | -1.59463900 | -1.05576400 |
| H | -0.95597900 | -1.57756900 | -2.46593100 |
| C | -1.65574900 | -2.81065800 | -0.79832900 |
| H | -1.28014000 | -3.03447800 | 0.20570500  |
| H | -1.54584400 | -3.70266600 | -1.41656800 |
| C | -3.09719500 | -2.30357300 | -0.73279900 |
| H | -3.55080200 | -2.32158800 | -1.72779400 |
| H | -3.73767900 | -2.86509400 | -0.05152500 |
| C | -2.02226100 | 1.89545900  | -0.29386700 |
| H | -3.07013300 | 1.75475700  | -0.57167300 |
| H | -1.96844400 | 1.84724200  | 0.80289300  |
| C | 0.88677800  | 0.50725600  | 0.72427800  |
| H | 0.58968500  | 1.49229700  | 1.11373500  |
| C | 2.36785400  | 0.39917300  | 0.36981700  |
| H | 2.68052000  | 1.20982000  | -0.28820800 |
| O | 0.29766800  | -0.53644400 | 1.11774900  |

|    |             |             |             |
|----|-------------|-------------|-------------|
| C  | -3.08426700 | -0.71169800 | 1.24327900  |
| O  | -2.01667000 | -0.57804800 | 1.99077800  |
| O  | -4.20504300 | -0.76505400 | 1.71669100  |
| H  | -1.07349500 | -0.54248800 | 1.53749900  |
| C  | 2.79114900  | -0.95200500 | -0.17531000 |
| H  | 2.21561100  | -1.11772800 | -1.09588800 |
| C  | 4.27844200  | -1.05630000 | -0.50836100 |
| H  | 4.55963000  | -0.23165400 | -1.17556900 |
| H  | 2.49323100  | -1.73370900 | 0.53155800  |
| C  | 4.61451900  | -2.39294300 | -1.16665000 |
| H  | 5.68159300  | -2.46536300 | -1.39230900 |
| H  | 4.35225200  | -3.22705600 | -0.50784000 |
| H  | 4.06231500  | -2.51950400 | -2.10370200 |
| H  | 4.86735300  | -0.93691100 | 0.40672000  |
| Cl | 3.23446600  | 0.74968300  | 1.94199900  |
| C  | 0.55884300  | 2.52768900  | -1.42864300 |
| C  | -1.55007500 | 3.26494200  | -0.76989300 |
| H  | 1.61599600  | 2.67266200  | -1.19059000 |
| H  | 0.41721000  | 2.83535900  | -2.47715700 |
| H  | -1.79315100 | 3.40412500  | -1.83355800 |
| H  | -2.03361700 | 4.05630300  | -0.19576100 |
| O  | -0.15554400 | 3.40277100  | -0.57759000 |

(S)-TS2<sub>P</sub>-Cl-P

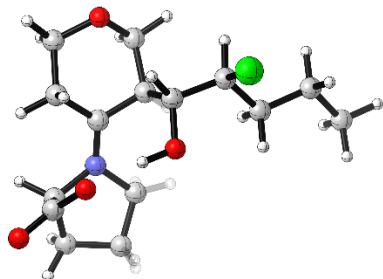

-----  
- Thermochemistry -  
-----

|                                              |                             |
|----------------------------------------------|-----------------------------|
| Zero-point correction=                       | 0.389466 (Hartree/Particle) |
| Thermal correction to Energy=                | 0.407306                    |
| Thermal correction to Enthalpy=              | 0.408171                    |
| Thermal correction to Gibbs Free Energy=     | 0.344533                    |
| Sum of electronic and zero-point Energies=   | -1401.144646                |
| Sum of electronic and thermal Energies=      | -1401.126806                |
| Sum of electronic and thermal Enthalpies=    | -1401.125941                |
| Sum of electronic and thermal Free Energies= | -1401.189579                |

Number of Imaginary Frequencies = 0

E (Single Point Energy) [IEFPCM(DCM)M06-2X/6-311++G(2d,2p)] = -1401.825541

|   |             |             |             |
|---|-------------|-------------|-------------|
| C | 0.32444300  | 0.79186100  | -0.93165500 |
| H | 0.62815300  | -0.00506000 | -1.61354500 |
| C | -1.15576600 | 0.73412400  | -0.68581600 |
| N | -1.80566500 | -0.37406100 | -0.79267000 |
| C | -3.18367900 | -0.57170400 | -0.28786600 |
| H | -3.84241900 | 0.20604900  | -0.67531700 |
| C | -1.22411100 | -1.67240200 | -1.24956200 |
| H | -0.22827600 | -1.79585400 | -0.82922100 |
| H | -1.17882200 | -1.64223000 | -2.34259900 |
| C | -2.22560200 | -2.70944100 | -0.74984600 |

|    |             |             |             |
|----|-------------|-------------|-------------|
| H  | -1.98523100 | -2.98887200 | 0.28056500  |
| H  | -2.20758000 | -3.60835700 | -1.36702700 |
| C  | -3.55826600 | -1.96169900 | -0.80249600 |
| H  | -3.92361100 | -1.89821600 | -1.83215500 |
| H  | -4.33636000 | -2.40217400 | -0.17912700 |
| C  | -1.79495900 | 1.98660100  | -0.16562900 |
| H  | -2.88129600 | 1.96201500  | -0.25375100 |
| H  | -1.55959400 | 2.03296200  | 0.90565400  |
| C  | 0.98879400  | 0.56886600  | 0.47765700  |
| H  | 0.81138700  | 1.47991800  | 1.06531200  |
| C  | 2.50309700  | 0.37660600  | 0.34298200  |
| H  | 2.93305200  | 1.18767800  | -0.24759800 |
| O  | 0.47033900  | -0.56443400 | 1.11790100  |
| C  | -3.20104100 | -0.49700800 | 1.28270000  |
| O  | -2.10968600 | -0.27730400 | 1.87177700  |
| O  | -4.32675100 | -0.66281300 | 1.77467900  |
| H  | -0.45295200 | -0.41537000 | 1.43759500  |
| C  | 2.91234300  | -0.97569000 | -0.22472600 |
| H  | 2.37724100  | -1.11463500 | -1.17444100 |
| C  | 4.41057400  | -1.11181100 | -0.49154600 |
| H  | 4.73906200  | -0.29175100 | -1.14265300 |
| H  | 2.56652600  | -1.76354700 | 0.45217400  |
| C  | 4.74847200  | -2.45366100 | -1.13811100 |
| H  | 5.82233800  | -2.54632900 | -1.32003100 |
| H  | 4.44344100  | -3.28348000 | -0.49247700 |
| H  | 4.23294100  | -2.56864500 | -2.09737900 |
| H  | 4.95954600  | -1.00696000 | 0.44995600  |
| Cl | 3.23517300  | 0.59852300  | 1.99274700  |

|   |             |            |             |
|---|-------------|------------|-------------|
| C | 0.69830800  | 2.14226500 | -1.56875800 |
| C | -1.23290300 | 3.23038100 | -0.86360700 |
| H | 1.78119200  | 2.26648500 | -1.60485900 |
| H | 0.32178200  | 2.17110800 | -2.60126800 |
| H | -1.58404200 | 3.28065900 | -1.90405300 |
| H | -1.56591300 | 4.12601900 | -0.33898600 |
| O | 0.18021500  | 3.22935000 | -0.83499500 |

(R)-TS2<sub>G</sub>-Cl-Pre

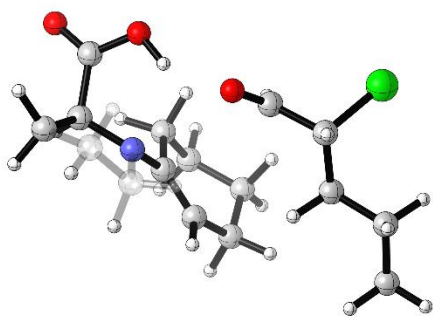

-----  
- Thermochemistry -  
-----

|                                              |                             |
|----------------------------------------------|-----------------------------|
| Zero-point correction=                       | 0.409337 (Hartree/Particle) |
| Thermal correction to Energy=                | 0.428876                    |
| Thermal correction to Enthalpy=              | 0.429741                    |
| Thermal correction to Gibbs Free Energy=     | 0.361551                    |
| Sum of electronic and zero-point Energies=   | -1365.213895                |
| Sum of electronic and thermal Energies=      | -1365.194356                |
| Sum of electronic and thermal Enthalpies=    | -1365.193491                |
| Sum of electronic and thermal Free Energies= | -1365.261681                |

Number of Imaginary Frequencies = 0

E (Single Point Energy) [IEFPCM(DCM)M06-2X/6-311++G(2d,2p)] = -1365.902257

|   |             |            |            |
|---|-------------|------------|------------|
| C | -0.03981000 | 1.76907700 | 0.89258900 |
| H | -0.20765700 | 1.46156200 | 1.92091300 |
| C | 0.99608500  | 1.24716500 | 0.20280500 |

|   |             |             |             |
|---|-------------|-------------|-------------|
| N | 1.80003600  | 0.22183000  | 0.71828500  |
| C | 3.21448000  | 0.11522900  | 0.36344200  |
| H | 3.69290500  | 1.08657800  | 0.20239900  |
| C | 1.55939500  | -0.28703800 | 2.06685000  |
| H | 0.55687900  | -0.72219200 | 2.12686900  |
| H | 1.63457800  | 0.51770600  | 2.81634500  |
| C | 2.67597700  | -1.30718300 | 2.24907600  |
| H | 2.41991200  | -2.23721400 | 1.72975000  |
| H | 2.86827900  | -1.53905300 | 3.29811400  |
| C | 3.85865300  | -0.61001700 | 1.57116700  |
| H | 4.28350900  | 0.14159300  | 2.24203300  |
| H | 4.66138900  | -1.28509000 | 1.26754200  |
| C | 1.29957100  | 1.66163400  | -1.22238500 |
| H | 2.37481500  | 1.82968500  | -1.34787100 |
| H | 1.04645800  | 0.82772500  | -1.89452200 |
| C | -0.97292500 | -1.33683700 | -0.56875700 |
| H | -0.82854300 | -0.60460400 | -1.38506100 |
| C | -2.39530900 | -1.51315400 | -0.08806000 |
| O | -0.04279000 | -1.95673100 | -0.10104100 |
| C | 3.43761700  | -0.69583400 | -0.91315500 |
| O | 2.47012800  | -1.53851600 | -1.26431600 |
| O | 4.46416300  | -0.61736900 | -1.55326200 |
| C | -2.94455400 | -0.21648100 | 0.49074300  |
| H | -2.26885900 | 0.07425900  | 1.30676600  |
| C | -4.37248500 | -0.32034000 | 1.02157700  |
| H | -5.04650600 | -0.60739900 | 0.20791800  |
| H | -4.42014700 | -1.11796600 | 1.77263300  |
| H | -2.44011700 | -2.33919500 | 0.62409200  |

|    |             |             |             |
|----|-------------|-------------|-------------|
| H  | -2.87898900 | 0.57004800  | -0.27277600 |
| C  | -4.83193800 | 1.00190300  | 1.63279700  |
| H  | -4.17928700 | 1.29937800  | 2.46019300  |
| H  | -5.85178700 | 0.92502600  | 2.01801500  |
| H  | -4.81349800 | 1.80260900  | 0.88608400  |
| H  | 1.69218100  | -1.46008700 | -0.66668400 |
| C  | 0.54033900  | 2.92145000  | -1.64266700 |
| C  | -0.99479100 | 2.78843600  | 0.32203600  |
| H  | 1.00830500  | 3.79895400  | -1.17842000 |
| H  | 0.62079700  | 3.04880100  | -2.72620600 |
| H  | -2.01727700 | 2.55857700  | 0.64711600  |
| H  | -0.76932700 | 3.78228900  | 0.73537800  |
| C  | -0.91959400 | 2.84753700  | -1.20265100 |
| H  | -1.48367800 | 3.70616600  | -1.57981400 |
| H  | -1.37959900 | 1.94563200  | -1.63220800 |
| Cl | -3.33360400 | -2.02993900 | -1.54765100 |

(R)-TS2<sub>G</sub>-Cl

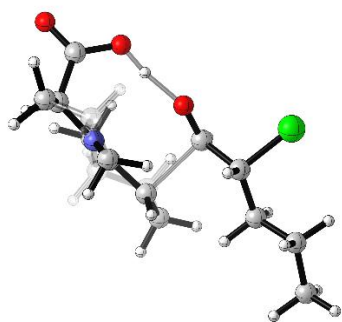

-----  
 - Thermochemistry -  
 -----

|                                          |                             |
|------------------------------------------|-----------------------------|
| Zero-point correction=                   | 0.381847 (Hartree/Particle) |
| Thermal correction to Energy=            | 0.399956                    |
| Thermal correction to Enthalpy=          | 0.400821                    |
| Thermal correction to Gibbs Free Energy= | 0.337245                    |



|                                              |              |
|----------------------------------------------|--------------|
| Sum of electronic and zero-point Energies=   | -1724.084194 |
| Sum of electronic and thermal Energies=      | -1724.066085 |
| Sum of electronic and thermal Enthalpies=    | -1724.065220 |
| Sum of electronic and thermal Free Energies= | -1724.128796 |

Number of Imaginary Frequencies = 1

E (Single Point Energy) [IEFPCM(DCM)M06-2X/6-311++G(2d,2p)] = -1724.766523

|   |             |             |             |
|---|-------------|-------------|-------------|
| C | 0.30963300  | 0.91748400  | -0.88416900 |
| H | 0.73216900  | 0.24609600  | -1.62800000 |
| C | -1.06897400 | 0.80494900  | -0.66539500 |
| N | -1.69478400 | -0.34157400 | -0.94909500 |
| C | -3.06228100 | -0.68739000 | -0.53327800 |
| H | -3.79416700 | -0.07397300 | -1.06971400 |
| C | -1.11659000 | -1.37666600 | -1.83033900 |
| H | -0.35526700 | -1.93880000 | -1.28178800 |
| H | -0.65815300 | -0.89954000 | -2.70018100 |
| C | -2.31652600 | -2.24626400 | -2.19777400 |
| H | -2.02149500 | -3.26747400 | -2.44290500 |
| H | -2.84146600 | -1.81904000 | -3.05757100 |
| C | -3.19261300 | -2.16360100 | -0.95004700 |
| H | -4.23515700 | -2.43535100 | -1.11756300 |
| H | -2.78410000 | -2.80313100 | -0.15975700 |
| C | -1.87406900 | 1.85371700  | 0.07089500  |
| H | -2.90620500 | 1.82741400  | -0.29491700 |
| H | -1.90253900 | 1.59317900  | 1.13611300  |
| C | 0.83832700  | -0.33001800 | 0.81223000  |
| H | 0.95804000  | 0.57956000  | 1.42019900  |
| C | 2.14061100  | -0.99620000 | 0.35116200  |
| O | -0.10912100 | -1.13637600 | 1.04001800  |
| C | -3.37242000 | -0.55087400 | 0.96142600  |

|    |             |             |             |
|----|-------------|-------------|-------------|
| O  | -2.40704600 | -0.73198200 | 1.82821900  |
| O  | -4.52402600 | -0.34529600 | 1.29960400  |
| C  | 3.25298000  | -0.14749300 | -0.24033200 |
| H  | 2.87458700  | 0.28631900  | -1.17251900 |
| C  | 4.52582800  | -0.92695300 | -0.57635400 |
| H  | 4.98050800  | -1.30835400 | 0.34223700  |
| H  | 4.26081600  | -1.80064400 | -1.18534500 |
| H  | 1.88110300  | -1.82585800 | -0.31189200 |
| H  | 3.49087600  | 0.67955800  | 0.44113400  |
| C  | 5.53145300  | -0.05586600 | -1.32671000 |
| H  | 5.81017600  | 0.81851100  | -0.72954600 |
| H  | 6.44444800  | -0.61304700 | -1.55179900 |
| H  | 5.11374900  | 0.30356500  | -2.27277900 |
| H  | -1.43289100 | -0.86203100 | 1.45631400  |
| C  | -1.33824900 | 3.27219900  | -0.07091400 |
| C  | 1.03071400  | 2.24705200  | -0.79157000 |
| H  | -1.40463100 | 3.62228100  | -1.10549200 |
| H  | -1.92029600 | 3.95014200  | 0.55532000  |
| H  | 2.08156100  | 2.10272500  | -0.53922200 |
| H  | 1.00672500  | 2.76477700  | -1.75773900 |
| S  | 0.38515000  | 3.36980700  | 0.47893200  |
| Cl | 2.75984100  | -1.80164700 | 1.87602600  |

(R)-TS2<sub>G</sub>-Cl-P

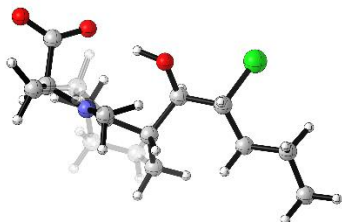

-----  
- Thermochemistry -  
-----

|                                              |                             |
|----------------------------------------------|-----------------------------|
| Zero-point correction=                       | 0.413776 (Hartree/Particle) |
| Thermal correction to Energy=                | 0.431619                    |
| Thermal correction to Enthalpy=              | 0.432484                    |
| Thermal correction to Gibbs Free Energy=     | 0.369157                    |
| Sum of electronic and zero-point Energies=   | -1365.227549                |
| Sum of electronic and thermal Energies=      | -1365.209706                |
| Sum of electronic and thermal Enthalpies=    | -1365.208841                |
| Sum of electronic and thermal Free Energies= | -1365.272168                |

Number of Imaginary Frequencies = 0

E (Single Point Energy) [IEFPCM<sub>(DCM)</sub>M06-2X/6-311++G(2d,2p)] = -1365.918402

|   |             |             |            |
|---|-------------|-------------|------------|
| C | -0.42826200 | 0.78308600  | 0.55196000 |
| H | -0.61517200 | 0.22567200  | 1.47451500 |
| C | 1.06180600  | 0.89722400  | 0.33872000 |
| N | 1.86676800  | 0.03941200  | 0.86896300 |
| C | 3.31069900  | -0.05899100 | 0.54981600 |
| H | 3.78097500  | 0.92014000  | 0.64868800 |
| C | 1.44839200  | -1.10342300 | 1.73531200 |
| H | 0.55751800  | -1.56636500 | 1.31583800 |
| H | 1.23921200  | -0.70525200 | 2.73279600 |
| C | 2.66417100  | -2.02603400 | 1.73260600 |
| H | 2.61435900  | -2.70149100 | 0.87297100 |

|   |             |             |             |
|---|-------------|-------------|-------------|
| H | 2.71019700  | -2.62544300 | 2.64254000  |
| C | 3.83654000  | -1.05785200 | 1.57910400  |
| H | 4.04471100  | -0.55157700 | 2.52696700  |
| H | 4.75239200  | -1.52612200 | 1.21928200  |
| C | 1.55006200  | 1.95000000  | -0.61309900 |
| H | 2.63648200  | 2.00989400  | -0.62695000 |
| H | 1.25007900  | 1.60453500  | -1.61340600 |
| C | -0.98062700 | -0.06670200 | -0.65385100 |
| H | -1.15548000 | 0.61467800  | -1.49944600 |
| C | -2.29359000 | -0.79331500 | -0.31147800 |
| O | -0.10381900 | -1.10950100 | -1.00718900 |
| C | 3.51629400  | -0.55633700 | -0.92729900 |
| O | 2.49241100  | -0.69056500 | -1.64646800 |
| O | 4.70483900  | -0.74878100 | -1.22756600 |
| C | -3.39976900 | -0.02777900 | 0.39765700  |
| H | -2.98589000 | 0.34329100  | 1.34361500  |
| C | -4.62690300 | -0.87887500 | 0.72844200  |
| H | -5.10991200 | -1.20543100 | -0.19706000 |
| H | -4.30288600 | -1.78637900 | 1.25363900  |
| H | -2.01956000 | -1.67519600 | 0.27674700  |
| H | -3.69993600 | 0.84300400  | -0.19875400 |
| C | -5.62665900 | -0.10916000 | 1.58924400  |
| H | -5.17783300 | 0.19130700  | 2.54166700  |
| H | -6.50765700 | -0.71752600 | 1.80937400  |
| H | -5.96429900 | 0.79765600  | 1.07683500  |
| H | 0.78803300  | -0.82066100 | -1.31333500 |
| C | 0.91508700  | 3.31882900  | -0.34401600 |
| C | -1.06041700 | 2.18846800  | 0.69557900  |

|    |             |             |             |
|----|-------------|-------------|-------------|
| H  | 1.25550800  | 3.70278900  | 0.62507400  |
| H  | 1.26397900  | 4.01618400  | -1.10969900 |
| H  | -2.14609800 | 2.10686100  | 0.68037700  |
| H  | -0.79275600 | 2.56903800  | 1.68885800  |
| C  | -0.60253000 | 3.19958000  | -0.35399900 |
| H  | -1.06503600 | 4.16731900  | -0.13944900 |
| H  | -0.94180400 | 2.90216600  | -1.35410000 |
| Cl | -2.93704300 | -1.46885400 | -1.87522000 |

(S)-TS2<sub>G</sub>-Cl-Pre

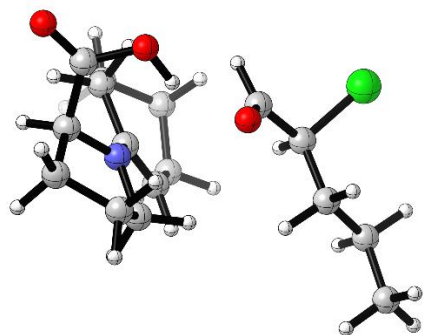

-----  
 - Thermochemistry -  
 -----

|                                              |                             |
|----------------------------------------------|-----------------------------|
| Zero-point correction=                       | 0.409261 (Hartree/Particle) |
| Thermal correction to Energy=                | 0.428770                    |
| Thermal correction to Enthalpy=              | 0.429635                    |
| Thermal correction to Gibbs Free Energy=     | 0.361695                    |
| Sum of electronic and zero-point Energies=   | -1365.215140                |
| Sum of electronic and thermal Energies=      | -1365.195630                |
| Sum of electronic and thermal Enthalpies=    | -1365.194765                |
| Sum of electronic and thermal Free Energies= | -1365.262706                |

Number of Imaginary Frequencies = 0

E (Single Point Energy) [IEFPCM(DCM)M06-2X/6-311++G(2d,2p)] = -1365.903542

|   |            |            |             |
|---|------------|------------|-------------|
| C | 0.05237000 | 0.97010300 | -1.63577100 |
| H | 0.42964500 | 0.11032800 | -2.18258300 |

|   |             |             |             |
|---|-------------|-------------|-------------|
| C | -1.07187900 | 0.84898500  | -0.89288200 |
| N | -1.69974700 | -0.38047800 | -0.69187100 |
| C | -3.11052600 | -0.49027100 | -0.33219900 |
| H | -3.73533700 | 0.27834600  | -0.79605400 |
| C | -1.23261200 | -1.57474500 | -1.39529700 |
| H | -0.19377300 | -1.78556100 | -1.12567600 |
| H | -1.28874400 | -1.43454500 | -2.48670700 |
| C | -2.19911500 | -2.65387600 | -0.92208400 |
| H | -1.89674900 | -3.01784700 | 0.06603100  |
| H | -2.24311100 | -3.50567300 | -1.60291800 |
| C | -3.52419300 | -1.89243600 | -0.84033500 |
| H | -3.95652600 | -1.78497600 | -1.83888300 |
| H | -4.27020900 | -2.36144900 | -0.19567500 |
| C | -1.66536200 | 2.02561900  | -0.14444000 |
| H | -2.74979000 | 2.05666600  | -0.29041200 |
| H | -1.51250300 | 1.87399200  | 0.93482000  |
| C | 0.45413500  | 3.27130900  | -0.70105300 |
| C | 0.95957400  | -0.06020800 | 1.21981700  |
| H | 0.52403700  | 0.85409400  | 1.66086900  |
| C | 2.36011300  | 0.08756600  | 0.66036200  |
| H | 2.38361800  | 0.96257600  | 0.00483500  |
| O | 0.35908500  | -1.11375700 | 1.23711400  |
| C | -3.34632200 | -0.38336900 | 1.17588500  |
| O | -2.31637300 | -0.66010800 | 1.97260400  |
| O | -4.43281200 | -0.10433800 | 1.63447100  |
| H | -1.49441000 | -0.83823400 | 1.46310400  |
| C | 2.88597600  | -1.15023400 | -0.03531100 |
| H | 2.14242900  | -1.41478100 | -0.79931500 |

|    |             |             |             |
|----|-------------|-------------|-------------|
| C  | 4.24714900  | -0.94957200 | -0.69729600 |
| H  | 4.18794200  | -0.10114500 | -1.39114100 |
| H  | 2.91643700  | -1.98246100 | 0.67694000  |
| C  | 4.69940500  | -2.20120600 | -1.44639000 |
| H  | 5.67516300  | -2.05014900 | -1.91507500 |
| H  | 4.78102600  | -3.05378400 | -0.76463700 |
| H  | 3.98471200  | -2.46719500 | -2.23192000 |
| H  | 4.98927600  | -0.68503800 | 0.06381200  |
| Cl | 3.37394100  | 0.55429200  | 2.09388900  |
| C  | 0.81529100  | 2.26308100  | -1.79048400 |
| C  | -1.06415400 | 3.36500900  | -0.57576900 |
| H  | 1.89451100  | 2.06046300  | -1.78549300 |
| H  | 0.60853300  | 2.70478300  | -2.77605400 |
| H  | -1.48294700 | 3.65255400  | -1.54844100 |
| H  | -1.35440700 | 4.13852200  | 0.14110600  |
| H  | 0.87846800  | 2.95149800  | 0.26206400  |
| H  | 0.88563800  | 4.25048500  | -0.92964000 |

(S)-TS2<sub>G</sub>-Cl

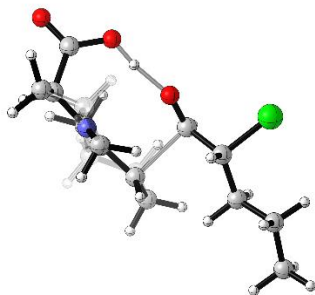

-----  
 - Thermochemistry -  
 -----

Zero-point correction=  
 Thermal correction to Energy=  
 Thermal correction to Enthalpy=

0.409224 (Hartree/Particle)  
 0.427192  
 0.428057

|                                              |              |
|----------------------------------------------|--------------|
| Thermal correction to Gibbs Free Energy=     | 0.364656     |
| Sum of electronic and zero-point Energies=   | -1365.206916 |
| Sum of electronic and thermal Energies=      | -1365.188948 |
| Sum of electronic and thermal Enthalpies=    | -1365.188083 |
| Sum of electronic and thermal Free Energies= | -1365.251485 |

Number of Imaginary Frequencies = 1

E (Single Point Energy) [IEFPCM(DCM)M06-2X/6-311++G(2d,2p)] = -1365.893626

|   |             |             |             |
|---|-------------|-------------|-------------|
| C | 0.14526000  | 1.09648300  | -1.21944200 |
| H | 0.67265100  | 0.35042900  | -1.80779400 |
| C | -1.16406300 | 0.80656800  | -0.84168300 |
| N | -1.61902500 | -0.45642300 | -0.81262600 |
| C | -2.93278200 | -0.85481800 | -0.29910500 |
| H | -3.73017900 | -0.23975700 | -0.72123900 |
| C | -0.89742600 | -1.59586200 | -1.41048000 |
| H | 0.14841500  | -1.58079200 | -1.11196800 |
| H | -0.96859400 | -1.53312800 | -2.50448100 |
| C | -1.63557800 | -2.80826900 | -0.85530900 |
| H | -1.24740100 | -3.04688400 | 0.14056300  |
| H | -1.52329600 | -3.68746100 | -1.49147000 |
| C | -3.08035000 | -2.31643500 | -0.76627700 |
| H | -3.54486200 | -2.32514300 | -1.75639900 |
| H | -3.70819800 | -2.89482500 | -0.08700800 |
| C | -2.04454600 | 1.88426900  | -0.25011900 |
| H | -3.09446000 | 1.67165900  | -0.46289200 |
| H | -1.93690600 | 1.84519600  | 0.84514100  |
| C | -0.19205100 | 3.54277500  | -0.61084100 |
| C | 0.87600500  | 0.43927200  | 0.75861000  |
| H | 0.55956200  | 1.39377200  | 1.20298700  |
| C | 2.35879300  | 0.37992400  | 0.40862300  |



|    |             |             |             |
|----|-------------|-------------|-------------|
| H  | 2.65512300  | 1.22761200  | -0.20834700 |
| O  | 0.29933900  | -0.63026300 | 1.09270300  |
| C  | -3.08409600 | -0.74900800 | 1.22784200  |
| O  | -2.01423000 | -0.65945000 | 1.98016900  |
| O  | -4.20644700 | -0.78119300 | 1.70007000  |
| H  | -1.07514300 | -0.63364000 | 1.52179900  |
| C  | 2.81532700  | -0.93639500 | -0.19189900 |
| H  | 2.23489600  | -1.08567600 | -1.11207000 |
| C  | 4.30162900  | -0.98144700 | -0.54208300 |
| H  | 4.54696100  | -0.13013000 | -1.18975200 |
| H  | 2.54884300  | -1.75264300 | 0.48806600  |
| C  | 4.67626000  | -2.28767300 | -1.23937800 |
| H  | 5.74236600  | -2.31644700 | -1.47912500 |
| H  | 4.45153700  | -3.14747400 | -0.59998800 |
| H  | 4.11725800  | -2.40916100 | -2.17304600 |
| H  | 4.89608900  | -0.86620000 | 0.37006200  |
| Cl | 3.21211800  | 0.67755200  | 2.00151100  |
| C  | 0.59511500  | 2.52791100  | -1.43942500 |
| C  | -1.68705600 | 3.28307200  | -0.75431800 |
| H  | 1.66597100  | 2.62651700  | -1.23065200 |
| H  | 0.48297700  | 2.77255200  | -2.50486800 |
| H  | -1.97385900 | 3.37193000  | -1.80956000 |
| H  | -2.27060900 | 4.02144100  | -0.19755100 |
| H  | 0.08946300  | 3.47299200  | 0.44768700  |
| H  | 0.05661500  | 4.55689600  | -0.93723900 |

(S)-TS2<sub>G</sub>-Cl-P

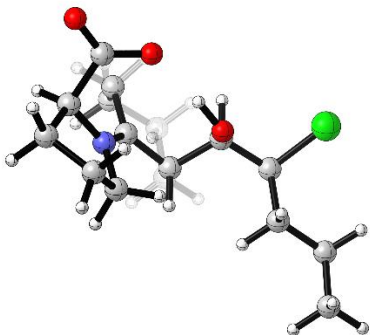

-----  
- Thermochemistry -  
-----

|                                              |                             |
|----------------------------------------------|-----------------------------|
| Zero-point correction=                       | 0.413637 (Hartree/Particle) |
| Thermal correction to Energy=                | 0.431676                    |
| Thermal correction to Enthalpy=              | 0.432541                    |
| Thermal correction to Gibbs Free Energy=     | 0.368381                    |
| Sum of electronic and zero-point Energies=   | -1365.234013                |
| Sum of electronic and thermal Energies=      | -1365.215975                |
| Sum of electronic and thermal Enthalpies=    | -1365.215110                |
| Sum of electronic and thermal Free Energies= | -1365.279269                |

Number of Imaginary Frequencies = 0

E (Single Point Energy) [IEFPCM(DCM)M06-2X/6-311++G(2d,2p)] = -1365.924651

|   |             |             |             |
|---|-------------|-------------|-------------|
| C | 0.34700600  | 0.72331500  | -0.88219400 |
| H | 0.58558500  | -0.11246900 | -1.54112600 |
| C | -1.13672900 | 0.76342700  | -0.63658600 |
| N | -1.86200400 | -0.28923200 | -0.81569500 |
| C | -3.24627400 | -0.42931200 | -0.31017400 |
| H | -3.85215300 | 0.42266200  | -0.61868100 |
| C | -1.37505500 | -1.59396900 | -1.36203700 |
| H | -0.39943800 | -1.82720900 | -0.94169800 |
| H | -1.30753000 | -1.48661700 | -2.44891600 |

|   |             |             |             |
|---|-------------|-------------|-------------|
| C | -2.45826000 | -2.58784100 | -0.95188600 |
| H | -2.24573100 | -2.97406100 | 0.04971900  |
| H | -2.50767400 | -3.42904800 | -1.64432200 |
| C | -3.72842800 | -1.73788300 | -0.93497500 |
| H | -4.08698800 | -1.56010400 | -1.95368900 |
| H | -4.53898200 | -2.16705900 | -0.34593200 |
| C | -1.69727500 | 2.02153600  | -0.03834200 |
| H | -2.78625000 | 2.01540100  | -0.03841500 |
| H | -1.39064400 | 2.01755400  | 1.01671100  |
| C | 0.36414800  | 3.28020600  | -0.80762000 |
| C | 0.96673800  | 0.41211100  | 0.52849800  |
| H | 0.73411600  | 1.24583300  | 1.20446000  |
| C | 2.49196700  | 0.29914900  | 0.45503600  |
| H | 2.91066900  | 1.22554000  | 0.05697300  |
| O | 0.45371100  | -0.79191200 | 1.03439700  |
| C | -3.23393000 | -0.49179200 | 1.26000700  |
| O | -2.11854800 | -0.41326700 | 1.84046800  |
| O | -4.36113100 | -0.61158300 | 1.76382400  |
| H | -0.46345500 | -0.65958100 | 1.37538900  |
| C | 2.99571700  | -0.90125800 | -0.33262400 |
| H | 2.56210400  | -0.83717800 | -1.34012900 |
| C | 4.51604000  | -0.96994500 | -0.46910100 |
| H | 4.88450300  | -0.02179700 | -0.88147100 |
| H | 2.60595700  | -1.81642900 | 0.12635800  |
| C | 4.95045800  | -2.12830200 | -1.36485100 |
| H | 6.03922100  | -2.17599800 | -1.44996500 |
| H | 4.60245800  | -3.08404800 | -0.95976000 |
| H | 4.53786200  | -2.02174400 | -2.37353500 |

|    |             |             |             |
|----|-------------|-------------|-------------|
| H  | 4.96768900  | -1.08002900 | 0.52190900  |
| Cl | 3.11740600  | 0.23623500  | 2.16162100  |
| C  | 0.83915100  | 2.02612800  | -1.53976600 |
| C  | -1.16044500 | 3.28442500  | -0.73095000 |
| H  | 1.92857400  | 2.00124200  | -1.62797000 |
| H  | 0.45238200  | 2.04921600  | -2.56571300 |
| H  | -1.57645300 | 3.34685600  | -1.74369600 |
| H  | -1.52419000 | 4.15527600  | -0.17997400 |
| H  | 0.79074400  | 3.32782100  | 0.20203300  |
| H  | 0.71453300  | 4.16874300  | -1.34037300 |

(R)-TS<sub>2</sub><sub>0</sub>-Cl-Pre

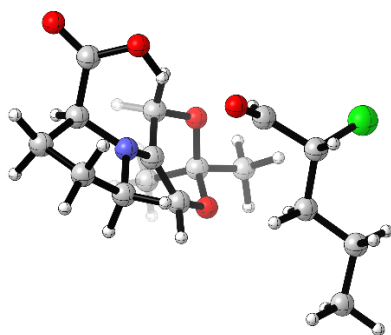

-----  
 - Thermochemistry -  
 -----

|                                              |                             |
|----------------------------------------------|-----------------------------|
| Zero-point correction=                       | 0.416671 (Hartree/Particle) |
| Thermal correction to Energy=                | 0.438339                    |
| Thermal correction to Enthalpy=              | 0.439204                    |
| Thermal correction to Gibbs Free Energy=     | 0.365492                    |
| Sum of electronic and zero-point Energies=   | -1515.593203                |
| Sum of electronic and thermal Energies=      | -1515.571536                |
| Sum of electronic and thermal Enthalpies=    | -1515.570671                |
| Sum of electronic and thermal Free Energies= | -1515.644382                |

Number of Imaginary Frequencies = 0

E (Single Point Energy) [IEFPCM<sub>(DCM)</sub>M06-2X/6-311++G(2d,2p)] = -1516.336462

|   |             |             |             |
|---|-------------|-------------|-------------|
| C | -0.09864200 | 0.87494200  | 1.29663200  |
| H | -0.30189600 | 0.26091000  | 2.16499600  |
| C | 0.96349300  | 0.72154000  | 0.48844600  |
| N | 1.91222100  | -0.29654400 | 0.64097400  |
| C | 3.31194700  | -0.04735700 | 0.28690900  |
| H | 3.57718800  | 1.01497900  | 0.31430500  |
| C | 1.81667600  | -1.17651000 | 1.80666100  |
| H | 0.93624000  | -1.82135000 | 1.71571300  |
| H | 1.72628500  | -0.58939300 | 2.73521400  |
| C | 3.13966000  | -1.93337500 | 1.77756200  |
| H | 3.09740100  | -2.74093000 | 1.03884800  |
| H | 3.39460200  | -2.36500500 | 2.74674900  |
| C | 4.12004600  | -0.84261200 | 1.33670100  |
| H | 4.34749900  | -0.18259400 | 2.17841000  |
| H | 5.06048500  | -1.21949500 | 0.93119400  |
| C | 1.07565900  | 1.59227500  | -0.73878900 |
| H | 1.86455800  | 2.35169900  | -0.63805500 |
| H | 1.31243900  | 0.98210800  | -1.61791700 |
| O | -1.09479700 | 1.79524400  | 1.07070100  |
| O | -0.17363900 | 2.20213900  | -1.02065500 |
| C | -0.79098000 | 2.80181400  | 0.10390300  |
| C | -2.11893100 | 3.34220200  | -0.37869800 |
| H | -2.68159500 | 2.53895400  | -0.86085800 |
| H | -1.95223200 | 4.14925500  | -1.09510900 |
| C | 0.09127300  | 3.87092100  | 0.73956900  |
| H | -0.48266200 | 4.40324900  | 1.50087200  |
| H | 0.41468000  | 4.58192000  | -0.02504100 |
| H | 0.97040400  | 3.43389500  | 1.21894000  |

|    |             |             |             |
|----|-------------|-------------|-------------|
| C  | -0.92989500 | -1.15476600 | -1.20622500 |
| H  | -0.84814700 | -0.09463600 | -1.50872300 |
| C  | -2.32101900 | -1.64287100 | -0.86545400 |
| O  | 0.03734000  | -1.88140700 | -1.12407000 |
| C  | 3.64571600  | -0.54598000 | -1.12361900 |
| O  | 2.72731500  | -1.28724700 | -1.73489800 |
| O  | 4.70979500  | -0.30029900 | -1.64885000 |
| H  | -2.69037800 | 3.72601000  | 0.46884200  |
| C  | -2.68519700 | -1.24808100 | 0.56428000  |
| H  | -1.90753300 | -1.67912400 | 1.21008200  |
| C  | -4.05485300 | -1.75232400 | 1.01416100  |
| H  | -4.83185000 | -1.31468500 | 0.37890100  |
| H  | -4.10301200 | -2.83922900 | 0.87466200  |
| H  | -2.62231700 | -0.15683600 | 0.66457300  |
| C  | -4.32358400 | -1.40055800 | 2.47606600  |
| H  | -3.57463700 | -1.85483200 | 3.13274500  |
| H  | -4.29019600 | -0.31680400 | 2.62728900  |
| H  | -5.30821500 | -1.75469700 | 2.79186100  |
| H  | 1.91190100  | -1.36373900 | -1.18858000 |
| H  | -2.37187800 | -2.72430000 | -1.00767300 |
| Cl | -3.45464700 | -0.90191300 | -2.06150100 |

(R)-TS2<sub>0</sub>-Cl

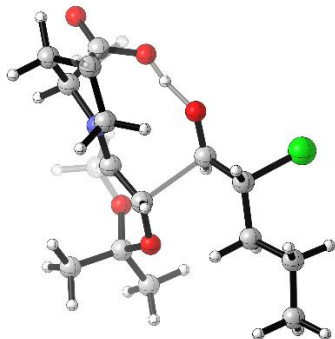

-----  
- Thermochemistry -  
-----

|                                              |                             |
|----------------------------------------------|-----------------------------|
| Zero-point correction=                       | 0.415722 (Hartree/Particle) |
| Thermal correction to Energy=                | 0.435649                    |
| Thermal correction to Enthalpy=              | 0.436514                    |
| Thermal correction to Gibbs Free Energy=     | 0.369078                    |
| Sum of electronic and zero-point Energies=   | -1515.578496                |
| Sum of electronic and thermal Energies=      | -1515.558569                |
| Sum of electronic and thermal Enthalpies=    | -1515.557704                |
| Sum of electronic and thermal Free Energies= | -1515.625140                |

Number of Imaginary Frequencies = 1

E (Single Point Energy) [IEFPCM<sub>(DCM)</sub>M06-2X/6-311++G(2d,2p)] = -1516.319381

|   |             |             |            |
|---|-------------|-------------|------------|
| C | -0.38108800 | 0.72799200  | 0.74598100 |
| H | -0.65594100 | 0.23631800  | 1.67469400 |
| C | 0.95904600  | 0.84558900  | 0.38393800 |
| N | 1.88182000  | -0.00350800 | 0.82618300 |
| C | 3.27547200  | -0.01025900 | 0.37040700 |
| H | 3.66339100  | 1.00959100  | 0.29358500 |
| C | 1.65558500  | -0.93250700 | 1.95102700 |
| H | 0.75547000  | -1.52231600 | 1.77731200 |
| H | 1.54325300  | -0.34887200 | 2.87391300 |

|   |             |             |             |
|---|-------------|-------------|-------------|
| C | 2.92479500  | -1.77978400 | 1.95598400  |
| H | 2.81790600  | -2.60683200 | 1.24633200  |
| H | 3.13624200  | -2.19473100 | 2.94216700  |
| C | 3.99733300  | -0.79823700 | 1.47674600  |
| H | 4.27217500  | -0.11232500 | 2.28301200  |
| H | 4.90241700  | -1.27509100 | 1.09987900  |
| C | 1.33540400  | 1.82887900  | -0.69695600 |
| H | 2.04880200  | 2.56410300  | -0.29631200 |
| H | 1.81415200  | 1.31117900  | -1.53445100 |
| O | -1.29348100 | 1.69830300  | 0.36824000  |
| O | 0.19099100  | 2.45526200  | -1.23066400 |
| C | -0.75386000 | 2.86175100  | -0.25710700 |
| C | -1.89509900 | 3.50672400  | -1.01121900 |
| H | -2.25335000 | 2.81909700  | -1.78044700 |
| H | -1.55288800 | 4.43126600  | -1.48066300 |
| C | -0.14240000 | 3.78452900  | 0.79280000  |
| H | -0.94088900 | 4.19068800  | 1.41676100  |
| H | 0.37785600  | 4.60933600  | 0.29912900  |
| H | 0.56143800  | 3.26031100  | 1.44423600  |
| C | -0.67784800 | -0.88232600 | -0.60364300 |
| H | -0.84338700 | -0.16083300 | -1.42006700 |
| C | -1.95618600 | -1.49424800 | -0.02418500 |
| O | 0.33481700  | -1.64821700 | -0.61457900 |
| C | 3.50507400  | -0.65438800 | -1.01377900 |
| O | 2.51071300  | -1.22643200 | -1.63673600 |
| O | 4.62842000  | -0.59122500 | -1.48175700 |
| H | -2.70971600 | 3.73370300  | -0.32068100 |
| C | -3.14288400 | -0.58244800 | 0.24086300  |



|    |             |             |             |
|----|-------------|-------------|-------------|
| H  | -2.84875100 | 0.12948700  | 1.01774400  |
| C  | -4.40186500 | -1.31181600 | 0.71126300  |
| H  | -4.77645100 | -1.96208200 | -0.08454700 |
| H  | -4.14727700 | -1.96299600 | 1.55757600  |
| H  | -3.35706900 | 0.01022400  | -0.65738200 |
| C  | -5.49263400 | -0.32610900 | 1.12641400  |
| H  | -5.15752200 | 0.30623500  | 1.95499300  |
| H  | -5.76031500 | 0.33045600  | 0.29195300  |
| H  | -6.39785000 | -0.84919300 | 1.44580800  |
| H  | 1.56697500  | -1.32910600 | -1.15019900 |
| H  | -1.68927100 | -2.07878100 | 0.86094800  |
| Cl | -2.43334800 | -2.74799200 | -1.27446000 |

(R)-TS2<sub>O</sub>-Cl-P

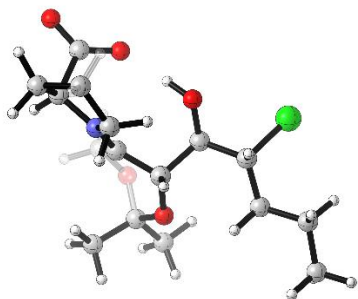

-----  
 - Thermochemistry -  
 -----

|                                              |                             |
|----------------------------------------------|-----------------------------|
| Zero-point correction=                       | 0.419797 (Hartree/Particle) |
| Thermal correction to Energy=                | 0.439872                    |
| Thermal correction to Enthalpy=              | 0.440737                    |
| Thermal correction to Gibbs Free Energy=     | 0.372289                    |
| Sum of electronic and zero-point Energies=   | -1515.602231                |
| Sum of electronic and thermal Energies=      | -1515.582156                |
| Sum of electronic and thermal Enthalpies=    | -1515.581291                |
| Sum of electronic and thermal Free Energies= | -1515.649740                |

Number of Imaginary Frequencies = 0

E (Single Point Energy) [IEFPCM(DCM)M06-2X/6-311++G(2d,2p)] = -1516.346706

|   |             |             |             |
|---|-------------|-------------|-------------|
| C | -0.35892000 | 0.39160300  | 0.58381700  |
| H | -0.42741400 | 0.01744300  | 1.61086700  |
| C | 1.07215400  | 0.69592900  | 0.22688700  |
| N | 2.05737200  | 0.09097300  | 0.78319000  |
| C | 3.43924200  | 0.15236800  | 0.26618200  |
| H | 3.69616100  | 1.18270300  | 0.00877300  |
| C | 1.96192300  | -0.86940300 | 1.92529000  |
| H | 1.16279300  | -1.58211100 | 1.73079300  |
| H | 1.74327400  | -0.28092700 | 2.82135600  |
| C | 3.35243000  | -1.50112000 | 1.97748600  |
| H | 3.38370100  | -2.38468700 | 1.33298600  |
| H | 3.61030600  | -1.80421900 | 2.99262000  |
| C | 4.26659100  | -0.40693400 | 1.42035200  |
| H | 4.44575000  | 0.36903400  | 2.17084200  |
| H | 5.22338500  | -0.77951700 | 1.05605100  |
| C | 1.28983300  | 1.65099600  | -0.91596200 |
| H | 1.99070900  | 2.44328100  | -0.61877500 |
| H | 1.72013400  | 1.10051600  | -1.75861800 |
| O | -1.20069900 | 1.52041400  | 0.49305700  |
| O | 0.05687500  | 2.17467800  | -1.34546800 |
| C | -0.76858300 | 2.63730700  | -0.29389100 |
| C | -2.00790200 | 3.21265500  | -0.94334600 |
| H | -2.42544600 | 2.47759200  | -1.63495600 |
| H | -1.75358500 | 4.12343900  | -1.48962100 |
| C | -0.05843800 | 3.63820800  | 0.61266000  |
| H | -0.78852600 | 4.06221700  | 1.30454600  |

|    |             |             |             |
|----|-------------|-------------|-------------|
| H  | 0.37720900  | 4.44392300  | 0.01607400  |
| H  | 0.72866000  | 3.17011200  | 1.21103600  |
| C  | -0.81285600 | -0.74082200 | -0.41227300 |
| H  | -0.94270500 | -0.26546200 | -1.39547000 |
| C  | -2.13453600 | -1.38001400 | 0.03153400  |
| O  | 0.13101400  | -1.77622000 | -0.43360200 |
| C  | 3.56685600  | -0.72161700 | -1.04418700 |
| O  | 2.50272600  | -1.16012000 | -1.55431700 |
| O  | 4.73189000  | -0.85399600 | -1.43875700 |
| H  | -2.74788500 | 3.44728400  | -0.17562900 |
| C  | -3.28897000 | -0.44923100 | 0.37112600  |
| H  | -2.95937400 | 0.19208500  | 1.19552300  |
| C  | -4.56597400 | -1.17290900 | 0.79783500  |
| H  | -4.95951800 | -1.75878200 | -0.03811100 |
| H  | -4.32659100 | -1.88583600 | 1.59756700  |
| H  | -3.49015400 | 0.21587600  | -0.47796000 |
| C  | -5.62893300 | -0.18862900 | 1.28250900  |
| H  | -5.27302800 | 0.38099300  | 2.14720300  |
| H  | -5.88462700 | 0.52633000  | 0.49347400  |
| H  | -6.54555000 | -0.70773800 | 1.57478000  |
| H  | 0.95205900  | -1.53129800 | -0.92529400 |
| H  | -1.91063800 | -2.03633400 | 0.87913700  |
| Cl | -2.63051000 | -2.51183000 | -1.30558500 |

(S)-TS2<sub>o</sub>-Cl-Pre

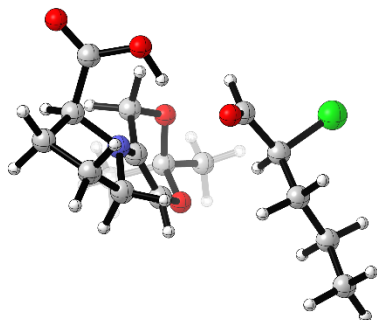

-----  
- Thermochemistry -  
-----

|                                              |                             |
|----------------------------------------------|-----------------------------|
| Zero-point correction=                       | 0.416848 (Hartree/Particle) |
| Thermal correction to Energy=                | 0.438380                    |
| Thermal correction to Enthalpy=              | 0.439245                    |
| Thermal correction to Gibbs Free Energy=     | 0.366524                    |
| Sum of electronic and zero-point Energies=   | -1515.594798                |
| Sum of electronic and thermal Energies=      | -1515.573266                |
| Sum of electronic and thermal Enthalpies=    | -1515.572401                |
| Sum of electronic and thermal Free Energies= | -1515.645123                |

Number of Imaginary Frequencies = 0

E (Single Point Energy) [IEFPCM<sub>(DCM)</sub>M06-2X/6-311++G(2d,2p)] = -1516.338534

|   |             |             |             |
|---|-------------|-------------|-------------|
| C | 0.14966400  | 0.78820100  | -1.35516700 |
| H | 0.39091100  | 0.07899600  | -2.13742500 |
| C | -0.93330400 | 0.70623900  | -0.56073200 |
| N | -1.85252200 | -0.34282800 | -0.62145500 |
| C | -3.24854800 | -0.12755800 | -0.23937900 |
| H | -3.55891900 | 0.91915400  | -0.32271400 |
| C | -1.74196200 | -1.31898800 | -1.70685200 |
| H | -0.84533700 | -1.93190500 | -1.56636900 |
| H | -1.67047100 | -0.80939800 | -2.68144800 |

|   |             |             |             |
|---|-------------|-------------|-------------|
| C | -3.04320300 | -2.10709000 | -1.59853800 |
| H | -2.96466800 | -2.86069500 | -0.80755200 |
| H | -3.30198700 | -2.61269500 | -2.53013200 |
| C | -4.04973300 | -1.01837800 | -1.21444000 |
| H | -4.31319100 | -0.42481900 | -2.09427200 |
| H | -4.96994800 | -1.39557900 | -0.76515600 |
| C | -1.10190300 | 1.72234400  | 0.54199200  |
| H | -1.88129500 | 2.46100100  | 0.30736600  |
| H | -1.38351600 | 1.23243500  | 1.48051800  |
| O | 1.12182700  | 1.75196500  | -1.21540400 |
| O | 0.13759000  | 2.36352500  | 0.79456700  |
| C | 0.77295200  | 2.85407600  | -0.37254200 |
| C | 2.07473700  | 3.47785500  | 0.07985000  |
| H | 2.66795400  | 3.76418300  | -0.79080200 |
| H | 1.86889200  | 4.36496200  | 0.68234100  |
| C | -0.11037900 | 3.82499400  | -1.14832700 |
| H | 0.48071100  | 4.29115000  | -1.93916100 |
| H | -0.48120600 | 4.60241600  | -0.47538000 |
| H | -0.95809400 | 3.31571400  | -1.61258600 |
| C | 0.80744200  | -0.89323400 | 1.29708100  |
| H | 0.49216600  | -0.11426200 | 2.01484500  |
| C | 2.18866900  | -0.70100300 | 0.70701400  |
| O | 0.08963100  | -1.83245200 | 1.02639300  |
| C | -3.52426600 | -0.54833300 | 1.20877900  |
| O | -2.58177900 | -1.25587000 | 1.82620100  |
| O | -4.56645500 | -0.27328300 | 1.76150200  |
| H | 2.63704300  | 2.75830600  | 0.68024700  |
| C | 2.61360100  | -1.79542000 | -0.25003200 |

|    |             |             |             |
|----|-------------|-------------|-------------|
| H  | 2.66863700  | -2.74921200 | 0.28772800  |
| C  | 3.92728200  | -1.49833900 | -0.96902600 |
| H  | 3.84104100  | -0.53443700 | -1.48679200 |
| H  | 4.73151500  | -1.39115500 | -0.23280900 |
| H  | 1.80471400  | -1.89676700 | -0.98595300 |
| C  | 4.28624900  | -2.59495500 | -1.96931000 |
| H  | 4.39405000  | -3.56085000 | -1.46543500 |
| H  | 3.50765100  | -2.69974700 | -2.73191000 |
| H  | 5.22826300  | -2.37355700 | -2.47758000 |
| H  | -1.79385600 | -1.38475200 | 1.25194400  |
| H  | 2.21523200  | 0.28567400  | 0.23109500  |
| Cl | 3.30300400  | -0.56399500 | 2.13348700  |

(S)-TS2<sub>o</sub>-Cl

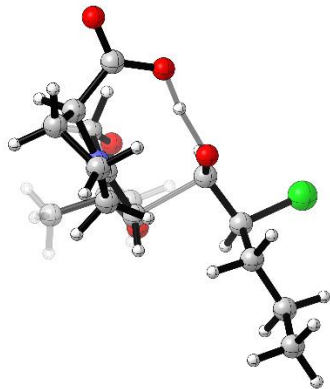

-----  
 - Thermochemistry -  
 -----

|                                              |                             |
|----------------------------------------------|-----------------------------|
| Zero-point correction=                       | 0.415745 (Hartree/Particle) |
| Thermal correction to Energy=                | 0.435649                    |
| Thermal correction to Enthalpy=              | 0.436514                    |
| Thermal correction to Gibbs Free Energy=     | 0.369297                    |
| Sum of electronic and zero-point Energies=   | -1515.584519                |
| Sum of electronic and thermal Energies=      | -1515.564615                |
| Sum of electronic and thermal Enthalpies=    | -1515.563750                |
| Sum of electronic and thermal Free Energies= | -1515.630967                |

Number of Imaginary Frequencies = 1

E (Single Point Energy) [IEFPCM(DCM)M06-2X/6-311++G(2d,2p)] = -1516.325570

|   |             |             |             |
|---|-------------|-------------|-------------|
| C | 0.26088900  | 0.82518300  | -0.89223600 |
| H | 0.71619200  | 0.20962600  | -1.66116800 |
| C | -1.07694100 | 0.65062100  | -0.54521700 |
| N | -1.71001300 | -0.50069700 | -0.75226100 |
| C | -3.05111500 | -0.79936600 | -0.24239700 |
| H | -3.71623600 | 0.05974800  | -0.36643800 |
| C | -1.19512600 | -1.56577100 | -1.63731900 |
| H | -0.17599100 | -1.83123900 | -1.35516900 |
| H | -1.21044200 | -1.20181200 | -2.67263100 |
| C | -2.18246200 | -2.70828300 | -1.41163400 |
| H | -1.87098700 | -3.29877600 | -0.54377700 |
| H | -2.24451500 | -3.37099900 | -2.27557900 |
| C | -3.49747000 | -1.98085400 | -1.11982500 |
| H | -3.93189900 | -1.59389000 | -2.04596700 |
| H | -4.24309200 | -2.59426000 | -0.61343500 |
| C | -1.75121700 | 1.72277100  | 0.27469000  |
| H | -2.60937200 | 2.12955000  | -0.27985500 |
| H | -2.12123800 | 1.30863700  | 1.21860300  |
| O | 0.87303200  | 2.05950500  | -0.77766400 |
| O | -0.83372300 | 2.73384600  | 0.62882900  |
| C | 0.01761200  | 3.14928300  | -0.42404600 |
| C | 0.91173000  | 4.22571800  | 0.14827500  |
| H | 1.66661100  | 4.50674800  | -0.58857800 |
| H | 0.31491700  | 5.10334800  | 0.40450300  |
| C | -0.76197100 | 3.61480000  | -1.64934000 |

|    |             |             |             |
|----|-------------|-------------|-------------|
| H  | -0.06783800 | 4.06229400  | -2.36329100 |
| H  | -1.49977400 | 4.36451700  | -1.35229900 |
| H  | -1.27561500 | 2.78998900  | -2.14968200 |
| C  | 0.85791400  | -0.17840000 | 0.83740300  |
| H  | 0.58766500  | 0.68338900  | 1.46784800  |
| C  | 2.34089700  | -0.22067000 | 0.48330500  |
| O  | 0.24888000  | -1.28599900 | 0.98091700  |
| C  | -3.10506100 | -1.16912400 | 1.25567700  |
| O  | -1.99725500 | -1.32438400 | 1.92637700  |
| O  | -4.20747300 | -1.30043800 | 1.75982100  |
| H  | 1.40464600  | 3.84620800  | 1.04592800  |
| C  | 2.74547400  | -1.43356800 | -0.33451700 |
| H  | 2.50061000  | -2.34013600 | 0.22893700  |
| C  | 4.21203100  | -1.43610800 | -0.76073800 |
| H  | 4.43452500  | -0.50599800 | -1.29873100 |
| H  | 4.85008500  | -1.44660900 | 0.12932400  |
| H  | 2.11423000  | -1.44655000 | -1.23397100 |
| C  | 4.54091700  | -2.63744300 | -1.64468300 |
| H  | 4.34053900  | -3.57505300 | -1.11621100 |
| H  | 3.93502300  | -2.63099200 | -2.55677700 |
| H  | 5.59348400  | -2.63586800 | -1.93963700 |
| H  | -1.03995400 | -1.26992300 | 1.43736300  |
| H  | 2.64930400  | 0.71746400  | 0.01935000  |
| Cl | 3.21205400  | -0.23220600 | 2.09156100  |



(S)-TS2<sub>o</sub>-Cl-P

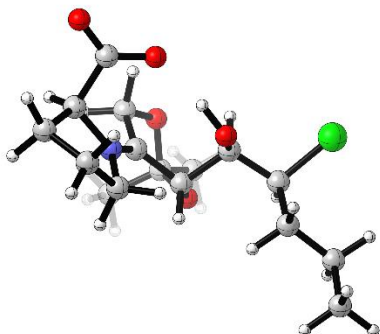

-----  
- Thermochemistry -  
-----

|                                              |                             |
|----------------------------------------------|-----------------------------|
| Zero-point correction=                       | 0.419829 (Hartree/Particle) |
| Thermal correction to Energy=                | 0.440024                    |
| Thermal correction to Enthalpy=              | 0.440889                    |
| Thermal correction to Gibbs Free Energy=     | 0.372020                    |
| Sum of electronic and zero-point Energies=   | -1515.606058                |
| Sum of electronic and thermal Energies=      | -1515.585863                |
| Sum of electronic and thermal Enthalpies=    | -1515.584998                |
| Sum of electronic and thermal Free Energies= | -1515.653866                |

Number of Imaginary Frequencies = 0

E (Single Point Energy) [IEFPCM(DCM)M06-2X/6-311++G(2d,2p)] = -1516.350766

|   |             |             |             |
|---|-------------|-------------|-------------|
| C | 0.34353600  | 0.55156400  | -0.63126600 |
| H | 0.55899100  | -0.04605800 | -1.52027600 |
| C | -1.13398700 | 0.61065300  | -0.37573900 |
| N | -1.92385500 | -0.32858600 | -0.75237300 |
| C | -3.29487000 | -0.48201100 | -0.22776600 |
| H | -3.80497100 | 0.48420300  | -0.21762400 |
| C | -1.56270700 | -1.48181900 | -1.63458400 |
| H | -0.61941800 | -1.91283400 | -1.30498400 |
| H | -1.47090700 | -1.08823000 | -2.65138200 |

|   |             |             |             |
|---|-------------|-------------|-------------|
| C | -2.75414000 | -2.42754800 | -1.48991600 |
| H | -2.58764200 | -3.10945300 | -0.65060900 |
| H | -2.89885400 | -3.02055900 | -2.39334800 |
| C | -3.92493900 | -1.48926200 | -1.18626900 |
| H | -4.26594400 | -0.98669700 | -2.09640700 |
| H | -4.77238800 | -1.98526000 | -0.71408600 |
| C | -1.61833100 | 1.74508700  | 0.48554700  |
| H | -2.46362100 | 2.25242000  | 0.00039400  |
| H | -1.95625100 | 1.34275900  | 1.44630600  |
| O | 0.95176600  | 1.81200400  | -0.80710800 |
| O | -0.55756600 | 2.63096800  | 0.75558900  |
| C | 0.22491600  | 2.96983600  | -0.37491500 |
| C | 1.25466200  | 3.96973000  | 0.10190800  |
| H | 1.96956900  | 4.16911500  | -0.69857300 |
| H | 0.76288300  | 4.90229600  | 0.38619400  |
| C | -0.61715300 | 3.49466100  | -1.53322800 |
| H | 0.05124000  | 3.86395200  | -2.31309600 |
| H | -1.25580700 | 4.31389400  | -1.19313400 |
| H | -1.24334700 | 2.71597600  | -1.97790500 |
| C | 0.93657700  | -0.15652300 | 0.64488300  |
| H | 0.71914600  | 0.50222600  | 1.49727600  |
| C | 2.45498600  | -0.26568000 | 0.49613100  |
| O | 0.38590100  | -1.42930100 | 0.81183500  |
| C | -3.23769900 | -1.02549200 | 1.25500500  |
| O | -2.10573100 | -1.09831100 | 1.80196400  |
| O | -4.34833500 | -1.30532400 | 1.72265600  |
| H | 1.78277100  | 3.55778000  | 0.96474600  |
| C | 2.90868500  | -1.34096300 | -0.48038100 |

|    |             |             |             |
|----|-------------|-------------|-------------|
| H  | 2.57650300  | -2.31816700 | -0.11440500 |
| C  | 4.41395500  | -1.34569600 | -0.74238100 |
| H  | 4.72552700  | -0.34827500 | -1.07731800 |
| H  | 4.94612300  | -1.54574100 | 0.19344400  |
| H  | 2.39065800  | -1.16569800 | -1.43355700 |
| C  | 4.80240100  | -2.38855700 | -1.78841500 |
| H  | 4.51358200  | -3.39278000 | -1.46171800 |
| H  | 4.30500200  | -2.19098400 | -2.74373600 |
| H  | 5.88125600  | -2.38982100 | -1.96470600 |
| H  | -0.50701500 | -1.35638800 | 1.22799300  |
| H  | 2.85115700  | 0.71283700  | 0.21787600  |
| Cl | 3.14677100  | -0.59815200 | 2.14518100  |

(R)-TS2<sub>T</sub>-Cl-Pre

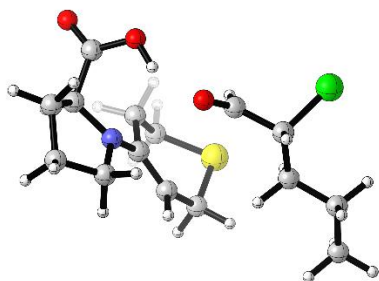

-----  
 - Thermochemistry -  
 -----

|                                              |                             |
|----------------------------------------------|-----------------------------|
| Zero-point correction=                       | 0.381924 (Hartree/Particle) |
| Thermal correction to Energy=                | 0.401833                    |
| Thermal correction to Enthalpy=              | 0.402698                    |
| Thermal correction to Gibbs Free Energy=     | 0.333340                    |
| Sum of electronic and zero-point Energies=   | -1724.096560                |
| Sum of electronic and thermal Energies=      | -1724.076651                |
| Sum of electronic and thermal Enthalpies=    | -1724.075786                |
| Sum of electronic and thermal Free Energies= | -1724.145143                |

Number of Imaginary Frequencies = 0

E (Single Point Energy) [IEFPCM(DCM)M06-2X/6-311++G(2d,2p)] = -1724.781246

|   |             |             |             |
|---|-------------|-------------|-------------|
| C | 0.01618300  | 1.42209700  | 1.14834400  |
| H | -0.16972900 | 0.93081700  | 2.09797400  |
| C | 1.10800000  | 1.07820100  | 0.42630200  |
| N | 1.97370200  | 0.06833600  | 0.84449100  |
| C | 3.28682800  | -0.16071000 | 0.25397300  |
| H | 3.93055200  | 0.72878800  | 0.27091700  |
| C | 1.90196600  | -0.44169900 | 2.21956500  |
| H | 1.15055600  | -1.23895300 | 2.28783000  |
| H | 1.61187300  | 0.36055300  | 2.90643700  |
| C | 3.31809900  | -0.93850500 | 2.52001600  |
| H | 3.32659000  | -1.79341600 | 3.19838500  |
| H | 3.90376500  | -0.13357700 | 2.97440300  |
| C | 3.88094500  | -1.27227900 | 1.14061100  |
| H | 4.97072200  | -1.28161000 | 1.09350400  |
| H | 3.50898200  | -2.24754300 | 0.80645400  |
| C | 1.43995200  | 1.69534200  | -0.91864200 |
| H | 2.50794400  | 1.94192900  | -0.95144000 |
| H | 1.26465300  | 0.95240600  | -1.70776900 |
| C | -0.90634500 | -1.41360700 | -0.49387900 |
| H | -0.75150300 | -0.60526000 | -1.23255700 |
| C | -2.33891400 | -1.67097000 | -0.08809700 |
| O | 0.02097000  | -2.05939600 | -0.05074300 |
| C | 3.24744400  | -0.65726500 | -1.18636400 |
| O | 2.23255100  | -1.45247100 | -1.51676700 |
| O | 4.12422800  | -0.39988200 | -1.98136600 |
| C | -2.96155500 | -0.44210300 | 0.55788600  |
| H | -2.34491400 | -0.20911400 | 1.43705600  |

|    |             |             |             |
|----|-------------|-------------|-------------|
| C  | -4.41432900 | -0.62557500 | 0.99049900  |
| H  | -5.03151700 | -0.85043600 | 0.11469100  |
| H  | -4.48460200 | -1.48988000 | 1.66193200  |
| H  | -2.38386800 | -2.55035600 | 0.55680500  |
| H  | -2.87117000 | 0.40442800  | -0.13583200 |
| C  | -4.94399100 | 0.62480800  | 1.68984100  |
| H  | -4.89818300 | 1.49205400  | 1.02275100  |
| H  | -5.98404100 | 0.49351800  | 1.99875800  |
| H  | -4.35310500 | 0.85521400  | 2.58251000  |
| H  | 1.58052400  | -1.56669500 | -0.78520900 |
| C  | 0.66417600  | 2.96359300  | -1.25096900 |
| C  | -0.99555100 | 2.47344900  | 0.77676500  |
| H  | 0.99373300  | 3.79865300  | -0.62477500 |
| H  | 0.82640600  | 3.23837100  | -2.29461500 |
| H  | -1.99140400 | 2.17690900  | 1.11807900  |
| H  | -0.77390800 | 3.43546900  | 1.25486700  |
| S  | -1.12413300 | 2.75086800  | -1.01525000 |
| Cl | -3.18868100 | -2.10877500 | -1.62604100 |

(*R*)-TS<sub>2</sub><sub>T</sub>-Cl

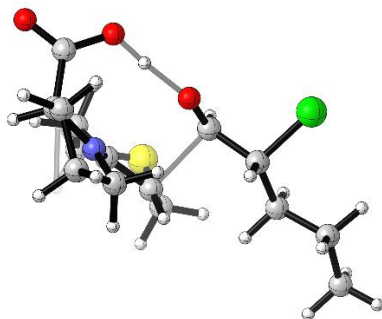

-----  
- Thermochemistry -  
-----

|                                              |                             |
|----------------------------------------------|-----------------------------|
| Zero-point correction=                       | 0.381847 (Hartree/Particle) |
| Thermal correction to Energy=                | 0.399956                    |
| Thermal correction to Enthalpy=              | 0.400821                    |
| Thermal correction to Gibbs Free Energy=     | 0.337245                    |
| Sum of electronic and zero-point Energies=   | -1724.084194                |
| Sum of electronic and thermal Energies=      | -1724.066085                |
| Sum of electronic and thermal Enthalpies=    | -1724.065220                |
| Sum of electronic and thermal Free Energies= | -1724.128796                |

Number of Imaginary Frequencies = 1

E (Single Point Energy) [IEFPCM<sub>(DCM)</sub>M06-2X/6-311++G(2d,2p)] = -1724.766523

|   |             |             |             |
|---|-------------|-------------|-------------|
| C | 0.30963300  | 0.91748400  | -0.88416900 |
| H | 0.73216900  | 0.24609600  | -1.62800000 |
| C | -1.06897400 | 0.80494900  | -0.66539500 |
| N | -1.69478400 | -0.34157400 | -0.94909500 |
| C | -3.06228100 | -0.68739000 | -0.53327800 |
| H | -3.79416700 | -0.07397300 | -1.06971400 |
| C | -1.11659000 | -1.37666600 | -1.83033900 |
| H | -0.35526700 | -1.93880000 | -1.28178800 |
| H | -0.65815300 | -0.89954000 | -2.70018100 |
| C | -2.31652600 | -2.24626400 | -2.19777400 |
| H | -2.02149500 | -3.26747400 | -2.44290500 |
| H | -2.84146600 | -1.81904000 | -3.05757100 |
| C | -3.19261300 | -2.16360100 | -0.95004700 |
| H | -4.23515700 | -2.43535100 | -1.11756300 |
| H | -2.78410000 | -2.80313100 | -0.15975700 |
| C | -1.87406900 | 1.85371700  | 0.07089500  |
| H | -2.90620500 | 1.82741400  | -0.29491700 |
| H | -1.90253900 | 1.59317900  | 1.13611300  |
| C | 0.83832700  | -0.33001800 | 0.81223000  |
| H | 0.95804000  | 0.57956000  | 1.42019900  |

|    |             |             |             |
|----|-------------|-------------|-------------|
| C  | 2.14061100  | -0.99620000 | 0.35116200  |
| O  | -0.10912100 | -1.13637600 | 1.04001800  |
| C  | -3.37242000 | -0.55087400 | 0.96142600  |
| O  | -2.40704600 | -0.73198200 | 1.82821900  |
| O  | -4.52402600 | -0.34529600 | 1.29960400  |
| C  | 3.25298000  | -0.14749300 | -0.24033200 |
| H  | 2.87458700  | 0.28631900  | -1.17251900 |
| C  | 4.52582800  | -0.92695300 | -0.57635400 |
| H  | 4.98050800  | -1.30835400 | 0.34223700  |
| H  | 4.26081600  | -1.80064400 | -1.18534500 |
| H  | 1.88110300  | -1.82585800 | -0.31189200 |
| H  | 3.49087600  | 0.67955800  | 0.44113400  |
| C  | 5.53145300  | -0.05586600 | -1.32671000 |
| H  | 5.81017600  | 0.81851100  | -0.72954600 |
| H  | 6.44444800  | -0.61304700 | -1.55179900 |
| H  | 5.11374900  | 0.30356500  | -2.27277900 |
| H  | -1.43289100 | -0.86203100 | 1.45631400  |
| C  | -1.33824900 | 3.27219900  | -0.07091400 |
| C  | 1.03071400  | 2.24705200  | -0.79157000 |
| H  | -1.40463100 | 3.62228100  | -1.10549200 |
| H  | -1.92029600 | 3.95014200  | 0.55532000  |
| H  | 2.08156100  | 2.10272500  | -0.53922200 |
| H  | 1.00672500  | 2.76477700  | -1.75773900 |
| S  | 0.38515000  | 3.36980700  | 0.47893200  |
| Cl | 2.75984100  | -1.80164700 | 1.87602600  |

(R)-TS2<sub>T</sub>-Cl-P

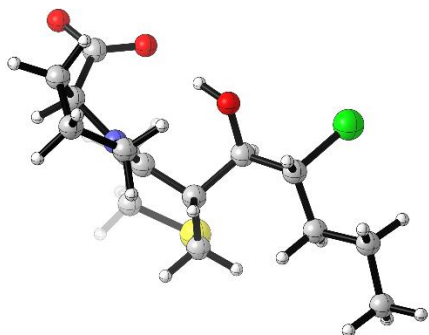

-----  
- Thermochemistry -  
-----

|                                              |                             |
|----------------------------------------------|-----------------------------|
| Zero-point correction=                       | 0.386187 (Hartree/Particle) |
| Thermal correction to Energy=                | 0.404305                    |
| Thermal correction to Enthalpy=              | 0.405170                    |
| Thermal correction to Gibbs Free Energy=     | 0.341075                    |
| Sum of electronic and zero-point Energies=   | -1724.108059                |
| Sum of electronic and thermal Energies=      | -1724.089941                |
| Sum of electronic and thermal Enthalpies=    | -1724.089076                |
| Sum of electronic and thermal Free Energies= | -1724.153172                |

Number of Imaginary Frequencies = 0

E (Single Point Energy) [IEFPCM<sub>(DCM)</sub>M06-2X/6-311++G(2d,2p)] = -1724.794106

|   |             |             |            |
|---|-------------|-------------|------------|
| C | -0.38251300 | 0.50377500  | 0.68483500 |
| H | -0.55863200 | -0.17159800 | 1.52673300 |
| C | 1.10523100  | 0.65497200  | 0.46826700 |
| N | 1.91503000  | -0.26057000 | 0.88508900 |
| C | 3.33213300  | -0.38310600 | 0.43851000 |
| H | 3.90202700  | 0.45229900  | 0.85286600 |
| C | 1.54339800  | -1.40811900 | 1.75989400 |
| H | 1.02267300  | -2.14188800 | 1.13721900 |
| H | 0.88873600  | -1.06683200 | 2.56040300 |



|   |             |             |             |
|---|-------------|-------------|-------------|
| C | 2.89180700  | -1.91345800 | 2.25541400  |
| H | 2.83129800  | -2.95144800 | 2.58492900  |
| H | 3.23564300  | -1.29978200 | 3.09361700  |
| C | 3.79271700  | -1.72090900 | 1.03848200  |
| H | 4.85552800  | -1.69466300 | 1.27769000  |
| H | 3.62128100  | -2.52376400 | 0.31379000  |
| C | 1.61736000  | 1.79090200  | -0.37723600 |
| H | 2.70570300  | 1.84464400  | -0.32550800 |
| H | 1.36010800  | 1.55399900  | -1.41733900 |
| C | -0.92616300 | -0.21670600 | -0.61048400 |
| H | -1.06930800 | 0.54948700  | -1.38553900 |
| C | -2.25313900 | -0.95859100 | -0.36720200 |
| O | -0.04832600 | -1.23058100 | -1.02769000 |
| C | 3.47984800  | -0.40636400 | -1.11225200 |
| O | 2.44852200  | -0.64662900 | -1.79441400 |
| O | 4.64257700  | -0.22651400 | -1.50661300 |
| C | -3.36892800 | -0.25318200 | 0.38751900  |
| H | -2.98704100 | -0.02858800 | 1.39149100  |
| C | -4.63510900 | -1.09429400 | 0.55904100  |
| H | -5.09496200 | -1.27193900 | -0.41712800 |
| H | -4.36040400 | -2.07691800 | 0.96322300  |
| H | -1.99924100 | -1.89559900 | 0.13865700  |
| H | -3.61647800 | 0.69850600  | -0.10047200 |
| C | -5.63818500 | -0.41138500 | 1.48658900  |
| H | -5.92543700 | 0.56965300  | 1.09428500  |
| H | -6.54707500 | -1.00917600 | 1.59244100  |
| H | -5.21451100 | -0.26234800 | 2.48514100  |
| H | 0.82440400  | -0.91147200 | -1.36751300 |

|    |             |             |             |
|----|-------------|-------------|-------------|
| C  | 1.03439200  | 3.15813200  | -0.01348700 |
| C  | -1.04196600 | 1.85274800  | 1.03579800  |
| H  | 1.31582300  | 3.45395100  | 1.00169300  |
| H  | 1.43119200  | 3.90267600  | -0.70508700 |
| H  | -2.11881400 | 1.74684300  | 1.13293700  |
| H  | -0.66459900 | 2.18650800  | 2.00783800  |
| S  | -0.76840900 | 3.17731400  | -0.16923400 |
| Cl | -2.85859100 | -1.47072300 | -2.00568500 |

(S)-TS2<sub>T</sub>-Cl-Pre

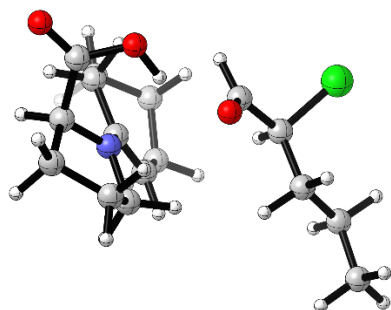

-----  
- Thermochemistry -  
-----

|                                              |                             |
|----------------------------------------------|-----------------------------|
| Zero-point correction=                       | 0.381949 (Hartree/Particle) |
| Thermal correction to Energy=                | 0.401722                    |
| Thermal correction to Enthalpy=              | 0.402587                    |
| Thermal correction to Gibbs Free Energy=     | 0.334442                    |
| Sum of electronic and zero-point Energies=   | -1724.098616                |
| Sum of electronic and thermal Energies=      | -1724.078843                |
| Sum of electronic and thermal Enthalpies=    | -1724.077978                |
| Sum of electronic and thermal Free Energies= | -1724.146124                |

Number of Imaginary Frequencies = 0

E (Single Point Energy) [IEFPCM(DCM)M06-2X/6-311++G(2d,2p)] = -1724.783329

|   |             |             |             |
|---|-------------|-------------|-------------|
| C | 0.02828800  | 0.71964900  | -1.59488600 |
| H | 0.44654900  | -0.16789900 | -2.05916400 |
| C | -1.13370400 | 0.62161000  | -0.90273900 |

|   |             |             |             |
|---|-------------|-------------|-------------|
| N | -1.76560700 | -0.60091200 | -0.71715000 |
| C | -3.09755300 | -0.75081700 | -0.14363100 |
| H | -3.86521700 | -0.18577300 | -0.68803000 |
| C | -1.38083100 | -1.76955200 | -1.51900600 |
| H | -0.52843400 | -2.28279100 | -1.05499400 |
| H | -1.08606700 | -1.45488600 | -2.52562600 |
| C | -2.64098700 | -2.63622000 | -1.55292600 |
| H | -2.41422700 | -3.70160200 | -1.62011400 |
| H | -3.25694900 | -2.35973900 | -2.41412100 |
| C | -3.36180900 | -2.26517800 | -0.25899900 |
| H | -4.43032200 | -2.48432300 | -0.26446600 |
| H | -2.90360800 | -2.78500200 | 0.59002300  |
| C | -1.78982400 | 1.80182600  | -0.21305900 |
| H | -2.86530400 | 1.79173900  | -0.42654500 |
| H | -1.68514600 | 1.68763300  | 0.87392800  |
| C | 0.92283500  | -0.20822800 | 1.19250500  |
| H | 0.46831100  | 0.71535700  | 1.59150400  |
| C | 2.33816500  | -0.06827500 | 0.67466200  |
| O | 0.33359500  | -1.27055700 | 1.22359400  |
| C | -3.20596400 | -0.34610600 | 1.32249600  |
| O | -2.14826500 | -0.58176000 | 2.09560500  |
| O | -4.22699000 | 0.11149700  | 1.78626800  |
| C | 2.87098400  | -1.30369900 | -0.02043100 |
| H | 2.87994500  | -2.14086800 | 0.68657800  |
| C | 4.24945600  | -1.10733000 | -0.64686400 |
| H | 4.21213600  | -0.25780900 | -1.34073900 |
| H | 4.97247800  | -0.84651500 | 0.13372600  |
| H | 2.14290900  | -1.56017600 | -0.80216600 |

|    |             |             |             |
|----|-------------|-------------|-------------|
| C  | 4.71697400  | -2.35934700 | -1.38585100 |
| H  | 5.70447500  | -2.21032200 | -1.82996900 |
| H  | 4.77943700  | -3.21280800 | -0.70319600 |
| H  | 4.02139200  | -2.62273300 | -2.18925100 |
| H  | -1.37202000 | -0.94041100 | 1.60224400  |
| H  | 2.39064500  | 0.82098200  | 0.04163300  |
| C  | -1.24698400 | 3.16547500  | -0.62202500 |
| C  | 0.80980200  | 1.98362500  | -1.83651200 |
| H  | 1.88203300  | 1.76602300  | -1.86819200 |
| H  | 0.55926800  | 2.43917200  | -2.80232700 |
| H  | -1.55090800 | 3.41691200  | -1.64293200 |
| H  | -1.63377200 | 3.93713200  | 0.04567100  |
| S  | 0.56684700  | 3.23522700  | -0.53981600 |
| Cl | 3.31072200  | 0.36137700  | 2.14844100  |

(S)-TS2<sub>T</sub>-Cl

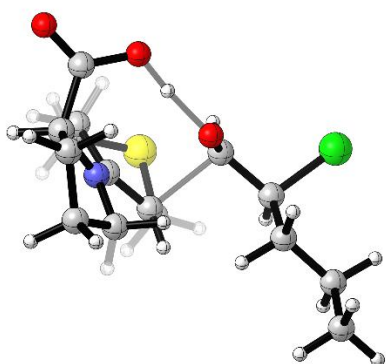

-----  
 - Thermochemistry -  
 -----

|                                            |                             |
|--------------------------------------------|-----------------------------|
| Zero-point correction=                     | 0.381630 (Hartree/Particle) |
| Thermal correction to Energy=              | 0.399823                    |
| Thermal correction to Enthalpy=            | 0.400688                    |
| Thermal correction to Gibbs Free Energy=   | 0.336784                    |
| Sum of electronic and zero-point Energies= | -1724.091371                |

|                                              |              |
|----------------------------------------------|--------------|
| Sum of electronic and thermal Energies=      | -1724.073178 |
| Sum of electronic and thermal Enthalpies=    | -1724.072313 |
| Sum of electronic and thermal Free Energies= | -1724.136217 |

Number of Imaginary Frequencies = 1

E (Single Point Energy) [IEFPCM<sub>(DCM)</sub>M06-2X/6-311++G(2d,2p)] = -1724.773577

|   |             |             |             |
|---|-------------|-------------|-------------|
| C | 0.10934700  | 0.88658400  | -1.17047900 |
| H | 0.69330200  | 0.14985400  | -1.71636600 |
| C | -1.18943600 | 0.51689300  | -0.81099100 |
| N | -1.52897600 | -0.77679800 | -0.75967200 |
| C | -2.75129200 | -1.30173500 | -0.13462200 |
| H | -3.63843600 | -0.99073300 | -0.69641700 |
| C | -0.76287000 | -1.84384200 | -1.43691200 |
| H | 0.11750500  | -2.09859500 | -0.83984600 |
| H | -0.44497200 | -1.49393100 | -2.42251800 |
| C | -1.75643800 | -3.00026600 | -1.50863700 |
| H | -1.25516800 | -3.96744700 | -1.56727200 |
| H | -2.40273100 | -2.88811600 | -2.38452400 |
| C | -2.56809700 | -2.82786300 | -0.22641800 |
| H | -3.53024600 | -3.34069800 | -0.23425200 |
| H | -1.98924100 | -3.17994800 | 0.63465100  |
| C | -2.19189100 | 1.51176600  | -0.26820200 |
| H | -3.20313500 | 1.16369700  | -0.50266700 |
| H | -2.10666600 | 1.53527800  | 0.82627400  |
| C | 0.88254500  | 0.37143300  | 0.78475300  |
| H | 0.54032200  | 1.33455100  | 1.18963400  |
| C | 2.36288500  | 0.33484500  | 0.41686600  |
| O | 0.35417900  | -0.70685500 | 1.18093500  |
| C | -2.97806600 | -0.89725300 | 1.32576200  |

|    |             |             |             |
|----|-------------|-------------|-------------|
| O  | -1.93500000 | -0.68181400 | 2.08810900  |
| O  | -4.11912400 | -0.85196300 | 1.74942800  |
| C  | 2.84150200  | -1.00026700 | -0.12335000 |
| H  | 2.62780700  | -1.78062600 | 0.61473200  |
| C  | 4.31494600  | -1.01854800 | -0.52526400 |
| H  | 4.50742800  | -0.20382800 | -1.23486500 |
| H  | 4.93651600  | -0.82407400 | 0.35495300  |
| H  | 2.23059400  | -1.22729000 | -1.00746300 |
| C  | 4.71144200  | -2.35434500 | -1.15083100 |
| H  | 5.76881300  | -2.36334300 | -1.42780900 |
| H  | 4.53987000  | -3.17760600 | -0.44987500 |
| H  | 4.12466700  | -2.55493600 | -2.05332800 |
| H  | -0.97498300 | -0.70379900 | 1.64541800  |
| H  | 2.63042800  | 1.15522400  | -0.24875600 |
| C  | -2.02539600 | 2.92704600  | -0.80952800 |
| C  | 0.49316100  | 2.31232800  | -1.49913200 |
| H  | 1.56189900  | 2.47354400  | -1.33734500 |
| H  | 0.30532200  | 2.52522900  | -2.55785500 |
| H  | -2.22777300 | 2.96478100  | -1.88416300 |
| H  | -2.72618900 | 3.59730900  | -0.30926200 |
| S  | -0.35718100 | 3.56658400  | -0.49792500 |
| Cl | 3.23401700  | 0.73483200  | 1.97456200  |

(S)-TS2<sub>T</sub>-Cl-P

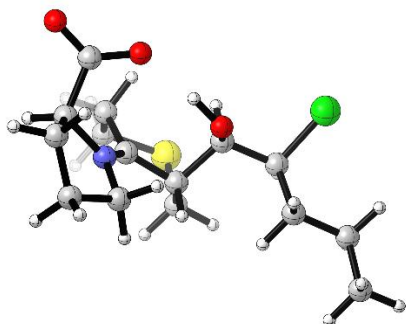

-----  
- Thermochemistry -  
-----

|                                              |                             |
|----------------------------------------------|-----------------------------|
| Zero-point correction=                       | 0.385949 (Hartree/Particle) |
| Thermal correction to Energy=                | 0.404276                    |
| Thermal correction to Enthalpy=              | 0.405141                    |
| Thermal correction to Gibbs Free Energy=     | 0.340480                    |
| Sum of electronic and zero-point Energies=   | -1724.115711                |
| Sum of electronic and thermal Energies=      | -1724.097383                |
| Sum of electronic and thermal Enthalpies=    | -1724.096518                |
| Sum of electronic and thermal Free Energies= | -1724.161179                |

Number of Imaginary Frequencies = 0

E (Single Point Energy) [IEFPCM<sub>(DCM)</sub>M06-2X/6-311++G(2d,2p)] = -1724.801604

|   |             |             |             |
|---|-------------|-------------|-------------|
| C | 0.32359000  | 0.47851400  | -0.84354000 |
| H | 0.54565800  | -0.38552900 | -1.47169000 |
| C | -1.15912700 | 0.55972100  | -0.60423100 |
| N | -1.89944600 | -0.48326300 | -0.78235700 |
| C | -3.24980100 | -0.63919000 | -0.17934600 |
| H | -3.93386500 | 0.08017500  | -0.63534400 |
| C | -1.48566300 | -1.74048200 | -1.46709400 |
| H | -0.87772700 | -2.32151200 | -0.76755000 |
| H | -0.90266300 | -1.50126300 | -2.35527400 |

|   |             |             |             |
|---|-------------|-------------|-------------|
| C | -2.82019400 | -2.40869800 | -1.76999800 |
| H | -2.70086200 | -3.47989100 | -1.93733500 |
| H | -3.26862600 | -1.96263300 | -2.66295200 |
| C | -3.64723700 | -2.08376500 | -0.52766000 |
| H | -4.72273200 | -2.16687100 | -0.68224800 |
| H | -3.36435000 | -2.74925600 | 0.29454100  |
| C | -1.72747700 | 1.80962500  | 0.01128600  |
| H | -2.81819300 | 1.79117100  | -0.02536600 |
| H | -1.44603900 | 1.81048200  | 1.07106000  |
| C | 0.91327100  | 0.15517400  | 0.58015000  |
| H | 0.64182500  | 0.96816900  | 1.26497700  |
| C | 2.44264800  | 0.08852300  | 0.54067300  |
| O | 0.40560400  | -1.07123500 | 1.02717700  |
| C | -3.21092200 | -0.43662400 | 1.36611800  |
| O | -2.08681400 | -0.51538600 | 1.93146300  |
| O | -4.32581400 | -0.26399100 | 1.88182700  |
| C | 3.00362800  | -1.02915700 | -0.32650800 |
| H | 2.60171900  | -1.98702000 | 0.02263200  |
| C | 4.52975900  | -1.07482800 | -0.38877500 |
| H | 4.90923400  | -0.08678900 | -0.67959100 |
| H | 4.93007400  | -1.28553500 | 0.60775900  |
| H | 2.62423700  | -0.87406900 | -1.34641300 |
| C | 5.02241600  | -2.13099700 | -1.37603600 |
| H | 6.11455300  | -2.16561500 | -1.40543100 |
| H | 4.66185300  | -3.12528000 | -1.09309300 |
| H | 4.66451100  | -1.92050000 | -2.38924900 |
| H | -0.49331200 | -0.93087300 | 1.41264600  |
| H | 2.84022800  | 1.05816600  | 0.23156400  |



|    |             |             |             |
|----|-------------|-------------|-------------|
| C  | -1.23056700 | 3.09624000  | -0.65873900 |
| C  | 0.89479000  | 1.72398200  | -1.53261400 |
| H  | 1.97532700  | 1.62777600  | -1.65402000 |
| H  | 0.46719200  | 1.81499700  | -2.53570400 |
| H  | -1.57297100 | 3.15397300  | -1.69635100 |
| H  | -1.64050700 | 3.95261800  | -0.12142200 |
| S  | 0.57669900  | 3.26146100  | -0.62217800 |
| Cl | 3.01740500  | -0.08933900 | 2.25407900  |

**Supplementary Table 8.** Energies for enamine addition to 2-fluoropentanal. Reported Gibbs free energies for structures optimized at the IEFPCM<sub>(DCM)</sub>M06-2X/6-311++G(2d,2p)//IEFPCM<sub>(DCM)</sub>M06-2X/6-31+G(d,p) level of theory represent the sum of the thermal correction to Gibbs free energy computed at the IEFPCM<sub>(DCM)</sub>M06-2X/6-31+G(d,p) level of theory and single point electronic energies computed at the IEFPCM<sub>(DCM)</sub>M06-2X/6-311++G(2d,2p). All energies are reported in Hartrees.

| Structure                                 | Single Point Energies, E<br>IEFPCM <sub>(DCM)</sub> M06-2X/6-311++G(2d,2p) | Thermal Corrections to Gibbs Free Energies,<br>IEFPCM <sub>(DCM)</sub> M06-2X/6-31+G(d,p) | Gibbs Free Energies (G),<br>IEFPCM <sub>(DCM)</sub> M06-2X/6-31+G(d,p) | Gibbs Free Energies (G),<br>IEFPCM <sub>(DCM)</sub> M06-2X/6-311++G(2d,2p)//<br>IEFPCM <sub>(DCM)</sub> M06-2X/6-31+G(d,p) |
|-------------------------------------------|----------------------------------------------------------------------------|-------------------------------------------------------------------------------------------|------------------------------------------------------------------------|----------------------------------------------------------------------------------------------------------------------------|
| 2-Fluoropentanal                          | -370.97333955                                                              | 0.104800                                                                                  | -370.761392                                                            | -370.8685396                                                                                                               |
| Enamine of Cyclohexanone (G)              | -634.55147535                                                              | 0.238392                                                                                  | -634.142903                                                            | -634.3130834                                                                                                               |
| Enamine of Dioxane (O)                    | -784.98483791                                                              | 0.244077                                                                                  | -784.522619                                                            | -784.7407609                                                                                                               |
| Enamine of Tetrahydro-4H-thiopyranone (T) | -993.43210840                                                              | 0.210205                                                                                  | -993.028735                                                            | -993.2219034                                                                                                               |
| Enamine of Tetrahydro-4H-pyranone (P)     | -670.45469021                                                              | 0.214793                                                                                  | -670.055312                                                            | -670.2398972                                                                                                               |
| (R)-TS <sub>2P</sub> -F-Pre               | -1041.446105                                                               | 0.339912                                                                                  | -1040.814983                                                           | -1041.106193                                                                                                               |
| (R)-TS <sub>2P</sub> -F                   | -1041.429464                                                               | 0.343633                                                                                  | -1040.796259                                                           | -1041.085831                                                                                                               |
| (R)-TS <sub>2P</sub> -F-P                 | -1041.461821                                                               | 0.34743                                                                                   | -1040.824973                                                           | -1041.114382                                                                                                               |
| (S)-TS <sub>2P</sub> -F-Pre               | -1041.445581                                                               | 0.338546                                                                                  | -1040.815816                                                           | -1041.107035                                                                                                               |
| (S)-TS <sub>2P</sub> -F                   | -1041.434367                                                               | 0.34289                                                                                   | -1040.801762                                                           | -1041.091477                                                                                                               |
| (S)-TS <sub>2P</sub> -F-P                 | -1041.465939                                                               | 0.347487                                                                                  | -1040.82909                                                            | -1041.118452                                                                                                               |
| (R)-TS <sub>2G</sub> -F-Pre               | -1005.542966                                                               | 0.364056                                                                                  | -1004.901994                                                           | -1005.17891                                                                                                                |
| (R)-TS <sub>2G</sub> -F                   | -1005.526459                                                               | 0.367328                                                                                  | -1004.883971                                                           | -1005.159131                                                                                                               |
| (R)-TS <sub>2G</sub> -F-P                 | -1005.55985                                                                | 0.371357                                                                                  | -1004.913474                                                           | -1005.188493                                                                                                               |
| (S)-TS <sub>2G</sub> -F-Pre               | -1005.542429                                                               | 0.363048                                                                                  | -1004.902509                                                           | -1005.179381                                                                                                               |
| (S)-TS <sub>2G</sub> -F                   | -1005.5316                                                                 | 0.366632                                                                                  | -1004.889686                                                           | -1005.164968                                                                                                               |
| (S)-TS <sub>2G</sub> -F-P                 | -1005.56497                                                                | 0.370935                                                                                  | -1004.919076                                                           | -1005.194035                                                                                                               |
| (R)-TS <sub>2O</sub> -F-Pre               | -1155.977111                                                               | 0.368522                                                                                  | -1155.283743                                                           | -1155.608589                                                                                                               |

|                             |              |          |              |              |
|-----------------------------|--------------|----------|--------------|--------------|
| (R)-TS2 <sub>O</sub> -F     | -1155.958868 | 0.371067 | -1155.264945 | -1155.587801 |
| (R)-TS2 <sub>O</sub> -F-P   | -1155.987905 | 0.374936 | -1155.290267 | -1155.612969 |
| (S)-TS2 <sub>O</sub> -F-Pre | -1155.97545  | 0.368391 | -1155.28244  | -1155.607059 |
| (S)-TS2 <sub>O</sub> -F     | -1155.963577 | 0.371738 | -1155.268666 | -1155.591839 |
| (S)-TS2 <sub>O</sub> -F-P   | -1155.990832 | 0.373799 | -1155.294111 | -1155.617033 |
| (R)-TS2 <sub>T</sub> -F-Pre | -1364.422147 | 0.335876 | -1363.786031 | -1364.086271 |
| (R)-TS2 <sub>T</sub> -F     | -1364.406058 | 0.339298 | -1363.768554 | -1364.06676  |
| (R)-TS2 <sub>T</sub> -F-P   | -1364.406058 | 0.339298 | -1363.768554 | -1364.06676  |
| (S)-TS2 <sub>T</sub> -F-Pre | -1364.421894 | 0.335488 | -1363.786192 | -1364.086406 |
| (S)-TS2 <sub>T</sub> -F     | -1364.411596 | 0.338699 | -1363.774512 | -1364.072897 |
| (S)-TS2 <sub>T</sub> -F-P   | -1364.441868 | 0.342929 | -1363.80105  | -1364.098939 |

Pre – Precomplex

P – Product

(R)-TS2<sub>P</sub>-F-Pre

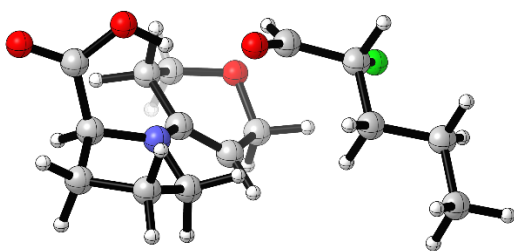

-----  
- Thermochemistry -  
-----

|                                              |                             |
|----------------------------------------------|-----------------------------|
| Zero-point correction=                       | 0.386791 (Hartree/Particle) |
| Thermal correction to Energy=                | 0.405842                    |
| Thermal correction to Enthalpy=              | 0.406707                    |
| Thermal correction to Gibbs Free Energy=     | 0.339912                    |
| Sum of electronic and zero-point Energies=   | -1040.768103                |
| Sum of electronic and thermal Energies=      | -1040.749052                |
| Sum of electronic and thermal Enthalpies=    | -1040.748187                |
| Sum of electronic and thermal Free Energies= | -1040.814983                |

Number of Imaginary Frequencies = 0

E (Single Point Energy) [IEFPCM(DCM)M06-2X/6-311++G(2d,2p)] = -1041.446105

|   |             |             |             |
|---|-------------|-------------|-------------|
| C | 0.31310000  | 1.12235000  | -1.39447400 |
| H | 0.83282500  | 0.35114700  | -1.95381800 |
| C | -0.86092700 | 0.86958400  | -0.77940900 |
| N | -1.39573900 | -0.40785000 | -0.66350500 |
| C | -2.82857100 | -0.64769400 | -0.51612700 |
| H | -3.44097400 | 0.08202000  | -1.05505600 |
| C | -0.72088000 | -1.54700700 | -1.28372300 |
| H | 0.28024900  | -1.66168700 | -0.85604500 |
| H | -0.62035300 | -1.40164700 | -2.37104800 |
| C | -1.65381200 | -2.71072000 | -0.96903200 |
| H | -1.48726200 | -3.05707200 | 0.05681600  |
| H | -1.51412400 | -3.55548800 | -1.64556700 |
| C | -3.03418300 | -2.06289500 | -1.10569700 |
| H | -3.29816600 | -1.96505300 | -2.16237800 |
| H | -3.83647300 | -2.60481600 | -0.60180500 |
| C | -1.58830200 | 1.97455300  | -0.04835200 |
| H | -2.65522500 | 1.97448400  | -0.29758400 |
| H | -1.51664300 | 1.80812100  | 1.03577200  |
| C | 1.16020500  | 0.30706500  | 1.47249900  |
| H | 0.81884100  | 1.35781300  | 1.47493300  |
| C | 2.64674600  | 0.10019400  | 1.27330800  |
| O | 0.40642600  | -0.62516800 | 1.66917800  |
| C | -3.29867700 | -0.60911700 | 0.94094800  |
| O | -2.37023700 | -0.67508100 | 1.88927400  |
| O | -4.47709600 | -0.55922600 | 1.22115100  |

|   |             |             |             |
|---|-------------|-------------|-------------|
| C | 2.98743000  | -0.97308800 | 0.25765400  |
| H | 2.43118700  | -1.87594500 | 0.53772000  |
| C | 4.48429800  | -1.26938300 | 0.18648600  |
| H | 5.02496400  | -0.34766800 | -0.05426600 |
| H | 4.83302700  | -1.59364200 | 1.17455300  |
| H | 3.08381500  | -0.13622000 | 2.25345100  |
| H | 2.61580400  | -0.64965400 | -0.72292000 |
| C | 4.79940100  | -2.34274700 | -0.85290000 |
| H | 4.28332400  | -3.27878400 | -0.61591800 |
| H | 5.87173600  | -2.55011100 | -0.89498800 |
| H | 4.47830500  | -2.02567300 | -1.85036900 |
| H | -1.45809500 | -0.66404400 | 1.52089500  |
| C | -0.99591500 | 3.33191500  | -0.40957500 |
| C | 0.97044700  | 2.47762800  | -1.33366200 |
| H | -1.29124800 | 3.61584000  | -1.43089500 |
| H | -1.34247900 | 4.10372500  | 0.27983100  |
| H | 2.03302800  | 2.37442800  | -1.09500300 |
| H | 0.89272300  | 2.99875500  | -2.30246200 |
| O | 0.41707600  | 3.29610800  | -0.31596900 |
| F | 3.18443100  | 1.32658200  | 0.87599400  |

(R)-TS2<sub>p</sub>-F

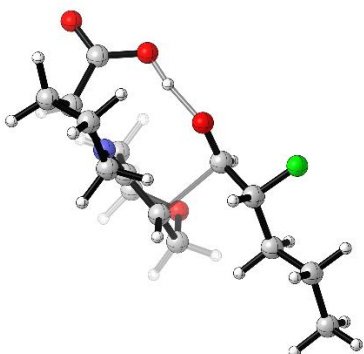

-----  
- Thermochemistry -  
-----

|                                              |                             |
|----------------------------------------------|-----------------------------|
| Zero-point correction=                       | 0.387182 (Hartree/Particle) |
| Thermal correction to Energy=                | 0.404578                    |
| Thermal correction to Enthalpy=              | 0.405443                    |
| Thermal correction to Gibbs Free Energy=     | 0.343633                    |
| Sum of electronic and zero-point Energies=   | -1040.752710                |
| Sum of electronic and thermal Energies=      | -1040.735314                |
| Sum of electronic and thermal Enthalpies=    | -1040.734449                |
| Sum of electronic and thermal Free Energies= | -1040.796259                |

Number of Imaginary Frequencies = 1

E (Single Point Energy) [IEFPCM<sub>(DCM)</sub>M06-2X/6-311++G(2d,2p)] = -1041.429464

|   |             |             |             |
|---|-------------|-------------|-------------|
| C | 0.55685300  | 0.96400700  | -0.86463000 |
| H | 0.96146500  | 0.28563000  | -1.61103800 |
| C | -0.81418400 | 0.95421300  | -0.63043800 |
| N | -1.56393300 | -0.12715200 | -0.87509300 |
| C | -2.99431400 | -0.23610000 | -0.56995700 |
| H | -3.54469900 | 0.62799900  | -0.94918400 |
| C | -1.07155500 | -1.29652600 | -1.62358400 |
| H | -0.09125900 | -1.59421800 | -1.25403500 |
| H | -0.99528100 | -1.03889200 | -2.68813100 |
| C | -2.14245700 | -2.34878000 | -1.36351000 |

|   |             |             |             |
|---|-------------|-------------|-------------|
| H | -1.95351300 | -2.82900200 | -0.39776800 |
| H | -2.16456100 | -3.11734600 | -2.13735500 |
| C | -3.42569300 | -1.51811400 | -1.31134200 |
| H | -3.74480300 | -1.25125000 | -2.32270500 |
| H | -4.25750500 | -2.01241300 | -0.80793000 |
| C | -1.44833200 | 2.09364800  | 0.12988700  |
| H | -2.46308100 | 2.28307500  | -0.23080900 |
| H | -1.52614300 | 1.80890900  | 1.18804700  |
| C | 0.94534500  | -0.29622800 | 0.92011500  |
| H | 1.08895800  | 0.63255400  | 1.49388900  |
| C | 2.21589500  | -1.03852800 | 0.49047500  |
| O | -0.04554000 | -1.03953300 | 1.13937400  |
| C | -3.34083900 | -0.32549600 | 0.92669500  |
| O | -2.40057500 | -0.59135000 | 1.80150700  |
| O | -4.50190000 | -0.16751100 | 1.25581600  |
| C | 3.42540000  | -0.24619300 | 0.04136800  |
| H | 3.20113600  | 0.22292700  | -0.92260600 |
| C | 4.66783800  | -1.12510200 | -0.11904800 |
| H | 4.91907300  | -1.57867900 | 0.84423800  |
| H | 4.43881300  | -1.94930600 | -0.80632200 |
| H | 1.94108100  | -1.80473000 | -0.24399500 |
| H | 3.62794600  | 0.55500300  | 0.76407400  |
| C | 5.85883500  | -0.32733900 | -0.64549600 |
| H | 5.63765200  | 0.10846200  | -1.62538700 |
| H | 6.74383100  | -0.96032300 | -0.75063600 |
| H | 6.11052800  | 0.49176000  | 0.03605300  |
| H | -1.43219400 | -0.71378000 | 1.45801000  |
| C | -0.61632100 | 3.36324100  | 0.00537900  |

|   |             |             |             |
|---|-------------|-------------|-------------|
| C | 1.32272900  | 2.25856500  | -0.66790200 |
| H | -0.69095700 | 3.77337800  | -1.01260100 |
| H | -0.96231700 | 4.11914700  | 0.71166000  |
| H | 2.34021900  | 2.06969500  | -0.32331200 |
| H | 1.39368700  | 2.80764300  | -1.62107400 |
| O | 0.73623100  | 3.09126700  | 0.31359600  |
| F | 2.58094800  | -1.73786400 | 1.66046000  |

**(R)-TS2<sub>p</sub>-F-P**

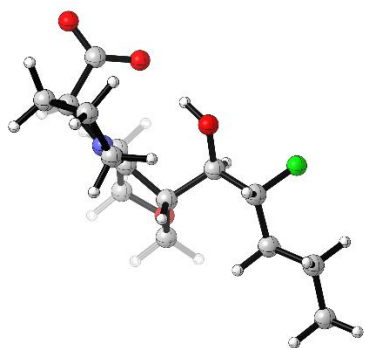

-----  
- Thermochemistry -  
-----

|                                              |                             |
|----------------------------------------------|-----------------------------|
| Zero-point correction=                       | 0.391106 (Hartree/Particle) |
| Thermal correction to Energy=                | 0.408479                    |
| Thermal correction to Enthalpy=              | 0.409344                    |
| Thermal correction to Gibbs Free Energy=     | 0.347439                    |
| Sum of electronic and zero-point Energies=   | -1040.781306                |
| Sum of electronic and thermal Energies=      | -1040.763933                |
| Sum of electronic and thermal Enthalpies=    | -1040.763068                |
| Sum of electronic and thermal Free Energies= | -1040.824973                |

Number of Imaginary Frequencies = 0

E (Single Point Energy) [IEFPCM(DCM)M06-2X/6-311++G(2d,2p)] = -1041.461821

|   |             |             |             |
|---|-------------|-------------|-------------|
| C | 0.60109000  | 0.57670600  | -0.59108100 |
| H | 0.79864300  | -0.09624500 | -1.43168300 |
| C | -0.88120300 | 0.79748500  | -0.44720200 |



|   |             |             |             |
|---|-------------|-------------|-------------|
| N | -1.72573000 | -0.09226300 | -0.84143400 |
| C | -3.17412600 | -0.05763900 | -0.53312200 |
| H | -3.59046800 | 0.91217000  | -0.80850600 |
| C | -1.36149100 | -1.38165700 | -1.50084500 |
| H | -0.49132100 | -1.80732800 | -1.00507100 |
| H | -1.13775300 | -1.16413300 | -2.54981200 |
| C | -2.62045500 | -2.23070700 | -1.34952600 |
| H | -2.60412100 | -2.74771300 | -0.38519500 |
| H | -2.69460600 | -2.97605500 | -2.14215100 |
| C | -3.74475700 | -1.19533400 | -1.37915400 |
| H | -3.92509100 | -0.85241500 | -2.40275700 |
| H | -4.68357400 | -1.55044100 | -0.95481900 |
| C | -1.31118700 | 2.02457700  | 0.29886400  |
| H | -2.37137700 | 2.23946000  | 0.16732000  |
| H | -1.15883200 | 1.80224900  | 1.36327600  |
| C | 1.08720900  | -0.09916100 | 0.74110300  |
| H | 1.27103000  | 0.69627300  | 1.47893600  |
| C | 2.37406900  | -0.90701000 | 0.55031600  |
| O | 0.16535300  | -1.04791600 | 1.22202700  |
| C | -3.41614800 | -0.27522800 | 1.00599300  |
| O | -2.40576800 | -0.36349600 | 1.75067300  |
| O | -4.61593900 | -0.32105400 | 1.31703600  |
| C | 3.57049500  | -0.24411200 | -0.10397100 |
| H | 3.31266900  | 0.00372400  | -1.14079300 |
| C | 4.79767800  | -1.15799600 | -0.11395400 |
| H | 5.07692600  | -1.39963400 | 0.91592400  |
| H | 4.53504400  | -2.10550000 | -0.60100100 |
| H | 2.10706500  | -1.82638000 | 0.01157100  |

|   |             |             |             |
|---|-------------|-------------|-------------|
| H | 3.80962900  | 0.69206900  | 0.41701800  |
| C | 5.97814300  | -0.51291300 | -0.83646100 |
| H | 5.72712700  | -0.29116000 | -1.87901400 |
| H | 6.85125000  | -1.17062800 | -0.83314900 |
| H | 6.26381000  | 0.42721500  | -0.35348500 |
| H | -0.71235000 | -0.67621300 | 1.47375000  |
| C | -0.46071400 | 3.23848100  | -0.08074300 |
| C | 1.28655600  | 1.92888200  | -0.88534400 |
| H | -0.68578000 | 3.56917900  | -1.10466700 |
| H | -0.66692100 | 4.06033300  | 0.60516600  |
| H | 2.36816600  | 1.83877900  | -0.82090600 |
| H | 1.02986400  | 2.24308000  | -1.90751900 |
| O | 0.91221900  | 2.92887800  | 0.03469800  |
| F | 2.76146700  | -1.30804500 | 1.83698800  |

(S)-TS2<sub>P</sub>-F-Pre

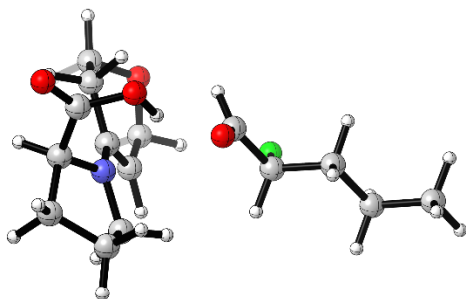

-----  
 - Thermochemistry -  
 -----

|                                              |                             |
|----------------------------------------------|-----------------------------|
| Zero-point correction=                       | 0.386567 (Hartree/Particle) |
| Thermal correction to Energy=                | 0.405753                    |
| Thermal correction to Enthalpy=              | 0.406618                    |
| Thermal correction to Gibbs Free Energy=     | 0.338546                    |
| Sum of electronic and zero-point Energies=   | -1040.767795                |
| Sum of electronic and thermal Energies=      | -1040.748609                |
| Sum of electronic and thermal Enthalpies=    | -1040.747744                |
| Sum of electronic and thermal Free Energies= | -1040.815816                |

Number of Imaginary Frequencies = 0

E (Single Point Energy) [IEFPCM(DCM)M06-2X/6-311++G(2d,2p)] = -1041.445581

|   |             |             |             |
|---|-------------|-------------|-------------|
| C | -0.22542200 | 1.57588300  | -1.27323400 |
| H | 0.16865300  | 1.06030300  | -2.14366500 |
| C | -1.20257800 | 1.03258300  | -0.51706900 |
| N | -1.65813000 | -0.26974700 | -0.68534700 |
| C | -3.00617900 | -0.68041500 | -0.29863600 |
| H | -3.74585000 | 0.11649400  | -0.42302200 |
| C | -1.14065700 | -1.09328900 | -1.77780300 |
| H | -0.06260800 | -1.23865800 | -1.65620800 |
| H | -1.31928400 | -0.61175200 | -2.75210600 |
| C | -1.94302600 | -2.38247200 | -1.64562000 |
| H | -1.51826500 | -3.00772900 | -0.85280700 |
| H | -1.96108500 | -2.96195600 | -2.57008800 |
| C | -3.32546100 | -1.86166900 | -1.24450500 |
| H | -3.84796600 | -1.47318100 | -2.12304100 |
| H | -3.96527700 | -2.60686600 | -0.76858000 |
| C | -1.74537800 | 1.78590700  | 0.67566100  |
| H | -2.83936400 | 1.73980200  | 0.70812900  |
| H | -1.37940500 | 1.31527700  | 1.59912200  |
| C | 1.33661000  | -0.01218900 | 0.75615400  |
| H | 1.10725100  | 0.95667200  | 1.23569800  |
| C | 2.59320100  | -0.06051300 | -0.08554100 |
| H | 2.35170500  | -0.43506600 | -1.08759400 |
| O | 0.66027900  | -1.00606700 | 0.93357200  |
| C | -3.10347100 | -1.12996100 | 1.16206800  |
| O | -1.96878800 | -1.38608800 | 1.80435600  |

|   |             |             |             |
|---|-------------|-------------|-------------|
| O | -4.17732900 | -1.28341400 | 1.70309100  |
| H | -1.17869400 | -1.17491200 | 1.25893500  |
| C | 3.66924200  | -0.91001400 | 0.57353200  |
| H | 3.24546900  | -1.90878200 | 0.73117600  |
| C | 4.94247300  | -0.99736300 | -0.26627300 |
| H | 4.69594400  | -1.42107200 | -1.24759700 |
| H | 3.89345700  | -0.49011400 | 1.56249300  |
| C | 6.01043500  | -1.85032700 | 0.41489100  |
| H | 6.91610700  | -1.90965300 | -0.19420700 |
| H | 6.28477100  | -1.42757300 | 1.38664900  |
| H | 5.64822400  | -2.86966200 | 0.58272200  |
| H | 5.32937700  | 0.01155900  | -0.44368900 |
| C | 0.36922900  | 2.92521700  | -0.95665800 |
| C | -1.31296000 | 3.24662500  | 0.62888800  |
| H | 1.45918900  | 2.88644600  | -1.02822600 |
| H | 0.01148300  | 3.68822700  | -1.66812300 |
| H | -1.87477100 | 3.78478600  | -0.14942400 |
| H | -1.49216600 | 3.73567700  | 1.58796000  |
| O | 0.07519200  | 3.34459400  | 0.36584100  |
| F | 3.05209200  | 1.24997200  | -0.23078700 |

(S)-TS2<sub>P</sub>-F

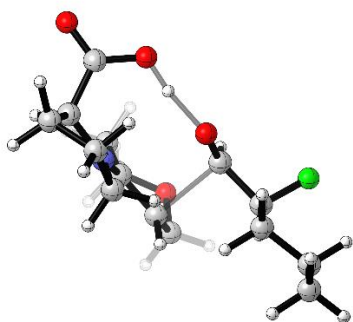

-----  
- Thermochemistry -  
-----

|                                              |                             |
|----------------------------------------------|-----------------------------|
| Zero-point correction=                       | 0.386859 (Hartree/Particle) |
| Thermal correction to Energy=                | 0.404387                    |
| Thermal correction to Enthalpy=              | 0.405252                    |
| Thermal correction to Gibbs Free Energy=     | 0.342890                    |
| Sum of electronic and zero-point Energies=   | -1040.757793                |
| Sum of electronic and thermal Energies=      | -1040.740265                |
| Sum of electronic and thermal Enthalpies=    | -1040.739400                |
| Sum of electronic and thermal Free Energies= | -1040.801762                |

Number of Imaginary Frequencies = 1

E (Single Point Energy) [IEFPCM(DCM)M06-2X/6-311++G(2d,2p)] = -1041.434367

|   |             |             |             |
|---|-------------|-------------|-------------|
| C | 0.29619200  | 1.25786300  | -1.04989500 |
| H | 0.92793900  | 0.62419400  | -1.66593900 |
| C | -1.00172400 | 0.85316000  | -0.77002400 |
| N | -1.37244800 | -0.43406900 | -0.82779900 |
| C | -2.69218700 | -0.93631500 | -0.43738400 |
| H | -3.49268900 | -0.34142200 | -0.88267900 |
| C | -0.53479500 | -1.48874300 | -1.42657500 |
| H | 0.48235900  | -1.42202800 | -1.04386600 |
| H | -0.52525500 | -1.36739000 | -2.51776400 |
| C | -1.23509400 | -2.77313400 | -0.99754100 |

|   |             |             |             |
|---|-------------|-------------|-------------|
| H | -0.91021700 | -3.04685900 | 0.01185400  |
| H | -1.02016100 | -3.60554100 | -1.66911400 |
| C | -2.71135200 | -2.37284400 | -0.99754700 |
| H | -3.09692200 | -2.34763000 | -2.02063600 |
| H | -3.35148200 | -3.02754800 | -0.40465100 |
| C | -1.97226400 | 1.84378400  | -0.17267000 |
| H | -2.98533600 | 1.66264000  | -0.54212400 |
| H | -1.99477800 | 1.70450000  | 0.91712100  |
| C | 0.96782900  | 0.53108900  | 0.94244100  |
| H | 0.59796000  | 1.46745000  | 1.38779700  |
| C | 2.46859900  | 0.53084300  | 0.65216600  |
| H | 2.76679400  | 1.41236600  | 0.07868500  |
| O | 0.41241000  | -0.56310200 | 1.21141900  |
| C | -2.96281400 | -0.93607500 | 1.07705600  |
| O | -1.96303100 | -0.80991600 | 1.91728400  |
| O | -4.10992200 | -1.08222300 | 1.45716000  |
| H | -1.00525300 | -0.68493500 | 1.53744900  |
| C | 3.00776900  | -0.74178400 | 0.03772600  |
| H | 2.59040800  | -0.83750000 | -0.97273900 |
| C | 4.53413200  | -0.75140100 | -0.04962400 |
| H | 4.87120100  | 0.12703500  | -0.61428100 |
| H | 2.64686700  | -1.59668400 | 0.62027500  |
| C | 5.05498700  | -2.02407900 | -0.71381400 |
| H | 6.14687000  | -2.02555300 | -0.76743500 |
| H | 4.74415200  | -2.91079000 | -0.15191000 |
| H | 4.66703200  | -2.12098100 | -1.73324000 |
| H | 4.95348800  | -0.65908300 | 0.95726100  |
| C | 0.62774100  | 2.73465700  | -1.07210200 |

|   |             |            |             |
|---|-------------|------------|-------------|
| C | -1.56420700 | 3.27587400 | -0.49966400 |
| H | 1.65486800  | 2.91540200 | -0.74383700 |
| H | 0.53927400  | 3.13300300 | -2.09578300 |
| H | -1.74752900 | 3.49111400 | -1.56274600 |
| H | -2.13580900 | 3.98346000 | 0.10234400  |
| O | -0.19734000 | 3.48294500 | -0.20030000 |
| F | 3.04994900  | 0.69691800 | 1.92786200  |

(S)-TS<sub>2P-F-P</sub>

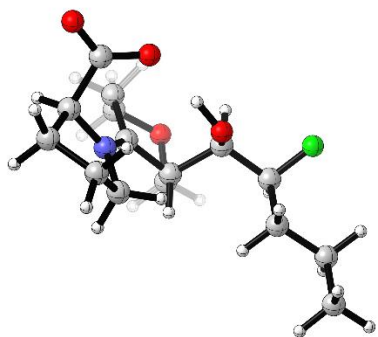

-----  
 - Thermochemistry -  
 -----

|                                              |                             |
|----------------------------------------------|-----------------------------|
| Zero-point correction=                       | 0.391410 (Hartree/Particle) |
| Thermal correction to Energy=                | 0.408817                    |
| Thermal correction to Enthalpy=              | 0.409682                    |
| Thermal correction to Gibbs Free Energy=     | 0.347487                    |
| Sum of electronic and zero-point Energies=   | -1040.785166                |
| Sum of electronic and thermal Energies=      | -1040.767760                |
| Sum of electronic and thermal Enthalpies=    | -1040.766895                |
| Sum of electronic and thermal Free Energies= | -1040.829090                |

Number of Imaginary Frequencies = 0

E (Single Point Energy) [IEFPCM(DCM)M06-2X/6-311++G(2d,2p)] = -1041.465939

|   |             |            |             |
|---|-------------|------------|-------------|
| C | 0.50378500  | 0.89830600 | -0.73559700 |
| H | 0.86430000  | 0.16376800 | -1.45933800 |
| C | -0.98511000 | 0.78669500 | -0.57601300 |

|   |             |             |             |
|---|-------------|-------------|-------------|
| N | -1.59811600 | -0.32274800 | -0.80992300 |
| C | -2.99538600 | -0.59238600 | -0.40203000 |
| H | -3.65252400 | 0.20122000  | -0.75909600 |
| C | -0.95703500 | -1.56460200 | -1.33856400 |
| H | 0.01528600  | -1.70136700 | -0.87004200 |
| H | -0.84807400 | -1.43984900 | -2.42042100 |
| C | -1.95805200 | -2.66187500 | -0.98875500 |
| H | -1.76831500 | -3.02583700 | 0.02571400  |
| H | -1.88273500 | -3.50276500 | -1.67907300 |
| C | -3.30488400 | -1.94079200 | -1.05286900 |
| H | -3.61558900 | -1.79694600 | -2.09236500 |
| H | -4.10339100 | -2.45028100 | -0.51376900 |
| C | -1.68346400 | 1.97777900  | 0.00773100  |
| H | -2.76300800 | 1.93454600  | -0.13718900 |
| H | -1.50170800 | 1.94572600  | 1.08976400  |
| C | 1.10168800  | 0.57424900  | 0.67886100  |
| H | 0.87724800  | 1.42300700  | 1.34080000  |
| C | 2.62269000  | 0.43839900  | 0.62544700  |
| H | 3.06637800  | 1.32495200  | 0.15982300  |
| O | 0.58757400  | -0.62459300 | 1.19654600  |
| C | -3.09907800 | -0.65245300 | 1.16587700  |
| O | -2.04732100 | -0.45885700 | 1.83058200  |
| O | -4.24502200 | -0.88501500 | 1.57876400  |
| H | -0.35331200 | -0.52534200 | 1.47891600  |
| C | 3.13195900  | -0.82898100 | -0.03395300 |
| H | 2.76694300  | -0.85977600 | -1.06934400 |
| C | 4.65838200  | -0.91532800 | -0.03959700 |
| H | 5.06975500  | -0.03734000 | -0.55366400 |



|   |             |             |             |
|---|-------------|-------------|-------------|
| H | 2.69974100  | -1.68936000 | 0.48790600  |
| C | 5.15390700  | -2.19046300 | -0.71807000 |
| H | 6.24582200  | -2.24406400 | -0.71434700 |
| H | 4.77142800  | -3.07800500 | -0.20374100 |
| H | 4.81765800  | -2.23617000 | -1.75931800 |
| H | 5.02423900  | -0.87735300 | 0.99166000  |
| C | 0.87300700  | 2.30255700  | -1.24786500 |
| C | -1.12247800 | 3.28471800  | -0.56434700 |
| H | 1.95223000  | 2.45477800  | -1.21572600 |
| H | 0.54925300  | 2.40199200  | -2.29400900 |
| H | -1.42295600 | 3.40467700  | -1.61494700 |
| H | -1.50683700 | 4.12930100  | 0.00766800  |
| O | 0.28694100  | 3.31688700  | -0.46256400 |
| F | 3.06533500  | 0.45082300  | 1.95727200  |

**(R)-TS2<sub>G</sub>-F-Pre**

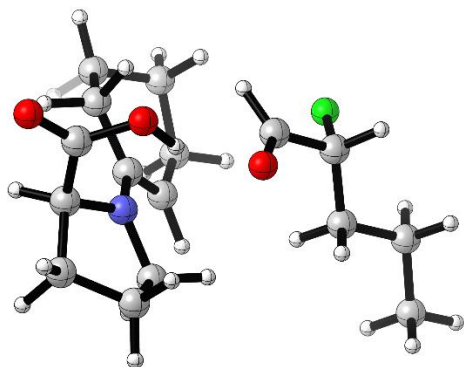

-----  
 - Thermochemistry -  
 -----

|                                            |                             |
|--------------------------------------------|-----------------------------|
| Zero-point correction=                     | 0.410574 (Hartree/Particle) |
| Thermal correction to Energy=              | 0.429753                    |
| Thermal correction to Enthalpy=            | 0.430618                    |
| Thermal correction to Gibbs Free Energy=   | 0.364056                    |
| Sum of electronic and zero-point Energies= | -1004.855476                |
| Sum of electronic and thermal Energies=    | -1004.836297                |

Sum of electronic and thermal Enthalpies= -1004.835432  
Sum of electronic and thermal Free Energies= -1004.901994

Number of Imaginary Frequencies = 0

E (Single Point Energy) [IEFPCM<sub>(DCM)</sub>M06-2X/6-311++G(2d,2p)] = -1005.542966

|   |             |             |             |
|---|-------------|-------------|-------------|
| C | -0.40906400 | 1.04771600  | 1.37340500  |
| H | -0.84477700 | 0.21978700  | 1.92489500  |
| C | 0.78892000  | 0.88270300  | 0.77040500  |
| N | 1.41621600  | -0.36326700 | 0.69425600  |
| C | 2.86232900  | -0.50128200 | 0.55241900  |
| H | 3.42471100  | 0.26983500  | 1.08779300  |
| C | 0.83275000  | -1.52527700 | 1.36205200  |
| H | -0.16729400 | -1.72186200 | 0.96318900  |
| H | 0.74633500  | -1.35590100 | 2.44764100  |
| C | 1.83167700  | -2.63419200 | 1.05418700  |
| H | 1.66426800  | -3.01603300 | 0.04104500  |
| H | 1.76149500  | -3.46960600 | 1.75297200  |
| C | 3.17087100  | -1.89795200 | 1.14469700  |
| H | 3.45975400  | -1.77453700 | 2.19203900  |
| H | 3.99082300  | -2.39569200 | 0.62309100  |
| C | 1.47765600  | 2.01877900  | 0.04317000  |
| H | 2.54400900  | 2.03444700  | 0.29204300  |
| H | 1.42547700  | 1.83554300  | -1.04112600 |
| C | -1.00884300 | -0.14119300 | -1.55337600 |
| H | -0.56926000 | 0.85349800  | -1.74806500 |
| C | -2.51235300 | -0.16944900 | -1.38848700 |
| O | -0.33315600 | -1.14966500 | -1.53798800 |
| C | 3.32035600  | -0.43459200 | -0.90576300 |
| O | 2.41133900  | -0.70385400 | -1.83912000 |

|   |             |             |             |
|---|-------------|-------------|-------------|
| O | 4.47034800  | -0.19356400 | -1.20417400 |
| C | -2.99205800 | -1.01057700 | -0.22206700 |
| H | -2.52154200 | -1.99712300 | -0.31425000 |
| C | -4.51303400 | -1.14514100 | -0.17603300 |
| H | -4.96279500 | -0.14733800 | -0.12971500 |
| H | -4.86186400 | -1.60810300 | -1.10717700 |
| H | -2.94124300 | -0.53075600 | -2.33390000 |
| H | -2.62046100 | -0.55533500 | 0.70384200  |
| C | -4.97101100 | -1.97609600 | 1.02036700  |
| H | -4.54677500 | -2.98460200 | 0.98078400  |
| H | -6.05983700 | -2.06888300 | 1.04423600  |
| H | -4.65146700 | -1.51439100 | 1.96019000  |
| H | 1.51769700  | -0.84748500 | -1.45212200 |
| C | 0.86167700  | 3.37960400  | 0.37382600  |
| C | -1.19026500 | 2.33843000  | 1.35611400  |
| H | 1.16435700  | 3.67674100  | 1.38613100  |
| H | 1.25640000  | 4.13252900  | -0.31483800 |
| H | -2.24795500 | 2.12002200  | 1.16469000  |
| H | -1.15107900 | 2.80949300  | 2.34916900  |
| F | -2.92987500 | 1.15420400  | -1.23505700 |
| C | -0.66193200 | 3.31535100  | 0.30640100  |
| H | -1.09873800 | 4.30735200  | 0.45835600  |
| H | -0.96918200 | 2.97911000  | -0.69283400 |

(R)-TS2<sub>G-F</sub>

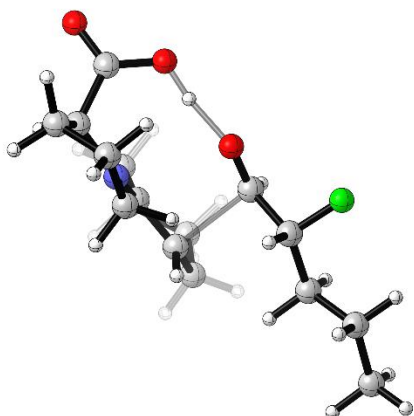

-----  
- Thermochemistry -  
-----

|                                              |                             |
|----------------------------------------------|-----------------------------|
| Zero-point correction=                       | 0.410946 (Hartree/Particle) |
| Thermal correction to Energy=                | 0.428577                    |
| Thermal correction to Enthalpy=              | 0.429442                    |
| Thermal correction to Gibbs Free Energy=     | 0.367328                    |
| Sum of electronic and zero-point Energies=   | -1004.840353                |
| Sum of electronic and thermal Energies=      | -1004.822722                |
| Sum of electronic and thermal Enthalpies=    | -1004.821857                |
| Sum of electronic and thermal Free Energies= | -1004.883971                |

Number of Imaginary Frequencies = 1

E (Single Point Energy) [IEFPCM(DCM)M06-2X/6-311++G(2d,2p)] = -1005.526459

|   |             |             |             |
|---|-------------|-------------|-------------|
| C | 0.55239900  | 0.99127700  | -0.84644800 |
| H | 0.95716100  | 0.28228700  | -1.56464700 |
| C | -0.82046800 | 0.95678200  | -0.62171300 |
| N | -1.53965800 | -0.15157800 | -0.86836700 |
| C | -2.97219800 | -0.29617000 | -0.59082000 |
| H | -3.54196700 | 0.54212700  | -0.99799100 |
| C | -1.00900100 | -1.31163300 | -1.60394400 |
| H | -0.02419500 | -1.58158800 | -1.22727100 |

|   |             |             |             |
|---|-------------|-------------|-------------|
| H | -0.93097400 | -1.06088800 | -2.67043100 |
| C | -2.04846300 | -2.39411800 | -1.34352900 |
| H | -1.85405000 | -2.85674700 | -0.37025400 |
| H | -2.03835800 | -3.17189600 | -2.10854500 |
| C | -3.35676700 | -1.60372700 | -1.31401100 |
| H | -3.67613300 | -1.36341100 | -2.33195700 |
| H | -4.17722900 | -2.11603600 | -0.80957900 |
| C | -1.51745800 | 2.08376100  | 0.10749000  |
| H | -2.55181800 | 2.16804300  | -0.23438600 |
| H | -1.56318700 | 1.81780800  | 1.17439200  |
| C | 0.95059500  | -0.29991300 | 0.94230700  |
| H | 1.10362100  | 0.62130800  | 1.52489400  |
| C | 2.22015700  | -1.03955400 | 0.50605700  |
| O | -0.04081400 | -1.04043600 | 1.16147600  |
| C | -3.34494800 | -0.36583200 | 0.89948000  |
| O | -2.41596400 | -0.61382100 | 1.79290100  |
| O | -4.51192500 | -0.21399300 | 1.21048800  |
| C | 3.42372900  | -0.24741600 | 0.04288700  |
| H | 3.18710800  | 0.22057700  | -0.91834100 |
| C | 4.66558300  | -1.12517200 | -0.12722800 |
| H | 4.92600000  | -1.57838900 | 0.83387700  |
| H | 4.43169800  | -1.94989800 | -0.81230900 |
| H | 1.94338700  | -1.81206300 | -0.22083600 |
| H | 3.63154800  | 0.55659800  | 0.76107400  |
| C | 5.85126400  | -0.32659600 | -0.66445900 |
| H | 5.62050800  | 0.10940200  | -1.64204400 |
| H | 6.73587500  | -0.95872700 | -0.77801700 |
| H | 6.10861600  | 0.49260400  | 0.01492500  |

|   |             |             |             |
|---|-------------|-------------|-------------|
| H | -1.44589500 | -0.72448000 | 1.46066500  |
| C | -0.80433600 | 3.42436000  | -0.05516300 |
| C | 1.33116500  | 2.28434300  | -0.68485700 |
| H | -0.91452500 | 3.77537900  | -1.08874800 |
| H | -1.28315400 | 4.16445100  | 0.59199300  |
| H | 2.34834600  | 2.07371500  | -0.34479300 |
| H | 1.43798500  | 2.76125200  | -1.66934700 |
| F | 2.59596900  | -1.73087500 | 1.67875100  |
| C | 0.67385200  | 3.27273300  | 0.27802100  |
| H | 1.18821200  | 4.23668700  | 0.22164300  |
| H | 0.77428900  | 2.91806600  | 1.31250100  |

**(R)-TS2<sub>G</sub>-F-P**

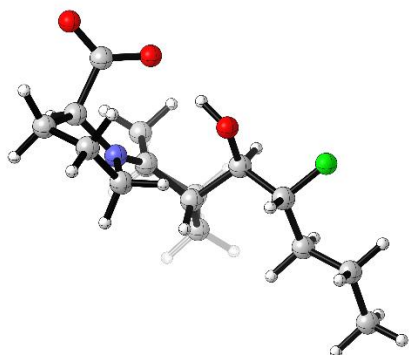

-----  
 - Thermochemistry -  
 -----

|                                              |                             |
|----------------------------------------------|-----------------------------|
| Zero-point correction=                       | 0.415141 (Hartree/Particle) |
| Thermal correction to Energy=                | 0.432677                    |
| Thermal correction to Enthalpy=              | 0.433542                    |
| Thermal correction to Gibbs Free Energy=     | 0.371357                    |
| Sum of electronic and zero-point Energies=   | -1004.869691                |
| Sum of electronic and thermal Energies=      | -1004.852154                |
| Sum of electronic and thermal Enthalpies=    | -1004.851289                |
| Sum of electronic and thermal Free Energies= | -1004.913474                |

Number of Imaginary Frequencies = 0

E (Single Point Energy) [IEFPCM(DCM)M06-2X/6-311++G(2d,2p)] = -1005.559850

|   |             |             |             |
|---|-------------|-------------|-------------|
| C | 0.60192900  | 0.58886300  | -0.58080000 |
| H | 0.77552600  | -0.10664900 | -1.40748700 |
| C | -0.88292500 | 0.80297500  | -0.41811100 |
| N | -1.72170800 | -0.08617600 | -0.83133400 |
| C | -3.17177700 | -0.07086500 | -0.52538700 |
| H | -3.59488500 | 0.90236600  | -0.77648300 |
| C | -1.34942500 | -1.36002000 | -1.51762700 |
| H | -0.48288400 | -1.79629600 | -1.02518800 |
| H | -1.11687600 | -1.11926700 | -2.55954100 |
| C | -2.60533700 | -2.21817400 | -1.39623700 |
| H | -2.59210400 | -2.76083800 | -0.44600200 |
| H | -2.67155800 | -2.94261500 | -2.20882600 |
| C | -3.73381300 | -1.18784000 | -1.40366700 |
| H | -3.91049700 | -0.81844000 | -2.41872800 |
| H | -4.67333200 | -1.55817200 | -0.99399000 |
| C | -1.33165100 | 2.00571000  | 0.35999800  |
| H | -2.41287600 | 2.12652300  | 0.32831700  |
| H | -1.07855900 | 1.78732500  | 1.40783700  |
| C | 1.09350600  | -0.10356700 | 0.74182000  |
| H | 1.28684100  | 0.67229000  | 1.49808800  |
| C | 2.37743600  | -0.91539100 | 0.54288400  |
| O | 0.17316900  | -1.05883000 | 1.21682600  |
| C | -3.41597700 | -0.33106500 | 1.00534400  |
| O | -2.40683600 | -0.42663800 | 1.75105200  |
| O | -4.61617500 | -0.39843500 | 1.31366700  |
| C | 3.57783100  | -0.26147200 | -0.11241000 |
| H | 3.32244800  | -0.02336500 | -1.15171000 |

|   |             |             |             |
|---|-------------|-------------|-------------|
| C | 4.80305600  | -1.17804500 | -0.10895600 |
| H | 5.08027600  | -1.40930200 | 0.92383900  |
| H | 4.53971900  | -2.13043600 | -0.58611400 |
| H | 2.10320200  | -1.83174300 | 0.00280300  |
| H | 3.81703400  | 0.68036600  | 0.39849900  |
| C | 5.98618200  | -0.54323700 | -0.83635300 |
| H | 5.73724300  | -0.33164300 | -1.88150900 |
| H | 6.85814000  | -1.20244200 | -0.82485200 |
| H | 6.27299600  | 0.40138800  | -0.36276100 |
| H | -0.70986800 | -0.69606800 | 1.46324400  |
| C | -0.61398100 | 3.28884000  | -0.07518000 |
| C | 1.30419500  | 1.92526800  | -0.91709400 |
| H | -0.91947100 | 3.55749100  | -1.09356300 |
| H | -0.93324100 | 4.10045700  | 0.58339600  |
| H | 2.38426900  | 1.79059600  | -0.88592800 |
| H | 1.05433900  | 2.17630500  | -1.95517800 |
| F | 2.76569900  | -1.32350200 | 1.82850000  |
| C | 0.89491200  | 3.09240400  | -0.02110800 |
| H | 1.41076600  | 3.99705400  | -0.35569500 |
| H | 1.20779500  | 2.91477800  | 1.01530300  |



(S)-TS2<sub>G</sub>-F-Pre

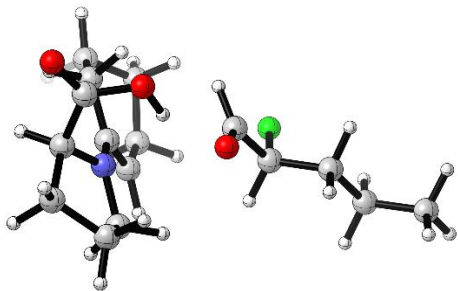

-----  
- Thermochemistry -  
-----

|                                              |                             |
|----------------------------------------------|-----------------------------|
| Zero-point correction=                       | 0.410432 (Hartree/Particle) |
| Thermal correction to Energy=                | 0.429731                    |
| Thermal correction to Enthalpy=              | 0.430596                    |
| Thermal correction to Gibbs Free Energy=     | 0.363048                    |
| Sum of electronic and zero-point Energies=   | -1004.855125                |
| Sum of electronic and thermal Energies=      | -1004.835826                |
| Sum of electronic and thermal Enthalpies=    | -1004.834961                |
| Sum of electronic and thermal Free Energies= | -1004.902509                |

Number of Imaginary Frequencies = 0

E (Single Point Energy) [IEFPCM<sub>(DCM)</sub>M06-2X/6-311++G(2d,2p)] = -1005.542429

|   |             |             |             |
|---|-------------|-------------|-------------|
| C | -0.15411400 | 1.48435100  | -1.35311400 |
| H | 0.19304400  | 0.87779500  | -2.18502400 |
| C | -1.15807500 | 1.02800500  | -0.57146900 |
| N | -1.67666200 | -0.26218000 | -0.70504000 |
| C | -3.02474300 | -0.61108900 | -0.26708300 |
| H | -3.74809500 | 0.19761100  | -0.40815300 |
| C | -1.22963700 | -1.12828600 | -1.79502400 |
| H | -0.15251300 | -1.30303800 | -1.71766400 |
| H | -1.43744400 | -0.66789000 | -2.77447500 |
| C | -2.05582000 | -2.39233100 | -1.58980600 |
| H | -1.60888400 | -3.00512800 | -0.79920900 |
| H | -2.12937700 | -2.99807200 | -2.49469100 |

|   |             |             |             |
|---|-------------|-------------|-------------|
| C | -3.40705100 | -1.82812000 | -1.14385600 |
| H | -3.96683000 | -1.46821500 | -2.01143300 |
| H | -4.03498500 | -2.54217400 | -0.60727300 |
| C | -1.70579800 | 1.84741100  | 0.57877900  |
| H | -2.79920900 | 1.79338900  | 0.59556900  |
| H | -1.36752300 | 1.40088700  | 1.52653200  |
| C | 0.21761600  | 3.42651400  | 0.20840800  |
| C | 1.24062400  | -0.30113600 | 0.79459300  |
| H | 0.89044700  | 0.51603300  | 1.45123300  |
| C | 2.54687500  | -0.05368200 | 0.07270800  |
| H | 2.37549400  | -0.09132100 | -1.01021200 |
| O | 0.64051200  | -1.35243200 | 0.70101900  |
| C | -3.08538800 | -0.98784600 | 1.21476300  |
| O | -1.94855100 | -1.36796100 | 1.79206900  |
| O | -4.12913500 | -0.98631000 | 1.83131700  |
| H | -1.18144800 | -1.28791700 | 1.18137400  |
| C | 3.62451900  | -1.03871300 | 0.49548000  |
| H | 3.23579600  | -2.04631700 | 0.30667800  |
| C | 4.93994900  | -0.82479900 | -0.25116500 |
| H | 4.76032400  | -0.92158500 | -1.32898100 |
| H | 3.78126400  | -0.94722400 | 1.57775300  |
| C | 6.00852600  | -1.82289800 | 0.18925400  |
| H | 6.94475300  | -1.66368700 | -0.35194000 |
| H | 6.21671400  | -1.72351000 | 1.25934500  |
| H | 5.68220800  | -2.85153300 | 0.00521300  |
| H | 5.29231500  | 0.19764800  | -0.07879700 |
| C | 0.52162000  | 2.82019200  | -1.16072400 |
| C | -1.27459900 | 3.31341700  | 0.50857700  |

|   |             |            |             |
|---|-------------|------------|-------------|
| H | 1.60431700  | 2.70126000 | -1.28558900 |
| H | 0.19879200  | 3.51546500 | -1.94942900 |
| H | -1.83979200 | 3.81852300 | -0.28522000 |
| H | -1.52715100 | 3.81010700 | 1.45012700  |
| H | 0.78648300  | 2.89093800 | 0.98031200  |
| H | 0.54118100  | 4.47161900 | 0.24030700  |
| F | 2.94412400  | 1.24769600 | 0.38575000  |

(S)-TS2<sub>G-F</sub>

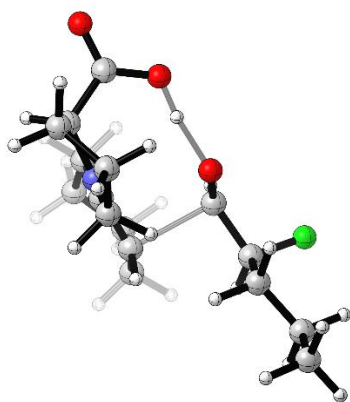

-----  
- Thermochemistry -  
-----

|                                              |                             |
|----------------------------------------------|-----------------------------|
| Zero-point correction=                       | 0.410676 (Hartree/Particle) |
| Thermal correction to Energy=                | 0.428420                    |
| Thermal correction to Enthalpy=              | 0.429285                    |
| Thermal correction to Gibbs Free Energy=     | 0.366632                    |
| Sum of electronic and zero-point Energies=   | -1004.845643                |
| Sum of electronic and thermal Energies=      | -1004.827898                |
| Sum of electronic and thermal Enthalpies=    | -1004.827033                |
| Sum of electronic and thermal Free Energies= | -1004.889686                |

Number of Imaginary Frequencies = 1

E (Single Point Energy) [IEFPCM(DCM)M06-2X/6-311++G(2d,2p)] = -1005.531600

|   |            |            |             |
|---|------------|------------|-------------|
| C | 0.28422100 | 1.27242500 | -1.02612100 |
| H | 0.91427500 | 0.61335000 | -1.61735400 |

|   |             |             |             |
|---|-------------|-------------|-------------|
| C | -1.00974000 | 0.85275400  | -0.74805300 |
| N | -1.35835600 | -0.44603700 | -0.82479700 |
| C | -2.67109600 | -0.97698600 | -0.44992700 |
| H | -3.48147200 | -0.40319900 | -0.90452400 |
| C | -0.50633100 | -1.47812800 | -1.44191400 |
| H | 0.51347500  | -1.40013900 | -1.07048800 |
| H | -0.50958300 | -1.34742600 | -2.53257800 |
| C | -1.17364700 | -2.78071700 | -1.01731100 |
| H | -0.83638200 | -3.05092200 | -0.01098000 |
| H | -0.94285200 | -3.60470900 | -1.69421800 |
| C | -2.65812100 | -2.41517700 | -1.00777000 |
| H | -3.05057100 | -2.40045600 | -2.02845800 |
| H | -3.27918900 | -3.08522600 | -0.41136600 |
| C | -2.01922900 | 1.81152800  | -0.15586600 |
| H | -3.02725400 | 1.53936000  | -0.47759600 |
| H | -2.00155500 | 1.69291800  | 0.93850700  |
| C | -0.28161300 | 3.62279100  | -0.24185100 |
| C | 0.96165300  | 0.47960900  | 0.97319000  |
| H | 0.57695800  | 1.38833700  | 1.45976200  |
| C | 2.45993200  | 0.52136700  | 0.68025000  |
| H | 2.73398700  | 1.42314600  | 0.12733600  |
| O | 0.42115700  | -0.63009300 | 1.19834300  |
| C | -2.95702200 | -0.97954900 | 1.06050500  |
| O | -1.95969200 | -0.87431500 | 1.90807900  |
| O | -4.10781700 | -1.11229800 | 1.43488500  |
| H | -1.00421000 | -0.75456200 | 1.52727500  |
| C | 3.02702400  | -0.72405600 | 0.03603200  |
| H | 2.60270000  | -0.81188600 | -0.97206200 |

|   |             |             |             |
|---|-------------|-------------|-------------|
| C | 4.55218700  | -0.69039000 | -0.06491800 |
| H | 4.85931000  | 0.20438300  | -0.62092700 |
| H | 2.69471100  | -1.59962400 | 0.60483200  |
| C | 5.10198300  | -1.93926800 | -0.75061200 |
| H | 6.19288400  | -1.90926300 | -0.81505500 |
| H | 4.82192200  | -2.84146200 | -0.19720900 |
| H | 4.70645100  | -2.03419700 | -1.76730100 |
| H | 4.97843600  | -0.59955200 | 0.93925400  |
| C | 0.64183200  | 2.74389400  | -1.08505100 |
| C | -1.73694400 | 3.26872500  | -0.52298100 |
| H | 1.68186400  | 2.89453300  | -0.77507500 |
| H | 0.59760000  | 3.07784500  | -2.13115400 |
| H | -1.95078900 | 3.42191100  | -1.58811800 |
| H | -2.41598200 | 3.91562600  | 0.03937800  |
| H | -0.07313200 | 3.48061900  | 0.82630400  |
| H | -0.09038100 | 4.67699200  | -0.46320100 |
| F | 3.04194900  | 0.67073200  | 1.95916900  |

(S)-TS2<sub>G</sub>-F-P

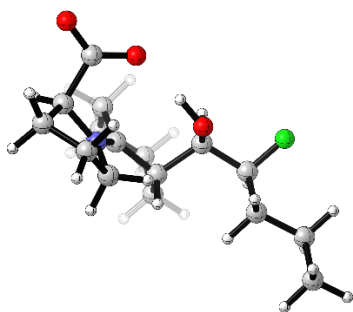

-----  
 - Thermochemistry -  
 -----

Zero-point correction=  
 Thermal correction to Energy=

0.415255 (Hartree/Particle)  
 0.432945

|                                              |              |
|----------------------------------------------|--------------|
| Thermal correction to Enthalpy=              | 0.433810     |
| Thermal correction to Gibbs Free Energy=     | 0.370935     |
| Sum of electronic and zero-point Energies=   | -1004.874756 |
| Sum of electronic and thermal Energies=      | -1004.857066 |
| Sum of electronic and thermal Enthalpies=    | -1004.856201 |
| Sum of electronic and thermal Free Energies= | -1004.919076 |

Number of Imaginary Frequencies = 0

E (Single Point Energy) [IEFPCM<sub>(DCM)</sub>M06-2X/6-311++G(2d,2p)] = -1005.564970

|   |             |             |             |
|---|-------------|-------------|-------------|
| C | 0.53459300  | 0.79357500  | -0.70059700 |
| H | 0.82562400  | -0.00447800 | -1.38553400 |
| C | -0.96108900 | 0.80227000  | -0.53835800 |
| N | -1.65908600 | -0.24830600 | -0.81256600 |
| C | -3.06582500 | -0.43561600 | -0.39218400 |
| H | -3.66676300 | 0.42828300  | -0.67541200 |
| C | -1.12245000 | -1.51461800 | -1.40189100 |
| H | -0.17194700 | -1.76217400 | -0.93475300 |
| H | -0.98846600 | -1.34335400 | -2.47434700 |
| C | -2.21607300 | -2.54144200 | -1.11955300 |
| H | -2.05900300 | -2.98817300 | -0.13293800 |
| H | -2.21399900 | -3.33812100 | -1.86445900 |
| C | -3.49517800 | -1.70490200 | -1.12580900 |
| H | -3.79415100 | -1.46534700 | -2.15116000 |
| H | -4.33432200 | -2.17651600 | -0.61461900 |
| C | -1.57274600 | 2.02061400  | 0.09124400  |
| H | -2.65971300 | 2.00230900  | 0.02848800  |
| H | -1.32565400 | 1.96546700  | 1.16032300  |
| C | 0.50962500  | 3.34250000  | -0.49465300 |
| C | 1.08265600  | 0.41300700  | 0.71762900  |
| H | 0.81160000  | 1.20051900  | 1.43501000  |
| C | 2.60695000  | 0.31736100  | 0.73018600  |

|   |             |             |             |
|---|-------------|-------------|-------------|
| H | 3.04548500  | 1.28153500  | 0.45001800  |
| O | 0.56632100  | -0.82619000 | 1.13261600  |
| C | -3.13518500 | -0.59946800 | 1.16977000  |
| O | -2.05571600 | -0.52169900 | 1.81390900  |
| O | -4.28292000 | -0.78689600 | 1.60196800  |
| H | -0.36884400 | -0.72500300 | 1.43034300  |
| C | 3.18529300  | -0.80441100 | -0.11015800 |
| H | 2.93049200  | -0.61487800 | -1.16148600 |
| C | 4.70404100  | -0.91871500 | 0.02100800  |
| H | 5.16367900  | 0.04024300  | -0.25037600 |
| H | 2.70261700  | -1.74521700 | 0.17841900  |
| C | 5.26873200  | -2.03083800 | -0.86006300 |
| H | 6.35434100  | -2.10766300 | -0.75646800 |
| H | 4.83545200  | -2.99899500 | -0.58868500 |
| H | 5.04277000  | -1.84732800 | -1.91578200 |
| H | 4.96183700  | -1.10685000 | 1.06804700  |
| C | 1.04550900  | 2.13436900  | -1.26110300 |
| C | -1.01672400 | 3.32344000  | -0.50554800 |
| H | 2.13848000  | 2.12686600  | -1.28396300 |
| H | 0.71974200  | 2.20641200  | -2.30592700 |
| H | -1.37562500 | 3.43146900  | -1.53620300 |
| H | -1.42455000 | 4.16084300  | 0.06608800  |
| H | 0.87739100  | 3.34240200  | 0.53887000  |
| H | 0.87581000  | 4.26205300  | -0.95998500 |
| F | 2.97522800  | 0.11215200  | 2.06855400  |

(R)-TS2<sub>o</sub>-F-Pre

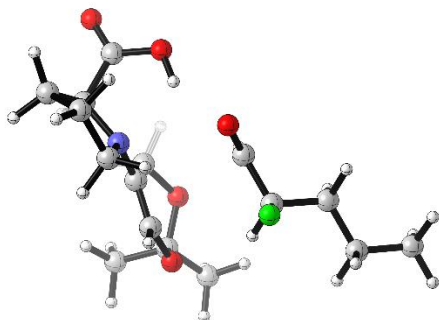

-----  
- Thermochemistry -  
-----

|                                              |                             |
|----------------------------------------------|-----------------------------|
| Zero-point correction=                       | 0.418212 (Hartree/Particle) |
| Thermal correction to Energy=                | 0.439452                    |
| Thermal correction to Enthalpy=              | 0.440317                    |
| Thermal correction to Gibbs Free Energy=     | 0.368522                    |
| Sum of electronic and zero-point Energies=   | -1155.234053                |
| Sum of electronic and thermal Energies=      | -1155.212813                |
| Sum of electronic and thermal Enthalpies=    | -1155.211948                |
| Sum of electronic and thermal Free Energies= | -1155.283743                |

Number of Imaginary Frequencies = 0

E (Single Point Energy) [IEFPCM(DCM)M06-2X/6-311++G(2d,2p)] = -1155.977111

|   |             |             |             |
|---|-------------|-------------|-------------|
| C | 0.00221100  | 1.04271500  | 1.30629100  |
| H | -0.08023000 | 0.53402500  | 2.25870400  |
| C | 0.96054200  | 0.79872200  | 0.39391400  |
| N | 1.93688400  | -0.18493000 | 0.55474000  |
| C | 3.23481000  | -0.06282800 | -0.10705000 |
| H | 3.50327200  | 0.97366900  | -0.33689800 |
| C | 2.05596400  | -0.86240700 | 1.84700800  |
| H | 1.18084500  | -1.49796100 | 2.01750500  |
| H | 2.12065600  | -0.12675400 | 2.66527900  |
| C | 3.35908000  | -1.64282200 | 1.70916600  |
| H | 3.18667300  | -2.57085800 | 1.15345700  |
| H | 3.79557600  | -1.89775800 | 2.67612100  |



|   |             |             |             |
|---|-------------|-------------|-------------|
| C | 4.23158400  | -0.67846300 | 0.89992600  |
| H | 4.61031700  | 0.11715600  | 1.54759700  |
| H | 5.08032300  | -1.15041600 | 0.40198300  |
| C | 0.89899900  | 1.51557300  | -0.93251300 |
| H | 1.66212000  | 2.30245500  | -1.01386200 |
| H | 1.05931400  | 0.81248200  | -1.75746200 |
| O | -1.03763300 | 1.91903700  | 1.09715000  |
| O | -0.39887600 | 2.05227100  | -1.12990900 |
| C | -0.88797900 | 2.79102900  | -0.02493100 |
| C | -2.28102800 | 3.24656500  | -0.40000300 |
| H | -2.87735300 | 2.38140600  | -0.70085800 |
| H | -2.22853400 | 3.95529500  | -1.22902200 |
| C | 0.03322200  | 3.94731500  | 0.34876600  |
| H | -0.46204500 | 4.57204900  | 1.09481400  |
| H | 0.24429500  | 4.55064300  | -0.53791900 |
| H | 0.97425000  | 3.59087400  | 0.77416200  |
| C | -0.97613700 | -1.25112400 | -0.52540300 |
| H | -0.87769700 | -0.54864800 | -1.37466200 |
| C | -2.25355600 | -1.09814600 | 0.26005500  |
| O | -0.13402700 | -2.09384200 | -0.29463500 |
| C | 3.28356600  | -0.82752800 | -1.43519600 |
| O | 2.28679100  | -1.66984300 | -1.69058400 |
| O | 4.20475300  | -0.69125900 | -2.21055200 |
| H | -2.75360000 | 3.73001200  | 0.45725800  |
| C | -3.46045600 | -1.49570500 | -0.58062800 |
| H | -3.43826300 | -0.91247100 | -1.51015600 |
| C | -4.78091100 | -1.25473700 | 0.15005500  |
| H | -4.77783900 | -1.81207600 | 1.09265600  |

|   |             |             |             |
|---|-------------|-------------|-------------|
| H | -4.85652300 | -0.19134000 | 0.40897400  |
| H | -3.36208800 | -2.55314600 | -0.85636800 |
| C | -5.98143100 | -1.67140500 | -0.69639500 |
| H | -6.01224000 | -1.10914000 | -1.63530800 |
| H | -5.93190800 | -2.73639800 | -0.94468100 |
| H | -6.91999300 | -1.49301000 | -0.16529000 |
| H | 1.60799100  | -1.66076600 | -0.97740600 |
| H | -2.33557500 | -0.05093700 | 0.58360600  |
| F | -2.18543100 | -1.89170100 | 1.39716200  |

(R)-TS2<sub>o</sub>-F

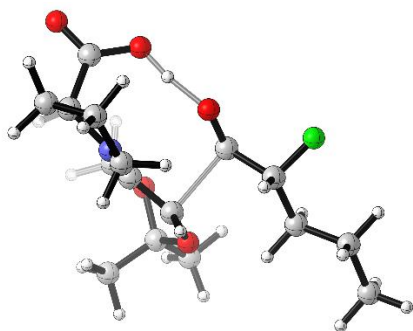

-----  
 - Thermochemistry -  
 -----

|                                              |                             |
|----------------------------------------------|-----------------------------|
| Zero-point correction=                       | 0.417192 (Hartree/Particle) |
| Thermal correction to Energy=                | 0.436878                    |
| Thermal correction to Enthalpy=              | 0.437743                    |
| Thermal correction to Gibbs Free Energy=     | 0.371067                    |
| Sum of electronic and zero-point Energies=   | -1155.218820                |
| Sum of electronic and thermal Energies=      | -1155.199133                |
| Sum of electronic and thermal Enthalpies=    | -1155.198268                |
| Sum of electronic and thermal Free Energies= | -1155.264945                |

Number of Imaginary Frequencies = 1

E (Single Point Energy) [IEFPCM<sub>(DCM)</sub>M06-2X/6-311++G(2d,2p)] = -1155.958868

|   |             |             |             |
|---|-------------|-------------|-------------|
| C | -0.53501600 | 0.50533100  | 0.77410600  |
| H | -0.77827000 | -0.10096400 | 1.64194000  |
| C | 0.78928600  | 0.74849300  | 0.42600600  |
| N | 1.77377500  | -0.07480600 | 0.78241900  |
| C | 3.16333700  | 0.06784600  | 0.33747800  |
| H | 3.47792300  | 1.11490300  | 0.37159900  |
| C | 1.61958300  | -1.11717700 | 1.81542700  |
| H | 0.75974000  | -1.74807100 | 1.58927300  |
| H | 1.47547000  | -0.63224300 | 2.78981500  |
| C | 2.94269600  | -1.87297700 | 1.73816600  |
| H | 2.88764500  | -2.63153400 | 0.95036100  |
| H | 3.18809800  | -2.36747200 | 2.67876500  |
| C | 3.94332000  | -0.77819400 | 1.35941000  |
| H | 4.17733200  | -0.15970600 | 2.23053300  |
| H | 4.87613000  | -1.15294500 | 0.93734200  |
| C | 1.08929600  | 1.85577300  | -0.55447600 |
| H | 1.74593100  | 2.60122000  | -0.08229900 |
| H | 1.60390700  | 1.45823800  | -1.43533100 |
| O | -1.51918100 | 1.43351400  | 0.48422500  |
| O | -0.09992600 | 2.44286200  | -1.03281500 |
| C | -1.07019900 | 2.68647100  | -0.03032900 |
| C | -2.25855200 | 3.31017200  | -0.72724800 |
| H | -2.56834300 | 2.66893000  | -1.55531900 |
| H | -1.98678600 | 4.29528500  | -1.11185700 |
| C | -0.52702000 | 3.55185600  | 1.10267100  |
| H | -1.35206500 | 3.83810100  | 1.75784200  |
| H | -0.07089300 | 4.45517400  | 0.68945000  |
| H | 0.21531600  | 3.02322700  | 1.70599300  |

|   |             |             |             |
|---|-------------|-------------|-------------|
| C | -0.69447700 | -0.99404200 | -0.73662100 |
| H | -0.90270000 | -0.21367400 | -1.48637800 |
| C | -1.92000000 | -1.74149000 | -0.20178300 |
| O | 0.36085400  | -1.69190800 | -0.81290300 |
| C | 3.44092900  | -0.40749800 | -1.10425600 |
| O | 2.49974600  | -1.00486900 | -1.78515000 |
| O | 4.55021000  | -0.19533400 | -1.56159800 |
| H | -3.08504500 | 3.41463500  | -0.02163900 |
| C | -3.21249400 | -0.96886300 | -0.04175800 |
| H | -3.09155000 | -0.23139400 | 0.75660500  |
| C | -4.39769200 | -1.88050600 | 0.28065900  |
| H | -4.53802400 | -2.60125300 | -0.53063300 |
| H | -4.16975000 | -2.46217700 | 1.18311800  |
| H | -3.40842700 | -0.40345100 | -0.96249100 |
| C | -5.68192800 | -1.08144800 | 0.49235900  |
| H | -5.57218300 | -0.37489500 | 1.32166700  |
| H | -5.93418100 | -0.50659800 | -0.40480800 |
| H | -6.52607600 | -1.73843400 | 0.71845400  |
| H | 1.57453500  | -1.23086200 | -1.31472100 |
| H | -1.63965300 | -2.27043000 | 0.71750200  |
| F | -2.13939300 | -2.74406300 | -1.16940600 |

(R)-TS2<sub>o</sub>-F-P

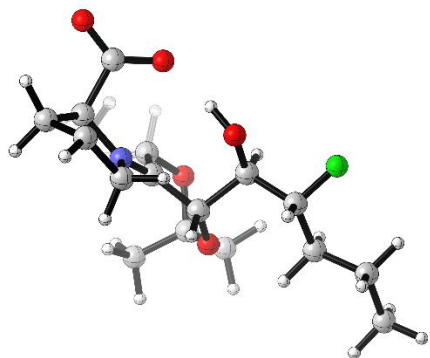

-----  
- Thermochemistry -  
-----

|                                              |                             |
|----------------------------------------------|-----------------------------|
| Zero-point correction=                       | 0.421340 (Hartree/Particle) |
| Thermal correction to Energy=                | 0.441228                    |
| Thermal correction to Enthalpy=              | 0.442093                    |
| Thermal correction to Gibbs Free Energy=     | 0.374432                    |
| Sum of electronic and zero-point Energies=   | -1155.249207                |
| Sum of electronic and thermal Energies=      | -1155.229319                |
| Sum of electronic and thermal Enthalpies=    | -1155.228454                |
| Sum of electronic and thermal Free Energies= | -1155.296115                |

Number of Imaginary Frequencies = 0

E (Single Point Energy) [IEFPCM<sub>(DCM)</sub>M06-2X/6-311++G(2d,2p)] = -1155.987905

|   |             |             |             |
|---|-------------|-------------|-------------|
| C | -0.30733000 | 0.68729300  | 0.73125200  |
| H | -0.35126700 | 0.31882900  | 1.75863800  |
| C | 1.09009900  | 0.64137000  | 0.19238700  |
| N | 1.94855600  | -0.21250100 | 0.61963900  |
| C | 3.19791300  | -0.52479100 | -0.10052300 |
| H | 3.68180200  | 0.39735800  | -0.43089700 |
| C | 1.77370000  | -1.11996900 | 1.79636400  |
| H | 0.79255200  | -1.58883100 | 1.75325800  |
| H | 1.86236600  | -0.49918300 | 2.69275200  |
| C | 2.93389800  | -2.10519300 | 1.66160800  |
| H | 2.62640400  | -2.96082200 | 1.05293700  |

|   |             |             |             |
|---|-------------|-------------|-------------|
| H | 3.25454000  | -2.47275200 | 2.63678600  |
| C | 4.01203100  | -1.29794400 | 0.93390700  |
| H | 4.50862400  | -0.60561900 | 1.62064300  |
| H | 4.76422800  | -1.91468300 | 0.44308300  |
| C | 1.38722300  | 1.52920100  | -0.98522400 |
| H | 2.30344400  | 2.10691900  | -0.80087900 |
| H | 1.53947400  | 0.90485200  | -1.87174400 |
| O | -0.89810800 | 1.96946500  | 0.70804600  |
| O | 0.28475300  | 2.36496300  | -1.24781600 |
| C | -0.27086400 | 2.97404200  | -0.09512000 |
| C | -1.37446700 | 3.88593700  | -0.58355200 |
| H | -1.92683400 | 4.28249200  | 0.27036000  |
| H | -0.94762000 | 4.71432600  | -1.15272800 |
| C | 0.77469400  | 3.70955200  | 0.73830100  |
| H | 0.26416300  | 4.27258100  | 1.52171800  |
| H | 1.33724400  | 4.40368500  | 0.10860200  |
| H | 1.47497000  | 3.02657200  | 1.22805000  |
| C | -1.13370800 | -0.28499000 | -0.18558500 |
| H | -1.15708000 | 0.15683800  | -1.19362000 |
| C | -2.56701100 | -0.34055700 | 0.32596000  |
| O | -0.58892200 | -1.57254600 | -0.18279700 |
| C | 2.87393300  | -1.39414800 | -1.37797600 |
| O | 1.66087100  | -1.55773800 | -1.67552800 |
| O | 3.88129900  | -1.80836300 | -1.96517900 |
| H | -2.05457900 | 3.31735800  | -1.22156600 |
| C | -3.44458100 | -1.30111200 | -0.44922100 |
| H | -3.40125600 | -1.01708600 | -1.50886900 |
| C | -4.89526300 | -1.29464700 | 0.03119200  |

|   |             |             |             |
|---|-------------|-------------|-------------|
| H | -4.92321000 | -1.54752900 | 1.09669000  |
| H | -5.30446800 | -0.28096800 | -0.06399100 |
| H | -3.01540300 | -2.30550100 | -0.36777800 |
| C | -5.76028400 | -2.27682600 | -0.75589000 |
| H | -5.76183400 | -2.02840900 | -1.82234100 |
| H | -5.38099200 | -3.29854200 | -0.65177300 |
| H | -6.79583100 | -2.26466400 | -0.40538000 |
| H | 0.21117300  | -1.60662400 | -0.76154000 |
| H | -2.98579200 | 0.67123500  | 0.32902600  |
| F | -2.52374900 | -0.75376700 | 1.67133500  |

(S)-TS2<sub>0</sub>-F-Pre

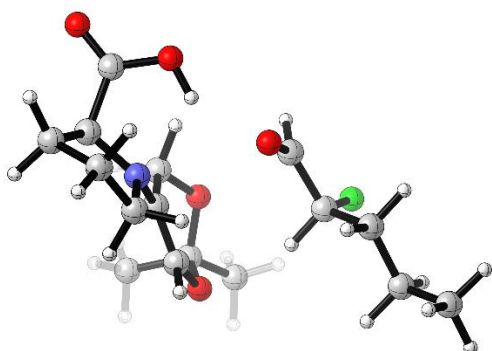

-----  
 - Thermochemistry -  
 -----

|                                              |                             |
|----------------------------------------------|-----------------------------|
| Zero-point correction=                       | 0.418091 (Hartree/Particle) |
| Thermal correction to Energy=                | 0.439372                    |
| Thermal correction to Enthalpy=              | 0.440237                    |
| Thermal correction to Gibbs Free Energy=     | 0.368391                    |
| Sum of electronic and zero-point Energies=   | -1155.232740                |
| Sum of electronic and thermal Energies=      | -1155.211459                |
| Sum of electronic and thermal Enthalpies=    | -1155.210594                |
| Sum of electronic and thermal Free Energies= | -1155.282440                |

Number of Imaginary Frequencies = 0

E (Single Point Energy) [IEFPCM(DCM)M06-2X/6-311++G(2d,2p)] = -1155.975450

|   |             |             |             |
|---|-------------|-------------|-------------|
| C | 0.06648800  | 0.85315900  | -1.46064900 |
| H | 0.18301600  | 0.27708700  | -2.36962200 |
| C | -0.91010200 | 0.66406000  | -0.55888400 |
| N | -1.87778100 | -0.34451800 | -0.66201000 |
| C | -3.23188200 | -0.10270800 | -0.15497300 |
| H | -3.47673500 | 0.96258400  | -0.08343400 |
| C | -1.91699200 | -1.15381000 | -1.88198000 |
| H | -1.04518900 | -1.81465600 | -1.91906900 |
| H | -1.90716600 | -0.51107500 | -2.77734800 |
| C | -3.24733100 | -1.88981800 | -1.76870000 |
| H | -3.15278300 | -2.74270400 | -1.08808700 |
| H | -3.60428500 | -2.25590600 | -2.73267800 |
| C | -4.15590700 | -0.81304700 | -1.16831700 |
| H | -4.44700300 | -0.09632100 | -1.94126700 |
| H | -5.06161800 | -1.19851700 | -0.69721000 |
| C | -0.88392900 | 1.46522000  | 0.71886100  |
| H | -1.64136700 | 2.26177800  | 0.73025100  |
| H | -1.07430900 | 0.81688700  | 1.58069900  |
| O | 1.09771800  | 1.74936600  | -1.28510900 |
| O | 0.41343800  | 2.00487400  | 0.91772000  |
| C | 0.92323500  | 2.68387800  | -0.21742200 |
| C | 2.30513400  | 3.16991800  | 0.16140500  |
| H | 2.79937300  | 3.59092400  | -0.71642500 |
| H | 2.22603500  | 3.93943900  | 0.93231400  |
| C | 0.00582100  | 3.81200100  | -0.67685700 |
| H | 0.52003400  | 4.39973200  | -1.44004800 |
| H | -0.23370700 | 4.46020300  | 0.17011400  |
| H | -0.92025100 | 3.42740000  | -1.11030800 |



|   |             |             |             |
|---|-------------|-------------|-------------|
| C | 1.10736600  | -0.95019700 | 1.41142500  |
| H | 0.92988600  | -0.43670300 | 2.37483100  |
| C | 2.42426600  | -0.63896300 | 0.73681100  |
| O | 0.28959100  | -1.70184600 | 0.92615600  |
| C | -3.43293200 | -0.69324600 | 1.24569500  |
| O | -2.45646100 | -1.46062700 | 1.72229400  |
| O | -4.44407400 | -0.49283200 | 1.88218600  |
| H | 2.89554200  | 2.33513800  | 0.54695100  |
| C | 3.14190700  | -1.86887200 | 0.21523100  |
| H | 3.36517000  | -2.53419200 | 1.05872500  |
| C | 4.42084800  | -1.52251000 | -0.54481200 |
| H | 4.17091500  | -0.85944800 | -1.38247100 |
| H | 5.09269800  | -0.96102200 | 0.11328300  |
| H | 2.43950100  | -2.39878000 | -0.43904200 |
| C | 5.12900900  | -2.77185000 | -1.06391900 |
| H | 5.40619300  | -3.43394000 | -0.23730400 |
| H | 4.47978900  | -3.33582000 | -1.74148800 |
| H | 6.04113200  | -2.51292900 | -1.60790700 |
| H | -1.70070800 | -1.48753400 | 1.09410400  |
| H | 2.22468500  | 0.07918300  | -0.07085100 |
| F | 3.21821500  | 0.02111600  | 1.68043100  |

(S)-TS2<sub>o</sub>-F

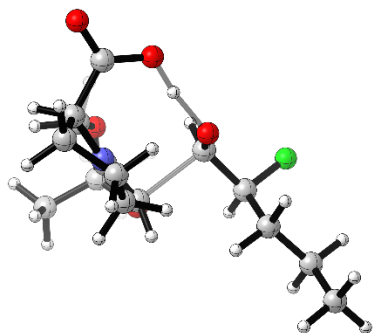

-----  
- Thermochemistry -  
-----

|                                              |                             |
|----------------------------------------------|-----------------------------|
| Zero-point correction=                       | 0.417489 (Hartree/Particle) |
| Thermal correction to Energy=                | 0.437086                    |
| Thermal correction to Enthalpy=              | 0.437951                    |
| Thermal correction to Gibbs Free Energy=     | 0.371738                    |
| Sum of electronic and zero-point Energies=   | -1155.222914                |
| Sum of electronic and thermal Energies=      | -1155.203318                |
| Sum of electronic and thermal Enthalpies=    | -1155.202453                |
| Sum of electronic and thermal Free Energies= | -1155.268666                |

Number of Imaginary Frequencies = 1

E (Single Point Energy) [IEFPCM(DCM)M06-2X/6-311++G(2d,2p)] = -1155.963577

|   |             |             |             |
|---|-------------|-------------|-------------|
| C | 0.44378400  | 0.85084500  | -0.77208200 |
| H | 0.96887400  | 0.24542400  | -1.50340000 |
| C | -0.90285700 | 0.64028600  | -0.50408100 |
| N | -1.49683500 | -0.52654900 | -0.75546200 |
| C | -2.86687800 | -0.85039000 | -0.35052300 |
| H | -3.53598800 | -0.00117700 | -0.51574000 |
| C | -0.90413200 | -1.56734000 | -1.61863700 |
| H | 0.09817200  | -1.82011400 | -1.27165900 |
| H | -0.85437800 | -1.18830900 | -2.64774800 |
| C | -1.88373300 | -2.72989900 | -1.47784800 |
| H | -1.62372200 | -3.32684600 | -0.59747500 |

|   |             |             |             |
|---|-------------|-------------|-------------|
| H | -1.87333100 | -3.38196600 | -2.35204800 |
| C | -3.22890100 | -2.02902900 | -1.27047200 |
| H | -3.60440000 | -1.63759100 | -2.22022700 |
| H | -3.99721600 | -2.66186500 | -0.82549400 |
| C | -1.65504100 | 1.69210700  | 0.27282400  |
| H | -2.48235100 | 2.08302700  | -0.33746700 |
| H | -2.07945200 | 1.26519400  | 1.18763000  |
| O | 1.02321400  | 2.09339100  | -0.60075500 |
| O | -0.78732900 | 2.72214900  | 0.69225800  |
| C | 0.12228700  | 3.16218300  | -0.30017400 |
| C | 0.95183900  | 4.25549300  | 0.33406200  |
| H | 1.74874100  | 4.55540100  | -0.34913500 |
| H | 0.31987500  | 5.11913000  | 0.55066700  |
| C | -0.58465600 | 3.61732500  | -1.57266200 |
| H | 0.14461500  | 4.08572200  | -2.23639700 |
| H | -1.35816100 | 4.34761000  | -1.32173900 |
| H | -1.04391100 | 2.78395700  | -2.11019400 |
| C | 0.94706400  | -0.18601100 | 1.00197600  |
| H | 0.63126900  | 0.66717700  | 1.62458100  |
| C | 2.45082700  | -0.20038500 | 0.73416500  |
| O | 0.34173900  | -1.29640700 | 1.09411700  |
| C | -3.02991900 | -1.23626700 | 1.13466900  |
| O | -1.97308200 | -1.38644900 | 1.88711400  |
| O | -4.16370000 | -1.38652600 | 1.55589200  |
| H | 1.39050800  | 3.88403200  | 1.26252900  |
| C | 2.93994100  | -1.40593800 | -0.03769900 |
| H | 2.60986200  | -2.31034400 | 0.48513800  |
| C | 4.45716200  | -1.41077400 | -0.22205200 |

|   |             |             |             |
|---|-------------|-------------|-------------|
| H | 4.76219600  | -0.49596600 | -0.74545400 |
| H | 4.93863700  | -1.38721100 | 0.76122200  |
| H | 2.45265700  | -1.41254300 | -1.02153000 |
| C | 4.93173100  | -2.63538700 | -1.00126500 |
| H | 4.65521200  | -3.55808300 | -0.48085900 |
| H | 4.47877200  | -2.66491100 | -1.99786100 |
| H | 6.01793600  | -2.63144200 | -1.12511900 |
| H | -0.99613800 | -1.30785700 | 1.46738500  |
| H | 2.77290300  | 0.74392800  | 0.28602800  |
| F | 3.03098000  | -0.23096800 | 2.02137700  |

(S)-TS2<sub>o</sub>-F-P

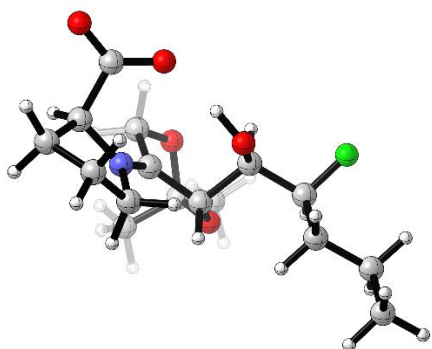

-----  
- Thermochemistry -  
-----

|                                              |                             |
|----------------------------------------------|-----------------------------|
| Zero-point correction=                       | 0.421309 (Hartree/Particle) |
| Thermal correction to Energy=                | 0.441246                    |
| Thermal correction to Enthalpy=              | 0.442111                    |
| Thermal correction to Gibbs Free Energy=     | 0.373799                    |
| Sum of electronic and zero-point Energies=   | -1155.246602                |
| Sum of electronic and thermal Energies=      | -1155.226664                |
| Sum of electronic and thermal Enthalpies=    | -1155.225799                |
| Sum of electronic and thermal Free Energies= | -1155.294111                |

Number of Imaginary Frequencies = 0

E (Single Point Energy) [IEFPCM(DCM)M06-2X/6-311++G(2d,2p)] = -1155.990832

|   |             |             |             |
|---|-------------|-------------|-------------|
| C | 0.52673700  | 0.52889100  | -0.50086700 |
| H | 0.78759500  | -0.07684300 | -1.37282300 |
| C | -0.96307700 | 0.59825400  | -0.32965500 |
| N | -1.73365100 | -0.34143600 | -0.74335800 |
| C | -3.13474100 | -0.48414100 | -0.30219100 |
| H | -3.63943300 | 0.48441800  | -0.33088000 |
| C | -1.32483800 | -1.50394200 | -1.59227200 |
| H | -0.40786400 | -1.93857900 | -1.19898500 |
| H | -1.16406700 | -1.11837800 | -2.60356100 |
| C | -2.52953000 | -2.44112300 | -1.51737200 |
| H | -2.41950600 | -3.11983200 | -0.66625500 |
| H | -2.62229800 | -3.03779700 | -2.42522700 |
| C | -3.71123200 | -1.49484900 | -1.29022200 |
| H | -3.99568500 | -0.99674100 | -2.22210900 |
| H | -4.58742400 | -1.98377100 | -0.86560100 |
| C | -1.49166400 | 1.74331000  | 0.49061000  |
| H | -2.31734200 | 2.23707600  | -0.03989500 |
| H | -1.86959200 | 1.35387500  | 1.44182300  |
| O | 1.15351700  | 1.78527800  | -0.64643500 |
| O | -0.45085600 | 2.64336500  | 0.79010300  |
| C | 0.38884200  | 2.94834500  | -0.30911400 |
| C | 1.37675000  | 3.98402400  | 0.17931500  |
| H | 2.13246700  | 4.15997100  | -0.58851800 |
| H | 0.85702500  | 4.92000100  | 0.39414000  |
| C | -0.39460800 | 3.41270400  | -1.53353000 |
| H | 0.31194300  | 3.76292600  | -2.28812900 |
| H | -1.06376000 | 4.23356600  | -1.26302600 |
| H | -0.98407200 | 2.60817500  | -1.98303900 |

|   |             |             |             |
|---|-------------|-------------|-------------|
| C | 1.04333300  | -0.17576600 | 0.80444000  |
| H | 0.80062900  | 0.48669400  | 1.64856200  |
| C | 2.56298400  | -0.30814300 | 0.75440700  |
| O | 0.46997700  | -1.44273000 | 0.95405200  |
| C | -3.17252300 | -1.01400300 | 1.18576600  |
| O | -2.07716600 | -1.08550100 | 1.80245900  |
| O | -4.31178900 | -1.28456900 | 1.58589100  |
| H | 1.86123400  | 3.61889800  | 1.08737600  |
| C | 3.07885200  | -1.38441200 | -0.18007600 |
| H | 2.64422500  | -2.34423300 | 0.11981100  |
| C | 4.60535100  | -1.46737300 | -0.19434700 |
| H | 5.01798300  | -0.49433300 | -0.48913800 |
| H | 4.96411300  | -1.66817200 | 0.82056500  |
| H | 2.72082200  | -1.16935300 | -1.19575600 |
| C | 5.10831400  | -2.55159000 | -1.14486200 |
| H | 4.72488200  | -3.53420300 | -0.85140600 |
| H | 4.77843200  | -2.35654800 | -2.17075500 |
| H | 6.20035200  | -2.60358000 | -1.14668600 |
| H | -0.44207100 | -1.35705700 | 1.32172500  |
| H | 3.00005000  | 0.66783300  | 0.52024200  |
| F | 2.97375000  | -0.62353500 | 2.06025800  |

(R)-TS2<sub>T</sub>-F-Pre

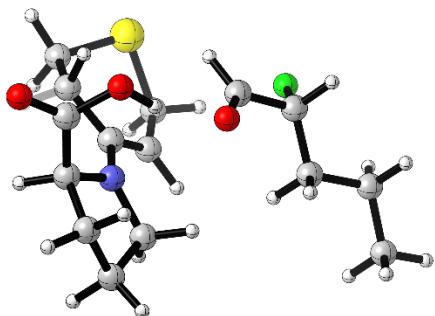

-----  
- Thermochemistry -  
-----

|                                              |                             |
|----------------------------------------------|-----------------------------|
| Zero-point correction=                       | 0.383025 (Hartree/Particle) |
| Thermal correction to Energy=                | 0.402527                    |
| Thermal correction to Enthalpy=              | 0.403392                    |
| Thermal correction to Gibbs Free Energy=     | 0.335876                    |
| Sum of electronic and zero-point Energies=   | -1363.738883                |
| Sum of electronic and thermal Energies=      | -1363.719381                |
| Sum of electronic and thermal Enthalpies=    | -1363.718516                |
| Sum of electronic and thermal Free Energies= | -1363.786031                |

Number of Imaginary Frequencies = 0

E (Single Point Energy) [IEFPCM<sub>(DCM)</sub>M06-2X/6-311++G(2d,2p)] = -1364.422147

|   |             |             |            |
|---|-------------|-------------|------------|
| C | -0.25200600 | 1.00649200  | 1.23364700 |
| H | -0.93651700 | 0.26620600  | 1.63475100 |
| C | 0.95936600  | 0.60619500  | 0.77653100 |
| N | 1.30224400  | -0.73878700 | 0.71542100 |
| C | 2.63668600  | -1.22780000 | 0.39583200 |
| H | 3.40773400  | -0.85535100 | 1.08323300 |
| C | 0.50933700  | -1.74357400 | 1.43400300 |
| H | -0.35627500 | -2.04622200 | 0.83015500 |
| H | 0.13964900  | -1.32852200 | 2.37809800 |
| C | 1.48663400  | -2.89591800 | 1.67528000 |
| H | 0.99156800  | -3.86846700 | 1.68721300 |

|   |             |             |             |
|---|-------------|-------------|-------------|
| H | 1.99466400  | -2.75636000 | 2.63439500  |
| C | 2.48955600  | -2.75593200 | 0.53223500  |
| H | 3.45127500  | -3.23508000 | 0.72022600  |
| H | 2.06814000  | -3.16742500 | -0.39202000 |
| C | 1.99498800  | 1.56698900  | 0.22656600  |
| H | 2.98228800  | 1.29270500  | 0.61761200  |
| H | 2.04580800  | 1.46286900  | -0.86497200 |
| C | -1.10073800 | 0.04495200  | -1.49278100 |
| H | -0.61659900 | 1.02947800  | -1.61358200 |
| C | -2.59777700 | 0.06331900  | -1.27076700 |
| O | -0.48681800 | -0.99999500 | -1.60544900 |
| C | 3.11447600  | -0.90941200 | -1.01700100 |
| O | 2.19585500  | -0.86449400 | -1.97683300 |
| O | 4.29083300  | -0.76947100 | -1.27266300 |
| C | -3.10155000 | -0.97710700 | -0.29128400 |
| H | -2.69107700 | -1.94498000 | -0.60276000 |
| C | -4.62658700 | -1.03880700 | -0.22500100 |
| H | -5.01762900 | -0.05217100 | 0.04620100  |
| H | -5.02016300 | -1.27327600 | -1.22162600 |
| H | -3.06950600 | -0.06997200 | -2.25525900 |
| H | -2.68699700 | -0.75258300 | 0.69917400  |
| C | -5.10777400 | -2.08178200 | 0.78111600  |
| H | -4.74380100 | -1.84966600 | 1.78720800  |
| H | -6.19942700 | -2.12069700 | 0.81916400  |
| H | -4.74315300 | -3.07901600 | 0.51432300  |
| H | 1.26918400  | -0.95918400 | -1.64694100 |
| C | 1.74223400  | 3.02816100  | 0.57309300  |
| C | -0.76947800 | 2.41976000  | 1.28092400  |



|   |             |            |             |
|---|-------------|------------|-------------|
| H | 1.88157800  | 3.20673900 | 1.64397000  |
| H | 2.43816500  | 3.66878100 | 0.02864200  |
| H | -1.82735700 | 2.43105300 | 1.00644700  |
| H | -0.68816600 | 2.84508100 | 2.28866900  |
| S | 0.06149600  | 3.54044000 | 0.11633300  |
| F | -2.93735400 | 1.34655400 | -0.83626500 |

*(R)*-TS2<sub>T-F</sub>

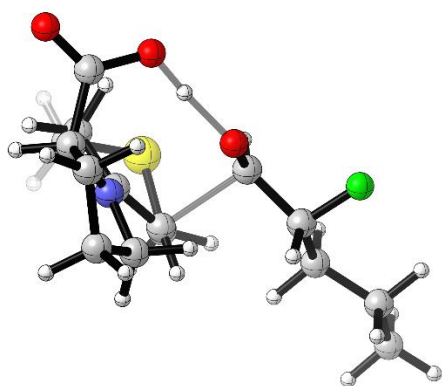

-----  
- Thermochemistry -  
-----

|                                              |                             |
|----------------------------------------------|-----------------------------|
| Zero-point correction=                       | 0.383288 (Hartree/Particle) |
| Thermal correction to Energy=                | 0.401144                    |
| Thermal correction to Enthalpy=              | 0.402009                    |
| Thermal correction to Gibbs Free Energy=     | 0.339298                    |
| Sum of electronic and zero-point Energies=   | -1363.724564                |
| Sum of electronic and thermal Energies=      | -1363.706709                |
| Sum of electronic and thermal Enthalpies=    | -1363.705844                |
| Sum of electronic and thermal Free Energies= | -1363.768554                |

Number of Imaginary Frequencies = 1

E (Single Point Energy) [IEFPCM(DCM)M06-2X/6-311++G(2d,2p)] = -1364.406058

|   |             |             |             |
|---|-------------|-------------|-------------|
| C | 0.50748500  | 0.70863200  | -0.90677700 |
| H | 0.90627800  | -0.07505100 | -1.54728800 |
| C | -0.87307200 | 0.70703700  | -0.69778800 |
| N | -1.57512300 | -0.42155500 | -0.86580600 |

|   |             |             |             |
|---|-------------|-------------|-------------|
| C | -2.97063400 | -0.62318000 | -0.45102200 |
| H | -3.64813400 | -0.02088900 | -1.06611900 |
| C | -1.06218900 | -1.57714700 | -1.62860900 |
| H | -0.34882900 | -2.13401500 | -1.01412800 |
| H | -0.56095900 | -1.22331300 | -2.53327700 |
| C | -2.31629900 | -2.39432200 | -1.92978500 |
| H | -2.09237100 | -3.45354800 | -2.06375400 |
| H | -2.79874700 | -2.02227800 | -2.83873400 |
| C | -3.20030600 | -2.12224000 | -0.71491900 |
| H | -4.25722600 | -2.33755900 | -0.87444200 |
| H | -2.84786600 | -2.70247900 | 0.14509100  |
| C | -1.61405700 | 1.87911200  | -0.09018800 |
| H | -2.63845500 | 1.88783400  | -0.47816400 |
| H | -1.68155800 | 1.73018000  | 0.99464900  |
| C | 0.90645800  | -0.40722500 | 0.95074200  |
| H | 1.06198500  | 0.55268800  | 1.46599600  |
| C | 2.16648100  | -1.19195800 | 0.56945300  |
| O | -0.08702300 | -1.13177700 | 1.22958400  |
| C | -3.29952700 | -0.30760200 | 1.01176200  |
| O | -2.37005700 | -0.47489500 | 1.92170400  |
| O | -4.43584200 | 0.02344100  | 1.29617200  |
| C | 3.37866600  | -0.44806100 | 0.05053200  |
| H | 3.15907000  | -0.08394800 | -0.95886300 |
| C | 4.62330900  | -1.33617300 | -0.01302600 |
| H | 4.87323800  | -1.68479100 | 0.99321800  |
| H | 4.39732100  | -2.22890500 | -0.60973500 |
| H | 1.87843800  | -2.00859600 | -0.10294800 |
| H | 3.57638800  | 0.42486600  | 0.68688900  |

|   |             |             |             |
|---|-------------|-------------|-------------|
| C | 5.81362900  | -0.59541600 | -0.61841700 |
| H | 6.06118700  | 0.29217900  | -0.02704700 |
| H | 6.70057700  | -1.23342000 | -0.65334700 |
| H | 5.59411100  | -0.26681700 | -1.63961100 |
| H | -1.41049000 | -0.71952300 | 1.58983600  |
| C | -0.97849000 | 3.23642900  | -0.35982000 |
| C | 1.31966400  | 1.98658700  | -0.93386000 |
| H | -1.00762100 | 3.48490700  | -1.42514000 |
| H | -1.51947000 | 4.01176500  | 0.18503000  |
| H | 2.35540300  | 1.79487900  | -0.65242400 |
| H | 1.34066700  | 2.40682100  | -1.94637900 |
| S | 0.74173800  | 3.27240300  | 0.20842500  |
| F | 2.53353300  | -1.80217100 | 1.78746700  |

(R)-TS<sub>2</sub>T-F-P

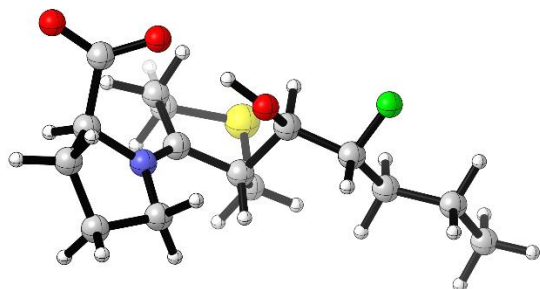

-----  
 - Thermochemistry -  
 -----

|                                              |                             |
|----------------------------------------------|-----------------------------|
| Zero-point correction=                       | 0.387521 (Hartree/Particle) |
| Thermal correction to Energy=                | 0.405381                    |
| Thermal correction to Enthalpy=              | 0.406246                    |
| Thermal correction to Gibbs Free Energy=     | 0.343042                    |
| Sum of electronic and zero-point Energies=   | -1363.750405                |
| Sum of electronic and thermal Energies=      | -1363.732545                |
| Sum of electronic and thermal Enthalpies=    | -1363.731680                |
| Sum of electronic and thermal Free Energies= | -1363.794884                |

Number of Imaginary Frequencies = 0

E (Single Point Energy) [IEFPCM<sub>(DCM)</sub>M06-2X/6-311++G(2d,2p)] = -1364.435765

|   |             |             |             |
|---|-------------|-------------|-------------|
| C | 0.52554800  | 0.28872800  | -0.67187300 |
| H | 0.64263400  | -0.48033500 | -1.44022600 |
| C | -0.94312100 | 0.57465900  | -0.46314800 |
| N | -1.83035000 | -0.29518000 | -0.81307400 |
| C | -3.24806500 | -0.26741300 | -0.35381700 |
| H | -3.74792000 | 0.58864500  | -0.81378400 |
| C | -1.56472200 | -1.52766500 | -1.60702900 |
| H | -1.11173500 | -2.26214800 | -0.93409200 |
| H | -0.88295500 | -1.30184400 | -2.42531300 |
| C | -2.95439900 | -1.94138200 | -2.07210600 |
| H | -2.98769600 | -2.99946600 | -2.33486600 |
| H | -3.24547500 | -1.35436000 | -2.94844000 |
| C | -3.82939900 | -1.59319000 | -0.87093500 |
| H | -4.88659700 | -1.48657700 | -1.11260400 |
| H | -3.72804000 | -2.36194100 | -0.09772600 |
| C | -1.34444800 | 1.80908800  | 0.30001400  |
| H | -2.42595500 | 1.94643400  | 0.26576800  |
| H | -1.07982700 | 1.63525900  | 1.35049000  |
| C | 1.01835100  | -0.34129700 | 0.68273400  |
| H | 1.18057500  | 0.46935100  | 1.40779800  |
| C | 2.31932700  | -1.13998000 | 0.55170900  |
| O | 0.09393500  | -1.28985200 | 1.15718500  |
| C | -3.37802600 | -0.18772700 | 1.19676700  |
| O | -2.35805500 | -0.45981600 | 1.88356400  |
| O | -4.52068700 | 0.09749500  | 1.58816800  |
| C | 3.52535900  | -0.49670700 | -0.10527800 |

|   |             |             |             |
|---|-------------|-------------|-------------|
| H | 3.31829900  | -0.38961900 | -1.17681000 |
| C | 4.78872200  | -1.34519300 | 0.05545100  |
| H | 5.02785400  | -1.44122700 | 1.11839200  |
| H | 4.58959800  | -2.35828800 | -0.31620100 |
| H | 2.07673200  | -2.08958700 | 0.05669200  |
| H | 3.69501800  | 0.50550100  | 0.31054800  |
| C | 5.97432600  | -0.74057600 | -0.69322100 |
| H | 6.19425500  | 0.26688600  | -0.32507900 |
| H | 6.87405900  | -1.34806400 | -0.56532900 |
| H | 5.76660700  | -0.66744400 | -1.76584400 |
| H | -0.75757400 | -0.90077400 | 1.47468500  |
| C | -0.66520600 | 3.09204900  | -0.18745400 |
| C | 1.27316800  | 1.54260800  | -1.16587200 |
| H | -0.95173800 | 3.32584000  | -1.21725800 |
| H | -0.98324900 | 3.91968400  | 0.44816600  |
| H | 2.33385200  | 1.34069400  | -1.28762800 |
| H | 0.88555500  | 1.81640500  | -2.15253600 |
| S | 1.13928500  | 2.98576100  | -0.07832400 |
| F | 2.67573200  | -1.46861700 | 1.86876600  |

(S)-TS2<sub>T</sub>-F-Pre

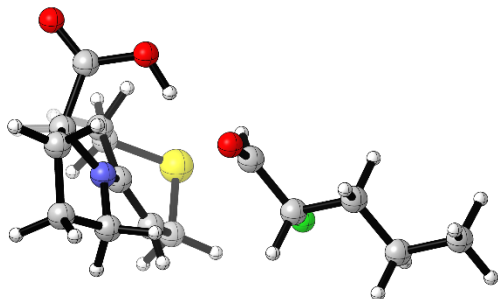

-----  
- Thermochemistry -  
-----

|                                              |                             |
|----------------------------------------------|-----------------------------|
| Zero-point correction=                       | 0.383092 (Hartree/Particle) |
| Thermal correction to Energy=                | 0.402640                    |
| Thermal correction to Enthalpy=              | 0.403505                    |
| Thermal correction to Gibbs Free Energy=     | 0.335488                    |
| Sum of electronic and zero-point Energies=   | -1363.738588                |
| Sum of electronic and thermal Energies=      | -1363.719040                |
| Sum of electronic and thermal Enthalpies=    | -1363.718175                |
| Sum of electronic and thermal Free Energies= | -1363.786192                |

Number of Imaginary Frequencies = 0

E (Single Point Energy) [IEFPCM(DCM)M06-2X/6-311++G(2d,2p)] = -1364.421894

|   |             |             |             |
|---|-------------|-------------|-------------|
| C | -0.21774400 | 1.22389200  | -1.34343900 |
| H | 0.26776300  | 0.58209500  | -2.07251200 |
| C | -1.27136900 | 0.74341100  | -0.63841100 |
| N | -1.68309900 | -0.57676500 | -0.76329400 |
| C | -2.88614400 | -1.12028800 | -0.14735400 |
| H | -3.80138600 | -0.59836400 | -0.45666800 |
| C | -1.22858700 | -1.39649900 | -1.89333800 |
| H | -0.24620400 | -1.83445300 | -1.67459100 |
| H | -1.13557600 | -0.77794300 | -2.79270200 |
| C | -2.31940200 | -2.45758500 | -2.05301900 |
| H | -1.92960000 | -3.40422400 | -2.43118100 |
| H | -3.08645600 | -2.09942300 | -2.74645200 |

|   |             |             |             |
|---|-------------|-------------|-------------|
| C | -2.90605000 | -2.57765700 | -0.64822800 |
| H | -3.91275300 | -2.99661800 | -0.61894300 |
| H | -2.25298000 | -3.19151300 | -0.01745600 |
| C | -2.02439100 | 1.56542500  | 0.38896800  |
| H | -3.10051700 | 1.39174800  | 0.26936700  |
| H | -1.75733300 | 1.22156700  | 1.39670600  |
| C | 1.30138100  | -0.30882800 | 0.68882300  |
| H | 0.97463300  | 0.58529000  | 1.24849000  |
| C | 2.59786700  | -0.18401700 | -0.07873600 |
| O | 0.69833800  | -1.36548700 | 0.73559200  |
| C | -2.87841100 | -1.12755300 | 1.37778300  |
| O | -1.70856100 | -1.30774200 | 1.98314100  |
| O | -3.90405800 | -1.04010400 | 2.01748800  |
| C | 3.69903700  | -1.01732000 | 0.56002100  |
| H | 3.83882800  | -0.68283800 | 1.59586100  |
| C | 5.01719400  | -0.93105900 | -0.20760900 |
| H | 4.85506100  | -1.27265800 | -1.23734400 |
| H | 5.33474700  | 0.11528500  | -0.26591900 |
| H | 3.34425100  | -2.05397900 | 0.59640300  |
| C | 6.11050700  | -1.76886600 | 0.45186800  |
| H | 7.04849600  | -1.70254200 | -0.10541300 |
| H | 6.30072700  | -1.42571300 | 1.47379600  |
| H | 5.81978700  | -2.82315900 | 0.50051000  |
| H | -0.93826000 | -1.33706900 | 1.36455400  |
| H | 2.43903500  | -0.47372200 | -1.12412800 |
| C | -1.77824500 | 3.06547600  | 0.29666800  |
| C | 0.35858200  | 2.61245800  | -1.25475300 |
| H | 1.44814000  | 2.56392300  | -1.32444300 |

|   |             |            |             |
|---|-------------|------------|-------------|
| H | 0.00689800  | 3.24745500 | -2.07708400 |
| H | -2.21580300 | 3.47869900 | -0.61761400 |
| H | -2.23204900 | 3.57311400 | 1.14964300  |
| S | -0.00492800 | 3.45383300 | 0.31453200  |
| F | 2.96222300  | 1.16353400 | -0.06750700 |

(S)-TS2<sub>T-F</sub>

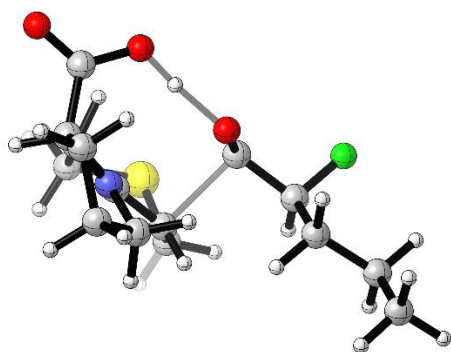

-----  
 - Thermochemistry -  
 -----

|                                              |                             |
|----------------------------------------------|-----------------------------|
| Zero-point correction=                       | 0.383158 (Hartree/Particle) |
| Thermal correction to Energy=                | 0.401128                    |
| Thermal correction to Enthalpy=              | 0.401993                    |
| Thermal correction to Gibbs Free Energy=     | 0.338699                    |
| Sum of electronic and zero-point Energies=   | -1363.730053                |
| Sum of electronic and thermal Energies=      | -1363.712083                |
| Sum of electronic and thermal Enthalpies=    | -1363.711218                |
| Sum of electronic and thermal Free Energies= | -1363.774512                |

Number of Imaginary Frequencies = 1

E (Single Point Energy) [IEFPCM(DCM)M06-2X/6-311++G(2d,2p)] = -1364.411596

|   |             |             |             |
|---|-------------|-------------|-------------|
| C | 0.24414800  | 1.03470300  | -1.01614000 |
| H | 0.93100900  | 0.38412300  | -1.55143200 |
| C | -1.02865900 | 0.53400400  | -0.75380500 |
| N | -1.25443600 | -0.78833300 | -0.79273800 |
| C | -2.46775900 | -1.44955700 | -0.29557200 |



|   |             |             |             |
|---|-------------|-------------|-------------|
| H | -3.33638700 | -1.18056700 | -0.90626700 |
| C | -0.35861000 | -1.73969300 | -1.48145100 |
| H | 0.50583500  | -1.95696400 | -0.84720300 |
| H | -0.01609100 | -1.30151700 | -2.42280400 |
| C | -1.23853300 | -2.97028100 | -1.68611900 |
| H | -0.65098200 | -3.88629600 | -1.76296200 |
| H | -1.83444900 | -2.86027000 | -2.59734200 |
| C | -2.14480500 | -2.94651000 | -0.45700500 |
| H | -3.05490200 | -3.53789100 | -0.56127300 |
| H | -1.59485900 | -3.29968900 | 0.42244000  |
| C | -2.14999800 | 1.40271700  | -0.22582600 |
| H | -3.10782700 | 0.99033000  | -0.56018600 |
| H | -2.14652400 | 1.35587000  | 0.87101900  |
| C | 0.95316700  | 0.42161200  | 0.98173900  |
| H | 0.52061800  | 1.33293800  | 1.42070900  |
| C | 2.44892400  | 0.51718200  | 0.68647000  |
| O | 0.47930900  | -0.70832100 | 1.27245300  |
| C | -2.83722800 | -1.15840600 | 1.16195600  |
| O | -1.87445800 | -0.91360400 | 2.01871900  |
| O | -4.00533600 | -1.22658800 | 1.49787400  |
| C | 3.06902500  | -0.74053400 | 0.11944900  |
| H | 2.81410000  | -1.58093000 | 0.77454900  |
| C | 4.58381600  | -0.62445400 | -0.04846300 |
| H | 4.81257500  | 0.22755500  | -0.70108100 |
| H | 5.03876600  | -0.40836800 | 0.92370800  |
| H | 2.60872700  | -0.94367500 | -0.85586300 |
| C | 5.18923400  | -1.89934800 | -0.63176200 |
| H | 6.27250300  | -1.80808600 | -0.74703800 |

|   |             |             |             |
|---|-------------|-------------|-------------|
| H | 4.99077600  | -2.75682000 | 0.01936600  |
| H | 4.76277900  | -2.12075600 | -1.61581800 |
| H | -0.89732200 | -0.83728900 | 1.64877900  |
| H | 2.68410600  | 1.39400900  | 0.07760300  |
| C | -2.07051300 | 2.86132000  | -0.66029000 |
| C | 0.52945600  | 2.50579800  | -1.21529900 |
| H | 1.56788500  | 2.73682600  | -0.96504900 |
| H | 0.39459400  | 2.78414100  | -2.26705000 |
| H | -2.20421700 | 2.95873000  | -1.74192600 |
| H | -2.85703400 | 3.43597100  | -0.16848400 |
| S | -0.48628100 | 3.60949300  | -0.19140400 |
| F | 3.02575000  | 0.77131700  | 1.94951000  |

(S)-TS2<sub>T</sub>-F-P

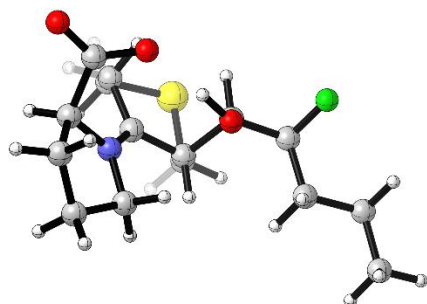

-----  
 - Thermochemistry -  
 -----

|                                              |                             |
|----------------------------------------------|-----------------------------|
| Zero-point correction=                       | 0.415255 (Hartree/Particle) |
| Thermal correction to Energy=                | 0.432945                    |
| Thermal correction to Enthalpy=              | 0.433810                    |
| Thermal correction to Gibbs Free Energy=     | 0.370935                    |
| Sum of electronic and zero-point Energies=   | -1004.874756                |
| Sum of electronic and thermal Energies=      | -1004.857066                |
| Sum of electronic and thermal Enthalpies=    | -1004.856201                |
| Sum of electronic and thermal Free Energies= | -1004.919076                |

Number of Imaginary Frequencies = 0

E (Single Point Energy) [IEFPCM<sub>(DCM)</sub>M06-2X/6-311++G(2d,2p)] = -1005.564970

|   |             |             |             |
|---|-------------|-------------|-------------|
| C | 0.53459300  | 0.79357500  | -0.70059700 |
| H | 0.82562400  | -0.00447800 | -1.38553400 |
| C | -0.96108900 | 0.80227000  | -0.53835800 |
| N | -1.65908600 | -0.24830600 | -0.81256600 |
| C | -3.06582500 | -0.43561600 | -0.39218400 |
| H | -3.66676300 | 0.42828300  | -0.67541200 |
| C | -1.12245000 | -1.51461800 | -1.40189100 |
| H | -0.17194700 | -1.76217400 | -0.93475300 |
| H | -0.98846600 | -1.34335400 | -2.47434700 |
| C | -2.21607300 | -2.54144200 | -1.11955300 |
| H | -2.05900300 | -2.98817300 | -0.13293800 |
| H | -2.21399900 | -3.33812100 | -1.86445900 |
| C | -3.49517800 | -1.70490200 | -1.12580900 |
| H | -3.79415100 | -1.46534700 | -2.15116000 |
| H | -4.33432200 | -2.17651600 | -0.61461900 |
| C | -1.57274600 | 2.02061400  | 0.09124400  |
| H | -2.65971300 | 2.00230900  | 0.02848800  |
| H | -1.32565400 | 1.96546700  | 1.16032300  |
| C | 0.50962500  | 3.34250000  | -0.49465300 |
| C | 1.08265600  | 0.41300700  | 0.71762900  |
| H | 0.81160000  | 1.20051900  | 1.43501000  |
| C | 2.60695000  | 0.31736100  | 0.73018600  |
| H | 3.04548500  | 1.28153500  | 0.45001800  |
| O | 0.56632100  | -0.82619000 | 1.13261600  |
| C | -3.13518500 | -0.59946800 | 1.16977000  |
| O | -2.05571600 | -0.52169900 | 1.81390900  |

|   |             |             |             |
|---|-------------|-------------|-------------|
| O | -4.28292000 | -0.78689600 | 1.60196800  |
| H | -0.36884400 | -0.72500300 | 1.43034300  |
| C | 3.18529300  | -0.80441100 | -0.11015800 |
| H | 2.93049200  | -0.61487800 | -1.16148600 |
| C | 4.70404100  | -0.91871500 | 0.02100800  |
| H | 5.16367900  | 0.04024300  | -0.25037600 |
| H | 2.70261700  | -1.74521700 | 0.17841900  |
| C | 5.26873200  | -2.03083800 | -0.86006300 |
| H | 6.35434100  | -2.10766300 | -0.75646800 |
| H | 4.83545200  | -2.99899500 | -0.58868500 |
| H | 5.04277000  | -1.84732800 | -1.91578200 |
| H | 4.96183700  | -1.10685000 | 1.06804700  |
| C | 1.04550900  | 2.13436900  | -1.26110300 |
| C | -1.01672400 | 3.32344000  | -0.50554800 |
| H | 2.13848000  | 2.12686600  | -1.28396300 |
| H | 0.71974200  | 2.20641200  | -2.30592700 |
| H | -1.37562500 | 3.43146900  | -1.53620300 |
| H | -1.42455000 | 4.16084300  | 0.06608800  |
| H | 0.87739100  | 3.34240200  | 0.53887000  |
| H | 0.87581000  | 4.26205300  | -0.95998500 |
| F | 2.97522800  | 0.11215200  | 2.06855400  |

**Supplementary Table 9.** Energies for enamine addition to 2-bromopentanal. Reported energies for structures optimized at the IEFPCM<sub>(DCM)</sub>M06-2X/6-311++G(2d,2p)//IEFPCM<sub>(DCM)</sub>M06-2X/6-31+G(d,p) level of theory represent the sum of the thermal correction to Gibbs Free Energy computed at the IEFPCM<sub>(DCM)</sub>M06-2X/6-31+G(d,p) level of theory and single point energies computed at the IEFPCM<sub>(DCM)</sub>M06-2X/6-311++G(2d,2p). All energies are reported in Hartrees.

| Structure                                 | Single Point Energies, E<br>IEFPCM <sub>(DCM)</sub> M06-2X/6-311++G(2d,2p) | Thermal Corrections to Gibbs Free Energies,<br>IEFPCM <sub>(DCM)</sub> M06-2X/6-31+G(d,p) | Gibbs Free Energies (G),<br>IEFPCM <sub>(DCM)</sub> M06-2X/6-31+G(d,p) | Gibbs Free Energies (G),<br>IEFPCM <sub>(DCM)</sub> M06-2X/6-311++G(2d,2p)//<br>IEFPCM <sub>(DCM)</sub> M06-2X/6-31+G(d,p) |
|-------------------------------------------|----------------------------------------------------------------------------|-------------------------------------------------------------------------------------------|------------------------------------------------------------------------|----------------------------------------------------------------------------------------------------------------------------|
| 2-Bromopentanal                           | -2845.302023                                                               | 0.102041                                                                                  | -2842.756584                                                           | -2845.199982                                                                                                               |
| Enamine of Cyclohexanone (G)              | -634.55147535                                                              | 0.238392                                                                                  | -634.142903                                                            | -634.3130834                                                                                                               |
| Enamine of Dioxane (O)                    | -784.98483791                                                              | 0.244077                                                                                  | -784.522619                                                            | -784.7407609                                                                                                               |
| Enamine of Tetrahydro-4H-thiopyranone (T) | -993.43210840                                                              | 0.210205                                                                                  | -993.028735                                                            | -993.2219034                                                                                                               |
| Enamine of Tetrahydro-4H-pyranone (P)     | -670.45469021                                                              | 0.214793                                                                                  | -670.055312                                                            | -670.2398972                                                                                                               |
| (R)-TS <sub>2p</sub> -Br-Pre              | -3515.773643                                                               | 0.337623                                                                                  | -3512.813022                                                           | -3515.43602                                                                                                                |
| (R)-TS <sub>2p</sub> -Br                  | -3515.7581                                                                 | 0.340676                                                                                  | -3512.79657                                                            | -3515.417424                                                                                                               |
| (R)-TS <sub>2p</sub> -Br-P                | -3515.787444                                                               | 0.34455                                                                                   | -3512.822467                                                           | -3515.442891                                                                                                               |
| (S)-TS <sub>2p</sub> -Br-Pre              | -3515.7753                                                                 | 0.337211                                                                                  | -3512.815113                                                           | -3515.438089                                                                                                               |
| (S)-TS <sub>2p</sub> -Br                  | -3515.764418                                                               | 0.339866                                                                                  | -3512.804072                                                           | -3515.424552                                                                                                               |
| (S)-TS <sub>2p</sub> -Br P                | -3515.792756                                                               | 0.343886                                                                                  | -3512.829062                                                           | -3515.44887                                                                                                                |
| (R)-TS <sub>2G</sub> Br-Pre               | -3479.870764                                                               | 0.360822                                                                                  | -3476.901401                                                           | -3479.509942                                                                                                               |
| (R)-TS <sub>2G</sub> -Br                  | -3479.855265                                                               | 0.364163                                                                                  | -3476.884545                                                           | -3479.491102                                                                                                               |
| (R)-TS <sub>2G</sub> -Br-P                | -3479.885376                                                               | 0.368128                                                                                  | -3476.911154                                                           | -3479.517248                                                                                                               |
| (S)-TS <sub>2G</sub> -Br-Pre              | -3479.871179                                                               | 0.360308                                                                                  | -3476.904008                                                           | -3479.510871                                                                                                               |
| (S)-TS <sub>2G</sub> -Br                  | -3479.861757                                                               | 0.363804                                                                                  | -3476.892016                                                           | -3479.497953                                                                                                               |
| (S)-TS <sub>2G</sub> -Br-P                | -3479.891844                                                               | 0.36803                                                                                   | -3476.918369                                                           | -3479.523814                                                                                                               |
| (R)-TS <sub>2O</sub> -Br-Pre              | -3630.304563                                                               | 0.366796                                                                                  | -3627.281363                                                           | -3629.937767                                                                                                               |

|                              |              |          |              |              |
|------------------------------|--------------|----------|--------------|--------------|
| (R)-TS2 <sub>O</sub> -Br     | -3630.289223 | 0.369445 | -3627.266059 | -3629.919778 |
| (R)-TS2 <sub>O</sub> -Br-P   | -3630.315195 | 0.372588 | -3627.289573 | -3629.942607 |
| (S)-TS2 <sub>O</sub> -Br-Pre | -3630.306273 | 0.365643 | -3627.287761 | -3629.94063  |
| (S)-TS2 <sub>O</sub> -Br     | -3630.293793 | 0.368103 | -3627.272308 | -3629.92569  |
| (S)-TS2 <sub>O</sub> -Br-P   | -3630.31805  | 0.370977 | -3627.293836 | -3629.947073 |
| (R)-TS2 <sub>T</sub> -Br-Pre | -3838.749773 | 0.332897 | -3835.784701 | -3838.416876 |
| (R)-TS2 <sub>T</sub> -Br     | -3838.734498 | 0.335789 | -3835.769038 | -3838.398709 |
| (R)-TS2 <sub>T</sub> -Br-P   | -3838.761015 | 0.339331 | -3835.793023 | -3838.421684 |
| (S)-TS2 <sub>T</sub> -Br-Pre | -3838.752143 | 0.332851 | -3835.787543 | -3838.419292 |
| (S)-TS2 <sub>T</sub> -Br     | -3838.741723 | 0.335558 | -3835.777067 | -3838.406165 |
| (S)-TS2 <sub>T</sub> -Br-P   | -3838.768722 | 0.339318 | -3835.80117  | -3838.429404 |

Pre – Precomplex

P – Product

(R)-TS2<sub>P</sub>-Br-Pre

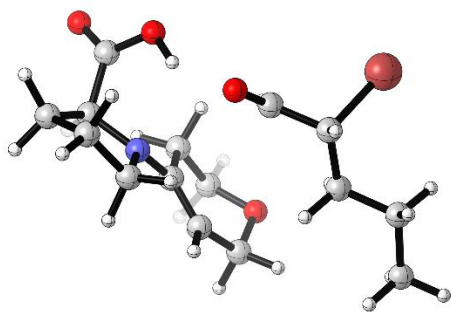

-----  
- Thermochemistry -  
-----

|                                            |                             |
|--------------------------------------------|-----------------------------|
| Zero-point correction=                     | 0.385643 (Hartree/Particle) |
| Thermal correction to Energy=              | 0.404980                    |
| Thermal correction to Enthalpy=            | 0.405845                    |
| Thermal correction to Gibbs Free Energy=   | 0.337623                    |
| Sum of electronic and zero-point Energies= | -3512.765002                |
| Sum of electronic and thermal Energies=    | -3512.745665                |
| Sum of electronic and thermal Enthalpies=  | -3512.744800                |

Sum of electronic and thermal Free Energies=

-3512.813022

Number of Imaginary Frequencies = 0

E (Single Point Energy) [IEFPCM(DCM)M06-2X/6-311++G(2d,2p)] = -3515.773643

|   |             |             |             |
|---|-------------|-------------|-------------|
| C | 0.60890900  | 2.19325600  | 0.57120500  |
| H | 0.58811100  | 2.24278500  | 1.65521600  |
| C | 1.44777000  | 1.36068500  | -0.07714800 |
| N | 2.24220400  | 0.42071600  | 0.57744300  |
| C | 3.51685300  | -0.02589200 | 0.01900000  |
| H | 4.04472200  | 0.75960900  | -0.53026200 |
| C | 2.25204700  | 0.36617300  | 2.03796800  |
| H | 1.24901800  | 0.13131400  | 2.40771200  |
| H | 2.56488600  | 1.33130400  | 2.46795300  |
| C | 3.27484800  | -0.72488000 | 2.32908900  |
| H | 2.81565600  | -1.71077300 | 2.19697000  |
| H | 3.67657000  | -0.66605000 | 3.34203800  |
| C | 4.33779900  | -0.46701600 | 1.25681200  |
| H | 4.98089700  | 0.36366900  | 1.55961500  |
| H | 4.97485900  | -1.32845400 | 1.04558300  |
| C | 1.49049600  | 1.34252600  | -1.58886700 |
| H | 2.52353700  | 1.39468900  | -1.95030800 |
| H | 1.07761900  | 0.39524800  | -1.96204700 |
| C | -0.68081200 | -1.09972500 | 0.26286100  |
| H | -0.40866700 | -0.67701100 | -0.72186300 |
| C | -2.11316300 | -0.90240000 | 0.67846900  |
| O | 0.13124100  | -1.69011800 | 0.94411500  |
| C | 3.35391100  | -1.19743500 | -0.94851400 |
| O | 2.30230100  | -1.99158500 | -0.75854800 |
| O | 4.16446500  | -1.43121100 | -1.81819400 |

|    |             |             |             |
|----|-------------|-------------|-------------|
| C  | -2.50486400 | 0.56433200  | 0.66725300  |
| H  | -1.85296300 | 1.05442000  | 1.40503700  |
| C  | -3.96488400 | 0.82569100  | 1.02895700  |
| H  | -4.61170000 | 0.42699700  | 0.24072800  |
| H  | -4.21118100 | 0.27875000  | 1.94728700  |
| H  | -2.30121500 | -1.38760100 | 1.63696700  |
| H  | -2.26120000 | 1.00148900  | -0.31052200 |
| C  | -4.23084200 | 2.31706200  | 1.21811300  |
| H  | -3.61513700 | 2.72541600  | 2.02637100  |
| H  | -5.27894900 | 2.50319800  | 1.46566900  |
| H  | -3.99860600 | 2.87288400  | 0.30342800  |
| H  | 1.72179700  | -1.66882000 | -0.03259700 |
| C  | 0.71434400  | 2.52257600  | -2.16707100 |
| C  | -0.33716400 | 3.09966600  | -0.17150100 |
| H  | 1.30259000  | 3.44673400  | -2.06306900 |
| H  | 0.50074000  | 2.36501200  | -3.22557500 |
| H  | -1.32558100 | 3.09886400  | 0.29867900  |
| H  | 0.02610200  | 4.14101200  | -0.16333600 |
| O  | -0.53168200 | 2.68368700  | -1.51199500 |
| Br | -3.12569800 | -1.93296000 | -0.64641600 |



(R)-TS2p-Br

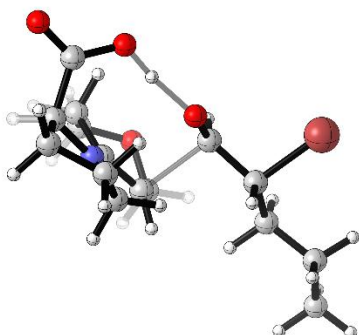

-----  
- Thermochemistry -  
-----

|                                              |                             |
|----------------------------------------------|-----------------------------|
| Zero-point correction=                       | 0.385310 (Hartree/Particle) |
| Thermal correction to Energy=                | 0.403073                    |
| Thermal correction to Enthalpy=              | 0.403938                    |
| Thermal correction to Gibbs Free Energy=     | 0.340676                    |
| Sum of electronic and zero-point Energies=   | -3512.751936                |
| Sum of electronic and thermal Energies=      | -3512.734173                |
| Sum of electronic and thermal Enthalpies=    | -3512.733308                |
| Sum of electronic and thermal Free Energies= | -3512.796570                |

Number of Imaginary Frequencies = 1

E (Single Point Energy) [IEFPCM(DCM)M06-2X/6-311++G(2d,2p)] = -3515.758121

|   |             |             |            |
|---|-------------|-------------|------------|
| C | 0.13728100  | 1.55925900  | 0.59966900 |
| H | -0.25719300 | 1.30177300  | 1.57841900 |
| C | 1.46579200  | 1.23617900  | 0.32622200 |
| N | 2.07367300  | 0.21462800  | 0.93421700 |
| C | 3.42732800  | -0.25696000 | 0.62210300 |
| H | 4.14176200  | 0.56947000  | 0.62953300 |
| C | 1.48943100  | -0.51034600 | 2.07669100 |
| H | 0.44048000  | -0.73098500 | 1.88402500 |
| H | 1.57097600  | 0.11089100  | 2.97805000 |
| C | 2.35028200  | -1.76434400 | 2.16511600 |

|   |             |             |             |
|---|-------------|-------------|-------------|
| H | 1.98689100  | -2.50583200 | 1.44600400  |
| H | 2.33572800  | -2.20714100 | 3.16196000  |
| C | 3.73332100  | -1.25124900 | 1.76067200  |
| H | 4.19344100  | -0.70874300 | 2.59130600  |
| H | 4.42226800  | -2.03213800 | 1.43633500  |
| C | 2.17069700  | 1.89121500  | -0.83561400 |
| H | 3.23337800  | 2.02759900  | -0.61629100 |
| H | 2.09978500  | 1.22778100  | -1.70812100 |
| C | -0.62747000 | -0.14362200 | -0.53669700 |
| H | -0.71824700 | 0.53000900  | -1.40268100 |
| C | -1.93388300 | -0.46478500 | 0.18747000  |
| O | 0.22992200  | -1.07027700 | -0.52797500 |
| C | 3.58363800  | -0.93377400 | -0.75185300 |
| O | 2.52171900  | -1.31599000 | -1.41687100 |
| O | 4.71196700  | -1.11668800 | -1.17123900 |
| C | -2.90833400 | 0.64620000  | 0.53033100  |
| H | -2.39983600 | 1.32911700  | 1.22097500  |
| C | -4.18619000 | 0.16201400  | 1.21893600  |
| H | -4.80474100 | -0.38699000 | 0.50320200  |
| H | -3.91921200 | -0.54771800 | 2.01214100  |
| H | -1.71391100 | -1.09948900 | 1.04860800  |
| H | -3.16253000 | 1.21521500  | -0.37204500 |
| C | -4.97753300 | 1.32933500  | 1.80397600  |
| H | -4.39529500 | 1.85753200  | 2.56589100  |
| H | -5.90533700 | 0.98457700  | 2.26772900  |
| H | -5.24063800 | 2.05056100  | 1.02320600  |
| H | 1.58201800  | -1.12920400 | -1.00754500 |
| C | 1.53538500  | 3.23450100  | -1.17041700 |

|    |             |             |             |
|----|-------------|-------------|-------------|
| C  | -0.46069100 | 2.79340300  | -0.04956900 |
| H  | 1.76383100  | 3.97488300  | -0.38969900 |
| H  | 1.90901000  | 3.60785500  | -2.12485300 |
| H  | -1.52289800 | 2.65700600  | -0.25659600 |
| H  | -0.36361100 | 3.66306600  | 0.62062200  |
| O  | 0.13477800  | 3.08939100  | -1.29756600 |
| Br | -2.83923600 | -1.68900300 | -1.08579200 |

**(R)-TS2<sub>p</sub>-Br-P**

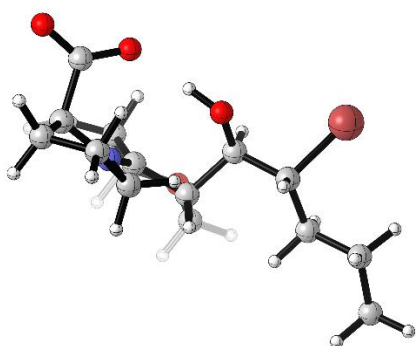

-----  
- Thermochemistry -  
-----

|                                              |                             |
|----------------------------------------------|-----------------------------|
| Zero-point correction=                       | 0.389470 (Hartree/Particle) |
| Thermal correction to Energy=                | 0.407248                    |
| Thermal correction to Enthalpy=              | 0.408113                    |
| Thermal correction to Gibbs Free Energy=     | 0.344553                    |
| Sum of electronic and zero-point Energies=   | -3512.777551                |
| Sum of electronic and thermal Energies=      | -3512.759773                |
| Sum of electronic and thermal Enthalpies=    | -3512.758908                |
| Sum of electronic and thermal Free Energies= | -3512.822467                |

Number of Imaginary Frequencies = 0

E (Single Point Energy) [IEFPCM(DCM)M06-2X/6-311++G(2d,2p)] = -3515.787444

|   |             |            |            |
|---|-------------|------------|------------|
| C | -0.00803000 | 1.15655900 | 0.39302100 |
| H | -0.18533600 | 1.01914300 | 1.46398300 |
| C | 1.46705900  | 1.06416900 | 0.10742800 |

|   |             |             |             |
|---|-------------|-------------|-------------|
| N | 2.23423800  | 0.33488000  | 0.84346700  |
| C | 3.63507800  | -0.00621400 | 0.50194700  |
| H | 4.19706800  | 0.90216800  | 0.28080700  |
| C | 1.78881400  | -0.42849600 | 2.04726400  |
| H | 0.81830300  | -0.87943900 | 1.85267300  |
| H | 1.72430200  | 0.27873200  | 2.88009500  |
| C | 2.90186100  | -1.45095200 | 2.25409800  |
| H | 2.71095600  | -2.33513400 | 1.63802500  |
| H | 2.96762400  | -1.76142100 | 3.29743300  |
| C | 4.14530100  | -0.71351200 | 1.75736500  |
| H | 4.47854600  | 0.02050700  | 2.49765900  |
| H | 4.97927600  | -1.36976800 | 1.50990100  |
| C | 1.96938400  | 1.72784600  | -1.13936500 |
| H | 3.05345100  | 1.84147400  | -1.13619300 |
| H | 1.72037400  | 1.05147300  | -1.96759500 |
| C | -0.70168000 | -0.00700300 | -0.41421100 |
| H | -0.88737500 | 0.37551700  | -1.42856100 |
| C | -2.02627900 | -0.44289100 | 0.22944000  |
| O | 0.07377100  | -1.17764900 | -0.43437400 |
| C | 3.68813900  | -0.93422300 | -0.76736800 |
| O | 2.60367900  | -1.19330500 | -1.35143700 |
| O | 4.83455800  | -1.30356300 | -1.06210200 |
| C | -3.01716200 | 0.62591400  | 0.65712900  |
| H | -2.50478200 | 1.27971000  | 1.37592500  |
| C | -4.26262600 | 0.07397400  | 1.35272100  |
| H | -4.87907700 | -0.46348300 | 0.62648800  |
| H | -3.95568000 | -0.66027100 | 2.10817100  |
| H | -1.78482000 | -1.10212900 | 1.06823200  |

|    |             |             |             |
|----|-------------|-------------|-------------|
| H  | -3.31162500 | 1.24110600  | -0.20190400 |
| C  | -5.07714200 | 1.18970900  | 2.00297400  |
| H  | -4.49474700 | 1.70648500  | 2.77262800  |
| H  | -5.98163900 | 0.79545900  | 2.47324400  |
| H  | -5.38287600 | 1.93228800  | 1.25859200  |
| H  | 0.95107200  | -1.08871400 | -0.87876200 |
| C  | 1.28324500  | 3.07316200  | -1.37572300 |
| C  | -0.53012000 | 2.55204000  | -0.01495600 |
| H  | 1.61295800  | 3.81800700  | -0.63761400 |
| H  | 1.52506000  | 3.43908100  | -2.37372900 |
| H  | -1.61704100 | 2.57164300  | -0.02369300 |
| H  | -0.17836000 | 3.29474600  | 0.71589800  |
| O  | -0.11876300 | 2.91948500  | -1.31158600 |
| Br | -2.91132300 | -1.63118800 | -1.06715900 |

(S)-TS2<sub>P</sub>-Br-Pre

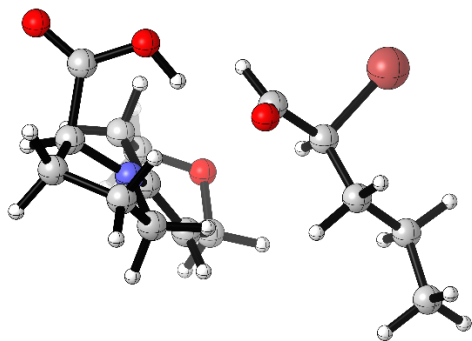

-----  
 - Thermochemistry -  
 -----

|                                            |                             |
|--------------------------------------------|-----------------------------|
| Zero-point correction=                     | 0.385313 (Hartree/Particle) |
| Thermal correction to Energy=              | 0.404752                    |
| Thermal correction to Enthalpy=            | 0.405617                    |
| Thermal correction to Gibbs Free Energy=   | 0.337211                    |
| Sum of electronic and zero-point Energies= | -3512.767010                |
| Sum of electronic and thermal Energies=    | -3512.747572                |

Sum of electronic and thermal Enthalpies= -3512.746707  
Sum of electronic and thermal Free Energies= -3512.815113

Number of Imaginary Frequencies = 0

E (Single Point Energy) [IEFPCM<sub>(DCM)</sub>M06-2X/6-311++G(2d,2p)] = -3515.775255

|   |             |             |             |
|---|-------------|-------------|-------------|
| C | -0.43663000 | 2.02210600  | 0.50541800  |
| H | -0.31358800 | 2.53604100  | -0.44215200 |
| C | -1.41689500 | 1.11187900  | 0.68613000  |
| N | -2.22287700 | 0.66243200  | -0.35188100 |
| C | -3.52886500 | 0.05172600  | -0.13254500 |
| H | -4.07068100 | 0.48399700  | 0.71353700  |
| C | -2.11148600 | 1.25491900  | -1.68465500 |
| H | -1.09666000 | 1.11195300  | -2.06977500 |
| H | -2.32468600 | 2.33495900  | -1.65176600 |
| C | -3.17093200 | 0.50317900  | -2.48358200 |
| H | -2.77659700 | -0.46472600 | -2.81207800 |
| H | -3.49942700 | 1.05462000  | -3.36602000 |
| C | -4.28917900 | 0.31453100  | -1.45430200 |
| H | -4.85978000 | 1.24103100  | -1.34629800 |
| H | -4.98727500 | -0.48931300 | -1.69611600 |
| C | -1.61516300 | 0.45772600  | 2.03540300  |
| H | -2.65990600 | 0.54524700  | 2.35347800  |
| H | -1.39885800 | -0.61686700 | 1.97049900  |
| C | 0.64151500  | -0.96824500 | -0.18526600 |
| H | 0.22860000  | -1.47248000 | 0.70721800  |
| C | 1.97039700  | -0.28513600 | 0.01476800  |
| H | 1.97764600  | 0.22682200  | 0.97933500  |
| O | 0.06032100  | -1.00874800 | -1.24987600 |
| C | -3.43938800 | -1.45204100 | 0.13719200  |

|    |             |             |             |
|----|-------------|-------------|-------------|
| O  | -2.35684100 | -2.08640800 | -0.31177800 |
| O  | -4.32829000 | -2.05593600 | 0.69561000  |
| H  | -1.71189800 | -1.47149900 | -0.72578400 |
| C  | 2.39942900  | 0.56968500  | -1.15565800 |
| H  | 1.59693700  | 1.30764100  | -1.29990200 |
| C  | 3.72475900  | 1.29963300  | -0.95272700 |
| H  | 3.72965400  | 1.78150700  | 0.03365800  |
| H  | 2.42683100  | -0.04236300 | -2.06337700 |
| C  | 3.95067900  | 2.34713700  | -2.04076800 |
| H  | 4.91340700  | 2.84906500  | -1.91460100 |
| H  | 3.93947600  | 1.88509800  | -3.03333000 |
| H  | 3.16578600  | 3.11004400  | -2.01708200 |
| H  | 4.54732200  | 0.57643900  | -0.95114900 |
| C  | 0.55247000  | 2.34848100  | 1.59157900  |
| C  | -0.73185400 | 1.11661000  | 3.09313900  |
| H  | 1.56808700  | 2.39968200  | 1.18083200  |
| H  | 0.34230000  | 3.32656800  | 2.05419800  |
| H  | -1.17369000 | 2.07291600  | 3.40956300  |
| H  | -0.63150700 | 0.47414000  | 3.96922900  |
| O  | 0.57660500  | 1.34923300  | 2.59774300  |
| Br | 3.20060400  | -1.80388000 | 0.25093500  |

(S)-TS2<sub>P</sub>-Br

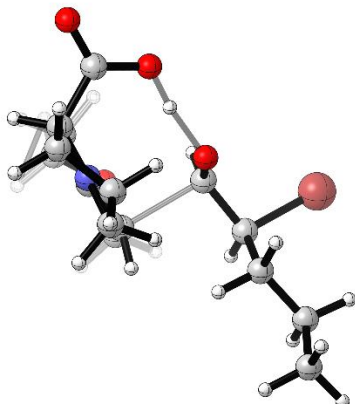

-----  
- Thermochemistry -  
-----

|                                              |                             |
|----------------------------------------------|-----------------------------|
| Zero-point correction=                       | 0.385009 (Hartree/Particle) |
| Thermal correction to Energy=                | 0.402922                    |
| Thermal correction to Enthalpy=              | 0.403787                    |
| Thermal correction to Gibbs Free Energy=     | 0.339866                    |
| Sum of electronic and zero-point Energies=   | -3512.758929                |
| Sum of electronic and thermal Energies=      | -3512.741016                |
| Sum of electronic and thermal Enthalpies=    | -3512.740151                |
| Sum of electronic and thermal Free Energies= | -3512.804072                |

Number of Imaginary Frequencies = 1

E (Single Point Energy) [IEFPCM<sub>(DCM)</sub>M06-2X/6-311++G(2d,2p)] = -3515.764418

|   |             |             |             |
|---|-------------|-------------|-------------|
| C | -0.28413000 | 0.88104600  | -1.51833600 |
| H | 0.14414600  | 0.07534300  | -2.10797900 |
| C | -1.55656000 | 0.71166700  | -0.97697200 |
| N | -2.06623300 | -0.50046900 | -0.73621900 |
| C | -3.32666900 | -0.74569700 | -0.02868300 |
| H | -4.13376400 | -0.13079900 | -0.43263300 |
| C | -1.46687400 | -1.74924400 | -1.24372100 |
| H | -0.39504600 | -1.75380600 | -1.05589900 |
| H | -1.65245000 | -1.82383400 | -2.32305500 |
| C | -2.19975600 | -2.83104900 | -0.45849300 |



|   |             |             |             |
|---|-------------|-------------|-------------|
| H | -1.71758800 | -2.96527800 | 0.51559500  |
| H | -2.20214900 | -3.78928000 | -0.97977600 |
| C | -3.60018900 | -2.23983700 | -0.28922900 |
| H | -4.16816300 | -2.33906800 | -1.21863800 |
| H | -4.18010800 | -2.68856700 | 0.51829800  |
| C | -2.29148700 | 1.91345700  | -0.43514400 |
| H | -3.36844300 | 1.81049500  | -0.59314300 |
| H | -2.12711400 | 1.96734700  | 0.65017800  |
| C | 0.64449600  | 0.45604500  | 0.40340600  |
| H | 0.44514200  | 1.49062100  | 0.71868600  |
| C | 2.05577100  | 0.21526300  | -0.11082700 |
| H | 2.36610100  | 0.95436700  | -0.84710900 |
| O | 0.05360200  | -0.50676300 | 0.96737400  |
| C | -3.28744600 | -0.45098600 | 1.48206600  |
| O | -2.13557100 | -0.30574800 | 2.08764200  |
| O | -4.34768800 | -0.38654100 | 2.07826400  |
| H | -1.24706700 | -0.37929800 | 1.53284200  |
| C | 2.33015300  | -1.20535500 | -0.55968000 |
| H | 1.67568200  | -1.39229100 | -1.42290300 |
| C | 3.77273800  | -1.46647800 | -0.99085000 |
| H | 4.11310700  | -0.64854700 | -1.63869700 |
| H | 2.02439800  | -1.89922700 | 0.22971000  |
| C | 3.90348400  | -2.80049900 | -1.72216100 |
| H | 4.94210500  | -3.00108700 | -1.99764200 |
| H | 3.55859700  | -3.62516400 | -1.08969500 |
| H | 3.30369000  | -2.80734000 | -2.63801500 |
| H | 4.42320600  | -1.45850200 | -0.11077300 |
| C | 0.17882200  | 2.27380700  | -1.89210100 |

|    |             |            |             |
|----|-------------|------------|-------------|
| C  | -1.80313300 | 3.19954400 | -1.09331800 |
| H  | 1.26201900  | 2.37455300 | -1.78455400 |
| H  | -0.06372100 | 2.48838200 | -2.94533800 |
| H  | -2.15503200 | 3.25287100 | -2.13401600 |
| H  | -2.17861000 | 4.07020300 | -0.55419400 |
| O  | -0.39062500 | 3.26812000 | -1.06313100 |
| Br | 3.19833200  | 0.63424400 | 1.45443800  |

(S)-TS<sub>2P</sub>-Br-P

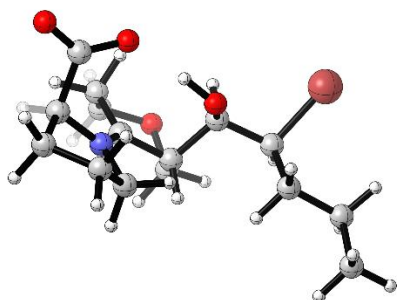

-----  
- Thermochemistry -  
-----

|                                              |                             |
|----------------------------------------------|-----------------------------|
| Zero-point correction=                       | 0.389332 (Hartree/Particle) |
| Thermal correction to Energy=                | 0.407242                    |
| Thermal correction to Enthalpy=              | 0.408107                    |
| Thermal correction to Gibbs Free Energy=     | 0.343886                    |
| Sum of electronic and zero-point Energies=   | -3512.783616                |
| Sum of electronic and thermal Energies=      | -3512.765706                |
| Sum of electronic and thermal Enthalpies=    | -3512.764841                |
| Sum of electronic and thermal Free Energies= | -3512.829062                |

Number of Imaginary Frequencies = 0

E (Single Point Energy) [IEFPCM<sub>(DCM)</sub>M06-2X/6-311++G(2d,2p)] = -3515.792756

|   |             |             |             |
|---|-------------|-------------|-------------|
| C | -0.09034800 | 0.60876300  | -1.21463200 |
| H | 0.10510400  | -0.27463300 | -1.82569500 |
| C | -1.53425200 | 0.65338300  | -0.81037100 |
| N | -2.23025500 | -0.42759000 | -0.71698700 |

|   |             |             |             |
|---|-------------|-------------|-------------|
| C | -3.55132100 | -0.50268800 | -0.05401000 |
| H | -4.21781300 | 0.26296600  | -0.45237500 |
| C | -1.74522500 | -1.79481200 | -1.07614200 |
| H | -0.71915100 | -1.91945700 | -0.73644500 |
| H | -1.80317100 | -1.88581500 | -2.16520900 |
| C | -2.73203200 | -2.72223300 | -0.37260100 |
| H | -2.39894700 | -2.90596900 | 0.65353400  |
| H | -2.81328300 | -3.67995300 | -0.88784600 |
| C | -4.03216300 | -1.91760700 | -0.37505800 |
| H | -4.49880400 | -1.94301600 | -1.36457700 |
| H | -4.75867600 | -2.25030000 | 0.36609800  |
| C | -2.06388400 | 1.98700700  | -0.37741700 |
| H | -3.15329200 | 2.00833600  | -0.34778700 |
| H | -1.71032300 | 2.14144800  | 0.65040900  |
| C | 0.71561200  | 0.51335500  | 0.13376600  |
| H | 0.63795800  | 1.49379300  | 0.62247000  |
| C | 2.19213900  | 0.22437100  | -0.14315400 |
| H | 2.61148900  | 0.94876800  | -0.84159300 |
| O | 0.22925800  | -0.51113000 | 0.95638000  |
| C | -3.39438200 | -0.26560900 | 1.49271900  |
| O | -2.23992000 | -0.02281800 | 1.93425000  |
| O | -4.46243900 | -0.34023400 | 2.11749300  |
| H | -0.64899400 | -0.28209700 | 1.34834000  |
| C | 2.47591600  | -1.20370300 | -0.58066600 |
| H | 1.85435500  | -1.40568000 | -1.46539700 |
| C | 3.93341200  | -1.46610500 | -0.95707000 |
| H | 4.28425600  | -0.67132700 | -1.62776300 |
| H | 2.14643800  | -1.89194800 | 0.20338000  |

|    |             |             |             |
|----|-------------|-------------|-------------|
| C  | 4.10339800  | -2.82685700 | -1.62873000 |
| H  | 5.15195500  | -3.02233500 | -1.86800200 |
| H  | 3.75361900  | -3.63014100 | -0.97196400 |
| H  | 3.52924000  | -2.88109000 | -2.55942700 |
| H  | 4.55571700  | -1.41399000 | -0.05806900 |
| C  | 0.26773100  | 1.85646000  | -2.04065400 |
| C  | -1.53385200 | 3.11332700  | -1.27235200 |
| H  | 1.34511500  | 1.91888400  | -2.19881500 |
| H  | -0.21427900 | 1.78730300  | -3.02644500 |
| H  | -1.99537400 | 3.06267300  | -2.26867700 |
| H  | -1.77274000 | 4.07849800  | -0.82557800 |
| O  | -0.12698300 | 3.04473300  | -1.39161900 |
| Br | 3.17364500  | 0.58404300  | 1.52550100  |

(R)-TS2<sub>G</sub>-Br-Pre

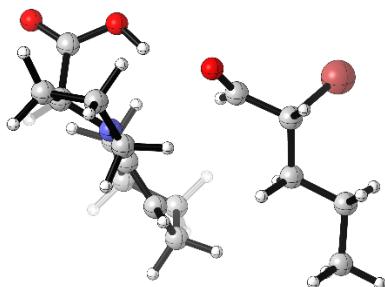

-----  
 - Thermochemistry -  
 -----

|                                              |                             |
|----------------------------------------------|-----------------------------|
| Zero-point correction=                       | 0.409212 (Hartree/Particle) |
| Thermal correction to Energy=                | 0.428825                    |
| Thermal correction to Enthalpy=              | 0.429690                    |
| Thermal correction to Gibbs Free Energy=     | 0.360822                    |
| Sum of electronic and zero-point Energies=   | -3476.853011                |
| Sum of electronic and thermal Energies=      | -3476.833398                |
| Sum of electronic and thermal Enthalpies=    | -3476.832533                |
| Sum of electronic and thermal Free Energies= | -3476.901401                |

Number of Imaginary Frequencies = 0

E (Single Point Energy) [IEFPCM<sub>(DCM)</sub>M06-2X/6-311++G(2d,2p)] = -3479.870764

|   |             |             |             |
|---|-------------|-------------|-------------|
| C | 0.60238200  | 2.11157700  | 0.56659800  |
| H | 0.48381500  | 2.05927400  | 1.64521100  |
| C | 1.50311900  | 1.31214700  | -0.04342900 |
| N | 2.20782200  | 0.31647800  | 0.64404000  |
| C | 3.55822900  | -0.07545700 | 0.24554800  |
| H | 4.14935300  | 0.75708100  | -0.14916700 |
| C | 2.01490200  | 0.14492100  | 2.08206200  |
| H | 0.97109400  | -0.11037600 | 2.29018800  |
| H | 2.26203500  | 1.06824700  | 2.63115000  |
| C | 2.99202900  | -0.97231600 | 2.42448400  |
| H | 2.56663800  | -1.94014500 | 2.13713600  |
| H | 3.23963900  | -1.00549300 | 3.48694900  |
| C | 4.19689400  | -0.62154800 | 1.54727400  |
| H | 4.77680100  | 0.18015100  | 2.01259000  |
| H | 4.87032500  | -1.45989300 | 1.35718300  |
| C | 1.74019600  | 1.36797100  | -1.53857400 |
| H | 2.81430700  | 1.34799500  | -1.75293800 |
| H | 1.32632600  | 0.45712700  | -1.99747900 |
| C | -0.77158300 | -1.06330000 | -0.05215800 |
| H | -0.58007300 | -0.51994200 | -0.99592600 |
| C | -2.15557900 | -0.91267300 | 0.52404400  |
| O | 0.08342100  | -1.74607200 | 0.47119900  |
| C | 3.56487100  | -1.15987800 | -0.83175900 |
| O | 2.48511800  | -1.93177400 | -0.91762400 |
| O | 4.52725300  | -1.34875900 | -1.54465100 |
| C | -2.53378700 | 0.54443200  | 0.71932600  |

|    |             |             |             |
|----|-------------|-------------|-------------|
| H  | -1.79137900 | 0.96367200  | 1.41298400  |
| C  | -3.93456900 | 0.76156400  | 1.28567900  |
| H  | -4.67880200 | 0.43042900  | 0.55407600  |
| H  | -4.06377100 | 0.13376200  | 2.17563200  |
| H  | -2.25037900 | -1.50428500 | 1.43549300  |
| H  | -2.41818200 | 1.08256500  | -0.23059600 |
| C  | -4.16377200 | 2.22889800  | 1.63958800  |
| H  | -3.44464900 | 2.56648300  | 2.39301100  |
| H  | -5.16945600 | 2.38745000  | 2.03690600  |
| H  | -4.04759600 | 2.86512100  | 0.75583300  |
| H  | 1.77434300  | -1.63954600 | -0.30232600 |
| C  | 1.11974200  | 2.60743500  | -2.18583100 |
| C  | -0.25555500 | 3.11440500  | -0.16472600 |
| H  | 1.73367900  | 3.48587700  | -1.94956600 |
| H  | 1.12835900  | 2.49116300  | -3.27355100 |
| H  | -1.26968200 | 3.10852300  | 0.25430400  |
| H  | 0.12980100  | 4.12983300  | 0.00779000  |
| C  | -0.29715800 | 2.83923400  | -1.66678900 |
| H  | -0.77340700 | 3.67161200  | -2.19406500 |
| H  | -0.90424300 | 1.94369200  | -1.86367700 |
| Br | -3.31823300 | -1.78049600 | -0.79328100 |

(R)-TS2<sub>G</sub>-Br

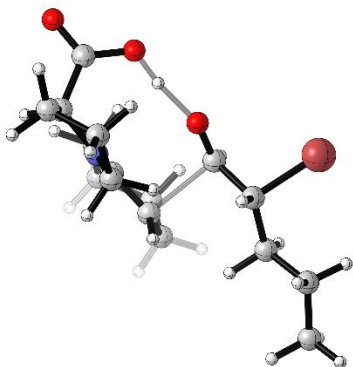

-----  
- Thermochemistry -  
-----

|                                              |                             |
|----------------------------------------------|-----------------------------|
| Zero-point correction=                       | 0.409040 (Hartree/Particle) |
| Thermal correction to Energy=                | 0.427059                    |
| Thermal correction to Enthalpy=              | 0.427924                    |
| Thermal correction to Gibbs Free Energy=     | 0.364163                    |
| Sum of electronic and zero-point Energies=   | -3476.839668                |
| Sum of electronic and thermal Energies=      | -3476.821649                |
| Sum of electronic and thermal Enthalpies=    | -3476.820784                |
| Sum of electronic and thermal Free Energies= | -3476.884545                |

Number of Imaginary Frequencies = 1

E (Single Point Energy) [IEFPCM(DCM)M06-2X/6-311++G(2d,2p)] = -3479.855265

|   |             |             |            |
|---|-------------|-------------|------------|
| C | 0.15184500  | 1.56017600  | 0.62176600 |
| H | -0.25228800 | 1.23448100  | 1.57667400 |
| C | 1.47856600  | 1.21960900  | 0.35550800 |
| N | 2.04712700  | 0.15663300  | 0.94152700 |
| C | 3.39825300  | -0.33526400 | 0.65143900 |
| H | 4.13351200  | 0.47016300  | 0.71357200 |
| C | 1.42203900  | -0.59099900 | 2.04674700 |
| H | 0.37287900  | -0.78095800 | 1.82900100 |
| H | 1.49893800  | -0.00237600 | 2.97060600 |
| C | 2.24652500  | -1.87010800 | 2.11118400 |

|   |             |             |             |
|---|-------------|-------------|-------------|
| H | 1.87990900  | -2.57535500 | 1.35797200  |
| H | 2.19654400  | -2.34693700 | 3.09115100  |
| C | 3.65106800  | -1.38140300 | 1.75626000  |
| H | 4.10714200  | -0.88423800 | 2.61702400  |
| H | 4.32600100  | -2.16850900 | 1.41732000  |
| C | 2.24944600  | 1.89633200  | -0.75495600 |
| H | 3.31462300  | 1.91646900  | -0.51134500 |
| H | 2.14876000  | 1.27782400  | -1.65947000 |
| C | -0.63564600 | -0.12700800 | -0.56011200 |
| H | -0.74027000 | 0.56604600  | -1.40813900 |
| C | -1.93685900 | -0.46050400 | 0.16696400  |
| O | 0.21844500  | -1.05475500 | -0.58726200 |
| C | 3.57946400  | -0.95844800 | -0.74364400 |
| O | 2.52715500  | -1.30292300 | -1.44512400 |
| O | 4.71361700  | -1.13929600 | -1.14840700 |
| C | -2.90455300 | 0.64787800  | 0.53289300  |
| H | -2.38989000 | 1.31096500  | 1.23770100  |
| C | -4.18806200 | 0.15987400  | 1.20761000  |
| H | -4.81278500 | -0.36371200 | 0.47827400  |
| H | -3.93011100 | -0.57277600 | 1.98285100  |
| H | -1.71536400 | -1.11131500 | 1.01539200  |
| H | -3.14999500 | 1.24012800  | -0.35695300 |
| C | -4.96600700 | 1.32132500  | 1.82180700  |
| H | -4.37736200 | 1.82370600  | 2.59611700  |
| H | -5.89795200 | 0.97642600  | 2.27715700  |
| H | -5.22040200 | 2.06482000  | 1.05916500  |
| H | 1.58710300  | -1.11458900 | -1.04588000 |
| C | 1.75069900  | 3.31043900  | -1.04557800 |



|    |             |             |             |
|----|-------------|-------------|-------------|
| C  | -0.44550100 | 2.83449200  | 0.05235400  |
| H  | 2.01590900  | 3.97214900  | -0.21168800 |
| H  | 2.25804200  | 3.69126300  | -1.93623300 |
| H  | -1.51277600 | 2.69867200  | -0.14024300 |
| H  | -0.37593400 | 3.63085600  | 0.80650200  |
| C  | 0.23935200  | 3.30259400  | -1.23122300 |
| H  | -0.12629200 | 4.29835100  | -1.49888300 |
| H  | -0.01807000 | 2.63502700  | -2.06428200 |
| Br | -2.85335000 | -1.66231800 | -1.12205200 |

(R)-TS2<sub>G</sub>-Br-P

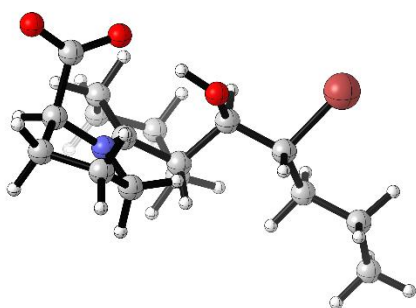

-----  
 - Thermochemistry -  
 -----

|                                              |                             |
|----------------------------------------------|-----------------------------|
| Zero-point correction=                       | 0.413288 (Hartree/Particle) |
| Thermal correction to Energy=                | 0.431284                    |
| Thermal correction to Enthalpy=              | 0.432149                    |
| Thermal correction to Gibbs Free Energy=     | 0.368128                    |
| Sum of electronic and zero-point Energies=   | -3476.865993                |
| Sum of electronic and thermal Energies=      | -3476.847998                |
| Sum of electronic and thermal Enthalpies=    | -3476.847133                |
| Sum of electronic and thermal Free Energies= | -3476.911154                |

Number of Imaginary Frequencies = 0

E (Single Point Energy) [IEFPCM(DCM)M06-2X/6-311++G(2d,2p)] = -3479.885376

|   |             |            |            |
|---|-------------|------------|------------|
| C | -0.00853500 | 1.15004100 | 0.40904000 |
| H | -0.17295500 | 0.93543900 | 1.46896800 |

|   |             |             |             |
|---|-------------|-------------|-------------|
| C | 1.46756900  | 1.04765800  | 0.11448400  |
| N | 2.22281800  | 0.29517300  | 0.84219500  |
| C | 3.62594900  | -0.04937600 | 0.51197500  |
| H | 4.19409600  | 0.85847600  | 0.30560400  |
| C | 1.75905000  | -0.49458800 | 2.02288100  |
| H | 0.79775700  | -0.95120300 | 1.79839100  |
| H | 1.66786800  | 0.19512900  | 2.86770800  |
| C | 2.87362400  | -1.51427600 | 2.23655100  |
| H | 2.69606200  | -2.39309300 | 1.60886700  |
| H | 2.92443900  | -1.83564500 | 3.27748700  |
| C | 4.12145800  | -0.76851600 | 1.76573000  |
| H | 4.44229200  | -0.04142700 | 2.51832500  |
| H | 4.96054500  | -1.41985400 | 1.52243500  |
| C | 1.99022900  | 1.72219300  | -1.12032700 |
| H | 3.07766300  | 1.69389000  | -1.16284000 |
| H | 1.63558200  | 1.10882000  | -1.96178300 |
| C | -0.71324100 | 0.01926700  | -0.43575500 |
| H | -0.92007700 | 0.42746600  | -1.43601200 |
| C | -2.02897900 | -0.44502300 | 0.20713100  |
| O | 0.05908000  | -1.15311700 | -0.51030800 |
| C | 3.68674400  | -0.96451800 | -0.76457100 |
| O | 2.60880800  | -1.19519800 | -1.37212800 |
| O | 4.83136400  | -1.35331800 | -1.04402800 |
| C | -3.02112700 | 0.60161600  | 0.68128300  |
| H | -2.50495400 | 1.22359500  | 1.42450500  |
| C | -4.26437200 | 0.02032000  | 1.35635500  |
| H | -4.88870400 | -0.47794800 | 0.60922200  |
| H | -3.95575900 | -0.75211000 | 2.07213700  |

|    |             |             |             |
|----|-------------|-------------|-------------|
| H  | -1.77399900 | -1.12901100 | 1.02162300  |
| H  | -3.31620200 | 1.25392500  | -0.14984100 |
| C  | -5.06896300 | 1.10596300  | 2.06732500  |
| H  | -4.47892900 | 1.58021200  | 2.85822700  |
| H  | -5.97295700 | 0.69355700  | 2.52285800  |
| H  | -5.37484100 | 1.88687800  | 1.36325100  |
| H  | 0.94645600  | -1.04994800 | -0.93038700 |
| C  | 1.46090500  | 3.15094700  | -1.28145300 |
| C  | -0.53144700 | 2.57495300  | 0.11223800  |
| H  | 1.86879500  | 3.79050700  | -0.48961600 |
| H  | 1.82157900  | 3.54512400  | -2.23479300 |
| H  | -1.61956900 | 2.58183600  | 0.15077800  |
| H  | -0.18754100 | 3.23014400  | 0.92165800  |
| C  | -0.05955300 | 3.15347100  | -1.21977600 |
| H  | -0.44698400 | 4.17116500  | -1.32243400 |
| H  | -0.46351700 | 2.57494800  | -2.05990800 |
| Br | -2.92130700 | -1.60042300 | -1.11505000 |

(S)-TS<sub>2G</sub>-Br-Pre

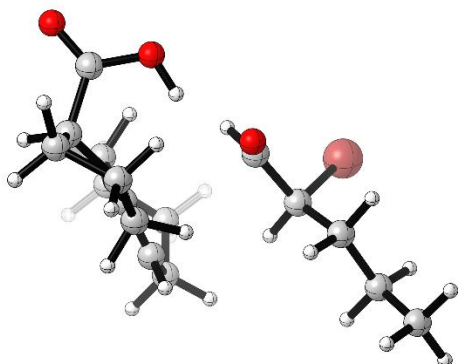

-----  
 - Thermochemistry -  
 -----

Zero-point correction=

0.408825 (Hartree/Particle)

|                                              |              |
|----------------------------------------------|--------------|
| Thermal correction to Energy=                | 0.428488     |
| Thermal correction to Enthalpy=              | 0.429353     |
| Thermal correction to Gibbs Free Energy=     | 0.360308     |
| Sum of electronic and zero-point Energies=   | -3476.855490 |
| Sum of electronic and thermal Energies=      | -3476.835827 |
| Sum of electronic and thermal Enthalpies=    | -3476.834962 |
| Sum of electronic and thermal Free Energies= | -3476.904008 |

Number of Imaginary Frequencies = 0

E (Single Point Energy) [IEFPCM<sub>(DCM)</sub>M06-2X/6-311++G(2d,2p)] = -3479.871179

|   |             |             |             |
|---|-------------|-------------|-------------|
| C | -0.45443400 | 0.51994300  | -2.02113400 |
| H | -0.27509400 | -0.44780000 | -2.48087000 |
| C | -1.45229600 | 0.65825100  | -1.11881400 |
| N | -2.18101600 | -0.43512100 | -0.64598100 |
| C | -3.52107900 | -0.29770100 | -0.08337600 |
| H | -4.11447900 | 0.48408200  | -0.56609400 |
| C | -1.97197100 | -1.76495200 | -1.21733600 |
| H | -0.93446500 | -2.07896600 | -1.06554100 |
| H | -2.17973600 | -1.76528100 | -2.29932000 |
| C | -2.97388700 | -2.62716200 | -0.45842000 |
| H | -2.56696600 | -2.89927800 | 0.52174200  |
| H | -3.22497200 | -3.54589700 | -0.99121500 |
| C | -4.17087400 | -1.68432100 | -0.31028900 |
| H | -4.73897900 | -1.65098200 | -1.24390700 |
| H | -4.85667300 | -1.95681100 | 0.49454000  |
| C | -1.77710200 | 1.99299900  | -0.47864100 |
| H | -2.85226400 | 2.18837800  | -0.55092800 |
| H | -1.55732400 | 1.93518000  | 0.59811600  |
| C | 0.43778500  | 2.78175200  | -1.39915000 |
| C | 0.63423800  | -0.25328800 | 0.86346700  |
| H | 0.20265000  | 0.72944200  | 1.12075800  |

|    |             |             |             |
|----|-------------|-------------|-------------|
| C  | 1.97743300  | -0.21680000 | 0.17408000  |
| H  | 1.88670800  | 0.35750700  | -0.74929300 |
| O  | 0.06136200  | -1.28347500 | 1.15013000  |
| C  | -3.50075600 | 0.03673900  | 1.40905800  |
| O  | -2.41926700 | -0.32762000 | 2.09714000  |
| O  | -4.44066500 | 0.56503800  | 1.96133200  |
| H  | -1.73038000 | -0.72170700 | 1.51828800  |
| C  | 2.59821200  | -1.57705200 | -0.05087600 |
| H  | 1.84481700  | -2.16998300 | -0.58808200 |
| C  | 3.88926800  | -1.53745200 | -0.86356800 |
| H  | 3.71078700  | -0.98461800 | -1.79484100 |
| H  | 2.75767000  | -2.07047900 | 0.91448200  |
| C  | 4.39503800  | -2.94226800 | -1.18236700 |
| H  | 5.32720500  | -2.90744800 | -1.75198800 |
| H  | 4.58302500  | -3.50546400 | -0.26259200 |
| H  | 3.65921500  | -3.49876800 | -1.77157700 |
| H  | 4.65279500  | -0.98187000 | -0.30805300 |
| C  | 0.45803500  | 1.65204900  | -2.42722900 |
| C  | -1.01084200 | 3.16224800  | -1.10529200 |
| H  | 1.47922300  | 1.27299400  | -2.56786200 |
| H  | 0.16167000  | 2.05059800  | -3.40811400 |
| H  | -1.49565000 | 3.45026500  | -2.04644200 |
| H  | -1.06699800 | 4.02717800  | -0.43821500 |
| H  | 0.92834200  | 2.45831700  | -0.46940600 |
| H  | 1.00055300  | 3.64421900  | -1.76897300 |
| Br | 3.07755400  | 0.93096000  | 1.32650800  |

(S)-TS2<sub>G</sub>-Br

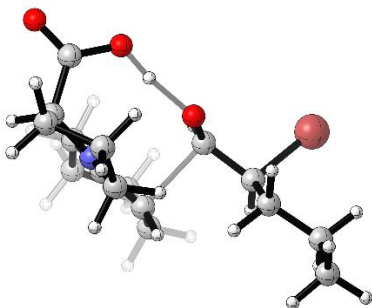

-----  
- Thermochemistry -  
-----

|                                              |                             |
|----------------------------------------------|-----------------------------|
| Zero-point correction=                       | 0.408948 (Hartree/Particle) |
| Thermal correction to Energy=                | 0.427032                    |
| Thermal correction to Enthalpy=              | 0.427897                    |
| Thermal correction to Gibbs Free Energy=     | 0.363804                    |
| Sum of electronic and zero-point Energies=   | -3476.846872                |
| Sum of electronic and thermal Energies=      | -3476.828788                |
| Sum of electronic and thermal Enthalpies=    | -3476.827923                |
| Sum of electronic and thermal Free Energies= | -3476.892016                |

Number of Imaginary Frequencies = 1

E (Single Point Energy) [IEFPCM<sub>(DCM)</sub>M06-2X/6-311++G(2d,2p)] = -3479.861757

|   |             |             |             |
|---|-------------|-------------|-------------|
| C | -0.29237000 | 0.91811500  | -1.49358600 |
| H | 0.13052400  | 0.09754900  | -2.06656500 |
| C | -1.55985600 | 0.72975600  | -0.94659600 |
| N | -2.05664600 | -0.50083500 | -0.74346100 |
| C | -3.31403700 | -0.78386200 | -0.04529500 |
| H | -4.13414300 | -0.18030100 | -0.43961500 |
| C | -1.45098800 | -1.72666200 | -1.29729500 |
| H | -0.37662000 | -1.72894900 | -1.12828700 |
| H | -1.65364700 | -1.77340100 | -2.37557400 |
| C | -2.15458200 | -2.84032400 | -0.53123000 |
| H | -1.65731900 | -2.98799600 | 0.43334800  |
| H | -2.14651900 | -3.78595400 | -1.07529100 |

|   |             |             |             |
|---|-------------|-------------|-------------|
| C | -3.56224300 | -2.27848100 | -0.33105300 |
| H | -4.14122000 | -2.37021900 | -1.25442600 |
| H | -4.12327900 | -2.75478100 | 0.47432500  |
| C | -2.32610700 | 1.89976200  | -0.37177800 |
| H | -3.40061100 | 1.72125300  | -0.45411400 |
| H | -2.10395000 | 1.95435600  | 0.70534000  |
| C | -0.45748300 | 3.42192100  | -1.08284700 |
| C | 0.63631300  | 0.40332300  | 0.44116300  |
| H | 0.41972100  | 1.41115800  | 0.82203900  |
| C | 2.05004100  | 0.22121300  | -0.08437600 |
| H | 2.34083600  | 1.00358300  | -0.78247400 |
| O | 0.05687300  | -0.59723300 | 0.94442800  |
| C | -3.28263800 | -0.51467500 | 1.46893400  |
| O | -2.13008200 | -0.41108800 | 2.08406300  |
| O | -4.34346600 | -0.43620600 | 2.06272000  |
| H | -1.24808800 | -0.48284500 | 1.52383500  |
| C | 2.35682200  | -1.17009500 | -0.59884300 |
| H | 1.69919600  | -1.33560700 | -1.46384100 |
| C | 3.80169300  | -1.37288100 | -1.05289700 |
| H | 4.11389800  | -0.51757000 | -1.66562300 |
| H | 2.07637200  | -1.90653600 | 0.16089400  |
| C | 3.96085600  | -2.66817000 | -1.84563500 |
| H | 5.00160500  | -2.82737600 | -2.13960500 |
| H | 3.64505500  | -3.53000800 | -1.24853400 |
| H | 3.35195000  | -2.64984100 | -2.75528900 |
| H | 4.46005800  | -1.38728100 | -0.17869900 |
| C | 0.18947800  | 2.29908600  | -1.89346200 |
| C | -1.96867700 | 3.22751400  | -1.04117400 |

|    |             |            |             |
|----|-------------|------------|-------------|
| H  | 1.28023100  | 2.35982500 | -1.81221300 |
| H  | -0.03217300 | 2.45459700 | -2.95849400 |
| H  | -2.36699300 | 3.23671800 | -2.06335800 |
| H  | -2.45575500 | 4.04169000 | -0.49751200 |
| H  | -0.06378900 | 3.43119100 | -0.05841000 |
| H  | -0.20484200 | 4.38942000 | -1.52658500 |
| Br | 3.18748800  | 0.58817600 | 1.50100200  |

(S)-TS<sub>2G</sub>-Br-P

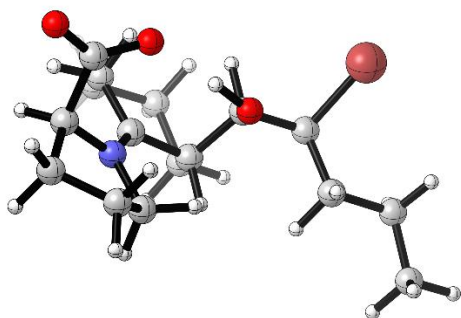

-----  
- Thermochemistry -  
-----

|                                              |                             |
|----------------------------------------------|-----------------------------|
| Zero-point correction=                       | 0.413496 (Hartree/Particle) |
| Thermal correction to Energy=                | 0.431581                    |
| Thermal correction to Enthalpy=              | 0.432446                    |
| Thermal correction to Gibbs Free Energy=     | 0.368030                    |
| Sum of electronic and zero-point Energies=   | -3476.872903                |
| Sum of electronic and thermal Energies=      | -3476.854818                |
| Sum of electronic and thermal Enthalpies=    | -3476.853953                |
| Sum of electronic and thermal Free Energies= | -3476.918369                |

Number of Imaginary Frequencies = 0

E (Single Point Energy) [IEFPCM(DCM)M06-2X/6-311++G(2d,2p)] = -3479.891844

|   |             |             |             |
|---|-------------|-------------|-------------|
| C | -0.06948000 | 0.67345200  | -1.12478800 |
| H | 0.07965500  | -0.17879400 | -1.78857400 |
| C | -1.51537000 | 0.75681100  | -0.72238300 |
| N | -2.28125300 | -0.27936600 | -0.80187700 |



|   |             |             |             |
|---|-------------|-------------|-------------|
| C | -3.59883900 | -0.37968000 | -0.13503900 |
| H | -4.21617200 | 0.48550000  | -0.37638900 |
| C | -1.89404100 | -1.60133300 | -1.38587500 |
| H | -0.88201500 | -1.85652500 | -1.08116300 |
| H | -1.95369200 | -1.50549500 | -2.47439500 |
| C | -2.94585800 | -2.56280400 | -0.83963100 |
| H | -2.62699700 | -2.94483400 | 0.13507000  |
| H | -3.09681000 | -3.40896200 | -1.51101300 |
| C | -4.18370200 | -1.67976400 | -0.68509500 |
| H | -4.65317900 | -1.50045900 | -1.65741000 |
| H | -4.93103300 | -2.08275800 | -0.00158600 |
| C | -1.97501800 | 2.03734400  | -0.08633700 |
| H | -3.05889200 | 2.06652200  | 0.01615600  |
| H | -1.57069000 | 2.03098700  | 0.93526300  |
| C | 0.03815900  | 3.22451500  | -1.07692100 |
| C | 0.68458900  | 0.36553600  | 0.21962800  |
| H | 0.51564900  | 1.19806800  | 0.91499700  |
| C | 2.19166400  | 0.25584000  | -0.00805300 |
| H | 2.59201700  | 1.19338300  | -0.39529200 |
| O | 0.22293000  | -0.83903700 | 0.77183900  |
| C | -3.40071700 | -0.43237300 | 1.42311100  |
| O | -2.22205500 | -0.38057200 | 1.86536000  |
| O | -4.46217400 | -0.51827100 | 2.05895300  |
| H | -0.64648000 | -0.69367000 | 1.21707100  |
| C | 2.61321600  | -0.92838200 | -0.86066300 |
| H | 2.11450400  | -0.81478200 | -1.83463800 |
| C | 4.11712700  | -1.02577500 | -1.11273800 |
| H | 4.50138200  | -0.03555000 | -1.38957600 |

|    |             |             |             |
|----|-------------|-------------|-------------|
| H  | 2.23183300  | -1.85087000 | -0.41047600 |
| C  | 4.43921000  | -2.03703000 | -2.21060200 |
| H  | 5.51801200  | -2.12578600 | -2.36308400 |
| H  | 4.05443300  | -3.02845700 | -1.94963800 |
| H  | 3.98657400  | -1.74207000 | -3.16285300 |
| H  | 4.62507600  | -1.30867100 | -0.18553000 |
| C  | 0.39056700  | 1.95254400  | -1.84635400 |
| C  | -1.46930900 | 3.27812400  | -0.84027900 |
| H  | 1.46282200  | 1.88892200  | -2.05078000 |
| H  | -0.10383200 | 1.98293300  | -2.82484600 |
| H  | -1.98612000 | 3.35072500  | -1.80468400 |
| H  | -1.74510400 | 4.16297900  | -0.26125700 |
| H  | 0.57128400  | 3.26188700  | -0.11871900 |
| H  | 0.35771300  | 4.09964300  | -1.64968200 |
| Br | 3.02817300  | 0.10950200  | 1.76768700  |

**(R)-TS2<sub>0</sub>-Br-Pre**

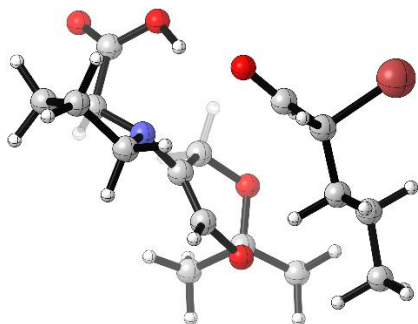

-----  
 - Thermochemistry -  
 -----

|                                            |                             |
|--------------------------------------------|-----------------------------|
| Zero-point correction=                     | 0.416888 (Hartree/Particle) |
| Thermal correction to Energy=              | 0.438271                    |
| Thermal correction to Enthalpy=            | 0.439136                    |
| Thermal correction to Gibbs Free Energy=   | 0.366796                    |
| Sum of electronic and zero-point Energies= | -3627.231271                |

|                                              |              |
|----------------------------------------------|--------------|
| Sum of electronic and thermal Energies=      | -3627.209888 |
| Sum of electronic and thermal Enthalpies=    | -3627.209023 |
| Sum of electronic and thermal Free Energies= | -3627.281363 |

Number of Imaginary Frequencies = 0

E (Single Point Energy) [IEFPCM<sub>(DCM)</sub>M06-2X/6-311++G(2d,2p)] = -3630.304563

|   |             |             |             |
|---|-------------|-------------|-------------|
| C | 0.56848300  | 1.42459900  | 1.15506900  |
| H | 0.42870000  | 1.14218500  | 2.19135500  |
| C | 1.38012700  | 0.78196600  | 0.29687600  |
| N | 2.11703400  | -0.36007000 | 0.62963200  |
| C | 3.47602300  | -0.51815000 | 0.10469500  |
| H | 3.96416200  | 0.43855400  | -0.11162300 |
| C | 2.01936600  | -0.88835800 | 1.98935900  |
| H | 1.01102000  | -1.27920200 | 2.16362500  |
| H | 2.22678300  | -0.10475900 | 2.73687800  |
| C | 3.10843600  | -1.95345400 | 2.01572000  |
| H | 2.76123600  | -2.85863900 | 1.50616000  |
| H | 3.41018300  | -2.22018000 | 3.02990900  |
| C | 4.23098300  | -1.27585200 | 1.22369500  |
| H | 4.74467600  | -0.54616800 | 1.85548400  |
| H | 4.97636600  | -1.96500400 | 0.82276300  |
| C | 1.43058900  | 1.23883700  | -1.14041900 |
| H | 2.40021100  | 1.69417500  | -1.39287000 |
| H | 1.27789300  | 0.38768000  | -1.81317400 |
| O | -0.18451800 | 2.51856000  | 0.80381400  |
| O | 0.36996700  | 2.14105100  | -1.41026600 |
| C | 0.20992200  | 3.14142900  | -0.42103600 |
| C | -0.94591800 | 4.01117500  | -0.86429000 |
| H | -1.80737700 | 3.38748100  | -1.10911900 |

|    |             |             |             |
|----|-------------|-------------|-------------|
| H  | -0.65575500 | 4.58529200  | -1.74678300 |
| C  | 1.48673800  | 3.94930600  | -0.20328100 |
| H  | 1.26376700  | 4.80066800  | 0.44322300  |
| H  | 1.85094600  | 4.32011500  | -1.16486500 |
| H  | 2.27052000  | 3.35553500  | 0.27176900  |
| C  | -0.97716100 | -1.20207000 | -0.29251500 |
| H  | -0.97781600 | -0.39582300 | -1.04698700 |
| C  | -2.18142200 | -1.29882100 | 0.61414600  |
| O  | -0.06678700 | -2.00246700 | -0.22369600 |
| C  | 3.50920700  | -1.32990800 | -1.19330500 |
| O  | 2.41458200  | -2.01509200 | -1.50666000 |
| O  | 4.50217900  | -1.37697600 | -1.88673200 |
| H  | -1.21654700 | 4.69942300  | -0.06061000 |
| C  | -2.67176300 | 0.01158600  | 1.21242400  |
| H  | -3.51385900 | -0.21967100 | 1.87486600  |
| C  | -3.07938500 | 1.09653500  | 0.21817700  |
| H  | -2.23370000 | 1.33503100  | -0.43759700 |
| H  | -3.88703300 | 0.71990800  | -0.41867100 |
| H  | -1.86175900 | 0.38769900  | 1.85191400  |
| C  | -3.53364600 | 2.36256700  | 0.94037600  |
| H  | -3.87702300 | 3.12037700  | 0.23053400  |
| H  | -4.36099400 | 2.14422100  | 1.62397400  |
| H  | -2.70838700 | 2.79026600  | 1.51812200  |
| H  | 1.68695500  | -1.84671400 | -0.86473100 |
| H  | -1.97313600 | -2.03943100 | 1.38650700  |
| Br | -3.55674700 | -2.13547000 | -0.51123700 |

(R)-TS2<sub>o</sub>-Br

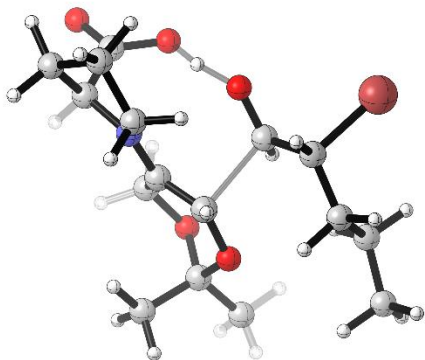

-----  
- Thermochemistry -  
-----

|                                              |                             |
|----------------------------------------------|-----------------------------|
| Zero-point correction=                       | 0.415814 (Hartree/Particle) |
| Thermal correction to Energy=                | 0.435581                    |
| Thermal correction to Enthalpy=              | 0.436446                    |
| Thermal correction to Gibbs Free Energy=     | 0.369445                    |
| Sum of electronic and zero-point Energies=   | -3627.219690                |
| Sum of electronic and thermal Energies=      | -3627.199924                |
| Sum of electronic and thermal Enthalpies=    | -3627.199059                |
| Sum of electronic and thermal Free Energies= | -3627.266059                |

Number of Imaginary Frequencies = 1

E (Single Point Energy) [IEFPCM(DCM)M06-2X/6-311++G(2d,2p)] = -3630.289223

|   |             |             |             |
|---|-------------|-------------|-------------|
| C | -0.02963900 | 0.97221200  | 0.91302300  |
| H | -0.17980400 | 0.58414600  | 1.91630200  |
| C | 1.24423500  | 0.96915000  | 0.34581000  |
| N | 2.17701700  | 0.10312400  | 0.72712400  |
| C | 3.48121200  | -0.03875400 | 0.07116000  |
| H | 3.91513800  | 0.94210000  | -0.14353900 |
| C | 2.07452500  | -0.71380500 | 1.95331700  |
| H | 1.12209300  | -1.24246200 | 1.97602000  |
| H | 2.15218700  | -0.05194000 | 2.82554100  |
| C | 3.26919500  | -1.65528000 | 1.83607300  |

|   |             |             |             |
|---|-------------|-------------|-------------|
| H | 2.99630900  | -2.52054000 | 1.22299300  |
| H | 3.60628900  | -2.01259100 | 2.80978300  |
| C | 4.31458700  | -0.79817900 | 1.11814600  |
| H | 4.75895300  | -0.07936700 | 1.81239200  |
| H | 5.11538900  | -1.37082400 | 0.64966300  |
| C | 1.49993200  | 1.82805400  | -0.86820000 |
| H | 2.31692800  | 2.53340900  | -0.65672100 |
| H | 1.79798900  | 1.20668700  | -1.71904800 |
| O | -0.93426300 | 1.97099400  | 0.59006300  |
| O | 0.32684000  | 2.50020000  | -1.26840000 |
| C | -0.42014600 | 3.04601000  | -0.19568500 |
| C | -1.61303300 | 3.74198700  | -0.81177000 |
| H | -2.15022300 | 3.04662300  | -1.46042900 |
| H | -1.27491100 | 4.59752900  | -1.40006300 |
| C | 0.41442400  | 3.98132300  | 0.67490600  |
| H | -0.24411800 | 4.48874200  | 1.38252300  |
| H | 0.90390500  | 4.72903600  | 0.04560900  |
| H | 1.17643000  | 3.44704900  | 1.24751700  |
| C | -0.60094700 | -0.72918000 | -0.21475700 |
| H | -0.84675300 | -0.08799600 | -1.07392400 |
| C | -1.78213900 | -1.17988200 | 0.63844400  |
| O | 0.35933300  | -1.55898300 | -0.29690900 |
| C | 3.45504200  | -0.79432000 | -1.27521400 |
| O | 2.34974600  | -1.35381800 | -1.68398500 |
| O | 4.49091800  | -0.82898100 | -1.91672000 |
| H | -2.28276600 | 4.09114700  | -0.02345500 |
| C | -2.89193000 | -0.19692900 | 0.97684300  |
| H | -3.63859200 | -0.73517100 | 1.57157700  |

|    |             |             |             |
|----|-------------|-------------|-------------|
| C  | -3.57334300 | 0.47792400  | -0.21219100 |
| H  | -2.81581300 | 0.89740700  | -0.88159400 |
| H  | -4.13108300 | -0.26859500 | -0.78760800 |
| H  | -2.47024000 | 0.57295500  | 1.63187100  |
| C  | -4.50945400 | 1.59249200  | 0.24699100  |
| H  | -4.99460700 | 2.07963200  | -0.60342300 |
| H  | -5.29300000 | 1.20089500  | 0.90454200  |
| H  | -3.95328400 | 2.35459700  | 0.80320000  |
| H  | 1.48786300  | -1.36602300 | -1.04656200 |
| H  | -1.39034900 | -1.65284600 | 1.54070400  |
| Br | -2.56167900 | -2.71307700 | -0.34878600 |

(*R*)-TS2<sub>o</sub>-Br-P

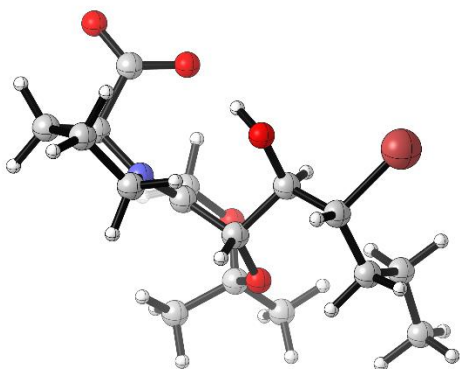

-----  
- Thermochemistry -  
-----

|                                              |                             |
|----------------------------------------------|-----------------------------|
| Zero-point correction=                       | 0.419636 (Hartree/Particle) |
| Thermal correction to Energy=                | 0.439624                    |
| Thermal correction to Enthalpy=              | 0.440489                    |
| Thermal correction to Gibbs Free Energy=     | 0.372588                    |
| Sum of electronic and zero-point Energies=   | -3627.242525                |
| Sum of electronic and thermal Energies=      | -3627.222537                |
| Sum of electronic and thermal Enthalpies=    | -3627.221672                |
| Sum of electronic and thermal Free Energies= | -3627.289573                |

Number of Imaginary Frequencies = 0

E (Single Point Energy) [IEFPCM(DCM)M06-2X/6-311++G(2d,2p)] = -3630.315195

|   |             |             |             |
|---|-------------|-------------|-------------|
| C | -0.07186600 | 0.64358700  | 0.74179400  |
| H | -0.00607400 | 0.41820800  | 1.81199400  |
| C | 1.30414900  | 0.81108500  | 0.15243100  |
| N | 2.32377800  | 0.20239900  | 0.64106400  |
| C | 3.61878100  | 0.09854100  | -0.06186800 |
| H | 3.90055600  | 1.07079600  | -0.47307300 |
| C | 2.34284000  | -0.59859400 | 1.90439700  |
| H | 1.47937000  | -1.25949800 | 1.92832200  |
| H | 2.30803200  | 0.11471100  | 2.73380100  |
| C | 3.67841800  | -1.33631600 | 1.83741000  |
| H | 3.55190600  | -2.28561800 | 1.30790900  |
| H | 4.06478400  | -1.54554000 | 2.83531000  |
| C | 4.56905600  | -0.39232600 | 1.02670700  |
| H | 4.90774100  | 0.44623600  | 1.64262800  |
| H | 5.43467400  | -0.88091600 | 0.58079100  |
| C | 1.41714700  | 1.62400400  | -1.10998700 |
| H | 2.25559000  | 2.32892300  | -1.02548900 |
| H | 1.61258000  | 0.94680900  | -1.94787000 |
| O | -0.89524400 | 1.78310600  | 0.58431300  |
| O | 0.20795800  | 2.29390400  | -1.37430700 |
| C | -0.39454600 | 2.85117500  | -0.22019600 |
| C | -1.59342300 | 3.64156100  | -0.69553200 |
| H | -2.21432900 | 3.01903000  | -1.34257400 |
| H | -1.25528200 | 4.51706500  | -1.25375200 |
| C | 0.57054600  | 3.71252500  | 0.59367000  |
| H | 0.00272200  | 4.23493800  | 1.36574400  |
| H | 1.05130600  | 4.44980100  | -0.05441900 |



|    |             |             |             |
|----|-------------|-------------|-------------|
| H  | 1.34621800  | 3.12816500  | 1.09756500  |
| C  | -0.69579400 | -0.59532600 | -0.01449000 |
| H  | -0.94716600 | -0.25312600 | -1.02862100 |
| C  | -1.94621400 | -1.09101600 | 0.71862900  |
| O  | 0.20487000  | -1.66589600 | -0.02105300 |
| C  | 3.50420500  | -0.91768800 | -1.26587700 |
| O  | 2.35083500  | -1.31094400 | -1.58471900 |
| O  | 4.59151600  | -1.19390100 | -1.78667400 |
| H  | -2.18094100 | 3.96980700  | 0.16394100  |
| C  | -3.05164900 | -0.09281800 | 1.02720400  |
| H  | -3.81850300 | -0.61726000 | 1.60847000  |
| C  | -3.69429000 | 0.57828700  | -0.18435500 |
| H  | -2.91132000 | 0.97011500  | -0.84198300 |
| H  | -4.24926800 | -0.16805600 | -0.76235600 |
| H  | -2.62765700 | 0.67473200  | 1.68526300  |
| C  | -4.62759900 | 1.71152200  | 0.23280800  |
| H  | -5.07980000 | 2.19481500  | -0.63779600 |
| H  | -5.43644800 | 1.33758800  | 0.86953300  |
| H  | -4.08220600 | 2.47436300  | 0.79853800  |
| H  | 0.93954800  | -1.53444400 | -0.67046400 |
| H  | -1.61169100 | -1.57258900 | 1.64115600  |
| Br | -2.68453800 | -2.59243400 | -0.31877100 |

(S)-TS2<sub>o</sub>-Br-Pre

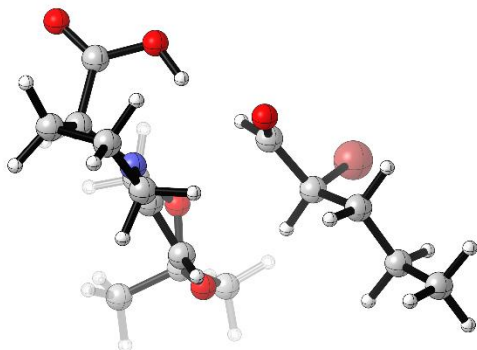

-----  
- Thermochemistry -  
-----

|                                              |                             |
|----------------------------------------------|-----------------------------|
| Zero-point correction=                       | 0.416363 (Hartree/Particle) |
| Thermal correction to Energy=                | 0.438035                    |
| Thermal correction to Enthalpy=              | 0.438900                    |
| Thermal correction to Gibbs Free Energy=     | 0.365643                    |
| Sum of electronic and zero-point Energies=   | -3627.237041                |
| Sum of electronic and thermal Energies=      | -3627.215369                |
| Sum of electronic and thermal Enthalpies=    | -3627.214504                |
| Sum of electronic and thermal Free Energies= | -3627.287761                |

Number of Imaginary Frequencies = 0

E (Single Point Energy) [IEFPCM(DCM)M06-2X/6-311++G(2d,2p)] = -3630.306273

|   |            |             |             |
|---|------------|-------------|-------------|
| C | 0.39350900 | 0.85467000  | 1.59406200  |
| H | 0.30557600 | 0.19223300  | 2.44618200  |
| C | 1.34215700 | 0.75132700  | 0.64500900  |
| N | 2.29612400 | -0.26840400 | 0.62732700  |
| C | 3.59241000 | -0.06413100 | -0.01815600 |
| H | 3.87580500 | 0.99116600  | -0.08724000 |
| C | 2.41069400 | -1.14998100 | 1.79082000  |
| H | 1.52739300 | -1.79410500 | 1.85983900  |
| H | 2.48679800 | -0.55895100 | 2.71780500  |
| C | 3.70308000 | -1.91448200 | 1.52241700  |
| H | 3.51712400 | -2.74092900 | 0.82805000  |

|   |             |             |             |
|---|-------------|-------------|-------------|
| H | 4.13979600  | -2.32489300 | 2.43414000  |
| C | 4.58526500  | -0.84491100 | 0.87110100  |
| H | 4.97798400  | -0.16736600 | 1.63432000  |
| H | 5.42494600  | -1.24316600 | 0.29892800  |
| C | 1.28840300  | 1.69431400  | -0.53246000 |
| H | 2.02616000  | 2.50416500  | -0.44992800 |
| H | 1.48686800  | 1.16395600  | -1.46974100 |
| O | -0.63954600 | 1.76126400  | 1.54198700  |
| O | -0.02480000 | 2.21944800  | -0.65264200 |
| C | -0.52033000 | 2.78463700  | 0.54689400  |
| C | -1.92709900 | 3.25738200  | 0.25102500  |
| H | -2.40761100 | 3.58086100  | 1.17644500  |
| H | -1.89602800 | 4.09288200  | -0.45153400 |
| C | 0.37679900  | 3.89563300  | 1.07961100  |
| H | -0.13446100 | 4.40522600  | 1.89875400  |
| H | 0.58253500  | 4.61696900  | 0.28451500  |
| H | 1.32097100  | 3.50080100  | 1.46223800  |
| C | -0.52634000 | -1.01427400 | -0.80496900 |
| H | -0.17805000 | -0.26999000 | -1.54214200 |
| C | -1.85927800 | -0.70892400 | -0.16563000 |
| O | 0.12645600  | -2.00530600 | -0.55067600 |
| C | 3.61809400  | -0.61632700 | -1.44808400 |
| O | 2.61730000  | -1.41669100 | -1.80817600 |
| O | 4.52304600  | -0.36073000 | -2.21134200 |
| H | -2.50583900 | 2.44151300  | -0.19030200 |
| C | -2.41262900 | -1.82129100 | 0.69655800  |
| H | -2.55710900 | -2.72289400 | 0.09000000  |
| C | -3.69765000 | -1.44694700 | 1.43024700  |

|    |             |             |             |
|----|-------------|-------------|-------------|
| H  | -3.54326500 | -0.50034000 | 1.96409300  |
| H  | -4.49405700 | -1.26972100 | 0.69912700  |
| H  | -1.62566900 | -2.05486300 | 1.42732200  |
| C  | -4.12496400 | -2.53545500 | 2.41191500  |
| H  | -4.28571600 | -3.48574000 | 1.89248600  |
| H  | -3.35793200 | -2.69696700 | 3.17610500  |
| H  | -5.05551800 | -2.26791400 | 2.91912700  |
| H  | 1.96094300  | -1.52099500 | -1.08374300 |
| H  | -1.77249600 | 0.23166000  | 0.38673300  |
| Br | -3.03326800 | -0.24385900 | -1.67109200 |

(S)-TS2<sub>o</sub>-Br

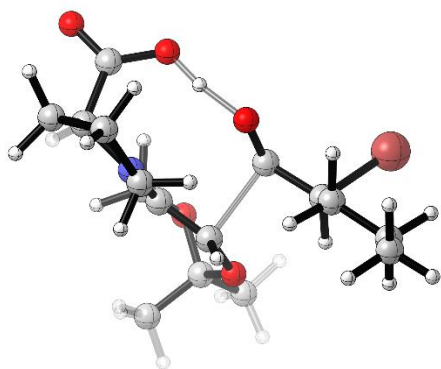

-----  
 - Thermochemistry -  
 -----

|                                              |                             |
|----------------------------------------------|-----------------------------|
| Zero-point correction=                       | 0.415358 (Hartree/Particle) |
| Thermal correction to Energy=                | 0.435442                    |
| Thermal correction to Enthalpy=              | 0.436307                    |
| Thermal correction to Gibbs Free Energy=     | 0.368103                    |
| Sum of electronic and zero-point Energies=   | -3627.225054                |
| Sum of electronic and thermal Energies=      | -3627.204970                |
| Sum of electronic and thermal Enthalpies=    | -3627.204105                |
| Sum of electronic and thermal Free Energies= | -3627.272308                |

Number of Imaginary Frequencies = 1

E (Single Point Energy) [IEFPCM(DCM)M06-2X/6-311++G(2d,2p)] = -3630.293793

|   |             |             |             |
|---|-------------|-------------|-------------|
| C | 0.18356100  | 0.85330300  | 1.06863300  |
| H | -0.17421500 | 0.25519300  | 1.90038100  |
| C | 1.46354600  | 0.65354700  | 0.55412000  |
| N | 2.10126300  | -0.50436000 | 0.69486800  |
| C | 3.35832100  | -0.83491200 | 0.01741000  |
| H | 4.04897000  | 0.01245200  | 0.04131400  |
| C | 1.68702200  | -1.55143500 | 1.65149200  |
| H | 0.63564000  | -1.79993400 | 1.50675000  |
| H | 1.84277100  | -1.17808800 | 2.67164300  |
| C | 2.61639800  | -2.71441600 | 1.31317500  |
| H | 2.18470700  | -3.30631500 | 0.49932900  |
| H | 2.77807600  | -3.37060400 | 2.16917400  |
| C | 3.89479600  | -2.01465200 | 0.84505600  |
| H | 4.45237700  | -1.62634300 | 1.70215000  |
| H | 4.55794900  | -2.64679500 | 0.25403200  |
| C | 2.04250700  | 1.70598300  | -0.35905000 |
| H | 2.97057700  | 2.10453200  | 0.07625000  |
| H | 2.28272300  | 1.27660400  | -1.33743500 |
| O | -0.42134900 | 2.09531400  | 1.01543900  |
| O | 1.10185100  | 2.72785800  | -0.60506100 |
| C | 0.39828000  | 3.16724800  | 0.54309600  |
| C | -0.54466200 | 4.25318800  | 0.07719200  |
| H | -1.19757600 | 4.55104300  | 0.89980200  |
| H | 0.02830700  | 5.11974200  | -0.25881200 |
| C | 1.33458400  | 3.63156800  | 1.65370400  |
| H | 0.74312900  | 4.09176400  | 2.44753900  |
| H | 2.03548800  | 4.37081300  | 1.25781100  |

|    |             |             |             |
|----|-------------|-------------|-------------|
| H  | 1.90013500  | 2.80461100  | 2.09067200  |
| C  | -0.64171400 | -0.15006100 | -0.55077400 |
| H  | -0.43993100 | 0.69907900  | -1.22182600 |
| C  | -2.05647400 | -0.16083600 | 0.00565000  |
| O  | -0.08004700 | -1.27384000 | -0.76237900 |
| C  | 3.20720200  | -1.22433500 | -1.46954400 |
| O  | 2.01888500  | -1.36369300 | -1.98676600 |
| O  | 4.23230300  | -1.38554500 | -2.11044700 |
| H  | -1.15088900 | 3.87586400  | -0.74925000 |
| C  | -2.37130600 | -1.37640300 | 0.85388400  |
| H  | -2.19339200 | -2.28210600 | 0.26572100  |
| C  | -3.77603600 | -1.38173600 | 1.45269500  |
| H  | -3.97503400 | -0.41077900 | 1.92355800  |
| H  | -4.51244600 | -1.49861900 | 0.65086100  |
| H  | -1.64140000 | -1.39071800 | 1.67668400  |
| C  | -3.94151700 | -2.50114200 | 2.47815700  |
| H  | -3.74469600 | -3.47718100 | 2.02257800  |
| H  | -3.24489300 | -2.37500800 | 3.31336400  |
| H  | -4.95582800 | -2.51941600 | 2.88538300  |
| H  | 1.12880700  | -1.28567900 | -1.37796000 |
| H  | -2.30266900 | 0.78219100  | 0.49268500  |
| Br | -3.22016300 | -0.16502800 | -1.59663300 |

(S)-TS2<sub>o</sub>-Br-P

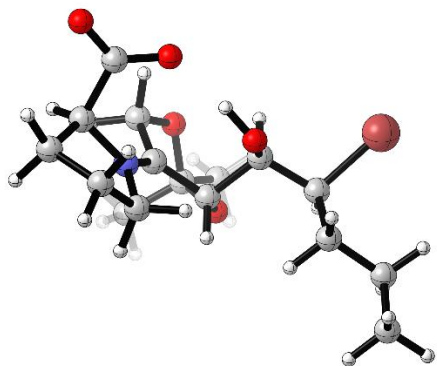

-----  
- Thermochemistry -  
-----

|                                              |                             |
|----------------------------------------------|-----------------------------|
| Zero-point correction=                       | 0.419397 (Hartree/Particle) |
| Thermal correction to Energy=                | 0.439742                    |
| Thermal correction to Enthalpy =             | 0.440607                    |
| Thermal correction to Gibbs Free Energy=     | 0.370977                    |
| Sum of electronic and zero-point Energies=   | -3627.245416                |
| Sum of electronic and thermal Energies=      | -3627.225071                |
| Sum of electronic and thermal Enthalpies=    | -3627.224206                |
| Sum of electronic and thermal Free Energies= | -3627.293836                |

Number of Imaginary Frequencies = 0

E (Single Point Energy) [IEFPCM<sub>(DCM)</sub>M06-2X/6-311++G(2d,2p)] = -3630.318050

|   |             |             |             |
|---|-------------|-------------|-------------|
| C | 0.06426900  | 0.69021800  | 0.78059800  |
| H | -0.08317400 | 0.17235700  | 1.73166700  |
| C | 1.50231200  | 0.62742200  | 0.36307500  |
| N | 2.25785700  | -0.35207000 | 0.70689900  |
| C | 3.55222300  | -0.63429000 | 0.05802100  |
| H | 4.11902400  | 0.29106100  | -0.06912600 |
| C | 1.90992400  | -1.42845700 | 1.68613900  |
| H | 0.91471700  | -1.81213500 | 1.46852300  |
| H | 1.93782100  | -0.97503900 | 2.68159500  |
| C | 3.02111000  | -2.45964800 | 1.49174100  |
| H | 2.72949000  | -3.17902100 | 0.72065900  |

|   |             |             |             |
|---|-------------|-------------|-------------|
| H | 3.21927100  | -3.00462300 | 2.41508600  |
| C | 4.21202300  | -1.62483600 | 1.01337900  |
| H | 4.67691300  | -1.09453300 | 1.84996600  |
| H | 4.97219100  | -2.20621500 | 0.49264100  |
| C | 1.97478500  | 1.67961400  | -0.60254800 |
| H | 2.90044400  | 2.14001100  | -0.22941000 |
| H | 2.18204400  | 1.21067000  | -1.57019900 |
| O | -0.45120200 | 1.99612000  | 0.91572000  |
| O | 0.96023000  | 2.63366800  | -0.81050200 |
| C | 0.32190600  | 3.07371200  | 0.37503800  |
| C | -0.66602000 | 4.14088900  | -0.04001300 |
| H | -1.28117200 | 4.42333600  | 0.81634500  |
| H | -0.13083700 | 5.02020700  | -0.40428500 |
| C | 1.31364700  | 3.56316900  | 1.42616500  |
| H | 0.75698000  | 4.01922400  | 2.24682500  |
| H | 1.98396100  | 4.30907900  | 0.99145800  |
| H | 1.91284200  | 2.75006800  | 1.84677900  |
| C | -0.71402900 | -0.05293300 | -0.37201400 |
| H | -0.57769000 | 0.56148000  | -1.27284400 |
| C | -2.19786200 | -0.08578400 | -0.01337300 |
| O | -0.25153100 | -1.35786400 | -0.54780700 |
| C | 3.30593400  | -1.25726300 | -1.37266200 |
| O | 2.12355500  | -1.26116400 | -1.80654800 |
| O | 4.33831000  | -1.65979700 | -1.92250600 |
| H | -1.30658300 | 3.74926800  | -0.83322400 |
| C | -2.54868400 | -1.11124600 | 1.05183100  |
| H | -2.27389200 | -2.10910400 | 0.69628700  |
| C | -4.01022000 | -1.07793700 | 1.49551200  |



|    |             |             |             |
|----|-------------|-------------|-------------|
| H  | -4.30302300 | -0.04098800 | 1.70304500  |
| H  | -4.64608900 | -1.42456500 | 0.67444900  |
| H  | -1.91900800 | -0.90171500 | 1.92894600  |
| C  | -4.24107900 | -1.94307600 | 2.73245000  |
| H  | -3.94877300 | -2.98074900 | 2.54047000  |
| H  | -3.65198800 | -1.58089200 | 3.58135600  |
| H  | -5.29368000 | -1.94055500 | 3.02746500  |
| H  | 0.59418200  | -1.35366100 | -1.06043300 |
| H  | -2.53898300 | 0.91462400  | 0.25351800  |
| Br | -3.18018000 | -0.51137500 | -1.66407900 |

(*R*)-TS<sub>2</sub><sub>T</sub>-Br-Pre

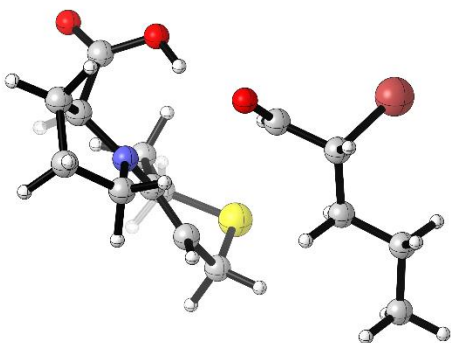

-----  
 - Thermochemistry -  
 -----

|                                              |                             |
|----------------------------------------------|-----------------------------|
| Zero-point correction=                       | 0.381780 (Hartree/Particle) |
| Thermal correction to Energy=                | 0.401726                    |
| Thermal correction to Enthalpy=              | 0.402591                    |
| Thermal correction to Gibbs Free Energy=     | 0.332897                    |
| Sum of electronic and zero-point Energies=   | -3835.735819                |
| Sum of electronic and thermal Energies=      | -3835.715872                |
| Sum of electronic and thermal Enthalpies=    | -3835.715007                |
| Sum of electronic and thermal Free Energies= | -3835.784701                |

Number of Imaginary Frequencies = 0

E (Single Point Energy) [IEFPCM(DCM)M06-2X/6-311++G(2d,2p)] = -3838.749773

|   |             |             |             |
|---|-------------|-------------|-------------|
| C | 0.61124100  | 1.84783300  | 0.82250100  |
| H | 0.46340800  | 1.65451400  | 1.88004200  |
| C | 1.58017000  | 1.17870000  | 0.15450100  |
| N | 2.35798800  | 0.20314100  | 0.77551200  |
| C | 3.57450300  | -0.34889300 | 0.19126600  |
| H | 4.31427300  | 0.41897100  | -0.07130400 |
| C | 2.35550500  | 0.07954800  | 2.23849900  |
| H | 1.52720800  | -0.56418000 | 2.56170000  |
| H | 2.22396800  | 1.06324500  | 2.70158700  |
| C | 3.72698100  | -0.50885100 | 2.57779400  |
| H | 3.69998900  | -1.15217400 | 3.45899100  |
| H | 4.44020500  | 0.29975600  | 2.76451600  |
| C | 4.11825700  | -1.26093700 | 1.30817600  |
| H | 5.19098300  | -1.42739300 | 1.20096500  |
| H | 3.60971700  | -2.23103800 | 1.27146300  |
| C | 1.84792400  | 1.36843200  | -1.32607400 |
| H | 2.92857600  | 1.45584000  | -1.49076500 |
| H | 1.52032500  | 0.47111000  | -1.86784200 |
| C | -0.74351700 | -1.13372300 | 0.07756900  |
| H | -0.53746400 | -0.52755400 | -0.82351200 |
| C | -2.15295600 | -1.07142800 | 0.60390600  |
| O | 0.11381400  | -1.82011100 | 0.59718200  |
| C | 3.34637900  | -1.19421400 | -1.05637300 |
| O | 2.22864500  | -1.91483000 | -1.09664500 |
| O | 4.16722000  | -1.26460200 | -1.94446500 |
| C | -2.58690500 | 0.35238500  | 0.90027200  |
| H | -1.88941300 | 0.73179300  | 1.66086600  |
| C | -4.01623400 | 0.48139000  | 1.41955200  |

|    |             |             |             |
|----|-------------|-------------|-------------|
| H  | -4.71740100 | 0.18574800  | 0.63239200  |
| H  | -4.16148400 | -0.21687400 | 2.25273600  |
| H  | -2.26812800 | -1.74057200 | 1.45745600  |
| H  | -2.44725300 | 0.96468100  | 0.00006300  |
| C  | -4.30922700 | 1.90950000  | 1.87306800  |
| H  | -4.17511100 | 2.61523600  | 1.04632900  |
| H  | -5.33625200 | 2.00742400  | 2.23359600  |
| H  | -3.63619600 | 2.20875100  | 2.68321700  |
| H  | 1.63474800  | -1.75489800 | -0.32431500 |
| C  | 1.18699300  | 2.59258500  | -1.94716600 |
| C  | -0.30108200 | 2.89488700  | 0.24050000  |
| H  | 1.66741800  | 3.51342800  | -1.60179800 |
| H  | 1.27415100  | 2.55304100  | -3.03428100 |
| H  | -1.28362800 | 2.84886200  | 0.71832800  |
| H  | 0.08282500  | 3.90806600  | 0.41100900  |
| S  | -0.58135600 | 2.69259400  | -1.54457500 |
| Br | -3.22386600 | -1.85474900 | -0.83866700 |

(R)-TS2<sub>T</sub>-Br

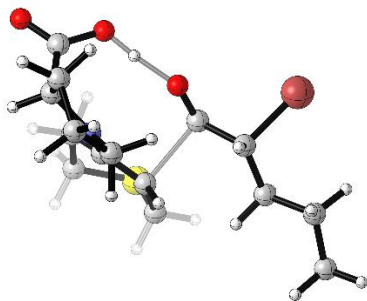

-----  
 - Thermochemistry -  
 -----

Zero-point correction=  
 Thermal correction to Energy=

0.381358 (Hartree/Particle)  
 0.399655

|                                              |              |
|----------------------------------------------|--------------|
| Thermal correction to Enthalpy=              | 0.400520     |
| Thermal correction to Gibbs Free Energy=     | 0.335789     |
| Sum of electronic and zero-point Energies=   | -3835.723469 |
| Sum of electronic and thermal Energies=      | -3835.705172 |
| Sum of electronic and thermal Enthalpies=    | -3835.704307 |
| Sum of electronic and thermal Free Energies= | -3835.769038 |

Number of Imaginary Frequencies = 1

E (Single Point Energy) [IEFPCM(DCM)M06-2X/6-311++G(2d,2p)] = -3838.734498

|   |             |             |             |
|---|-------------|-------------|-------------|
| C | 0.17093800  | 1.26588700  | 0.85145000  |
| H | -0.25600900 | 0.80089000  | 1.73689000  |
| C | 1.50186300  | 0.93797400  | 0.56416500  |
| N | 2.01369600  | -0.21077500 | 1.01583700  |
| C | 3.28996900  | -0.80012800 | 0.58401900  |
| H | 4.13209700  | -0.20119200 | 0.94713300  |
| C | 1.39547400  | -0.99238500 | 2.10673700  |
| H | 0.53209900  | -1.54007900 | 1.71824200  |
| H | 1.06881200  | -0.31550800 | 2.90000300  |
| C | 2.51450100  | -1.92903400 | 2.55448800  |
| H | 2.12619000  | -2.84374900 | 3.00449000  |
| H | 3.15629100  | -1.42646100 | 3.28442500  |
| C | 3.28418900  | -2.18301500 | 1.26073900  |
| H | 4.29887500  | -2.55294600 | 1.41011000  |
| H | 2.73858300  | -2.89470500 | 0.63129600  |
| C | 2.34951000  | 1.72203000  | -0.41391400 |
| H | 3.40067000  | 1.63653000  | -0.11762600 |
| H | 2.25628800  | 1.26318500  | -1.40597400 |
| C | -0.64463500 | -0.18085500 | -0.54076900 |
| H | -0.72315900 | 0.61796900  | -1.29352700 |
| C | -1.95538100 | -0.58359700 | 0.13259500  |
| O | 0.18395700  | -1.12613000 | -0.68833600 |

|    |             |             |             |
|----|-------------|-------------|-------------|
| C  | 3.48348600  | -0.97544400 | -0.92643400 |
| O  | 2.43315200  | -1.18137600 | -1.68112800 |
| O  | 4.61836800  | -0.98724900 | -1.36799300 |
| C  | -2.90803700 | 0.48782800  | 0.62590600  |
| H  | -2.39934400 | 1.02520200  | 1.43498600  |
| C  | -4.22265800 | -0.05059300 | 1.19472900  |
| H  | -4.84961500 | -0.42835200 | 0.38230100  |
| H  | -4.00727000 | -0.90595200 | 1.84771100  |
| H  | -1.74476000 | -1.33147200 | 0.89987200  |
| H  | -3.11145700 | 1.20721900  | -0.17704000 |
| C  | -4.97209600 | 1.02822100  | 1.97311800  |
| H  | -5.18041100 | 1.89384700  | 1.33557000  |
| H  | -5.92694900 | 0.65234100  | 2.34959200  |
| H  | -4.38496700 | 1.37610500  | 2.82914700  |
| H  | 1.48520600  | -1.11003800 | -1.23105700 |
| C  | 1.98711200  | 3.19725000  | -0.52289500 |
| C  | -0.39936100 | 2.63762800  | 0.55368400  |
| H  | 2.18684500  | 3.72707700  | 0.41339800  |
| H  | 2.57986200  | 3.66429500  | -1.31094900 |
| H  | -1.47977300 | 2.58842500  | 0.41625000  |
| H  | -0.21846700 | 3.31997300  | 1.39253300  |
| S  | 0.24117200  | 3.40526100  | -0.95985800 |
| Br | -2.87906600 | -1.61039800 | -1.29248400 |

(R)-TS2<sub>T</sub>-Br-P

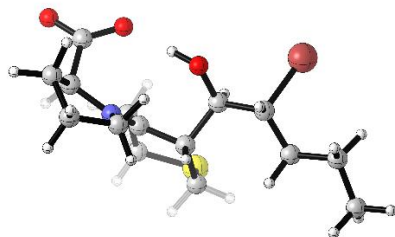

-----  
- Thermochemistry -  
-----

|                                              |                             |
|----------------------------------------------|-----------------------------|
| Zero-point correction=                       | 0.385550 (Hartree/Particle) |
| Thermal correction to Energy=                | 0.403892                    |
| Thermal correction to Enthalpy=              | 0.404757                    |
| Thermal correction to Gibbs Free Energy=     | 0.339331                    |
| Sum of electronic and zero-point Energies=   | -3835.746803                |
| Sum of electronic and thermal Energies=      | -3835.728461                |
| Sum of electronic and thermal Enthalpies=    | -3835.727596                |
| Sum of electronic and thermal Free Energies= | -3835.793023                |

Number of Imaginary Frequencies = 0

E (Single Point Energy) [IEFPCM(DCM)M06-2X/6-311++G(2d,2p)] = -3838.761015

|   |             |             |            |
|---|-------------|-------------|------------|
| C | 0.02539100  | 0.89194000  | 0.67828500 |
| H | -0.07438100 | 0.55998200  | 1.71527800 |
| C | 1.47782500  | 0.84062800  | 0.26472300 |
| N | 2.31169000  | 0.09104300  | 0.90432500 |
| C | 3.65650700  | -0.28751500 | 0.38448100 |
| H | 4.28811700  | 0.60387300  | 0.36672100 |
| C | 2.02802900  | -0.62598900 | 2.17882200 |
| H | 1.43698600  | -1.51323000 | 1.93248400 |
| H | 1.46700300  | 0.01956000  | 2.85215100 |
| C | 3.41912300  | -0.97438000 | 2.68983000 |
| H | 3.38752200  | -1.80166200 | 3.39997600 |
| H | 3.86376600  | -0.10541200 | 3.18442600 |
| C | 4.17389000  | -1.31289000 | 1.40663100 |

|   |             |             |             |
|---|-------------|-------------|-------------|
| H | 5.25738900  | -1.25167000 | 1.50527200  |
| H | 3.91441500  | -2.32338000 | 1.07420900  |
| C | 1.89816900  | 1.53668800  | -1.00337300 |
| H | 2.98403800  | 1.52365300  | -1.10582400 |
| H | 1.49555700  | 0.94590600  | -1.83590500 |
| C | -0.68206700 | -0.18904800 | -0.22890200 |
| H | -0.81350500 | 0.24998600  | -1.22734800 |
| C | -2.04571500 | -0.64982700 | 0.30582300  |
| O | 0.08496700  | -1.36585300 | -0.26818000 |
| C | 3.59648100  | -0.91823400 | -1.03915400 |
| O | 2.47632600  | -1.31587300 | -1.45740900 |
| O | 4.70185800  | -0.99905400 | -1.59662800 |
| C | -3.04121900 | 0.39670500  | 0.77002300  |
| H | -2.58898300 | 0.89404100  | 1.63823900  |
| C | -4.38475000 | -0.16931100 | 1.23252100  |
| H | -4.95245900 | -0.52299800 | 0.36752500  |
| H | -4.20298000 | -1.04581000 | 1.86746600  |
| H | -1.86677700 | -1.38726300 | 1.09259500  |
| H | -3.19800200 | 1.15331800  | -0.00963300 |
| C | -5.19468200 | 0.87641700  | 1.99539700  |
| H | -5.36969300 | 1.76137700  | 1.37460700  |
| H | -6.16829200 | 0.48007900  | 2.29490100  |
| H | -4.66939800 | 1.19968800  | 2.89995200  |
| H | 0.92562300  | -1.28705600 | -0.78556700 |
| C | 1.40859900  | 2.98215800  | -1.12440500 |
| C | -0.51546800 | 2.33395600  | 0.59964200  |
| H | 1.84875800  | 3.61448900  | -0.34762200 |
| H | 1.71648000  | 3.37498000  | -2.09448100 |

|    |             |             |             |
|----|-------------|-------------|-------------|
| H  | -1.56118700 | 2.38020000  | 0.88830400  |
| H  | 0.03785300  | 2.95542900  | 1.31113300  |
| S  | -0.39629300 | 3.09859200  | -1.03803700 |
| Br | -2.85785400 | -1.70384000 | -1.14756800 |

(S)-TS2<sub>T</sub>-Br-Pre

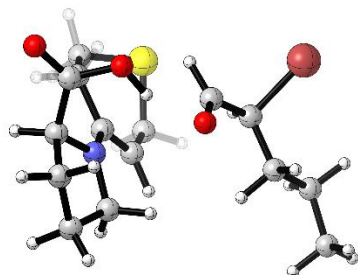

-----  
 - Thermochemistry -  
 -----

|                                              |                             |
|----------------------------------------------|-----------------------------|
| Zero-point correction=                       | 0.381375 (Hartree/Particle) |
| Thermal correction to Energy=                | 0.401323                    |
| Thermal correction to Enthalpy=              | 0.402188                    |
| Thermal correction to Gibbs Free Energy=     | 0.332851                    |
| Sum of electronic and zero-point Energies=   | -3835.739020                |
| Sum of electronic and thermal Energies=      | -3835.719072                |
| Sum of electronic and thermal Enthalpies=    | -3835.718207                |
| Sum of electronic and thermal Free Energies= | -3835.787543                |

Number of Imaginary Frequencies = 0

E (Single Point Energy) [IEFPCM(DCM)M06-2X/6-311++G(2d,2p)] = -3838.752143

|   |             |             |             |
|---|-------------|-------------|-------------|
| C | -0.46214300 | 0.46966600  | -1.84265900 |
| H | -0.15975600 | -0.48910300 | -2.25172800 |
| C | -1.52765100 | 0.52872500  | -1.00527700 |
| N | -2.19880500 | -0.61893300 | -0.60551700 |
| C | -3.44975000 | -0.61322200 | 0.14332400  |
| H | -4.24875300 | -0.05494300 | -0.36149000 |
| C | -1.98908600 | -1.88934400 | -1.31174600 |



|   |             |             |             |
|---|-------------|-------------|-------------|
| H | -1.11212400 | -2.40933400 | -0.90420200 |
| H | -1.81339500 | -1.70343600 | -2.37654700 |
| C | -3.28903100 | -2.66425800 | -1.08930800 |
| H | -3.13295400 | -3.74400400 | -1.06204000 |
| H | -3.99627600 | -2.43829100 | -1.89312700 |
| C | -3.81210400 | -2.10890200 | 0.23347500  |
| H | -4.88285300 | -2.25123300 | 0.38502900  |
| H | -3.27739300 | -2.56797000 | 1.07267300  |
| C | -2.01793800 | 1.81833900  | -0.37636600 |
| H | -3.10881100 | 1.87408300  | -0.47473200 |
| H | -1.80284400 | 1.79846300  | 0.70004700  |
| C | 0.67663700  | -0.20166200 | 0.89473400  |
| H | 0.27857200  | 0.77800900  | 1.21073400  |
| C | 2.00907400  | -0.16760000 | 0.19118000  |
| O | 0.09467300  | -1.23784500 | 1.15384700  |
| C | -3.34172900 | -0.04953900 | 1.55622400  |
| O | -2.21249100 | -0.28621900 | 2.22013800  |
| O | -4.26173300 | 0.53608800  | 2.08304200  |
| C | 2.43892500  | -1.50455600 | -0.36827600 |
| H | 2.50756700  | -2.23321900 | 0.44649900  |
| C | 3.73631600  | -1.46113500 | -1.17054500 |
| H | 3.67206300  | -0.66368600 | -1.92183800 |
| H | 4.57011300  | -1.20446400 | -0.50797100 |
| H | 1.61963900  | -1.84076400 | -1.02050900 |
| C | 4.00717800  | -2.79795100 | -1.85723700 |
| H | 4.94469200  | -2.77286800 | -2.41856600 |
| H | 4.07693000  | -3.60543800 | -1.12119100 |
| H | 3.20169100  | -3.04884100 | -2.55475200 |

|    |             |             |             |
|----|-------------|-------------|-------------|
| H  | -1.53026200 | -0.76191500 | 1.68770300  |
| H  | 2.02374200  | 0.64442100  | -0.53543000 |
| C  | -1.43035100 | 3.09137300  | -0.97378800 |
| C  | 0.35768400  | 1.64276700  | -2.31122300 |
| H  | 1.39805200  | 1.34066000  | -2.46606400 |
| H  | 0.00345200  | 2.03191700  | -3.27350000 |
| H  | -1.84158200 | 3.28108800  | -1.97014800 |
| H  | -1.67202000 | 3.94649900  | -0.34042800 |
| S  | 0.37950200  | 3.01611400  | -1.11862700 |
| Br | 3.23435200  | 0.44333300  | 1.60448400  |

(S)-TS2<sub>T</sub>-Br

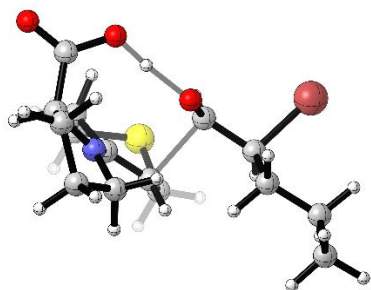

-----  
- Thermochemistry -  
-----

|                                              |                             |
|----------------------------------------------|-----------------------------|
| Zero-point correction=                       | 0.381194 (Hartree/Particle) |
| Thermal correction to Energy=                | 0.399570                    |
| Thermal correction to Enthalpy=              | 0.400435                    |
| Thermal correction to Gibbs Free Energy=     | 0.335558                    |
| Sum of electronic and zero-point Energies=   | -3835.731431                |
| Sum of electronic and thermal Energies=      | -3835.713055                |
| Sum of electronic and thermal Enthalpies=    | -3835.712190                |
| Sum of electronic and thermal Free Energies= | -3835.777067                |

Number of Imaginary Frequencies = 1

E (Single Point Energy) [IEFPCM<sub>(DCM)</sub>M06-2X/6-311++G(2d,2p)] = -3838.741723

|   |             |            |             |
|---|-------------|------------|-------------|
| C | -0.31215300 | 0.74983500 | -1.39252500 |
|---|-------------|------------|-------------|

|   |             |             |             |
|---|-------------|-------------|-------------|
| H | 0.15185900  | -0.05779800 | -1.95229800 |
| C | -1.57707800 | 0.49315200  | -0.85692600 |
| N | -1.98350200 | -0.76872600 | -0.67424300 |
| C | -3.14579100 | -1.17077600 | 0.13043700  |
| H | -4.07725300 | -0.84370100 | -0.34347400 |
| C | -1.36753500 | -1.92586900 | -1.35685900 |
| H | -0.43497700 | -2.19519100 | -0.85272400 |
| H | -1.15603300 | -1.66503500 | -2.39720100 |
| C | -2.42447800 | -3.01843500 | -1.22106300 |
| H | -1.98903800 | -4.01761700 | -1.26764900 |
| H | -3.16872500 | -2.92422700 | -2.01783600 |
| C | -3.05782300 | -2.70805500 | 0.13352300  |
| H | -4.03933100 | -3.15909800 | 0.28196000  |
| H | -2.39449400 | -3.03509100 | 0.94197900  |
| C | -2.44400100 | 1.58689000  | -0.27320200 |
| H | -3.49573100 | 1.29618800  | -0.36520500 |
| H | -2.22821300 | 1.67269300  | 0.80000200  |
| C | 0.65906800  | 0.30580400  | 0.48782400  |
| H | 0.42737300  | 1.31298700  | 0.86142500  |
| C | 2.06670900  | 0.14109100  | -0.06272700 |
| O | 0.12095600  | -0.70840400 | 1.01968800  |
| C | -3.16757000 | -0.65412800 | 1.57289000  |
| O | -2.02814000 | -0.46603600 | 2.19031200  |
| O | -4.24386100 | -0.49789800 | 2.12150600  |
| C | 2.38231300  | -1.25358100 | -0.56468500 |
| H | 2.15256000  | -1.97807800 | 0.22297900  |
| C | 3.81135100  | -1.43365900 | -1.07382900 |
| H | 4.07086400  | -0.59626700 | -1.73408300 |

|    |             |             |             |
|----|-------------|-------------|-------------|
| H  | 4.50672500  | -1.39293700 | -0.22952100 |
| H  | 1.68929900  | -1.45673800 | -1.39359100 |
| C  | 3.97598400  | -2.75566900 | -1.82003800 |
| H  | 5.00656200  | -2.89491400 | -2.15679600 |
| H  | 3.71668500  | -3.60092800 | -1.17405500 |
| H  | 3.32521200  | -2.79431100 | -2.69963100 |
| H  | -1.13123200 | -0.58359700 | 1.63930900  |
| H  | 2.33161000  | 0.91673100  | -0.77899200 |
| C  | -2.25561800 | 2.95077900  | -0.92796800 |
| C  | 0.11475400  | 2.12128700  | -1.86596100 |
| H  | 1.20328200  | 2.21665600  | -1.85080400 |
| H  | -0.19512500 | 2.28018300  | -2.90536800 |
| H  | -2.58358700 | 2.93555200  | -1.97176300 |
| H  | -2.84787800 | 3.69820800  | -0.39764800 |
| S  | -0.52530500 | 3.49084700  | -0.85930100 |
| Br | 3.23167200  | 0.54858700  | 1.48868900  |

(S)-TS<sub>2T</sub>-Br-P

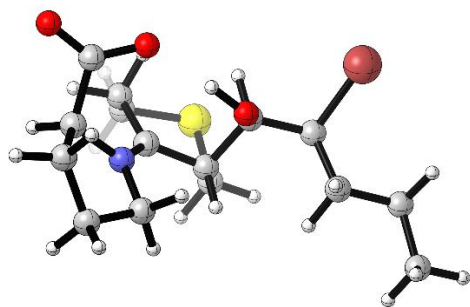

-----  
 - Thermochemistry -  
 -----

|                                          |                             |
|------------------------------------------|-----------------------------|
| Zero-point correction=                   | 0.385466 (Hartree/Particle) |
| Thermal correction to Energy=            | 0.403988                    |
| Thermal correction to Enthalpy=          | 0.404854                    |
| Thermal correction to Gibbs Free Energy= | 0.339318                    |

|                                              |              |
|----------------------------------------------|--------------|
| Sum of electronic and zero-point Energies=   | -3835.755023 |
| Sum of electronic and thermal Energies=      | -3835.736500 |
| Sum of electronic and thermal Enthalpies=    | -3835.735635 |
| Sum of electronic and thermal Free Energies= | -3835.801170 |

Number of Imaginary Frequencies = 0

E (Single Point Energy) [IEFPCM(DCM)M06-2X/6-311++G(2d,2p)] = -3838.768722

|   |             |             |             |
|---|-------------|-------------|-------------|
| C | -0.08690200 | 0.56808000  | -1.03361100 |
| H | 0.06075600  | -0.24281800 | -1.74847100 |
| C | -1.53000100 | 0.61962100  | -0.61620900 |
| N | -2.28847400 | -0.41070400 | -0.79140500 |
| C | -3.55278500 | -0.63133000 | -0.04089600 |
| H | -4.29017300 | 0.11432500  | -0.34689800 |
| C | -1.96333600 | -1.59873700 | -1.63023600 |
| H | -1.26889000 | -2.22981200 | -1.06827200 |
| H | -1.50091700 | -1.27443200 | -2.56148400 |
| C | -3.32456100 | -2.25581800 | -1.81647700 |
| H | -3.22609000 | -3.30736000 | -2.08903100 |
| H | -3.88426000 | -1.74082800 | -2.60316400 |
| C | -3.98684600 | -2.04746200 | -0.45612900 |
| H | -5.07297300 | -2.13251900 | -0.47939400 |
| H | -3.59918500 | -2.77490600 | 0.26469600  |
| C | -2.01728100 | 1.81037100  | 0.16384100  |
| H | -3.10504700 | 1.78860600  | 0.25235800  |
| H | -1.61545600 | 1.72516800  | 1.18035600  |
| C | 0.65827100  | 0.13589400  | 0.28495200  |
| H | 0.44916000  | 0.87761600  | 1.06519800  |
| C | 2.17112500  | 0.10748100  | 0.07284300  |
| O | 0.21738200  | -1.13740700 | 0.66832700  |
| C | -3.32228900 | -0.55575900 | 1.49937400  |

|    |             |             |             |
|----|-------------|-------------|-------------|
| O  | -2.13633400 | -0.66718000 | 1.91266100  |
| O  | -4.36444900 | -0.43933800 | 2.16169300  |
| C  | 2.64625700  | -0.92473900 | -0.93501600 |
| H  | 2.29236200  | -1.91510800 | -0.62924700 |
| C  | 4.15575600  | -0.93291400 | -1.17210400 |
| H  | 4.50662500  | 0.09964500  | -1.29730100 |
| H  | 4.66243500  | -1.32880900 | -0.28659700 |
| H  | 2.15692700  | -0.69097700 | -1.89227900 |
| C  | 4.52807800  | -1.76295400 | -2.39857800 |
| H  | 5.61115700  | -1.79046300 | -2.54370400 |
| H  | 4.17771100  | -2.79469400 | -2.28985700 |
| H  | 4.07626900  | -1.34949100 | -3.30613700 |
| H  | -0.62782000 | -1.04497400 | 1.17193700  |
| H  | 2.54375700  | 1.10664700  | -0.15848300 |
| C  | -1.59625900 | 3.15058300  | -0.45147000 |
| C  | 0.40840400  | 1.86683000  | -1.68026900 |
| H  | 1.46802300  | 1.78479800  | -1.93013100 |
| H  | -0.12890300 | 2.03665000  | -2.61845600 |
| H  | -2.05899600 | 3.29298900  | -1.43269300 |
| H  | -1.93540800 | 3.95761300  | 0.19959600  |
| S  | 0.20380800  | 3.32302600  | -0.61594100 |
| Br | 2.97739300  | -0.28010900 | 1.82459400  |

**Supplementary Table 10.** Energies for enamine addition to 2-chloropentanal. Reported energies for structures optimized at the IEFPCM<sub>(DCM)</sub>M06-2X/6-311++G(2d,2p)//IEFPCM<sub>(DCM)</sub>M06-2X/6-31+G(d,p) level of theory represent the sum of the thermal correction to Gibbs Free Energy computed at the IEFPCM<sub>(DCM)</sub>M06-2X/6-31+G(d,p) level of theory and single point energies computed at the IEFPCM<sub>(DCM)</sub>M06-2X/6-311++G(2d,2p). All energies are reported in Hartrees.

| Structure                                 | Single Point Energies, E<br>IEFPCM <sub>(DCM)</sub> M06-2X/6-311++G(2d,2p) | Thermal Corrections to Gibbs Free Energies,<br>IEFPCM <sub>(DCM)</sub> M06-2X/6-31+G(d,p) | Gibbs Free Energies (G),<br>IEFPCM <sub>(DCM)</sub> M06-2X/6-31+G(d,p) | Gibbs Free Energies (G),<br>IEFPCM <sub>(DCM)</sub> M06-2X/6-311++G(2d,2p)//<br>IEFPCM <sub>(DCM)</sub> M06-2X/6-31+G(d,p) |
|-------------------------------------------|----------------------------------------------------------------------------|-------------------------------------------------------------------------------------------|------------------------------------------------------------------------|----------------------------------------------------------------------------------------------------------------------------|
| 2-Chloropentanal                          | -731.33393130                                                              | 0.102879                                                                                  | -731.121809                                                            | -731.2310523                                                                                                               |
| Enamine of Cyclohexanone (G)              | -634.55147535                                                              | 0.238392                                                                                  | -634.142903                                                            | -634.3130834                                                                                                               |
| Enamine of Dioxane (O)                    | -784.98483791                                                              | 0.244077                                                                                  | -784.522619                                                            | -784.7407609                                                                                                               |
| Enamine of Tetrahydro-4H-thiopyranone (T) | -993.43210840                                                              | 0.210205                                                                                  | -993.028735                                                            | -993.2219034                                                                                                               |
| Enamine of Tetrahydro-4H-pyranone (P)     | -670.45469021                                                              | 0.214793                                                                                  | -670.055312                                                            | -670.2398972                                                                                                               |
| ( <i>R</i> )-TS3 <sub>P</sub> -Cl-Pre     | -1401.805997                                                               | 0.337891                                                                                  | -1401.17504                                                            | -1401.468106                                                                                                               |
| ( <i>R</i> )-TS3 <sub>P</sub> -Cl         | -1401.792111                                                               | 0.341323                                                                                  | -1401.159118                                                           | -1401.450788                                                                                                               |
| ( <i>R</i> )-TS3 <sub>P</sub> -Cl-P       | -1401.825385                                                               | 0.345243                                                                                  | -1401.188706                                                           | -1401.480142                                                                                                               |
| ( <i>S</i> )-TS3 <sub>P</sub> -Cl-Pre     | -1401.805033                                                               | 0.336807                                                                                  | -1401.175179                                                           | -1401.468226                                                                                                               |
| ( <i>S</i> )-TS3 <sub>P</sub> -Cl         | -1401.791658                                                               | 0.340366                                                                                  | -1401.159908                                                           | -1401.451292                                                                                                               |
| ( <i>S</i> )-TS3 <sub>P</sub> -Cl-P       | -1401.82164                                                                | 0.344016                                                                                  | -1401.186409                                                           | -1401.477624                                                                                                               |
| ( <i>R</i> )-TS3 <sub>G</sub> -Cl-Pre     | -1365.903524                                                               | 0.361325                                                                                  | -1365.263362                                                           | -1365.542199                                                                                                               |
| ( <i>R</i> )-TS3 <sub>G</sub> -Cl         | -1365.888196                                                               | 0.364421                                                                                  | -1365.246524                                                           | -1365.523775                                                                                                               |
| ( <i>R</i> )-TS3 <sub>G</sub> -Cl-P       | -1365.918739                                                               | 0.36881                                                                                   | -1365.27305                                                            | -1365.549929                                                                                                               |
| ( <i>S</i> )-TS3 <sub>G</sub> -Cl-Pre     | -1365.901816                                                               | 0.360176                                                                                  | -1365.262948                                                           | -1365.54164                                                                                                                |
| ( <i>S</i> )-TS3 <sub>G</sub> -Cl         | -1365.88909                                                                | 0.364491                                                                                  | -1365.247432                                                           | -1365.524599                                                                                                               |
| ( <i>S</i> )-TS3 <sub>G</sub> -Cl-P       | -1365.9162                                                                 | 0.367159                                                                                  | -1365.27225                                                            | -1365.549041                                                                                                               |
| ( <i>R</i> )-TS3 <sub>O</sub> -Cl-Pre     | -1516.336463                                                               | 0.365498                                                                                  | -1515.644377                                                           | -1515.970965                                                                                                               |
| ( <i>R</i> )-TS3 <sub>O</sub> -Cl         | -1516.319628                                                               | 0.36887                                                                                   | -1515.625316                                                           | -1515.95075                                                                                                                |

|                              |              |          |              |              |
|------------------------------|--------------|----------|--------------|--------------|
| (R)-TS3 <sub>O</sub> -Cl-P   | -1516.34889  | 0.373824 | -1515.649894 | -1515.975066 |
| (S)-TS3 <sub>O</sub> -Cl-Pre | -1516.33738  | 0.366707 | -1515.643925 | -1515.970673 |
| (S)-TS3 <sub>O</sub> -Cl     | -1516.318913 | 0.369175 | -1515.624654 | -1515.949738 |
| (S)-TS3 <sub>O</sub> -Cl-P   | -1516.346594 | 0.373427 | -1515.648241 | -1515.973167 |
| (R)-TS3 <sub>T</sub> -Cl-Pre | -1724.78465  | 0.335088 | -1724.147822 | -1724.449562 |
| (R)-TS3 <sub>T</sub> -Cl     | -1724.769951 | 0.336882 | -1724.132824 | -1724.433069 |
| (R)-TS3 <sub>T</sub> -Cl-P   | -1724.802661 | 0.341118 | -1724.161485 | -1724.461543 |
| (S)-TS3 <sub>T</sub> -Cl-Pre | -1724.781967 | 0.333162 | -1724.146451 | -1724.448805 |
| (S)-TS3 <sub>T</sub> -Cl     | -1724.769924 | 0.336822 | -1724.132677 | -1724.433102 |
| (S)-TS3 <sub>T</sub> -Cl-P   | -1724.799615 | 0.341308 | -1724.158295 | -1724.458307 |

(R)-TS3<sub>p</sub>-Cl-Pre

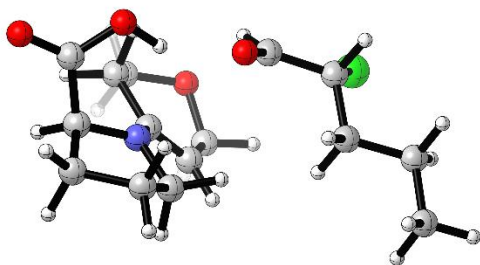

-----  
- Thermochemistry -  
-----

|                                              |                             |
|----------------------------------------------|-----------------------------|
| Zero-point correction=                       | 0.385367 (Hartree/Particle) |
| Thermal correction to Energy=                | 0.404688                    |
| Thermal correction to Enthalpy=              | 0.405553                    |
| Thermal correction to Gibbs Free Energy=     | 0.337891                    |
| Sum of electronic and zero-point Energies=   | -1401.127565                |
| Sum of electronic and thermal Energies=      | -1401.108243                |
| Sum of electronic and thermal Enthalpies=    | -1401.107378                |
| Sum of electronic and thermal Free Energies= | -1401.175040                |

Number of Imaginary Frequencies = 0

E (Single Point Energy) [IEFPCM<sub>(DCM)</sub>M06-2X/6-311++G(2d,2p)] = -1401.805997



|   |             |             |             |
|---|-------------|-------------|-------------|
| C | 0.11697200  | 1.00008100  | -1.53762800 |
| H | 0.55220700  | 0.17987700  | -2.09967300 |
| C | -1.01985300 | 0.83922000  | -0.83013700 |
| N | -1.62363600 | -0.39870500 | -0.63107600 |
| C | -3.06370200 | -0.53475000 | -0.42048200 |
| H | -3.64646800 | 0.21827700  | -0.96040700 |
| C | -1.06121200 | -1.59546700 | -1.25501200 |
| H | -1.01408400 | -1.48522100 | -2.35011800 |
| H | -0.04670400 | -1.76526400 | -0.88092600 |
| C | -2.04982100 | -2.68513900 | -0.85729900 |
| H | -1.99910700 | -3.55752700 | -1.51090700 |
| H | -1.85557300 | -3.01000200 | 0.17067100  |
| C | -3.39002400 | -1.95084100 | -0.95057800 |
| H | -3.69942500 | -1.86937500 | -1.99621900 |
| H | -4.19992700 | -2.42173500 | -0.39064400 |
| C | -1.62299100 | 2.00770900  | -0.08460600 |
| H | -2.70490200 | 2.06408800  | -0.24848200 |
| H | -1.47415600 | 1.86789000  | 0.99543700  |
| C | 1.10069200  | 0.23014500  | 1.38805000  |
| H | 0.84676800  | 1.30354600  | 1.34076400  |
| C | 2.55788600  | -0.15380800 | 1.18763000  |
| O | 0.27144700  | -0.62183100 | 1.62793100  |
| C | -3.46654500 | -0.41700400 | 1.05197800  |
| O | -2.49963700 | -0.50961800 | 1.95874700  |
| O | -4.62537500 | -0.28372300 | 1.38167100  |
| H | -1.61150600 | -0.56539600 | 1.54054300  |
| C | 2.73354100  | -1.23905900 | 0.13027000  |

|    |             |             |             |
|----|-------------|-------------|-------------|
| H  | 2.42424400  | -0.83921800 | -0.84376100 |
| C  | 4.15030400  | -1.80149200 | 0.04965600  |
| H  | 2.03152900  | -2.03972800 | 0.39524400  |
| C  | 4.24746100  | -2.92806300 | -0.97706300 |
| H  | 5.26459700  | -3.32412700 | -1.03250300 |
| H  | 3.57709900  | -3.75369700 | -0.71751800 |
| H  | 3.97041400  | -2.57098000 | -1.97421200 |
| H  | 4.44604400  | -2.17104400 | 1.03923800  |
| H  | 4.84900500  | -0.99982600 | -0.21219300 |
| H  | 2.93614700  | -0.50389800 | 2.15418000  |
| C  | -0.98615900 | 3.31713300  | -0.53608300 |
| C  | 0.84047100  | 2.32149200  | -1.59127500 |
| H  | -1.35007500 | 3.59051300  | -1.53797400 |
| H  | -1.22899300 | 4.12642500  | 0.15467600  |
| H  | 1.91562900  | 2.17572600  | -1.45336400 |
| H  | 0.69267900  | 2.81154100  | -2.56828700 |
| O  | 0.42553200  | 3.20113700  | -0.55954400 |
| Cl | 3.50542100  | 1.32831900  | 0.79582400  |

(*R*)-**TS3**<sub>p</sub>-Cl

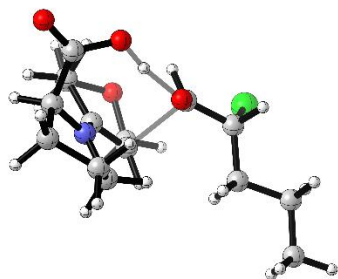

-----  
 - Thermochemistry -  
 -----

Zero-point correction=

0.385433 (Hartree/Particle)

|                                              |              |
|----------------------------------------------|--------------|
| Thermal correction to Energy=                | 0.403070     |
| Thermal correction to Enthalpy=              | 0.403935     |
| Thermal correction to Gibbs Free Energy=     | 0.341323     |
| Sum of electronic and zero-point Energies=   | -1401.115009 |
| Sum of electronic and thermal Energies=      | -1401.097372 |
| Sum of electronic and thermal Enthalpies=    | -1401.096507 |
| Sum of electronic and thermal Free Energies= | -1401.159118 |

Number of Imaginary Frequencies = 1

E (Single Point Energy) [IEFPCM<sub>(DCM)</sub>M06-2X/6-311++G(2d,2p)] = -1401.792111

|   |             |             |             |
|---|-------------|-------------|-------------|
| C | -0.39198300 | 0.70901100  | 1.11490500  |
| H | -0.80661900 | -0.16339600 | 1.60844900  |
| C | 0.97656200  | 0.72845400  | 0.85844900  |
| N | 1.69718300  | -0.39663400 | 0.79751800  |
| C | 3.09820600  | -0.46514100 | 0.37324000  |
| H | 3.70559900  | 0.28500400  | 0.88415600  |
| C | 1.19465800  | -1.70723000 | 1.25582900  |
| H | 1.16083000  | -1.71319100 | 2.35299300  |
| H | 0.19678800  | -1.88907800 | 0.86022000  |
| C | 2.22800400  | -2.68590100 | 0.70908700  |
| H | 2.26308900  | -3.61219500 | 1.28423100  |
| H | 1.98712900  | -2.93104700 | -0.33074100 |
| C | 3.52973900  | -1.88625200 | 0.78528500  |
| H | 3.89842600  | -1.85956600 | 1.81458100  |
| H | 4.32580400  | -2.26656100 | 0.14378300  |
| C | 1.61638700  | 2.02004700  | 0.41133200  |
| H | 2.64608800  | 2.09234200  | 0.77120000  |
| H | 1.65882400  | 2.02487000  | -0.68743400 |
| C | -0.79471900 | 0.17720300  | -0.97576100 |
| H | -0.55884400 | 1.20579500  | -1.28541500 |
| C | -2.28714500 | -0.17370400 | -0.99105700 |

|    |             |             |             |
|----|-------------|-------------|-------------|
| O  | -0.02461500 | -0.77814600 | -1.27985500 |
| C  | 3.32183500  | -0.24110300 | -1.13233000 |
| O  | 2.30447300  | -0.31919000 | -1.95441000 |
| O  | 4.45552100  | -0.02320500 | -1.52023300 |
| H  | 1.34588500  | -0.51064600 | -1.57017300 |
| C  | -2.79552500 | -1.08927200 | 0.11115800  |
| H  | -2.88175400 | -0.52735700 | 1.04839000  |
| C  | -4.13093100 | -1.75475400 | -0.21609400 |
| H  | -2.02778800 | -1.86198100 | 0.25529700  |
| C  | -4.59402700 | -2.67759600 | 0.90901100  |
| H  | -5.54825100 | -3.15112500 | 0.66433800  |
| H  | -3.86128900 | -3.47035300 | 1.09172600  |
| H  | -4.72483700 | -2.11960200 | 1.84187800  |
| H  | -4.02918400 | -2.32422400 | -1.14788100 |
| H  | -4.88676700 | -0.98226500 | -0.39686000 |
| H  | -2.42372300 | -0.66945900 | -1.95786800 |
| C  | 0.82486700  | 3.23083700  | 0.90343500  |
| C  | -1.09574700 | 2.01771100  | 1.40527100  |
| H  | 0.98188800  | 3.36951900  | 1.98341300  |
| H  | 1.15415600  | 4.13342200  | 0.38672400  |
| H  | -2.15576900 | 1.95784100  | 1.15711300  |
| H  | -1.01617400 | 2.26373000  | 2.47711900  |
| O  | -0.55685100 | 3.08067800  | 0.64092900  |
| Cl | -3.28900500 | 1.32947100  | -1.12081700 |

(R)-TS3p-Cl-P

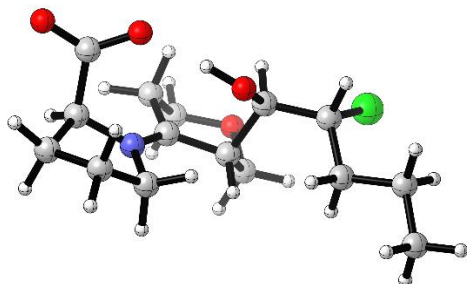

-----  
- Thermochemistry -  
-----

|                                              |                             |
|----------------------------------------------|-----------------------------|
| Zero-point correction=                       | 0.389582 (Hartree/Particle) |
| Thermal correction to Energy=                | 0.407307                    |
| Thermal correction to Enthalpy=              | 0.408172                    |
| Thermal correction to Gibbs Free Energy=     | 0.345243                    |
| Sum of electronic and zero-point Energies=   | -1401.144367                |
| Sum of electronic and thermal Energies=      | -1401.126642                |
| Sum of electronic and thermal Enthalpies=    | -1401.125777                |
| Sum of electronic and thermal Free Energies= | -1401.188706                |

Number of Imaginary Frequencies = 0

E (Single Point Energy) [IEFPCM(DCM)M06-2X/6-311++G(2d,2p)] = -1401.825385

|   |             |             |             |
|---|-------------|-------------|-------------|
| C | 0.44187200  | 0.49188700  | -0.71616800 |
| H | 0.67756600  | -0.40106700 | -1.29874100 |
| C | -1.04576400 | 0.67395200  | -0.61359100 |
| N | -1.85767500 | -0.31518700 | -0.76756900 |
| C | -3.28386100 | -0.27426800 | -0.37519700 |
| H | -3.77432200 | 0.59768300  | -0.80844300 |
| C | -1.46141100 | -1.70420800 | -1.15167500 |
| H | -1.30064200 | -1.70809700 | -2.23392600 |
| H | -0.54763000 | -1.98114400 | -0.63034700 |
| C | -2.66720400 | -2.54922000 | -0.74939900 |
| H | -2.74660800 | -3.44548400 | -1.36559800 |

|   |             |             |             |
|---|-------------|-------------|-------------|
| H | -2.57340900 | -2.85406000 | 0.29740100  |
| C | -3.84377400 | -1.58776500 | -0.91991900 |
| H | -4.10236300 | -1.47849900 | -1.97776000 |
| H | -4.73616400 | -1.88081400 | -0.36706000 |
| C | -1.51039500 | 2.03582400  | -0.19376100 |
| H | -2.57843000 | 2.17810600  | -0.35706000 |
| H | -1.33594200 | 2.11018700  | 0.88697800  |
| C | 0.92860100  | 0.26911300  | 0.75652500  |
| H | 0.75908600  | 1.19043600  | 1.32817700  |
| C | 2.41524900  | -0.10418500 | 0.88945000  |
| O | 0.23541600  | -0.81731700 | 1.32654300  |
| C | -3.39898900 | -0.18411700 | 1.19064400  |
| O | -2.32871700 | -0.13731500 | 1.85442500  |
| O | -4.56724500 | -0.16392200 | 1.60410800  |
| H | -0.69329100 | -0.56298400 | 1.55518200  |
| C | 2.91306400  | -1.13566900 | -0.11031000 |
| H | 2.96063000  | -0.69590600 | -1.11516400 |
| C | 4.26891000  | -1.74082300 | 0.24874300  |
| H | 2.15696200  | -1.93340000 | -0.13724900 |
| C | 4.69786900  | -2.80869800 | -0.75512900 |
| H | 5.66866300  | -3.23446900 | -0.48874700 |
| H | 3.97031700  | -3.62598300 | -0.79282800 |
| H | 4.78094400  | -2.38640700 | -1.76193400 |
| H | 4.21070400  | -2.17573900 | 1.25395600  |
| H | 5.02227400  | -0.94666700 | 0.28999500  |
| H | 2.52601700  | -0.48798700 | 1.90579100  |
| C | -0.71420200 | 3.13266500  | -0.91578500 |
| C | 1.05748300  | 1.71144300  | -1.42334700 |

|    |             |            |             |
|----|-------------|------------|-------------|
| H  | -0.99632000 | 3.17169200 | -1.97774900 |
| H  | -0.93158700 | 4.09946300 | -0.46127200 |
| H  | 2.14525400  | 1.66103700 | -1.39871800 |
| H  | 0.73492900  | 1.71690500 | -2.47496400 |
| O  | 0.67706400  | 2.91724800 | -0.79687100 |
| Cl | 3.45825000  | 1.38437500 | 0.86064300  |

(S)-TS3<sub>P</sub>-Cl-Pre

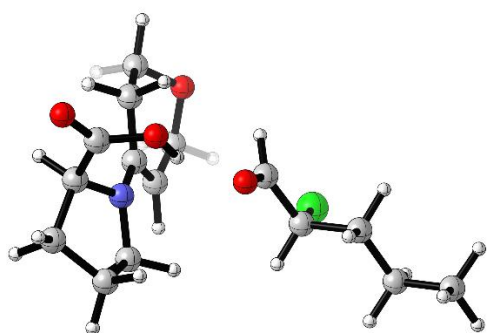

-----  
- Thermochemistry -  
-----

|                                              |                             |
|----------------------------------------------|-----------------------------|
| Zero-point correction=                       | 0.385343 (Hartree/Particle) |
| Thermal correction to Energy=                | 0.404761                    |
| Thermal correction to Enthalpy=              | 0.405626                    |
| Thermal correction to Gibbs Free Energy=     | 0.336807                    |
| Sum of electronic and zero-point Energies=   | -1401.126642                |
| Sum of electronic and thermal Energies=      | -1401.107224                |
| Sum of electronic and thermal Enthalpies=    | -1401.106359                |
| Sum of electronic and thermal Free Energies= | -1401.175179                |

Number of Imaginary Frequencies = 0

E (Single Point Energy) [IEFPCM<sub>(DCM)</sub>M06-2X/6-311++G(2d,2p)] = -1401.805033

|   |            |             |            |
|---|------------|-------------|------------|
| C | 0.52086100 | 1.70660200  | 1.15997200 |
| H | 0.10004200 | 1.28543700  | 2.06805200 |
| C | 1.42673200 | 1.03145600  | 0.42319600 |
| N | 1.78312400 | -0.29134000 | 0.67330500 |

|   |             |             |             |
|---|-------------|-------------|-------------|
| C | 3.11346000  | -0.80435800 | 0.34508000  |
| H | 3.89528600  | -0.04330900 | 0.43285400  |
| C | 1.21643200  | -0.99259200 | 1.82446200  |
| H | 1.43159200  | -0.45333800 | 2.76052900  |
| H | 0.13027400  | -1.07088700 | 1.71409500  |
| C | 1.93068200  | -2.33829100 | 1.79164400  |
| H | 1.90358500  | -2.85184100 | 2.75411200  |
| H | 1.47139200  | -2.98759200 | 1.03840500  |
| C | 3.34734100  | -1.93673800 | 1.37273900  |
| H | 3.88745300  | -1.52500500 | 2.22967200  |
| H | 3.94057800  | -2.75237100 | 0.95564300  |
| C | 1.99364300  | 1.64984400  | -0.83450800 |
| H | 3.07579400  | 1.49281200  | -0.90298300 |
| H | 1.54372000  | 1.15845800  | -1.70864600 |
| C | -1.26593100 | 0.00474100  | -0.74890100 |
| H | -1.07108900 | 0.99484300  | -1.19730400 |
| C | -2.52363100 | -0.16326700 | 0.08578600  |
| O | -0.54481600 | -0.94963200 | -0.94917000 |
| C | 3.20863700  | -1.35537800 | -1.08012800 |
| O | 2.06957100  | -1.56664900 | -1.73073200 |
| O | 4.27817100  | -1.62294900 | -1.58383200 |
| H | 1.29570100  | -1.25844500 | -1.21025700 |
| C | -3.53834300 | -1.03751100 | -0.65339500 |
| H | -3.00999400 | -1.96171800 | -0.91820200 |
| C | -4.77913500 | -1.37055800 | 0.17152600  |
| H | -3.82420400 | -0.54388900 | -1.59063800 |
| C | -5.72022700 | -2.30529200 | -0.58590600 |
| H | -6.60714100 | -2.53673400 | 0.00942000  |



|    |             |             |             |
|----|-------------|-------------|-------------|
| H  | -6.05338000 | -1.84684400 | -1.52245800 |
| H  | -5.22244300 | -3.24858200 | -0.83200900 |
| H  | -5.30554100 | -0.44644700 | 0.43194600  |
| H  | -4.46773400 | -1.83676600 | 1.11448300  |
| H  | -2.25265300 | -0.62022900 | 1.04167000  |
| Cl | -3.20460100 | 1.45907900  | 0.47088500  |
| C  | 1.70782000  | 3.14601300  | -0.87400000 |
| C  | 0.06011100  | 3.09051900  | 0.77653200  |
| H  | 2.34716200  | 3.67418600  | -0.15044200 |
| H  | 1.89928000  | 3.55244400  | -1.86867200 |
| H  | -1.02331500 | 3.17822300  | 0.88732300  |
| H  | 0.52560300  | 3.84885500  | 1.42840600  |
| O  | 0.34653200  | 3.39956000  | -0.57723700 |

(S)-TS3<sub>P</sub>-Cl

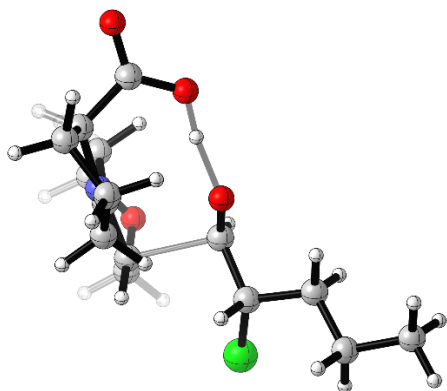

-----  
 - Thermochemistry -  
 -----

|                                            |                             |
|--------------------------------------------|-----------------------------|
| Zero-point correction=                     | 0.385246 (Hartree/Particle) |
| Thermal correction to Energy=              | 0.403024                    |
| Thermal correction to Enthalpy=            | 0.403889                    |
| Thermal correction to Gibbs Free Energy=   | 0.340366                    |
| Sum of electronic and zero-point Energies= | -1401.115028                |
| Sum of electronic and thermal Energies=    | -1401.097250                |
| Sum of electronic and thermal Enthalpies=  | -1401.096385                |

Sum of electronic and thermal Free Energies=

-1401.159908

Number of Imaginary Frequencies = 1

E (Single Point Energy) [IEFPCM(DCM)M06-2X/6-311++G(2d,2p)] = -1401.791658

|   |             |             |             |
|---|-------------|-------------|-------------|
| C | 0.08379200  | 1.49870100  | 0.82749200  |
| H | -0.36762800 | 1.12990200  | 1.74521600  |
| C | 1.33215400  | 0.99929600  | 0.45191800  |
| N | 1.74772300  | -0.21384500 | 0.82498600  |
| C | 2.99471500  | -0.84422200 | 0.37784500  |
| H | 3.84246500  | -0.16495800 | 0.49155000  |
| C | 1.05900400  | -1.02612800 | 1.84490300  |
| H | 1.24778100  | -0.59442200 | 2.83621500  |
| H | -0.01201400 | -1.03788000 | 1.65344100  |
| C | 1.70014400  | -2.39946400 | 1.68614000  |
| H | 1.62289900  | -2.99909400 | 2.59412600  |
| H | 1.21109800  | -2.93832000 | 0.86786600  |
| C | 3.14432400  | -2.05667900 | 1.31800800  |
| H | 3.69847200  | -1.74747300 | 2.20867200  |
| H | 3.68914000  | -2.87076800 | 0.83856600  |
| C | 2.14219000  | 1.73036200  | -0.59079800 |
| H | 3.21303700  | 1.60914100  | -0.40715900 |
| H | 1.92689700  | 1.28644100  | -1.57240700 |
| C | -1.00032200 | 0.21838300  | -0.54006600 |
| H | -1.02415100 | 1.05330500  | -1.25763600 |
| C | -2.31242800 | -0.07968900 | 0.19560900  |
| O | -0.32558000 | -0.82441900 | -0.77707700 |
| C | 3.00812400  | -1.28675400 | -1.09644600 |
| O | 1.88771800  | -1.33002500 | -1.77605200 |
| O | 4.07445300  | -1.60834000 | -1.58724700 |

|    |             |             |             |
|----|-------------|-------------|-------------|
| H  | 1.01131900  | -1.04486200 | -1.30205400 |
| C  | -3.18892200 | -0.97523300 | -0.68231900 |
| H  | -2.56793200 | -1.83542600 | -0.95534600 |
| C  | -4.46737000 | -1.46140000 | -0.00270500 |
| H  | -3.42992500 | -0.43983000 | -1.61018000 |
| C  | -5.23391100 | -2.44163900 | -0.88908500 |
| H  | -6.15060200 | -2.78215900 | -0.40038100 |
| H  | -5.51293500 | -1.97150600 | -1.83766000 |
| H  | -4.62535600 | -3.32229900 | -1.11804800 |
| H  | -5.10701100 | -0.60731300 | 0.24160600  |
| H  | -4.20639800 | -1.94480100 | 0.94744900  |
| H  | -2.09777100 | -0.58093400 | 1.14257200  |
| Cl | -3.22570000 | 1.41794800  | 0.63424700  |
| C  | 1.79138300  | 3.21217000  | -0.61872800 |
| C  | -0.24113300 | 2.94348800  | 0.48926200  |
| H  | 2.17496900  | 3.71452800  | 0.28183000  |
| H  | 2.22688700  | 3.69130800  | -1.49683100 |
| H  | -1.30970000 | 3.07388800  | 0.32650800  |
| H  | 0.05591700  | 3.60129300  | 1.32250000  |
| O  | 0.39127500  | 3.37864600  | -0.70008400 |

(S)-TS3<sub>P</sub>-Cl-P

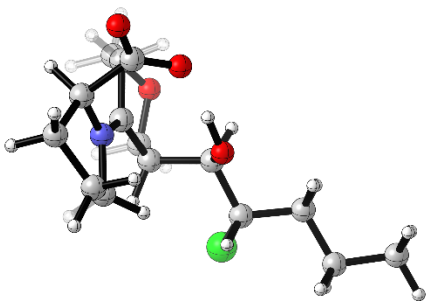

-----  
- Thermochemistry -  
-----

|                                              |                             |
|----------------------------------------------|-----------------------------|
| Zero-point correction=                       | 0.389100 (Hartree/Particle) |
| Thermal correction to Energy=                | 0.406954                    |
| Thermal correction to Enthalpy=              | 0.407819                    |
| Thermal correction to Gibbs Free Energy=     | 0.344016                    |
| Sum of electronic and zero-point Energies=   | -1401.141324                |
| Sum of electronic and thermal Energies=      | -1401.123470                |
| Sum of electronic and thermal Enthalpies=    | -1401.122605                |
| Sum of electronic and thermal Free Energies= | -1401.186409                |

Number of Imaginary Frequencies = 0

E (Single Point Energy) [IEFPCM<sub>(DCM)</sub>M06-2X/6-311++G(2d,2p)] = -1401.821640

|   |             |             |            |
|---|-------------|-------------|------------|
| C | -0.18747100 | 1.14499500  | 0.58691700 |
| H | -0.33681100 | 0.85126500  | 1.63022400 |
| C | 1.25038300  | 0.93151800  | 0.19413800 |
| N | 1.95112500  | 0.00002500  | 0.74545300 |
| C | 3.28182700  | -0.43683600 | 0.26262700 |
| H | 3.94424000  | 0.42397700  | 0.16364200 |
| C | 1.46358000  | -0.90571400 | 1.82752100 |
| H | 1.51687600  | -0.35188200 | 2.76988400 |
| H | 0.43799800  | -1.20199200 | 1.61785000 |
| C | 2.44915300  | -2.06973800 | 1.79265900 |
| H | 2.52125000  | -2.55876600 | 2.76471200 |
| H | 2.12325300  | -2.80843400 | 1.05380300 |

|    |             |             |             |
|----|-------------|-------------|-------------|
| C  | 3.75254400  | -1.40777300 | 1.34550900  |
| H  | 4.20793500  | -0.85761900 | 2.17481000  |
| H  | 4.48505300  | -2.10458500 | 0.93879300  |
| C  | 1.77986400  | 1.74022300  | -0.95160200 |
| H  | 2.86851200  | 1.72111000  | -1.00185000 |
| H  | 1.40716700  | 1.25667700  | -1.86435200 |
| C  | -1.06445300 | 0.22476200  | -0.33995100 |
| H  | -1.29877200 | 0.80142300  | -1.24803700 |
| C  | -2.37098000 | -0.26928500 | 0.31584300  |
| O  | -0.43365100 | -0.99516700 | -0.65202900 |
| C  | 3.16325000  | -1.12459500 | -1.14624500 |
| O  | 2.02890300  | -1.15458700 | -1.69251500 |
| O  | 4.24064200  | -1.56065200 | -1.57771400 |
| H  | 0.43849900  | -0.92058600 | -1.11337600 |
| C  | -3.31053700 | -0.88084100 | -0.71496700 |
| H  | -2.70161100 | -1.55382700 | -1.32910100 |
| C  | -4.48139900 | -1.65774700 | -0.11674000 |
| H  | -3.67990200 | -0.08277000 | -1.37216200 |
| C  | -5.34339900 | -2.30141800 | -1.20123100 |
| H  | -6.17897100 | -2.85590500 | -0.76598900 |
| H  | -5.75692300 | -1.54098600 | -1.87167600 |
| H  | -4.75492200 | -2.99767800 | -1.80733900 |
| H  | -5.09656300 | -0.98881300 | 0.49466300  |
| H  | -4.09086200 | -2.43259100 | 0.55495600  |
| H  | -2.08966100 | -1.01129400 | 1.06908600  |
| Cl | -3.25475300 | 1.01057600  | 1.25247400  |
| C  | 1.26338800  | 3.17845800  | -0.90987900 |
| C  | -0.54345100 | 2.64269500  | 0.45555400  |

|   |             |            |             |
|---|-------------|------------|-------------|
| H | 1.71763500  | 3.73443200 | -0.07741600 |
| H | 1.50986200  | 3.68423200 | -1.84381100 |
| H | -1.61919900 | 2.78147200 | 0.52270400  |
| H | -0.06730300 | 3.19649000 | 1.27780300  |
| O | -0.14185100 | 3.18346200 | -0.78386100 |

(R)-TS3<sub>G</sub>-Cl-Pre

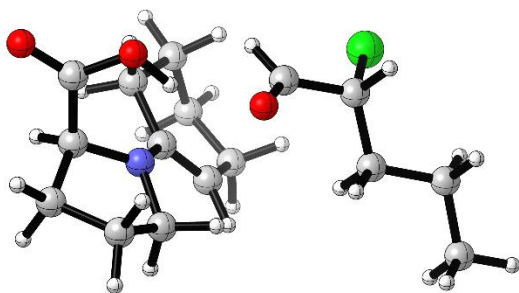

-----  
- Thermochemistry -  
-----

|                                              |                             |
|----------------------------------------------|-----------------------------|
| Zero-point correction=                       | 0.408971 (Hartree/Particle) |
| Thermal correction to Energy=                | 0.428531                    |
| Thermal correction to Enthalpy=              | 0.429396                    |
| Thermal correction to Gibbs Free Energy=     | 0.361325                    |
| Sum of electronic and zero-point Energies=   | -1365.215716                |
| Sum of electronic and thermal Energies=      | -1365.196156                |
| Sum of electronic and thermal Enthalpies=    | -1365.195291                |
| Sum of electronic and thermal Free Energies= | -1365.263362                |

Number of Imaginary Frequencies = 0

E (Single Point Energy) [IEFPCM(DCM)M06-2X/6-311++G(2d,2p)] = -1365.903524

|   |             |             |             |
|---|-------------|-------------|-------------|
| C | 0.25195000  | 0.84140400  | -1.56047800 |
| H | 0.54593900  | -0.06218300 | -2.08649300 |
| C | -0.87987600 | 0.84207800  | -0.82356200 |
| N | -1.67454800 | -0.29907700 | -0.66910400 |
| C | -3.10373600 | -0.19498500 | -0.37779700 |
| H | -3.55138800 | 0.72985500  | -0.75247100 |

|   |             |             |             |
|---|-------------|-------------|-------------|
| C | -1.37924000 | -1.49909900 | -1.45264000 |
| H | -0.41427400 | -1.91774900 | -1.14916400 |
| H | -1.33083600 | -1.25941400 | -2.52713500 |
| C | -2.55843200 | -2.41572600 | -1.14713900 |
| H | -2.41070600 | -2.91258700 | -0.18177400 |
| H | -2.69949700 | -3.18375700 | -1.90952000 |
| C | -3.72443200 | -1.42637400 | -1.07680500 |
| H | -4.03042400 | -1.13669500 | -2.08597800 |
| H | -4.60210700 | -1.80271000 | -0.54771900 |
| C | -1.33133800 | 2.06649300  | -0.05380000 |
| H | -2.20069500 | 2.51346200  | -0.55421300 |
| H | -1.67487300 | 1.76537000  | 0.94489200  |
| C | 0.45330000  | 3.33838100  | -1.27857700 |
| C | 0.86347900  | -0.46617400 | 1.42613700  |
| H | 0.42451300  | 0.51917900  | 1.66585600  |
| C | 2.37365200  | -0.54591000 | 1.29226900  |
| O | 0.17669500  | -1.45951000 | 1.32296300  |
| C | -3.40492100 | -0.24288800 | 1.12197800  |
| O | -2.45349300 | -0.73259100 | 1.91315900  |
| O | -4.47411300 | 0.10858400  | 1.57184200  |
| C | 2.81579300  | -1.21090100 | -0.00771200 |
| H | 2.22595600  | -2.13180500 | -0.09978900 |
| C | 4.30571700  | -1.54053300 | -0.05046700 |
| H | 4.88737300  | -0.61863500 | 0.05811400  |
| H | 4.55783300  | -2.17885700 | 0.80525500  |
| H | 2.54176200  | -0.56202600 | -0.84756900 |
| C | 4.68719500  | -2.24120600 | -1.35278500 |
| H | 5.75507700  | -2.47268300 | -1.37776800 |

|    |             |             |             |
|----|-------------|-------------|-------------|
| H  | 4.13540900  | -3.17953000 | -1.46914900 |
| H  | 4.45952400  | -1.60806300 | -2.21639000 |
| H  | -1.64097700 | -0.95589500 | 1.40444700  |
| H  | 2.74052300  | -1.11686200 | 2.15217500  |
| Cl | 3.06220900  | 1.11009800  | 1.47173800  |
| C  | -0.22263700 | 3.11249300  | 0.07175800  |
| H  | -0.64320600 | 4.04306000  | 0.46438100  |
| H  | 0.53063700  | 2.76828300  | 0.79309000  |
| C  | 1.13593700  | 2.05115400  | -1.74168900 |
| H  | 2.07690200  | 1.91755300  | -1.18765200 |
| H  | 1.41755800  | 2.13388800  | -2.79801300 |
| H  | -0.30539800 | 3.63746900  | -2.01394700 |
| H  | 1.18248300  | 4.15211700  | -1.21514000 |

(R)-TS3<sub>G</sub>-Cl

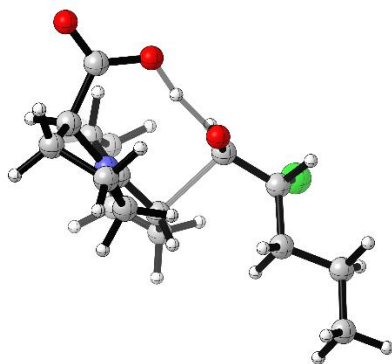

-----  
- Thermochemistry -  
-----

|                                              |                             |
|----------------------------------------------|-----------------------------|
| Zero-point correction=                       | 0.409042 (Hartree/Particle) |
| Thermal correction to Energy=                | 0.426929                    |
| Thermal correction to Enthalpy=              | 0.427794                    |
| Thermal correction to Gibbs Free Energy=     | 0.364421                    |
| Sum of electronic and zero-point Energies=   | -1365.201903                |
| Sum of electronic and thermal Energies=      | -1365.184016                |
| Sum of electronic and thermal Enthalpies=    | -1365.183151                |
| Sum of electronic and thermal Free Energies= | -1365.246524                |



Number of Imaginary Frequencies = 1

E (Single Point Energy) [IEFPCM(DCM)M06-2X/6-311++G(2d,2p)] = -1365.888196

|   |             |             |             |
|---|-------------|-------------|-------------|
| C | 0.43112200  | 0.65116100  | -1.05208900 |
| H | 0.75151500  | -0.28853100 | -1.48791000 |
| C | -0.93082400 | 0.76950500  | -0.78013100 |
| N | -1.72814600 | -0.30787400 | -0.75732100 |
| C | -3.12899700 | -0.28517900 | -0.33455100 |
| H | -3.64153300 | 0.60449700  | -0.70722900 |
| C | -1.34521900 | -1.62074400 | -1.31960700 |
| H | -0.40602700 | -1.96376600 | -0.88834300 |
| H | -1.23297100 | -1.51893600 | -2.40693700 |
| C | -2.51925700 | -2.52214200 | -0.94621900 |
| H | -2.36877900 | -2.92869700 | 0.05962100  |
| H | -2.63221900 | -3.35624700 | -1.64020400 |
| C | -3.71118200 | -1.56363200 | -0.96043600 |
| H | -4.01479000 | -1.34885500 | -1.98916300 |
| H | -4.58066200 | -1.92205600 | -0.40820100 |
| C | -1.52354600 | 2.08764800  | -0.34084400 |
| H | -2.32657000 | 2.34654700  | -1.04315600 |
| H | -1.99964900 | 1.96446000  | 0.64071100  |
| C | 0.41789400  | 3.14223400  | -1.51850000 |
| C | 0.77819800  | 0.03877400  | 1.00622700  |
| H | 0.53877200  | 1.03649200  | 1.40272900  |
| C | 2.27454600  | -0.31102700 | 1.02968000  |
| O | 0.00588300  | -0.93668900 | 1.24122900  |
| C | -3.32998700 | -0.28413800 | 1.19232200  |
| O | -2.30056200 | -0.48112100 | 1.97753300  |

|    |             |             |             |
|----|-------------|-------------|-------------|
| O  | -4.45510500 | -0.10903500 | 1.62609000  |
| C  | 2.83920000  | -1.06963700 | -0.16054500 |
| H  | 2.09686700  | -1.83721000 | -0.42100800 |
| C  | 4.18159400  | -1.74043000 | 0.12413100  |
| H  | 4.91603500  | -0.97856500 | 0.40818800  |
| H  | 4.07251500  | -2.41256600 | 0.98402400  |
| H  | 2.93302800  | -0.39473600 | -1.01948900 |
| C  | 4.68987200  | -2.52256600 | -1.08507600 |
| H  | 5.65029900  | -2.99915200 | -0.87256500 |
| H  | 3.98052600  | -3.30608000 | -1.37096900 |
| H  | 4.82558900  | -1.86180800 | -1.94743600 |
| H  | -1.35000600 | -0.65767200 | 1.55746400  |
| H  | 2.37701500  | -0.93004500 | 1.92652400  |
| Cl | 3.26010600  | 1.16493400  | 1.40362200  |
| C  | -0.49598900 | 3.22107400  | -0.29949200 |
| H  | -1.02548000 | 4.17652900  | -0.25495000 |
| H  | 0.11121800  | 3.15114300  | 0.61200700  |
| C  | 1.25864100  | 1.86687300  | -1.44036000 |
| H  | 2.07473700  | 2.02589900  | -0.72852900 |
| H  | 1.73362100  | 1.66775700  | -2.40775100 |
| H  | -0.19565600 | 3.13220800  | -2.42910600 |
| H  | 1.06967900  | 4.01875100  | -1.57452100 |

(R)-TS3<sub>G</sub>-Cl-P

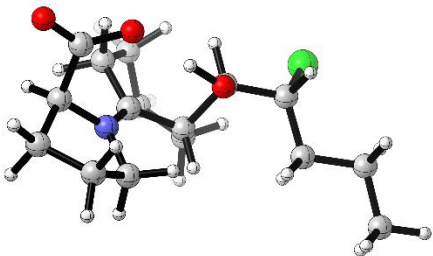

-----  
- Thermochemistry -  
-----

|                                              |                             |
|----------------------------------------------|-----------------------------|
| Zero-point correction=                       | 0.413385 (Hartree/Particle) |
| Thermal correction to Energy=                | 0.431387                    |
| Thermal correction to Enthalpy=              | 0.432252                    |
| Thermal correction to Gibbs Free Energy=     | 0.368810                    |
| Sum of electronic and zero-point Energies=   | -1365.228474                |
| Sum of electronic and thermal Energies=      | -1365.210473                |
| Sum of electronic and thermal Enthalpies=    | -1365.209608                |
| Sum of electronic and thermal Free Energies= | -1365.273050                |

Number of Imaginary Frequencies = 0

E (Single Point Energy) [IEFPCM(DCM)M06-2X/6-311++G(2d,2p)] = -1365.918739

|   |             |             |             |
|---|-------------|-------------|-------------|
| C | 0.45005100  | 0.39608100  | -0.75346000 |
| H | 0.60032000  | -0.56048200 | -1.25512500 |
| C | -1.01647700 | 0.67621400  | -0.61874800 |
| N | -1.89349500 | -0.26271500 | -0.74709200 |
| C | -3.29718100 | -0.12766800 | -0.31311500 |
| H | -3.70545000 | 0.83217200  | -0.63186700 |
| C | -1.61825200 | -1.66395700 | -1.18920500 |
| H | -0.76092100 | -2.05572400 | -0.64560100 |
| H | -1.40418200 | -1.63112000 | -2.26144400 |
| C | -2.91863900 | -2.40791500 | -0.88564500 |
| H | -2.88394300 | -2.81912900 | 0.12766000  |
| H | -3.07789700 | -3.22915100 | -1.58539200 |
| C | -3.98789900 | -1.31747300 | -0.97602900 |

|    |             |             |             |
|----|-------------|-------------|-------------|
| H  | -4.21791100 | -1.08537900 | -2.02060600 |
| H  | -4.91327000 | -1.56465700 | -0.45590900 |
| C  | -1.44025200 | 2.05257400  | -0.18025100 |
| H  | -2.28931900 | 2.35726100  | -0.80298600 |
| H  | -1.81603700 | 1.97751900  | 0.84818500  |
| C  | 0.43139700  | 2.83653700  | -1.62113100 |
| C  | 0.89653200  | 0.16043300  | 0.73951700  |
| H  | 0.67817900  | 1.05300400  | 1.33986800  |
| C  | 2.38831900  | -0.17995500 | 0.92061300  |
| O  | 0.21154900  | -0.95840500 | 1.25067900  |
| C  | -3.37987600 | -0.19870400 | 1.25601500  |
| O  | -2.29796800 | -0.29386100 | 1.89685300  |
| O  | -4.53530700 | -0.14564100 | 1.70031300  |
| C  | 2.97050600  | -1.10394900 | -0.13604100 |
| H  | 2.25454900  | -1.93103200 | -0.24710300 |
| C  | 4.34159800  | -1.67349500 | 0.22261500  |
| H  | 5.05883000  | -0.85343500 | 0.33587200  |
| H  | 4.27714400  | -2.17503600 | 1.19601200  |
| H  | 3.02246400  | -0.58688100 | -1.10287900 |
| C  | 4.84218000  | -2.65501500 | -0.83494900 |
| H  | 5.82457200  | -3.05456300 | -0.57028900 |
| H  | 4.15308400  | -3.49881300 | -0.94372000 |
| H  | 4.92993700  | -2.16533200 | -1.81035700 |
| H  | -0.71541900 | -0.71327700 | 1.50596400  |
| H  | 2.45528700  | -0.65133600 | 1.90312300  |
| Cl | 3.38746800  | 1.33204800  | 1.09758000  |
| C  | -0.32207500 | 3.09103900  | -0.31938100 |
| H  | -0.77127000 | 4.08689200  | -0.30614600 |

|   |             |            |             |
|---|-------------|------------|-------------|
| H | 0.37122700  | 3.04534700 | 0.52795100  |
| C | 1.19090800  | 1.50448000 | -1.54816000 |
| H | 2.16668500  | 1.67513200 | -1.09318800 |
| H | 1.37757700  | 1.12885100 | -2.55805300 |
| H | -0.29183100 | 2.81520200 | -2.44700800 |
| H | 1.13387900  | 3.64604000 | -1.83481800 |

(S)-TS3<sub>G</sub>-Cl-Pre

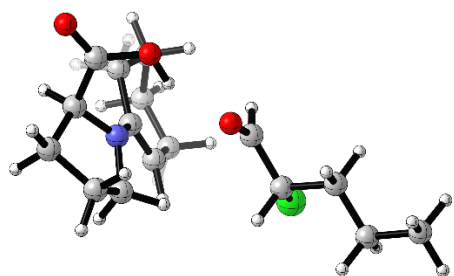

-----  
- Thermochemistry -  
-----

|                                              |                             |
|----------------------------------------------|-----------------------------|
| Zero-point correction=                       | 0.408940 (Hartree/Particle) |
| Thermal correction to Energy=                | 0.428585                    |
| Thermal correction to Enthalpy=              | 0.429450                    |
| Thermal correction to Gibbs Free Energy=     | 0.360176                    |
| Sum of electronic and zero-point Energies=   | -1365.214185                |
| Sum of electronic and thermal Energies=      | -1365.194539                |
| Sum of electronic and thermal Enthalpies=    | -1365.193674                |
| Sum of electronic and thermal Free Energies= | -1365.262948                |

Number of Imaginary Frequencies = 0

E (Single Point Energy) [IEFPCM<sub>(DCM)</sub>M06-2X/6-311++G(2d,2p)] = -1365.901816

|   |             |             |            |
|---|-------------|-------------|------------|
| C | 0.48089200  | 1.69985200  | 0.98085800 |
| H | -0.10405800 | 1.21341500  | 1.75734100 |
| C | 1.46561400  | 1.01847700  | 0.35402100 |
| N | 1.74128600  | -0.32407600 | 0.62709700 |
| C | 3.05267700  | -0.90956400 | 0.34765800 |

|    |             |             |             |
|----|-------------|-------------|-------------|
| H  | 3.86073100  | -0.17287800 | 0.36819400  |
| C  | 1.10672700  | -0.97818400 | 1.77239800  |
| H  | 0.02854800  | -1.06714600 | 1.61006900  |
| H  | 1.26990500  | -0.39073600 | 2.68995400  |
| C  | 1.81193000  | -2.32786000 | 1.84563100  |
| H  | 1.37899900  | -3.01895500 | 1.11382600  |
| H  | 1.73924100  | -2.78373900 | 2.83448300  |
| C  | 3.24680800  | -1.96128400 | 1.46101100  |
| H  | 3.75123000  | -1.48655200 | 2.30738200  |
| H  | 3.85393300  | -2.80454900 | 1.12723000  |
| C  | 2.29566400  | 1.64541700  | -0.74844300 |
| H  | 3.30507000  | 1.85356700  | -0.36895100 |
| H  | 2.41491100  | 0.92858800  | -1.56999200 |
| C  | 1.25136200  | 3.83545200  | -0.11801700 |
| C  | -1.32306000 | -0.07308200 | -0.78571500 |
| H  | -1.12955800 | 0.86799600  | -1.32800700 |
| C  | -2.57027700 | -0.14578700 | 0.07648600  |
| O  | -0.62130300 | -1.05275500 | -0.91986900 |
| C  | 3.12380500  | -1.57900800 | -1.02904600 |
| O  | 1.98081500  | -1.73890500 | -1.68795500 |
| O  | 4.17441100  | -1.97092900 | -1.48975900 |
| H  | 1.22738400  | -1.34828300 | -1.19218800 |
| C  | -3.65115300 | -0.95508600 | -0.64403100 |
| H  | -3.19337100 | -1.91899600 | -0.89908000 |
| H  | -2.31692900 | -0.61392000 | 1.03152200  |
| Cl | -3.13592700 | 1.52168200  | 0.45368900  |
| C  | -4.90697800 | -1.18719300 | 0.19291600  |
| H  | -5.36593200 | -0.22454800 | 0.44060600  |

|   |             |             |             |
|---|-------------|-------------|-------------|
| H | -3.90796400 | -0.45509300 | -1.58646200 |
| H | -4.62263400 | -1.65875600 | 1.14166300  |
| C | -5.91534400 | -2.06604700 | -0.54455200 |
| H | -6.81263300 | -2.22545900 | 0.05880100  |
| H | -6.22138900 | -1.60056400 | -1.48689000 |
| H | -5.48596200 | -3.04559700 | -0.77739700 |
| C | 1.67699800  | 2.93903000  | -1.27765200 |
| C | 0.15179200  | 3.14399900  | 0.68651300  |
| H | 2.39483200  | 3.44567400  | -1.92961200 |
| H | 0.79726000  | 2.70083400  | -1.89044000 |
| H | 2.11975800  | 4.02541200  | 0.52669900  |
| H | 0.89974000  | 4.80516500  | -0.48406500 |
| H | -0.79620500 | 3.20680900  | 0.13267200  |
| H | -0.01927200 | 3.67417100  | 1.63068000  |

(S)-TS3<sub>G</sub>-Cl

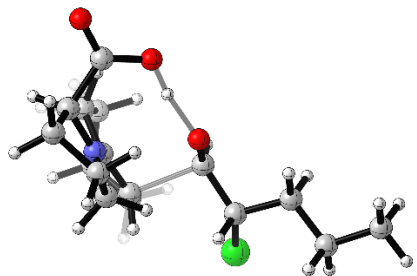

-----  
 - Thermochemistry -  
 -----

|                                              |                             |
|----------------------------------------------|-----------------------------|
| Zero-point correction=                       | 0.408984 (Hartree/Particle) |
| Thermal correction to Energy=                | 0.426870                    |
| Thermal correction to Enthalpy=              | 0.427735                    |
| Thermal correction to Gibbs Free Energy=     | 0.364491                    |
| Sum of electronic and zero-point Energies=   | -1365.202940                |
| Sum of electronic and thermal Energies=      | -1365.185053                |
| Sum of electronic and thermal Enthalpies=    | -1365.184188                |
| Sum of electronic and thermal Free Energies= | -1365.247432                |

Number of Imaginary Frequencies = 1

E (Single Point Energy) [IEFPCM(DCM)M06-2X/6-311++G(2d,2p)] = -1365.889090

|   |             |             |             |
|---|-------------|-------------|-------------|
| C | 0.03912200  | 1.48353800  | 0.73632400  |
| H | -0.38577600 | 1.05747600  | 1.64113000  |
| C | 1.29739600  | 1.01375500  | 0.35036600  |
| N | 1.74766000  | -0.17757800 | 0.76248900  |
| C | 3.01358100  | -0.77668500 | 0.33205100  |
| H | 3.81429500  | -0.03352500 | 0.31136000  |
| C | 1.11349300  | -0.95763500 | 1.84273400  |
| H | 0.05132400  | -1.08679700 | 1.64295000  |
| H | 1.24389600  | -0.42230500 | 2.79239700  |
| C | 1.87715100  | -2.27773400 | 1.82048700  |
| H | 1.43917500  | -2.94456000 | 1.07003500  |
| H | 1.85403200  | -2.78269900 | 2.78716100  |
| C | 3.28423100  | -1.85056000 | 1.39995100  |
| H | 3.80860500  | -1.39025700 | 2.24233500  |
| H | 3.90032600  | -2.66024000 | 1.00751700  |
| C | 2.14781900  | 1.74672800  | -0.66227500 |
| H | 3.09271500  | 2.00291300  | -0.16420000 |
| H | 2.40542300  | 1.07256100  | -1.48696200 |
| C | 0.80029000  | 3.76880100  | -0.07360600 |
| C | -1.01782000 | 0.13475900  | -0.56287300 |
| H | -1.05776500 | 0.92179500  | -1.33200400 |
| C | -2.32647500 | -0.11998200 | 0.19346700  |
| O | -0.34904300 | -0.92327400 | -0.75141100 |
| C | 2.98682300  | -1.39837900 | -1.07770900 |
| O | 1.85457400  | -1.48090600 | -1.73287300 |



|    |             |             |             |
|----|-------------|-------------|-------------|
| O  | 4.03600500  | -1.80065900 | -1.54657600 |
| H  | 0.98441000  | -1.15526100 | -1.26725100 |
| C  | -3.23215100 | -1.01294200 | -0.65616200 |
| H  | -2.63019900 | -1.88734200 | -0.92753000 |
| H  | -2.10347300 | -0.60990300 | 1.14469400  |
| Cl | -3.20224500 | 1.40309000  | 0.62042200  |
| C  | -4.50700000 | -1.46906200 | 0.05071400  |
| H  | -5.12659000 | -0.60081700 | 0.29687200  |
| H  | -3.48033600 | -0.48656400 | -1.58744300 |
| H  | -4.23782600 | -1.94686000 | 1.00137900  |
| C  | -5.30649400 | -2.44484700 | -0.81109500 |
| H  | -6.21984600 | -2.76451200 | -0.30239300 |
| H  | -5.59476500 | -1.97971600 | -1.75941100 |
| H  | -4.71747900 | -3.33826900 | -1.04179200 |
| C  | 1.49846300  | 3.02003900  | -1.20278400 |
| C  | -0.36495300 | 2.91874400  | 0.42834900  |
| H  | 2.26670500  | 3.63227500  | -1.68277700 |
| H  | 0.76216700  | 2.76587900  | -1.97571300 |
| H  | 1.51414000  | 3.95802900  | 0.73907100  |
| H  | 0.43214200  | 4.73945500  | -0.41902000 |
| H  | -1.15011700 | 2.93656900  | -0.33886000 |
| H  | -0.81377600 | 3.36068000  | 1.32309800  |

(S)-TS3<sub>G</sub>-Cl-P

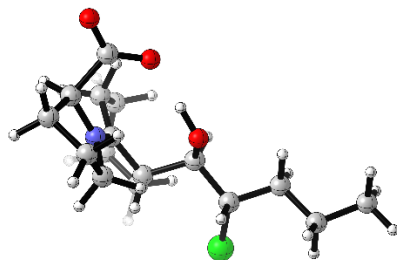

-----  
- Thermochemistry -  
-----

|                                              |                             |
|----------------------------------------------|-----------------------------|
| Zero-point correction=                       | 0.412514 (Hartree/Particle) |
| Thermal correction to Energy=                | 0.430591                    |
| Thermal correction to Enthalpy=              | 0.431456                    |
| Thermal correction to Gibbs Free Energy=     | 0.367159                    |
| Sum of electronic and zero-point Energies=   | -1365.226895                |
| Sum of electronic and thermal Energies=      | -1365.208818                |
| Sum of electronic and thermal Enthalpies=    | -1365.207953                |
| Sum of electronic and thermal Free Energies= | -1365.272250                |

Number of Imaginary Frequencies = 0

E (Single Point Energy) [IEFPCM<sub>(DCM)</sub>M06-2X/6-311++G(2d,2p)] = -1365.916168

|   |             |             |             |
|---|-------------|-------------|-------------|
| C | -0.19960400 | 1.15668000  | 0.53203200  |
| H | -0.30434100 | 0.86815600  | 1.58154400  |
| C | 1.23262600  | 0.95333400  | 0.11829300  |
| N | 1.94458400  | 0.03999300  | 0.69320600  |
| C | 3.26584600  | -0.39863600 | 0.19914300  |
| H | 3.88510400  | 0.46827900  | -0.03735600 |
| C | 1.51572500  | -0.79706600 | 1.85301600  |
| H | 0.50875900  | -1.17068700 | 1.68296900  |
| H | 1.54106300  | -0.15915700 | 2.74206800  |
| C | 2.56886400  | -1.90090200 | 1.91277000  |
| H | 2.27122900  | -2.73244300 | 1.26644200  |
| H | 2.69170200  | -2.27860700 | 2.92847400  |
| C | 3.82262600  | -1.22240200 | 1.35933000  |

|    |             |             |             |
|----|-------------|-------------|-------------|
| H  | 4.26779800  | -0.56304900 | 2.11101600  |
| H  | 4.58182200  | -1.91904100 | 1.00469000  |
| C  | 1.82663100  | 1.72791600  | -1.02763900 |
| H  | 2.79248100  | 2.12069900  | -0.68618000 |
| H  | 2.04374200  | 1.02081100  | -1.83620100 |
| C  | 0.34099200  | 3.56413500  | -0.27241200 |
| C  | -1.04863900 | 0.13414500  | -0.32521300 |
| H  | -1.25083800 | 0.61358800  | -1.29601600 |
| C  | -2.38188600 | -0.27942200 | 0.33499700  |
| O  | -0.42452300 | -1.11170800 | -0.49493000 |
| C  | 3.11653300  | -1.25304400 | -1.11401400 |
| O  | 1.96532100  | -1.37420400 | -1.61275100 |
| O  | 4.18798700  | -1.71496900 | -1.53188300 |
| H  | 0.43758700  | -1.08774000 | -0.98659100 |
| C  | -3.31606500 | -0.93250000 | -0.67495100 |
| H  | -2.70892400 | -1.64877700 | -1.24065100 |
| H  | -2.12653400 | -0.98186700 | 1.13379500  |
| Cl | -3.25214700 | 1.06806400  | 1.18242700  |
| C  | -4.50952100 | -1.65568400 | -0.05479500 |
| H  | -5.11988500 | -0.94391200 | 0.51139600  |
| H  | -3.66163000 | -0.16679300 | -1.38196900 |
| H  | -4.14294600 | -2.40061400 | 0.66265100  |
| C  | -5.36875300 | -2.34010600 | -1.11628000 |
| H  | -6.22057900 | -2.85549700 | -0.66474000 |
| H  | -5.75873200 | -1.60881800 | -1.83182000 |
| H  | -4.78547600 | -3.07811800 | -1.67630800 |
| C  | 0.95378300  | 2.89140900  | -1.49401200 |
| C  | -0.68869300 | 2.62269100  | 0.35067200  |

|   |             |            |             |
|---|-------------|------------|-------------|
| H | 1.57225200  | 3.58028000 | -2.07411200 |
| H | 0.15746800  | 2.53762400 | -2.15976600 |
| H | 1.13472600  | 3.80931000 | 0.44597200  |
| H | -0.15085200 | 4.50328000 | -0.53939600 |
| H | -1.56872600 | 2.61603100 | -0.29951600 |
| H | -1.02493100 | 3.00378500 | 1.31679400  |

(R)-TS3<sub>0</sub>-Cl-Pre

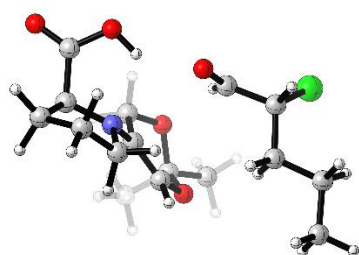

-----  
- Thermochemistry -  
-----

|                                              |                             |
|----------------------------------------------|-----------------------------|
| Zero-point correction=                       | 0.416672 (Hartree/Particle) |
| Thermal correction to Energy=                | 0.438339                    |
| Thermal correction to Enthalpy=              | 0.439204                    |
| Thermal correction to Gibbs Free Energy=     | 0.365498                    |
| Sum of electronic and zero-point Energies=   | -1515.593202                |
| Sum of electronic and thermal Energies=      | -1515.571535                |
| Sum of electronic and thermal Enthalpies=    | -1515.570670                |
| Sum of electronic and thermal Free Energies= | -1515.644377                |

Number of Imaginary Frequencies = 0

E (Single Point Energy) [IEFPCM(DCM)M06-2X/6-311++G(2d,2p)] = -1516.336463

|   |             |             |            |
|---|-------------|-------------|------------|
| C | -0.09905300 | 0.87518600  | 1.29666200 |
| H | -0.30237300 | 0.26134000  | 2.16514400 |
| C | 0.96287400  | 0.72128300  | 0.48829100 |
| N | 1.91140100  | -0.29701800 | 0.64081600 |
| C | 3.31128000  | -0.04792700 | 0.28726000 |

|   |             |             |             |
|---|-------------|-------------|-------------|
| H | 3.57668700  | 1.01435400  | 0.31526000  |
| C | 1.81545900  | -1.17712100 | 1.80637300  |
| H | 0.93483300  | -1.82166600 | 1.71526000  |
| H | 1.72520800  | -0.59013800 | 2.73502400  |
| C | 3.13819900  | -1.93439600 | 1.77727800  |
| H | 3.09580200  | -2.74170700 | 1.03830300  |
| H | 3.39284600  | -2.36639500 | 2.74637900  |
| C | 4.11897200  | -0.84378100 | 1.33692900  |
| H | 4.34647300  | -0.18411600 | 2.17890000  |
| H | 5.05937300  | -1.22078700 | 0.93145100  |
| C | 1.07526400  | 1.59199300  | -0.73894500 |
| H | 1.86470300  | 2.35089000  | -0.63839000 |
| H | 1.31145700  | 0.98170700  | -1.61814700 |
| O | -1.09485700 | 1.79589100  | 1.07085500  |
| O | -0.17370000 | 2.20267400  | -1.02050200 |
| C | -0.79051000 | 2.80250500  | 0.10427200  |
| C | -2.11817100 | 3.34387600  | -0.37802000 |
| H | -2.68141100 | 2.54112500  | -0.86032800 |
| H | -1.95104200 | 4.15101700  | -1.09423300 |
| C | 0.09254000  | 3.87088900  | 0.74004900  |
| H | 0.41622700  | 4.58188900  | -0.02444200 |
| H | 0.97150700  | 3.43318500  | 1.21910600  |
| H | -0.48090100 | 4.40337400  | 1.50161600  |
| C | -0.93000600 | -1.15413900 | -1.20752600 |
| H | -0.84880100 | -0.09394600 | -1.50994600 |
| C | -2.32075400 | -1.64277300 | -0.86594400 |
| O | 0.03755600  | -1.88042700 | -1.12607100 |
| C | 3.64550100  | -0.54585100 | -1.12339600 |

|    |             |             |             |
|----|-------------|-------------|-------------|
| O  | 2.72725500  | -1.28658600 | -1.73555300 |
| O  | 4.70986600  | -0.30008700 | -1.64801400 |
| H  | -2.68926100 | 3.72782500  | 0.46969600  |
| C  | -2.68419900 | -1.24823100 | 0.56403600  |
| H  | -1.90587500 | -1.67884700 | 1.20932400  |
| C  | -4.05326100 | -1.75323600 | 1.01483900  |
| H  | -4.83092100 | -1.31634400 | 0.37987600  |
| H  | -4.10074700 | -2.84022000 | 0.87574100  |
| H  | -2.62183500 | -0.15695800 | 0.66430700  |
| C  | -4.32138800 | -1.40114000 | 2.47677500  |
| H  | -5.30552000 | -1.75599300 | 2.79332200  |
| H  | -3.57164100 | -1.85452500 | 3.13315400  |
| H  | -4.28882100 | -0.31729900 | 2.62755100  |
| H  | 1.91155900  | -1.36338700 | -1.18974800 |
| H  | -2.37131400 | -2.72421500 | -1.00821500 |
| Cl | -3.45537900 | -0.90209300 | -2.06123400 |

(R)-TS3<sub>o</sub>-Cl

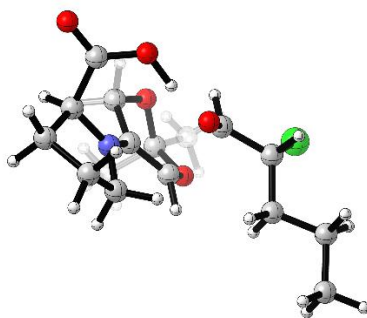

-----  
 - Thermochemistry -  
 -----

|                                 |                             |
|---------------------------------|-----------------------------|
| Zero-point correction=          | 0.415698 (Hartree/Particle) |
| Thermal correction to Energy=   | 0.435638                    |
| Thermal correction to Enthalpy= | 0.436503                    |

|                                              |              |
|----------------------------------------------|--------------|
| Thermal correction to Gibbs Free Energy=     | 0.368870     |
| Sum of electronic and zero-point Energies=   | -1515.578488 |
| Sum of electronic and thermal Energies=      | -1515.558548 |
| Sum of electronic and thermal Enthalpies=    | -1515.557683 |
| Sum of electronic and thermal Free Energies= | -1515.625316 |

Number of Imaginary Frequencies = 1

E (Single Point Energy) [IEFPCM(DCM)M06-2X/6-311++G(2d,2p)] = -1516.319628

|   |             |             |             |
|---|-------------|-------------|-------------|
| C | -0.42402200 | 0.46841500  | 0.80107400  |
| H | -0.73062000 | -0.32460600 | 1.47282600  |
| C | 0.92458700  | 0.66601500  | 0.52654900  |
| N | 1.82996100  | -0.29432900 | 0.72129400  |
| C | 3.22007200  | -0.20703600 | 0.27076700  |
| H | 3.62165300  | 0.79811600  | 0.42661600  |
| C | 1.58735300  | -1.48220000 | 1.56655300  |
| H | 0.69590200  | -2.01302900 | 1.23296800  |
| H | 1.45325700  | -1.15274400 | 2.60508500  |
| C | 2.86136300  | -2.30376300 | 1.38184900  |
| H | 2.76656000  | -2.93989000 | 0.49557500  |
| H | 3.06441500  | -2.94161300 | 2.24297600  |
| C | 3.93673000  | -1.23712500 | 1.16014400  |
| H | 4.20534000  | -0.76342200 | 2.10868100  |
| H | 4.84478600  | -1.61145100 | 0.68669100  |
| C | 1.32552300  | 1.92483500  | -0.19905600 |
| H | 2.04502300  | 2.49735200  | 0.40434700  |
| H | 1.80416500  | 1.68199800  | -1.15481100 |
| O | -1.32139400 | 1.51613600  | 0.78439700  |
| O | 0.18630400  | 2.69322300  | -0.51931100 |
| C | -0.75836300 | 2.80379400  | 0.53272700  |
| C | -1.88084200 | 3.67168200  | 0.01057700  |

|    |             |             |             |
|----|-------------|-------------|-------------|
| H  | -2.24343000 | 3.26055900  | -0.93338700 |
| H  | -1.51857500 | 4.68995600  | -0.14559400 |
| C  | -0.13297400 | 3.35262200  | 1.81212200  |
| H  | 0.40945600  | 4.27544100  | 1.59042600  |
| H  | 0.55352200  | 2.63960500  | 2.27564300  |
| H  | -0.92678600 | 3.57069400  | 2.52915500  |
| C  | -0.64691000 | -0.54009600 | -1.04847300 |
| H  | -0.47508400 | 0.37884500  | -1.63074300 |
| C  | -2.11720000 | -0.97737100 | -0.99783100 |
| O  | 0.19054700  | -1.49553800 | -1.09727900 |
| C  | 3.43061400  | -0.52769400 | -1.22280800 |
| O  | 2.43173200  | -0.98251000 | -1.93157800 |
| O  | 4.54074200  | -0.34534700 | -1.69140500 |
| H  | -2.69817000 | 3.68720500  | 0.73437300  |
| C  | -2.59368000 | -1.65116800 | 0.27970200  |
| H  | -1.77380400 | -2.29867400 | 0.62166800  |
| C  | -3.85681400 | -2.48908500 | 0.09070700  |
| H  | -4.66218600 | -1.84991200 | -0.28835100 |
| H  | -3.67017400 | -3.25265100 | -0.67417600 |
| H  | -2.76676000 | -0.89051400 | 1.04996000  |
| C  | -4.29481300 | -3.15501800 | 1.39322400  |
| H  | -5.19663700 | -3.75511400 | 1.24711000  |
| H  | -3.51011700 | -3.81420300 | 1.77870500  |
| H  | -4.51037500 | -2.40488000 | 2.16099900  |
| H  | 1.48544900  | -1.17184800 | -1.47539600 |
| H  | -2.19395400 | -1.68879900 | -1.82702300 |
| Cl | -3.21116200 | 0.38031300  | -1.47582000 |



(R)-TS3<sub>0</sub>-Cl-P

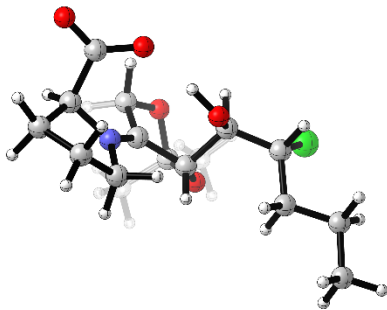

-----  
- Thermochemistry -  
-----

|                                              |                             |
|----------------------------------------------|-----------------------------|
| Zero-point correction=                       | 0.420324 (Hartree/Particle) |
| Thermal correction to Energy=                | 0.440275                    |
| Thermal correction to Enthalpy=              | 0.441141                    |
| Thermal correction to Gibbs Free Energy=     | 0.373824                    |
| Sum of electronic and zero-point Energies=   | -1515.603394                |
| Sum of electronic and thermal Energies=      | -1515.583443                |
| Sum of electronic and thermal Enthalpies=    | -1515.582578                |
| Sum of electronic and thermal Free Energies= | -1515.649894                |

Number of Imaginary Frequencies = 0

E (Single Point Energy) [IEFPCM<sub>(DCM)</sub>M06-2X/6-311++G(2d,2p)] = -1516.348890

|   |             |             |            |
|---|-------------|-------------|------------|
| C | -0.41014700 | 0.21455300  | 0.50441100 |
| H | -0.55571800 | -0.53783200 | 1.28320400 |
| C | 1.04632000  | 0.55844300  | 0.36344500 |
| N | 1.97710600  | -0.25699300 | 0.70430100 |
| C | 3.37365800  | -0.11200900 | 0.25134700 |
| H | 3.69542500  | 0.92776400  | 0.34386800 |
| C | 1.79638500  | -1.53837900 | 1.45583200 |
| H | 0.97570200  | -2.10491200 | 1.02062500 |
| H | 1.56814400  | -1.26951800 | 2.49138800 |
| C | 3.15435600  | -2.22734900 | 1.32255600 |
| H | 3.16557900  | -2.85673800 | 0.42770600 |

|   |             |             |             |
|---|-------------|-------------|-------------|
| H | 3.36431700  | -2.85565000 | 2.18860900  |
| C | 4.13904000  | -1.06585500 | 1.16424000  |
| H | 4.33806000  | -0.59000700 | 2.12924600  |
| H | 5.08496700  | -1.35433100 | 0.70677100  |
| C | 1.35049500  | 1.84922400  | -0.34729400 |
| H | 2.09431900  | 2.42682200  | 0.21834900  |
| H | 1.76233700  | 1.62383000  | -1.33707700 |
| O | -1.23098200 | 1.31620300  | 0.81782400  |
| O | 0.16123400  | 2.57791000  | -0.54235300 |
| C | -0.68561800 | 2.62100400  | 0.59444600  |
| C | -1.84207700 | 3.52711200  | 0.23598000  |
| H | -2.27526600 | 3.20115400  | -0.71081300 |
| H | -1.48992200 | 4.55709000  | 0.14701600  |
| C | 0.04809200  | 3.08187800  | 1.85189200  |
| H | 0.56991200  | 4.02311500  | 1.66009200  |
| H | 0.76939200  | 2.34265900  | 2.21279900  |
| H | -0.68546900 | 3.23733600  | 2.64507800  |
| C | -0.79294600 | -0.41836100 | -0.87838100 |
| H | -0.60687400 | 0.32404700  | -1.66573500 |
| C | -2.26677200 | -0.85205800 | -0.94963000 |
| O | -0.03347300 | -1.58410300 | -1.07456100 |
| C | 3.47683900  | -0.52554000 | -1.26929400 |
| O | 2.39917200  | -0.75390900 | -1.88101100 |
| O | 4.63677500  | -0.55925000 | -1.69755000 |
| H | -2.60312000 | 3.47257100  | 1.01697400  |
| C | -2.78481200 | -1.54644800 | 0.29979600  |
| H | -2.02541600 | -2.28933400 | 0.58412300  |
| C | -4.12507400 | -2.25306700 | 0.10620800  |

|    |             |             |             |
|----|-------------|-------------|-------------|
| H  | -4.88491200 | -1.51877800 | -0.18229600 |
| H  | -4.03889500 | -2.96391400 | -0.72480900 |
| H  | -2.86034200 | -0.81921800 | 1.11820400  |
| C  | -4.56805700 | -2.98485400 | 1.37140100  |
| H  | -5.52878500 | -3.48488300 | 1.22362300  |
| H  | -3.83445000 | -3.74375300 | 1.66261900  |
| H  | -4.67765100 | -2.28597700 | 2.20712700  |
| H  | 0.86202400  | -1.33978400 | -1.41656900 |
| H  | -2.32641600 | -1.52715100 | -1.80658800 |
| Cl | -3.33038800 | 0.54469200  | -1.40083200 |

(S)-TS3<sub>0</sub>-Cl-Pre

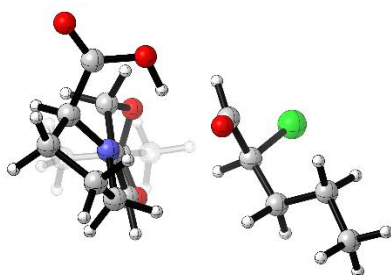

-----  
- Thermochemistry -  
-----

|                                              |                             |
|----------------------------------------------|-----------------------------|
| Zero-point correction=                       | 0.416907 (Hartree/Particle) |
| Thermal correction to Energy=                | 0.438397                    |
| Thermal correction to Enthalpy=              | 0.439262                    |
| Thermal correction to Gibbs Free Energy=     | 0.366707                    |
| Sum of electronic and zero-point Energies=   | -1515.593725                |
| Sum of electronic and thermal Energies=      | -1515.572234                |
| Sum of electronic and thermal Enthalpies=    | -1515.571369                |
| Sum of electronic and thermal Free Energies= | -1515.643925                |

Number of Imaginary Frequencies = 0

E (Single Point Energy) [IEFPCM<sub>(DCM)</sub>M06-2X/6-311++G(2d,2p)] = -1516.337380

|   |            |            |            |
|---|------------|------------|------------|
| C | 0.12541100 | 1.02635500 | 1.50424600 |
|---|------------|------------|------------|

|   |             |             |             |
|---|-------------|-------------|-------------|
| H | -0.02816300 | 0.42583900  | 2.39197200  |
| C | 1.03381700  | 0.75790800  | 0.55064300  |
| N | 1.86254700  | -0.36846600 | 0.56796900  |
| C | 3.20542200  | -0.29768300 | -0.01249200 |
| H | 3.60019300  | 0.72306900  | -0.05316100 |
| C | 1.84191100  | -1.24116600 | 1.74335400  |
| H | 0.88683600  | -1.77467400 | 1.79277000  |
| H | 1.96499200  | -0.65447700 | 2.66820800  |
| C | 3.04493000  | -2.15089500 | 1.51947400  |
| H | 2.79149400  | -2.94659900 | 0.81073100  |
| H | 3.39600000  | -2.61220400 | 2.44386600  |
| C | 4.06761600  | -1.18604900 | 0.91186200  |
| H | 4.50179900  | -0.55907800 | 1.69560000  |
| H | 4.88053300  | -1.67380900 | 0.37132600  |
| C | 1.07006000  | 1.62724700  | -0.68204300 |
| H | 1.92759400  | 2.31485400  | -0.68189300 |
| H | 1.14111200  | 1.01191600  | -1.58534600 |
| O | -0.78433900 | 2.05600900  | 1.41652000  |
| O | -0.14865600 | 2.34486200  | -0.79586400 |
| C | -0.52270500 | 3.01992100  | 0.39204100  |
| C | -1.84004600 | 3.70310700  | 0.09721900  |
| H | -2.24527200 | 4.13324000  | 1.01519100  |
| H | -2.54967600 | 2.97605000  | -0.30641900 |
| C | 0.55191100  | 3.98920600  | 0.87161700  |
| H | 1.43330400  | 3.46193300  | 1.24387400  |
| H | 0.14840500  | 4.59397900  | 1.68625600  |
| H | 0.84554100  | 4.64821800  | 0.05048500  |
| C | -1.16474800 | -0.72289200 | -1.05986400 |

|    |             |             |             |
|----|-------------|-------------|-------------|
| H  | -0.94030300 | -0.09051000 | -1.93793700 |
| C  | -2.38762100 | -0.31957200 | -0.26162300 |
| O  | -0.45309500 | -1.65448300 | -0.75222500 |
| C  | 3.24294300  | -0.83751200 | -1.44690700 |
| O  | 2.16195900  | -1.48118000 | -1.87974900 |
| O  | 4.22192200  | -0.70932100 | -2.14867400 |
| H  | 1.45228600  | -1.47748200 | -1.19903300 |
| H  | -1.68714100 | 4.49821100  | -0.63545400 |
| C  | -2.85429100 | -1.35621000 | 0.74633600  |
| H  | -3.62893500 | -0.90272900 | 1.37410600  |
| H  | -2.13011900 | 0.62032400  | 0.23995900  |
| Cl | -3.67383600 | 0.13417500  | -1.45367000 |
| C  | -3.36395300 | -2.66842400 | 0.15118500  |
| H  | -2.59885400 | -3.09584200 | -0.50573500 |
| H  | -1.99095500 | -1.55552700 | 1.39535400  |
| H  | -4.24396500 | -2.46733700 | -0.46906700 |
| C  | -3.72433700 | -3.67098800 | 1.24584900  |
| H  | -2.84963900 | -3.91232400 | 1.85851000  |
| H  | -4.49608100 | -3.26512500 | 1.90821200  |
| H  | -4.10384600 | -4.60285800 | 0.81879500  |

(S)-TS3<sub>o</sub>-Cl

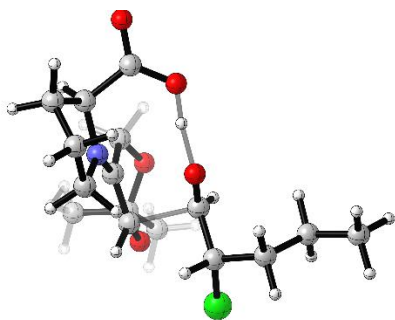

-----  
- Thermochemistry -  
-----

|                                              |                             |
|----------------------------------------------|-----------------------------|
| Zero-point correction=                       | 0.415932 (Hartree/Particle) |
| Thermal correction to Energy=                | 0.435791                    |
| Thermal correction to Enthalpy=              | 0.436656                    |
| Thermal correction to Gibbs Free Energy=     | 0.369175                    |
| Sum of electronic and zero-point Energies=   | -1515.577897                |
| Sum of electronic and thermal Energies=      | -1515.558038                |
| Sum of electronic and thermal Enthalpies=    | -1515.557173                |
| Sum of electronic and thermal Free Energies= | -1515.624654                |

Number of Imaginary Frequencies = 1

E (Single Point Energy) [IEFPCM<sub>(DCM)</sub>M06-2X/6-311++G(2d,2p)] = -1516.318913

|   |             |             |             |
|---|-------------|-------------|-------------|
| C | -0.12290700 | 1.09566100  | 0.86396300  |
| H | -0.30907500 | 0.82990900  | 1.90069500  |
| C | 1.10661300  | 0.80725000  | 0.26938200  |
| N | 1.87566600  | -0.19213200 | 0.68999500  |
| C | 3.10446300  | -0.62342600 | 0.01536900  |
| H | 3.70137600  | 0.23902700  | -0.29488000 |
| C | 1.67811800  | -0.87738000 | 1.98284600  |
| H | 0.64731000  | -1.21776800 | 2.07526000  |
| H | 1.90939700  | -0.17509300 | 2.79413000  |
| C | 2.67628900  | -2.02907100 | 1.91628800  |
| H | 2.22674000  | -2.87568600 | 1.38689900  |
| H | 2.98304600  | -2.36339100 | 2.90803500  |

|   |             |             |             |
|---|-------------|-------------|-------------|
| C | 3.82907600  | -1.43848800 | 1.10073300  |
| H | 4.42437400  | -0.76106700 | 1.71942000  |
| H | 4.49278700  | -2.18365900 | 0.66163200  |
| C | 1.47560500  | 1.51015800  | -1.01442600 |
| H | 2.41575800  | 2.06374900  | -0.87294000 |
| H | 1.62687500  | 0.78272000  | -1.81848500 |
| O | -0.82823300 | 2.22290500  | 0.47901600  |
| O | 0.43732000  | 2.35785400  | -1.44716200 |
| C | -0.15984300 | 3.11421600  | -0.40725900 |
| C | -1.23505400 | 3.95689100  | -1.05643800 |
| H | -1.80618800 | 4.47976900  | -0.28692900 |
| H | -1.90532100 | 3.30975800  | -1.62619800 |
| C | 0.86306600  | 3.95089600  | 0.35656900  |
| H | 1.53503800  | 3.33437300  | 0.95909100  |
| H | 0.33485700  | 4.62874400  | 1.02991100  |
| H | 1.45740000  | 4.53960400  | -0.34702500 |
| C | -1.06729300 | -0.53992500 | -0.05060100 |
| H | -1.30759600 | 0.10105200  | -0.91318500 |
| C | -2.22192100 | -0.82600700 | 0.91456500  |
| O | -0.27928300 | -1.53293000 | -0.17341600 |
| C | 2.88738200  | -1.46502100 | -1.26035000 |
| O | 1.67992800  | -1.82510500 | -1.60455700 |
| O | 3.87278500  | -1.75766700 | -1.91420100 |
| H | 0.86357400  | -1.60995100 | -0.96018100 |
| H | -0.77806300 | 4.68855900  | -1.72596200 |
| C | -3.02308800 | -2.04066900 | 0.43483500  |
| H | -3.83611900 | -2.21156400 | 1.14968400  |
| H | -1.81819600 | -1.02889500 | 1.90880100  |

|    |             |             |             |
|----|-------------|-------------|-------------|
| Cl | -3.32316100 | 0.59204800  | 1.11535300  |
| C  | -3.58482200 | -1.92662400 | -0.98150000 |
| H  | -2.75928300 | -1.82618300 | -1.69604100 |
| H  | -2.34716800 | -2.90112800 | 0.49344900  |
| H  | -4.19336400 | -1.01913900 | -1.06559200 |
| C  | -4.42681300 | -3.14794600 | -1.34652000 |
| H  | -3.83228100 | -4.06511500 | -1.28258200 |
| H  | -5.27786900 | -3.25180600 | -0.66553700 |
| H  | -4.81729900 | -3.07026600 | -2.36459800 |

(S)-TS3<sub>o</sub>-Cl-P

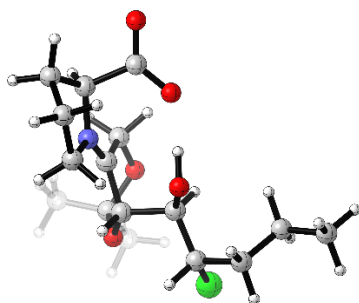

-----  
 - Thermochemistry -  
 -----

|                                              |                             |
|----------------------------------------------|-----------------------------|
| Zero-point correction=                       | 0.420174 (Hartree/Particle) |
| Thermal correction to Energy=                | 0.440065                    |
| Thermal correction to Enthalpy=              | 0.440930                    |
| Thermal correction to Gibbs Free Energy=     | 0.373427                    |
| Sum of electronic and zero-point Energies=   | -1515.601495                |
| Sum of electronic and thermal Energies=      | -1515.581603                |
| Sum of electronic and thermal Enthalpies=    | -1515.580738                |
| Sum of electronic and thermal Free Energies= | -1515.648241                |

Number of Imaginary Frequencies = 0

E (Single Point Energy) [IEFPCM<sub>(DCM)</sub>M06-2X/6-311++G(2d,2p)] = -1516.346594

|   |             |            |            |
|---|-------------|------------|------------|
| C | -0.24245700 | 0.77330400 | 0.86113700 |
| H | -0.10667900 | 0.55895500 | 1.92513100 |



|   |             |             |             |
|---|-------------|-------------|-------------|
| C | 1.07458200  | 0.75068100  | 0.13175600  |
| N | 2.09646000  | 0.11025900  | 0.56996400  |
| C | 3.26004900  | -0.21574800 | -0.27690900 |
| H | 3.55519200  | 0.65611100  | -0.86542000 |
| C | 2.22256300  | -0.53896700 | 1.91213400  |
| H | 1.32391500  | -1.11480800 | 2.12280000  |
| H | 2.34336400  | 0.26492800  | 2.64418500  |
| C | 3.48322400  | -1.39303200 | 1.78035900  |
| H | 3.22044000  | -2.39041600 | 1.41525800  |
| H | 3.98978700  | -1.49932300 | 2.74004300  |
| C | 4.31774100  | -0.65033400 | 0.73370500  |
| H | 4.80433500  | 0.22555600  | 1.17363500  |
| H | 5.07157300  | -1.27323700 | 0.25319900  |
| C | 1.07625300  | 1.40182300  | -1.22455700 |
| H | 1.94956200  | 2.05942900  | -1.33042200 |
| H | 1.13101900  | 0.62289300  | -1.99296100 |
| O | -0.90802600 | 2.01054900  | 0.76826500  |
| O | -0.13080200 | 2.10070600  | -1.41756300 |
| C | -0.53004900 | 2.88233300  | -0.30402600 |
| C | -1.77187700 | 3.63360700  | -0.72938200 |
| H | -2.21810400 | 4.12166100  | 0.13941100  |
| H | -2.49054200 | 2.93254000  | -1.15593700 |
| C | 0.57634600  | 3.81685300  | 0.18058100  |
| H | 1.40805400  | 3.27879800  | 0.64505300  |
| H | 0.15942400  | 4.48743800  | 0.93429300  |
| H | 0.95872100  | 4.41196100  | -0.65286700 |
| C | -1.05607700 | -0.42067300 | 0.24329200  |
| H | -1.20306900 | -0.23877600 | -0.83081100 |

|    |             |             |             |
|----|-------------|-------------|-------------|
| C  | -2.43046200 | -0.57904900 | 0.92206700  |
| O  | -0.33361400 | -1.60178700 | 0.47926900  |
| C  | 2.87259600  | -1.37550400 | -1.27684500 |
| O  | 1.66127800  | -1.71996900 | -1.32224200 |
| O  | 3.82898200  | -1.80829300 | -1.93087500 |
| H  | 0.38197900  | -1.70000300 | -0.19729000 |
| H  | -1.50831000 | 4.38999700  | -1.47191900 |
| C  | -3.01659800 | -1.97971200 | 0.76194900  |
| H  | -3.99408900 | -1.98939100 | 1.25824400  |
| H  | -2.35083600 | -0.33136200 | 1.98398000  |
| Cl | -3.60281500 | 0.63240900  | 0.24838000  |
| C  | -3.15987000 | -2.46383100 | -0.67983600 |
| H  | -2.17310800 | -2.48384000 | -1.15579100 |
| H  | -2.36386800 | -2.66482700 | 1.31268200  |
| H  | -3.77854200 | -1.75862300 | -1.24599300 |
| C  | -3.78387000 | -3.85719600 | -0.73901100 |
| H  | -3.16856100 | -4.58350400 | -0.19794200 |
| H  | -4.78046800 | -3.85809700 | -0.28506600 |
| H  | -3.88366300 | -4.20382800 | -1.77100800 |

(*R*)-TS3<sub>T</sub>-Cl-Pre

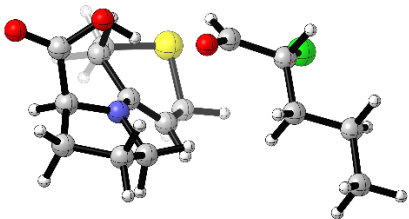

-----  
 - Thermochemistry -  
 -----

Zero-point correction=  
 Thermal correction to Energy=

0.381447 (Hartree/Particle)  
 0.400534

|                                              |              |
|----------------------------------------------|--------------|
| Thermal correction to Enthalpy=              | 0.401399     |
| Thermal correction to Gibbs Free Energy=     | 0.335088     |
| Sum of electronic and zero-point Energies=   | -1724.101463 |
| Sum of electronic and thermal Energies=      | -1724.082376 |
| Sum of electronic and thermal Enthalpies=    | -1724.081511 |
| Sum of electronic and thermal Free Energies= | -1724.147822 |

Number of Imaginary Frequencies = 0

E (Single Point Energy) [IEFPCM<sub>(DCM)</sub>M06-2X/6-311++G(2d,2p)] = -1724.784650

|   |             |             |             |
|---|-------------|-------------|-------------|
| C | 0.09881400  | 0.95207300  | -1.45101900 |
| H | 0.54963300  | 0.12747500  | -1.99553000 |
| C | -1.06036100 | 0.74551700  | -0.78743600 |
| N | -1.60614800 | -0.53177700 | -0.65180300 |
| C | -3.03794200 | -0.75838600 | -0.46432200 |
| H | -3.66100400 | -0.03883500 | -1.00422100 |
| C | -0.96752400 | -1.68203300 | -1.29035400 |
| H | -0.91553000 | -1.54949300 | -2.38291100 |
| H | 0.04998000  | -1.80184600 | -0.90768200 |
| C | -1.89011300 | -2.83687300 | -0.92131300 |
| H | -1.77966800 | -3.69223900 | -1.58995200 |
| H | -1.68312000 | -3.16785200 | 0.10231200  |
| C | -3.27166700 | -2.18568000 | -1.01442800 |
| H | -3.57930200 | -2.10918300 | -2.06094500 |
| H | -4.05462000 | -2.71361200 | -0.46682200 |
| C | -1.79541700 | 1.83440900  | -0.03263000 |
| H | -2.87082900 | 1.76034700  | -0.22999400 |
| H | -1.66524700 | 1.66723700  | 1.04574000  |
| C | 1.05323100  | -0.06476500 | 1.44039600  |
| H | 0.77128400  | 0.99850200  | 1.52996000  |
| C | 2.52081300  | -0.37953400 | 1.19814200  |
| O | 0.24681600  | -0.96121200 | 1.57675000  |

|    |             |             |             |
|----|-------------|-------------|-------------|
| C  | -3.46747500 | -0.68585500 | 1.00310600  |
| O  | -2.51546300 | -0.80116400 | 1.92351900  |
| O  | -4.63261100 | -0.57171100 | 1.31734500  |
| H  | -1.61758400 | -0.83961800 | 1.52317900  |
| C  | 2.73396900  | -1.43766400 | 0.12237900  |
| H  | 2.40632000  | -1.03122800 | -0.84306000 |
| C  | 4.17203000  | -1.94056800 | 0.02573200  |
| H  | 2.06543800  | -2.27103400 | 0.37242400  |
| C  | 4.31153600  | -3.03911700 | -1.02602600 |
| H  | 5.34368700  | -3.39219900 | -1.09309600 |
| H  | 3.67611300  | -3.89686600 | -0.78329000 |
| H  | 4.01663700  | -2.67146000 | -2.01419300 |
| H  | 4.48559400  | -2.31980700 | 1.00612200  |
| H  | 4.83699500  | -1.10558300 | -0.21950100 |
| H  | 2.93320700  | -0.72335000 | 2.15369000  |
| C  | -1.35770800 | 3.24936100  | -0.38733900 |
| C  | 0.84381700  | 2.25617900  | -1.56274700 |
| H  | -1.66132600 | 3.50748600  | -1.40682800 |
| H  | -1.81590000 | 3.96767800  | 0.29483700  |
| H  | 1.91962900  | 2.07654600  | -1.48639000 |
| H  | 0.66292600  | 2.73382300  | -2.53333600 |
| S  | 0.44133600  | 3.44585800  | -0.24879500 |
| Cl | 3.39190600  | 1.15200700  | 0.81641600  |

(R)-TS3<sub>T</sub>-Cl

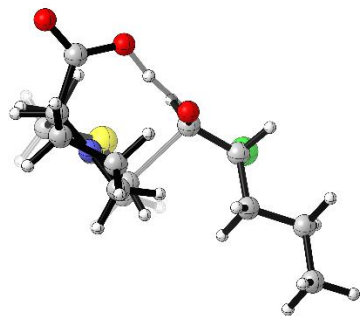

-----  
- Thermochemistry -  
-----

|                                              |                             |
|----------------------------------------------|-----------------------------|
| Zero-point correction=                       | 0.381605 (Hartree/Particle) |
| Thermal correction to Energy=                | 0.399723                    |
| Thermal correction to Enthalpy=              | 0.400588                    |
| Thermal correction to Gibbs Free Energy=     | 0.336882                    |
| Sum of electronic and zero-point Energies=   | -1724.088101                |
| Sum of electronic and thermal Energies=      | -1724.069983                |
| Sum of electronic and thermal Enthalpies=    | -1724.069118                |
| Sum of electronic and thermal Free Energies= | -1724.132824                |

Number of Imaginary Frequencies = 1

E (Single Point Energy) [IEFPCM(DCM)M06-2X/6-311++G(2d,2p)] = -1724.769951

|   |             |             |             |
|---|-------------|-------------|-------------|
| C | -0.37664700 | 0.61019700  | 1.03803500  |
| H | -0.74792700 | -0.27619500 | 1.54239300  |
| C | 1.00017000  | 0.64904300  | 0.80228500  |
| N | 1.71633400  | -0.48396200 | 0.79614000  |
| C | 3.12172700  | -0.58204700 | 0.38547300  |
| H | 3.73481300  | 0.17624300  | 0.87602800  |
| C | 1.20793100  | -1.77648300 | 1.30412500  |
| H | 1.17254000  | -1.73704100 | 2.40054100  |
| H | 0.21256400  | -1.97595200 | 0.91428400  |
| C | 2.23522700  | -2.78202800 | 0.79869100  |
| H | 2.26052200  | -3.68576600 | 1.40920100  |
| H | 1.99432300  | -3.06447300 | -0.23162900 |

|   |             |             |             |
|---|-------------|-------------|-------------|
| C | 3.54149400  | -1.99032800 | 0.84865100  |
| H | 3.90904800  | -1.92948800 | 1.87686600  |
| H | 4.33621800  | -2.39821700 | 0.22253600  |
| C | 1.69333700  | 1.90600800  | 0.32267600  |
| H | 2.73448900  | 1.90284600  | 0.65547000  |
| H | 1.71437500  | 1.88267800  | -0.77659800 |
| C | -0.76509400 | -0.03804100 | -1.01277500 |
| H | -0.55601300 | 0.97283800  | -1.39035800 |
| C | -2.24762100 | -0.42754300 | -1.00519500 |
| O | 0.02731300  | -0.99298800 | -1.26383400 |
| C | 3.35660300  | -0.40897900 | -1.12517400 |
| O | 2.34538400  | -0.51785700 | -1.95041700 |
| O | 4.49290100  | -0.20040900 | -1.51121300 |
| H | 1.38339500  | -0.71036500 | -1.56620700 |
| C | -2.72005800 | -1.33064800 | 0.12285900  |
| H | -2.80671400 | -0.75241100 | 1.05032500  |
| C | -4.04367100 | -2.03437300 | -0.17114900 |
| H | -1.93323900 | -2.08285100 | 0.27113100  |
| C | -4.46687200 | -2.94676100 | 0.97796400  |
| H | -5.41285500 | -3.44767000 | 0.75695200  |
| H | -3.71230000 | -3.71800300 | 1.16383900  |
| H | -4.59713900 | -2.37463000 | 1.90230700  |
| H | -3.94170400 | -2.61885000 | -1.09356100 |
| H | -4.82105500 | -1.28434700 | -0.35472600 |
| H | -2.37940300 | -0.94998200 | -1.95874500 |
| C | 1.05250400  | 3.20890900  | 0.79211900  |
| C | -1.17783000 | 1.85223300  | 1.35970700  |
| H | 1.16426700  | 3.32717500  | 1.87438700  |

|    |             |            |             |
|----|-------------|------------|-------------|
| H  | 1.54641600  | 4.05321300 | 0.30830100  |
| H  | -2.23938700 | 1.67978700 | 1.17711000  |
| H  | -1.07086100 | 2.11352300 | 2.41945500  |
| S  | -0.70911800 | 3.30000900 | 0.36907900  |
| Cl | -3.29440000 | 1.04238800 | -1.16197600 |

(R)-TS3<sub>T</sub>-Cl-P

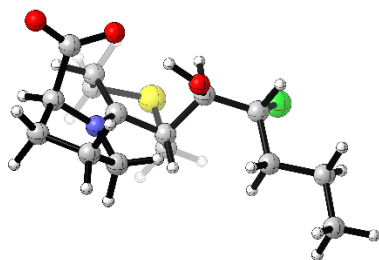

-----  
 - Thermochemistry -  
 -----

|                                              |                             |
|----------------------------------------------|-----------------------------|
| Zero-point correction=                       | 0.386030 (Hartree/Particle) |
| Thermal correction to Energy=                | 0.404208                    |
| Thermal correction to Enthalpy=              | 0.405073                    |
| Thermal correction to Gibbs Free Energy=     | 0.341118                    |
| Sum of electronic and zero-point Energies=   | -1724.116573                |
| Sum of electronic and thermal Energies=      | -1724.098395                |
| Sum of electronic and thermal Enthalpies=    | -1724.097530                |
| Sum of electronic and thermal Free Energies= | -1724.161485                |

Number of Imaginary Frequencies = 0

E (Single Point Energy) [IEFPCM(DCM)M06-2X/6-311++G(2d,2p)] = -1724.802661

|   |             |             |             |
|---|-------------|-------------|-------------|
| C | 0.42489400  | 0.40460100  | -0.63807900 |
| H | 0.61700300  | -0.48138200 | -1.24651300 |
| C | -1.06507600 | 0.61106500  | -0.52660000 |
| N | -1.87415700 | -0.36933500 | -0.75152500 |
| C | -3.30992800 | -0.35934100 | -0.38577100 |
| H | -3.79498700 | 0.53860200  | -0.76794000 |

|   |             |             |             |
|---|-------------|-------------|-------------|
| C | -1.47202100 | -1.73547200 | -1.21377800 |
| H | -1.27900900 | -1.67083300 | -2.28868400 |
| H | -0.57679700 | -2.05213600 | -0.68375800 |
| C | -2.68833900 | -2.60241600 | -0.90120600 |
| H | -2.75169700 | -3.45399100 | -1.57955800 |
| H | -2.62101300 | -2.97893600 | 0.12407400  |
| C | -3.85807000 | -1.62896200 | -1.03422700 |
| H | -4.08933200 | -1.44495700 | -2.08799100 |
| H | -4.76479400 | -1.95547200 | -0.52512200 |
| C | -1.56564400 | 1.92854100  | -0.00054900 |
| H | -2.65091500 | 1.99301500  | -0.06465600 |
| H | -1.31310800 | 1.95251300  | 1.06702200  |
| C | 0.91129600  | 0.08863200  | 0.81769400  |
| H | 0.79051600  | 0.98550700  | 1.43814700  |
| C | 2.37876700  | -0.36434700 | 0.91383000  |
| O | 0.17713100  | -0.99608100 | 1.33821700  |
| C | -3.45594300 | -0.37872200 | 1.18010000  |
| O | -2.39866400 | -0.35459900 | 1.86519500  |
| O | -4.63153400 | -0.40792600 | 1.57147200  |
| H | -0.74844700 | -0.73224200 | 1.56809500  |
| C | 2.80492700  | -1.38960400 | -0.12492800 |
| H | 2.85781000  | -0.92323600 | -1.11752900 |
| C | 4.13339100  | -2.07466300 | 0.19087800  |
| H | 2.00826400  | -2.14619400 | -0.15998400 |
| C | 4.48663500  | -3.13547400 | -0.84928900 |
| H | 5.43865000  | -3.61806600 | -0.61378100 |
| H | 3.71675900  | -3.91266800 | -0.89367700 |
| H | 4.57287900  | -2.69070000 | -1.84609000 |



|    |             |             |             |
|----|-------------|-------------|-------------|
| H  | 4.07048000  | -2.53367700 | 1.18501900  |
| H  | 4.92857800  | -1.32282700 | 0.23840400  |
| H  | 2.48481500  | -0.78545200 | 1.91587500  |
| C  | -0.94876800 | 3.14663800  | -0.69818800 |
| C  | 1.12067300  | 1.57976100  | -1.34331800 |
| H  | -1.22577300 | 3.17400000  | -1.75641800 |
| H  | -1.33203700 | 4.05265700  | -0.22627000 |
| H  | 2.19643600  | 1.40916000  | -1.38101100 |
| H  | 0.75974700  | 1.64162200  | -2.37496700 |
| S  | 0.85726600  | 3.18572200  | -0.54320000 |
| Cl | 3.50309200  | 1.06452500  | 0.91239400  |

(S)-TS3<sub>T</sub>-Cl-Pre

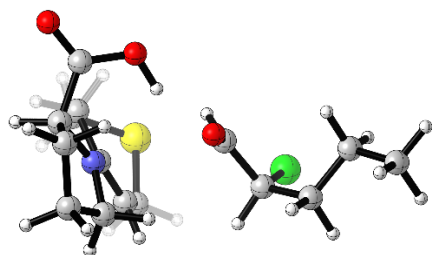

-----  
- Thermochemistry -  
-----

|                                              |                             |
|----------------------------------------------|-----------------------------|
| Zero-point correction=                       | 0.381616 (Hartree/Particle) |
| Thermal correction to Energy=                | 0.401423                    |
| Thermal correction to Enthalpy=              | 0.402288                    |
| Thermal correction to Gibbs Free Energy=     | 0.333162                    |
| Sum of electronic and zero-point Energies=   | -1724.097998                |
| Sum of electronic and thermal Energies=      | -1724.078191                |
| Sum of electronic and thermal Enthalpies=    | -1724.077326                |
| Sum of electronic and thermal Free Energies= | -1724.146451                |

Number of Imaginary Frequencies = 0

E (Single Point Energy) [IEFPCM<sub>(DCM)</sub>M06-2X/6-311++G(2d,2p)] = -1724.781967

|   |            |            |            |
|---|------------|------------|------------|
| C | 0.49180400 | 1.34244300 | 1.40228400 |
|---|------------|------------|------------|

|   |             |             |             |
|---|-------------|-------------|-------------|
| H | 0.11309100  | 0.75779600  | 2.23521800  |
| C | 1.43503200  | 0.80130800  | 0.59439300  |
| N | 1.85226200  | -0.51475700 | 0.75248200  |
| C | 2.96648400  | -1.11138000 | 0.02851000  |
| H | 3.91574800  | -0.58211600 | 0.18471300  |
| C | 1.53871500  | -1.25365200 | 1.98154900  |
| H | 0.53161800  | -1.68659500 | 1.91818200  |
| H | 1.56708100  | -0.57928100 | 2.84433400  |
| C | 2.63246300  | -2.32008700 | 2.07144700  |
| H | 2.28509800  | -3.23600700 | 2.55251500  |
| H | 3.48136600  | -1.93199600 | 2.64251300  |
| C | 3.04180800  | -2.53446600 | 0.61592800  |
| H | 4.03545100  | -2.96653900 | 0.49056200  |
| H | 2.31402600  | -3.17908200 | 0.11007900  |
| C | 2.04754100  | 1.54367700  | -0.57642800 |
| H | 3.13048400  | 1.37053400  | -0.58322900 |
| H | 1.65507100  | 1.13485900  | -1.51657000 |
| C | -1.30965100 | -0.25199900 | -0.40671700 |
| H | -0.96647900 | 0.58011800  | -1.04471600 |
| C | -2.52339700 | 0.00341500  | 0.47391800  |
| O | -0.75612600 | -1.33373600 | -0.40559400 |
| C | 2.76177900  | -1.21784000 | -1.47885200 |
| O | 1.52089800  | -1.42487800 | -1.91179600 |
| O | 3.69365100  | -1.18373800 | -2.25229300 |
| H | 0.84284900  | -1.40114300 | -1.19561200 |
| C | -3.43297300 | -1.21277300 | 0.61170900  |
| H | -4.21605100 | -0.97435900 | 1.33906100  |
| H | -2.15145400 | 0.30581000  | 1.45739700  |

|    |             |             |             |
|----|-------------|-------------|-------------|
| C  | -4.05642900 | -1.70161200 | -0.69470700 |
| H  | -3.26484600 | -1.92281100 | -1.42024300 |
| H  | -2.81595300 | -2.00769000 | 1.04815800  |
| H  | -4.67196700 | -0.90505100 | -1.12593100 |
| C  | -4.90964200 | -2.94860500 | -0.47068100 |
| H  | -4.30635100 | -3.76809600 | -0.06713700 |
| H  | -5.36097500 | -3.29069000 | -1.40545600 |
| H  | -5.71789400 | -2.74501200 | 0.23920900  |
| C  | 1.81195400  | 3.04801200  | -0.55417800 |
| C  | -0.11342300 | 2.71597700  | 1.28028100  |
| H  | 2.35911600  | 3.51863800  | 0.26866300  |
| H  | 2.15317300  | 3.49557500  | -1.48923300 |
| H  | -1.18885700 | 2.66972900  | 1.48269400  |
| H  | 0.31585000  | 3.41328600  | 2.00998200  |
| S  | 0.04841400  | 3.44224900  | -0.37822000 |
| Cl | -3.39643800 | 1.44598500  | -0.17084000 |

(S)-TS3<sub>T</sub>-Cl

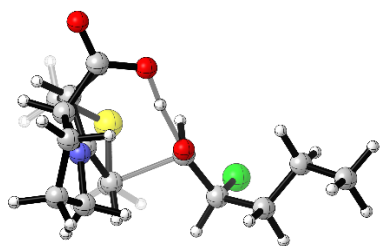

-----  
 - Thermochemistry -  
 -----

|                                            |                             |
|--------------------------------------------|-----------------------------|
| Zero-point correction=                     | 0.381745 (Hartree/Particle) |
| Thermal correction to Energy=              | 0.399805                    |
| Thermal correction to Enthalpy=            | 0.400670                    |
| Thermal correction to Gibbs Free Energy=   | 0.336822                    |
| Sum of electronic and zero-point Energies= | -1724.087754                |
| Sum of electronic and thermal Energies=    | -1724.069694                |

Sum of electronic and thermal Enthalpies= -1724.068829  
Sum of electronic and thermal Free Energies= -1724.132677

Number of Imaginary Frequencies = 1

E (Single Point Energy) [IEFPCM(DCM)M06-2X/6-311++G(2d,2p)] = -1724.769924

|   |             |             |             |
|---|-------------|-------------|-------------|
| C | -0.05294200 | 1.17320000  | -1.15617600 |
| H | 0.13286400  | 0.61537900  | -2.07035500 |
| C | -1.25252400 | 0.89309300  | -0.49664200 |
| N | -1.91703400 | -0.23371900 | -0.77783100 |
| C | -2.98838100 | -0.80306800 | 0.05033700  |
| H | -3.87371200 | -0.15871500 | 0.03907700  |
| C | -1.73233700 | -0.99569900 | -2.03286400 |
| H | -0.82507500 | -1.60262900 | -1.96898200 |
| H | -1.64144100 | -0.29731600 | -2.86844800 |
| C | -2.99208700 | -1.85428700 | -2.10842500 |
| H | -2.83593400 | -2.75945600 | -2.69705900 |
| H | -3.81088300 | -1.28327600 | -2.55686300 |
| C | -3.29377300 | -2.14560900 | -0.63947500 |
| H | -4.31925500 | -2.46325100 | -0.44889100 |
| H | -2.61205300 | -2.91557600 | -0.26144500 |
| C | -1.72565900 | 1.70838500  | 0.68562200  |
| H | -2.81536300 | 1.63635200  | 0.76163500  |
| H | -1.31123300 | 1.26959400  | 1.60364100  |
| C | 1.05660400  | -0.16419900 | 0.09362600  |
| H | 1.01799400  | 0.52246600  | 0.95207700  |
| C | 2.39663000  | -0.16524000 | -0.66973200 |
| O | 0.42521800  | -1.26238300 | 0.13906100  |
| C | -2.62040300 | -1.04564300 | 1.51720000  |
| O | -1.37659100 | -1.33497500 | 1.80821300  |

|    |             |             |             |
|----|-------------|-------------|-------------|
| O  | -3.50323300 | -1.02533400 | 2.35624900  |
| H  | -0.65193200 | -1.30410700 | 1.03201400  |
| C  | 3.07919700  | -1.53107200 | -0.63935400 |
| H  | 3.97257000  | -1.47477400 | -1.27185200 |
| H  | 2.26798100  | 0.14650400  | -1.70706300 |
| C  | 3.45352200  | -2.05514000 | 0.74586100  |
| H  | 2.56169300  | -2.07682500 | 1.38144700  |
| H  | 2.38261400  | -2.22851800 | -1.11939900 |
| H  | 4.16805000  | -1.37046600 | 1.21504400  |
| C  | 4.06180900  | -3.45421200 | 0.66258900  |
| H  | 3.35089400  | -4.16422900 | 0.22755000  |
| H  | 4.34291800  | -3.82316100 | 1.65247200  |
| H  | 4.96014600  | -3.45306200 | 0.03619400  |
| C  | -1.33569500 | 3.18232200  | 0.61573600  |
| C  | 0.58547600  | 2.54280000  | -1.15000600 |
| H  | -1.83726600 | 3.68011800  | -0.21973400 |
| H  | -1.63384200 | 3.68520800  | 1.53722900  |
| H  | 1.65148500  | 2.46830700  | -1.37740900 |
| H  | 0.13807000  | 3.17867500  | -1.92284000 |
| S  | 0.45868200  | 3.39989500  | 0.44651200  |
| Cl | 3.47654500  | 1.09871900  | 0.06203600  |

(S)-TS3<sub>T</sub>-Cl-P

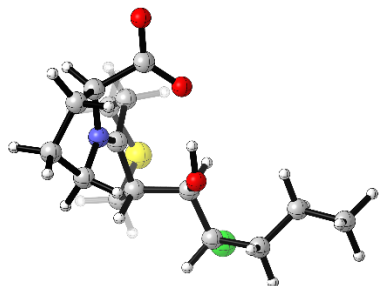

-----  
- Thermochemistry -  
-----

|                                              |                             |
|----------------------------------------------|-----------------------------|
| Zero-point correction=                       | 0.386059 (Hartree/Particle) |
| Thermal correction to Energy=                | 0.404121                    |
| Thermal correction to Enthalpy=              | 0.404986                    |
| Thermal correction to Gibbs Free Energy=     | 0.341308                    |
| Sum of electronic and zero-point Energies=   | -1724.113543                |
| Sum of electronic and thermal Energies=      | -1724.095482                |
| Sum of electronic and thermal Enthalpies=    | -1724.094617                |
| Sum of electronic and thermal Free Energies= | -1724.158295                |

Number of Imaginary Frequencies = 0

E (Single Point Energy) [IEFPCM(DCM)M06-2X/6-311++G(2d,2p)] = -1724.799615

|   |             |             |             |
|---|-------------|-------------|-------------|
| C | -0.19148300 | 0.91422600  | 0.89448100  |
| H | -0.07222800 | 0.58467900  | 1.92965100  |
| C | 1.13140800  | 0.82074800  | 0.17707000  |
| N | 2.08832000  | 0.10507100  | 0.66590300  |
| C | 3.24383800  | -0.37707900 | -0.13798600 |
| H | 3.87063800  | 0.47400800  | -0.41343900 |
| C | 2.12354900  | -0.48242000 | 2.03469000  |
| H | 1.47708100  | -1.36477500 | 2.03834500  |
| H | 1.76170700  | 0.24742900  | 2.75754600  |
| C | 3.59383000  | -0.83999400 | 2.20777700  |
| H | 3.73203300  | -1.59560000 | 2.98217400  |
| H | 4.16630600  | 0.05130100  | 2.48217500  |

|   |             |             |             |
|---|-------------|-------------|-------------|
| C | 3.98641000  | -1.32846100 | 0.81506800  |
| H | 5.05985500  | -1.30864300 | 0.62839400  |
| H | 3.62892000  | -2.35220800 | 0.66259900  |
| C | 1.25986400  | 1.45421800  | -1.18079400 |
| H | 2.28972300  | 1.40147900  | -1.53666100 |
| H | 0.64887900  | 0.86930700  | -1.87825300 |
| C | -1.08986100 | -0.18554700 | 0.21792200  |
| H | -1.27856600 | 0.08169300  | -0.83081500 |
| C | -2.44553300 | -0.35798000 | 0.93322000  |
| O | -0.42430100 | -1.41967900 | 0.32149000  |
| C | 2.77786300  | -1.13284400 | -1.41861800 |
| O | 1.57748900  | -1.51813500 | -1.46141400 |
| O | 3.67653100  | -1.31460900 | -2.25357500 |
| H | 0.30119300  | -1.48353300 | -0.35168500 |
| C | -3.09207000 | -1.71849100 | 0.68686500  |
| H | -4.04976400 | -1.73255100 | 1.22036800  |
| H | -2.32591300 | -0.19592400 | 2.00822800  |
| C | -3.30824800 | -2.07885600 | -0.78184400 |
| H | -2.34095000 | -2.09596000 | -1.29587400 |
| H | -2.44582100 | -2.46799900 | 1.15460700  |
| H | -3.91955600 | -1.30851100 | -1.26510100 |
| C | -3.98918500 | -3.43901500 | -0.92555100 |
| H | -3.38382000 | -4.22875400 | -0.46870500 |
| H | -4.14076200 | -3.69748200 | -1.97689900 |
| H | -4.96766000 | -3.43970700 | -0.43373200 |
| C | 0.80002800  | 2.91799400  | -1.19614800 |
| C | -0.72734500 | 2.35229000  | 0.93089000  |
| H | 1.42860200  | 3.53262000  | -0.54451100 |

|    |             |            |             |
|----|-------------|------------|-------------|
| H  | 0.89118500  | 3.30321800 | -2.21281600 |
| H  | -1.69378900 | 2.38342300 | 1.43219100  |
| H  | -0.03655100 | 2.97401700 | 1.50954600  |
| S  | -0.93774000 | 3.09747200 | -0.70986100 |
| Cl | -3.60536900 | 0.94000400 | 0.39440400  |



**Supplementary Table 11.** Energies for enamine addition to 2-fluoropentanal. Reported energies for structures optimized at the IEFPCM<sub>(DCM)</sub>M06-2X/6-311++G(2d,2p)//IEFPCM<sub>(DCM)</sub>M06-2X/6-31+G(d,p) level of theory represent the sum of the thermal correction to Gibbs Free Energy computed at the IEFPCM<sub>(DCM)</sub>M06-2X/6-31+G(d,p) level of theory and single point energies computed at the IEFPCM<sub>(DCM)</sub>M06-2X/6-311++G(2d,2p). All energies are reported in Hartrees.

| Structure                                 | Single Point Energies, E<br>IEFPCM <sub>(DCM)</sub> M06-2X/6-311++G(2d,2p) | Thermal Corrections to Gibbs Free Energies,<br>IEFPCM <sub>(DCM)</sub> M06-2X/6-31+G(d,p) | Gibbs Free Energies (G),<br>IEFPCM <sub>(DCM)</sub> M06-2X/6-31+G(d,p) | Gibbs Free Energies (G),<br>IEFPCM <sub>(DCM)</sub> M06-2X/6-311++G(2d,2p)//<br>IEFPCM <sub>(DCM)</sub> M06-2X/6-31+G(d,p) |
|-------------------------------------------|----------------------------------------------------------------------------|-------------------------------------------------------------------------------------------|------------------------------------------------------------------------|----------------------------------------------------------------------------------------------------------------------------|
| 2-Fluoropentanal                          | -731.33393130                                                              | 0.102879                                                                                  | -370.761392                                                            | -731.2310523                                                                                                               |
| Enamine of Cyclohexanone (G)              | -634.55147535                                                              | 0.238392                                                                                  | -634.142903                                                            | -634.3130834                                                                                                               |
| Enamine of Dioxane (O)                    | -784.98483791                                                              | 0.244077                                                                                  | -784.522619                                                            | -784.7407609                                                                                                               |
| Enamine of Tetrahydro-4H-thiopyranone (T) | -993.43210840                                                              | 0.210205                                                                                  | -993.028735                                                            | -993.2219034                                                                                                               |
| Enamine of Tetrahydro-4H-pyranone (P)     | -670.45469021                                                              | 0.214793                                                                                  | -670.055312                                                            | -670.2398972                                                                                                               |
| ( <i>R</i> )-TS3 <sub>P</sub> -F-Pre      | -1041.446106                                                               | 0.339911                                                                                  | -1040.814983                                                           | -1041.106195                                                                                                               |
| ( <i>R</i> )-TS3 <sub>P</sub> -F          | -1041.435017                                                               | 0.343573                                                                                  | -1040.80187                                                            | -1041.091444                                                                                                               |
| ( <i>R</i> )-TS3 <sub>P</sub> -F-P        | -1041.467264                                                               | 0.347343                                                                                  | -1040.830554                                                           | -1041.119921                                                                                                               |
| ( <i>S</i> )-TS3 <sub>P</sub> -F-Pre      | -1041.445581                                                               | 0.338545                                                                                  | -1040.815817                                                           | -1041.107036                                                                                                               |
| ( <i>S</i> )-TS3 <sub>P</sub> -F          | -1041.43582                                                                | 0.342145                                                                                  | -1040.804044                                                           | -1041.093675                                                                                                               |
| ( <i>S</i> )-TS3 <sub>P</sub> -F-P        | -1041.466319                                                               | 0.346494                                                                                  | -1040.83068                                                            | -1041.119825                                                                                                               |
| ( <i>R</i> )-TS3 <sub>G</sub> -F-Pre      | -1005.539197                                                               | 0.362756                                                                                  | -1004.899267                                                           | -1005.176441                                                                                                               |
| ( <i>R</i> )-TS3 <sub>G</sub> -F          | -1005.531517                                                               | 0.367347                                                                                  | -1004.888828                                                           | -1005.16417                                                                                                                |
| ( <i>R</i> )-TS3 <sub>G</sub> -F-P        | -1005.55939                                                                | 0.370408                                                                                  | -1004.914209                                                           | -1005.188982                                                                                                               |
| ( <i>S</i> )-TS3 <sub>G</sub> -F-Pre      | -1005.542809                                                               | 0.363097                                                                                  | -1004.902711                                                           | -1005.179712                                                                                                               |
| ( <i>S</i> )-TS3 <sub>G</sub> -F          | -1005.532406                                                               | 0.366469                                                                                  | -1004.890519                                                           | -1005.165937                                                                                                               |
| ( <i>S</i> )-TS3 <sub>G</sub> -F-P        | -1005.560329                                                               | 0.369905                                                                                  | -1004.915721                                                           | -1005.190424                                                                                                               |
| ( <i>R</i> )-TS3 <sub>O</sub> -F-Pre      | -1155.975514                                                               | 0.367878                                                                                  | -1155.283126                                                           | -1155.607636                                                                                                               |
| ( <i>R</i> )-TS3 <sub>O</sub> -F          | -1155.960428                                                               | 0.370379                                                                                  | -1155.266603                                                           | -1155.590049                                                                                                               |

|                                              |              |          |              |              |
|----------------------------------------------|--------------|----------|--------------|--------------|
| ( <i>R</i> )- <b>TS3</b> <sub>O</sub> -F-P   | -1155.989945 | 0.375586 | -1155.291196 | -1155.614359 |
| ( <i>S</i> )- <b>TS3</b> <sub>O</sub> -F-Pre | -1155.97491  | 0.368238 | -1155.282047 | -1155.606672 |
| ( <i>S</i> )- <b>TS3</b> <sub>O</sub> -F     | -1155.961139 | 0.370957 | -1155.266948 | -1155.590182 |
| ( <i>S</i> )- <b>TS3</b> <sub>O</sub> -F-P   | -1155.988743 | 0.375469 | -1155.290286 | -1155.613274 |
| ( <i>R</i> )- <b>TS3</b> <sub>T</sub> -F-Pre | -1005.539197 | 0.362756 | -1004.899267 | -1005.176441 |
| ( <i>R</i> )- <b>TS3</b> <sub>T</sub> -F     | -1005.531517 | 0.367347 | -1004.888828 | -1005.16417  |
| ( <i>R</i> )- <b>TS3</b> <sub>T</sub> -F-P   | -1005.55939  | 0.370408 | -1004.914209 | -1005.188982 |
| ( <i>S</i> )- <b>TS3</b> <sub>T</sub> -F-Pre | -1005.542809 | 0.363097 | -1004.902711 | -1005.179712 |
| ( <i>S</i> )- <b>TS3</b> <sub>T</sub> -F     | -1005.532406 | 0.366469 | -1004.890519 | -1005.165937 |
| ( <i>S</i> )- <b>TS3</b> <sub>T</sub> -F-P   | -1005.560329 | 0.369905 | -1004.915721 | -1005.190424 |

(*R*)-**TS3**<sub>p</sub>-F-Pre

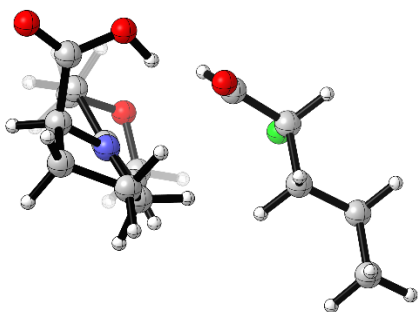

-----  
 - Thermochemistry -  
 -----

|                                              |                             |
|----------------------------------------------|-----------------------------|
| Zero-point correction=                       | 0.386791 (Hartree/Particle) |
| Thermal correction to Energy=                | 0.405843                    |
| Thermal correction to Enthalpy=              | 0.406708                    |
| Thermal correction to Gibbs Free Energy=     | 0.339911                    |
| Sum of electronic and zero-point Energies=   | -1040.768103                |
| Sum of electronic and thermal Energies=      | -1040.749052                |
| Sum of electronic and thermal Enthalpies=    | -1040.748187                |
| Sum of electronic and thermal Free Energies= | -1040.814983                |

Number of Imaginary Frequencies = 0

E (Single Point Energy) [IEFPCM<sub>(DCM)</sub>M06-2X/6-311++G(2d,2p)] = -1041.446106

|   |             |             |             |
|---|-------------|-------------|-------------|
| C | 0.31308500  | 1.12236100  | -1.39452200 |
| H | 0.83281400  | 0.35115900  | -1.95386300 |
| C | -0.86093700 | 0.86959000  | -0.77944900 |
| N | -1.39572900 | -0.40784800 | -0.66351500 |
| C | -2.82855300 | -0.64772400 | -0.51611600 |
| H | -3.44098000 | 0.08196700  | -1.05504800 |
| C | -0.72084800 | -1.54700500 | -1.28371100 |
| H | -0.62032600 | -1.40166600 | -2.37103900 |
| H | 0.28028600  | -1.66165300 | -0.85603300 |
| C | -1.65375300 | -2.71073100 | -0.96899400 |
| H | -1.51404800 | -3.55551000 | -1.64551000 |
| H | -1.48719200 | -3.05705800 | 0.05686200  |
| C | -3.03413600 | -2.06293700 | -1.10566800 |
| H | -3.29812000 | -1.96511600 | -2.16235000 |
| H | -3.83641500 | -2.60486600 | -0.60176700 |
| C | -1.58831600 | 1.97455900  | -0.04839300 |
| H | -2.65523200 | 1.97450900  | -0.29765600 |
| H | -1.51669000 | 1.80810400  | 1.03573000  |
| C | 1.16022100  | 0.30722000  | 1.47244800  |
| H | 0.81889800  | 1.35798200  | 1.47476000  |
| C | 2.64674800  | 0.10025200  | 1.27326600  |
| O | 0.40641100  | -0.62496300 | 1.66925700  |
| C | -3.29865900 | -0.60915000 | 0.94096000  |
| O | -2.37021800 | -0.67500700 | 1.88929100  |
| O | -4.47708200 | -0.55934000 | 1.22115900  |
| H | -1.45807500 | -0.66394600 | 1.52091600  |
| C | 2.98736900  | -0.97307400 | 0.25763700  |
| H | 2.61582400  | -0.64961100 | -0.72295800 |

|   |             |             |             |
|---|-------------|-------------|-------------|
| C | 4.48421200  | -1.26951700 | 0.18654200  |
| H | 2.43102400  | -1.87587300 | 0.53768600  |
| C | 4.79926600  | -2.34289000 | -0.85284800 |
| H | 5.87158000  | -2.55037400 | -0.89486900 |
| H | 4.28306800  | -3.27887600 | -0.61592500 |
| H | 4.47827300  | -2.02575600 | -1.85033200 |
| H | 4.83285400  | -1.59383100 | 1.17462200  |
| H | 5.02498300  | -0.34785100 | -0.05416200 |
| H | 3.08379600  | -0.13617300 | 2.25341500  |
| C | -0.99590200 | 3.33192100  | -0.40957100 |
| C | 0.97043800  | 2.47763600  | -1.33369000 |
| H | -1.29122200 | 3.61588400  | -1.43088400 |
| H | -1.34245700 | 4.10371600  | 0.27985700  |
| H | 2.03302100  | 2.37442200  | -1.09505100 |
| H | 0.89269700  | 2.99879700  | -2.30247000 |
| F | 3.18452500  | 1.32659100  | 0.87592600  |
| O | 0.41708800  | 3.29608300  | -0.31595700 |

*(R)*-TS3<sub>p</sub>-F

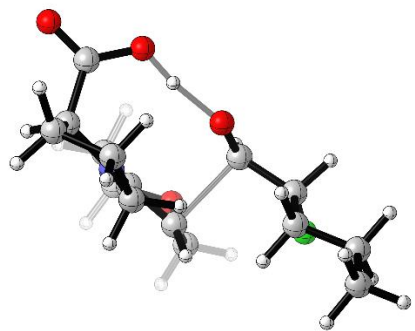

-----  
 - Thermochemistry -  
 -----

Zero-point correction=  
 Thermal correction to Energy=

0.386933 (Hartree/Particle)  
 0.404278

|                                              |              |
|----------------------------------------------|--------------|
| Thermal correction to Enthalpy=              | 0.405143     |
| Thermal correction to Gibbs Free Energy=     | 0.343573     |
| Sum of electronic and zero-point Energies=   | -1040.758510 |
| Sum of electronic and thermal Energies=      | -1040.741164 |
| Sum of electronic and thermal Enthalpies=    | -1040.740299 |
| Sum of electronic and thermal Free Energies= | -1040.801870 |

Number of Imaginary Frequencies = 1

E (Single Point Energy) [IEFPCM(DCM)M06-2X/6-311++G(2d,2p)] = -1041.435017

|   |             |             |             |
|---|-------------|-------------|-------------|
| C | -0.39683700 | 1.23415800  | 0.90330700  |
| H | -1.05449900 | 0.60321600  | 1.49328300  |
| C | 0.92546100  | 0.84070500  | 0.72108700  |
| N | 1.30499500  | -0.43982100 | 0.81333800  |
| C | 2.65207700  | -0.93368100 | 0.51363100  |
| H | 3.41373100  | -0.34224500 | 1.02688400  |
| C | 0.43637100  | -1.50052600 | 1.35151900  |
| H | 0.36321200  | -1.39006100 | 2.44146100  |
| H | -0.55778800 | -1.42834500 | 0.91411300  |
| C | 1.16318000  | -2.77938600 | 0.95256600  |
| H | 0.90602800  | -3.62055900 | 1.59790800  |
| H | 0.90524600  | -3.03914000 | -0.07966900 |
| C | 2.63563200  | -2.37779800 | 1.05497700  |
| H | 2.95224200  | -2.36665800 | 2.10174300  |
| H | 3.31475100  | -3.02390800 | 0.49717100  |
| C | 1.92268100  | 1.83683000  | 0.18001000  |
| H | 2.91850700  | 1.65306600  | 0.59242800  |
| H | 1.99343500  | 1.70603800  | -0.90889700 |
| C | -0.94367900 | 0.51261500  | -1.09509200 |
| H | -0.62058400 | 1.48919300  | -1.48687200 |
| C | -2.45495000 | 0.34173200  | -0.99059200 |
| O | -0.29968200 | -0.53919700 | -1.37096800 |

|   |             |             |             |
|---|-------------|-------------|-------------|
| C | 3.03717500  | -0.91072400 | -0.97606600 |
| O | 2.10761000  | -0.75934300 | -1.88702700 |
| O | 4.21030000  | -1.06168500 | -1.26655300 |
| H | 1.11587400  | -0.63184300 | -1.58218200 |
| C | -2.94723000 | -0.82350200 | -0.16020100 |
| H | -2.72887200 | -0.62759500 | 0.89735600  |
| C | -4.44424600 | -1.08102800 | -0.33386300 |
| H | -2.37426100 | -1.70859600 | -0.46047300 |
| C | -4.92533000 | -2.24227200 | 0.53312300  |
| H | -5.99537500 | -2.42110900 | 0.39910900  |
| H | -4.39429400 | -3.16536000 | 0.27862600  |
| H | -4.74893100 | -2.03577500 | 1.59386100  |
| H | -4.65146400 | -1.29465000 | -1.38955200 |
| H | -5.00055400 | -0.17210000 | -0.07958500 |
| H | -2.79222200 | 0.22303600  | -2.03136700 |
| C | 1.49696100  | 3.26646100  | 0.49464100  |
| C | -0.72427700 | 2.71464600  | 0.93420000  |
| H | 1.62011600  | 3.47376400  | 1.56808200  |
| H | 2.10319000  | 3.97758200  | -0.06847600 |
| H | -1.72986100 | 2.89461700  | 0.55695100  |
| H | -0.67552300 | 3.09091100  | 1.96924300  |
| F | -3.04058600 | 1.52578900  | -0.53246100 |
| O | 0.15055600  | 3.47444800  | 0.11931500  |

(R)-TS3<sub>p</sub>-F-P

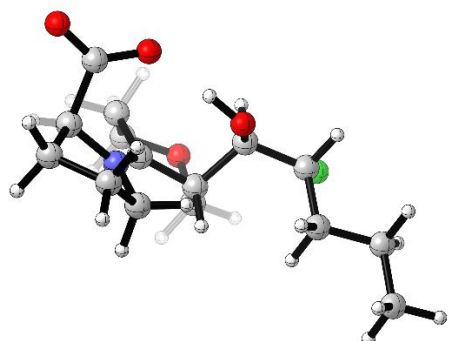

-----  
- Thermochemistry -  
-----

|                                              |                             |
|----------------------------------------------|-----------------------------|
| Zero-point correction=                       | 0.391146 (Hartree/Particle) |
| Thermal correction to Energy=                | 0.408579                    |
| Thermal correction to Enthalpy=              | 0.409444                    |
| Thermal correction to Gibbs Free Energy=     | 0.347343                    |
| Sum of electronic and zero-point Energies=   | -1040.786751                |
| Sum of electronic and thermal Energies=      | -1040.769318                |
| Sum of electronic and thermal Enthalpies=    | -1040.768453                |
| Sum of electronic and thermal Free Energies= | -1040.830554                |

Number of Imaginary Frequencies = 0

E (Single Point Energy) [IEFPCM(DCM)M06-2X/6-311++G(2d,2p)] = -1041.467264

|   |             |             |             |
|---|-------------|-------------|-------------|
| C | 0.59550100  | 0.67073000  | -0.61610500 |
| H | 0.91915900  | -0.15016900 | -1.25912100 |
| C | -0.90218500 | 0.73369500  | -0.56103600 |
| N | -1.62540700 | -0.30817600 | -0.79403700 |
| C | -3.06168700 | -0.40214900 | -0.44997800 |
| H | -3.60783600 | 0.44734200  | -0.86040300 |
| C | -1.10599700 | -1.63686100 | -1.23941300 |
| H | -0.92172200 | -1.57036600 | -2.31597500 |
| H | -0.18427800 | -1.86676400 | -0.70946800 |
| C | -2.24625900 | -2.59752300 | -0.91346800 |

|   |             |             |             |
|---|-------------|-------------|-------------|
| H | -2.23458300 | -3.46598100 | -1.57303300 |
| H | -2.15397500 | -2.94437300 | 0.12032200  |
| C | -3.49432000 | -1.72895400 | -1.07393600 |
| H | -3.73243600 | -1.58827600 | -2.13281400 |
| H | -4.37359900 | -2.12260500 | -0.56412200 |
| C | -1.49207700 | 2.02504900  | -0.08027900 |
| H | -2.55780000 | 2.09823600  | -0.29724100 |
| H | -1.38206700 | 2.03350900  | 1.01168100  |
| C | 1.05268800  | 0.37508900  | 0.85249800  |
| H | 0.82560200  | 1.25628900  | 1.46849700  |
| C | 2.55523200  | 0.10805600  | 0.98722000  |
| O | 0.42389900  | -0.77995300 | 1.35091000  |
| C | -3.23761900 | -0.39752300 | 1.11225200  |
| O | -2.19731900 | -0.31903900 | 1.81920200  |
| O | -4.41901700 | -0.47049300 | 1.48070400  |
| H | -0.52702300 | -0.60449400 | 1.55963900  |
| C | 3.13506600  | -0.89022100 | 0.00698600  |
| H | 3.12518200  | -0.45427100 | -1.00094600 |
| C | 4.55949500  | -1.31449500 | 0.36408000  |
| H | 2.47503900  | -1.76772600 | -0.00703200 |
| C | 5.13540100  | -2.29725300 | -0.65269900 |
| H | 6.15129200  | -2.59789300 | -0.38343400 |
| H | 4.52072900  | -3.20146600 | -0.71233900 |
| H | 5.17050600  | -1.84948200 | -1.65132800 |
| H | 4.55712600  | -1.76998700 | 1.36169000  |
| H | 5.19613100  | -0.42471000 | 0.42367600  |
| H | 2.71712800  | -0.22618600 | 2.01791500  |
| C | -0.74575100 | 3.22581100  | -0.67713900 |



|   |             |            |             |
|---|-------------|------------|-------------|
| C | 1.16131200  | 1.98684700 | -1.17796100 |
| H | -0.96853500 | 3.31927300 | -1.74964300 |
| H | -1.06366500 | 4.13931900 | -0.17411200 |
| H | 2.24488200  | 2.00834000 | -1.06853300 |
| H | 0.91292800  | 2.06144900 | -2.24677600 |
| F | 3.24085000  | 1.32755900 | 0.85490000  |
| O | 0.64858700  | 3.10553500 | -0.48570000 |

(S)-TS3<sub>P</sub>-F-Pre

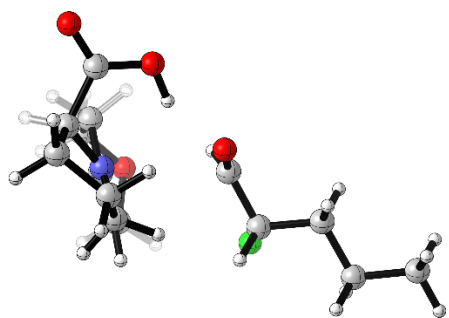

-----  
 - Thermochemistry -  
 -----

|                                              |                             |
|----------------------------------------------|-----------------------------|
| Zero-point correction=                       | 0.386566 (Hartree/Particle) |
| Thermal correction to Energy=                | 0.405752                    |
| Thermal correction to Enthalpy=              | 0.406617                    |
| Thermal correction to Gibbs Free Energy=     | 0.338545                    |
| Sum of electronic and zero-point Energies=   | -1040.767796                |
| Sum of electronic and thermal Energies=      | -1040.748610                |
| Sum of electronic and thermal Enthalpies=    | -1040.747745                |
| Sum of electronic and thermal Free Energies= | -1040.815817                |

Number of Imaginary Frequencies = 0

E (Single Point Energy) [IEFPCM(DCM)M06-2X/6-311++G(2d,2p)] = -1041.445581

|   |             |            |            |
|---|-------------|------------|------------|
| C | 0.22502800  | 1.57570100 | 1.27301800 |
| H | -0.16960900 | 1.05985800 | 2.14304100 |
| C | 1.20251700  | 1.03252500 | 0.51718800 |

|   |             |             |             |
|---|-------------|-------------|-------------|
| N | 1.65779200  | -0.26992000 | 0.68529800  |
| C | 3.00587400  | -0.68078000 | 0.29893800  |
| H | 3.74566500  | 0.11596000  | 0.42367300  |
| C | 1.13971400  | -1.09367500 | 1.77730800  |
| H | 1.31796500  | -0.61241100 | 2.75181500  |
| H | 0.06169400  | -1.23886800 | 1.65518900  |
| C | 1.94195200  | -2.38294200 | 1.64514600  |
| H | 1.95954900  | -2.96265200 | 2.56948100  |
| H | 1.51742000  | -3.00795000 | 0.85201100  |
| C | 3.32462600  | -1.86223700 | 1.24472100  |
| H | 3.84678300  | -1.47395200 | 2.12355500  |
| H | 3.96456800  | -2.60741900 | 0.76894400  |
| C | 1.74601000  | 1.78616800  | -0.67502800 |
| H | 2.84000600  | 1.73996400  | -0.70694800 |
| H | 1.38045200  | 1.31588300  | -1.59882800 |
| C | -1.33649400 | -0.01197900 | -0.75658300 |
| H | -1.10704200 | 0.95672500  | -1.23639900 |
| C | -2.59304500 | -0.05995500 | 0.08517900  |
| O | -0.66025600 | -1.00598100 | -0.93371100 |
| C | 3.10353500  | -1.13011300 | -1.16181100 |
| O | 1.96899000  | -1.38587800 | -1.80449500 |
| O | 4.17752400  | -1.28376700 | -1.70251200 |
| H | 1.17879600  | -1.17459900 | -1.25927200 |
| C | -3.66895700 | -0.90988800 | -0.57355700 |
| H | -3.24495800 | -1.90860900 | -0.73091900 |
| C | -4.94214300 | -0.99722000 | 0.26630800  |
| H | -3.89327800 | -0.49035800 | -1.56265400 |
| C | -6.00999500 | -1.85053400 | -0.41459000 |

|   |             |             |             |
|---|-------------|-------------|-------------|
| H | -6.91563800 | -1.90984300 | 0.19455300  |
| H | -6.28442900 | -1.42807900 | -1.38645100 |
| H | -5.64762900 | -2.86985500 | -0.58216500 |
| H | -5.32920200 | 0.01169100  | 0.44345900  |
| H | -4.69552100 | -1.42061900 | 1.24774200  |
| H | -2.35154400 | -0.43401000 | 1.08741100  |
| C | 1.31372400  | 3.24691800  | -0.62802900 |
| C | -0.36927800 | 2.92521900  | 0.95657500  |
| H | 1.87520500  | 3.78478400  | 0.15072600  |
| H | 1.49347000  | 3.73623500  | -1.58686500 |
| H | -1.45927700 | 2.88660300  | 1.02761700  |
| H | -0.01176000 | 3.68796000  | 1.66844500  |
| O | -0.07454600 | 3.34496400  | -0.36565200 |
| F | -3.05203800 | 1.25056200  | 0.22978000  |

(S)-TS3<sub>P</sub>-F

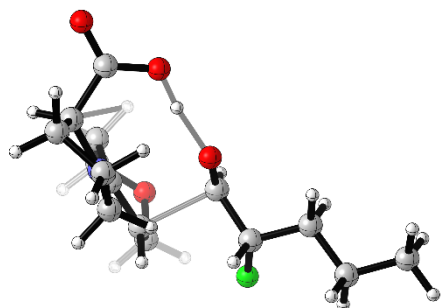

-----  
 - Thermochemistry -  
 -----

|                                            |                             |
|--------------------------------------------|-----------------------------|
| Zero-point correction=                     | 0.386472 (Hartree/Particle) |
| Thermal correction to Energy=              | 0.404048                    |
| Thermal correction to Enthalpy=            | 0.404913                    |
| Thermal correction to Gibbs Free Energy=   | 0.342145                    |
| Sum of electronic and zero-point Energies= | -1040.759717                |
| Sum of electronic and thermal Energies=    | -1040.742141                |
| Sum of electronic and thermal Enthalpies=  | -1040.741276                |

Sum of electronic and thermal Free Energies= -1040.804044

Number of Imaginary Frequencies = 1

E (Single Point Energy) [IEFPCM(DCM)M06-2X/6-311++G(2d,2p)] = -1041.435820

|   |             |             |             |
|---|-------------|-------------|-------------|
| C | -0.07609300 | 1.41960400  | 0.97632600  |
| H | -0.48006600 | 0.96941400  | 1.87851800  |
| C | 1.16676700  | 1.00587200  | 0.51150400  |
| N | 1.66858700  | -0.20051700 | 0.80752300  |
| C | 2.91790100  | -0.73957800 | 0.26387300  |
| H | 3.73478500  | -0.02033200 | 0.35810000  |
| C | 1.08439300  | -1.08682600 | 1.82966500  |
| H | 1.30617600  | -0.68507100 | 2.82710300  |
| H | 0.00534700  | -1.15196200 | 1.69871500  |
| C | 1.78753500  | -2.41530300 | 1.57764700  |
| H | 1.79768400  | -3.05311800 | 2.46261700  |
| H | 1.27939300  | -2.94896000 | 0.76761300  |
| C | 3.18705200  | -1.97968300 | 1.14012500  |
| H | 3.77816600  | -1.67711100 | 2.00912800  |
| H | 3.74309400  | -2.74375900 | 0.59530400  |
| C | 1.87622200  | 1.82760200  | -0.53733900 |
| H | 2.95981400  | 1.78062600  | -0.39820600 |
| H | 1.65669100  | 1.40264800  | -1.52653600 |
| C | -1.12806700 | 0.14213000  | -0.45258600 |
| H | -1.12680500 | 0.98721400  | -1.15956300 |
| C | -2.42718700 | -0.08882300 | 0.30599200  |
| O | -0.46681100 | -0.90629100 | -0.69223200 |
| C | 2.86894200  | -1.12170000 | -1.22615100 |
| O | 1.71295300  | -1.22639200 | -1.83622700 |
| O | 3.92186400  | -1.34153500 | -1.79660000 |

|   |             |             |             |
|---|-------------|-------------|-------------|
| H | 0.84700800  | -1.02869000 | -1.29793300 |
| C | -3.43996500 | -0.78302000 | -0.59246400 |
| H | -2.98479500 | -1.71576100 | -0.94356100 |
| C | -4.76012300 | -1.07273500 | 0.12098400  |
| H | -3.61547800 | -0.15245700 | -1.47445600 |
| C | -5.75778300 | -1.77472900 | -0.79806600 |
| H | -6.69781500 | -1.98055800 | -0.27927100 |
| H | -5.98388300 | -1.15532400 | -1.67202800 |
| H | -5.35465300 | -2.72684500 | -1.15802400 |
| H | -5.18926600 | -0.13446900 | 0.48784600  |
| H | -4.56215100 | -1.69712600 | 1.00120600  |
| H | -2.23223200 | -0.68403900 | 1.20555100  |
| C | 1.41799700  | 3.28033300  | -0.49385100 |
| C | -0.53774800 | 2.83573100  | 0.69530400  |
| H | 1.80693700  | 3.77691600  | 0.40761600  |
| H | 1.77668000  | 3.82099500  | -1.37097200 |
| H | -1.62101000 | 2.86935000  | 0.57989400  |
| H | -0.26398800 | 3.49830400  | 1.53255400  |
| O | 0.00661100  | 3.35010900  | -0.50689100 |
| F | -2.97063500 | 1.12815100  | 0.72732700  |

(S)-TS3<sub>P</sub>-F-P

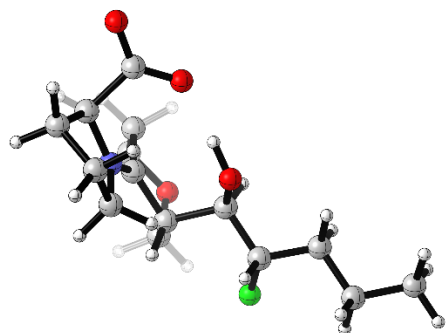

-----  
- Thermochemistry -  
-----

|                                              |                             |
|----------------------------------------------|-----------------------------|
| Zero-point correction=                       | 0.390783 (Hartree/Particle) |
| Thermal correction to Energy=                | 0.408314                    |
| Thermal correction to Enthalpy=              | 0.409179                    |
| Thermal correction to Gibbs Free Energy=     | 0.346494                    |
| Sum of electronic and zero-point Energies=   | -1040.786391                |
| Sum of electronic and thermal Energies=      | -1040.768859                |
| Sum of electronic and thermal Enthalpies=    | -1040.767994                |
| Sum of electronic and thermal Free Energies= | -1040.830680                |

Number of Imaginary Frequencies = 0

E (Single Point Energy) [IEFPCM<sub>(DCM)</sub>M06-2X/6-311++G(2d,2p)] = -1041.466319

|   |             |             |             |
|---|-------------|-------------|-------------|
| C | -0.31482100 | 1.05173300  | 0.77221100  |
| H | -0.40618700 | 0.66007500  | 1.78941000  |
| C | 1.09889500  | 0.91818900  | 0.27981400  |
| N | 1.87758500  | -0.00562000 | 0.73044000  |
| C | 3.17430300  | -0.36890800 | 0.11434800  |
| H | 3.79168400  | 0.52079200  | -0.01384000 |
| C | 1.52212000  | -0.97376600 | 1.81065800  |
| H | 1.63374800  | -0.45409000 | 2.76716200  |
| H | 0.49565000  | -1.30743300 | 1.67663400  |
| C | 2.54875900  | -2.09049100 | 1.64472000  |
| H | 2.72688200  | -2.60973000 | 2.58706000  |

|   |             |             |             |
|---|-------------|-------------|-------------|
| H | 2.18981000  | -2.81677200 | 0.90891200  |
| C | 3.77947800  | -1.35679700 | 1.11153400  |
| H | 4.28567200  | -0.81771400 | 1.91836100  |
| H | 4.50005100  | -2.00602500 | 0.61454000  |
| C | 1.50172800  | 1.80768900  | -0.85756800 |
| H | 2.58210900  | 1.83367100  | -0.99937800 |
| H | 1.06739700  | 1.36510700  | -1.76365500 |
| C | -1.19820000 | 0.18026600  | -0.19066600 |
| H | -1.38165100 | 0.76916400  | -1.10248000 |
| C | -2.53315200 | -0.20698500 | 0.45460700  |
| O | -0.60823400 | -1.06194200 | -0.48364100 |
| C | 2.94799300  | -1.01443300 | -1.30111300 |
| O | 1.76728300  | -1.08199600 | -1.73489700 |
| O | 3.99528300  | -1.38483400 | -1.85153900 |
| H | 0.23258900  | -0.99188100 | -1.00100800 |
| C | -3.51582900 | -0.80229000 | -0.53191900 |
| H | -3.01210300 | -1.62597400 | -1.04903500 |
| C | -4.79874400 | -1.30118600 | 0.13195800  |
| H | -3.75194200 | -0.03820400 | -1.28471300 |
| C | -5.77741700 | -1.88289700 | -0.88606200 |
| H | -6.68986800 | -2.24046600 | -0.40144500 |
| H | -6.06275800 | -1.12848100 | -1.62650000 |
| H | -5.32764800 | -2.72447500 | -1.42287000 |
| H | -5.27385500 | -0.47563300 | 0.67310400  |
| H | -4.54357700 | -2.06399000 | 0.87822600  |
| H | -2.32387100 | -0.90458300 | 1.27631500  |
| C | 0.94765900  | 3.22370200  | -0.67808200 |
| C | -0.72349100 | 2.53965400  | 0.79149700  |

|   |             |            |             |
|---|-------------|------------|-------------|
| H | 1.45895700  | 3.73802900 | 0.14824000  |
| H | 1.10076000  | 3.79574600 | -1.59359900 |
| H | -1.79314500 | 2.63069300 | 0.96233800  |
| H | -0.19000200 | 3.04661100 | 1.60858500  |
| O | -0.44154100 | 3.18238400 | -0.43351500 |
| F | -3.12331200 | 0.92390500 | 1.04107400  |

(R)-TS3<sub>G</sub>-F-Pre

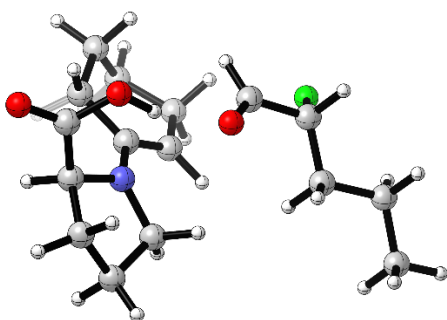

-----  
- Thermochemistry -  
-----

|                                              |                             |
|----------------------------------------------|-----------------------------|
| Zero-point correction=                       | 0.410012 (Hartree/Particle) |
| Thermal correction to Energy=                | 0.429436                    |
| Thermal correction to Enthalpy=              | 0.430301                    |
| Thermal correction to Gibbs Free Energy=     | 0.362756                    |
| Sum of electronic and zero-point Energies=   | -1004.852010                |
| Sum of electronic and thermal Energies=      | -1004.832586                |
| Sum of electronic and thermal Enthalpies=    | -1004.831721                |
| Sum of electronic and thermal Free Energies= | -1004.899267                |

Number of Imaginary Frequencies = 0

E (Single Point Energy) [IEFPCM<sub>(DCM)</sub>M06-2X/6-311++G(2d,2p)] = -1005.539197

|   |             |             |             |
|---|-------------|-------------|-------------|
| C | 0.20753400  | 1.35316400  | -1.00903900 |
| H | 1.00020400  | 0.68466100  | -1.33125400 |
| C | -0.99067800 | 0.84123300  | -0.64086200 |
| N | -1.25082100 | -0.52815900 | -0.66054000 |



|   |             |             |             |
|---|-------------|-------------|-------------|
| C | -2.57606900 | -1.08903600 | -0.43246600 |
| H | -3.35164000 | -0.62825700 | -1.05784400 |
| C | -0.40858000 | -1.43007700 | -1.45792200 |
| H | 0.41936000  | -1.81958100 | -0.85152000 |
| H | 0.01674400  | -0.88682800 | -2.30859200 |
| C | -1.36301900 | -2.53606000 | -1.91134900 |
| H | -0.85873000 | -3.49310600 | -2.05744800 |
| H | -1.84036500 | -2.24952100 | -2.85372600 |
| C | -2.40317300 | -2.57828600 | -0.79468400 |
| H | -3.35248500 | -3.03177900 | -1.08254300 |
| H | -2.00501600 | -3.12291800 | 0.06930100  |
| C | -2.11873900 | 1.73249100  | -0.16077600 |
| H | -2.91465200 | 1.73230700  | -0.91815000 |
| H | -2.56384800 | 1.32344000  | 0.75226500  |
| C | -0.75562800 | 3.67702700  | -0.99545700 |
| C | 1.17098200  | 0.16623100  | 1.55932400  |
| H | 0.68025500  | 1.12824700  | 1.78312600  |
| C | 2.65895300  | 0.22947000  | 1.28383100  |
| O | 0.57337800  | -0.89130900 | 1.60943700  |
| C | -3.06253200 | -1.00128100 | 1.00945300  |
| O | -2.13755400 | -0.96503600 | 1.96399600  |
| O | -4.24298300 | -1.02697800 | 1.28490300  |
| C | 3.15672500  | -0.77834600 | 0.26835000  |
| H | 2.79306500  | -1.76422300 | 0.58117100  |
| C | 4.67919000  | -0.78554800 | 0.14082200  |
| H | 5.02480400  | 0.21786700  | -0.13038000 |
| H | 5.12028100  | -1.02007500 | 1.11738700  |
| H | 2.69620000  | -0.55774600 | -0.70252400 |

|   |             |             |             |
|---|-------------|-------------|-------------|
| C | 5.15572500  | -1.79656600 | -0.89953100 |
| H | 6.24573400  | -1.79678400 | -0.98090000 |
| H | 4.83642400  | -2.80969000 | -0.63453400 |
| H | 4.74443200  | -1.56273700 | -1.88682200 |
| H | -1.21660500 | -0.93063000 | 1.61200300  |
| H | 3.16721700  | 0.08851200  | 2.24933400  |
| C | -1.66264000 | 3.16571200  | 0.11932300  |
| H | -2.54158800 | 3.80523300  | 0.24380700  |
| H | -1.11014100 | 3.19177200  | 1.06808800  |
| C | 0.51459500  | 2.83038900  | -1.04326600 |
| H | 1.16522800  | 3.09899300  | -0.19786000 |
| H | 1.08948100  | 3.05903700  | -1.94813800 |
| H | -1.28488800 | 3.60445100  | -1.95490500 |
| H | -0.50572000 | 4.73118700  | -0.83939000 |
| F | 2.94926700  | 1.52986300  | 0.86696000  |

(R)-TS3<sub>G</sub>-F

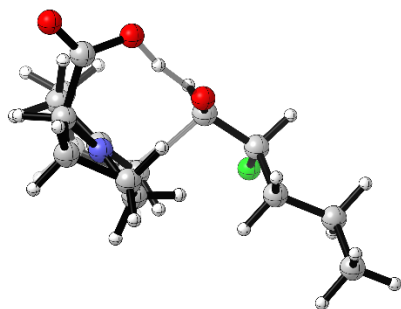

-----  
- Thermochemistry -  
-----

|                                            |                             |
|--------------------------------------------|-----------------------------|
| Zero-point correction=                     | 0.410619 (Hartree/Particle) |
| Thermal correction to Energy=              | 0.428127                    |
| Thermal correction to Enthalpy=            | 0.428992                    |
| Thermal correction to Gibbs Free Energy=   | 0.367347                    |
| Sum of electronic and zero-point Energies= | -1004.845557                |
| Sum of electronic and thermal Energies=    | -1004.828049                |

Sum of electronic and thermal Enthalpies= -1004.827184  
Sum of electronic and thermal Free Energies= -1004.888828

Number of Imaginary Frequencies = 1

E (Single Point Energy) [IEFPCM(DCM)M06-2X/6-311++G(2d,2p)] = -1005.531517

|   |             |             |             |
|---|-------------|-------------|-------------|
| C | 0.41919200  | 1.27925000  | -0.78392400 |
| H | 1.05812500  | 0.60641500  | -1.34656300 |
| C | -0.90915100 | 0.89944000  | -0.61229000 |
| N | -1.29631200 | -0.37779500 | -0.76060000 |
| C | -2.65349300 | -0.86379000 | -0.50607000 |
| H | -3.40258500 | -0.17207000 | -0.89882400 |
| C | -0.44912200 | -1.41363900 | -1.37817200 |
| H | 0.52319400  | -1.44929800 | -0.88940600 |
| H | -0.31218700 | -1.17731300 | -2.44204300 |
| C | -1.25209400 | -2.69471600 | -1.17460700 |
| H | -1.04216300 | -3.10709900 | -0.18169800 |
| H | -1.01369400 | -3.45371200 | -1.92108400 |
| C | -2.69972700 | -2.20723100 | -1.25513600 |
| H | -2.98062500 | -2.02390200 | -2.29635600 |
| H | -3.42775300 | -2.88868900 | -0.81363700 |
| C | -1.95457100 | 1.87199100  | -0.11362200 |
| H | -2.73206100 | 1.93698800  | -0.88654500 |
| H | -2.44102000 | 1.46487500  | 0.78069200  |
| C | -0.40138200 | 3.67434500  | -0.89969400 |
| C | 0.96666500  | 0.45094300  | 1.15972700  |
| H | 0.65543000  | 1.39972400  | 1.62322100  |
| C | 2.47784800  | 0.29375100  | 1.01090000  |
| O | 0.33272700  | -0.61637100 | 1.39463200  |
| C | -3.00393600 | -1.05387600 | 0.98205100  |

|   |             |             |             |
|---|-------------|-------------|-------------|
| O | -2.06919500 | -0.93322800 | 1.89243700  |
| O | -4.15754100 | -1.31824200 | 1.27076600  |
| C | 2.94928500  | -0.86997000 | 0.16603000  |
| H | 2.39044100  | -1.75826300 | 0.48195000  |
| C | 4.45250600  | -1.11846500 | 0.29398000  |
| H | 4.99564800  | -0.20696900 | 0.02099100  |
| H | 4.69350800  | -1.32873800 | 1.34324300  |
| H | 2.69843100  | -0.67535400 | -0.88461100 |
| C | 4.91373300  | -2.27894100 | -0.58478200 |
| H | 5.98836800  | -2.45168800 | -0.48302400 |
| H | 4.39571500  | -3.20434100 | -0.31243000 |
| H | 4.70394100  | -2.07579600 | -1.64006400 |
| H | -1.08792800 | -0.74364400 | 1.58942300  |
| H | 2.84816800  | 0.17674000  | 2.04077000  |
| C | -1.40647100 | 3.27048100  | 0.17347800  |
| H | -2.24286600 | 3.97252200  | 0.23000700  |
| H | -0.91169600 | 3.28557200  | 1.15281200  |
| C | 0.80977700  | 2.74802400  | -0.80976500 |
| H | 1.37405700  | 3.00786900  | 0.09463300  |
| H | 1.49287400  | 2.91760900  | -1.64792800 |
| H | -0.86959000 | 3.59593000  | -1.88984800 |
| H | -0.08867000 | 4.71434700  | -0.76658100 |
| F | 3.04520400  | 1.47777800  | 0.53286600  |

(R)-TS3<sub>G</sub>-F-P

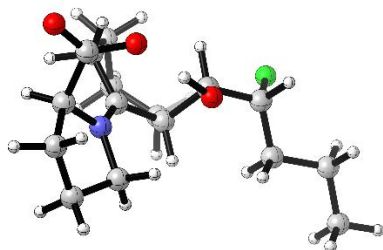

-----  
- Thermochemistry -  
-----

|                                              |                             |
|----------------------------------------------|-----------------------------|
| Zero-point correction=                       | 0.414601 (Hartree/Particle) |
| Thermal correction to Energy=                | 0.432413                    |
| Thermal correction to Enthalpy=              | 0.433278                    |
| Thermal correction to Gibbs Free Energy=     | 0.370408                    |
| Sum of electronic and zero-point Energies=   | -1004.870016                |
| Sum of electronic and thermal Energies=      | -1004.852205                |
| Sum of electronic and thermal Enthalpies=    | -1004.851340                |
| Sum of electronic and thermal Free Energies= | -1004.914209                |

Number of Imaginary Frequencies = 0

E (Single Point Energy) [IEFPCM<sub>(DCM)</sub>M06-2X/6-311++G(2d,2p)] = -1005.559390

|   |             |             |             |
|---|-------------|-------------|-------------|
| C | 0.60595200  | 0.52829800  | -0.62900800 |
| H | 0.87852100  | -0.39134200 | -1.14715700 |
| C | -0.88410500 | 0.64334100  | -0.54477500 |
| N | -1.64181600 | -0.39129100 | -0.71194400 |
| C | -3.05538000 | -0.43565200 | -0.27051000 |
| H | -3.61761500 | 0.34684500  | -0.78583700 |
| C | -1.22568400 | -1.71138900 | -1.25233500 |
| H | -0.79764300 | -2.29522900 | -0.43193600 |
| H | -0.48176900 | -1.57601900 | -2.03567800 |
| C | -2.54508000 | -2.28774800 | -1.74987500 |
| H | -2.49385100 | -3.37176000 | -1.86026200 |
| H | -2.79928900 | -1.84893600 | -2.71954400 |
| C | -3.53683700 | -1.84237300 | -0.67496000 |

|   |             |             |             |
|---|-------------|-------------|-------------|
| H | -4.57100300 | -1.82102600 | -1.01785600 |
| H | -3.47756400 | -2.51188400 | 0.18902700  |
| C | -1.48416400 | 1.95061000  | -0.10566900 |
| H | -2.39206400 | 2.11608900  | -0.69706900 |
| H | -1.80803900 | 1.84583200  | 0.93718400  |
| C | 0.32220800  | 2.92104400  | -1.53594800 |
| C | 1.02221700  | 0.29043500  | 0.87059800  |
| H | 0.74359100  | 1.17099400  | 1.46881600  |
| C | 2.52948300  | 0.07545900  | 1.06622400  |
| O | 0.41474400  | -0.87620200 | 1.36142000  |
| C | -3.18443500 | -0.24014000 | 1.27074400  |
| O | -2.13768500 | -0.36342900 | 1.96466000  |
| O | -4.34282800 | -0.02688900 | 1.65891800  |
| C | 3.20079200  | -0.82731700 | 0.05325700  |
| H | 2.59414800  | -1.73850400 | -0.03480400 |
| C | 4.63395500  | -1.19119500 | 0.44002400  |
| H | 5.21776200  | -0.27263200 | 0.56556100  |
| H | 4.62433100  | -1.69573000 | 1.41381200  |
| H | 3.19633700  | -0.33316400 | -0.92770300 |
| C | 5.29730400  | -2.08903600 | -0.60176200 |
| H | 6.31985000  | -2.34535300 | -0.31239300 |
| H | 4.73793700  | -3.02221900 | -0.72557500 |
| H | 5.33807600  | -1.59119300 | -1.57615000 |
| H | -0.53359200 | -0.70362500 | 1.59788400  |
| H | 2.64711600  | -0.32607200 | 2.07853800  |
| C | -0.52482800 | 3.13430800  | -0.28532700 |
| H | -1.11483000 | 4.05152700  | -0.34933100 |
| H | 0.13081000  | 3.23836600  | 0.58693400  |

|   |             |            |             |
|---|-------------|------------|-------------|
| C | 1.27978900  | 1.74695200 | -1.31274400 |
| H | 2.11317800  | 2.08612600 | -0.69408400 |
| H | 1.70400600  | 1.42017500 | -2.26610400 |
| H | -0.33942700 | 2.71902800 | -2.38932700 |
| H | 0.89600400  | 3.81841600 | -1.78111800 |
| F | 3.17741800  | 1.32321200 | 1.06557600  |

(S)-TS3<sub>G</sub>-F-Pre

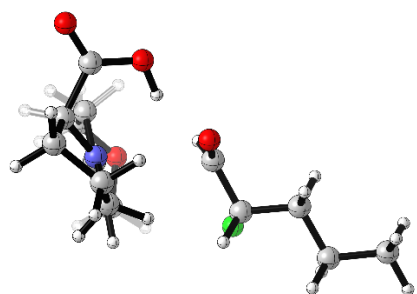

-----  
 - Thermochemistry -  
 -----

|                                              |                             |
|----------------------------------------------|-----------------------------|
| Zero-point correction=                       | 0.410464 (Hartree/Particle) |
| Thermal correction to Energy=                | 0.429723                    |
| Thermal correction to Enthalpy=              | 0.430588                    |
| Thermal correction to Gibbs Free Energy=     | 0.363097                    |
| Sum of electronic and zero-point Energies=   | -1004.855344                |
| Sum of electronic and thermal Energies=      | -1004.836085                |
| Sum of electronic and thermal Enthalpies=    | -1004.835220                |
| Sum of electronic and thermal Free Energies= | -1004.902711                |

Number of Imaginary Frequencies = 0

E (Single Point Energy) [IEFPCM(DCM)M06-2X/6-311++G(2d,2p)] = -1005.542809

|   |             |             |            |
|---|-------------|-------------|------------|
| C | 0.11288900  | 1.51187000  | 1.31815800 |
| H | -0.13540900 | 0.91451600  | 2.19109800 |
| C | 1.07772700  | 1.08682900  | 0.47304100 |
| N | 1.75351900  | -0.12242200 | 0.65872400 |
| C | 3.06580500  | -0.36920800 | 0.06578400 |

|   |             |             |             |
|---|-------------|-------------|-------------|
| H | 3.63914100  | 0.54648700  | -0.10230800 |
| C | 1.58288900  | -0.86730400 | 1.90772100  |
| H | 0.55696000  | -1.23965300 | 1.98873900  |
| H | 1.78527500  | -0.21696000 | 2.77375200  |
| C | 2.61751500  | -1.98255200 | 1.79858000  |
| H | 2.22668000  | -2.80243600 | 1.18561300  |
| H | 2.89769800  | -2.38782300 | 2.77234000  |
| C | 3.77822900  | -1.28102500 | 1.08911200  |
| H | 4.32377000  | -0.65031700 | 1.79675100  |
| H | 4.48967300  | -1.95858500 | 0.61322000  |
| C | 1.43803600  | 1.86038600  | -0.77934900 |
| H | 2.41222300  | 2.34760500  | -0.63991700 |
| H | 1.56218400  | 1.16283800  | -1.61851100 |
| C | 0.00420100  | 3.71989500  | 0.10819600  |
| C | -1.18050400 | -0.59072400 | -0.61991500 |
| H | -0.73957200 | 0.05534400  | -1.40273300 |
| C | -2.52703900 | -0.15191500 | -0.08818700 |
| O | -0.63478000 | -1.60942000 | -0.24977400 |
| C | 2.97858700  | -1.07477600 | -1.29060300 |
| O | 1.82725300  | -1.66995000 | -1.59328100 |
| O | 3.92505900  | -1.12410900 | -2.04611800 |
| H | 1.15138100  | -1.53534100 | -0.89111700 |
| C | -3.60042000 | -1.20560800 | -0.30228800 |
| H | -3.24995800 | -2.12795800 | 0.17553000  |
| H | -2.42717700 | 0.10618400  | 0.97362600  |
| C | -4.95377800 | -0.78806100 | 0.27006600  |
| H | -5.26830400 | 0.15316200  | -0.19307400 |
| H | -3.68647800 | -1.40791500 | -1.37730100 |



|   |             |             |             |
|---|-------------|-------------|-------------|
| H | -4.84387500 | -0.59283900 | 1.34389700  |
| C | -6.01844600 | -1.85895300 | 0.04283900  |
| H | -6.98198000 | -1.55221400 | 0.45789900  |
| H | -6.15719800 | -2.04936200 | -1.02619300 |
| H | -5.73088700 | -2.80278600 | 0.51712200  |
| C | 0.38735300  | 2.91484900  | -1.13107800 |
| C | -0.64997700 | 2.80164900  | 1.14038900  |
| H | 0.77506600  | 3.56418100  | -1.92160500 |
| H | -0.51184400 | 2.42477300  | -1.52782500 |
| H | 0.90842500  | 4.17132700  | 0.53745600  |
| H | -0.67371900 | 4.53757700  | -0.15542000 |
| H | -1.68458900 | 2.58770900  | 0.83274700  |
| H | -0.72274500 | 3.31272400  | 2.10741600  |
| F | -2.86755900 | 1.01916000  | -0.76929800 |

(S)-TS3<sub>G</sub>-F

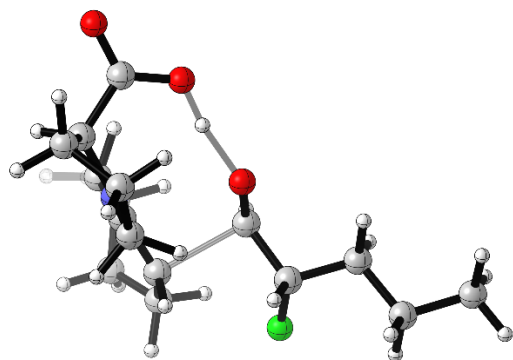

-----  
 - Thermochemistry -  
 -----

|                                            |                             |
|--------------------------------------------|-----------------------------|
| Zero-point correction=                     | 0.410416 (Hartree/Particle) |
| Thermal correction to Energy=              | 0.428066                    |
| Thermal correction to Enthalpy=            | 0.428931                    |
| Thermal correction to Gibbs Free Energy=   | 0.366469                    |
| Sum of electronic and zero-point Energies= | -1004.846572                |
| Sum of electronic and thermal Energies=    | -1004.828922                |

Sum of electronic and thermal Enthalpies= -1004.828057  
Sum of electronic and thermal Free Energies= -1004.890519

Number of Imaginary Frequencies = 1

E (Single Point Energy) [IEFPCM<sub>(DCM)</sub>M06-2X/6-311++G(2d,2p)] = -1005.532406

|   |             |             |             |
|---|-------------|-------------|-------------|
| C | -0.12518000 | 1.41565400  | 0.88284200  |
| H | -0.49712100 | 0.91313700  | 1.77049300  |
| C | 1.12333800  | 1.02849500  | 0.40612100  |
| N | 1.66413200  | -0.15206900 | 0.74797400  |
| C | 2.93126300  | -0.66257900 | 0.22262500  |
| H | 3.68748500  | 0.12497600  | 0.17661000  |
| C | 1.14345300  | -0.99420100 | 1.84085000  |
| H | 0.07904100  | -1.17962400 | 1.70388500  |
| H | 1.30289600  | -0.47918800 | 2.79762700  |
| C | 1.97650600  | -2.26739500 | 1.73135000  |
| H | 1.52945600  | -2.93755700 | 0.98922400  |
| H | 2.04319800  | -2.79931700 | 2.68148800  |
| C | 3.32821200  | -1.74897500 | 1.23781900  |
| H | 3.87836000  | -1.28246600 | 2.06017100  |
| H | 3.96254600  | -2.51116900 | 0.78384100  |
| C | 1.86465800  | 1.84248300  | -0.63047100 |
| H | 2.81710900  | 2.15214000  | -0.17947500 |
| H | 2.11988400  | 1.20802800  | -1.48719000 |
| C | 0.41421800  | 3.75852400  | 0.08075900  |
| C | -1.14392900 | 0.05753300  | -0.47555000 |
| H | -1.15701300 | 0.84648400  | -1.24467600 |
| C | -2.44206900 | -0.12441000 | 0.29904200  |
| O | -0.48555700 | -1.00623400 | -0.65205600 |
| C | 2.85282200  | -1.24627300 | -1.20100300 |

|   |             |             |             |
|---|-------------|-------------|-------------|
| O | 1.68690700  | -1.39863200 | -1.78064400 |
| O | 3.89340000  | -1.55650100 | -1.75278200 |
| H | 0.82653500  | -1.15208700 | -1.24927500 |
| C | -3.46938700 | -0.84267600 | -0.56298000 |
| H | -3.02555500 | -1.79140900 | -0.88480100 |
| H | -2.24214600 | -0.68779500 | 1.21811700  |
| C | -4.78465900 | -1.09587300 | 0.17309400  |
| H | -5.20250300 | -0.14146500 | 0.51022100  |
| H | -3.64940700 | -0.24308700 | -1.46558200 |
| H | -4.58267300 | -1.68975900 | 1.07325900  |
| C | -5.79728100 | -1.82235600 | -0.70987200 |
| H | -6.73368000 | -2.00140300 | -0.17478400 |
| H | -6.02728500 | -1.23324700 | -1.60357700 |
| H | -5.40543200 | -2.79023900 | -1.03892700 |
| C | 1.09745500  | 3.07879100  | -1.10099700 |
| C | -0.65224000 | 2.81997300  | 0.64182500  |
| H | 1.79182800  | 3.75342200  | -1.60928700 |
| H | 0.33772700  | 2.78886100  | -1.83794100 |
| H | 1.16090700  | 3.99018500  | 0.85180800  |
| H | -0.04255000 | 4.70400100  | -0.22668200 |
| H | -1.49495300 | 2.79242800  | -0.06148400 |
| H | -1.05952600 | 3.21090400  | 1.57935600  |
| F | -2.96968200 | 1.11226300  | 0.67809900  |

(S)-TS3<sub>G</sub>-F-P

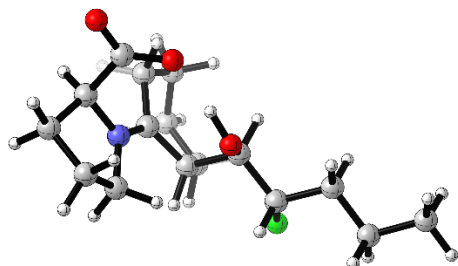

-----  
- Thermochemistry -  
-----

|                                              |                             |
|----------------------------------------------|-----------------------------|
| Zero-point correction=                       | 0.414296 (Hartree/Particle) |
| Thermal correction to Energy=                | 0.432052                    |
| Thermal correction to Enthalpy=              | 0.432917                    |
| Thermal correction to Gibbs Free Energy=     | 0.369905                    |
| Sum of electronic and zero-point Energies=   | -1004.871330                |
| Sum of electronic and thermal Energies=      | -1004.853574                |
| Sum of electronic and thermal Enthalpies=    | -1004.852709                |
| Sum of electronic and thermal Free Energies= | -1004.915721                |

Number of Imaginary Frequencies = 0

E (Single Point Energy) [IEFPCM<sub>(DCM)</sub>M06-2X/6-311++G(2d,2p)] = -1005.560329

|   |             |             |             |
|---|-------------|-------------|-------------|
| C | -0.32904200 | 1.08728600  | 0.70014900  |
| H | -0.38890100 | 0.70942000  | 1.72397300  |
| C | 1.08415500  | 0.95009300  | 0.21182200  |
| N | 1.84398700  | 0.01714100  | 0.68640400  |
| C | 3.13573000  | -0.36889900 | 0.08382300  |
| H | 3.72671700  | 0.51910400  | -0.14534900 |
| C | 1.50324900  | -0.89534400 | 1.81947300  |
| H | 0.49439700  | -1.27941100 | 1.69125900  |
| H | 1.57449200  | -0.30931300 | 2.74125800  |
| C | 2.57651800  | -1.97899300 | 1.74818700  |
| H | 2.25168500  | -2.77888800 | 1.07550500  |
| H | 2.77097900  | -2.41089800 | 2.73061300  |

|   |             |             |             |
|---|-------------|-------------|-------------|
| C | 3.78065900  | -1.24566400 | 1.15597100  |
| H | 4.26299300  | -0.62100000 | 1.91436800  |
| H | 4.52673700  | -1.90557500 | 0.71375800  |
| C | 1.59722700  | 1.81555700  | -0.90764600 |
| H | 2.58550600  | 2.18363400  | -0.60666200 |
| H | 1.75525700  | 1.17537000  | -1.78374500 |
| C | 0.12305900  | 3.55715700  | 0.08571700  |
| C | -1.18163000 | 0.11647100  | -0.20668000 |
| H | -1.35050200 | 0.62740300  | -1.16826000 |
| C | -2.52607400 | -0.21744000 | 0.45414800  |
| O | -0.59697600 | -1.14321900 | -0.39502400 |
| C | 2.90808700  | -1.15291000 | -1.26110200 |
| O | 1.72592300  | -1.27522800 | -1.68158100 |
| O | 3.95484900  | -1.56630800 | -1.78028300 |
| H | 0.24080300  | -1.11516300 | -0.92667700 |
| C | -3.52939000 | -0.80306200 | -0.51726600 |
| H | -3.03988500 | -1.63051200 | -1.04290400 |
| H | -2.32001900 | -0.91119900 | 1.27982000  |
| C | -4.80743200 | -1.29229000 | 0.16247400  |
| H | -5.26598000 | -0.46419000 | 0.71408900  |
| H | -3.76925100 | -0.03579400 | -1.26590000 |
| H | -4.54889300 | -2.06064500 | 0.90175200  |
| C | -5.80673000 | -1.85985400 | -0.84343400 |
| H | -6.71533400 | -2.21112500 | -0.34712000 |
| H | -6.09579700 | -1.09938500 | -1.57625500 |
| H | -5.37295200 | -2.70314500 | -1.39065900 |
| C | 0.69433000  | 3.01055100  | -1.21777300 |
| C | -0.86936400 | 2.54364300  | 0.65211100  |

|   |             |            |             |
|---|-------------|------------|-------------|
| H | 1.28216900  | 3.76034700 | -1.75250100 |
| H | -0.12647100 | 2.71453600 | -1.88178300 |
| H | 0.94050500  | 3.74535200 | 0.79517400  |
| H | -0.38792500 | 4.51019300 | -0.07526700 |
| H | -1.76376600 | 2.56201800 | 0.02280000  |
| H | -1.19326300 | 2.83167000 | 1.65431000  |
| F | -3.08574300 | 0.92860400 | 1.03720400  |

(R)-TS3<sub>o</sub>-F-Pre

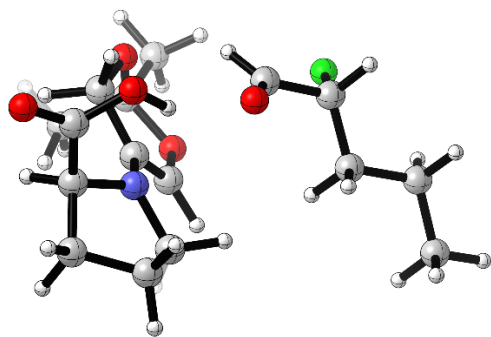

-----  
- Thermochemistry -  
-----

|                                              |                             |
|----------------------------------------------|-----------------------------|
| Zero-point correction=                       | 0.417855 (Hartree/Particle) |
| Thermal correction to Energy=                | 0.439184                    |
| Thermal correction to Enthalpy=              | 0.440049                    |
| Thermal correction to Gibbs Free Energy=     | 0.367878                    |
| Sum of electronic and zero-point Energies=   | -1155.233150                |
| Sum of electronic and thermal Energies=      | -1155.211821                |
| Sum of electronic and thermal Enthalpies=    | -1155.210956                |
| Sum of electronic and thermal Free Energies= | -1155.283126                |

Number of Imaginary Frequencies = 0

E (Single Point Energy) [IEFPCM(DCM)M06-2X/6-311++G(2d,2p)] = -1155.975514

|   |             |            |            |
|---|-------------|------------|------------|
| C | -0.33927800 | 0.88358900 | 1.20561900 |
| H | -0.77088400 | 0.19694300 | 1.92290800 |
| C | 0.78360700  | 0.64355600 | 0.50633000 |

|   |             |             |             |
|---|-------------|-------------|-------------|
| N | 1.49199900  | -0.56120900 | 0.56771500  |
| C | 2.95122600  | -0.55650100 | 0.43964900  |
| H | 3.40150000  | 0.40147000  | 0.72129100  |
| C | 1.05220700  | -1.58922700 | 1.51146500  |
| H | 0.08903900  | -2.00051400 | 1.19033400  |
| H | 0.93394600  | -1.17001000 | 2.52412400  |
| C | 2.19526000  | -2.59710800 | 1.47835900  |
| H | 2.11489700  | -3.23044400 | 0.58835300  |
| H | 2.21116400  | -3.23992100 | 2.35993400  |
| C | 3.42093800  | -1.68333300 | 1.38763200  |
| H | 3.63646500  | -1.24991000 | 2.36816700  |
| H | 4.32404300  | -2.17612300 | 1.02362300  |
| C | 1.23623600  | 1.65811900  | -0.51432900 |
| H | 2.14071900  | 2.19452800  | -0.19211300 |
| H | 1.46472100  | 1.16290300  | -1.46502100 |
| O | -1.09217100 | 2.02266300  | 1.05949000  |
| O | 0.18719400  | 2.56897000  | -0.79814600 |
| C | -0.45376500 | 3.08757000  | 0.35350200  |
| C | -1.55834900 | 3.99282800  | -0.14497300 |
| H | -2.19898100 | 3.43598600  | -0.83238500 |
| H | -1.12668800 | 4.85145000  | -0.66356500 |
| C | 0.52457400  | 3.80153800  | 1.28086900  |
| H | 1.09361500  | 4.54235400  | 0.71327100  |
| H | 1.21772600  | 3.10106000  | 1.75264800  |
| H | -0.03487700 | 4.31002300  | 2.06880500  |
| C | -1.12846500 | -0.55550600 | -1.58944000 |
| H | -0.86035700 | 0.50142600  | -1.77298800 |
| C | -2.59829800 | -0.82905100 | -1.35410000 |

|   |             |             |             |
|---|-------------|-------------|-------------|
| O | -0.30780600 | -1.44991000 | -1.60717700 |
| C | 3.40862800  | -0.85056500 | -0.99331800 |
| O | 2.48545400  | -1.27634000 | -1.84918300 |
| O | 4.56781200  | -0.72998100 | -1.32563200 |
| H | -2.15441100 | 4.34539500  | 0.69909800  |
| C | -2.86638400 | -1.62036600 | -0.08678800 |
| H | -2.23999800 | -2.51984000 | -0.12492500 |
| C | -4.33723100 | -2.00013300 | 0.07363900  |
| H | -4.94816500 | -1.09114000 | 0.06699300  |
| H | -4.64919500 | -2.59964200 | -0.79028600 |
| H | -2.53251200 | -1.02288500 | 0.77066000  |
| C | -4.58209300 | -2.78044100 | 1.36315400  |
| H | -5.63592300 | -3.05109500 | 1.46763100  |
| H | -3.99304200 | -3.70315700 | 1.37901400  |
| H | -4.29877000 | -2.18596300 | 2.23770700  |
| H | 1.59100200  | -1.28733100 | -1.43764700 |
| H | -2.99063800 | -1.35549000 | -2.23467100 |
| F | -3.24501500 | 0.40615100  | -1.29482200 |

(*R*)-TS3<sub>0</sub>-F

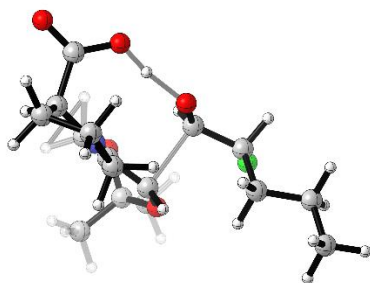

-----  
- Thermochemistry -

-----  
Zero-point correction=

0.416872 (Hartree/Particle)



|                                              |              |
|----------------------------------------------|--------------|
| Thermal correction to Energy=                | 0.436577     |
| Thermal correction to Enthalpy=              | 0.437442     |
| Thermal correction to Gibbs Free Energy=     | 0.370379     |
| Sum of electronic and zero-point Energies=   | -1155.220110 |
| Sum of electronic and thermal Energies=      | -1155.200405 |
| Sum of electronic and thermal Enthalpies=    | -1155.199540 |
| Sum of electronic and thermal Free Energies= | -1155.266603 |

Number of Imaginary Frequencies = 1

E (Single Point Energy) [IEFPCM<sub>(DCM)</sub>M06-2X/6-311++G(2d,2p)] = -1155.960428

|   |             |             |             |
|---|-------------|-------------|-------------|
| C | -0.58837000 | 0.53064500  | 0.70857300  |
| H | -0.95541000 | -0.23292700 | 1.38400600  |
| C | 0.77547700  | 0.67331200  | 0.48910900  |
| N | 1.63781200  | -0.31175000 | 0.75123800  |
| C | 3.04938200  | -0.28378100 | 0.36534400  |
| H | 3.48325500  | 0.70695900  | 0.52787200  |
| C | 1.31078100  | -1.47136500 | 1.60583800  |
| H | 0.41350200  | -1.97228600 | 1.24214600  |
| H | 1.14441800  | -1.11796200 | 2.63186600  |
| C | 2.55705100  | -2.34633500 | 1.49139700  |
| H | 2.47503200  | -2.99357700 | 0.61192500  |
| H | 2.69640100  | -2.97644300 | 2.37071600  |
| C | 3.68356800  | -1.32742800 | 1.30080500  |
| H | 3.93007100  | -0.84939300 | 2.25321300  |
| H | 4.59543200  | -1.74602400 | 0.87392500  |
| C | 1.25310800  | 1.89677100  | -0.25067100 |
| H | 1.95180400  | 2.46945600  | 0.37611800  |
| H | 1.77870600  | 1.61088100  | -1.16889900 |
| O | -1.45191000 | 1.60055200  | 0.60498600  |
| O | 0.15631300  | 2.68408200  | -0.66083100 |
| C | -0.84115800 | 2.86138400  | 0.33149900  |

|   |             |             |             |
|---|-------------|-------------|-------------|
| C | -1.91113600 | 3.73030000  | -0.28982400 |
| H | -2.24362000 | 3.27662700  | -1.22564600 |
| H | -1.51042600 | 4.72684800  | -0.48670000 |
| C | -0.27231000 | 3.44913400  | 1.61964400  |
| H | 0.30287500  | 4.35031100  | 1.39171800  |
| H | 0.37177400  | 2.74012900  | 2.14616400  |
| H | -1.09735000 | 3.71255500  | 2.28429700  |
| C | -0.75155600 | -0.51822100 | -1.12881500 |
| H | -0.52522400 | 0.38481900  | -1.71935800 |
| C | -2.23701400 | -0.86746500 | -1.13576000 |
| O | 0.05204100  | -1.50446200 | -1.12679900 |
| C | 3.31764000  | -0.63352300 | -1.11261100 |
| O | 2.33999400  | -1.07167300 | -1.85914600 |
| O | 4.45337400  | -0.48920500 | -1.53194200 |
| H | -2.75924100 | 3.81160800  | 0.39278500  |
| C | -2.79727200 | -1.57150900 | 0.08267300  |
| H | -2.05193000 | -2.30098900 | 0.42648500  |
| C | -4.12671200 | -2.27134000 | -0.19907700 |
| H | -4.83555800 | -1.54284500 | -0.60914500 |
| H | -3.97457600 | -3.03506500 | -0.97127100 |
| H | -2.93600600 | -0.82852900 | 0.87714600  |
| C | -4.71203900 | -2.91272800 | 1.05665700  |
| H | -5.65851100 | -3.41557900 | 0.84161500  |
| H | -4.02287900 | -3.65479400 | 1.47316300  |
| H | -4.89887100 | -2.15874400 | 1.82823600  |
| H | 1.36295800  | -1.22835500 | -1.44634600 |
| H | -2.35092900 | -1.50890800 | -2.02201200 |
| F | -2.97839000 | 0.28589100  | -1.39572500 |

(R)-TS3<sub>0</sub>-F-P

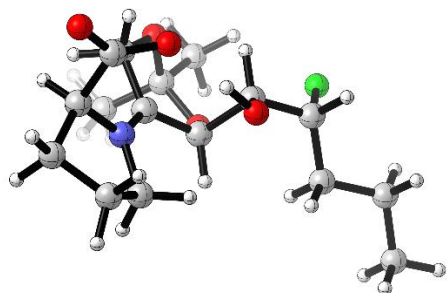

-----  
- Thermochemistry -  
-----

|                                              |                             |
|----------------------------------------------|-----------------------------|
| Zero-point correction=                       | 0.421605 (Hartree/Particle) |
| Thermal correction to Energy=                | 0.441332                    |
| Thermal correction to Enthalpy=              | 0.442197                    |
| Thermal correction to Gibbs Free Energy=     | 0.375586                    |
| Sum of electronic and zero-point Energies=   | -1155.245176                |
| Sum of electronic and thermal Energies=      | -1155.225449                |
| Sum of electronic and thermal Enthalpies=    | -1155.224584                |
| Sum of electronic and thermal Free Energies= | -1155.291196                |

Number of Imaginary Frequencies = 0

E (Single Point Energy) [IEFPCM<sub>(DCM)</sub>M06-2X/6-311++G(2d,2p)] = -1155.989945

|   |             |             |            |
|---|-------------|-------------|------------|
| C | -0.55515500 | 0.22780100  | 0.44184300 |
| H | -0.74068000 | -0.51153300 | 1.22456300 |
| C | 0.90513000  | 0.56374700  | 0.35529200 |
| N | 1.82011800  | -0.24814000 | 0.74339200 |
| C | 3.23231400  | -0.11487300 | 0.33871800 |
| H | 3.55443600  | 0.92529400  | 0.42563100 |
| C | 1.60624300  | -1.51877500 | 1.50364100 |
| H | 0.79937500  | -2.08732200 | 1.04523300 |
| H | 1.34111700  | -1.23661300 | 2.52668900 |
| C | 2.96581000  | -2.21391200 | 1.43033600 |
| H | 3.00848200  | -2.85482900 | 0.54468700 |

|   |             |             |             |
|---|-------------|-------------|-------------|
| H | 3.14110200  | -2.83143600 | 2.31170400  |
| C | 3.95972000  | -1.05725600 | 1.29383000  |
| H | 4.12313100  | -0.56807300 | 2.25892200  |
| H | 4.92154200  | -1.35464100 | 0.87707000  |
| C | 1.23673200  | 1.83731400  | -0.37367500 |
| H | 1.92147000  | 2.45205500  | 0.22653500  |
| H | 1.72874200  | 1.58980900  | -1.32041700 |
| O | -1.37974500 | 1.33730200  | 0.71152900  |
| O | 0.04964100  | 2.52517100  | -0.69107700 |
| C | -0.87122500 | 2.63682600  | 0.38092700  |
| C | -2.03821300 | 3.44379000  | -0.14272100 |
| H | -2.41498700 | 2.97599800  | -1.05407900 |
| H | -1.71816000 | 4.46634400  | -0.35428300 |
| C | -0.23848300 | 3.24876200  | 1.62692600  |
| H | 0.24315500  | 4.19804700  | 1.37816300  |
| H | 0.49836200  | 2.58332400  | 2.08610500  |
| H | -1.02225700 | 3.42939900  | 2.36486000  |
| C | -0.89013500 | -0.41882300 | -0.94497100 |
| H | -0.66611600 | 0.31175000  | -1.73443800 |
| C | -2.37122700 | -0.78859900 | -1.07423100 |
| O | -0.15334400 | -1.60373700 | -1.10134500 |
| C | 3.38892200  | -0.55788000 | -1.16909300 |
| O | 2.33471600  | -0.80744100 | -1.81174200 |
| O | 4.56365000  | -0.59249700 | -1.55623500 |
| H | -2.83295000 | 3.46276800  | 0.60559600  |
| C | -2.98646100 | -1.46129900 | 0.13507800  |
| H | -2.31827600 | -2.27729300 | 0.44292100  |
| C | -4.38417300 | -2.01359200 | -0.14316900 |

|   |             |             |             |
|---|-------------|-------------|-------------|
| H | -5.02956800 | -1.19914400 | -0.49029700 |
| H | -4.32572100 | -2.74204800 | -0.96115300 |
| H | -3.02984500 | -0.73695100 | 0.95861000  |
| C | -4.99711500 | -2.67000500 | 1.09167500  |
| H | -5.99454600 | -3.06370900 | 0.87893700  |
| H | -4.37474400 | -3.50006200 | 1.44209000  |
| H | -5.08729700 | -1.94981600 | 1.91146900  |
| H | 0.76028700  | -1.38227900 | -1.40384700 |
| H | -2.44547900 | -1.43612900 | -1.95589800 |
| F | -3.09742800 | 0.37159100  | -1.37228800 |

(S)-TS3<sub>0</sub>-F-Pre

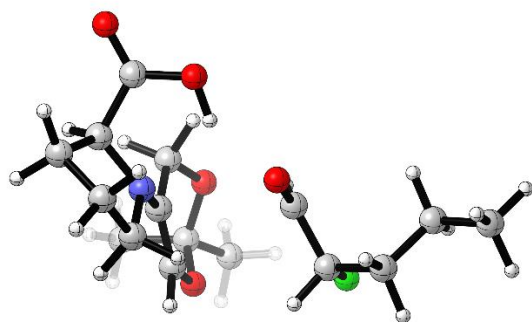

-----  
 - Thermochemistry -  
 -----

|                                              |                             |
|----------------------------------------------|-----------------------------|
| Zero-point correction=                       | 0.418012 (Hartree/Particle) |
| Thermal correction to Energy=                | 0.439302                    |
| Thermal correction to Enthalpy=              | 0.440167                    |
| Thermal correction to Gibbs Free Energy=     | 0.368238                    |
| Sum of electronic and zero-point Energies=   | -1155.232273                |
| Sum of electronic and thermal Energies=      | -1155.210983                |
| Sum of electronic and thermal Enthalpies=    | -1155.210118                |
| Sum of electronic and thermal Free Energies= | -1155.282047                |

Number of Imaginary Frequencies = 0

E (Single Point Energy) [IEFPCM(DCM)M06-2X/6-311++G(2d,2p)] = -1155.974910

|   |             |             |             |
|---|-------------|-------------|-------------|
| C | -0.46937300 | 1.35697900  | -1.26947400 |
| H | -0.25359500 | 1.01451800  | -2.27405600 |
| C | -1.17112700 | 0.65536200  | -0.36186800 |
| N | -1.65252400 | -0.63734400 | -0.58993800 |
| C | -2.89212400 | -1.08243000 | 0.04906600  |
| H | -3.55660100 | -0.25392000 | 0.31642300  |
| C | -1.51147200 | -1.21623700 | -1.92657400 |
| H | -0.45544700 | -1.41641600 | -2.13664700 |
| H | -1.89684800 | -0.52602300 | -2.69485900 |
| C | -2.37060900 | -2.47344400 | -1.84993900 |
| H | -1.82371300 | -3.27398800 | -1.34027900 |
| H | -2.67178600 | -2.83370700 | -2.83486600 |
| C | -3.55540100 | -1.99929000 | -1.00329500 |
| H | -4.23417500 | -1.39788900 | -1.61432900 |
| H | -4.12973100 | -2.80458100 | -0.54227200 |
| C | -1.32289800 | 1.21488600  | 1.03124800  |
| H | -2.34881500 | 1.55719000  | 1.23040800  |
| H | -1.07660400 | 0.44968600  | 1.77627700  |
| O | 0.09982900  | 2.57872900  | -1.00532800 |
| O | -0.39467800 | 2.26595900  | 1.23977600  |
| C | -0.35372600 | 3.21558600  | 0.18998800  |
| C | 0.70961800  | 4.22282600  | 0.56784700  |
| H | 0.86116800  | 4.92435200  | -0.25495800 |
| H | 1.64578900  | 3.69941900  | 0.77403600  |
| C | -1.71573500 | 3.85639400  | -0.05753700 |
| H | -2.42701500 | 3.14249000  | -0.47951700 |
| H | -1.60041800 | 4.68061000  | -0.76443400 |
| H | -2.11368400 | 4.24666900  | 0.88274200  |

|   |             |             |             |
|---|-------------|-------------|-------------|
| C | 1.56882500  | -0.45911300 | 0.27338600  |
| H | 1.29933900  | 0.33042000  | 0.99921500  |
| C | 2.69005800  | -0.11805400 | -0.68908000 |
| O | 1.01591400  | -1.53983500 | 0.25129800  |
| C | -2.63004500 | -1.86567900 | 1.34046800  |
| O | -1.37442200 | -2.22359700 | 1.58955900  |
| O | -3.53234800 | -2.17155100 | 2.08941000  |
| H | -0.75829300 | -1.87621300 | 0.90490800  |
| H | 0.39711800  | 4.77417300  | 1.45712400  |
| C | 3.78176000  | -1.17493800 | -0.72342800 |
| H | 4.51175800  | -0.88344400 | -1.48660000 |
| H | 2.25536600  | 0.03078500  | -1.68478600 |
| C | 4.47683800  | -1.37990900 | 0.62303400  |
| H | 3.74002700  | -1.69109800 | 1.37397900  |
| H | 3.31613700  | -2.10941900 | -1.05793500 |
| H | 4.89559500  | -0.42705900 | 0.96367600  |
| C | 5.58311300  | -2.42847000 | 0.52918200  |
| H | 5.17883300  | -3.39469100 | 0.21075900  |
| H | 6.34390400  | -2.12675500 | -0.19800000 |
| H | 6.07687800  | -2.57051900 | 1.49389200  |
| F | 3.21910100  | 1.10804100  | -0.28291100 |

(S)-TS3<sub>o</sub>-F

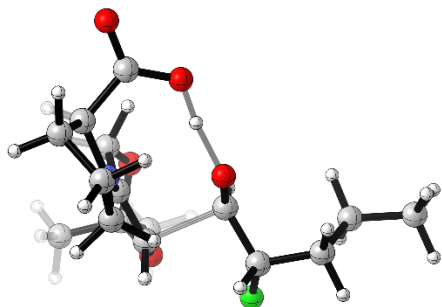

-----  
- Thermochemistry -  
-----

|                                              |                             |
|----------------------------------------------|-----------------------------|
| Zero-point correction=                       | 0.417146 (Hartree/Particle) |
| Thermal correction to Energy=                | 0.436769                    |
| Thermal correction to Enthalpy=              | 0.437634                    |
| Thermal correction to Gibbs Free Energy=     | 0.370957                    |
| Sum of electronic and zero-point Energies=   | -1155.220759                |
| Sum of electronic and thermal Energies=      | -1155.201136                |
| Sum of electronic and thermal Enthalpies=    | -1155.200271                |
| Sum of electronic and thermal Free Energies= | -1155.266948                |

Number of Imaginary Frequencies = 1

E (Single Point Energy) [IEFPCM(DCM)M06-2X/6-311++G(2d,2p)] = -1155.961139

|   |             |             |             |
|---|-------------|-------------|-------------|
| C | -0.24249000 | 1.02548600  | 0.98382400  |
| H | -0.34976300 | 0.71814500  | 2.01927400  |
| C | 0.95172700  | 0.81855000  | 0.29817300  |
| N | 1.80888100  | -0.14052700 | 0.64350000  |
| C | 3.00642700  | -0.48554200 | -0.12759000 |
| H | 3.52892800  | 0.41583200  | -0.46086800 |
| C | 1.74445100  | -0.85724700 | 1.93162300  |
| H | 0.74486400  | -1.26291300 | 2.08815600  |
| H | 1.98938800  | -0.15683800 | 2.74067700  |
| C | 2.80248600  | -1.94505800 | 1.77093700  |
| H | 2.36638600  | -2.80996000 | 1.26017400  |
| H | 3.20127700  | -2.27444900 | 2.73115000  |



|   |             |             |             |
|---|-------------|-------------|-------------|
| C | 3.85531300  | -1.27472300 | 0.88463100  |
| H | 4.45518700  | -0.57345900 | 1.47152100  |
| H | 4.52633300  | -1.97290400 | 0.38359200  |
| C | 1.18384000  | 1.56148900  | -0.99466200 |
| H | 2.09184100  | 2.17664100  | -0.90767200 |
| H | 1.32852100  | 0.85745500  | -1.82067600 |
| O | -1.05492400 | 2.09867300  | 0.66689400  |
| O | 0.06198300  | 2.34110700  | -1.34031100 |
| C | -0.51244500 | 3.04370200  | -0.25068500 |
| C | -1.68453100 | 3.81666500  | -0.81287500 |
| H | -2.23600900 | 4.29139500  | 0.00090000  |
| H | -2.34643900 | 3.13111000  | -1.34597300 |
| C | 0.50092800  | 3.94176900  | 0.45350400  |
| H | 1.25619600  | 3.36755700  | 0.99605600  |
| H | -0.02417200 | 4.57202500  | 1.17389300  |
| H | 0.99990000  | 4.58003800  | -0.28029600 |
| C | -1.13047000 | -0.64412400 | 0.06440900  |
| H | -1.41163900 | -0.00673900 | -0.78864100 |
| C | -2.23557800 | -0.91775300 | 1.07675000  |
| O | -0.32259500 | -1.61716300 | -0.08633600 |
| C | 2.74592300  | -1.31666300 | -1.40189300 |
| O | 1.54463500  | -1.76162700 | -1.65477800 |
| O | 3.69312700  | -1.52275700 | -2.14073300 |
| H | 0.76335700  | -1.61614300 | -0.94451500 |
| H | -1.32524000 | 4.58479500  | -1.50081400 |
| C | -3.18508500 | -1.99997400 | 0.57713400  |
| H | -3.95435400 | -2.13612300 | 1.34717300  |
| H | -1.78428500 | -1.22174800 | 2.02768200  |

|   |             |             |             |
|---|-------------|-------------|-------------|
| C | -3.84270500 | -1.68708000 | -0.76751900 |
| H | -3.07883000 | -1.65442500 | -1.55336800 |
| H | -2.61835400 | -2.93547600 | 0.51340500  |
| H | -4.30127800 | -0.69241300 | -0.72743200 |
| C | -4.89778400 | -2.73011900 | -1.13082100 |
| H | -4.45441600 | -3.72988400 | -1.18382300 |
| H | -5.69407500 | -2.75643300 | -0.37983000 |
| H | -5.35490700 | -2.51257400 | -2.09971800 |
| F | -2.96871500 | 0.24433900  | 1.31643800  |

(S)-TS3<sub>o</sub>-F-P

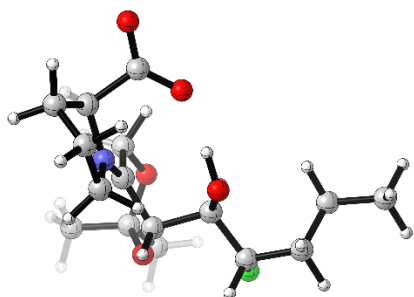

-----  
 - Thermochemistry -  
 -----

|                                              |                             |
|----------------------------------------------|-----------------------------|
| Zero-point correction=                       | 0.421632 (Hartree/Particle) |
| Thermal correction to Energy=                | 0.441327                    |
| Thermal correction to Enthalpy=              | 0.442192                    |
| Thermal correction to Gibbs Free Energy=     | 0.375469                    |
| Sum of electronic and zero-point Energies=   | -1155.244123                |
| Sum of electronic and thermal Energies=      | -1155.224428                |
| Sum of electronic and thermal Enthalpies=    | -1155.223563                |
| Sum of electronic and thermal Free Energies= | -1155.290286                |

Number of Imaginary Frequencies = 0

E (Single Point Energy) [IEFPCM(DCM)M06-2X/6-311++G(2d,2p)] = -1155.988743

|   |            |            |             |
|---|------------|------------|-------------|
| C | 0.32315100 | 0.78873200 | -0.93549700 |
| H | 0.14652200 | 0.59261300 | -1.99656400 |

|   |             |             |             |
|---|-------------|-------------|-------------|
| C | -0.95823600 | 0.76098900  | -0.15077300 |
| N | -2.00423300 | 0.13348500  | -0.54769200 |
| C | -3.11908200 | -0.21103900 | 0.35497500  |
| H | -3.37939500 | 0.64695200  | 0.97925100  |
| C | -2.20105700 | -0.49157100 | -1.89217200 |
| H | -1.31552200 | -1.06435000 | -2.15991800 |
| H | -2.35755500 | 0.32434500  | -2.60365100 |
| C | -3.45545700 | -1.34635100 | -1.71023300 |
| H | -3.17647300 | -2.35141600 | -1.38016300 |
| H | -4.01301400 | -1.43232200 | -2.64331500 |
| C | -4.23110100 | -0.62369200 | -0.60538300 |
| H | -4.73899500 | 0.26111400  | -1.00097100 |
| H | -4.95916100 | -1.25572700 | -0.09777600 |
| C | -0.88083700 | 1.38004700  | 1.21849600  |
| H | -1.70494900 | 2.09167000  | 1.36316000  |
| H | -0.96529100 | 0.59032100  | 1.97275400  |
| O | 0.98971600  | 2.02559500  | -0.85743200 |
| O | 0.37831900  | 1.98594100  | 1.39254600  |
| C | 0.78461700  | 2.82010800  | 0.32099100  |
| C | 2.12819600  | 3.39323000  | 0.71360000  |
| H | 2.54565200  | 3.94935700  | -0.12817300 |
| H | 2.80362700  | 2.57635900  | 0.97302500  |
| C | -0.24751500 | 3.89719300  | 0.00344400  |
| H | -1.16558400 | 3.47632800  | -0.41615100 |
| H | 0.17236300  | 4.57737600  | -0.74000700 |
| H | -0.49248700 | 4.46233700  | 0.90650700  |
| C | 1.16099800  | -0.40766500 | -0.36509000 |
| H | 1.32093400  | -0.25251900 | 0.71131400  |

|   |             |             |             |
|---|-------------|-------------|-------------|
| C | 2.53702700  | -0.48158000 | -1.03592200 |
| O | 0.47510500  | -1.60384500 | -0.62914500 |
| C | -2.67677300 | -1.39755300 | 1.29982000  |
| O | -1.47099200 | -1.75802800 | 1.24946500  |
| O | -3.59143300 | -1.83403200 | 2.00968600  |
| H | -0.22686400 | -1.73516400 | 0.05283400  |
| H | 2.01059400  | 4.06546500  | 1.56642400  |
| C | 3.24744900  | -1.80498700 | -0.81162000 |
| H | 4.23840800  | -1.71889200 | -1.27462700 |
| H | 2.45270900  | -0.26560500 | -2.10782100 |
| C | 3.39249400  | -2.19422400 | 0.65976900  |
| H | 2.39917700  | -2.36757600 | 1.08936800  |
| H | 2.70105500  | -2.58333200 | -1.35364000 |
| H | 3.84323600  | -1.36332700 | 1.21484800  |
| C | 4.24616500  | -3.44972300 | 0.82812100  |
| H | 3.80520100  | -4.29511800 | 0.28968900  |
| H | 5.25525900  | -3.29130900 | 0.43350200  |
| H | 4.33615600  | -3.73150700 | 1.88065200  |
| F | 3.32756300  | 0.53811300  | -0.48586900 |

(R)-TS3<sub>T</sub>-F-Pre

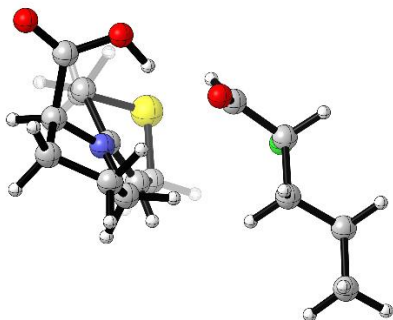

-----  
- Thermochemistry -  
-----

|                                              |                             |
|----------------------------------------------|-----------------------------|
| Zero-point correction=                       | 0.383228 (Hartree/Particle) |
| Thermal correction to Energy=                | 0.402669                    |
| Thermal correction to Enthalpy=              | 0.403534                    |
| Thermal correction to Gibbs Free Energy=     | 0.336396                    |
| Sum of electronic and zero-point Energies=   | -1363.741265                |
| Sum of electronic and thermal Energies=      | -1363.721824                |
| Sum of electronic and thermal Enthalpies=    | -1363.720959                |
| Sum of electronic and thermal Free Energies= | -1363.788097                |

Number of Imaginary Frequencies = 0

E (Single Point Energy) [IEFPCM(DCM)M06-2X/6-311++G(2d,2p)] = -1364.424353

|   |             |             |             |
|---|-------------|-------------|-------------|
| C | 0.33604700  | 0.95459000  | -1.34826300 |
| H | 0.81108400  | 0.13582300  | -1.88040400 |
| C | -0.86648300 | 0.74578400  | -0.76698300 |
| N | -1.42003300 | -0.53091700 | -0.68351100 |
| C | -2.85563100 | -0.76539000 | -0.55322300 |
| H | -3.46143500 | -0.04312300 | -1.10872100 |
| C | -0.74485100 | -1.67680200 | -1.29225800 |
| H | -0.63459000 | -1.53805700 | -2.37961800 |
| H | 0.25111900  | -1.79693500 | -0.85572800 |
| C | -1.68224400 | -2.83616400 | -0.97760000 |
| H | -1.53896400 | -3.68496300 | -1.64837000 |

|   |             |             |             |
|---|-------------|-------------|-------------|
| H | -1.52227200 | -3.17699300 | 0.05119800  |
| C | -3.05977900 | -2.18725100 | -1.12798400 |
| H | -3.31889500 | -2.10009500 | -2.18676700 |
| H | -3.86573500 | -2.72282500 | -0.62278700 |
| C | -1.64912200 | 1.83138100  | -0.05751200 |
| H | -2.70748400 | 1.76162100  | -0.33312300 |
| H | -1.59896200 | 1.66000700  | 1.02691800  |
| C | 1.07487400  | -0.05558100 | 1.52006000  |
| H | 0.71396100  | 0.98292000  | 1.62422200  |
| C | 2.56633100  | -0.21187500 | 1.31010600  |
| O | 0.33699300  | -1.01585900 | 1.62334800  |
| C | -3.34310500 | -0.71067400 | 0.89703200  |
| O | -2.43278500 | -0.84872800 | 1.85581400  |
| O | -4.51936700 | -0.59003900 | 1.16426000  |
| H | -1.51564000 | -0.89523300 | 1.50132700  |
| C | 2.94412500  | -1.22532600 | 0.24791900  |
| H | 2.58008000  | -0.85984800 | -0.72064300 |
| C | 4.44829500  | -1.48476700 | 0.18411300  |
| H | 2.40444400  | -2.15337100 | 0.47253600  |
| C | 4.80371000  | -2.48866300 | -0.91017800 |
| H | 5.88094200  | -2.67024600 | -0.94578300 |
| H | 4.30496500  | -3.44779500 | -0.73716300 |
| H | 4.49161600  | -2.12070400 | -1.89292500 |
| H | 4.78943700  | -1.85815100 | 1.15739200  |
| H | 4.97159400  | -0.53907000 | 0.00583100  |
| H | 3.00782400  | -0.48063900 | 2.28030300  |
| C | -1.18049600 | 3.24515400  | -0.37550300 |
| C | 1.11287600  | 2.24443700  | -1.37084600 |

|   |             |            |             |
|---|-------------|------------|-------------|
| H | -1.40346600 | 3.50482500 | -1.41516900 |
| H | -1.68709100 | 3.96487900 | 0.26995900  |
| H | 2.17048500  | 2.04078100 | -1.17921500 |
| H | 1.04726500  | 2.72969400 | -2.35203700 |
| S | 0.60276100  | 3.43522600 | -0.09565800 |
| F | 3.06886300  | 1.04713200 | 0.97369000  |

(R)-TS3<sub>T-F</sub>

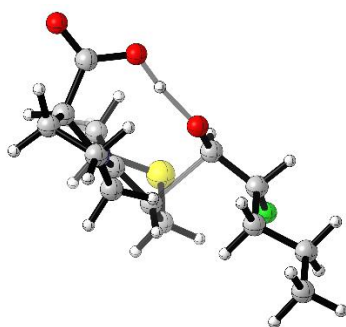

-----  
- Thermochemistry -  
-----

|                                              |                             |
|----------------------------------------------|-----------------------------|
| Zero-point correction=                       | 0.383005 (Hartree/Particle) |
| Thermal correction to Energy=                | 0.400864                    |
| Thermal correction to Enthalpy=              | 0.401729                    |
| Thermal correction to Gibbs Free Energy=     | 0.338235                    |
| Sum of electronic and zero-point Energies=   | -1363.730697                |
| Sum of electronic and thermal Energies=      | -1363.712837                |
| Sum of electronic and thermal Enthalpies=    | -1363.711972                |
| Sum of electronic and thermal Free Energies= | -1363.775467                |

Number of Imaginary Frequencies = 1

E (Single Point Energy) [IEFPCM(DCM)M06-2X/6-311++G(2d,2p)] = -1364.411768

|   |             |             |            |
|---|-------------|-------------|------------|
| C | -0.44261900 | 0.95073500  | 0.91582400 |
| H | -1.01752600 | 0.22219000  | 1.47924800 |
| C | 0.91311900  | 0.66559100  | 0.73466800 |
| N | 1.35650200  | -0.59635500 | 0.81961800 |
| C | 2.72263200  | -1.02838300 | 0.50119200 |

|   |             |             |             |
|---|-------------|-------------|-------------|
| H | 3.46354600  | -0.40812000 | 1.00973900  |
| C | 0.54415700  | -1.70871900 | 1.35177900  |
| H | 0.47318600  | -1.60890500 | 2.44281500  |
| H | -0.45462100 | -1.69042600 | 0.92044700  |
| C | 1.33086500  | -2.94610400 | 0.93812200  |
| H | 1.11881300  | -3.80316900 | 1.57897500  |
| H | 1.07777900  | -3.21026700 | -0.09414400 |
| C | 2.78155400  | -2.47402700 | 1.03278700  |
| H | 3.10587600  | -2.45403600 | 2.07709100  |
| H | 3.48757000  | -3.08172400 | 0.46515200  |
| C | 1.88813300  | 1.69700900  | 0.20818300  |
| H | 2.88717100  | 1.48862700  | 0.60071200  |
| H | 1.94776700  | 1.57963900  | -0.88320500 |
| C | -0.92301900 | 0.23017600  | -1.08584300 |
| H | -0.60334400 | 1.19810500  | -1.49842900 |
| C | -2.43385500 | 0.04810300  | -1.03213500 |
| O | -0.26070900 | -0.82336300 | -1.32722300 |
| C | 3.08392200  | -0.97747600 | -0.99417900 |
| O | 2.13173600  | -0.88456500 | -1.88709100 |
| O | 4.26079100  | -1.05210000 | -1.30129500 |
| H | 1.12729500  | -0.82949500 | -1.56694300 |
| C | -2.95772600 | -1.04727800 | -0.12947900 |
| H | -2.79069000 | -0.76303900 | 0.91703400  |
| C | -4.44276800 | -1.33582100 | -0.35088800 |
| H | -2.36528900 | -1.94826800 | -0.32933100 |
| C | -4.95684000 | -2.42484100 | 0.58780600  |
| H | -6.01743800 | -2.62746200 | 0.41749700  |
| H | -4.40648300 | -3.35970100 | 0.43949600  |



|   |             |             |             |
|---|-------------|-------------|-------------|
| H | -4.83506600 | -2.12666100 | 1.63430200  |
| H | -4.59777500 | -1.63975700 | -1.39325800 |
| H | -5.01678100 | -0.41473600 | -0.20103900 |
| H | -2.72229900 | -0.16167400 | -2.07301700 |
| C | 1.54153800  | 3.14354500  | 0.54411900  |
| C | -0.95651800 | 2.36447500  | 1.08830200  |
| H | 1.63456200  | 3.32617000  | 1.61910100  |
| H | 2.23084400  | 3.81355600  | 0.02762900  |
| H | -2.01900700 | 2.40778300  | 0.85224900  |
| H | -0.83634200 | 2.68940300  | 2.12868500  |
| S | -0.13777300 | 3.58275800  | 0.01986900  |
| F | -3.04143300 | 1.26562600  | -0.70696900 |

(R)-TS3<sub>T</sub>-F-P

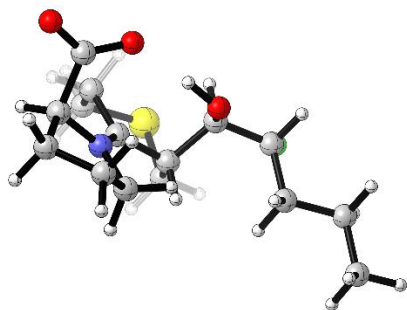

-----  
 - Thermochemistry -  
 -----

|                                              |                             |
|----------------------------------------------|-----------------------------|
| Zero-point correction=                       | 0.387574 (Hartree/Particle) |
| Thermal correction to Energy=                | 0.405468                    |
| Thermal correction to Enthalpy=              | 0.406333                    |
| Thermal correction to Gibbs Free Energy=     | 0.343195                    |
| Sum of electronic and zero-point Energies=   | -1363.758758                |
| Sum of electronic and thermal Energies=      | -1363.740865                |
| Sum of electronic and thermal Enthalpies=    | -1363.740000                |
| Sum of electronic and thermal Free Energies= | -1363.803138                |

Number of Imaginary Frequencies = 0

E (Single Point Energy) [IEFPCM(DCM)M06-2X/6-311++G(2d,2p)] = -1364.444298

|   |             |             |             |
|---|-------------|-------------|-------------|
| C | 0.57750600  | 0.50839400  | -0.56689200 |
| H | 0.84112100  | -0.33444200 | -1.20879900 |
| C | -0.92223500 | 0.62901500  | -0.50208100 |
| N | -1.66420200 | -0.39052800 | -0.78116000 |
| C | -3.10706200 | -0.47809400 | -0.45542100 |
| H | -3.63584800 | 0.39840600  | -0.82935800 |
| C | -1.16829700 | -1.71284800 | -1.27871200 |
| H | -0.96201000 | -1.60137400 | -2.34742200 |
| H | -0.26403000 | -1.99163900 | -0.74293000 |
| C | -2.33340000 | -2.66283600 | -1.01760500 |
| H | -2.32860900 | -3.49732500 | -1.71976000 |
| H | -2.26425300 | -3.06297200 | -0.00141400 |
| C | -3.55889500 | -1.76073000 | -1.15167000 |
| H | -3.77743000 | -1.56111900 | -2.20528100 |
| H | -4.45465400 | -2.15834900 | -0.67483300 |
| C | -1.51694800 | 1.89382200  | 0.05439500  |
| H | -2.59980600 | 1.90524500  | -0.06385900 |
| H | -1.31973400 | 1.87902400  | 1.13384500  |
| C | 1.02804300  | 0.15435500  | 0.89032700  |
| H | 0.83683000  | 1.02091300  | 1.53729100  |
| C | 2.51991600  | -0.17220300 | 1.00707500  |
| O | 0.35901600  | -0.99395800 | 1.35158500  |
| C | -3.29632200 | -0.54879300 | 1.10403100  |
| O | -2.26136000 | -0.49929500 | 1.82111000  |
| O | -4.48022400 | -0.64100200 | 1.45975200  |
| H | -0.58607200 | -0.79703000 | 1.56535500  |
| C | 3.05193700  | -1.18308600 | 0.01233100  |

|   |             |             |             |
|---|-------------|-------------|-------------|
| H | 3.03542100  | -0.74654000 | -0.99538600 |
| C | 4.47057100  | -1.64762800 | 0.34207900  |
| H | 2.36756900  | -2.04163900 | 0.01041100  |
| C | 4.99877100  | -2.64673600 | -0.68457700 |
| H | 6.01103200  | -2.97512100 | -0.43475400 |
| H | 4.35825300  | -3.53359700 | -0.73099400 |
| H | 5.02675300  | -2.20082000 | -1.68425100 |
| H | 4.47445500  | -2.10256100 | 1.33996100  |
| H | 5.13324600  | -0.77633100 | 0.38880500  |
| H | 2.68040900  | -0.52286500 | 2.03255100  |
| C | -0.93290300 | 3.17269600  | -0.55609800 |
| C | 1.25495100  | 1.74990800  | -1.16910800 |
| H | -1.16198900 | 3.23614000  | -1.62415900 |
| H | -1.38503200 | 4.03511000  | -0.06384600 |
| H | 2.33794000  | 1.63184300  | -1.12994900 |
| H | 0.96511000  | 1.84578300  | -2.22028500 |
| S | 0.85926000  | 3.29900100  | -0.31268700 |
| F | 3.24881200  | 1.02261900  | 0.87912600  |

(S)-TS3<sub>T</sub>-F-Pre

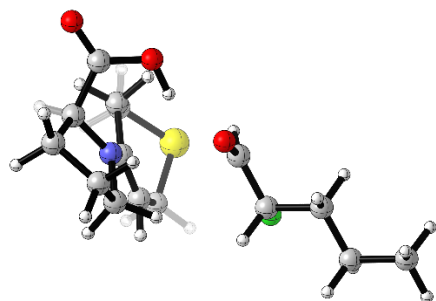

-----  
 - Thermochemistry -  
 -----

Zero-point correction=

0.383259 (Hartree/Particle)

|                                              |              |
|----------------------------------------------|--------------|
| Thermal correction to Energy=                | 0.402762     |
| Thermal correction to Enthalpy=              | 0.403627     |
| Thermal correction to Gibbs Free Energy=     | 0.335820     |
| Sum of electronic and zero-point Energies=   | -1363.740781 |
| Sum of electronic and thermal Energies=      | -1363.721278 |
| Sum of electronic and thermal Enthalpies=    | -1363.720413 |
| Sum of electronic and thermal Free Energies= | -1363.788219 |

Number of Imaginary Frequencies = 0

E (Single Point Energy) [IEFPCM<sub>(DCM)</sub>M06-2X/6-311++G(2d,2p)] = -1364.423886

|   |             |             |             |
|---|-------------|-------------|-------------|
| C | 0.20464500  | 1.31886400  | 1.37946600  |
| H | -0.17067100 | 0.69462200  | 2.18547700  |
| C | 1.21094800  | 0.85696000  | 0.60324500  |
| N | 1.66758900  | -0.45632100 | 0.70912300  |
| C | 3.01601300  | -0.85741700 | 0.31339500  |
| H | 3.76782100  | -0.08763900 | 0.51133500  |
| C | 1.12649800  | -1.35035000 | 1.73328600  |
| H | 1.30149600  | -0.94488800 | 2.74245000  |
| H | 0.04876100  | -1.47321400 | 1.59153800  |
| C | 1.90846900  | -2.63935200 | 1.51358600  |
| H | 1.90541500  | -3.28645500 | 2.39229600  |
| H | 1.48152200  | -3.19544800 | 0.67183400  |
| C | 3.30331600  | -2.11471000 | 1.16772300  |
| H | 3.82315500  | -1.80481500 | 2.07844500  |
| H | 3.93546000  | -2.83281400 | 0.64215700  |
| C | 1.82898700  | 1.65800700  | -0.52436800 |
| H | 2.91919600  | 1.54995200  | -0.50031800 |
| H | 1.49554000  | 1.23537800  | -1.48243600 |
| C | -1.28876400 | -0.27220300 | -0.76738200 |
| H | -1.04143100 | 0.67432100  | -1.28038100 |
| C | -2.55683100 | -0.27061800 | 0.05729500  |

|   |             |             |             |
|---|-------------|-------------|-------------|
| O | -0.61899500 | -1.27884000 | -0.89328700 |
| C | 3.13026800  | -1.19694300 | -1.17519900 |
| O | 2.00545700  | -1.45609100 | -1.83449400 |
| O | 4.20805100  | -1.27008200 | -1.72513000 |
| H | 1.20550100  | -1.31762300 | -1.27922700 |
| C | -3.64033200 | -1.11914200 | -0.59088000 |
| H | -3.23519700 | -2.13106600 | -0.70918900 |
| C | -4.92770100 | -1.15282400 | 0.23109700  |
| H | -3.84082200 | -0.72741900 | -1.59637100 |
| C | -6.00257800 | -2.00662100 | -0.43804000 |
| H | -6.91849200 | -2.02680400 | 0.15815800  |
| H | -6.25313300 | -1.61161900 | -1.42773100 |
| H | -5.65916100 | -3.03820600 | -0.56564700 |
| H | -5.29642000 | -0.13097000 | 0.36859600  |
| H | -4.70482900 | -1.54813300 | 1.22979200  |
| H | -2.33690200 | -0.61811800 | 1.07406800  |
| C | 1.51245400  | 3.14726500  | -0.48467300 |
| C | -0.46253300 | 2.66514400  | 1.27190900  |
| H | 2.01046000  | 3.62908900  | 0.36263500  |
| H | 1.85857000  | 3.63010600  | -1.40026600 |
| H | -1.53883700 | 2.55662900  | 1.42745800  |
| H | -0.08923800 | 3.35515900  | 2.03819100  |
| S | -0.27253800 | 3.45065400  | -0.35624400 |
| F | -2.99039300 | 1.05305400  | 0.15374600  |

(S)-TS3<sub>T</sub>-F

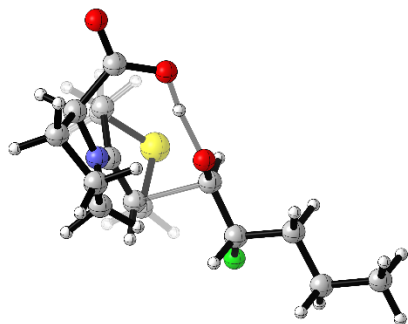

-----  
- Thermochemistry -  
-----

|                                              |                             |
|----------------------------------------------|-----------------------------|
| Zero-point correction=                       | 0.382864 (Hartree/Particle) |
| Thermal correction to Energy=                | 0.400862                    |
| Thermal correction to Enthalpy=              | 0.401727                    |
| Thermal correction to Gibbs Free Energy=     | 0.337760                    |
| Sum of electronic and zero-point Energies=   | -1363.731314                |
| Sum of electronic and thermal Energies=      | -1363.713316                |
| Sum of electronic and thermal Enthalpies=    | -1363.712451                |
| Sum of electronic and thermal Free Energies= | -1363.776417                |

Number of Imaginary Frequencies = 1

E (Single Point Energy) [IEFPCM(DCM)M06-2X/6-311++G(2d,2p)] = -1364.412197

|   |             |             |            |
|---|-------------|-------------|------------|
| C | -0.05927400 | 1.18178800  | 1.08340400 |
| H | -0.44005500 | 0.64011100  | 1.94564000 |
| C | 1.19452300  | 0.79823000  | 0.60101000 |
| N | 1.66001100  | -0.43742300 | 0.83262300 |
| C | 2.89349600  | -0.98964200 | 0.25999200 |
| H | 3.73690900  | -0.31127100 | 0.40485400 |
| C | 1.04167300  | -1.37280400 | 1.79361600 |
| H | 1.27444300  | -1.04301400 | 2.81456700 |
| H | -0.03726200 | -1.39978900 | 1.65771900 |
| C | 1.69890900  | -2.70515100 | 1.45691800 |
| H | 1.68040400  | -3.39887600 | 2.29867000 |

|   |             |             |             |
|---|-------------|-------------|-------------|
| H | 1.17560500  | -3.16505100 | 0.61204300  |
| C | 3.11409400  | -2.29257500 | 1.05345800  |
| H | 3.71162100  | -2.06928100 | 1.94176600  |
| H | 3.64553300  | -3.03803700 | 0.46038300  |
| C | 1.97454000  | 1.63759200  | -0.38863000 |
| H | 3.04537300  | 1.48039400  | -0.23126000 |
| H | 1.74589000  | 1.27031800  | -1.39862800 |
| C | -1.11900400 | 0.01724300  | -0.40124700 |
| H | -1.11028900 | 0.88651900  | -1.07675300 |
| C | -2.43335600 | -0.23575500 | 0.32363800  |
| O | -0.47067800 | -1.03296700 | -0.68707100 |
| C | 2.83718300  | -1.27143200 | -1.25244200 |
| O | 1.68019800  | -1.30922900 | -1.86492900 |
| O | 3.88707600  | -1.47656100 | -1.83501600 |
| H | 0.80960000  | -1.13248500 | -1.31051500 |
| C | -3.41791900 | -0.93288400 | -0.60299800 |
| H | -2.94861100 | -1.86269000 | -0.94251600 |
| C | -4.75580400 | -1.22884200 | 0.07375500  |
| H | -3.57153700 | -0.30200500 | -1.48883000 |
| C | -5.72447400 | -1.93619300 | -0.87184500 |
| H | -6.67737300 | -2.14647200 | -0.37890800 |
| H | -5.92964700 | -1.31836200 | -1.75207300 |
| H | -5.30691300 | -2.88644000 | -1.22010800 |
| H | -5.19977000 | -0.29272000 | 0.42829400  |
| H | -4.57934400 | -1.85194500 | 0.95951800  |
| H | -2.26050000 | -0.83230300 | 1.22686100  |
| C | 1.70185200  | 3.13533600  | -0.32288200 |
| C | -0.54802600 | 2.61406500  | 1.02514200  |

|   |             |            |             |
|---|-------------|------------|-------------|
| H | 2.06929700  | 3.55916100 | 0.61677300  |
| H | 2.21664800  | 3.63738500 | -1.14367900 |
| H | -1.63681400 | 2.63523500 | 1.05865600  |
| H | -0.18200000 | 3.17995000 | 1.88988700  |
| S | -0.06505200 | 3.50425400 | -0.48091400 |
| F | -2.99707700 | 0.97686300 | 0.73385400  |

(S)-TS3<sub>T</sub>-F-P

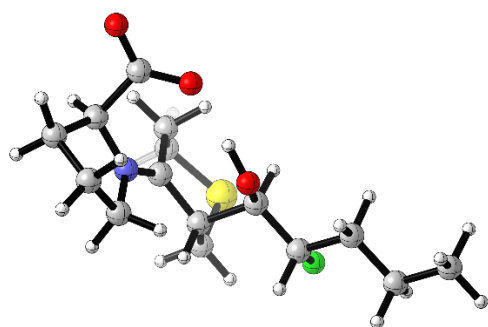

-----  
- Thermochemistry -  
-----

|                                              |                             |
|----------------------------------------------|-----------------------------|
| Zero-point correction=                       | 0.387679 (Hartree/Particle) |
| Thermal correction to Energy=                | 0.405559                    |
| Thermal correction to Enthalpy=              | 0.406424                    |
| Thermal correction to Gibbs Free Energy=     | 0.343139                    |
| Sum of electronic and zero-point Energies=   | -1363.757525                |
| Sum of electronic and thermal Energies=      | -1363.739645                |
| Sum of electronic and thermal Enthalpies=    | -1363.738780                |
| Sum of electronic and thermal Free Energies= | -1363.802065                |

Number of Imaginary Frequencies = 0

E (Single Point Energy) [IEFPCM<sub>(DCM)</sub>M06-2X/6-311++G(2d,2p)] = -1364.442999

|   |             |             |            |
|---|-------------|-------------|------------|
| C | -0.27833800 | 0.78098200  | 0.88311200 |
| H | -0.28149500 | 0.25921400  | 1.84340500 |
| C | 1.11367100  | 0.76798500  | 0.30581500 |
| N | 1.98137500  | -0.09455300 | 0.71800200 |
| C | 3.25165200  | -0.39304700 | 0.01648000 |



|   |             |             |             |
|---|-------------|-------------|-------------|
| H | 3.79938700  | 0.52600200  | -0.19046300 |
| C | 1.76683600  | -1.07438500 | 1.82959200  |
| H | 1.88431300  | -0.52882800 | 2.77070700  |
| H | 0.76778800  | -1.49694400 | 1.75634300  |
| C | 2.86988200  | -2.10919200 | 1.62620900  |
| H | 3.14897900  | -2.58035400 | 2.56935500  |
| H | 2.52586600  | -2.88716600 | 0.93778200  |
| C | 3.99957200  | -1.30003300 | 0.99136300  |
| H | 4.51562600  | -0.69868700 | 1.74629900  |
| H | 4.73324200  | -1.90636300 | 0.46035900  |
| C | 1.40449400  | 1.66798300  | -0.86421700 |
| H | 2.46041300  | 1.64285900  | -1.12987000 |
| H | 0.85632300  | 1.25260500  | -1.71907200 |
| C | -1.14602600 | -0.07970300 | -0.09886500 |
| H | -1.23163600 | 0.44274500  | -1.06251700 |
| C | -2.56786300 | -0.29159100 | 0.42892000  |
| O | -0.57341800 | -1.35492400 | -0.24768400 |
| C | 2.94414900  | -1.11021200 | -1.34910300 |
| O | 1.73485000  | -1.27454900 | -1.66230600 |
| O | 3.95883400  | -1.43351400 | -1.98355300 |
| H | 0.24634500  | -1.31882100 | -0.79917200 |
| C | -3.36111300 | -1.30531900 | -0.37009300 |
| H | -2.84109000 | -2.26561400 | -0.30553400 |
| C | -4.79960100 | -1.44840400 | 0.12622500  |
| H | -3.35098000 | -1.00329100 | -1.42605200 |
| C | -5.57400900 | -2.49270500 | -0.67545000 |
| H | -6.60146800 | -2.58985000 | -0.31451700 |
| H | -5.61375400 | -2.21854200 | -1.73471500 |

|   |             |             |             |
|---|-------------|-------------|-------------|
| H | -5.09568300 | -3.47487900 | -0.60277100 |
| H | -5.30754900 | -0.48041100 | 0.06255200  |
| H | -4.78812200 | -1.72999600 | 1.18700600  |
| H | -2.54802100 | -0.56198200 | 1.49366300  |
| C | 0.97843000  | 3.12401400  | -0.64171400 |
| C | -0.78142500 | 2.20713800  | 1.15859600  |
| H | 1.54772900  | 3.57640600  | 0.17595400  |
| H | 1.18441500  | 3.69276400  | -1.54978800 |
| H | -1.79958500 | 2.17060800  | 1.54361000  |
| H | -0.14901100 | 2.66731500  | 1.92428000  |
| S | -0.79576500 | 3.28116000  | -0.30267800 |
| F | -3.23148900 | 0.94637200  | 0.34745700  |

**Supplementary Table 12.** Energies for enamine addition to 2-bromopentanal. Reported energies for structures optimized at the IEFPCM<sub>(DCM)</sub>M06-2X/6-311++G(2d,2p)//IEFPCM<sub>(DCM)</sub>M06-2X/6-31+G(d,p) level of theory represent the sum of the thermal correction to Gibbs Free Energy computed at the IEFPCM<sub>(DCM)</sub>M06-2X/6-31+G(d,p) level of theory and single point energies computed at the IEFPCM<sub>(DCM)</sub>M06-2X/6-311++G(2d,2p). All energies are reported in Hartrees.

| Structure                                 | Single Point Energies, E<br>IEFPCM <sub>(DCM)</sub> M06-2X/6-311++G(2d,2p) | Thermal Corrections to Gibbs Free Energies,<br>IEFPCM <sub>(DCM)</sub> M06-2X/6-31+G(d,p) | Gibbs Free Energies (G),<br>IEFPCM <sub>(DCM)</sub> M06-2X/6-31+G(d,p) | Gibbs Free Energies (G),<br>IEFPCM <sub>(DCM)</sub> M06-2X/6-311++G(2d,2p)//<br>IEFPCM <sub>(DCM)</sub> M06-2X/6-31+G(d,p) |
|-------------------------------------------|----------------------------------------------------------------------------|-------------------------------------------------------------------------------------------|------------------------------------------------------------------------|----------------------------------------------------------------------------------------------------------------------------|
| 2-Bromopentanal                           | -2845.302023                                                               | 0.102041                                                                                  | -2842.756584                                                           | -2845.199982                                                                                                               |
| Enamine of Cyclohexanone (G)              | -634.55147535                                                              | 0.238392                                                                                  | -634.142903                                                            | -634.3130834                                                                                                               |
| Enamine of Dioxane (O)                    | -784.98483791                                                              | 0.244077                                                                                  | -784.522619                                                            | -784.7407609                                                                                                               |
| Enamine of Tetrahydro-4H-thiopyranone (T) | -993.43210840                                                              | 0.210205                                                                                  | -993.028735                                                            | -993.2219034                                                                                                               |
| Enamine of Tetrahydro-4H-pyranone (P)     | -670.45469021                                                              | 0.214793                                                                                  | -670.055312                                                            | -670.2398972                                                                                                               |
| (R)-TS3 <sub>p</sub> -Br-Pre              | -3515.772666                                                               | 0.336557                                                                                  | -3512.81573                                                            | -3515.436109                                                                                                               |
| (R)-TS3 <sub>p</sub> -Br                  | -3515.75725                                                                | 0.339631                                                                                  | -3512.79908                                                            | -3515.417619                                                                                                               |
| (R)-TS3 <sub>p</sub> -Br-P                | -3515.792008                                                               | 0.344841                                                                                  | -3512.828515                                                           | -3515.447167                                                                                                               |
| (S)-TS3 <sub>p</sub> -Br-Pre              | -3515.773353                                                               | 0.336644                                                                                  | -3512.81529                                                            | -3515.436709                                                                                                               |
| (S)-TS3 <sub>p</sub> -Br                  | -3515.757188                                                               | 0.339054                                                                                  | -3512.798467                                                           | -3515.418134                                                                                                               |
| (S)-TS3 <sub>p</sub> -Br-P                | -3515.788684                                                               | 0.343919                                                                                  | -3512.825136                                                           | -3515.444765                                                                                                               |
| (R)-TS3 <sub>G</sub> -Br-Pre              | -3479.870365                                                               | 0.360779                                                                                  | -3476.903726                                                           | -3479.509586                                                                                                               |
| (R)-TS3 <sub>G</sub> -Br                  | -3479.854643                                                               | 0.364378                                                                                  | -3476.886609                                                           | -3479.490265                                                                                                               |
| (R)-TS3 <sub>G</sub> -Br-P                | -3479.885557                                                               | 0.368487                                                                                  | -3476.913388                                                           | -3479.51707                                                                                                                |
| (S)-TS3 <sub>G</sub> -Br-Pre              | -3479.868737                                                               | 0.358896                                                                                  | -3476.903929                                                           | -3479.509841                                                                                                               |
| (S)-TS3 <sub>G</sub> -Br                  | -3479.854911                                                               | 0.363619                                                                                  | -3476.886337                                                           | -3479.491292                                                                                                               |
| (S)-TS3 <sub>G</sub> -Br-P                | -3479.88184                                                                | 0.366119                                                                                  | -3476.910799                                                           | -3479.515721                                                                                                               |
| (R)-TS3 <sub>O</sub> -Br-Pre              | -3630.303915                                                               | 0.365694                                                                                  | -3627.284499                                                           | -3629.938221                                                                                                               |
| (R)-TS3 <sub>O</sub> -Br                  | -3630.286244                                                               | 0.36793                                                                                   | -3627.26738                                                            | -3629.918314                                                                                                               |

|                                               |              |          |              |              |
|-----------------------------------------------|--------------|----------|--------------|--------------|
| ( <i>R</i> )- <b>TS3</b> <sub>O</sub> -Br-P   | -3630.315445 | 0.37229  | -3627.291794 | -3629.943146 |
| ( <i>S</i> )- <b>TS3</b> <sub>O</sub> -Br-Pre | -3630.301967 | 0.36445  | -3627.284609 | -3629.937517 |
| ( <i>S</i> )- <b>TS3</b> <sub>O</sub> -Br     | -3630.285366 | 0.36805  | -3627.265946 | -3629.917315 |
| ( <i>S</i> )- <b>TS3</b> <sub>O</sub> -Br-P   | -3630.313357 | 0.373188 | -3627.290085 | -3629.940169 |
| ( <i>R</i> )- <b>TS3</b> <sub>T</sub> -Br-Pre | -3838.751494 | 0.33315  | -3835.789332 | -3838.418344 |
| ( <i>R</i> )- <b>TS3</b> <sub>T</sub> -Br     | -3838.736601 | 0.33612  | -3835.773702 | -3838.400481 |
| ( <i>R</i> )- <b>TS3</b> <sub>T</sub> -Br-P   | -3838.769308 | 0.340446 | -3835.801764 | -3838.428862 |
| ( <i>S</i> )- <b>TS3</b> <sub>T</sub> -Br-Pre | -3838.74956  | 0.333301 | -3835.787541 | -3838.416259 |
| ( <i>S</i> )- <b>TS3</b> <sub>T</sub> -Br     | -3838.734863 | 0.335584 | -3835.772793 | -3838.399279 |
| ( <i>S</i> )- <b>TS3</b> <sub>T</sub> -Br-P   | -3838.765953 | 0.33997  | -3835.798642 | -3838.425983 |

Pre – Precomplex

P – Product

(*R*)-**TS3**<sub>P</sub>-Br-Pre

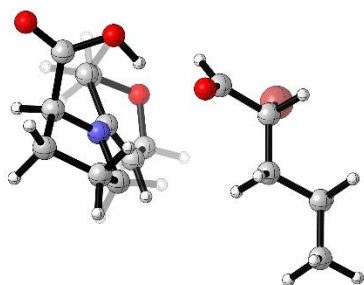

-----  
- Thermochemistry -  
-----

|                                              |                             |
|----------------------------------------------|-----------------------------|
| Zero-point correction=                       | 0.385072 (Hartree/Particle) |
| Thermal correction to Energy=                | 0.404566                    |
| Thermal correction to Enthalpy=              | 0.405431                    |
| Thermal correction to Gibbs Free Energy=     | 0.336557                    |
| Sum of electronic and zero-point Energies=   | -3512.767216                |
| Sum of electronic and thermal Energies=      | -3512.747721                |
| Sum of electronic and thermal Enthalpies=    | -3512.746856                |
| Sum of electronic and thermal Free Energies= | -3512.81573                 |

Number of Imaginary Frequencies = 0

E (Single Point Energy) [IEFPCM<sub>(DCM)</sub>M06-2X/6-311++G(2d,2p)] = -3515.772666

|   |             |             |             |
|---|-------------|-------------|-------------|
| C | 0.13692600  | -0.69470600 | -1.67490500 |
| H | -0.16286800 | 0.21915500  | -2.17761300 |
| C | 1.26288700  | -0.74685400 | -0.93307200 |
| N | 2.02254100  | 0.37716900  | -0.62748600 |
| C | 3.45168500  | 0.29604200  | -0.33825900 |
| H | 3.96263300  | -0.47891800 | -0.91812600 |
| C | 1.66114500  | 1.67911600  | -1.18508600 |
| H | 1.67034900  | 1.65320200  | -2.28659600 |
| H | 0.65555800  | 1.95733300  | -0.85465700 |
| C | 2.75382000  | 2.59443400  | -0.64604100 |
| H | 2.86212000  | 3.50991900  | -1.23004600 |
| H | 2.53215000  | 2.86926400  | 0.39096700  |
| C | 3.99189300  | 1.69620700  | -0.71863100 |
| H | 4.36590700  | 1.65735700  | -1.74531700 |
| H | 4.81152500  | 2.01116500  | -0.06998000 |
| C | 1.68699100  | -2.04635900 | -0.28682700 |
| H | 2.75486400  | -2.23265500 | -0.44624300 |
| H | 1.53749200  | -1.98443900 | 0.80010000  |
| C | -0.70030000 | 0.14391800  | 1.33706800  |
| H | -0.48572700 | -0.93732900 | 1.38127400  |
| C | -2.13367600 | 0.56585700  | 1.07487600  |
| O | 0.15655500  | 0.97857700  | 1.53889700  |
| C | 3.74961300  | -0.00210000 | 1.13292000  |
| O | 2.78381600  | 0.23995200  | 2.01351100  |
| O | 4.83741600  | -0.40015700 | 1.49035700  |
| H | 1.94409700  | 0.51633100  | 1.58037600  |

|    |             |             |             |
|----|-------------|-------------|-------------|
| C  | -2.25893000 | 1.60578100  | -0.02991000 |
| H  | -1.94648400 | 1.15773900  | -0.98045600 |
| C  | -3.65538900 | 2.20797000  | -0.15770700 |
| H  | -1.53789100 | 2.39723600  | 0.21390900  |
| C  | -3.67950600 | 3.35659900  | -1.16339300 |
| H  | -4.68546100 | 3.77224100  | -1.26261400 |
| H  | -3.00904600 | 4.16421700  | -0.85316800 |
| H  | -3.35852600 | 3.01371000  | -2.15245800 |
| H  | -3.98302700 | 2.56566500  | 0.82635200  |
| H  | -4.36156900 | 1.42826900  | -0.46192400 |
| H  | -2.53138400 | 0.95790400  | 2.01634100  |
| C  | 0.89543400  | -3.21608500 | -0.86390300 |
| C  | -0.74065600 | -1.90243500 | -1.87697300 |
| H  | 1.25937000  | -3.45392400 | -1.87505400 |
| H  | 1.00420800  | -4.10389000 | -0.23849500 |
| H  | -1.79484100 | -1.63314100 | -1.76999800 |
| H  | -0.60394000 | -2.31990300 | -2.88906800 |
| O  | -0.48679900 | -2.91319800 | -0.91706800 |
| Br | -3.19762400 | -1.02321100 | 0.69623900  |

(R)-TS3p-Br

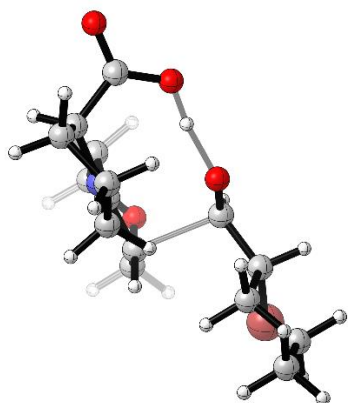

-----  
- Thermochemistry -  
-----

|                                              |                             |
|----------------------------------------------|-----------------------------|
| Zero-point correction=                       | 0.385067 (Hartree/Particle) |
| Thermal correction to Energy=                | 0.402946                    |
| Thermal correction to Enthalpy=              | 0.403811                    |
| Thermal correction to Gibbs Free Energy=     | 0.339631                    |
| Sum of electronic and zero-point Energies=   | -3512.753644                |
| Sum of electronic and thermal Energies=      | -3512.735766                |
| Sum of electronic and thermal Enthalpies=    | -3512.734901                |
| Sum of electronic and thermal Free Energies= | -3512.799080                |

Number of Imaginary Frequencies = 1

E (Single Point Energy) [IEFPCM<sub>(DCM)</sub>M06-2X/6-311++G(2d,2p)] = -3515.757250

|   |             |             |            |
|---|-------------|-------------|------------|
| C | -0.05382400 | 1.04388800  | 0.98471500 |
| H | -0.55911400 | 0.30890800  | 1.60601300 |
| C | 1.31270700  | 0.88607700  | 0.73561000 |
| N | 1.91427400  | -0.30382700 | 0.79226800 |
| C | 3.31260200  | -0.55510500 | 0.42306400 |
| H | 3.98144900  | 0.15715100  | 0.91129600 |
| C | 1.27799800  | -1.50069500 | 1.36813500 |
| H | 1.25436500  | -1.40322300 | 2.46140400 |
| H | 0.26233500  | -1.59891400 | 0.99451100 |

|   |             |             |             |
|---|-------------|-------------|-------------|
| C | 2.18960500  | -2.63308000 | 0.91287200  |
| H | 2.11620300  | -3.50903500 | 1.55884900  |
| H | 1.92443300  | -2.92780100 | -0.10817300 |
| C | 3.57377600  | -1.98301000 | 0.94423600  |
| H | 3.93944900  | -1.92300300 | 1.97309500  |
| H | 4.32350800  | -2.49808700 | 0.34247200  |
| C | 2.09495200  | 2.03977900  | 0.15420700  |
| H | 3.13654000  | 2.01236900  | 0.48442500  |
| H | 2.09813400  | 1.93453000  | -0.93972500 |
| C | -0.60298800 | 0.25128900  | -0.96790600 |
| H | -0.56569600 | 1.28039800  | -1.35323400 |
| C | -2.00683600 | -0.34638700 | -0.82556800 |
| O | 0.25776900  | -0.60633500 | -1.32243000 |
| C | 3.61998800  | -0.45481800 | -1.08172600 |
| O | 2.63824100  | -0.43309700 | -1.94854100 |
| O | 4.78802700  | -0.42238800 | -1.42416100 |
| H | 1.65621900  | -0.45761200 | -1.59738300 |
| C | -2.11313000 | -1.60355500 | 0.01786800  |
| H | -1.97653900 | -1.35369400 | 1.07758700  |
| C | -3.42021400 | -2.37246000 | -0.16710200 |
| H | -1.27682800 | -2.24409600 | -0.28955800 |
| C | -3.38441800 | -3.71905800 | 0.55207800  |
| H | -4.32705300 | -4.25851100 | 0.42847200  |
| H | -2.57992000 | -4.35057200 | 0.16185100  |
| H | -3.21421500 | -3.58260100 | 1.62519500  |
| H | -3.59428300 | -2.52665000 | -1.23935500 |
| H | -4.25638300 | -1.77163000 | 0.20535200  |
| H | -2.29885400 | -0.57521500 | -1.85622200 |



|    |             |            |             |
|----|-------------|------------|-------------|
| C  | 1.47703800  | 3.38126000 | 0.53004100  |
| C  | -0.57597600 | 2.46465800 | 1.12714400  |
| H  | 1.65444500  | 3.59966000 | 1.59359100  |
| H  | 1.91549200  | 4.18237000 | -0.06687500 |
| H  | -1.63068600 | 2.52178600 | 0.87227100  |
| H  | -0.46137100 | 2.80056300 | 2.17118200  |
| O  | 0.08910800  | 3.37354600 | 0.26998500  |
| Br | -3.35183900 | 0.96066300 | -0.26879300 |

(*R*)-TS3<sub>p</sub>-Br-P

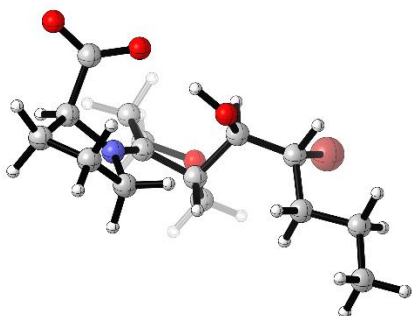

-----  
 - Thermochemistry -  
 -----

|                                              |                             |
|----------------------------------------------|-----------------------------|
| Zero-point correction=                       | 0.389626 (Hartree/Particle) |
| Thermal correction to Energy=                | 0.407435                    |
| Thermal correction to Enthalpy=              | 0.408300                    |
| Thermal correction to Gibbs Free Energy=     | 0.344841                    |
| Sum of electronic and zero-point Energies=   | -3512.783729                |
| Sum of electronic and thermal Energies=      | -3512.765921                |
| Sum of electronic and thermal Enthalpies=    | -3512.765056                |
| Sum of electronic and thermal Free Energies= | -3512.828515                |

Number of Imaginary Frequencies = 0

E (Single Point Energy) [IEFPCM(DCM)M06-2X/6-311++G(2d,2p)] = -3515.792008

|   |             |             |             |
|---|-------------|-------------|-------------|
| C | -0.09166900 | -0.22464300 | -0.83228300 |
| H | -0.20428800 | 0.73685300  | -1.33664300 |

|   |             |             |             |
|---|-------------|-------------|-------------|
| C | 1.36038900  | -0.58353200 | -0.70352700 |
| N | 2.28279500  | 0.31605000  | -0.74149000 |
| C | 3.67494100  | 0.08004000  | -0.29915500 |
| H | 4.08681700  | -0.80407000 | -0.78590500 |
| C | 2.06245500  | 1.76875100  | -1.01770200 |
| H | 1.95788200  | 1.88062500  | -2.10112300 |
| H | 1.16052000  | 2.10537700  | -0.51152300 |
| C | 3.33327300  | 2.43320300  | -0.49506000 |
| H | 3.54144400  | 3.36320500  | -1.02521900 |
| H | 3.22314600  | 2.65737400  | 0.57034000  |
| C | 4.40290600  | 1.36097800  | -0.70499000 |
| H | 4.69747000  | 1.31050900  | -1.75784700 |
| H | 5.29524700  | 1.50320600  | -0.09551700 |
| C | 1.65215200  | -2.02187600 | -0.39751800 |
| H | 2.70160300  | -2.27346000 | -0.55004800 |
| H | 1.43509600  | -2.17060200 | 0.66768700  |
| C | -0.60385300 | -0.07173200 | 0.64145400  |
| H | -0.52492500 | -1.04215900 | 1.14647500  |
| C | -2.05707200 | 0.41424400  | 0.75353100  |
| O | 0.15986500  | 0.90698000  | 1.30761400  |
| C | 3.70059300  | -0.14662000 | 1.25690000  |
| O | 2.60115100  | -0.10787700 | 1.87203600  |
| O | 4.83552500  | -0.34562200 | 1.71335400  |
| H | 1.04670100  | 0.54282100  | 1.55440700  |
| C | -2.45114900 | 1.50463700  | -0.22489500 |
| H | -2.50622300 | 1.09700200  | -1.24214800 |
| C | -3.75782500 | 2.21645900  | 0.11601900  |
| H | -1.63349700 | 2.24101400  | -0.21224500 |

|    |             |             |             |
|----|-------------|-------------|-------------|
| C  | -4.01090000 | 3.39912800  | -0.81611800 |
| H  | -4.95402800 | 3.89704400  | -0.57674000 |
| H  | -3.20875000 | 4.13984200  | -0.73688600 |
| H  | -4.06130600 | 3.06772700  | -1.85859800 |
| H  | -3.71543000 | 2.56130100  | 1.15635800  |
| H  | -4.58737000 | 1.50408200  | 0.05190100  |
| H  | -2.17858900 | 0.75976500  | 1.78107800  |
| C  | 0.76184500  | -2.95177200 | -1.23582700 |
| C  | -0.81334300 | -1.29570000 | -1.66575600 |
| H  | 1.07906500  | -2.93245300 | -2.28826600 |
| H  | 0.84979500  | -3.97255900 | -0.86343400 |
| H  | -1.88750800 | -1.11502200 | -1.67218500 |
| H  | -0.44889300 | -1.24876700 | -2.70275900 |
| O  | -0.59976600 | -2.58678300 | -1.13890400 |
| Br | -3.31697800 | -1.09268500 | 0.63702900  |

(S)-TS3<sub>P</sub>-Br-Pre

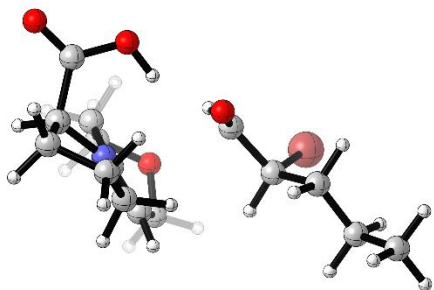

-----  
 - Thermochemistry -  
 -----

|                                            |                             |
|--------------------------------------------|-----------------------------|
| Zero-point correction=                     | 0.385021 (Hartree/Particle) |
| Thermal correction to Energy=              | 0.404512                    |
| Thermal correction to Enthalpy=            | 0.405377                    |
| Thermal correction to Gibbs Free Energy=   | 0.336644                    |
| Sum of electronic and zero-point Energies= | -3512.766914                |
| Sum of electronic and thermal Energies=    | -3512.747422                |

Sum of electronic and thermal Enthalpies= -3512.746557  
Sum of electronic and thermal Free Energies= -3512.815290

Number of Imaginary Frequencies = 0

E (Single Point Energy) [IEFPCM(DCM)M06-2X/6-311++G(2d,2p)] = -3515.773353

|   |             |             |             |
|---|-------------|-------------|-------------|
| C | 0.44403000  | 0.91209100  | 1.75795300  |
| H | 0.16444900  | 0.07887200  | 2.39544400  |
| C | 1.49619900  | 0.82657500  | 0.91612700  |
| N | 2.17554800  | -0.36006500 | 0.67649900  |
| C | 3.55105900  | -0.39728300 | 0.19007200  |
| H | 4.16677900  | 0.41547900  | 0.58695900  |
| C | 1.82721600  | -1.57378600 | 1.41395800  |
| H | 1.96158000  | -1.42818200 | 2.49732200  |
| H | 0.78011700  | -1.83478300 | 1.22726900  |
| C | 2.81219600  | -2.60010900 | 0.86583700  |
| H | 2.95748800  | -3.44482400 | 1.54119200  |
| H | 2.45502100  | -2.98419500 | -0.09593100 |
| C | 4.08248100  | -1.76551000 | 0.68019600  |
| H | 4.57914800  | -1.62008800 | 1.64344600  |
| H | 4.80490200  | -2.19926900 | -0.01373500 |
| C | 1.90008200  | 2.01826700  | 0.07848300  |
| H | 2.97865400  | 2.19640200  | 0.15155300  |
| H | 1.68422200  | 1.81878600  | -0.98035100 |
| C | -0.72891500 | -0.15189200 | -0.84556600 |
| H | -0.44013600 | 0.88506100  | -1.08421700 |
| C | -2.03883400 | -0.32178200 | -0.10191100 |
| O | -0.04026800 | -1.09867600 | -1.16634400 |
| C | 3.65510700  | -0.30660800 | -1.33479800 |
| O | 2.57085200  | -0.60053300 | -2.04678900 |

|    |             |             |             |
|----|-------------|-------------|-------------|
| O  | 4.69965800  | -0.02127300 | -1.87896500 |
| H  | 1.78414000  | -0.77515100 | -1.48397000 |
| C  | -2.63296300 | -1.71218600 | -0.21236600 |
| H  | -1.84404800 | -2.40900400 | 0.09940900  |
| C  | -3.87368200 | -1.92051900 | 0.65140600  |
| H  | -2.85187500 | -1.93070000 | -1.26413000 |
| C  | -4.34670400 | -3.37169800 | 0.61724900  |
| H  | -5.24546100 | -3.50897100 | 1.22392300  |
| H  | -4.58121700 | -3.68012100 | -0.40668000 |
| H  | -3.57356800 | -4.04495700 | 1.00108200  |
| H  | -4.67449400 | -1.25901600 | 0.30374500  |
| H  | -3.64781500 | -1.62551200 | 1.68406600  |
| H  | -1.87857700 | -0.04055800 | 0.94167900  |
| C  | 1.16117200  | 3.27040500  | 0.53908400  |
| C  | -0.42138800 | 2.14457900  | 1.82615500  |
| H  | 1.58705000  | 3.63655700  | 1.48516700  |
| H  | 1.23814200  | 4.06309100  | -0.20686600 |
| H  | -1.48498500 | 1.87795700  | 1.81214200  |
| H  | -0.24325200 | 2.70651000  | 2.75804600  |
| O  | -0.21853600 | 2.99850100  | 0.71466500  |
| Br | -3.23774500 | 1.05999000  | -0.79382500 |

(S)-TS3<sub>p</sub>-Br

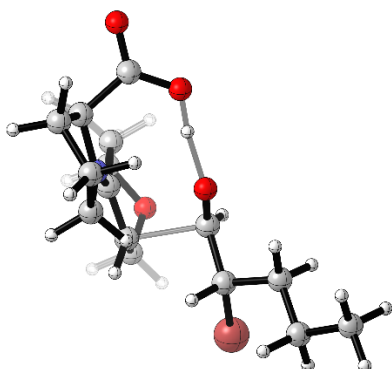

-----  
- Thermochemistry -  
-----

|                                              |                             |
|----------------------------------------------|-----------------------------|
| Zero-point correction=                       | 0.384719 (Hartree/Particle) |
| Thermal correction to Energy=                | 0.402687                    |
| Thermal correction to Enthalpy=              | 0.403553                    |
| Thermal correction to Gibbs Free Energy=     | 0.339054                    |
| Sum of electronic and zero-point Energies=   | -3512.752802                |
| Sum of electronic and thermal Energies=      | -3512.734833                |
| Sum of electronic and thermal Enthalpies=    | -3512.733968                |
| Sum of electronic and thermal Free Energies= | -3512.798467                |

Number of Imaginary Frequencies = 1

E (Single Point Energy) [IEFPCM<sub>(DCM)</sub>M06-2X/6-311++G(2d,2p)] = -3515.757188

|   |             |             |            |
|---|-------------|-------------|------------|
| C | 0.23501800  | 1.38801200  | 0.79532000 |
| H | -0.20565900 | 0.96697600  | 1.69586100 |
| C | 1.54173900  | 1.01980300  | 0.46163200 |
| N | 2.06407400  | -0.14716400 | 0.84180600 |
| C | 3.37867400  | -0.64965400 | 0.42539100 |
| H | 4.15438600  | 0.10354600  | 0.58050500 |
| C | 1.42903700  | -1.03426500 | 1.83484600 |
| H | 1.55725600  | -0.60197900 | 2.83549900 |
| H | 0.36826800  | -1.14140000 | 1.61899900 |
| C | 2.19584900  | -2.34053400 | 1.67166800 |

|   |             |             |             |
|---|-------------|-------------|-------------|
| H | 2.14979600  | -2.96192500 | 2.56701900  |
| H | 1.77859000  | -2.90461600 | 0.83092800  |
| C | 3.61203600  | -1.86204000 | 1.34900900  |
| H | 4.11300800  | -1.52220400 | 2.25972000  |
| H | 4.24027200  | -2.61464400 | 0.87108500  |
| C | 2.30613500  | 1.83873300  | -0.55046900 |
| H | 3.37919600  | 1.81400200  | -0.34314700 |
| H | 2.15533000  | 1.39047600  | -1.54204200 |
| C | -0.66072600 | 0.01034100  | -0.60775200 |
| H | -0.74950300 | 0.82913000  | -1.33757100 |
| C | -1.95583300 | -0.41524100 | 0.09463200  |
| O | 0.12838300  | -0.95785800 | -0.81165300 |
| C | 3.48177200  | -1.05669200 | -1.05589100 |
| O | 2.39360800  | -1.20002300 | -1.77173500 |
| O | 4.59099800  | -1.25485700 | -1.51657600 |
| H | 1.47548000  | -1.02289700 | -1.31679100 |
| C | -2.64444600 | -1.51271900 | -0.71511100 |
| H | -1.89294900 | -2.29749200 | -0.85805400 |
| C | -3.87767900 | -2.10996100 | -0.04120100 |
| H | -2.89884300 | -1.12060100 | -1.70790300 |
| C | -4.36926400 | -3.35344500 | -0.77952100 |
| H | -5.26485700 | -3.76585900 | -0.30727800 |
| H | -4.61700100 | -3.11534200 | -1.81916400 |
| H | -3.60176500 | -4.13384200 | -0.78904900 |
| H | -4.67670700 | -1.36291600 | 0.00132400  |
| H | -3.63039100 | -2.36465900 | 0.99741500  |
| H | -1.76106800 | -0.75359700 | 1.11406600  |
| C | 1.82265900  | 3.28356000  | -0.57154600 |

|    |             |            |             |
|----|-------------|------------|-------------|
| C  | -0.19484300 | 2.81342500 | 0.49017300  |
| H  | 2.14278300  | 3.80811900 | 0.34103900  |
| H  | 2.23090900  | 3.80908000 | -1.43606900 |
| H  | -1.26813500 | 2.86694700 | 0.32204800  |
| H  | 0.04682900  | 3.46652700 | 1.34504800  |
| O  | 0.41525900  | 3.32668100 | -0.67873000 |
| Br | -3.19144200 | 1.09233800 | 0.27446700  |

(S)-TS3<sub>P</sub>-Br-P

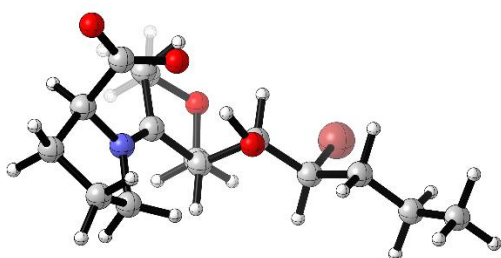

-----  
 - Thermochemistry -  
 -----

|                                              |                             |
|----------------------------------------------|-----------------------------|
| Zero-point correction=                       | 0.389305 (Hartree/Particle) |
| Thermal correction to Energy=                | 0.407158                    |
| Thermal correction to Enthalpy=              | 0.408023                    |
| Thermal correction to Gibbs Free Energy=     | 0.343919                    |
| Sum of electronic and zero-point Energies=   | -3512.779751                |
| Sum of electronic and thermal Energies=      | -3512.761897                |
| Sum of electronic and thermal Enthalpies=    | -3512.761032                |
| Sum of electronic and thermal Free Energies= | -3512.825136                |

Number of Imaginary Frequencies = 0

E (Single Point Energy) [IEFPCM(DCM)M06-2X/6-311++G(2d,2p)] = -3515.788684

|   |            |            |            |
|---|------------|------------|------------|
| C | 0.11611700 | 0.70990800 | 0.93043700 |
| H | 0.11314800 | 0.13979100 | 1.86300100 |
| C | 1.50863000 | 0.84279200 | 0.38486700 |
| N | 2.45328100 | 0.03878600 | 0.73371500 |



|   |             |             |             |
|---|-------------|-------------|-------------|
| C | 3.73530900  | -0.08247200 | 0.00603900  |
| H | 4.19471100  | 0.89718700  | -0.12571200 |
| C | 2.33300700  | -1.03993000 | 1.76135600  |
| H | 2.41811000  | -0.56407800 | 2.74289800  |
| H | 1.36949900  | -1.53439000 | 1.66070300  |
| C | 3.51776400  | -1.95621200 | 1.46591200  |
| H | 3.84762000  | -2.47986000 | 2.36386800  |
| H | 3.23332700  | -2.69951000 | 0.71483800  |
| C | 4.56852000  | -1.00195800 | 0.89737500  |
| H | 5.04003300  | -0.42501400 | 1.69896400  |
| H | 5.34513900  | -1.49763300 | 0.31510000  |
| C | 1.69072200  | 1.88865900  | -0.67401500 |
| H | 2.74110900  | 2.09502200  | -0.87821100 |
| H | 1.25469200  | 1.48674100  | -1.59682900 |
| C | -0.66756400 | -0.13313500 | -0.13587500 |
| H | -0.71469200 | 0.42289800  | -1.08063600 |
| C | -2.11132200 | -0.43020400 | 0.32272600  |
| O | -0.00272300 | -1.36047300 | -0.31592500 |
| C | 3.47457200  | -0.70711100 | -1.41439600 |
| O | 2.28181000  | -0.96283200 | -1.73023300 |
| O | 4.50542300  | -0.87506300 | -2.08198100 |
| H | 0.80954500  | -1.23270700 | -0.86467300 |
| C | -2.68381100 | -1.70966500 | -0.26719200 |
| H | -1.98894500 | -2.51204300 | 0.00172600  |
| C | -4.07828300 | -2.06400600 | 0.24442400  |
| H | -2.67637100 | -1.63927400 | -1.36178500 |
| C | -4.49849700 | -3.46252400 | -0.20312400 |
| H | -5.50487900 | -3.70558400 | 0.14813500  |

|    |             |             |             |
|----|-------------|-------------|-------------|
| H  | -4.49684000 | -3.53678400 | -1.29556700 |
| H  | -3.81224300 | -4.22251100 | 0.18397700  |
| H  | -4.80514700 | -1.32726300 | -0.11222400 |
| H  | -4.08431900 | -2.00471800 | 1.34068700  |
| H  | -2.18996900 | -0.44218100 | 1.41403300  |
| C  | 0.96433500  | 3.18682100  | -0.28880200 |
| C  | -0.44018800 | 2.11274100  | 1.22069000  |
| H  | 1.49069300  | 3.68377200  | 0.53866100  |
| H  | 0.94484400  | 3.86082500  | -1.14547100 |
| H  | -1.48191400 | 2.05837700  | 1.53437500  |
| H  | 0.14059500  | 2.56255600  | 2.04002100  |
| O  | -0.37698700 | 2.93645100  | 0.07769500  |
| Br | -3.26276500 | 1.07194300  | -0.23813900 |

(R)-TS3<sub>G</sub>-Br-Pre

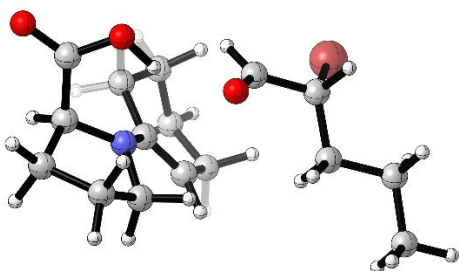

-----  
 - Thermochemistry -  
 -----

|                                              |                             |
|----------------------------------------------|-----------------------------|
| Zero-point correction=                       | 0.408765 (Hartree/Particle) |
| Thermal correction to Energy=                | 0.428420                    |
| Thermal correction to Enthalpy=              | 0.429285                    |
| Thermal correction to Gibbs Free Energy=     | 0.360779                    |
| Sum of electronic and zero-point Energies=   | -3476.855740                |
| Sum of electronic and thermal Energies=      | -3476.836085                |
| Sum of electronic and thermal Enthalpies=    | -3476.835220                |
| Sum of electronic and thermal Free Energies= | -3476.903726                |

Number of Imaginary Frequencies = 0

E (Single Point Energy) [IEFPCM<sub>(DCM)</sub>M06-2X/6-311++G(2d,2p)] = -3479.870365

|   |             |             |             |
|---|-------------|-------------|-------------|
| C | -0.09151900 | 0.43628500  | -1.78543900 |
| H | 0.07844400  | -0.56205100 | -2.17786500 |
| C | -1.16161800 | 0.66312500  | -0.99300200 |
| N | -2.04631500 | -0.35436400 | -0.61926100 |
| C | -3.43380200 | -0.05993100 | -0.26379100 |
| H | -3.81763300 | 0.84339700  | -0.74605500 |
| C | -1.92455000 | -1.67876800 | -1.22968000 |
| H | -0.98486200 | -2.14943200 | -0.92300200 |
| H | -1.93084100 | -1.60155700 | -2.32891100 |
| C | -3.16091800 | -2.41316600 | -0.72359900 |
| H | -2.99215100 | -2.78147200 | 0.29445700  |
| H | -3.42997000 | -3.26213600 | -1.35436500 |
| C | -4.21873400 | -1.30673400 | -0.73304900 |
| H | -4.56961800 | -1.13335300 | -1.75422400 |
| H | -5.08690500 | -1.50971700 | -0.10294300 |
| C | -1.43790800 | 2.02825600  | -0.39708400 |
| H | -2.29372400 | 2.48605100  | -0.91085400 |
| H | -1.73691300 | 1.91571100  | 0.65387300  |
| C | 0.36805400  | 2.91322700  | -1.90155400 |
| C | 0.57234700  | -0.46312200 | 1.32676100  |
| H | 0.22510300  | 0.57734300  | 1.45748800  |
| C | 2.05387500  | -0.69392200 | 1.10175200  |
| O | -0.18955800 | -1.40200200 | 1.41282600  |
| C | -3.62972800 | 0.13921200  | 1.24078700  |
| O | -2.68694100 | -0.34939100 | 2.04301400  |
| O | -4.61798100 | 0.67711800  | 1.69147900  |

|    |             |             |             |
|----|-------------|-------------|-------------|
| H  | -1.93806300 | -0.73199700 | 1.53162100  |
| C  | 2.35220100  | -1.55298000 | -0.12003400 |
| H  | 2.10050600  | -0.98571800 | -1.02248500 |
| H  | 2.44263100  | -1.17050000 | 2.00711500  |
| C  | 3.79385400  | -2.04886400 | -0.18522500 |
| H  | 4.03810100  | -2.56986000 | 0.74879200  |
| H  | 1.66707900  | -2.40977700 | -0.07000000 |
| H  | 4.47058700  | -1.19029100 | -0.25624700 |
| C  | 4.01081500  | -2.98173000 | -1.37431900 |
| H  | 5.04776700  | -3.32367200 | -1.42306600 |
| H  | 3.36701700  | -3.86414200 | -1.30361700 |
| H  | 3.78012800  | -2.47097900 | -2.31486300 |
| C  | -0.22657500 | 2.95684700  | -0.49559300 |
| C  | 0.88235500  | 1.50687300  | -2.21217700 |
| H  | -0.52471500 | 3.97410000  | -0.22453600 |
| H  | 0.53888200  | 2.63994800  | 0.22426800  |
| H  | -0.40852000 | 3.18871900  | -2.62745000 |
| H  | 1.17798200  | 3.64267800  | -2.00176100 |
| H  | 1.85304300  | 1.35270100  | -1.71955100 |
| H  | 1.07306000  | 1.40726700  | -3.28740100 |
| Br | 2.96127800  | 1.03130900  | 1.00741000  |

(R)-TS3<sub>G</sub>-Br

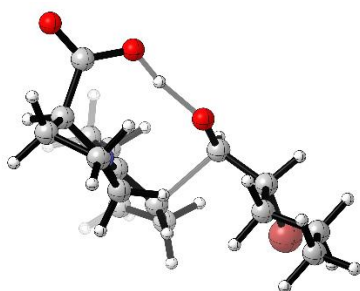

-----  
- Thermochemistry -  
-----

|                                              |                             |
|----------------------------------------------|-----------------------------|
| Zero-point correction=                       | 0.408923 (Hartree/Particle) |
| Thermal correction to Energy=                | 0.426840                    |
| Thermal correction to Enthalpy=              | 0.427705                    |
| Thermal correction to Gibbs Free Energy=     | 0.364378                    |
| Sum of electronic and zero-point Energies=   | -3476.842064                |
| Sum of electronic and thermal Energies=      | -3476.824147                |
| Sum of electronic and thermal Enthalpies=    | -3476.823282                |
| Sum of electronic and thermal Free Energies= | -3476.886609                |

Number of Imaginary Frequencies = 1

E (Single Point Energy) [IEFPCM(DCM)M06-2X/6-311++G(2d,2p)] = -3479.854643

|   |             |             |             |
|---|-------------|-------------|-------------|
| C | 0.07725800  | 1.12921400  | -0.81403500 |
| H | 0.58536200  | 0.38797900  | -1.42542300 |
| C | -1.29402000 | 0.95166500  | -0.60534600 |
| N | -1.87300400 | -0.24761900 | -0.74321600 |
| C | -3.27879100 | -0.52789000 | -0.43863900 |
| H | -3.92925800 | 0.26760000  | -0.80976100 |
| C | -1.21762200 | -1.39440000 | -1.39580800 |
| H | -0.24134700 | -1.57181300 | -0.95316600 |
| H | -1.09633300 | -1.17408300 | -2.46488100 |
| C | -2.18929200 | -2.54440900 | -1.15388800 |
| H | -2.00116300 | -2.98382400 | -0.16808700 |

|   |             |             |             |
|---|-------------|-------------|-------------|
| H | -2.09526500 | -3.32904500 | -1.90587100 |
| C | -3.55147700 | -1.84942700 | -1.17784800 |
| H | -3.84505600 | -1.62658800 | -2.20770600 |
| H | -4.35316200 | -2.41609000 | -0.70310900 |
| C | -2.17731500 | 2.06484900  | -0.08647700 |
| H | -2.97487500 | 2.20879500  | -0.82737100 |
| H | -2.67002800 | 1.74442800  | 0.83899700  |
| C | -0.43048200 | 3.61369200  | -0.98079100 |
| C | 0.62015200  | 0.19460000  | 1.05354000  |
| H | 0.58960700  | 1.18808400  | 1.52427300  |
| C | 2.03185000  | -0.36988600 | 0.84652500  |
| O | -0.22679000 | -0.69313900 | 1.36403800  |
| C | -3.60023200 | -0.65886300 | 1.06277300  |
| O | -2.62861700 | -0.65250300 | 1.94184000  |
| O | -4.76820900 | -0.76647400 | 1.39019900  |
| H | -1.64410600 | -0.59776100 | 1.60535700  |
| C | 2.12508200  | -1.63289700 | 0.00930700  |
| H | 1.95110400  | -1.39181600 | -1.04731700 |
| H | 2.37974000  | -0.58215600 | 1.86368100  |
| C | 3.45003500  | -2.37965700 | 0.15594800  |
| H | 3.65883400  | -2.52798400 | 1.22287100  |
| H | 1.30763400  | -2.28273000 | 0.34535800  |
| H | 4.26479500  | -1.76634600 | -0.24273500 |
| C | 3.41666100  | -3.72922900 | -0.55770900 |
| H | 4.37108600  | -4.25282500 | -0.45839400 |
| H | 2.63351500  | -4.37238600 | -0.14377700 |
| H | 3.21477500  | -3.59936300 | -1.62616100 |
| C | -1.44872200 | 3.39064900  | 0.13077000  |

|    |             |            |             |
|----|-------------|------------|-------------|
| C  | 0.64830200  | 2.54043800 | -0.86198700 |
| H  | -2.18723100 | 4.19564100 | 0.17630700  |
| H  | -0.92741900 | 3.37948700 | 1.09609300  |
| H  | -0.92726100 | 3.55437200 | -1.95836000 |
| H  | 0.02155600  | 4.60685300 | -0.90094500 |
| H  | 1.22399700  | 2.75323100 | 0.04730500  |
| H  | 1.36198600  | 2.60521300 | -1.68873400 |
| Br | 3.32400400  | 0.95493400 | 0.20935500  |

(R)-TS3<sub>G</sub>-Br-P

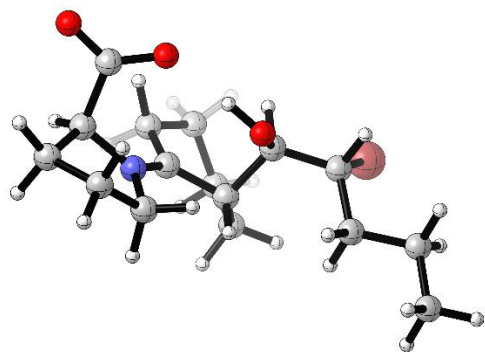

-----  
 - Thermochemistry -  
 -----

|                                              |                             |
|----------------------------------------------|-----------------------------|
| Zero-point correction=                       | 0.413638 (Hartree/Particle) |
| Thermal correction to Energy=                | 0.431757                    |
| Thermal correction to Enthalpy=              | 0.432622                    |
| Thermal correction to Gibbs Free Energy=     | 0.368487                    |
| Sum of electronic and zero-point Energies=   | -3476.868238                |
| Sum of electronic and thermal Energies=      | -3476.850119                |
| Sum of electronic and thermal Enthalpies=    | -3476.849254                |
| Sum of electronic and thermal Free Energies= | -3476.913388                |

Number of Imaginary Frequencies = 0

E (Single Point Energy) [IEFPCM(DCM)M06-2X/6-311++G(2d,2p)] = -3479.885557

|   |            |             |             |
|---|------------|-------------|-------------|
| C | 0.09029200 | 0.11009300  | -0.86990900 |
| H | 0.13206800 | -0.89892100 | -1.28561600 |

|   |             |             |             |
|---|-------------|-------------|-------------|
| C | -1.33288300 | 0.55209000  | -0.74166400 |
| N | -2.30703000 | -0.29347200 | -0.74743600 |
| C | -3.66781000 | 0.04678600  | -0.29412000 |
| H | -3.98595600 | 1.00155500  | -0.71539400 |
| C | -2.20150100 | -1.75637900 | -1.03181100 |
| H | -1.35925900 | -2.17756700 | -0.48723300 |
| H | -2.04788300 | -1.86498100 | -2.10962200 |
| C | -3.55384800 | -2.31340400 | -0.58841500 |
| H | -3.51036100 | -2.59831900 | 0.46712500  |
| H | -3.83118600 | -3.19232600 | -1.17151500 |
| C | -4.50893200 | -1.13270000 | -0.77730400 |
| H | -4.76558400 | -1.00635800 | -1.83377700 |
| H | -5.42763200 | -1.21375600 | -0.19646300 |
| C | -1.60000200 | 2.01761800  | -0.52458900 |
| H | -2.22408700 | 2.35123800  | -1.36641300 |
| H | -2.20270700 | 2.14043000  | 0.38141100  |
| C | 0.63901700  | 2.56113100  | -1.59623900 |
| C | 0.56773900  | -0.04153500 | 0.62009700  |
| H | 0.41488000  | 0.89079700  | 1.17195600  |
| C | 2.03848100  | -0.44391900 | 0.77091900  |
| O | -0.17114600 | -1.07831400 | 1.22731900  |
| C | -3.67369300 | 0.16229900  | 1.27734800  |
| O | -2.57680900 | 0.00801900  | 1.87871000  |
| O | -4.79146100 | 0.40193400  | 1.75709300  |
| H | -1.04890100 | -0.72452700 | 1.51286000  |
| C | 2.50301800  | -1.55108400 | -0.15592000 |
| H | 2.52978600  | -1.19343200 | -1.19186700 |
| H | 2.17090300  | -0.73691200 | 1.81363000  |



|    |             |             |             |
|----|-------------|-------------|-------------|
| C  | 3.85295400  | -2.15853500 | 0.21681300  |
| H  | 3.83688800  | -2.44413400 | 1.27577300  |
| H  | 1.73155300  | -2.33364500 | -0.10338600 |
| H  | 4.63614700  | -1.40060600 | 0.10561900  |
| C  | 4.17837100  | -3.37619500 | -0.64531900 |
| H  | 5.15304200  | -3.79689600 | -0.38487100 |
| H  | 3.42609000  | -4.16070400 | -0.51512200 |
| H  | 4.20183100  | -3.10557000 | -1.70617000 |
| C  | -0.33027900 | 2.87023200  | -0.45235800 |
| C  | 0.84831300  | 1.04766900  | -1.83315200 |
| H  | -0.62533800 | 3.92203500  | -0.48831800 |
| H  | 0.16525600  | 2.72925800  | 0.51204500  |
| H  | 0.25050700  | 3.01271100  | -2.51503100 |
| H  | 1.59788800  | 3.04440400  | -1.38984100 |
| H  | 1.90830300  | 0.79305300  | -1.81371000 |
| H  | 0.49481800  | 0.78747100  | -2.83602400 |
| Br | 3.19280100  | 1.14319700  | 0.59859400  |

(S)-TS3<sub>G</sub>-Br-Pre

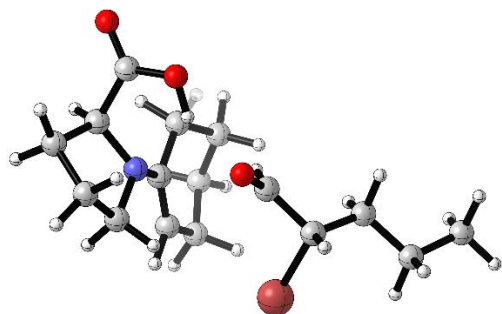

-----  
 - Thermochemistry -  
 -----

Zero-point correction=  
 Thermal correction to Energy=

0.408526 (Hartree/Particle)  
 0.428447

|                                              |              |
|----------------------------------------------|--------------|
| Thermal correction to Enthalpy=              | 0.429312     |
| Thermal correction to Gibbs Free Energy=     | 0.358896     |
| Sum of electronic and zero-point Energies=   | -3476.854299 |
| Sum of electronic and thermal Energies=      | -3476.834378 |
| Sum of electronic and thermal Enthalpies=    | -3476.833513 |
| Sum of electronic and thermal Free Energies= | -3476.903929 |

Number of Imaginary Frequencies = 0

E (Single Point Energy) [IEFPCM(DCM)M06-2X/6-311++G(2d,2p)] = -3479.868737

|   |             |             |             |
|---|-------------|-------------|-------------|
| C | 0.52666300  | 1.66788800  | 1.30629400  |
| H | 0.39858800  | 1.11356600  | 2.23075600  |
| C | 1.35301500  | 1.19932400  | 0.35356900  |
| N | 2.04314900  | -0.02274500 | 0.47703800  |
| C | 3.40994100  | -0.12228400 | -0.04490700 |
| H | 3.93672600  | 0.83724300  | -0.04640100 |
| C | 1.91380600  | -0.79169600 | 1.71528200  |
| H | 0.88862300  | -1.16139100 | 1.82116600  |
| H | 2.15050200  | -0.17224600 | 2.59584300  |
| C | 2.95061300  | -1.89338800 | 1.54224800  |
| H | 2.56796700  | -2.66904100 | 0.86960700  |
| H | 3.22727400  | -2.36347200 | 2.48762800  |
| C | 4.11296200  | -1.13223100 | 0.89793400  |
| H | 4.66110400  | -0.57325000 | 1.66118800  |
| H | 4.82499100  | -1.76868000 | 0.36816400  |
| C | 1.53458500  | 1.90516100  | -0.97519900 |
| H | 2.51209300  | 2.40597800  | -0.99764200 |
| H | 1.55342900  | 1.16008800  | -1.78144700 |
| C | 0.17697100  | 3.78811800  | -0.00777400 |
| C | -0.76712700 | -1.15056800 | -0.65468700 |
| H | -0.45195100 | -0.12446100 | -0.91956100 |
| C | -2.21945500 | -1.30488700 | -0.28800900 |

|    |             |             |             |
|----|-------------|-------------|-------------|
| O  | 0.01949400  | -2.07327000 | -0.65699300 |
| C  | 3.45853500  | -0.64484800 | -1.47887100 |
| O  | 2.44211600  | -1.40637400 | -1.87737800 |
| O  | 4.40227000  | -0.43179700 | -2.20948500 |
| H  | 1.73635500  | -1.45859300 | -1.19428500 |
| C  | -3.13099200 | -0.60553200 | -1.28118400 |
| H  | -2.94492300 | -1.07172200 | -2.25921200 |
| H  | -2.46894000 | -2.35450600 | -0.12965400 |
| C  | -4.61778300 | -0.70798600 | -0.95123400 |
| H  | -4.81353100 | -0.19272300 | -0.00520100 |
| H  | -2.83151800 | 0.44719800  | -1.36324500 |
| H  | -4.87969100 | -1.76199600 | -0.79842400 |
| C  | -5.48073300 | -0.11026300 | -2.05989100 |
| H  | -6.54225900 | -0.17138600 | -1.80725700 |
| H  | -5.23281700 | 0.94403900  | -2.21962600 |
| H  | -5.32769700 | -0.63887100 | -3.00597900 |
| C  | 0.42774400  | 2.92734900  | -1.24370400 |
| C  | -0.30765900 | 2.91254200  | 1.14667800  |
| H  | 0.69931200  | 3.54290300  | -2.10655800 |
| H  | -0.50105100 | 2.40135100  | -1.50573200 |
| H  | 1.11254500  | 4.28674700  | 0.27792200  |
| H  | -0.55560000 | 4.57194000  | -0.22481200 |
| H  | -1.35820700 | 2.62794000  | 0.98059000  |
| H  | -0.29597900 | 3.48126900  | 2.08361300  |
| Br | -2.32357000 | -0.44306800 | 1.47831000  |

(S)-TS3<sub>G</sub>-Br

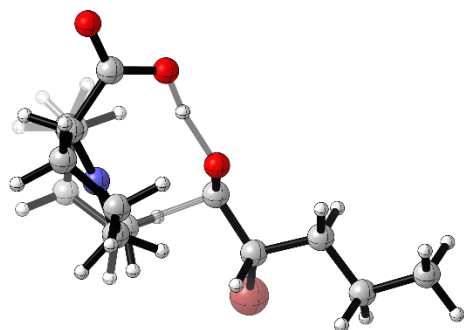

-----  
- Thermochemistry -  
-----

|                                              |                             |
|----------------------------------------------|-----------------------------|
| Zero-point correction=                       | 0.408667 (Hartree/Particle) |
| Thermal correction to Energy=                | 0.426697                    |
| Thermal correction to Enthalpy=              | 0.427562                    |
| Thermal correction to Gibbs Free Energy=     | 0.363619                    |
| Sum of electronic and zero-point Energies=   | -3476.841290                |
| Sum of electronic and thermal Energies=      | -3476.823260                |
| Sum of electronic and thermal Enthalpies=    | -3476.822395                |
| Sum of electronic and thermal Free Energies= | -3476.886337                |

Number of Imaginary Frequencies = 1

E (Single Point Energy) [IEFPCM<sub>(DCM)</sub>M06-2X/6-311++G(2d,2p)] = -3479.854911

|   |             |             |            |
|---|-------------|-------------|------------|
| C | 0.20711100  | 1.38656600  | 0.66043000 |
| H | -0.21875300 | 0.93684400  | 1.55328500 |
| C | 1.51950900  | 1.02726800  | 0.34070800 |
| N | 2.05004900  | -0.12083100 | 0.77922600 |
| C | 3.37780800  | -0.61325300 | 0.40288800 |
| H | 4.11811000  | 0.19004200  | 0.42819300 |
| C | 1.43929800  | -0.95061500 | 1.83545800 |
| H | 0.39663900  | -1.15594000 | 1.60221200 |
| H | 1.50076900  | -0.41275400 | 2.79068300 |
| C | 2.29690200  | -2.21127000 | 1.83246200 |

|   |             |             |             |
|---|-------------|-------------|-------------|
| H | 1.93696700  | -2.89833900 | 1.05907400  |
| H | 2.27376500  | -2.72760400 | 2.79310800  |
| C | 3.68388300  | -1.67797100 | 1.47080500  |
| H | 4.14068400  | -1.19142200 | 2.33741100  |
| H | 4.37210800  | -2.43615000 | 1.09569200  |
| C | 2.36177700  | 1.83758900  | -0.61898600 |
| H | 3.25466100  | 2.15760400  | -0.06498900 |
| H | 2.71693600  | 1.19835900  | -1.43513100 |
| C | 0.81866700  | 3.73473900  | -0.09259000 |
| C | -0.68054900 | -0.07745200 | -0.64917400 |
| H | -0.77841700 | 0.69481100  | -1.42745000 |
| C | -1.97337300 | -0.45627400 | 0.07984400  |
| O | 0.09930500  | -1.06152100 | -0.80422000 |
| C | 3.46561400  | -1.21176800 | -1.01482200 |
| O | 2.37476100  | -1.37979300 | -1.72189400 |
| O | 4.56544700  | -1.51285300 | -1.44157500 |
| H | 1.46012600  | -1.15094500 | -1.28472900 |
| C | -2.72862500 | -1.50693800 | -0.73219900 |
| H | -2.01121500 | -2.31399200 | -0.92155200 |
| H | -1.75560100 | -0.82801800 | 1.08302900  |
| C | -3.95926100 | -2.07889100 | -0.03158700 |
| H | -4.72721100 | -1.30429600 | 0.06077300  |
| H | -3.00315900 | -1.07927900 | -1.70497000 |
| H | -3.68443000 | -2.37255900 | 0.98966800  |
| C | -4.52286100 | -3.28207900 | -0.78498300 |
| H | -5.41509400 | -3.67553100 | -0.29069500 |
| H | -4.79975700 | -3.00536900 | -1.80760200 |
| H | -3.78553400 | -4.08886700 | -0.84477100 |

|    |             |            |             |
|----|-------------|------------|-------------|
| C  | 1.64937600  | 3.06679900 | -1.18205800 |
| C  | -0.30039800 | 2.77918400 | 0.31301600  |
| H  | 2.39635400  | 3.74695900 | -1.60024000 |
| H  | 0.98805300  | 2.77073600 | -2.00609100 |
| H  | 1.45704900  | 3.96792400 | 0.77003600  |
| H  | 0.39331500  | 4.67705800 | -0.45064300 |
| H  | -1.01222300 | 2.73035700 | -0.52099500 |
| H  | -0.86448100 | 3.17095400 | 1.16458700  |
| Br | -3.14129600 | 1.09385100 | 0.34125100  |

(S)-TS3<sub>G</sub>-Br-P

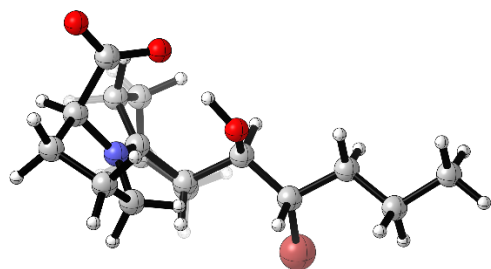

-----  
 - Thermochemistry -  
 -----

|                                              |                             |
|----------------------------------------------|-----------------------------|
| Zero-point correction=                       | 0.412288 (Hartree/Particle) |
| Thermal correction to Energy=                | 0.430494                    |
| Thermal correction to Enthalpy=              | 0.431359                    |
| Thermal correction to Gibbs Free Energy=     | 0.366119                    |
| Sum of electronic and zero-point Energies=   | -3476.864630                |
| Sum of electronic and thermal Energies=      | -3476.846425                |
| Sum of electronic and thermal Enthalpies=    | -3476.845559                |
| Sum of electronic and thermal Free Energies= | -3476.910799                |

Number of Imaginary Frequencies = 0

E (Single Point Energy) [IEFPCM(DCM)M06-2X/6-311++G(2d,2p)] = -3479.881840

|   |             |            |            |
|---|-------------|------------|------------|
| C | 0.03355600  | 1.11122400 | 0.33191400 |
| H | -0.13500000 | 0.88367700 | 1.38857200 |

|   |             |             |             |
|---|-------------|-------------|-------------|
| C | 1.50384600  | 0.95554800  | 0.04605500  |
| N | 2.19512300  | 0.08801500  | 0.71031100  |
| C | 3.57198100  | -0.30950300 | 0.35304100  |
| H | 4.17452000  | 0.57507500  | 0.13946000  |
| C | 1.69503500  | -0.73122700 | 1.85387800  |
| H | 0.72546600  | -1.15528000 | 1.60437600  |
| H | 1.60983400  | -0.06585700 | 2.71886200  |
| C | 2.78307600  | -1.78407900 | 2.04940000  |
| H | 2.58158100  | -2.64849300 | 1.40891900  |
| H | 2.82675500  | -2.12328900 | 3.08495200  |
| C | 4.05323200  | -1.06838100 | 1.58807900  |
| H | 4.39942400  | -0.36583400 | 2.35258600  |
| H | 4.86933800  | -1.74172000 | 1.32795600  |
| C | 2.17680300  | 1.72869800  | -1.05699700 |
| H | 3.07212400  | 2.19210500  | -0.62269500 |
| H | 2.52576200  | 1.01310300  | -1.80918400 |
| C | 0.53413500  | 3.50801000  | -0.53759600 |
| C | -0.70982900 | -0.00243000 | -0.51761100 |
| H | -0.93383900 | 0.44061400  | -1.50048100 |
| C | -2.01602000 | -0.51348900 | 0.11771300  |
| O | 0.01648000  | -1.19691000 | -0.64868000 |
| C | 3.57781600  | -1.21155700 | -0.93816400 |
| O | 2.49305000  | -1.35487000 | -1.56358100 |
| O | 4.69235100  | -1.67758600 | -1.21428900 |
| H | 0.90884600  | -1.11799000 | -1.07659100 |
| C | -2.83024300 | -1.33890600 | -0.86889200 |
| H | -2.12917600 | -2.04173600 | -1.33405100 |
| H | -1.75478200 | -1.09823300 | 1.00363600  |

|    |             |             |             |
|----|-------------|-------------|-------------|
| C  | -3.98174400 | -2.12007400 | -0.23978200 |
| H  | -4.72182900 | -1.42229200 | 0.16620500  |
| H  | -3.20595600 | -0.67648300 | -1.65914600 |
| H  | -3.59805300 | -2.70194600 | 0.60781800  |
| C  | -4.64726500 | -3.05221400 | -1.25001800 |
| H  | -5.48010300 | -3.59722900 | -0.79780900 |
| H  | -5.03899900 | -2.48611700 | -2.10161100 |
| H  | -3.93297700 | -3.78610900 | -1.63658300 |
| C  | 1.29772200  | 2.82033000  | -1.66118000 |
| C  | -0.50395800 | 2.53910500  | 0.02503400  |
| H  | 1.93488300  | 3.51690700  | -2.21114300 |
| H  | 0.59080200  | 2.39325000  | -2.38275600 |
| H  | 1.23896300  | 3.82599400  | 0.24251600  |
| H  | 0.02347900  | 4.40679700  | -0.89352300 |
| H  | -1.30856400 | 2.45454900  | -0.71176400 |
| H  | -0.95576200 | 2.94603000  | 0.93122600  |
| Br | -3.15704300 | 0.92608600  | 0.81232100  |

(*R*)-TS3<sub>O</sub>-Br-Pre

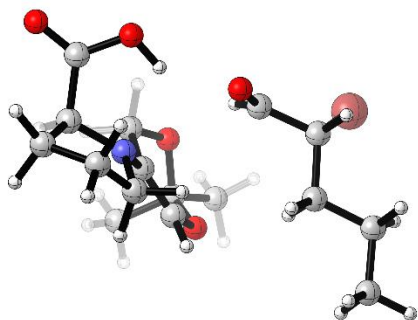

-----  
 - Thermochemistry -  
 -----

Zero-point correction=  
 Thermal correction to Energy=

0.416746 (Hartree/Particle)  
 0.438418



|                                              |              |
|----------------------------------------------|--------------|
| Thermal correction to Enthalpy=              | 0.439283     |
| Thermal correction to Gibbs Free Energy=     | 0.365694     |
| Sum of electronic and zero-point Energies=   | -3627.233448 |
| Sum of electronic and thermal Energies=      | -3627.211775 |
| Sum of electronic and thermal Enthalpies=    | -3627.210910 |
| Sum of electronic and thermal Free Energies= | -3627.284499 |

Number of Imaginary Frequencies = 0

E (Single Point Energy) [IEFPCM(DCM)M06-2X/6-311++G(2d,2p)] = -3630.303915

|   |             |             |             |
|---|-------------|-------------|-------------|
| C | 0.37610200  | 0.92446500  | 1.43158000  |
| H | 0.26364900  | 0.32643500  | 2.32713000  |
| C | 1.34951100  | 0.75411600  | 0.52133600  |
| N | 2.30336000  | -0.26717100 | 0.59309700  |
| C | 3.65090900  | -0.04915800 | 0.06228300  |
| H | 3.91978300  | 1.01081200  | 0.00301400  |
| C | 2.34154600  | -1.10864200 | 1.79056900  |
| H | 1.45814600  | -1.75521100 | 1.82158500  |
| H | 2.35379100  | -0.48943000 | 2.70235100  |
| C | 3.65501100  | -1.86819100 | 1.64004300  |
| H | 3.53180200  | -2.70424500 | 0.94327900  |
| H | 4.01961400  | -2.26188500 | 2.59013600  |
| C | 4.57569600  | -0.79756200 | 1.04715500  |
| H | 4.89239600  | -0.10199500 | 1.82938500  |
| H | 5.46625300  | -1.19156200 | 0.55472000  |
| C | 1.33525300  | 1.60376600  | -0.72539200 |
| H | 2.11836900  | 2.37520400  | -0.71103000 |
| H | 1.49901300  | 0.98151500  | -1.61280600 |
| O | -0.64558400 | 1.83336300  | 1.28680400  |
| O | 0.05547500  | 2.19059500  | -0.89908500 |
| C | -0.45924800 | 2.81327100  | 0.26441900  |
| C | -1.83993600 | 3.31352400  | -0.09924900 |

|    |             |             |             |
|----|-------------|-------------|-------------|
| H  | -2.43180100 | 2.48280900  | -0.49201200 |
| H  | -1.76315300 | 4.09557000  | -0.85759500 |
| C  | 0.46081600  | 3.91486300  | 0.77828300  |
| H  | 0.69349600  | 4.60827600  | -0.03393600 |
| H  | 1.39111500  | 3.50582200  | 1.17967400  |
| H  | -0.04463100 | 4.45989300  | 1.57815400  |
| C  | -0.69637600 | -1.11196000 | -0.91528100 |
| H  | -0.56629600 | -0.07298900 | -1.26419300 |
| C  | -2.07534600 | -1.48790000 | -0.42470100 |
| O  | 0.21551000  | -1.91195300 | -0.90271400 |
| C  | 3.81447000  | -0.62251700 | -1.35019400 |
| O  | 2.82676400  | -1.38031200 | -1.81525000 |
| O  | 4.81328900  | -0.41764700 | -2.00523800 |
| H  | -2.33025800 | 3.71894400  | 0.78816300  |
| C  | -2.26014400 | -1.13415400 | 1.04687800  |
| H  | -1.42985200 | -1.61596500 | 1.58320000  |
| C  | -3.58564400 | -1.61852300 | 1.62951300  |
| H  | -4.41060300 | -1.08459100 | 1.14621400  |
| H  | -3.71522600 | -2.68206700 | 1.39416700  |
| H  | -2.15043100 | -0.05129500 | 1.17734900  |
| C  | -3.64044700 | -1.40734500 | 3.14078700  |
| H  | -4.59972900 | -1.73483900 | 3.54969400  |
| H  | -2.84862400 | -1.97107200 | 3.64421800  |
| H  | -3.51132500 | -0.34928800 | 3.39090200  |
| H  | 2.07651700  | -1.42299000 | -1.17940500 |
| H  | -2.24380900 | -2.55160700 | -0.60191100 |
| Br | -3.36852500 | -0.53927800 | -1.54132700 |

(R)-TS3<sub>o</sub>-Br

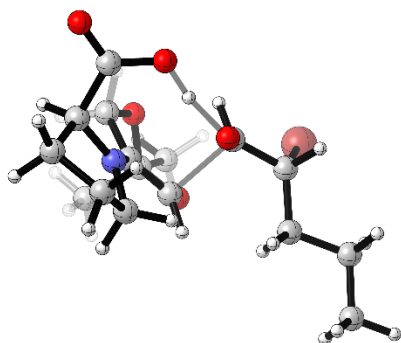

-----  
- Thermochemistry -  
-----

|                                              |                             |
|----------------------------------------------|-----------------------------|
| Zero-point correction=                       | 0.415436 (Hartree/Particle) |
| Thermal correction to Energy=                | 0.435545                    |
| Thermal correction to Enthalpy=              | 0.436410                    |
| Thermal correction to Gibbs Free Energy=     | 0.367930                    |
| Sum of electronic and zero-point Energies=   | -3627.219874                |
| Sum of electronic and thermal Energies=      | -3627.199766                |
| Sum of electronic and thermal Enthalpies=    | -3627.198901                |
| Sum of electronic and thermal Free Energies= | -3627.267380                |

Number of Imaginary Frequencies = 1

E (Single Point Energy) [IEFPCM(DCM)M06-2X/6-311++G(2d,2p)] = -3630.286244

|   |             |             |            |
|---|-------------|-------------|------------|
| C | -0.07179100 | 0.33890500  | 0.96471900 |
| H | -0.23622100 | -0.48738900 | 1.64603300 |
| C | 1.22054000  | 0.66260600  | 0.56689200 |
| N | 2.22884400  | -0.20364400 | 0.68489000 |
| C | 3.54833000  | -0.00524900 | 0.08356100 |
| H | 3.85697300  | 1.04190800  | 0.14314900 |
| C | 2.19477900  | -1.37718200 | 1.58615800 |
| H | 1.34245200  | -2.01529300 | 1.35555500 |
| H | 2.11789900  | -1.01888800 | 2.62080500 |
| C | 3.53046400  | -2.06522100 | 1.31075900 |
| H | 3.42630600  | -2.75368100 | 0.46563500 |

|   |             |             |             |
|---|-------------|-------------|-------------|
| H | 3.88189200  | -2.63222100 | 2.17367100  |
| C | 4.45585100  | -0.90357100 | 0.94019100  |
| H | 4.75673100  | -0.35395400 | 1.83674600  |
| H | 5.35196100  | -1.20348300 | 0.39613000  |
| C | 1.42754200  | 1.95235800  | -0.18436600 |
| H | 2.16270500  | 2.57974200  | 0.34040300  |
| H | 1.80981200  | 1.75455800  | -1.19277100 |
| O | -1.05814100 | 1.29968900  | 1.05892500  |
| O | 0.19937900  | 2.62606500  | -0.35656200 |
| C | -0.62524500 | 2.63549200  | 0.79762200  |
| C | -1.85806300 | 3.43512200  | 0.44216400  |
| H | -2.30120000 | 3.03048800  | -0.46865100 |
| H | -1.58438700 | 4.48078700  | 0.28601900  |
| C | 0.09915300  | 3.19277000  | 2.02067500  |
| H | 0.54183500  | 4.16186600  | 1.77601100  |
| H | 0.88575400  | 2.52445100  | 2.37969100  |
| H | -0.62344300 | 3.32696200  | 2.82790000  |
| C | -0.33777900 | -0.70592300 | -0.85469700 |
| H | -0.20688400 | 0.18378700  | -1.49012400 |
| C | -1.79569400 | -1.15737300 | -0.71516200 |
| O | 0.52084400  | -1.64256300 | -0.89617000 |
| C | 3.63542600  | -0.39996400 | -1.40449000 |
| O | 2.62634900  | -1.00881800 | -1.96933200 |
| O | 4.66237000  | -0.13462200 | -2.00454500 |
| H | -2.58268700 | 3.37225800  | 1.25665800  |
| C | -2.23783500 | -1.72626000 | 0.62086900  |
| H | -1.41530100 | -2.36366000 | 0.97809600  |
| C | -3.51404900 | -2.56083900 | 0.54360100  |

|    |             |             |             |
|----|-------------|-------------|-------------|
| H  | -4.34034900 | -1.92591600 | 0.20491400  |
| H  | -3.38659000 | -3.34711400 | -0.21048400 |
| H  | -2.37151900 | -0.91182300 | 1.34153700  |
| C  | -3.85670900 | -3.18467300 | 1.89448000  |
| H  | -4.77594300 | -3.77332500 | 1.83725500  |
| H  | -3.05352300 | -3.84538300 | 2.23638900  |
| H  | -4.00047100 | -2.40912900 | 2.65396800  |
| H  | 1.75420300  | -1.25534000 | -1.40617300 |
| H  | -1.90973500 | -1.91889600 | -1.49242300 |
| Br | -3.00566000 | 0.26514900  | -1.30361600 |

(R)-TS3<sub>0</sub>-Br-P

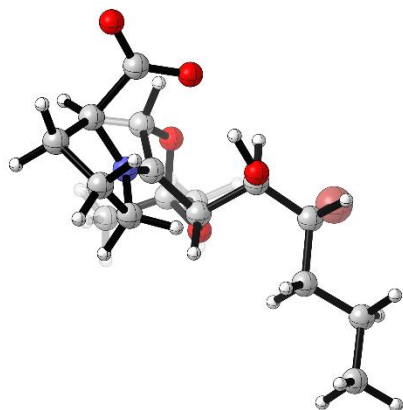

-----  
 - Thermochemistry -  
 -----

|                                              |                             |
|----------------------------------------------|-----------------------------|
| Zero-point correction=                       | 0.419557 (Hartree/Particle) |
| Thermal correction to Energy=                | 0.439800                    |
| Thermal correction to Enthalpy=              | 0.440665                    |
| Thermal correction to Gibbs Free Energy=     | 0.372299                    |
| Sum of electronic and zero-point Energies=   | -3627.244536                |
| Sum of electronic and thermal Energies=      | -3627.224293                |
| Sum of electronic and thermal Enthalpies=    | -3627.223428                |
| Sum of electronic and thermal Free Energies= | -3627.291794                |

Number of Imaginary Frequencies = 0

E (Single Point Energy) [IEFPCM<sub>(DCM)</sub>M06-2X/6-311++G(2d,2p)] = -3630.315445

|   |             |             |             |
|---|-------------|-------------|-------------|
| C | -0.06243100 | 0.09287700  | 0.66117900  |
| H | -0.10425600 | -0.68987200 | 1.42247900  |
| C | 1.35275400  | 0.53931800  | 0.43104700  |
| N | 2.35634500  | -0.22456800 | 0.67127200  |
| C | 3.69821300  | 0.01743800  | 0.10775100  |
| H | 3.96460000  | 1.07264500  | 0.20188300  |
| C | 2.31842900  | -1.53084000 | 1.40117200  |
| H | 1.49637100  | -2.13726400 | 1.02693900  |
| H | 2.17057600  | -1.29656500 | 2.45961900  |
| C | 3.69696400  | -2.13257500 | 1.13058400  |
| H | 3.66677800  | -2.73645400 | 0.21867300  |
| H | 4.01811700  | -2.76928900 | 1.95541900  |
| C | 4.59411700  | -0.90926700 | 0.92489200  |
| H | 4.84584100  | -0.44558500 | 1.88354700  |
| H | 5.51339800  | -1.12796600 | 0.38236600  |
| C | 1.52062700  | 1.87044500  | -0.25029400 |
| H | 2.28298200  | 2.46556500  | 0.27048900  |
| H | 1.85070000  | 1.70632200  | -1.28200000 |
| O | -0.94012800 | 1.12463800  | 1.05486000  |
| O | 0.28377700  | 2.54280800  | -0.30357300 |
| C | -0.46835500 | 2.46499500  | 0.89707300  |
| C | -1.68588900 | 3.34149600  | 0.70720000  |
| H | -2.19290800 | 3.06107100  | -0.21658300 |
| H | -1.38005400 | 4.38885800  | 0.65911600  |
| C | 0.34571000  | 2.86819400  | 2.12537600  |
| H | 0.80784500  | 3.84590400  | 1.96579200  |

|    |             |             |             |
|----|-------------|-------------|-------------|
| H  | 1.12740900  | 2.14462000  | 2.37487300  |
| H  | -0.32760900 | 2.92932800  | 2.98227600  |
| C  | -0.48778200 | -0.53339700 | -0.71360900 |
| H  | -0.36220800 | 0.22267100  | -1.49934800 |
| C  | -1.94778500 | -1.00979900 | -0.70869300 |
| O  | 0.30419300  | -1.66608700 | -0.96236900 |
| C  | 3.69452300  | -0.35332600 | -1.42760400 |
| O  | 2.58405100  | -0.63661000 | -1.95170700 |
| O  | 4.81260700  | -0.30236300 | -1.95407500 |
| H  | -2.36781000 | 3.20524900  | 1.54899200  |
| C  | -2.40630600 | -1.67324900 | 0.57671100  |
| H  | -1.62670100 | -2.40413900 | 0.84131400  |
| C  | -3.74203700 | -2.40425900 | 0.46576700  |
| H  | -4.54004300 | -1.67586000 | 0.28680700  |
| H  | -3.71714700 | -3.06751300 | -0.40777600 |
| H  | -2.45018000 | -0.93099300 | 1.38275000  |
| C  | -4.04499000 | -3.21281000 | 1.72531200  |
| H  | -5.01087400 | -3.71886700 | 1.64894900  |
| H  | -3.27726500 | -3.97428600 | 1.89623800  |
| H  | -4.07506200 | -2.56223100 | 2.60572300  |
| H  | 1.15478400  | -1.37342700 | -1.37448300 |
| H  | -2.03938000 | -1.69925100 | -1.54982500 |
| Br | -3.15808300 | 0.45796500  | -1.19346900 |

(S)-TS3<sub>o</sub>-Br-Pre

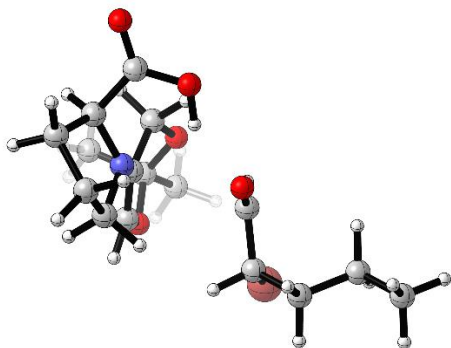

-----  
- Thermochemistry -  
-----

|                                              |                             |
|----------------------------------------------|-----------------------------|
| Zero-point correction=                       | 0.416072 (Hartree/Particle) |
| Thermal correction to Energy=                | 0.437835                    |
| Thermal correction to Enthalpy=              | 0.438700                    |
| Thermal correction to Gibbs Free Energy=     | 0.364450                    |
| Sum of electronic and zero-point Energies=   | -3627.232987                |
| Sum of electronic and thermal Energies=      | -3627.211224                |
| Sum of electronic and thermal Enthalpies=    | -3627.210359                |
| Sum of electronic and thermal Free Energies= | -3627.284609                |

Number of Imaginary Frequencies = 0

E (Single Point Energy) [IEFPCM<sub>(DCM)</sub>M06-2X/6-311++G(2d,2p)] = -3630.301967

|   |            |             |             |
|---|------------|-------------|-------------|
| C | 0.57325200 | 1.32810300  | 1.19135000  |
| H | 0.34710500 | 0.97042500  | 2.18885400  |
| C | 1.40313300 | 0.70979900  | 0.33163300  |
| N | 2.04207300 | -0.50988800 | 0.59671400  |
| C | 3.42198800 | -0.70322000 | 0.13754700  |
| H | 3.95692900 | 0.24141200  | -0.00821300 |
| C | 1.83727000 | -1.13953300 | 1.90274700  |
| H | 0.81212500 | -1.51761800 | 1.97819700  |
| H | 2.00886500 | -0.42121000 | 2.72075000  |
| C | 2.89649200 | -2.23510900 | 1.92605500  |
| H | 2.56270000 | -3.09515800 | 1.33563700  |



|   |             |             |             |
|---|-------------|-------------|-------------|
| H | 3.12217600  | -2.57664900 | 2.93749200  |
| C | 4.08519400  | -1.54138900 | 1.25459800  |
| H | 4.56941100  | -0.86255100 | 1.96197300  |
| H | 4.84098600  | -2.22400500 | 0.86241500  |
| C | 1.55825300  | 1.27344300  | -1.05927000 |
| H | 2.54858200  | 1.72536400  | -1.21744700 |
| H | 1.43253100  | 0.47779800  | -1.80241600 |
| O | -0.09797400 | 2.48462600  | 0.89492900  |
| O | 0.52955700  | 2.21285600  | -1.32244800 |
| C | 0.33879600  | 3.15863000  | -0.28645700 |
| C | -0.80658900 | 4.04454800  | -0.72351300 |
| H | -1.07650400 | 4.72381600  | 0.08767600  |
| H | -1.66746000 | 3.42172500  | -0.97581700 |
| C | 1.61195500  | 3.94213500  | 0.01753300  |
| H | 2.37367500  | 3.31066000  | 0.48098700  |
| H | 1.37625500  | 4.75407900  | 0.70852300  |
| H | 2.01152100  | 4.36622500  | -0.90732200 |
| C | -0.98826600 | -0.86596100 | -0.51354400 |
| H | -0.89003300 | 0.00916500  | -1.17956600 |
| C | -2.07712500 | -0.83182700 | 0.54693300  |
| O | -0.26664100 | -1.83544800 | -0.61223000 |
| C | 3.49108600  | -1.45382300 | -1.19651200 |
| O | 2.37132600  | -2.02512700 | -1.62941000 |
| O | 4.52762400  | -1.55030500 | -1.81654100 |
| H | 1.61957800  | -1.82632400 | -1.02783800 |
| H | -0.50914700 | 4.62834900  | -1.59721800 |
| C | -2.95434700 | -2.07987900 | 0.52942200  |
| H | -3.65137900 | -2.02636400 | 1.37204800  |

|    |             |             |             |
|----|-------------|-------------|-------------|
| H  | -1.59375200 | -0.72644300 | 1.52071300  |
| C  | -3.71335200 | -2.30596300 | -0.77662400 |
| H  | -3.00785000 | -2.30065200 | -1.61734500 |
| H  | -2.27947200 | -2.92463200 | 0.71759700  |
| H  | -4.40787700 | -1.47554000 | -0.94142400 |
| C  | -4.47783200 | -3.62755700 | -0.76129700 |
| H  | -3.79506200 | -4.47362700 | -0.63432900 |
| H  | -5.19814100 | -3.65024200 | 0.06300000  |
| H  | -5.02878200 | -3.77483500 | -1.69362900 |
| Br | -3.09948800 | 0.81396700  | 0.32147700  |

(S)-TS3<sub>0</sub>-Br

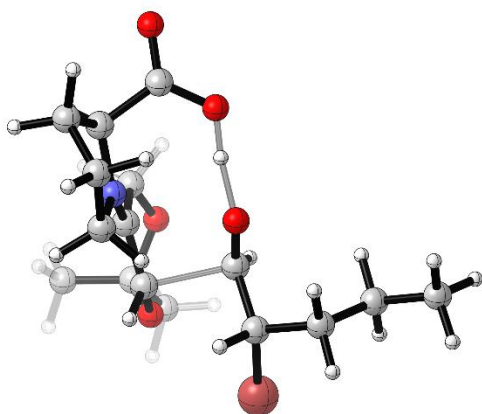

-----  
- Thermochemistry -  
-----

|                                              |                             |
|----------------------------------------------|-----------------------------|
| Zero-point correction=                       | 0.415374 (Hartree/Particle) |
| Thermal correction to Energy=                | 0.435431                    |
| Thermal correction to Enthalpy=              | 0.436296                    |
| Thermal correction to Gibbs Free Energy=     | 0.368051                    |
| Sum of electronic and zero-point Energies=   | -3627.218624                |
| Sum of electronic and thermal Energies=      | -3627.198567                |
| Sum of electronic and thermal Enthalpies=    | -3627.197702                |
| Sum of electronic and thermal Free Energies= | -3627.265946                |

Number of Imaginary Frequencies = 1

E (Single Point Energy) [IEFPCM(DCM)M06-2X/6-311++G(2d,2p)] = -3630.285366

|   |             |             |             |
|---|-------------|-------------|-------------|
| C | 0.05893600  | 1.06216400  | 0.77796900  |
| H | -0.16604600 | 0.78683800  | 1.80432100  |
| C | 1.34190100  | 0.87039500  | 0.26164400  |
| N | 2.15738700  | -0.06519000 | 0.73609600  |
| C | 3.45253600  | -0.40595600 | 0.13799500  |
| H | 4.00285200  | 0.49812800  | -0.13847000 |
| C | 1.93211700  | -0.76286900 | 2.01825400  |
| H | 0.92521000  | -1.17744800 | 2.04943800  |
| H | 2.06276200  | -0.04537100 | 2.83849600  |
| C | 3.01373800  | -1.83871000 | 2.01637000  |
| H | 2.65910000  | -2.71544700 | 1.46447700  |
| H | 3.28409200  | -2.15006600 | 3.02603200  |
| C | 4.16750300  | -1.16613900 | 1.26856100  |
| H | 4.67393000  | -0.44720600 | 1.91877100  |
| H | 4.90869400  | -1.86135500 | 0.87372300  |
| C | 1.72795800  | 1.59375500  | -1.00541000 |
| H | 2.60288500  | 2.23238400  | -0.81315800 |
| H | 1.99477800  | 0.87735000  | -1.78877600 |
| O | -0.70710200 | 2.13062100  | 0.34791800  |
| O | 0.64484000  | 2.33786100  | -1.51303300 |
| C | -0.07277300 | 3.05815200  | -0.52522600 |
| C | -1.18490100 | 3.78344200  | -1.24973500 |
| H | -1.83667200 | 4.27356600  | -0.52390400 |
| H | -1.76702000 | 3.06184800  | -1.82685900 |
| C | 0.82829700  | 3.99815800  | 0.27054000  |
| H | 1.51759100  | 3.45559500  | 0.92274300  |
| H | 0.20592600  | 4.63856500  | 0.89857500  |

|    |             |             |             |
|----|-------------|-------------|-------------|
| H  | 1.40619600  | 4.62422700  | -0.41434000 |
| C  | -0.69451200 | -0.64521800 | -0.17824900 |
| H  | -0.92503900 | -0.03752600 | -1.06697400 |
| C  | -1.88413200 | -1.00150000 | 0.71842600  |
| O  | 0.17453900  | -1.57522300 | -0.23202200 |
| C  | 3.37351300  | -1.25890200 | -1.14668500 |
| O  | 2.21776300  | -1.70270200 | -1.56279400 |
| O  | 4.41518300  | -1.47746900 | -1.73946000 |
| H  | 1.35286300  | -1.55961100 | -0.96019000 |
| H  | -0.76362600 | 4.53440200  | -1.92130200 |
| C  | -2.50343200 | -2.33633900 | 0.29978200  |
| H  | -3.32906100 | -2.55927600 | 0.98481700  |
| H  | -1.56495100 | -1.06613500 | 1.75989200  |
| C  | -2.98760100 | -2.40128700 | -1.14698000 |
| H  | -2.15476000 | -2.16959900 | -1.82184400 |
| H  | -1.72763600 | -3.09425800 | 0.45981700  |
| H  | -3.75391500 | -1.63582600 | -1.31155200 |
| C  | -3.54887600 | -3.77959700 | -1.49006000 |
| H  | -2.78675700 | -4.55480100 | -1.36013600 |
| H  | -4.39486500 | -4.02870300 | -0.84085300 |
| H  | -3.89640900 | -3.81893400 | -2.52573500 |
| Br | -3.24900700 | 0.40208600  | 0.70263600  |

(S)-TS3<sub>o</sub>-Br-P

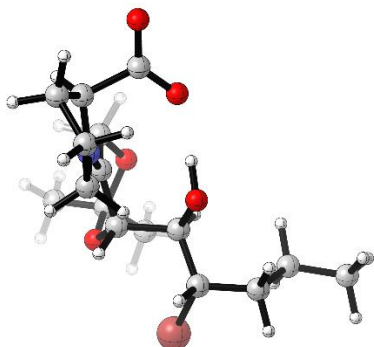

-----  
- Thermochemistry -  
-----

|                                              |                             |
|----------------------------------------------|-----------------------------|
| Zero-point correction=                       | 0.420095 (Hartree/Particle) |
| Thermal correction to Energy=                | 0.440117                    |
| Thermal correction to Enthalpy=              | 0.440982                    |
| Thermal correction to Gibbs Free Energy=     | 0.373188                    |
| Sum of electronic and zero-point Energies=   | -3627.243178                |
| Sum of electronic and thermal Energies=      | -3627.223155                |
| Sum of electronic and thermal Enthalpies=    | -3627.222290                |
| Sum of electronic and thermal Free Energies= | -3627.290085                |

Number of Imaginary Frequencies = 0

E (Single Point Energy) [IEFPCM<sub>(DCM)</sub>M06-2X/6-311++G(2d,2p)] = -3630.313357

|   |            |             |             |
|---|------------|-------------|-------------|
| C | 0.00981300 | 0.65707300  | 0.71609500  |
| H | 0.01494100 | 0.45437100  | 1.79214100  |
| C | 1.42009900 | 0.77764100  | 0.19882400  |
| N | 2.41188400 | 0.15625300  | 0.71816300  |
| C | 3.73735200 | 0.07407600  | 0.07497300  |
| H | 4.04750300 | 1.06102500  | -0.27600800 |
| C | 2.35423300 | -0.71133100 | 1.93269000  |
| H | 1.48578900 | -1.36428700 | 1.86945200  |
| H | 2.27384100 | -0.04660100 | 2.79797500  |
| C | 3.68940000 | -1.45423500 | 1.90268900  |
| H | 3.58826200 | -2.37783100 | 1.32483700  |

|   |             |             |             |
|---|-------------|-------------|-------------|
| H | 4.02212900  | -1.71060500 | 2.90888900  |
| C | 4.62777600  | -0.48103400 | 1.18368000  |
| H | 4.94357700  | 0.32252800  | 1.85596100  |
| H | 5.50977600  | -0.95884100 | 0.75862000  |
| C | 1.57038200  | 1.66123600  | -1.01146000 |
| H | 2.09309300  | 2.58582300  | -0.72569100 |
| H | 2.15068600  | 1.15187500  | -1.78273000 |
| O | -0.60958800 | 1.91886400  | 0.58799900  |
| O | 0.29754800  | 1.90100600  | -1.56236900 |
| C | -0.61586100 | 2.55830000  | -0.69893200 |
| C | -1.97883000 | 2.45022500  | -1.35917000 |
| H | -2.73458900 | 2.88708100  | -0.70338000 |
| H | -2.24568600 | 1.40961600  | -1.55012700 |
| C | -0.22928300 | 4.00910300  | -0.45063900 |
| H | 0.73892500  | 4.08692100  | 0.04848600  |
| H | -0.97754300 | 4.47269600  | 0.19585400  |
| H | -0.19468400 | 4.54876900  | -1.39952200 |
| C | -0.67932800 | -0.54695400 | -0.01979900 |
| H | -1.01835900 | -0.19437100 | -0.99950000 |
| C | -1.84966000 | -1.13554900 | 0.77093200  |
| O | 0.21521000  | -1.62736000 | -0.13888200 |
| C | 3.65502400  | -0.89608700 | -1.17157200 |
| O | 2.51067300  | -1.26904000 | -1.54040500 |
| O | 4.75854600  | -1.16271800 | -1.66522600 |
| H | 0.97470300  | -1.44370800 | -0.74307900 |
| H | -1.96299900 | 2.99530900  | -2.30615300 |
| C | -2.50374500 | -2.32660500 | 0.07946700  |
| H | -3.35140800 | -2.65192100 | 0.69269800  |

|    |             |             |             |
|----|-------------|-------------|-------------|
| H  | -1.49295100 | -1.43094700 | 1.76070300  |
| C  | -2.96532800 | -2.07360300 | -1.35461000 |
| H  | -2.09608400 | -1.86178500 | -1.98817600 |
| H  | -1.76710800 | -3.13768900 | 0.08635800  |
| H  | -3.60879900 | -1.18560600 | -1.38426200 |
| C  | -3.71671300 | -3.27597800 | -1.92263100 |
| H  | -3.08543400 | -4.17043200 | -1.90965700 |
| H  | -4.61348800 | -3.48980800 | -1.33202300 |
| H  | -4.02679100 | -3.09775900 | -2.95553600 |
| Br | -3.20233100 | 0.23567800  | 1.15041700  |

(R)-TS3<sub>T</sub>-Br-Pre

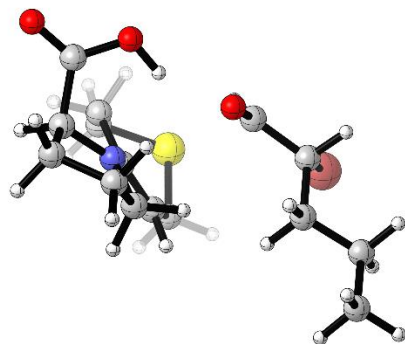

-----  
 - Thermochemistry -  
 -----

|                                              |                             |
|----------------------------------------------|-----------------------------|
| Zero-point correction=                       | 0.381545 (Hartree/Particle) |
| Thermal correction to Energy=                | 0.401448                    |
| Thermal correction to Enthalpy=              | 0.402313                    |
| Thermal correction to Gibbs Free Energy=     | 0.333150                    |
| Sum of electronic and zero-point Energies=   | -3835.740937                |
| Sum of electronic and thermal Energies=      | -3835.721034                |
| Sum of electronic and thermal Enthalpies=    | -3835.720169                |
| Sum of electronic and thermal Free Energies= | -3835.789332                |

Number of Imaginary Frequencies = 0

E (Single Point Energy) [IEFPCM(DCM)M06-2X/6-311++G(2d,2p)] = -3838.751494

|   |             |             |             |
|---|-------------|-------------|-------------|
| C | 0.16611900  | -0.73447000 | -1.56665300 |
| H | -0.13813400 | 0.17306800  | -2.07953700 |
| C | 1.31562900  | -0.73116800 | -0.85489900 |
| N | 2.02960100  | 0.44574900  | -0.62923100 |
| C | 3.46648800  | 0.45713400  | -0.36385800 |
| H | 4.01195700  | -0.31267200 | -0.91817900 |
| C | 1.59154300  | 1.70444500  | -1.23101100 |
| H | 1.58211200  | 1.63406000  | -2.33062600 |
| H | 0.58048700  | 1.94644200  | -0.89221400 |
| C | 2.64240900  | 2.69822900  | -0.75285500 |
| H | 2.68869700  | 3.59273800  | -1.37626300 |
| H | 2.42585200  | 3.00390800  | 0.27661800  |
| C | 3.92428000  | 1.86487000  | -0.81575200 |
| H | 4.27839600  | 1.80054800  | -1.84823100 |
| H | 4.73956500  | 2.24909000  | -0.19980900 |
| C | 1.86142400  | -1.95437400 | -0.14651900 |
| H | 2.94292500  | -2.02342200 | -0.30942100 |
| H | 1.71735300  | -1.83245100 | 0.93606100  |
| C | -0.71738800 | 0.27859400  | 1.35976500  |
| H | -0.55785600 | -0.80929900 | 1.45018200  |
| C | -2.12390700 | 0.76618200  | 1.06119900  |
| O | 0.17728000  | 1.07889000  | 1.53845400  |
| C | 3.80629200  | 0.24527200  | 1.11340900  |
| O | 2.84275600  | 0.46822200  | 2.00136400  |
| O | 4.92234000  | -0.06950500 | 1.46674600  |
| H | 1.97992000  | 0.67161100  | 1.57380500  |
| C | -2.18208600 | 1.78966700  | -0.06376200 |
| H | -1.87611200 | 1.31123400  | -1.00193400 |



|    |             |             |             |
|----|-------------|-------------|-------------|
| C  | -3.54486400 | 2.45703300  | -0.22739600 |
| H  | -1.42895700 | 2.55069000  | 0.17990800  |
| C  | -3.48864100 | 3.59960300  | -1.23885800 |
| H  | -4.47055000 | 4.06255800  | -1.36557600 |
| H  | -2.78799800 | 4.37573400  | -0.91526600 |
| H  | -3.15978600 | 3.23622000  | -2.21800200 |
| H  | -3.87778600 | 2.83607500  | 0.74688300  |
| H  | -4.28063800 | 1.71048300  | -0.54421800 |
| H  | -2.51653400 | 1.19588900  | 1.98849600  |
| C  | 1.24166800  | -3.26947300 | -0.60103900 |
| C  | -0.74790500 | -1.91156500 | -1.78203800 |
| H  | 1.54407600  | -3.50939200 | -1.62534400 |
| H  | 1.56815400  | -4.08395400 | 0.04809600  |
| H  | -1.79097400 | -1.58591700 | -1.73824800 |
| H  | -0.59101400 | -2.35918000 | -2.77108200 |
| S  | -0.57091500 | -3.21217000 | -0.52499700 |
| Br | -3.27031700 | -0.76972300 | 0.69564500  |

(*R*)-TS3<sub>T</sub>-Br

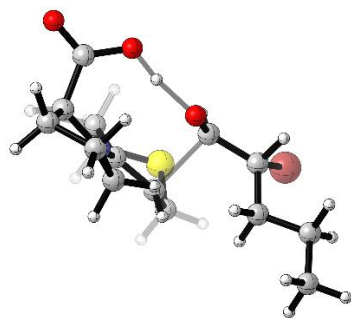

-----  
 - Thermochemistry -  
 -----

Zero-point correction=  
 Thermal correction to Energy=

0.381398 (Hartree/Particle)  
 0.399667

|                                              |              |
|----------------------------------------------|--------------|
| Thermal correction to Enthalpy=              | 0.400532     |
| Thermal correction to Gibbs Free Energy=     | 0.336120     |
| Sum of electronic and zero-point Energies=   | -3835.728424 |
| Sum of electronic and thermal Energies=      | -3835.710155 |
| Sum of electronic and thermal Enthalpies=    | -3835.709290 |
| Sum of electronic and thermal Free Energies= | -3835.773702 |

Number of Imaginary Frequencies = 1

E (Single Point Energy) [IEFPCM(DCM)M06-2X/6-311++G(2d,2p)] = -3838.736601

|   |             |             |             |
|---|-------------|-------------|-------------|
| C | -0.03723100 | 0.38538900  | 1.18289100  |
| H | -0.26996500 | -0.57105900 | 1.63951300  |
| C | 1.30865800  | 0.60493300  | 0.87877200  |
| N | 2.14925400  | -0.43154000 | 0.75390200  |
| C | 3.52606500  | -0.33480200 | 0.25621000  |
| H | 4.07488600  | 0.46803500  | 0.75164600  |
| C | 1.82801600  | -1.80509500 | 1.20077000  |
| H | 1.85064400  | -1.83421300 | 2.29776700  |
| H | 0.84358500  | -2.10271900 | 0.84721000  |
| C | 2.93795800  | -2.64556700 | 0.58092500  |
| H | 3.10812300  | -3.57166500 | 1.13187200  |
| H | 2.67287000  | -2.89858100 | -0.45108600 |
| C | 4.13987400  | -1.70219500 | 0.61174400  |
| H | 4.55597400  | -1.65086600 | 1.62188500  |
| H | 4.94023600  | -1.97445500 | -0.07759600 |
| C | 1.82024300  | 1.96576200  | 0.45921500  |
| H | 2.87098300  | 2.06720900  | 0.74274700  |
| H | 1.78390200  | 2.01840300  | -0.63878000 |
| C | -0.47081800 | -0.17020200 | -0.88168000 |
| H | -0.37695000 | 0.87444100  | -1.20930900 |
| C | -1.90568800 | -0.70268100 | -0.80780000 |
| O | 0.39061400  | -1.02931100 | -1.23071600 |

|    |             |             |             |
|----|-------------|-------------|-------------|
| C  | 3.63701800  | -0.06029300 | -1.25371000 |
| O  | 2.59441000  | -0.25754600 | -2.02174500 |
| O  | 4.71065800  | 0.30803000  | -1.69545000 |
| H  | 1.68987700  | -0.58248200 | -1.59229000 |
| C  | -2.25140000 | -1.64019700 | 0.33462600  |
| H  | -2.36638200 | -1.07177100 | 1.26432500  |
| C  | -3.50089100 | -2.48283000 | 0.09041000  |
| H  | -1.38832500 | -2.31004600 | 0.45864800  |
| C  | -3.73265200 | -3.47816600 | 1.22499200  |
| H  | -4.63244600 | -4.07385300 | 1.05129000  |
| H  | -2.88628100 | -4.16567200 | 1.32208900  |
| H  | -3.85406000 | -2.95661400 | 2.18005600  |
| H  | -3.39361600 | -3.01774900 | -0.86100700 |
| H  | -4.36950700 | -1.82289700 | -0.01184100 |
| H  | -2.04327100 | -1.22361100 | -1.75964100 |
| C  | 1.05633200  | 3.14628900  | 1.05301700  |
| C  | -0.95767700 | 1.49566100  | 1.63661700  |
| H  | 1.21664400  | 3.20629200  | 2.13397500  |
| H  | 1.41743100  | 4.07478500  | 0.60761100  |
| H  | -2.00041300 | 1.20287500  | 1.50557400  |
| H  | -0.81396700 | 1.70105700  | 2.70441300  |
| S  | -0.72527800 | 3.04868000  | 0.72482000  |
| Br | -3.20064600 | 0.76661800  | -0.92434900 |

(R)-TS3<sub>T</sub>-Br-P

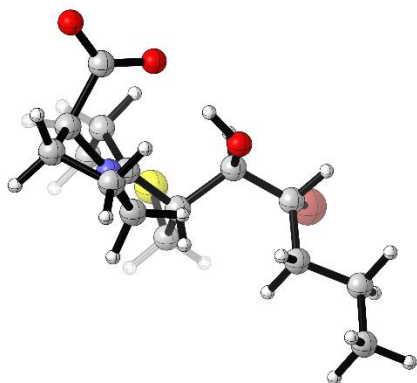

-----  
- Thermochemistry -  
-----

|                                              |                             |
|----------------------------------------------|-----------------------------|
| Zero-point correction=                       | 0.385865 (Hartree/Particle) |
| Thermal correction to Energy=                | 0.404170                    |
| Thermal correction to Enthalpy=              | 0.405035                    |
| Thermal correction to Gibbs Free Energy=     | 0.340446                    |
| Sum of electronic and zero-point Energies=   | -3835.756345                |
| Sum of electronic and thermal Energies=      | -3835.738040                |
| Sum of electronic and thermal Enthalpies=    | -3835.737175                |
| Sum of electronic and thermal Free Energies= | -3835.801764                |

Number of Imaginary Frequencies = 0

E (Single Point Energy) [IEFPCM<sub>(DCM)</sub>M06-2X/6-311++G(2d,2p)] = -3838.769308

|   |             |             |             |
|---|-------------|-------------|-------------|
| C | -0.07624000 | -0.22802700 | -0.73926600 |
| H | -0.15478700 | 0.70454200  | -1.30101000 |
| C | 1.38024000  | -0.58510000 | -0.58481800 |
| N | 2.28735300  | 0.32335600  | -0.72052700 |
| C | 3.69597300  | 0.15647800  | -0.29385400 |
| H | 4.11147800  | -0.76623600 | -0.69788900 |
| C | 2.03867500  | 1.74464000  | -1.12216800 |
| H | 1.88474500  | 1.75390400  | -2.20522100 |
| H | 1.15747400  | 2.12112800  | -0.60812500 |
| C | 3.31887700  | 2.47106500  | -0.71902400 |

|   |             |             |             |
|---|-------------|-------------|-------------|
| H | 3.49447900  | 3.34248000  | -1.35082700 |
| H | 3.24350600  | 2.80516500  | 0.32030500  |
| C | 4.39372500  | 1.39402000  | -0.85373000 |
| H | 4.65469700  | 1.23711700  | -1.90490700 |
| H | 5.30337400  | 1.60499300  | -0.29167200 |
| C | 1.72890900  | -1.97367200 | -0.12385900 |
| H | 2.80470100  | -2.14141200 | -0.15155400 |
| H | 1.42814700  | -2.03691500 | 0.92949500  |
| C | -0.59226700 | 0.05989300  | 0.71289000  |
| H | -0.56814500 | -0.87035100 | 1.29361000  |
| C | -2.01773300 | 0.63311100  | 0.76448500  |
| O | 0.20789700  | 1.05421700  | 1.31002300  |
| C | 3.76458000  | 0.09133600  | 1.27659900  |
| O | 2.67573400  | 0.12869100  | 1.90994200  |
| O | 4.91683200  | -0.00110800 | 1.72318100  |
| H | 1.09435100  | 0.69561700  | 1.56624800  |
| C | -2.33163300 | 1.67807900  | -0.29006700 |
| H | -2.40032400 | 1.20925300  | -1.27965700 |
| C | -3.59558800 | 2.48968700  | -0.01753600 |
| H | -1.47022600 | 2.36228900  | -0.31122600 |
| C | -3.75656800 | 3.62856700  | -1.02190200 |
| H | -4.67109300 | 4.19656000  | -0.83288900 |
| H | -2.91132500 | 4.32204600  | -0.96742500 |
| H | -3.80791800 | 3.23993100  | -2.04438100 |
| H | -3.54841900 | 2.89230000  | 1.00160200  |
| H | -4.46798000 | 1.82861500  | -0.05701100 |
| H | -2.13304500 | 1.05338900  | 1.76453300  |
| C | 1.02749400  | -3.07904600 | -0.92285700 |

|    |             |             |             |
|----|-------------|-------------|-------------|
| C  | -0.85485600 | -1.28309200 | -1.53952400 |
| H  | 1.34455500  | -3.06650600 | -1.97011400 |
| H  | 1.30241500  | -4.04633900 | -0.49938200 |
| H  | -1.90530500 | -0.99952500 | -1.60459000 |
| H  | -0.46038600 | -1.31991700 | -2.56010400 |
| S  | -0.77902600 | -2.95095500 | -0.83151100 |
| Br | -3.37192200 | -0.79463900 | 0.72607600  |

(S)-TS3<sub>T</sub>-Br-Pre

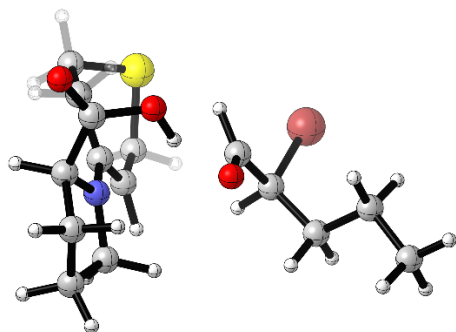

-----  
 - Thermochemistry -  
 -----

|                                              |                             |
|----------------------------------------------|-----------------------------|
| Zero-point correction=                       | 0.381486 (Hartree/Particle) |
| Thermal correction to Energy=                | 0.401339                    |
| Thermal correction to Enthalpy=              | 0.402204                    |
| Thermal correction to Gibbs Free Energy=     | 0.333301                    |
| Sum of electronic and zero-point Energies=   | -3835.739356                |
| Sum of electronic and thermal Energies=      | -3835.719503                |
| Sum of electronic and thermal Enthalpies=    | -3835.718638                |
| Sum of electronic and thermal Free Energies= | -3835.787541                |

Number of Imaginary Frequencies = 0

E (Single Point Energy) [IEFPCM<sub>(DCM)</sub>M06-2X/6-311++G(2d,2p)] = -3838.749560

|   |            |            |            |
|---|------------|------------|------------|
| C | 0.61431800 | 1.18659700 | 1.51918800 |
| H | 0.31943600 | 0.48499200 | 2.29374500 |
| C | 1.62646200 | 0.85395000 | 0.68227400 |

|   |             |             |             |
|---|-------------|-------------|-------------|
| N | 2.22009200  | -0.40125800 | 0.72909600  |
| C | 3.41035700  | -0.77213100 | -0.02469600 |
| H | 4.27597500  | -0.13365300 | 0.19534200  |
| C | 1.99904700  | -1.28824300 | 1.87752800  |
| H | 1.06231800  | -1.84744500 | 1.75021100  |
| H | 1.92424700  | -0.70119100 | 2.79921400  |
| C | 3.22967400  | -2.19734000 | 1.89499700  |
| H | 3.00912900  | -3.19264300 | 2.28450500  |
| H | 4.01096900  | -1.74958400 | 2.51668100  |
| C | 3.67789100  | -2.21886400 | 0.43535800  |
| H | 4.72332500  | -2.49602600 | 0.29373400  |
| H | 3.05242800  | -2.90945800 | -0.14157400 |
| C | 2.13268800  | 1.77347500  | -0.41064900 |
| H | 3.22926300  | 1.75643000  | -0.41256700 |
| H | 1.80776900  | 1.39475300  | -1.38854000 |
| C | -0.90017600 | -0.46139700 | -0.47176800 |
| H | -0.64780300 | 0.44880400  | -1.04059500 |
| C | -2.11291000 | -0.38422800 | 0.43661000  |
| O | -0.24120700 | -1.47907100 | -0.56134500 |
| C | 3.23349600  | -0.76899200 | -1.53973200 |
| O | 2.04126600  | -1.11670200 | -2.01712500 |
| O | 4.15589000  | -0.52715900 | -2.28699100 |
| H | 1.35968400  | -1.26133500 | -1.31895800 |
| C | -2.76592100 | -1.72351800 | 0.73391400  |
| H | -3.52773200 | -1.57472100 | 1.50589100  |
| H | -1.79576800 | 0.09587200  | 1.36437300  |
| C | -3.37121400 | -2.42820300 | -0.47872100 |
| H | -2.63532000 | -2.45868100 | -1.29063000 |

|    |             |             |             |
|----|-------------|-------------|-------------|
| H  | -1.97860200 | -2.35150000 | 1.17104900  |
| H  | -4.22402400 | -1.84747600 | -0.84570500 |
| C  | -3.81774700 | -3.84825500 | -0.13945600 |
| H  | -2.96835100 | -4.45769000 | 0.18522000  |
| H  | -4.27220500 | -4.33587100 | -1.00563900 |
| H  | -4.55574000 | -3.84260300 | 0.66954400  |
| C  | 1.68386800  | 3.22141000  | -0.26623200 |
| C  | -0.18231400 | 2.46458000  | 1.49968300  |
| H  | 2.15238800  | 3.69319700  | 0.60319700  |
| H  | 1.96273200  | 3.79142400  | -1.15416300 |
| H  | -1.24200300 | 2.25246200  | 1.68327600  |
| H  | 0.13816400  | 3.15293200  | 2.29108000  |
| S  | -0.11935900 | 3.34192300  | -0.09139100 |
| Br | -3.34868300 | 0.91307100  | -0.34903500 |

(S)-TS3<sub>T</sub>-Br

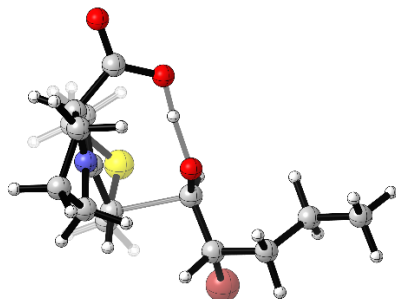

-----  
 - Thermochemistry -  
 -----

|                                              |                             |
|----------------------------------------------|-----------------------------|
| Zero-point correction=                       | 0.381390 (Hartree/Particle) |
| Thermal correction to Energy=                | 0.399623                    |
| Thermal correction to Enthalpy=              | 0.400488                    |
| Thermal correction to Gibbs Free Energy=     | 0.335584                    |
| Sum of electronic and zero-point Energies=   | -3835.726988                |
| Sum of electronic and thermal Energies=      | -3835.708754                |
| Sum of electronic and thermal Enthalpies=    | -3835.707889                |
| Sum of electronic and thermal Free Energies= | -3835.772793                |



Number of Imaginary Frequencies = 1

E (Single Point Energy) [IEFPCM(DCM)M06-2X/6-311++G(2d,2p)] = -3838.734863

|   |             |             |             |
|---|-------------|-------------|-------------|
| C | 0.15960300  | 1.24443200  | 0.89491700  |
| H | -0.11313200 | 0.81527300  | 1.85575800  |
| C | 1.45265600  | 0.96146400  | 0.42908300  |
| N | 2.09999900  | -0.11732400 | 0.87365600  |
| C | 3.33121800  | -0.67037600 | 0.28789500  |
| H | 4.17250400  | 0.01107900  | 0.45290600  |
| C | 1.71588900  | -0.83593700 | 2.10863900  |
| H | 0.85366000  | -1.47672100 | 1.90419500  |
| H | 1.45570100  | -0.11225500 | 2.88463500  |
| C | 2.96275500  | -1.64718300 | 2.44902300  |
| H | 2.72505900  | -2.53621900 | 3.03482300  |
| H | 3.66778600  | -1.03318500 | 3.01762600  |
| C | 3.53970900  | -1.97740300 | 1.07430000  |
| H | 4.59128000  | -2.26498000 | 1.08867600  |
| H | 2.96126800  | -2.78175600 | 0.60639200  |
| C | 2.07013900  | 1.69728700  | -0.74082200 |
| H | 3.16064200  | 1.67616100  | -0.64182300 |
| H | 1.82100800  | 1.15142200  | -1.65990700 |
| C | -0.74661200 | -0.31801900 | -0.26217800 |
| H | -0.95615500 | 0.39130600  | -1.07556000 |
| C | -1.93210900 | -0.72554600 | 0.62179700  |
| O | 0.08787600  | -1.26050900 | -0.42681800 |
| C | 3.29134400  | -0.97729600 | -1.21340300 |
| O | 2.14820500  | -1.30104800 | -1.76415200 |
| O | 4.33963000  | -0.97604500 | -1.83333000 |

|    |             |             |             |
|----|-------------|-------------|-------------|
| H  | 1.28160400  | -1.23676100 | -1.16754400 |
| C  | -2.52322700 | -2.06455500 | 0.17957700  |
| H  | -3.33979400 | -2.32046300 | 0.86403100  |
| H  | -1.63016700 | -0.79135800 | 1.66725400  |
| C  | -3.01215400 | -2.11222600 | -1.26627400 |
| H  | -2.19735700 | -1.81409900 | -1.93671600 |
| H  | -1.72893100 | -2.80656500 | 0.32114400  |
| H  | -3.82036600 | -1.38576800 | -1.40397600 |
| C  | -3.49986900 | -3.50785600 | -1.64921400 |
| H  | -2.69410100 | -4.24280800 | -1.55358200 |
| H  | -3.85776300 | -3.53238600 | -2.68179600 |
| H  | -4.32248100 | -3.82559500 | -0.99982200 |
| C  | 1.62291400  | 3.14633500  | -0.89624900 |
| C  | -0.46989100 | 2.60387000  | 0.66242500  |
| H  | 1.97524500  | 3.76045000  | -0.06186200 |
| H  | 2.03581100  | 3.55866100  | -1.81827000 |
| H  | -1.54869800 | 2.54795400  | 0.79242800  |
| H  | -0.09073700 | 3.32837300  | 1.39328300  |
| S  | -0.18330100 | 3.27642400  | -0.99709900 |
| Br | -3.32996900 | 0.64907400  | 0.60208600  |

(S)-TS3<sub>T</sub>-Br-P

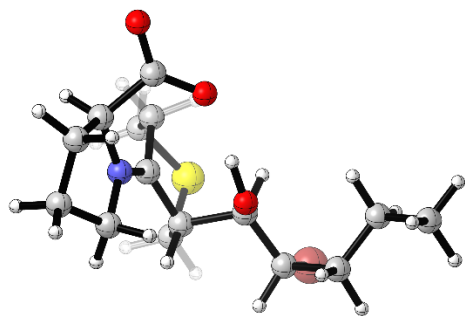

-----  
- Thermochemistry -  
-----

|                                              |                             |
|----------------------------------------------|-----------------------------|
| Zero-point correction=                       | 0.385686 (Hartree/Particle) |
| Thermal correction to Energy=                | 0.403933                    |
| Thermal correction to Enthalpy=              | 0.404798                    |
| Thermal correction to Gibbs Free Energy=     | 0.339970                    |
| Sum of electronic and zero-point Energies=   | -3835.752925                |
| Sum of electronic and thermal Energies=      | -3835.734678                |
| Sum of electronic and thermal Enthalpies=    | -3835.733813                |
| Sum of electronic and thermal Free Energies= | -3835.798642                |

Number of Imaginary Frequencies = 0

E (Single Point Energy) [IEFPCM<sub>(DCM)</sub>M06-2X/6-311++G(2d,2p)] = -3838.765953

|   |            |             |             |
|---|------------|-------------|-------------|
| C | 0.06751100 | 0.82466300  | 0.86564900  |
| H | 0.18700900 | 0.49091200  | 1.89930200  |
| C | 1.40991400 | 0.84505200  | 0.18105900  |
| N | 2.40849200 | 0.19946900  | 0.68367100  |
| C | 3.61784800 | -0.17506300 | -0.09764500 |
| H | 4.17475500 | 0.72875800  | -0.35456100 |
| C | 2.45730300 | -0.41063300 | 2.04203200  |
| H | 1.89306300 | -1.34732000 | 2.00950800  |
| H | 2.01075200 | 0.26721400  | 2.76778900  |
| C | 3.94832500 | -0.63866000 | 2.25151400  |
| H | 4.13279300 | -1.39133500 | 3.01908700  |
| H | 4.43112900 | 0.29552200  | 2.55410700  |

|   |             |             |             |
|---|-------------|-------------|-------------|
| C | 4.41997600  | -1.06812900 | 0.86379600  |
| H | 5.49156200  | -0.94706200 | 0.70704900  |
| H | 4.16273700  | -2.11797200 | 0.68905200  |
| C | 1.52097800  | 1.50786300  | -1.16447000 |
| H | 2.55933300  | 1.53780200  | -1.49712700 |
| H | 0.97108100  | 0.88983800  | -1.88394600 |
| C | -0.72707800 | -0.33160300 | 0.15496900  |
| H | -0.91227400 | -0.06704100 | -0.89471400 |
| C | -2.07564600 | -0.61379300 | 0.84886700  |
| O | 0.03249500  | -1.51080300 | 0.25676900  |
| C | 3.24498300  | -0.95572100 | -1.39415300 |
| O | 2.07753800  | -1.42628300 | -1.47510900 |
| O | 4.17922600  | -1.06671000 | -2.20197500 |
| H | 0.77550100  | -1.50570400 | -0.40053700 |
| C | -2.58431500 | -2.03690100 | 0.64874900  |
| H | -3.52871700 | -2.13889800 | 1.19545800  |
| H | -2.00754800 | -0.39806600 | 1.91801700  |
| C | -2.77300800 | -2.46165000 | -0.80604700 |
| H | -1.84208100 | -2.28767800 | -1.35711300 |
| H | -1.85475700 | -2.69865800 | 1.12726900  |
| H | -3.54506900 | -1.84018700 | -1.27256100 |
| C | -3.15947400 | -3.93507200 | -0.91614100 |
| H | -2.37854800 | -4.57527200 | -0.49304400 |
| H | -3.30696700 | -4.22824100 | -1.95891100 |
| H | -4.08957700 | -4.13757300 | -0.37433100 |
| C | 0.95139100  | 2.93271000  | -1.16992200 |
| C | -0.58165000 | 2.21463400  | 0.90518400  |
| H | 1.51391700  | 3.58201700  | -0.49205800 |

|    |             |            |             |
|----|-------------|------------|-------------|
| H  | 1.03915800  | 3.34165400 | -2.17765200 |
| H  | -1.55901400 | 2.16126100 | 1.38371300  |
| H  | 0.04319600  | 2.87982700 | 1.51004200  |
| S  | -0.80718000 | 2.96750300 | -0.73009300 |
| Br | -3.45835500 | 0.64211600 | 0.21010900  |

## Summary of Transition State Energies

**Supplementary Table 13.** Energies of all transition states for enamine addition to 2-chloropentanal. Reported relative Gibbs free energies for structures optimized at the IEFPCM<sub>(DCM)</sub>M06-2X/6-311++G(2d,2p)//IEFPCM<sub>(DCM)</sub>M06-2X/6-31+G(d,p) level of theory represent the sum of the thermal correction to Gibbs free energy computed at the IEFPCM<sub>(DCM)</sub>M06-2X/6-31+G(d,p) level of theory and single point energies computed at the IEFPCM<sub>(DCM)</sub>M06-2X/6-311++G(2d,2p). All energies are reported in Hartree except the relative energies.

| Structure                | Gibbs Free Energies (G), IEFPCM <sub>(DCM)</sub> M06-2X/6-31+G(d,p) | Thermal Corrections to Gibbs Free Energies, IEFPCM <sub>(DCM)</sub> M06-2X/6-31+G(d,p) | Single Point Energies, E IEFPCM <sub>(DCM)</sub> M06-2X/6-311++G(2d,2p) | Gibbs Free Energies (G), IEFPCM <sub>(DCM)</sub> M06-2X/6-311++G(2d,2p)//IEFPCM <sub>(DCM)</sub> M06-2X/6-31+G(d,p) | Relative Energies to (R)-TS1 <sub>P</sub> -Cl (Kcal/mol) |
|--------------------------|---------------------------------------------------------------------|----------------------------------------------------------------------------------------|-------------------------------------------------------------------------|---------------------------------------------------------------------------------------------------------------------|----------------------------------------------------------|
| (R)-TS1 <sub>P</sub> -Cl | -1401.164861                                                        | 0.340985                                                                               | -1401.797805                                                            | -1401.45682                                                                                                         | 0                                                        |
| (S)-TS1 <sub>P</sub> -Cl | -1401.159001                                                        | 0.341063                                                                               | -1401.791734                                                            | -1401.450671                                                                                                        | 3.85855776                                               |
| (R)-TS2 <sub>P</sub> -Cl | -1401.156596                                                        | 0.341689                                                                               | -1401.790092                                                            | -1401.448403                                                                                                        | 5.281749987                                              |
| (S)-TS2 <sub>P</sub> -Cl | -1401.164151                                                        | 0.340244                                                                               | -1401.796294                                                            | -1401.45605                                                                                                         | 0.483182546                                              |
| (R)-TS3 <sub>P</sub> -Cl | -1401.159118                                                        | 0.341323                                                                               | -1401.792111                                                            | 0.341323                                                                                                            | 3.785139114                                              |
| (S)-TS3 <sub>P</sub> -Cl | -1401.159908                                                        | 0.340366                                                                               | -1401.791658                                                            | -1401.451292                                                                                                        | 3.468874174                                              |

**Supplementary Table 14.** Energies of all transition states for enamine addition to 2-chloropentanal. Reported relative Gibbs free energies for structures optimized at the IEFPCM<sub>(DCM)</sub>M06-2X/6-311++G(2d,2p)//IEFPCM<sub>(DCM)</sub>M06-2X/6-31+G(d,p) level of theory represent the sum of the thermal correction to Gibbs free energy computed at the IEFPCM<sub>(DCM)</sub>M06-2X/6-31+G(d,p) level of theory and single point energies computed at the IEFPCM<sub>(DCM)</sub>M06-2X/6-311++G(2d,2p). All energies are reported in Hartree except the relative energies.

| Structure                | Gibbs Free Energies (G), IEFPCM <sub>(DCM)</sub> M06-2X/6-31+G(d,p) | Thermal Corrections to Gibbs Free Energies, IEFPCM <sub>(DCM)</sub> M06-2X/6-31+G(d,p) | Single Point Energies, E IEFPCM <sub>(DCM)</sub> M06-2X/6-311++G(2d,2p) | Gibbs Free Energies (G), IEFPCM <sub>(DCM)</sub> M06-2X/6-311++G(2d,2p)//IEFPCM <sub>(DCM)</sub> M06-2X/6-31+G(d,p) | Relative Energies to (R)-TS1 <sub>G</sub> -Cl (Kcal/mol) |
|--------------------------|---------------------------------------------------------------------|----------------------------------------------------------------------------------------|-------------------------------------------------------------------------|---------------------------------------------------------------------------------------------------------------------|----------------------------------------------------------|
| (R)-TS1 <sub>G</sub> -Cl | -1365.252009                                                        | 0.36506                                                                                | -1365.894619                                                            | -1365.529559                                                                                                        | 0                                                        |
| (S)-TS1 <sub>G</sub> -Cl | -1365.245974                                                        | 0.364994                                                                               | -1365.888191                                                            | -1365.523197                                                                                                        | 3.992217348                                              |

|                          |              |          |              |              |             |
|--------------------------|--------------|----------|--------------|--------------|-------------|
| (R)-TS2 <sub>G</sub> -Cl | -1365.244059 | 0.365714 | -1365.887212 | -1365.521498 | 1.06613915  |
| (S)-TS2 <sub>G</sub> -Cl | -1365.251485 | 0.364656 | -1365.893626 | -1365.52897  | 0.369603272 |
| (R)-TS3 <sub>G</sub> -Cl | -1365.246524 | 0.364421 | -1365.888196 | -1365.523775 | 3.629516683 |
| (S)-TS3 <sub>G</sub> -Cl | -1365.247432 | 0.364491 | -1365.88909  | -1365.524599 | 3.112448608 |

**Supplementary Table 15.** Energies of all transition states for enamine addition to 2-chloropentanal. Reported relative Gibbs free energies for structures optimized at the IEFPCM<sub>(DCM)</sub>M06-2X/6-311++G(2d,2p)//IEFPCM<sub>(DCM)</sub>M06-2X/6-31+G(d,p) level of theory represent the sum of the thermal correction to Gibbs free energy computed at the IEFPCM<sub>(DCM)</sub>M06-2X/6-31+G(d,p) level of theory and single point energies computed at the IEFPCM<sub>(DCM)</sub>M06-2X/6-311++G(2d,2p). All energies are reported in Hartree except the relative energies.

| Structure                | Gibbs Free Energies (G), IEFPCM <sub>(DCM)</sub> M06-2X/6-31+G(d,p) | Thermal Corrections to Gibbs Free Energies, IEFPCM <sub>(DCM)</sub> M06-2X/6-31+G(d,p) | Single Point Energies, E IEFPCM <sub>(DCM)</sub> M06-2X/6-311++G(2d,2p) | Gibbs Free Energies (G), IEFPCM <sub>(DCM)</sub> M06-2X/6-311++G(2d,2p)//IEFPCM <sub>(DCM)</sub> M06-2X/6-31+G(d,p) | Relative Energies to (R)-TS1 <sub>O</sub> -Cl (Kcal/mol) |
|--------------------------|---------------------------------------------------------------------|----------------------------------------------------------------------------------------|-------------------------------------------------------------------------|---------------------------------------------------------------------------------------------------------------------|----------------------------------------------------------|
| (R)-TS1 <sub>O</sub> -Cl | -1515.632299                                                        | 0.369496                                                                               | -1516.327244                                                            | -1515.957748                                                                                                        | 0                                                        |
| (S)-TS1 <sub>O</sub> -Cl | -1515.628417                                                        | 0.369358                                                                               | -1516.322975                                                            | -1515.953617                                                                                                        | 2.592242984                                              |
| (R)-TS2 <sub>O</sub> -Cl | -1515.62514                                                         | 0.369078                                                                               | -1516.319381                                                            | -1515.950303                                                                                                        | 4.671810461                                              |
| (S)-TS2 <sub>O</sub> -Cl | -1515.630967                                                        | 0.369297                                                                               | -1516.32557                                                             | -1515.956273                                                                                                        | 0.925576955                                              |
| (R)-TS3 <sub>O</sub> -Cl | -1515.625316                                                        | 0.36887                                                                                | -1516.319628                                                            | -1515.950758                                                                                                        | 4.386293502                                              |
| (S)-TS3 <sub>O</sub> -Cl | -1515.624654                                                        | 0.369175                                                                               | -1516.318913                                                            | -1515.949738                                                                                                        | 5.026353498                                              |

**Supplementary Table 16.** Energies of all transition states for enamine addition to 2-chloropentanal. Reported relative Gibbs free energies for structures optimized at the IEFPCM<sub>(DCM)</sub>M06-2X/6-311++G(2d,2p)//IEFPCM<sub>(DCM)</sub>M06-2X/6-31+G(d,p) level of theory represent the sum of the thermal correction to Gibbs free energy computed at the IEFPCM<sub>(DCM)</sub>M06-2X/6-31+G(d,p) level of theory and single point energies computed at the IEFPCM<sub>(DCM)</sub>M06-2X/6-311++G(2d,2p). All energies are reported in Hartree except the relative energies.

| Structure                | Gibbs Free Energies (G), IEFPCM <sub>(DCM)</sub> M06-2X/6-31+G(d,p) | Thermal Corrections to Gibbs Free Energies, IEFPCM <sub>(DCM)</sub> M06-2X/6-31+G(d,p) | Single Point Energies, E IEFPCM <sub>(DCM)</sub> M06-2X/6-311++G(2d,2p) | Gibbs Free Energies (G), IEFPCM <sub>(DCM)</sub> M06-2X/6-311++G(2d,2p)//IEFPCM <sub>(DCM)</sub> M06-2X/6-31+G(d,p) | Relative Energies to (R)-TS1 <sub>T</sub> -Cl (Kcal/mol) |
|--------------------------|---------------------------------------------------------------------|----------------------------------------------------------------------------------------|-------------------------------------------------------------------------|---------------------------------------------------------------------------------------------------------------------|----------------------------------------------------------|
| (R)-TS1 <sub>T</sub> -Cl | -1724.137252                                                        | 0.336803                                                                               | -1724.774436                                                            | -1724.437633                                                                                                        | 0                                                        |
| (S)-TS1 <sub>T</sub> -Cl | -1724.131053                                                        | 0.337056                                                                               | -1724.768234                                                            | -1724.431178                                                                                                        | 4.050575759                                              |
| (R)-TS2 <sub>T</sub> -Cl | -1724.128796                                                        | 0.337245                                                                               | -1724.766523                                                            | -1724.429278                                                                                                        | 5.242844379                                              |
| (S)-TS2 <sub>T</sub> -Cl | -1724.136217                                                        | 0.336784                                                                               | -1724.773577                                                            | -1724.436793                                                                                                        | 0.527108232                                              |
| (R)-TS3 <sub>T</sub> -Cl | -1724.132824                                                        | 0.336882                                                                               | -1724.769951                                                            | -1724.433069                                                                                                        | 2.863954727                                              |
| (S)-TS3 <sub>T</sub> -Cl | -1724.132677                                                        | 0.336822                                                                               | -1724.769924                                                            | -1724.433102                                                                                                        | 2.843246904                                              |

**Supplementary Table 17.** Energies of all transition states for enamine addition to 2-fluoropentanal. Reported relative Gibbs free energies for structures optimized at the IEFPCM<sub>(DCM)</sub>M06-2X/6-311++G(2d,2p)//IEFPCM<sub>(DCM)</sub>M06-2X/6-31+G(d,p) level of theory represent the sum of the thermal correction to Gibbs free energy computed at the IEFPCM<sub>(DCM)</sub>M06-2X/6-31+G(d,p) level of theory and single point energies computed at the IEFPCM<sub>(DCM)</sub>M06-2X/6-311++G(2d,2p). All energies are reported in Hartree except the relative energies.

| Structure               | Gibbs Free Energies (G), IEFPCM <sub>(DCM)</sub> M06-2X/6-31+G(d,p) | Thermal Corrections to Gibbs Free Energies, IEFPCM <sub>(DCM)</sub> M06-2X/6-31+G(d,p) | Single Point Energies, E IEFPCM <sub>(DCM)</sub> M06-2X/6-311++G(2d,2p) | Gibbs Free Energies (G), IEFPCM <sub>(DCM)</sub> M06-2X/6-311++G(2d,2p)//IEFPCM <sub>(DCM)</sub> M06-2X/6-31+G(d,p) | Relative Energies to (R)-TS1 <sub>P</sub> -F (Kcal/mol) |
|-------------------------|---------------------------------------------------------------------|----------------------------------------------------------------------------------------|-------------------------------------------------------------------------|---------------------------------------------------------------------------------------------------------------------|---------------------------------------------------------|
| (R)-TS1 <sub>P</sub> -F | -1040.805151                                                        | 0.342953                                                                               | -1041.438205                                                            | -1041.095252                                                                                                        | 0                                                       |
| (S)-TS1 <sub>P</sub> -F | -1040.79923                                                         | 0.343526                                                                               | -1041.432614                                                            | -1041.089088                                                                                                        | 3.867970407                                             |
| (R)-TS2 <sub>P</sub> -F | -1040.796259                                                        | 0.343633                                                                               | -1041.429464                                                            | -1041.085831                                                                                                        | 5.911769826                                             |
| (S)-TS2 <sub>P</sub> -F | -1040.801762                                                        | 0.34289                                                                                | -1041.434367                                                            | -1041.091477                                                                                                        | 2.368849495                                             |



|                         |              |          |              |              |             |
|-------------------------|--------------|----------|--------------|--------------|-------------|
| (R)-TS3 <sub>p</sub> -F | -1040.80187  | 0.343573 | -1041.435017 | -1041.091444 | 2.389557318 |
| (S)-TS3 <sub>p</sub> -F | -1040.804044 | 0.342145 | -1041.43582  | -1041.093675 | 0.989582955 |

**Supplementary Table 18.** Energies of all transition states for enamine addition to 2-fluoropentanal. Reported relative Gibbs free energies for structures optimized at the IEFPCM<sub>(DCM)</sub>M06-2X/6-311++G(2d,2p)//IEFPCM<sub>(DCM)</sub>M06-2X/6-31+G(d,p) level of theory represent the sum of the thermal correction to Gibbs free energy computed at the IEFPCM<sub>(DCM)</sub>M06-2X/6-31+G(d,p) level of theory and single point energies computed at the IEFPCM<sub>(DCM)</sub>M06-2X/6-311++G(2d,2p). All energies are reported in Hartree except the relative energies.

| Structure               | Gibbs Free Energies (G), IEFPCM <sub>(DCM)</sub> M06-2X/6-31+G(d,p) | Thermal Corrections to Gibbs Free Energies, IEFPCM <sub>(DCM)</sub> M06-2X/6-31+G(d,p) | Single Point Energies, E IEFPCM <sub>(DCM)</sub> M06-2X/6-311++G(2d,2p) | Gibbs Free Energies (G), IEFPCM <sub>(DCM)</sub> M06-2X/6-311++G(2d,2p)//IEFPCM <sub>(DCM)</sub> M06-2X/6-31+G(d,p) | Relative Energies to (R)-TS1 <sub>G</sub> -F (Kcal/mol) |
|-------------------------|---------------------------------------------------------------------|----------------------------------------------------------------------------------------|-------------------------------------------------------------------------|---------------------------------------------------------------------------------------------------------------------|---------------------------------------------------------|
| (R)-TS1 <sub>G</sub> -F | -1004.892614                                                        | 0.366742                                                                               | -1005.535067                                                            | -1005.168325                                                                                                        | 0                                                       |
| (S)-TS1 <sub>G</sub> -F | -1004.886483                                                        | 0.36724                                                                                | -1005.52915                                                             | -1005.16191                                                                                                         | 4.025475367                                             |
| (R)-TS2 <sub>G</sub> -F | -1004.883971                                                        | 0.367328                                                                               | -1005.526459                                                            | -1005.159131                                                                                                        | 5.769325101                                             |
| (S)-TS2 <sub>G</sub> -F | -1004.889686                                                        | 0.366632                                                                               | -1005.5316                                                              | -1005.164968                                                                                                        | 2.106550399                                             |
| (R)-TS3 <sub>G</sub> -F | -1004.888828                                                        | 0.367347                                                                               | -1005.531517                                                            | -1005.16417                                                                                                         | 2.607303219                                             |
| (S)-TS3 <sub>G</sub> -F | -1004.890519                                                        | 0.366469                                                                               | -1005.532406                                                            | -1005.165937                                                                                                        | 1.498493402                                             |

**Supplementary Table 19.** Energies of all transition states for enamine addition to 2-fluoropentanal. Reported relative Gibbs free energies for structures optimized at the IEFPCM<sub>(DCM)</sub>M06-2X/6-311++G(2d,2p)//IEFPCM<sub>(DCM)</sub>M06-2X/6-31+G(d,p) level of theory represent the sum of the thermal correction to Gibbs free energy computed at the IEFPCM<sub>(DCM)</sub>M06-2X/6-31+G(d,p) level of theory and single point energies computed at the IEFPCM<sub>(DCM)</sub>M06-2X/6-311++G(2d,2p). All energies are reported in Hartree except the relative energies.

| Structure               | Gibbs Free Energies (G), IEFPCM <sub>(DCM)</sub> M06-2X/6-31+G(d,p) | Thermal Corrections to Gibbs Free Energies, IEFPCM <sub>(DCM)</sub> M06-2X/6-31+G(d,p) | Single Point Energies, E IEFPCM <sub>(DCM)</sub> M06-2X/6-311++G(2d,2p) | Gibbs Free Energies (G), IEFPCM <sub>(DCM)</sub> M06-2X/6-311++G(2d,2p)//IEFPCM <sub>(DCM)</sub> M06-2X/6-31+G(d,p) | Relative Energies to (R)-TS1 <sub>O</sub> -F (Kcal/mol) |
|-------------------------|---------------------------------------------------------------------|----------------------------------------------------------------------------------------|-------------------------------------------------------------------------|---------------------------------------------------------------------------------------------------------------------|---------------------------------------------------------|
| (R)-TS1 <sub>O</sub> -F | -1155.272322                                                        | 0.371031                                                                               | -1155.966865                                                            | -1155.595834                                                                                                        | 0                                                       |

|                                 |              |          |              |              |             |
|---------------------------------|--------------|----------|--------------|--------------|-------------|
| (S)- <b>TS1</b> <sub>O</sub> -F | -1155.267711 | 0.371627 | -1155.962553 | -1155.590926 | 3.079818098 |
| (R)- <b>TS2</b> <sub>O</sub> -F | -1155.264945 | 0.371067 | -1155.958868 | -1155.587801 | 5.040786224 |
| (S)- <b>TS2</b> <sub>O</sub> -F | -1155.268666 | 0.371738 | -1155.963577 | -1155.591839 | 2.506901651 |
| (R)- <b>TS3</b> <sub>O</sub> -F | -1155.266603 | 0.370379 | -1155.960428 | -1155.590049 | 3.630144193 |
| (S)- <b>TS3</b> <sub>O</sub> -F | -1155.266948 | 0.370957 | -1155.961139 | -1155.590182 | 3.54668539  |

**Supplementary Table 20.** Energies of all transition states for enamine addition to 2-fluoropentanal. Reported relative Gibbs free energies for structures optimized at the IEFPCM<sub>(DCM)</sub>M06-2X/6-311++G(2d,2p)//IEFPCM<sub>(DCM)</sub>M06-2X/6-31+G(d,p) level of theory represent the sum of the thermal correction to Gibbs free energy computed at the IEFPCM<sub>(DCM)</sub>M06-2X/6-31+G(d,p) level of theory and single point energies computed at the IEFPCM<sub>(DCM)</sub>M06-2X/6-311++G(2d,2p). All energies are reported in Hartree except the relative energies.

| <b>Structure</b>                | <b>Gibbs Free Energies (G), IEFPCM<sub>(DCM)</sub>M06-2X/6-31+G(d,p)</b> | <b>Thermal Corrections to Gibbs Free Energies, IEFPCM<sub>(DCM)</sub>M06-2X/6-31+G(d,p)</b> | <b>Single Point Energies, E IEFPCM<sub>(DCM)</sub>M06-2X/6-311++G(2d,2p)</b> | <b>Gibbs Free Energies (G), IEFPCM<sub>(DCM)</sub>M06-2X/6-311++G(2d,2p)//IEFPCM<sub>(DCM)</sub>M06-2X/6-31+G(d,p)</b> | <b>Relative Energies to (R)-TS1<sub>T</sub>-F (Kcal/mol)</b> |
|---------------------------------|--------------------------------------------------------------------------|---------------------------------------------------------------------------------------------|------------------------------------------------------------------------------|------------------------------------------------------------------------------------------------------------------------|--------------------------------------------------------------|
| (R)- <b>TS1</b> <sub>T</sub> -F | -1363.777503                                                             | 0.338653                                                                                    | -1364.414632                                                                 | -1364.075979                                                                                                           | 0                                                            |
| (S)- <b>TS1</b> <sub>T</sub> -F | -1363.771275                                                             | 0.339218                                                                                    | -1364.408701                                                                 | -1364.069483                                                                                                           | 4.076303661                                                  |
| (R)- <b>TS2</b> <sub>T</sub> -F | -1363.768554                                                             | 0.339298                                                                                    | -1364.406058                                                                 | -1364.06676                                                                                                            | 5.785012846                                                  |
| (S)- <b>TS2</b> <sub>T</sub> -F | -1363.774512                                                             | 0.338699                                                                                    | -1364.411596                                                                 | -1364.072897                                                                                                           | 1.933985204                                                  |
| (R)- <b>TS3</b> <sub>T</sub> -F | -1363.775467                                                             | 0.338235                                                                                    | -1364.411768                                                                 | -1364.073533                                                                                                           | 1.534888971                                                  |
| (S)- <b>TS3</b> <sub>T</sub> -F | -1363.776417                                                             | 0.33776                                                                                     | -1364.412197                                                                 | -1364.074437                                                                                                           | 0.967620111                                                  |

**Supplementary Table 21.** Energies of all transition states for enamine addition to 2-bromopentanal. Reported relative Gibbs free energies for structures optimized at the IEFPCM<sub>(DCM)</sub>M06-2X/6-311++G(2d,2p)//IEFPCM<sub>(DCM)</sub>M06-2X/6-31+G(d,p) level of theory represent the sum of the thermal correction to Gibbs free energy computed at the IEFPCM<sub>(DCM)</sub>M06-2X/6-31+G(d,p) level of theory and single point energies computed at the IEFPCM<sub>(DCM)</sub>M06-2X/6-311++G(2d,2p). All energies are reported in Hartree except the relative energies.

| Structure                | Gibbs Free Energies (G), IEFPCM <sub>(DCM)</sub> M06-2X/6-31+G(d,p) | Thermal Corrections to Gibbs Free Energies, IEFPCM <sub>(DCM)</sub> M06-2X/6-31+G(d,p) | Single Point Energies, E IEFPCM <sub>(DCM)</sub> M06-2X/6-311++G(2d,2p) | Gibbs Free Energies (G), IEFPCM <sub>(DCM)</sub> M06-2X/6-311++G(2d,2p)//IEFPCM <sub>(DCM)</sub> M06-2X/6-31+G(d,p) | Relative Energies to (R)-TS1 <sub>P</sub> -Br (Kcal/mol) |
|--------------------------|---------------------------------------------------------------------|----------------------------------------------------------------------------------------|-------------------------------------------------------------------------|---------------------------------------------------------------------------------------------------------------------|----------------------------------------------------------|
| (R)-TS1 <sub>P</sub> -Br | -3512.807029                                                        | 0.339202                                                                               | -3515.764676                                                            | -3515.425474                                                                                                        | 0                                                        |
| (S)-TS1 <sub>P</sub> -Br | -3512.797441                                                        | 0.339792                                                                               | -3515.755215                                                            | -3515.415423                                                                                                        | 6.307101                                                 |
| (R)-TS2 <sub>P</sub> -Br | -3512.79657                                                         | 0.340676                                                                               | -3515.7581                                                              | -3515.417424                                                                                                        | 5.05145389                                               |
| (S)-TS2 <sub>P</sub> -Br | -3512.804072                                                        | 0.339866                                                                               | -3515.764418                                                            | -3515.424552                                                                                                        | 0.578564035                                              |
| (R)-TS3 <sub>P</sub> -Br | -3512.79908                                                         | 0.339631                                                                               | -3515.75725                                                             | -3515.417619                                                                                                        | 4.929089479                                              |
| (S)-TS3 <sub>P</sub> -Br | -3512.798467                                                        | 0.339054                                                                               | -3515.757188                                                            | -3515.418134                                                                                                        | 4.605921932                                              |

**Supplementary Table 22.** Energies of all transition states for enamine addition to 2-bromopentanal. Reported relative Gibbs free energies for structures optimized at the IEFPCM<sub>(DCM)</sub>M06-2X/6-311++G(2d,2p)//IEFPCM<sub>(DCM)</sub>M06-2X/6-31+G(d,p) level of theory represent the sum of the thermal correction to Gibbs free energy computed at the IEFPCM<sub>(DCM)</sub>M06-2X/6-31+G(d,p) level of theory and single point electronic energies computed at the IEFPCM<sub>(DCM)</sub>M06-2X/6-311++G(2d,2p). All energies are reported in Hartree except the relative energies.

| Structure                | Gibbs Free Energies (G), IEFPCM <sub>(DCM)</sub> M06-2X/6-31+G(d,p) | Thermal Corrections to Gibbs Free Energies, IEFPCM <sub>(DCM)</sub> M06-2X/6-31+G(d,p) | Single Point Energies, E IEFPCM <sub>(DCM)</sub> M06-2X/6-311++G(2d,2p) | Gibbs Free Energies (G), IEFPCM <sub>(DCM)</sub> M06-2X/6-311++G(2d,2p)//IEFPCM <sub>(DCM)</sub> M06-2X/6-31+G(d,p) | Relative Energies to (R)-TS1 <sub>G</sub> -Br (Kcal/mol) |
|--------------------------|---------------------------------------------------------------------|----------------------------------------------------------------------------------------|-------------------------------------------------------------------------|---------------------------------------------------------------------------------------------------------------------|----------------------------------------------------------|
| (R)-TS1 <sub>G</sub> -Br | -3476.894285                                                        | 0.363361                                                                               | -3479.861538                                                            | -3479.498177                                                                                                        | 0                                                        |
| (S)-TS1 <sub>G</sub> -Br | -3476.887892                                                        | 0.363834                                                                               | -3479.855148                                                            | -3479.491314                                                                                                        | 4.306599757                                              |
| (R)-TS2 <sub>G</sub> -Br | -3476.884545                                                        | 0.364163                                                                               | -3479.855265                                                            | -3479.491102                                                                                                        | 4.439631835                                              |
| (S)-TS2 <sub>G</sub> -Br | -3476.892016                                                        | 0.363804                                                                               | -3479.861757                                                            | -3479.497953                                                                                                        | 0.140562195                                              |

|                          |              |          |              |              |             |
|--------------------------|--------------|----------|--------------|--------------|-------------|
| (R)-TS3 <sub>G</sub> -Br | -3476.886609 | 0.364378 | -3479.854643 | -3479.490265 | 4.964857538 |
| (S)-TS3 <sub>G</sub> -Br | -3476.886337 | 0.363619 | -3479.854911 | -3479.491292 | 4.320404973 |

**Supplementary Table 23.** Energies of all transition states for enamine addition to 2-bromopentanal. Reported relative Gibbs free energies for structures optimized at the IEFPCM<sub>(DCM)</sub>M06-2X/6-311++G(2d,2p)//IEFPCM<sub>(DCM)</sub>M06-2X/6-31+G(d,p) level of theory represent the sum of the thermal correction to Gibbs free energy computed at the IEFPCM<sub>(DCM)</sub>M06-2X/6-31+G(d,p) level of theory and single point energies computed at the IEFPCM<sub>(DCM)</sub>M06-2X/6-311++G(2d,2p). All energies are reported in Hartree except the relative energies.

| Structure                | Gibbs Free Energies (G), IEFPCM <sub>(DCM)</sub> M06-2X/6-31+G(d,p) | Thermal Corrections to Gibbs Free Energies, IEFPCM <sub>(DCM)</sub> M06-2X/6-31+G(d,p) | Single Point Energies, E IEFPCM <sub>(DCM)</sub> M06-2X/6-311++G(2d,2p) | Gibbs Free Energies (G), IEFPCM <sub>(DCM)</sub> M06-2X/6-311++G(2d,2p)//IEFPCM <sub>(DCM)</sub> M06-2X/6-31+G(d,p) | Relative Energies to (R)-TS1 <sub>O</sub> -Br (Kcal/mol) |
|--------------------------|---------------------------------------------------------------------|----------------------------------------------------------------------------------------|-------------------------------------------------------------------------|---------------------------------------------------------------------------------------------------------------------|----------------------------------------------------------|
| (R)-TS1 <sub>O</sub> -Br | -3627.274362                                                        | 0.367844                                                                               | -3630.294358                                                            | -3629.926514                                                                                                        | 0                                                        |
| (S)-TS1 <sub>O</sub> -Br | -3627.270827                                                        | 0.367855                                                                               | -3630.290158                                                            | -3629.922303                                                                                                        | 2.642443768                                              |
| (R)-TS2 <sub>O</sub> -Br | -3627.266059                                                        | 0.369445                                                                               | -3630.289223                                                            | -3629.919778                                                                                                        | 4.226906013                                              |
| (S)-TS2 <sub>O</sub> -Br | -3627.272308                                                        | 0.368103                                                                               | -3630.293793                                                            | -3629.92569                                                                                                         | 0.517068075                                              |
| (R)-TS3 <sub>O</sub> -Br | -3627.26738                                                         | 0.36793                                                                                | -3630.286244                                                            | -3629.918314                                                                                                        | 5.14558036                                               |
| (S)-TS3 <sub>O</sub> -Br | -3627.265946                                                        | 0.368051                                                                               | -3630.285366                                                            | -3629.917315                                                                                                        | 5.77246265                                               |

**Supplementary Table 24.** Energies of all transition states for enamine addition to 2-bromopentanal. Reported relative Gibbs free energies for structures optimized at the IEFPCM<sub>(DCM)</sub>M06-2X/6-311++G(2d,2p)//IEFPCM<sub>(DCM)</sub>M06-2X/6-31+G(d,p) level of theory represent the sum of the thermal correction to Gibbs free energy computed at the IEFPCM<sub>(DCM)</sub>M06-2X/6-31+G(d,p) level of theory and single point energies computed at the IEFPCM<sub>(DCM)</sub>M06-2X/6-311++G(2d,2p). All energies are reported in Hartree except the relative energies.

| Structure                | Gibbs Free Energies (G), IEFPCM <sub>(DCM)</sub> M06-2X/6-31+G(d,p) | Thermal Corrections to Gibbs Free Energies, IEFPCM <sub>(DCM)</sub> M06-2X/6-31+G(d,p) | Single Point Energies, E IEFPCM <sub>(DCM)</sub> M06-2X/6-311++G(2d,2p) | Gibbs Free Energies (G), IEFPCM <sub>(DCM)</sub> M06-2X/6-311++G(2d,2p)//IEFPCM <sub>(DCM)</sub> M06-2X/6-31+G(d,p) | Relative Energies to (R)-TS1 <sub>T</sub> -Br (Kcal/mol) |
|--------------------------|---------------------------------------------------------------------|----------------------------------------------------------------------------------------|-------------------------------------------------------------------------|---------------------------------------------------------------------------------------------------------------------|----------------------------------------------------------|
| (R)-TS1 <sub>T</sub> -Br | -3835.779609                                                        | 0.335333                                                                               | -3838.741514                                                            | -3838.406181                                                                                                        | 0                                                        |

|                                           |              |          |              |              |             |
|-------------------------------------------|--------------|----------|--------------|--------------|-------------|
| ( <i>S</i> )- <b>TS1</b> <sub>T</sub> -Br | -3835.77367  | 0.335793 | -3838.735267 | -3838.399474 | 4.208708229 |
| ( <i>R</i> )- <b>TS2</b> <sub>T</sub> -Br | -3835.769038 | 0.335789 | -3838.734498 | -3838.398709 | 4.688753226 |
| ( <i>S</i> )- <b>TS2</b> <sub>T</sub> -Br | -3835.777067 | 0.335558 | -3838.741723 | -3838.406165 | 0.010040157 |
| ( <i>R</i> )- <b>TS3</b> <sub>T</sub> -Br | -3835.773702 | 0.33612  | -3838.736601 | -3838.400481 | 3.57680586  |
| ( <i>S</i> )- <b>TS3</b> <sub>T</sub> -Br | -3835.772793 | 0.335584 | -3838.734863 | -3838.399279 | 4.331072639 |

## Noncovalent Interaction (NCI) Surfaces

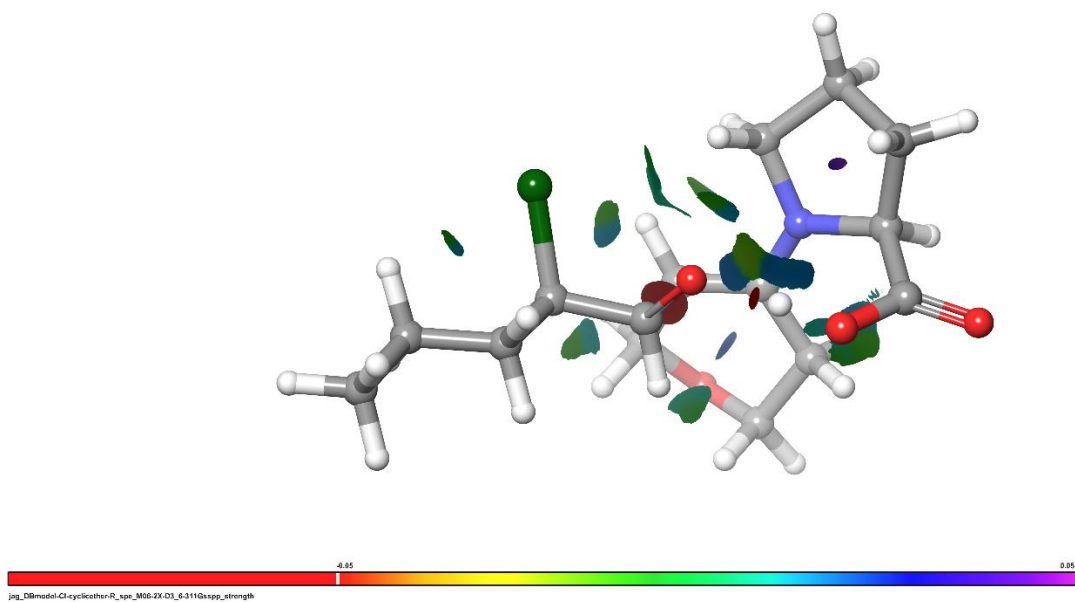

**Supplementary Figure 87.** Noncovalent Interaction (NCI) Surfaces of transition states (*R*)-**TS1**<sub>P</sub>-Cl (isovalue = 0.3, min = -0.5 and max = 0.5) computed at the M06-2X-D3/LACV3P++\*\* level of theory.

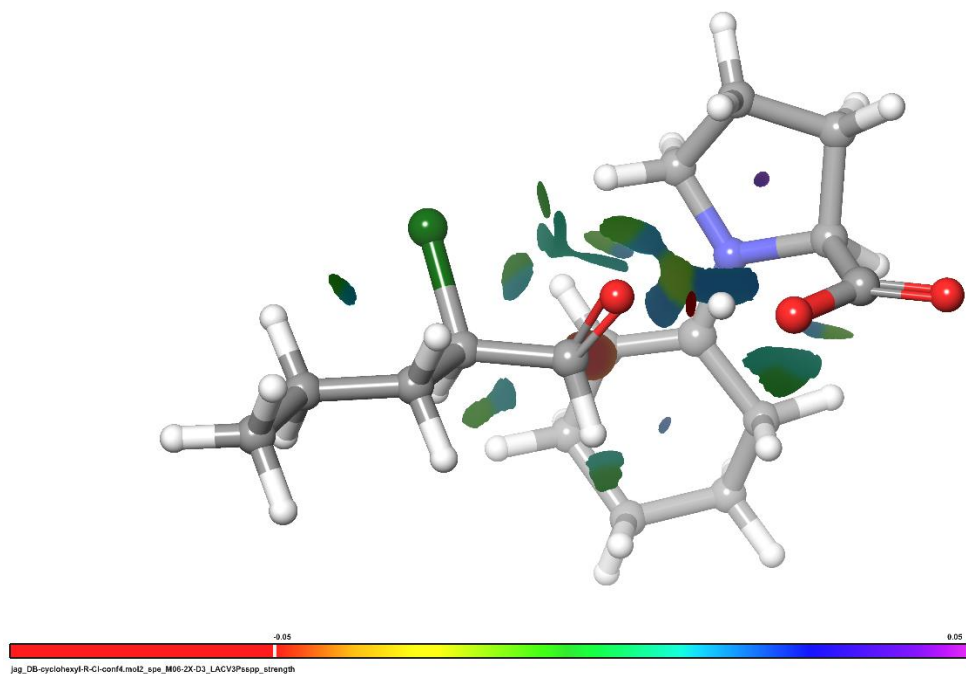

**Supplementary Figure 88.** Noncovalent Interaction (NCI) Surfaces of transition states (*R*)-**TS1<sub>G</sub>**-Cl (isovalue = 0.3, min = -0.5 and max = 0.5) computed at the M06-2X-D3/LACV3P++\*\* level of theory.

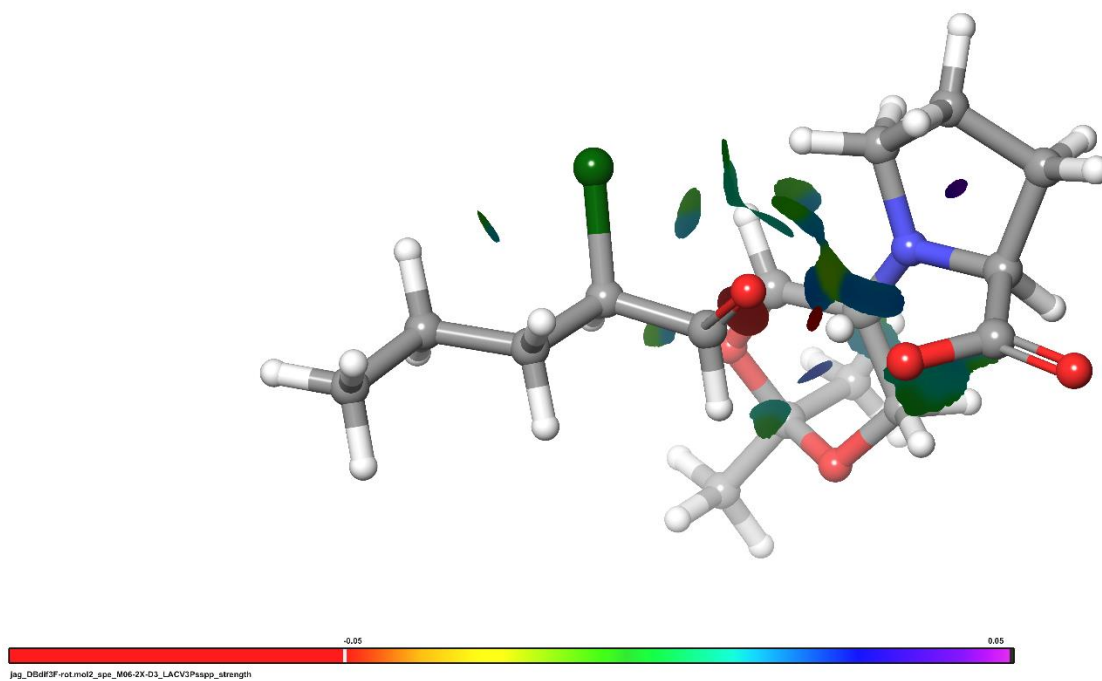

**Supplementary Figure 89.** Noncovalent Interaction (NCI) Surfaces of transition states (*R*)-**TS1<sub>O</sub>**-Cl (isovalue = 0.3, min = -0.5 and max = 0.5) computed at the M06-2X-D3/LACV3P++\*\* level of theory.

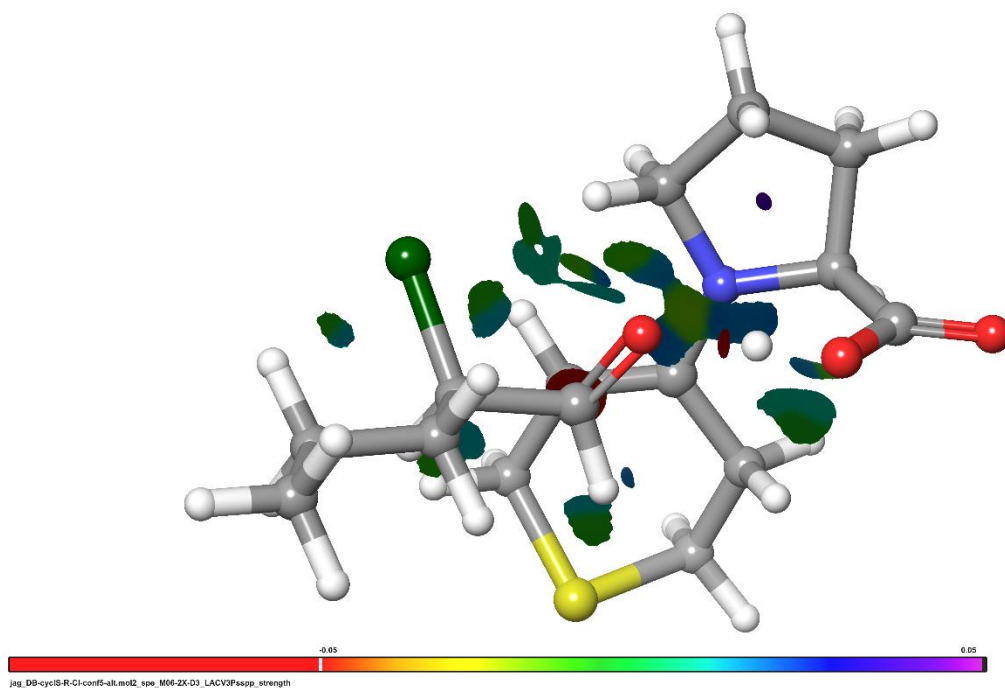

**Supplementary Figure 90.** Noncovalent Interaction (NCI) Surfaces of transition states (*R*)-**TS1<sub>T</sub>**-Cl (isovalue = 0.3, min = -0.5 and max = 0.5) computed at the M06-2X-D3/LACV3P++\*\* level of theory.

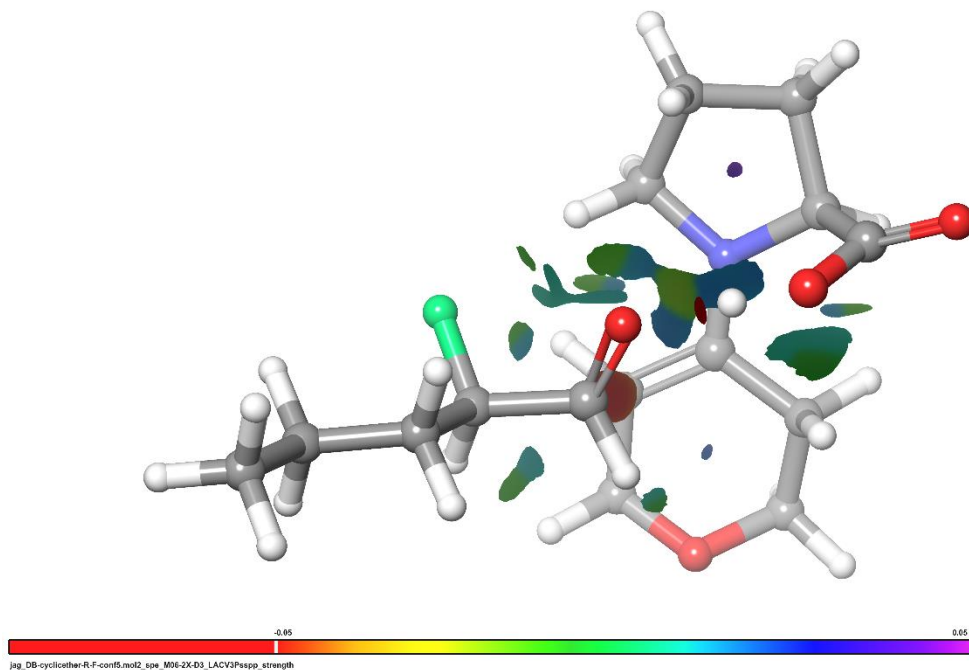

**Supplementary Figure 91.** Noncovalent Interaction (NCI) Surfaces of transition states (*R*)-**TS1<sub>p</sub>**-F (isovalue = 0.3, min = -0.5 and max = 0.5) computed at the M06-2X-D3/LACV3P++\*\* level of theory.

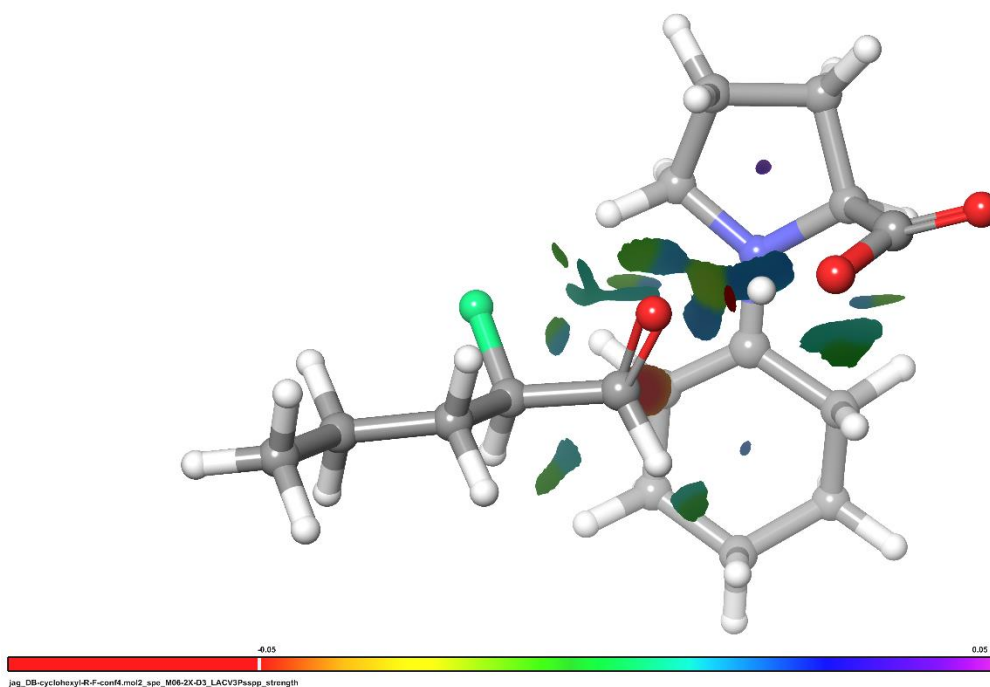

**Supplementary Figure 92.** Noncovalent Interaction (NCI) Surfaces of transition states (*R*)-**TS1<sub>g</sub>**-F (isovalue = 0.3, min = -0.5 and max = 0.5) computed at the M06-2X-D3/LACV3P++\*\* level of theory.



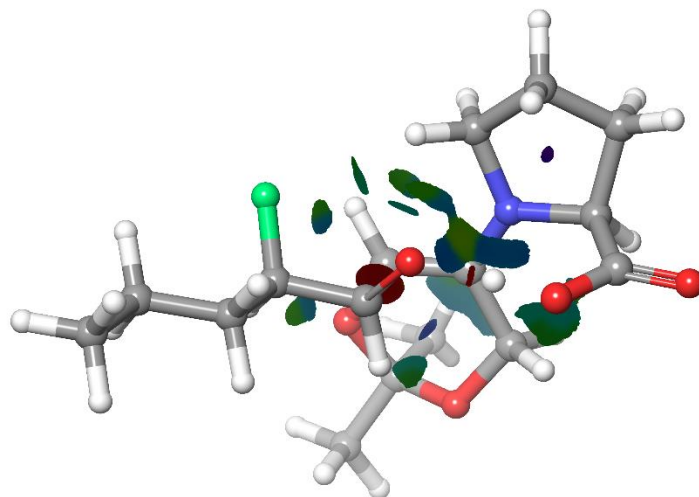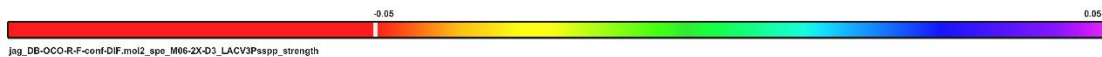

**Supplementary Figure 93.** Noncovalent Interaction (NCI) Surfaces of transition states (*R*)-**TS1<sub>O</sub>-F** (isovalue = 0.3, min = -0.5 and max = 0.5) computed at the M06-2X-D3/LACV3P++\*\* level of theory.

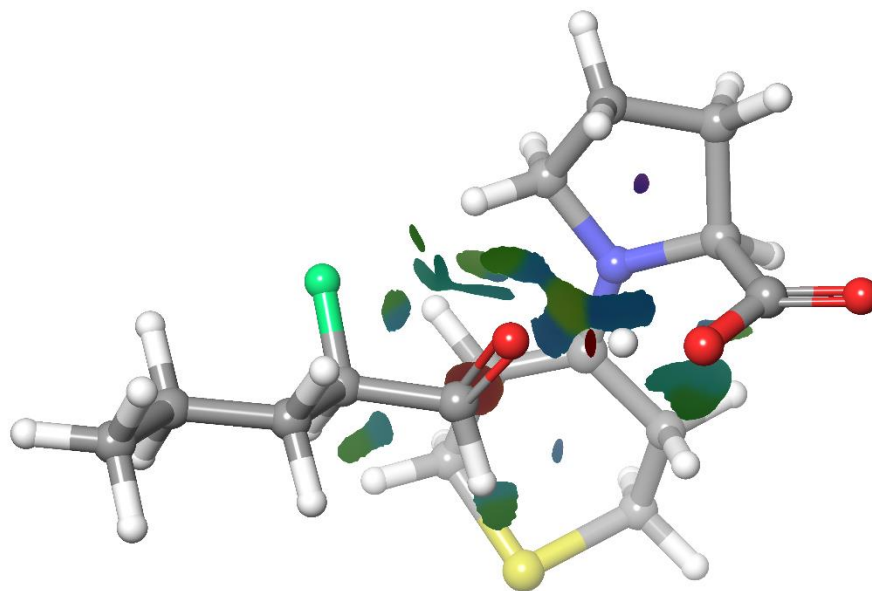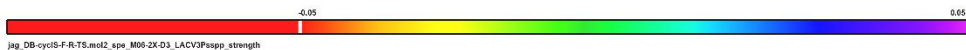

**Supplementary Figure 94.** Noncovalent Interaction (NCI) Surfaces of transition states (*R*)-**TS1<sub>T</sub>**-F (isovalue = 0.3, min = -0.5 and max = 0.5) computed at the M06-2X-D3/LACV3P++\*\* level of theory.

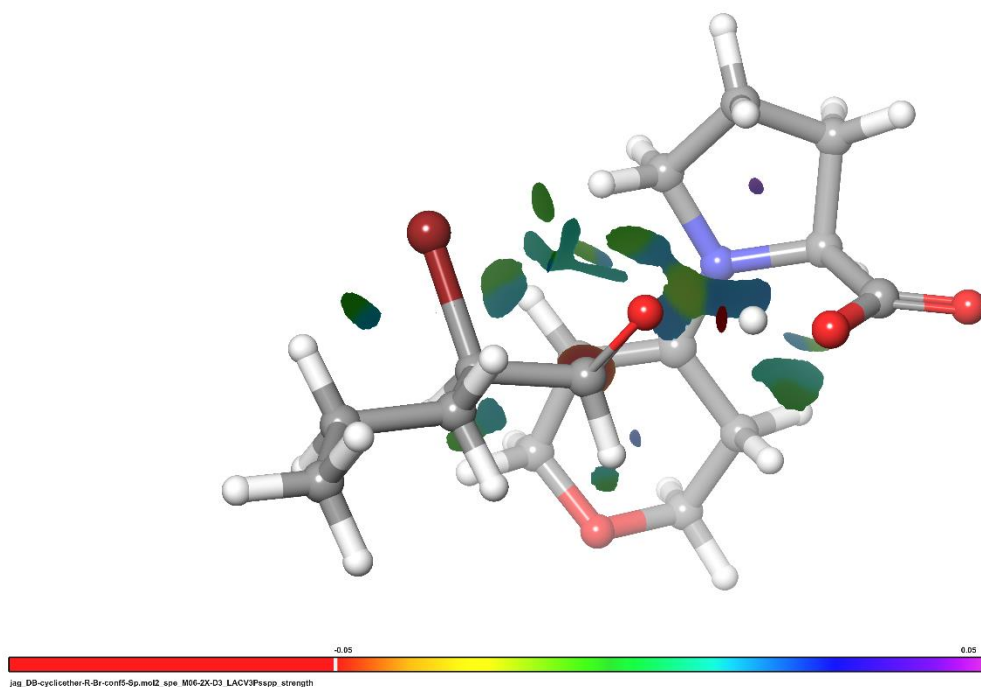

**Supplementary Figure 95.** Noncovalent Interaction (NCI) Surfaces of transition states (*R*)-**TS1<sub>P</sub>**-Br (isovalue = 0.3, min = -0.5 and max = 0.5) computed at the M06-2X-D3/LACV3P++\*\* level of theory.

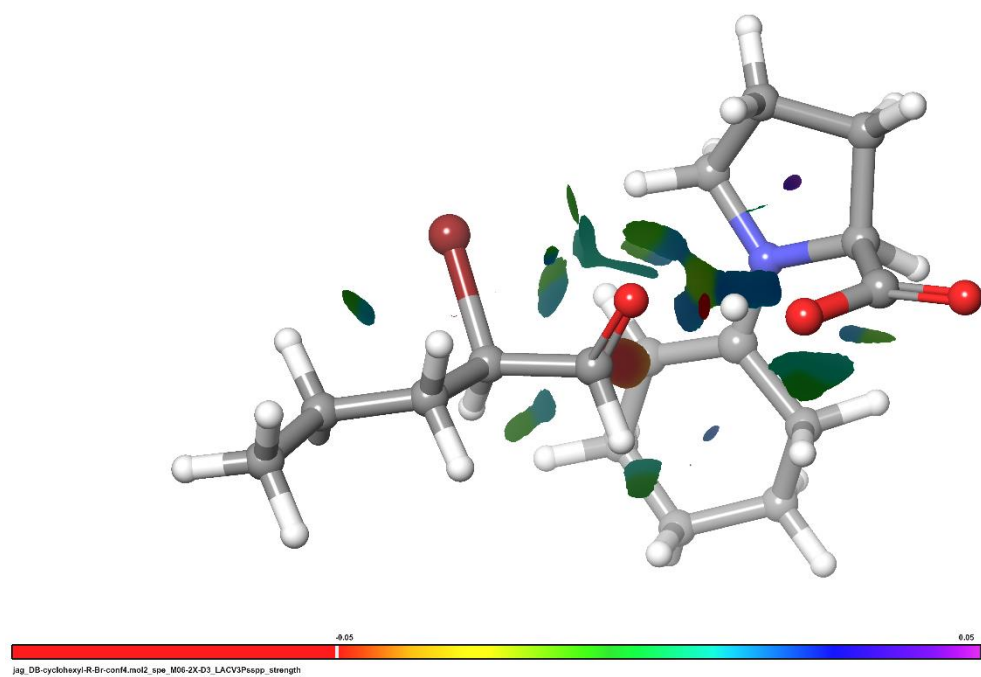

**Supplementary Figure 96.** Noncovalent Interaction (NCI) Surfaces of transition states (*R*)-**TS1<sub>G</sub>**-Br (isovalue = 0.3, min = -0.5 and max = 0.5) computed at the M06-2X-D3/LACV3P++\*\* level of theory.

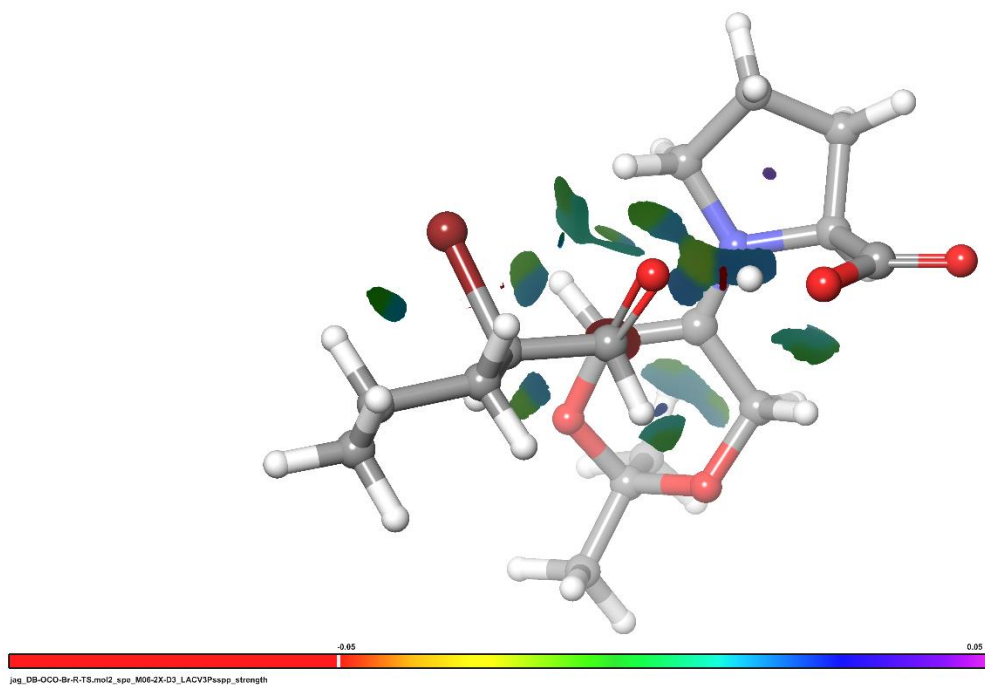

**Supplementary Figure 97.** Noncovalent Interaction (NCI) Surfaces of transition states (*R*)-**TS1<sub>O</sub>**-Br (isovalue = 0.3, min = -0.5 and max = 0.5) computed at the M06-2X-D3/LACV3P++\*\* level of theory.

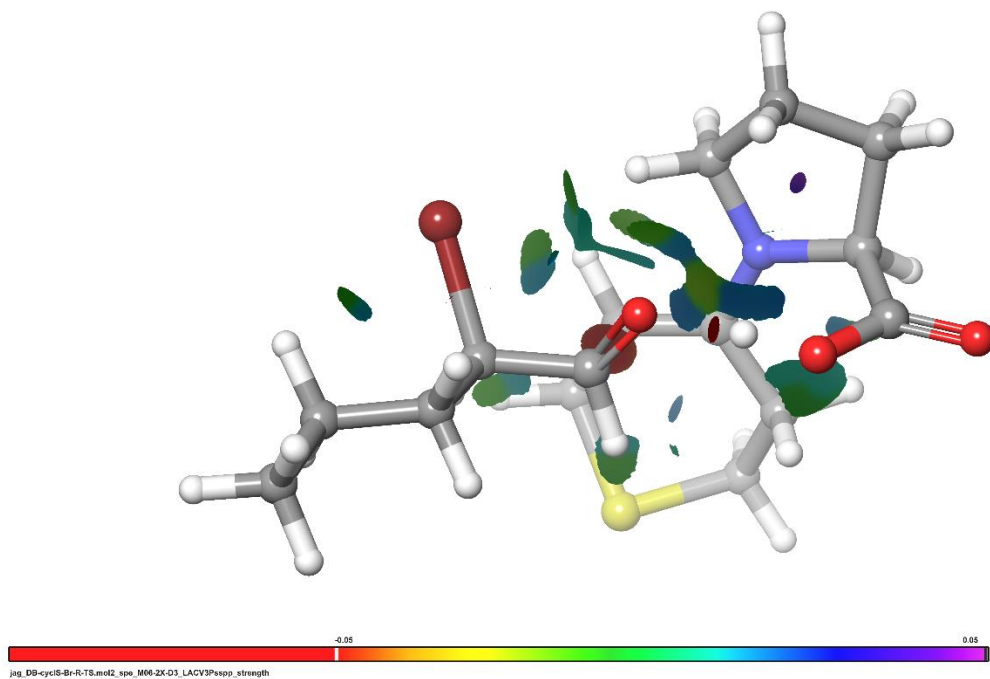

**Supplementary Figure 98.** Noncovalent Interaction (NCI) Surfaces of transition states (R)-TS<sub>1</sub>-Br (isovalue = 0.3, min = -0.5 and max = 0.5) computed at the M06-2X-D3/LACV3P++\*\* level of theory.

## Figures of Fixed Internal Coordinates used for Conformational Searches

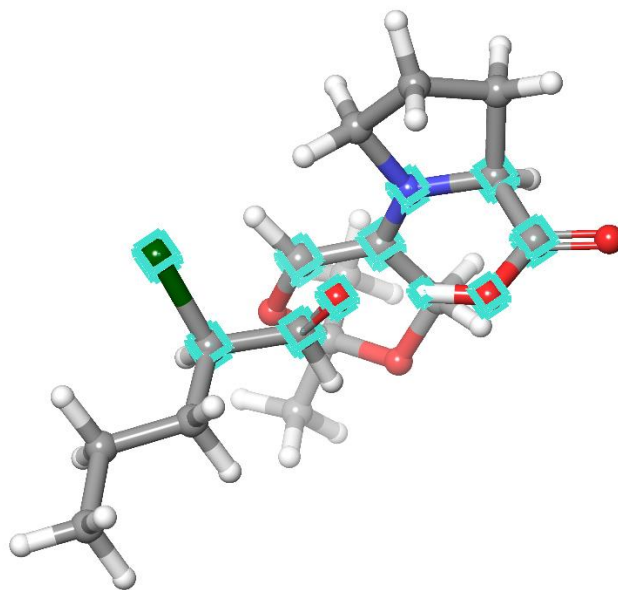

**Supplementary Figure 99.** Fixed internal coordinate of Dudding-Britton-type transition state model for addition of enamine derived cyclohexanone to (*R*)-2-chloropentanal.

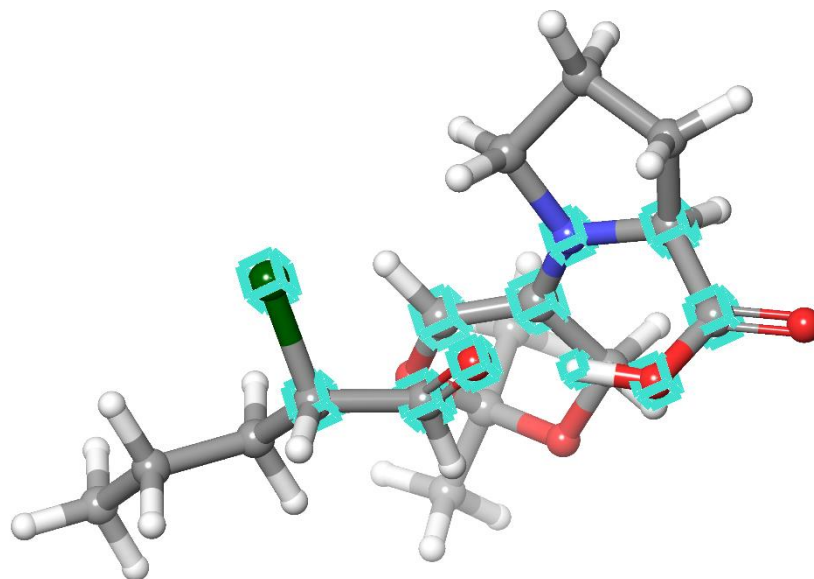

**Supplementary Figure 100.** Fixed internal coordinate of Dudding-Britton-type transition state model for addition of enamine derived cyclohexanone to (*S*)-2-chloropentanal.

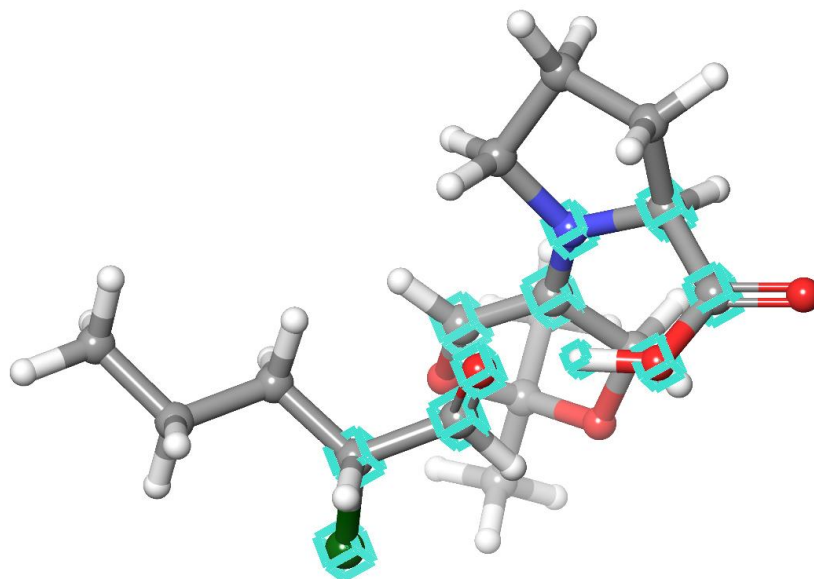

**Supplementary Figure 101.** Fixed internal coordinate of Evans-Cornforth-type transition state model for addition of enamine derived cyclohexanone to (*R*)-2-chloropentanal.

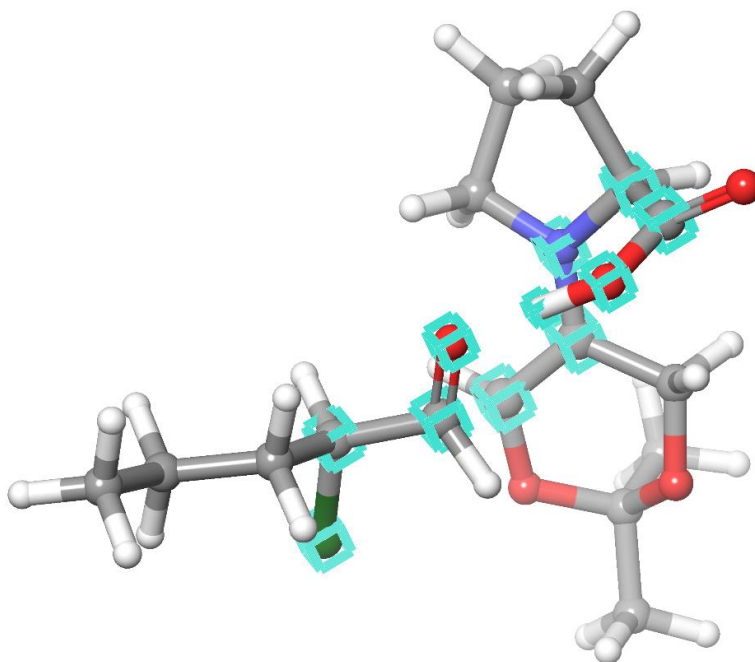

**Supplementary Figure 102.** Fixed internal coordinate of Evans-Cornforth-type transition state model for addition of enamine derived cyclohexanone to (*S*)-2-chloropentanal.

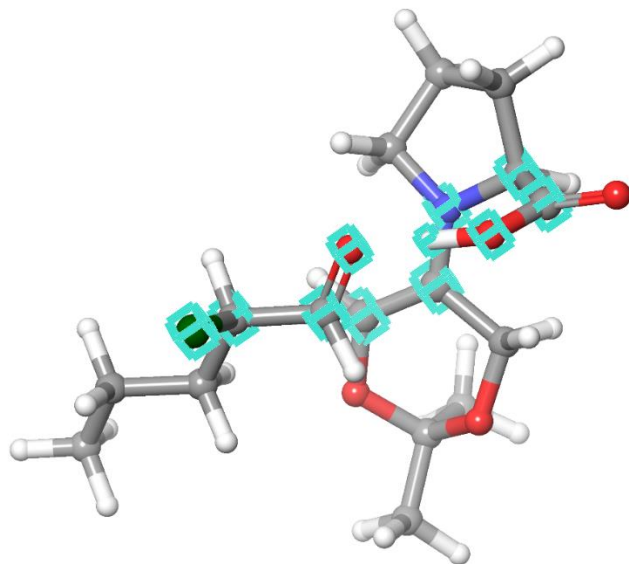

**Supplementary Figure 103.** Fixed internal coordinate of Felkin-Anh-type transition state model for addition of enamine derived cyclohexanone to (*R*)-2-chloropentanal.

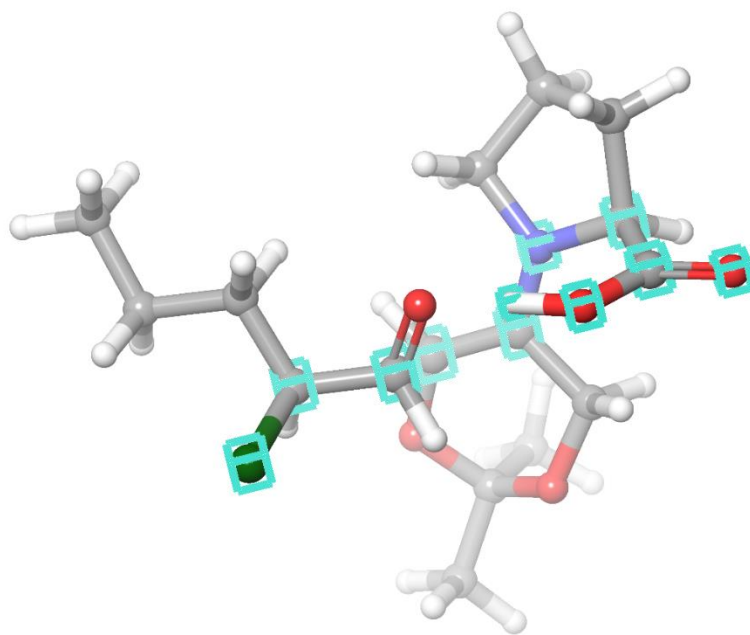

**Supplementary Figure 104.** Fixed internal coordinate of Felkin-Anh-type transition state model for addition of enamine derived cyclohexanone to (*S*)-2-chloropentanal.

## Supplementary Data for Natural Bond Orbital Analysis

Computed natural bond orbital (NBO) energies for fluoride atom lone pair ( $n$ ) donation into a H-C( $sp^2$ ) anti-bonding orbital (\*) of the enamine ( $\eta_F \rightarrow \sigma^*_{(C-H)}$ ) of (*R*)-**TS1**<sub>O-F</sub>.

Second Order Perturbation Theory Analysis of Fock Matrix in NBO Basis.

| Donor NBO (i)    | Acceptor NBO (j)        | E(2)<br>kcal/mol | E(j)-E(i)<br>a.u. | F(i,j)<br>a.u. |
|------------------|-------------------------|------------------|-------------------|----------------|
| 87. LP ( 1) F 49 | /516. BD*( 1) C 1 - H 2 | 0.22             | 1.68              | 0.017          |
| 88. LP ( 2) F 49 | /516. BD*( 1) C 1 - H 2 | 0.38             | 1.02              | 0.018          |
| 89. LP ( 3) F 49 | /516. BD*( 1) C 1 - H 2 | 0.47             | 1.02              | 0.020          |

Overall energetic contribution = 1.07 kcal/mol
